# Supplementary material for: Prognostic and therapeutic implications of extracellular matrix associated gene signature in renal clear cell carcinoma
Source: PubMed Central journal article supplement (PMC8026590; doi:10.1038/s41598-021-86888-7), 2021-04-07

## **Prognostic and therapeutic implications of extracellular matrix associated gene signature in renal clear cell carcinoma**

Pankaj Ahluwalia<sup>1</sup>, Meenakshi Ahluwalia<sup>1</sup>, Ashis K. Mondal<sup>1</sup>, Nikhil Sahajpal<sup>1</sup>, Vamsi Kota<sup>2</sup>, Mumtaz V. Rojjani<sup>1</sup>, Aryn M. Rojjani<sup>1</sup>, and Ravindra Kolhe<sup>1\*</sup>

<sup>1</sup> Department of Pathology, Medical College of Georgia, Augusta University, GA, U.S.A.

<sup>2</sup> Department of Medicine, Medical College of Georgia, Augusta University, GA, U.S.A.

\* Correspondence: rkolhe@augusta.edu; Tel.: (706)-721-2771; Fax :(706)-434-6053

**Supplementary figure 1:** Distribution of immune cells in these two risk groups using CIBERSORT-ABS algorithm.

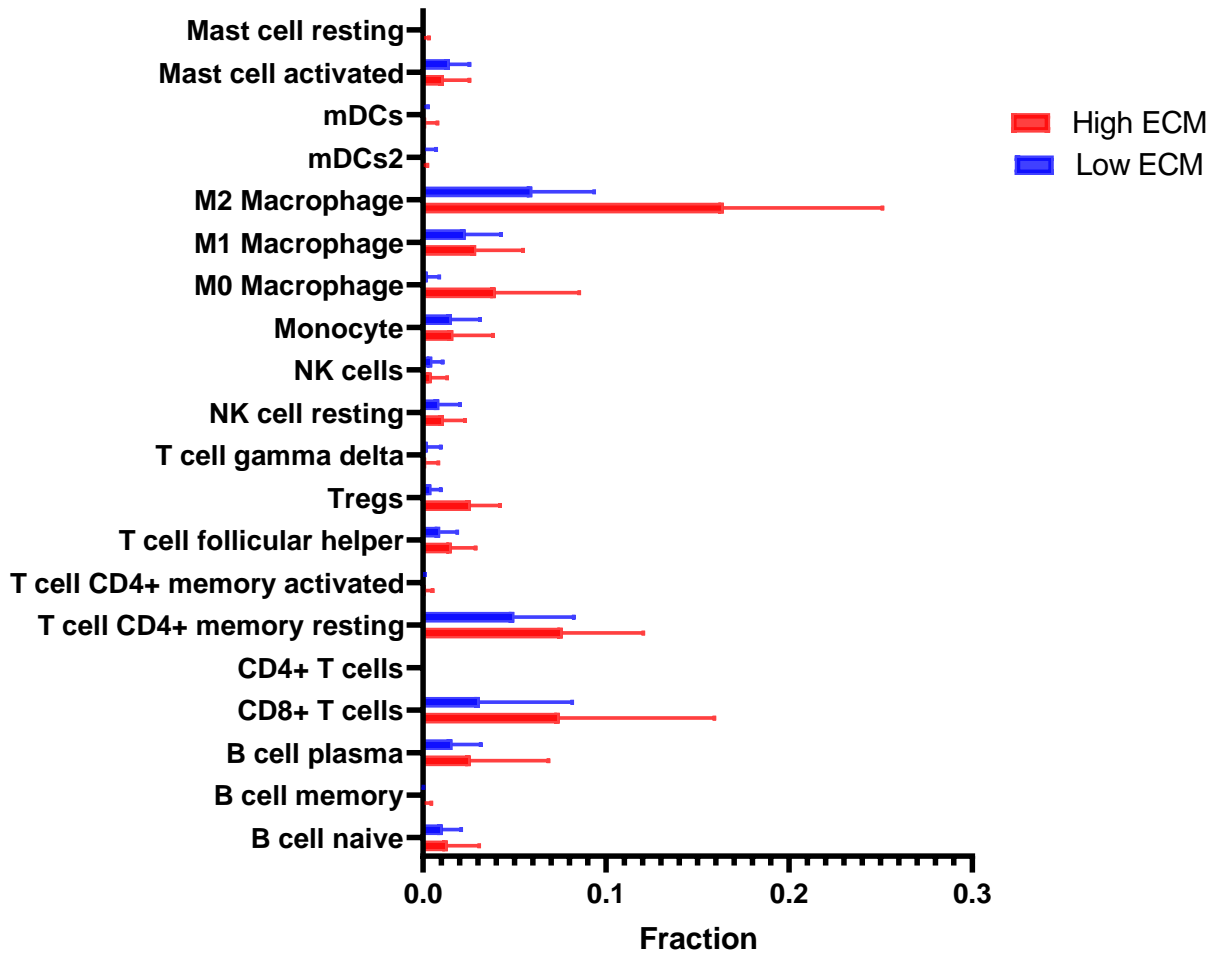

Supplement: 41598_2021_86888_MOESM1_ESM.pdf [file 41598_2021_86888_MOESM1_ESM.pdf]
