# Supplementary material for: Prognostic and therapeutic implications of extracellular matrix associated gene signature in renal clear cell carcinoma
Source: PubMed Central journal article supplement (PMC8026590; doi:10.1038/s41598-021-86888-7), 2021-04-07
Supplement: 41598_2021_86888_MOESM3_ESM.pdf [file 41598_2021_86888_MOESM3_ESM.pdf]

## **Prognostic and therapeutic implications of extracellular matrix associated gene signature in renal clear cell carcinoma**

Pankaj Ahluwalia<sup>1</sup>, Meenakshi Ahluwalia<sup>1</sup>, Ashis K. Mondal<sup>1</sup>, Nikhil Sahajpal<sup>1</sup>, Vamsi Kota<sup>2</sup>, Mumtaz V. Rojjani<sup>1</sup>, Aryn M. Rojjani<sup>1</sup>, and Ravindra Kolhe<sup>1\*</sup>

<sup>1</sup> Department of Pathology, Medical College of Georgia, Augusta University, GA, U.S.A.

<sup>2</sup> Department of Medicine, Medical College of Georgia, Augusta University, GA, U.S.A.

\* Correspondence: rkolhe@augusta.edu; Tel.: (706)-721-2771; Fax :(706)-434-6053

**Supplementary Table 1: ECM genes analyzed in this study.**

|               |                      |                      |                       |                      |                      |                      |                        |               |               |
|---------------|----------------------|----------------------|-----------------------|----------------------|----------------------|----------------------|------------------------|---------------|---------------|
| <i>ECM2</i>   | <i>FIBCD1</i>        | <i>CILP</i>          | <i>S100A4</i>         | <i>C1QC</i>          | <i>PCSK6</i>         | <i>APOD</i>          | <i>CSGALNAC<br/>T1</i> | <i>NOTCH1</i> | <i>FZD4</i>   |
| <i>FRAS1</i>  | <i>COL20A1</i>       | <i>HMCN1</i>         | <i>ANXA5</i>          | <i>NCAN</i>          | <i>ITGA6</i>         | <i>FGFR4</i>         | <i>BLOC1S1</i>         | <i>ITGAM</i>  | <i>FGF1</i>   |
| <i>ECM1</i>   | <i>LGALS4</i>        | <i>COL28A1</i>       | <i>ANXA2P2</i>        | <i>ANGPTL4</i>       | <i>TNR</i>           | <i>LICAM</i>         | <i>MPV17</i>           | <i>NFKB2</i>  | <i>NF1</i>    |
| <i>MEPE</i>   | <i>TECTB</i>         | <i>COL8A1</i>        | <i>S100A6</i>         | <i>INHBE</i>         | <i>CTSG</i>          | <i>VCAM1</i>         | <i>ATXN1L</i>          | <i>JAM2</i>   | <i>BMP7</i>   |
| <i>MUC5B</i>  | <i>ZPLD1</i>         | <i>COL5A2</i>        | <i>ITIH2</i>          | <i>ADAMTS1<br/>8</i> | <i>TIMP1</i>         | <i>UMODL1</i>        | <i>SKP2</i>            | <i>TFIP11</i> | <i>TEK</i>    |
| <i>BMPER</i>  | <i>CHADL</i>         | <i>FMOD</i>          | <i>LOXL4</i>          | <i>MBL2</i>          | <i>PLG</i>           | <i>PECAM1</i>        | <i>CER1</i>            | <i>ITGAX</i>  | <i>VEGFA</i>  |
| <i>VWF</i>    | <i>COL14A1</i>       | <i>ADAMTS5</i>       | <i>LAMB2</i>          | <i>ADAMTS1<br/>6</i> | <i>CTSL</i>          | <i>CCN1</i>          | <i>PTX3</i>            | <i>ERO1A</i>  | <i>APOE</i>   |
| <i>ZAN</i>    | <i>NYX</i>           | <i>RTBDN</i>         | <i>LUM</i>            | <i>GPC5</i>          | <i>ITGB6</i>         | <i>CCN2</i>          | <i>F7</i>              | <i>GLRX2</i>  | <i>WNT11</i>  |
| <i>FCGBP</i>  | <i>KAZALD1</i>       | <i>COL16A1</i>       | <i>POSTN</i>          | <i>F13A1</i>         | <i>PHOSPH<br/>O1</i> | <i>LAMP2</i>         | <i>VCL</i>             | <i>WNT4</i>   | <i>RELN</i>   |
| <i>MUC6</i>   | <i>VIT</i>           | <i>PRG2</i>          | <i>GFUS</i>           | <i>PAPLN</i>         | <i>SERPINB5</i>      | <i>SPINT1</i>        | <i>RARRES2</i>         | <i>GLUD1</i>  | <i>WNT3A</i>  |
| <i>MUC2</i>   | <i>COL10A1</i>       | <i>OGN</i>           | <i>ADAMTSL<br/>2</i>  | <i>ADAMTS7</i>       | <i>CRTAP</i>         | <i>NRROS</i>         | <i>GH1</i>             | <i>THY1</i>   | <i>LRP5</i>   |
| <i>OTOGL</i>  | <i>COL4A4</i>        | <i>EYS</i>           | <i>FGL1</i>           | <i>CFP</i>           | <i>ACHE</i>          | <i>MYO1E</i>         | <i>ACTG1</i>           | <i>JUP</i>    | <i>FGF10</i>  |
| <i>SSPOP</i>  | <i>COL9A1</i>        | <i>ACAN</i>          | <i>CPA3</i>           | <i>BCAN</i>          | <i>SPOCK2</i>        | <i>PRDX4</i>         | <i>SPACA3</i>          | <i>IQGAP1</i> | <i>LGALS9</i> |
| <i>MUC5AC</i> | <i>COL9A2</i>        | <i>CLEC14A</i>       | <i>ZG16</i>           | <i>ITGB4</i>         | <i>IDH2</i>          | <i>NPHS1</i>         | <i>ADGRG6</i>          | <i>PTPRJ</i>  | <i>CD4</i>    |
| <i>OTOG</i>   | <i>COL9A3</i>        | <i>ADAMTSL<br/>4</i> | <i>TLL2</i>           | <i>ANXA7</i>         | <i>CTHRC1</i>        | <i>FCN1</i>          | <i>PKM</i>             | <i>IFNA2</i>  | <i>ERCC2</i>  |
| <i>FREM2</i>  | <i>COL19A1</i>       | <i>TNC</i>           | <i>TFPI2</i>          | <i>ANXA4</i>         | <i>ADAMTS1</i>       | <i>LEFTY2</i>        | <i>ADAM10</i>          | <i>SMPD3</i>  | <i>KARS1</i>  |
| <i>FREM1</i>  | <i>LAMA4</i>         | <i>STATH</i>         | <i>KLK4</i>           | <i>ENTPD2</i>        | <i>MYOC</i>          | <i>SOST</i>          | <i>FLOT1</i>           | <i>CXCL12</i> | <i>SCX</i>    |
| <i>FREM3</i>  | <i>LAMB4</i>         | <i>ADAMTSL<br/>1</i> | <i>EGFL7</i>          | <i>SERPINB1</i>      | <i>ITGB5</i>         | <i>SEMA3B</i>        | <i>TGFB1</i>           | <i>ITGB2</i>  | <i>CAV2</i>   |
| <i>FAM20C</i> | <i>BCAM</i>          | <i>ADAMTS1<br/>4</i> | <i>SERAC1</i>         | <i>CSTB</i>          | <i>SERPINA5</i>      | <i>ANGPT2</i>        | <i>AGT</i>             | <i>ANGPT1</i> | <i>FOXF1</i>  |
| <i>EFEMP1</i> | <i>HAPLN2</i>        | <i>HPSE2</i>         | <i>C1QB</i>           | <i>DMBT1</i>         | <i>SLPI</i>          | <i>MST1</i>          | <i>UMOD</i>            | <i>F2</i>     | <i>CYP1B1</i> |
| <i>EFEMP2</i> | <i>ANGPTL6</i>       | <i>SCARA3</i>        | <i>AMELX</i>          | <i>CLEC3B</i>        | <i>THBS4</i>         | <i>HSD17B1<br/>2</i> | <i>TGFB111</i>         | <i>CALR</i>   | <i>SRC</i>    |
| <i>SULF1</i>  | <i>OIT3</i>          | <i>ADAMTSL<br/>3</i> | <i>NTNG2</i>          | <i>ITIH4</i>         | <i>TGM2</i>          | <i>GPC6</i>          | <i>ZP3</i>             | <i>SMAD3</i>  | <i>ABL1</i>   |
| <i>SULF2</i>  | <i>GP2</i>           | <i>TINAG</i>         | <i>LAMA2</i>          | <i>ORM1</i>          | <i>ANXA6</i>         | <i>SPP1</i>          | <i>SPN</i>             | <i>KDR</i>    | <i>PTK2</i>   |
| <i>LACRT</i>  | <i>SMOC1</i>         | <i>ADAMTS6</i>       | <i>IGFBP7</i>         | <i>ORM2</i>          | <i>KRT1</i>          | <i>P4HA1</i>         | <i>S100A9</i>          | <i>ITGA8</i>  | <i>CX3CL1</i> |
| <i>SOD3</i>   | <i>ADAMTS1<br/>5</i> | <i>TLL1</i>          | <i>ITGA2B</i>         | <i>PHLDB2</i>        | <i>SERPINA3</i>      | <i>ERO1B</i>         | <i>S100A8</i>          | <i>HPSE</i>   | <i>OGG1</i>   |
| <i>MGP</i>    | <i>TPSAB1</i>        | <i>ADAMTSL<br/>5</i> | <i>LINGO2</i>         | <i>SLK</i>           | <i>SERPINA1</i>      | <i>ICAM2</i>         | <i>CTSH</i>            | <i>LOXL3</i>  | <i>TYMS</i>   |
| <i>IMPG2</i>  | <i>PRSS1</i>         | <i>DGCR6</i>         | <i>LRRC24</i>         | <i>PLET1</i>         | <i>AZGP1</i>         | <i>TST</i>           | <i>APOA4</i>           | <i>TSC1</i>   | <i>CPS1</i>   |
| <i>MXRA5</i>  | <i>LYPD5</i>         | <i>COL4A2</i>        | <i>CCN5</i>           | <i>DDR1</i>          | <i>SERPINB6</i>      | <i>GAS2</i>          | <i>PLSCR1</i>          | <i>TGFBR3</i> | <i>DNMT3A</i> |
| <i>IMPG1</i>  | <i>NID1</i>          | <i>PXDN</i>          | <i>LRRN1</i>          | <i>CLASP1</i>        | <i>CTSV</i>          | <i>MRPL18</i>        | <i>B4GALT1</i>         | <i>CAT</i>    | <i>TENM1</i>  |
| <i>MATN1</i>  | <i>PODN</i>          | <i>COL18A1</i>       | <i>LRRN3</i>          | <i>LAMA1</i>         | <i>ITGAL</i>         | <i>RIC8A</i>         | <i>F11R</i>            | <i>IL6</i>    | <i>SOD1</i>   |
| <i>MMP23B</i> | <i>MFAP5</i>         | <i>HSPG2</i>         | <i>LRIG1</i>          | <i>ITGA7</i>         | <i>LMAN1</i>         | <i>LOX</i>           | <i>CD47</i>            | <i>CD200</i>  | <i>TLR2</i>   |
| <i>MMP20</i>  | <i>MATN3</i>         | <i>LAMB1</i>         | <i>THBS2</i>          | <i>RTN4RL2</i>       | <i>GPC4</i>          | <i>LOXL2</i>         | <i>CDH1</i>            | <i>PTN</i>    | <i>TLR3</i>   |
| <i>MMP21</i>  | <i>RBP3</i>          | <i>COL11A1</i>       | <i>SRPX</i>           | <i>VASN</i>          | <i>CTSD</i>          | <i>CASK</i>          | <i>SLC12A2</i>         | <i>BMP2</i>   | <i>SHH</i>    |
| <i>MMP19</i>  | <i>EDIL3</i>         | <i>SNED1</i>         | <i>VWC2</i>           | <i>DAG1</i>          | <i>WNT5B</i>         | <i>BCKDHB</i>        | <i>JAM3</i>            | <i>SFRP2</i>  | <i>FGFR2</i>  |
| <i>MMP28</i>  | <i>SNORC</i>         | <i>THBS3</i>         | <i>ENAM</i>           | <i>HAS3</i>          | <i>CTSB</i>          | <i>SIGLEC1</i>       | <i>CD34</i>            | <i>GPC3</i>   | <i>ATP7A</i>  |
| <i>MMP24</i>  | <i>LYPD3</i>         | <i>IGFALS</i>        | <i>TNFRSF11<br/>B</i> | <i>WNT2B</i>         | <i>PRTN3</i>         | <i>RPSA</i>          | <i>S100A7</i>          | <i>CDH2</i>   | <i>WNT5A</i>  |
| <i>MMP17</i>  | <i>COCH</i>          | <i>CAPNS1</i>        | <i>PLEKHA2</i>        | <i>MUC3A</i>         | <i>AMBP</i>          | <i>WNT6</i>          | <i>F3</i>              | <i>GAS6</i>   | <i>SNW1</i>   |

|          |          |          |          |         |          |          |         |         |        |
|----------|----------|----------|----------|---------|----------|----------|---------|---------|--------|
| MMP27    | COL15A1  | KLK2     | ITGB7    | VTN     | F12      | ADGRG1   | TIMP3   | CIB1    | ABAT   |
| MMP26    | CCDC80   | EMILIN1  | HNRNPM   | FAP     | DEFA1    | FURIN    | WNT2    | PSMA6   | NOS2   |
| MMP16    | VWA1     | LAMC2    | FBN1     | GPC1    | FN1      | GDF15    | SEMA7A  | BCR     | PRKCD  |
| MMP15    | COL13A1  | COLQ     | ANTXR1   | CD151   | FGG      | BSG      | IL7     | NUMA1   | RPS3   |
| MMP25    | COL17A1  | ADAMTS3  | MUC17    | CLC     | GLG1     | HPN      | ANGPT4  | RUVBL2  | CDK1   |
| COMP     | COL5A3   | VCAN     | UTRN     | P3H2    | SPON2    | CAPN2    | PKHD1   | CSNK2B  | ROCK1  |
| MMP9     | HAPLN3   | LRIG3    | ADAM15   | FKBP10  | RTN4RL1  | TNFRSF1A | LRP1    | CCL21   | NRP1   |
| MMP14    | LRRTM4   | ICAM4    | CTSS     | RELL2   | GP1BA    | BST1     | CCN3    | ENG     | CD36   |
| MXRA7    | LRRN2    | SSC5D    | COL2A1   | AGRN    | FGA      | HRG      | ITGB1   | PKD1    | FGF2   |
| MMP10    | COL22A1  | DSPP     | COL7A1   | SPARC   | ITGA4    | SERPINF2 | LRRTM1  | HSPD1   | FOXC1  |
| MMP7     | EGFL6    | ADAMTS2  | COL4A3   | CEACAM6 | DCN      | FLRT1    | FLRT3   | SLC25A5 | CIQBP  |
| MMP13    | LAMC1    | ADAMTS8  | HTRA1    | ADTRP   | SH3PXD2A | LRRC32   | LRIG2   | UQC2    | PDGFRA |
| MMP11    | BGN      | WDR72    | A2M      | AHCTF1  | POMZP3   | COLEC12  | CCBE1   | ARL2BP  | FOXC2  |
| MXRA8    | ADAMTS19 | NTN5     | FBLN1    | ALDH1L2 | OC90     | TIMP4    | RECK    | ARL2    | NR2E1  |
| DMP1     | ADAMTS17 | ADAMDECI | LAMA5    | TOMM70  | VIPAS39  | PI3      | CCN4    | RAC1    | FOXO3  |
| MMP1     | TPSB2    | ADAM11   | LTBP1    | MPST    | NDUFAF7  | TNFRSF1B | SPINT2  | PRKCZ   | WT1    |
| UCMA     | MFAP4    | FGFBP3   | PLOD3    | GSR     | MTHFD2   | SH3PXD2B | PF4     | GPLD1   | RHOA   |
| MMP2     | COL27A1  | ATRNL1   | RRAS     | SSBP1   | MFAP1    | NCAM1    | HADH    | BCAS3   | FER    |
| MMP3     | COL11A2  | CAPNS2   | AMTN     | ECH1    | PMPCA    | CHI3L1   | SEMA3E  | SPINK5  | NLGN1  |
| MMP8     | COL4A6   | A1BG     | TMEFF1   | FH      | P3H4     | SERPING1 | FAM107A | DMTN    | TIAM1  |
| HPX      | COL8A2   | SERPINB8 | EXOC8    | PEX1    | TMEFF2   | SERPINB9 | WNT3    | ANXA1   | APP    |
| MMP12    | COL4A5   | OMD      | NTN3     | ALDH7A1 | SDC2     | CTSC     | ACAT1   | CSF1    | LRRK2  |
| FAM20A   | MIA      | FCN2     | ZP2      | ITGA2   | APLP1    | HSP90B1  | CAD     | PDGFB   | PARK7  |
| C17orf58 | NTN4     | ATRNL1   | ITGA9    | HAS1    | ANXA8    | KNG1     | GREM1   | ADIPOQ  | TLR4   |
| ABI3BP   | LAMC3    | PZP      | KIF9     | CTSK    | USH2A    | SERPINF1 | EFNA5   | TGFB2   | PTEN   |
| PODNL1   | SPARCL1  | ITIH1    | FLG      | KLK7    | SPP2     | CSPG4    | HMGCL   | ADAM8   | CTNNB1 |
| SBSPON   | ADAMTS10 | ANXA11   | SDC3     | PRG3    | DST      | APOC3    | ANXA2   | GSTP1   | BAX    |
| MARCOL   | PRELP    | CTSF     | NOXO1    | PTPRZ1  | ADAMTS12 | AHSG     | CDON    | SOX9    | ERBB4  |
| ANGPTL5  | LAMB3    | LGALS3BP | LMAN1L   | PLAU    | ANGPTL3  | CTSZ     | WASHC1  | JAG1    | TGFBR1 |
| OLFML2A  | TGM4     | F9       | ITIH5    | NPNT    | TNN      | APOH     | RAMP2   | CD3E    | SRF    |
| COL6A5   | ANGPTL1  | NTNG1    | MADCAM1  | RIC1    | FGB      | APCS     | TMEM38B | EDA     | TNF    |
| AMELY    | CPN2     | PCOLCE   | ALPL     | COL3A1  | COL1A1   | CD44     | ERBIN   | GNPAT   | PTK2B  |
| EMILIN3  | TGFBI    | MFGE8    | BMP1     | LRRC17  | CD180    | ITGB3    | CREB3L1 | ACAA1   | TP53   |
| EMILIN2  | COL6A3   | MMRN2    | GSTK1    | ELFN2   | ADAM12   | LGALS3   | NTN1    | HAT1    | BCL2   |
| PRG4     | COL6A1   | CS       | SERPINH1 | TRIL    | LRRTM3   | RGCC     | TCF15   | PCK2    | CAV1   |
| COL6A6   | TUFT1    | FBLN5    | PRSS2    | KERA    | ELFN1    | SDC4     | SLC2A10 | APOA1   | SNCA   |
| C6orf15  | MPZL3    | COL5A1   | CCL28    | LINGO1  | HAS2     | EPHX2    | IHH     | TGFB3   |        |
| GFOD2    | HAPLN4   | COL4A1   | LYVE1    | CCN6    | TIMP2    | CLIC4    | IDE     | EPHA3   |        |

|                |                |                 |                 |                  |                 |                 |                  |                |  |
|----------------|----------------|-----------------|-----------------|------------------|-----------------|-----------------|------------------|----------------|--|
| <i>NID2</i>    | <i>EMID1</i>   | <i>LTBP3</i>    | <i>BTD</i>      | <i>CRISP3</i>    | <i>CDH13</i>    | <i>KRT8</i>     | <i>CHMP1A</i>    | <i>NPPA</i>    |  |
| <i>LINGO4</i>  | <i>ST7</i>     | <i>LAMA3</i>    | <i>ALDH2</i>    | <i>GPM6B</i>     | <i>ITGA1</i>    | <i>CD63</i>     | <i>VDAC1</i>     | <i>PDGFA</i>   |  |
| <i>LRRC3C</i>  | <i>LTBP2</i>   | <i>MATN2</i>    | <i>GRHRP</i>    | <i>P3H1</i>      | <i>ACOT11</i>   | <i>ACSM1</i>    | <i>VIM</i>       | <i>ALOX5</i>   |  |
| <i>LINGO3</i>  | <i>ZP1</i>     | <i>MMRN1</i>    | <i>MDH2</i>     | <i>CARMIL2</i>   | <i>GARS1</i>    | <i>GOT2</i>     | <i>CFL1</i>      | <i>SLC9A1</i>  |  |
| <i>LRRC3B</i>  | <i>MEGF9</i>   | <i>EGFLAM</i>   | <i>CST3</i>     | <i>TTR</i>       | <i>SUCLA2</i>   | <i>CRYM</i>     | <i>ATP5F1B</i>   | <i>DLG1</i>    |  |
| <i>MATN4</i>   | <i>COL26A1</i> | <i>COLGALT1</i> | <i>CPB2</i>     | <i>PDPN</i>      | <i>NUDT9</i>    | <i>ACR</i>      | <i>SHMT2</i>     | <i>CLU</i>     |  |
| <i>OPTC</i>    | <i>CRELD1</i>  | <i>AMBN</i>     | <i>SMOC2</i>    | <i>DDR2</i>      | <i>NAXE</i>     | <i>ELANE</i>    | <i>BASP1</i>     | <i>SOD2</i>    |  |
| <i>FBN3</i>    | <i>CBLN4</i>   | <i>AEBP1</i>    | <i>SI00A10</i>  | <i>ITGBL1</i>    | <i>HSPE1</i>    | <i>ADAM9</i>    | <i>HSPA9</i>     | <i>SLIT2</i>   |  |
| <i>COL21A1</i> | <i>ELN</i>     | <i>COL1A2</i>   | <i>OTOA</i>     | <i>DEFB118</i>   | <i>PPFIA2</i>   | <i>SERPINE2</i> | <i>FABP1</i>     | <i>WNT7A</i>   |  |
| <i>COL23A1</i> | <i>CHAD</i>    | <i>MELTF</i>    | <i>STRCP1</i>   | <i>EPDR1</i>     | <i>FERMT3</i>   | <i>MINK1</i>    | <i>RIDA</i>      | <i>ACTN2</i>   |  |
| <i>COL24A1</i> | <i>OTOL1</i>   | <i>FSCN1</i>    | <i>ITGB8</i>    | <i>LCP1</i>      | <i>CFL2</i>     | <i>ETS1</i>     | <i>SPTBN4</i>    | <i>PDK2</i>    |  |
| <i>TINAGL1</i> | <i>ADAMTS4</i> | <i>ADAMTS20</i> | <i>KLKB1</i>    | <i>SERPINC1</i>  | <i>COASY</i>    | <i>THBS1</i>    | <i>ACTN3</i>     | <i>SLC39A8</i> |  |
| <i>HAPLN1</i>  | <i>ANGPTL7</i> | <i>LOXL1</i>    | <i>MYH11</i>    | <i>QSOX1</i>     | <i>TUFM</i>     | <i>PSAP</i>     | <i>ATP5F1A</i>   | <i>ITGA5</i>   |  |
| <i>TECTA</i>   | <i>PHLDB1</i>  | <i>THSD1</i>    | <i>DPP4</i>     | <i>FLRT2</i>     | <i>SERPINE1</i> | <i>ITGAV</i>    | <i>RUVBL1</i>    | <i>FOXF2</i>   |  |
| <i>FBLN2</i>   | <i>ITGA10</i>  | <i>IBSP</i>     | <i>ICAM3</i>    | <i>CAPN1</i>     | <i>NBL1</i>     | <i>CCL25</i>    | <i>ACTN1</i>     | <i>NOX1</i>    |  |
| <i>DPT</i>     | <i>FBN2</i>    | <i>ITGA11</i>   | <i>ITGAE</i>    | <i>ANOS1</i>     | <i>DAND5</i>    | <i>MYF5</i>     | <i>HNRNPA2B1</i> | <i>EXT1</i>    |  |
| <i>VWA2</i>    | <i>SCUBE3</i>  | <i>MUC4</i>     | <i>MSLN</i>     | <i>HDGF</i>      | <i>TMPRSS6</i>  | <i>DNAJC15</i>  | <i>IDH1</i>      | <i>ELF3</i>    |  |
| <i>HMCN2</i>   | <i>CTRB2</i>   | <i>ICAM5</i>    | <i>ITGAD</i>    | <i>GDF10</i>     | <i>CBLN1</i>    | <i>NUDT1</i>    | <i>SFRP1</i>     | <i>PDK4</i>    |  |
| <i>LAD1</i>    | <i>CTRB1</i>   | <i>SCUBE1</i>   | <i>CLASP2</i>   | <i>NDNF</i>      | <i>PRDX5</i>    | <i>OXCT1</i>    | <i>FASTKD2</i>   | <i>DNAJB6</i>  |  |
| <i>ANGPTL2</i> | <i>COL25A1</i> | <i>CRISPLD2</i> | <i>LTBP4</i>    | <i>GPC2</i>      | <i>KLK5</i>     | <i>FERMT1</i>   | <i>HLCS</i>      | <i>SIRT4</i>   |  |
| <i>TNXB</i>    | <i>ASPN</i>    | <i>CMA1</i>     | <i>NDP</i>      | <i>FCN3</i>      | <i>PTPRA</i>    | <i>APBB2</i>    | <i>SIRT5</i>     | <i>SIRT3</i>   |  |
| <i>COL12A1</i> | <i>MFAP2</i>   | <i>SPON1</i>    | <i>SRPX2</i>    | <i>WNT8A</i>     | <i>ITGA3</i>    | <i>HSPAIL</i>   | <i>OTC</i>       | <i>MDK</i>     |  |
| <i>THSD4</i>   | <i>LRRC15</i>  | <i>ADAM19</i>   | <i>ADAMTS13</i> | <i>SERPINB12</i> | <i>FGL2</i>     | <i>POMT1</i>    | <i>ICAM1</i>     | <i>CFLAR</i>   |  |
| <i>COL6A2</i>  | <i>CD248</i>   | <i>HRNR</i>     | <i>ADAMTS9</i>  | <i>C1QA</i>      | <i>LGALS1</i>   | <i>TXN2</i>     | <i>ANG</i>       | <i>RB1</i>     |  |
