# Supplementary material for: Prognostic and therapeutic implications of extracellular matrix associated gene signature in renal clear cell carcinoma
Source: PubMed Central journal article supplement (PMC8026590; doi:10.1038/s41598-021-86888-7), 2021-04-07
Supplement: 41598_2021_86888_MOESM4_ESM.pdf [file 41598_2021_86888_MOESM4_ESM.pdf]

## **Prognostic and therapeutic implications of extracellular matrix associated gene signature in renal clear cell carcinoma**

Pankaj Ahluwalia<sup>1</sup>, Meenakshi Ahluwalia<sup>1</sup>, Ashis K. Mondal<sup>1</sup>, Nikhil Sahajpal<sup>1</sup>, Vamsi Kota<sup>2</sup>, Mumtaz V. Rojjani<sup>1</sup>, Aryn M. Rojjani<sup>1</sup>, and Ravindra Kolhe<sup>1\*</sup>

<sup>1</sup> Department of Pathology, Medical College of Georgia, Augusta University, GA, U.S.A.

<sup>2</sup> Department of Medicine, Medical College of Georgia, Augusta University, GA, U.S.A.

\* Correspondence: rkolhe@augusta.edu; Tel.: (706)-721-2771; Fax :(706)-434-6053

**Supplementary Table 2:** Alterations of ECM genes using cBioportal in TCGA KIRC dataset (n = 510).

| Gene Symbol | OQL Line         | Num Samples Altered | Percent Samples Altered |
|-------------|------------------|---------------------|-------------------------|
| PLOD3       | PLOD3: EXP>=2;   | 65                  | 13.00%                  |
| VDAC1       | VDAC1: EXP>=2;   | 56                  | 11.00%                  |
| DNAJB6      | DNAJB6: EXP>=2;  | 51                  | 10.00%                  |
| CCL28       | CCL28: EXP>=2;   | 50                  | 10.00%                  |
| RARRES2     | RARRES2: EXP>=2; | 48                  | 9.00%                   |
| TGFBI       | TGFBI: EXP>=2;   | 47                  | 9.00%                   |
| ZP3         | ZP3: EXP>=2;     | 47                  | 9.00%                   |
| MMP24       | MMP24: EXP>=2;   | 46                  | 9.00%                   |
| TGM2        | TGM2: EXP>=2;    | 46                  | 9.00%                   |
| SSBP1       | SSBP1: EXP>=2;   | 44                  | 9.00%                   |
| ALDH7A1     | ALDH7A1: EXP>=2; | 44                  | 9.00%                   |
| GARS        | GARS: EXP>=2;    | 44                  | 9.00%                   |
| LRP1        | LRP1: EXP>=2;    | 44                  | 9.00%                   |
| SLC2A10     | SLC2A10: EXP>=2; | 44                  | 9.00%                   |
| SULF2       | SULF2: EXP>=2;   | 42                  | 8.00%                   |
| PEX1        | PEX1: EXP>=2;    | 42                  | 8.00%                   |
| MDH2        | MDH2: EXP>=2;    | 41                  | 8.00%                   |
| EFNA5       | EFNA5: EXP>=2;   | 41                  | 8.00%                   |
| ITGB8       | ITGB8: EXP>=2;   | 40                  | 8.00%                   |
| HDGF        | HDGF: EXP>=2;    | 40                  | 8.00%                   |
| RAC1        | RAC1: EXP>=2;    | 40                  | 8.00%                   |
| GNPAT       | GNPAT: EXP>=2;   | 39                  | 8.00%                   |
| ANXA2P2     | ANXA2P2: EXP>=2; | 38                  | 7.00%                   |
| TUFM        | TUFM: EXP>=2;    | 38                  | 7.00%                   |
| HSPD1       | HSPD1: EXP>=2;   | 38                  | 7.00%                   |
| COL23A1     | COL23A1: EXP>=2; | 37                  | 7.00%                   |
| KAZALD1     | KAZALD1: EXP>=2; | 37                  | 7.00%                   |
| EPDR1       | EPDR1: EXP>=2;   | 37                  | 7.00%                   |
| HSP90B1     | HSP90B1: EXP>=2; | 37                  | 7.00%                   |
| FER         | FER: EXP>=2;     | 37                  | 7.00%                   |
| SBSPON      | SBSPON: EXP>=2;  | 36                  | 7.00%                   |
| OPTC        | OPTC: EXP>=2;    | 36                  | 7.00%                   |
| HAPLN1      | HAPLN1: EXP>=2;  | 36                  | 7.00%                   |
| EDIL3       | EDIL3: EXP>=2;   | 36                  | 7.00%                   |
| WNT5B       | WNT5B: EXP>=2;   | 36                  | 7.00%                   |
| FGL2        | FGL2: EXP>=2;    | 36                  | 7.00%                   |

|           |                    |    |       |
|-----------|--------------------|----|-------|
| ADGRG1    | ADGRG1: EXP>=2;    | 36 | 7.00% |
| TNFRSF1A  | TNFRSF1A: EXP>=2;  | 36 | 7.00% |
| FERMT1    | FERMT1: EXP>=2;    | 36 | 7.00% |
| SHH       | SHH: EXP>=2;       | 36 | 7.00% |
| COL3A1    | COL3A1: EXP>=2;    | 35 | 7.00% |
| CTSZ      | CTSZ: EXP>=2;      | 35 | 7.00% |
| NUDT1     | NUDT1: EXP>=2;     | 35 | 7.00% |
| ARL2BP    | ARL2BP: EXP>=2;    | 35 | 7.00% |
| CAV2      | CAV2: EXP>=2;      | 35 | 7.00% |
| MXRA5     | MXRA5: EXP>=2;     | 34 | 7.00% |
| COL4A2    | COL4A2: EXP>=2;    | 34 | 7.00% |
| POSTN     | POSTN: EXP>=2;     | 34 | 7.00% |
| POMZP3    | POMZP3: EXP>=2;    | 34 | 7.00% |
| ANXA2     | ANXA2: EXP>=2;     | 34 | 7.00% |
| FASTKD2   | FASTKD2: EXP>=2;   | 34 | 7.00% |
| CAV1      | CAV1: EXP>=2;      | 34 | 7.00% |
| EGFLAM    | EGFLAM: EXP>=2;    | 33 | 6.00% |
| ELFN2     | ELFN2: EXP>=2;     | 33 | 6.00% |
| PRDX4     | PRDX4: EXP>=2;     | 33 | 6.00% |
| SHMT2     | SHMT2: EXP>=2;     | 33 | 6.00% |
| HLCS      | HLCS: EXP>=2;      | 33 | 6.00% |
| ITGA5     | ITGA5: EXP>=2;     | 33 | 6.00% |
| LRRK2     | LRRK2: EXP>=2;     | 33 | 6.00% |
| ASPN      | ASPN: EXP>=2;      | 32 | 6.00% |
| CS        | CS: EXP>=2;        | 32 | 6.00% |
| COL4A1    | COL4A1: EXP>=2;    | 32 | 6.00% |
| RRAS      | RRAS: EXP>=2;      | 32 | 6.00% |
| ALDH2     | ALDH2: EXP>=2;     | 32 | 6.00% |
| ANXA4     | ANXA4: EXP>=2;     | 32 | 6.00% |
| ITGA2     | ITGA2: EXP>=2;     | 32 | 6.00% |
| ANXA6     | ANXA6: EXP>=2;     | 32 | 6.00% |
| SERPINE1  | SERPINE1: EXP>=2;  | 32 | 6.00% |
| ITGA3     | ITGA3: EXP>=2;     | 32 | 6.00% |
| SIGLEC1   | SIGLEC1: EXP>=2;   | 32 | 6.00% |
| CHMP1A    | CHMP1A: EXP>=2;    | 32 | 6.00% |
| HNRNPA2B1 | HNRNPA2B1: EXP>=2; | 32 | 6.00% |
| PDGFA     | PDGFA: EXP>=2;     | 32 | 6.00% |
| PDK4      | PDK4: EXP>=2;      | 32 | 6.00% |
| KARS      | KARS: EXP>=2;      | 32 | 6.00% |

|          |                   |    |       |
|----------|-------------------|----|-------|
| SRC      | SRC: EXP>=2;      | 32 | 6.00% |
| MXRA7    | MXRA7: EXP>=2;    | 31 | 6.00% |
| ACAN     | ACAN: EXP>=2;     | 31 | 6.00% |
| ADAMTSL3 | ADAMTSL3: EXP>=2; | 31 | 6.00% |
| ADAMTS3  | ADAMTS3: EXP>=2;  | 31 | 6.00% |
| LGALS3BP | LGALS3BP: EXP>=2; | 31 | 6.00% |
| VASN     | VASN: EXP>=2;     | 31 | 6.00% |
| ADAM12   | ADAM12: EXP>=2;   | 31 | 6.00% |
| COASY    | COASY: EXP>=2;    | 31 | 6.00% |
| TIMP4    | TIMP4: EXP>=2;    | 31 | 6.00% |
| ITGB2    | ITGB2: EXP>=2;    | 31 | 6.00% |
| BMP2     | BMP2: EXP>=2;     | 31 | 6.00% |
| WT1      | WT1: EXP>=2;      | 31 | 6.00% |
| LRRC3B   | LRRC3B: EXP>=2;   | 30 | 6.00% |
| LGALS4   | LGALS4: EXP>=2;   | 30 | 6.00% |
| TSTA3    | TSTA3: EXP>=2;    | 30 | 6.00% |
| CST3     | CST3: EXP>=2;     | 30 | 6.00% |
| GDF10    | GDF10: EXP>=2;    | 30 | 6.00% |
| LOXL2    | LOXL2: EXP>=2;    | 30 | 6.00% |
| CRYM     | CRYM: EXP>=2;     | 30 | 6.00% |
| CD3E     | CD3E: EXP>=2;     | 30 | 6.00% |
| LAD1     | LAD1: EXP>=2;     | 29 | 6.00% |
| COL22A1  | COL22A1: EXP>=2;  | 29 | 6.00% |
| AEBP1    | AEBP1: EXP>=2;    | 29 | 6.00% |
| CTSS     | CTSS: EXP>=2;     | 29 | 6.00% |
| FAP      | FAP: EXP>=2;      | 29 | 6.00% |
| P3H2     | P3H2: EXP>=2;     | 29 | 6.00% |
| CCN4     | CCN4: EXP>=2;     | 29 | 6.00% |
| LGALS9   | LGALS9: EXP>=2;   | 29 | 6.00% |
| SOD1     | SOD1: EXP>=2;     | 29 | 6.00% |
| PTK2B    | PTK2B: EXP>=2;    | 29 | 6.00% |
