# Supplementary material for: Prognostic and therapeutic implications of extracellular matrix associated gene signature in renal clear cell carcinoma
Source: PubMed Central journal article supplement (PMC8026590; doi:10.1038/s41598-021-86888-7), 2021-04-07
Supplement: 41598_2021_86888_MOESM5_ESM.pdf [file 41598_2021_86888_MOESM5_ESM.pdf]

## **Prognostic and therapeutic implications of extracellular matrix associated gene signature in renal clear cell carcinoma**

Pankaj Ahluwalia<sup>1</sup>, Meenakshi Ahluwalia<sup>1</sup>, Ashis K. Mondal<sup>1</sup>, Nikhil Sahajpal<sup>1</sup>, Vamsi Kota<sup>2</sup>, Mumtaz V. Rojjani<sup>1</sup>, Aryn M. Rojjani<sup>1</sup>, and Ravindra Kolhe<sup>1\*</sup>

<sup>1</sup> Department of Pathology, Medical College of Georgia, Augusta University, GA, U.S.A.

<sup>2</sup> Department of Medicine, Medical College of Georgia, Augusta University, GA, U.S.A.

\* Correspondence: rkolhe@augusta.edu; Tel.: (706)-721-2771; Fax :(706)-434-6053

**Supplementary Table 3:** Survival analysis of ECM genes using cBioportal in TCGA KIRC dataset (n = 510).

| Gene Symbol | OQL Line           | Num Samples Altered | Percent Samples Altered | PFS (Log-rank) | OS (Log-rank) | DSS (Log-rank) | DFS (Log-rank) |
|-------------|--------------------|---------------------|-------------------------|----------------|---------------|----------------|----------------|
| NUDT1       | NUDT1: EXP>=2;     | 35                  | 0.07                    | 0.000000       | 0.000042      | 0.000000       | 0.396000       |
| SIGLEC1     | SIGLEC1: EXP>=2;   | 32                  | 0.06                    | 0.003083       | 0.000159      | 0.002584       | 0.022100       |
| LRP1        | LRP1: EXP>=2;      | 44                  | 0.09                    | 0.000061       | 0.000310      | 0.000025       | 0.949000       |
| LOXL2       | LOXL2: EXP>=2;     | 30                  | 0.06                    | 0.000005       | 0.000815      | 0.000001       | 0.725000       |
| SERPINE1    | SERPINE1: EXP>=2;  | 32                  | 0.06                    | 0.000197       | 0.005720      | 0.000102       | 0.477000       |
| PLOD3       | PLOD3: EXP>=2;     | 65                  | 0.13                    | 0.003759       | 0.008215      | 0.003305       | 0.266000       |
| ZP3         | ZP3: EXP>=2;       | 47                  | 0.09                    | 0.000002       | 0.010100      | 0.000012       | 0.489000       |
| RARRES2     | RARRES2: EXP>=2;   | 48                  | 0.09                    | 0.001234       | 0.018000      | 0.001376       | 0.906000       |
| TGM2        | TGM2: EXP>=2;      | 46                  | 0.09                    | 0.015600       | 0.019800      | 0.000677       | 0.176000       |
| COL3A1      | COL3A1: EXP>=2;    | 35                  | 0.07                    | 0.009221       | 0.033700      | 0.014800       | 0.307000       |
| ANXA4       | ANXA4: EXP>=2;     | 32                  | 0.06                    | 0.000012       | 0.036100      | 0.007233       | 0.004350       |
| POSTN       | POSTN: EXP>=2;     | 34                  | 0.07                    | 0.014700       | 0.043700      | 0.030800       | 0.516000       |
| HNRNPA2B1   | HNRNPA2B1: EXP>=2; | 32                  | 0.06                    | 0.000020       | 0.000000      | 0.000000       | 0.763000       |
| LGALS3BP    | LGALS3BP: EXP>=2;  | 31                  | 0.06                    | 0.000001       | 0.000012      | 0.000000       | 0.559000       |
| COL22A1     | COL22A1: EXP>=2;   | 29                  | 0.06                    | 0.000002       | 0.000028      | 0.000001       | 0.435000       |
| SRC         | SRC: EXP>=2;       | 32                  | 0.06                    | 0.000855       | 0.000028      | 0.000001       | 0.491000       |
| ANXA2P2     | ANXA2P2: EXP>=2;   | 38                  | 0.07                    | 0.000000       | 0.000078      | 0.000000       | 0.704000       |
| EFNA5       | EFNA5: EXP>=2;     | 41                  | 0.08                    | 0.000000       | 0.000082      | 0.000000       | 0.034200       |
| GARS        | GARS: EXP>=2;      | 44                  | 0.09                    | 0.000000       | 0.000124      | 0.000003       | 0.645000       |
| CCN4        | CCN4: EXP>=2;      | 29                  | 0.06                    | 0.001131       | 0.000237      | 0.001074       | 0.922000       |
| HSP90B1     | HSP90B1: EXP>=2;   | 37                  | 0.07                    | 0.000000       | 0.000500      | 0.000002       | 0.046900       |
| TNFRSF1A    | TNFRSF1A: EXP>=2;  | 36                  | 0.07                    | 0.000000       | 0.000590      | 0.000000       | 0.642000       |
| OPTC        | OPTC: EXP>=2;      | 36                  | 0.07                    | 0.198000       | 0.000813      | 0.047600       | 0.316000       |

|             |                     |    |      |          |          |          |          |
|-------------|---------------------|----|------|----------|----------|----------|----------|
| WNT5B       | WNT5B:<br>EXP>=2;   | 36 | 0.07 | 0.009201 | 0.001024 | 0.000316 | 0.790000 |
| MXRA5       | MXRA5:<br>EXP>=2;   | 34 | 0.07 | 0.000199 | 0.001160 | 0.000353 | 0.781000 |
| ANXA2       | ANXA2:<br>EXP>=2;   | 34 | 0.07 | 0.000011 | 0.001751 | 0.000002 | 0.903000 |
| SULF2       | SULF2: EXP>=2;      | 42 | 0.08 | 0.004177 | 0.001838 | 0.000026 | 0.676000 |
| RRAS        | RRAS: EXP>=2;       | 32 | 0.06 | 0.000003 | 0.001973 | 0.000068 | 0.731000 |
| GDF10       | GDF10: EXP>=2;      | 30 | 0.06 | 0.017900 | 0.003357 | 0.039800 | 0.005096 |
| PTK2B       | PTK2B: EXP>=2;      | 29 | 0.06 | 0.112000 | 0.004207 | 0.001129 | 0.661000 |
| COASY       | COASY:<br>EXP>=2;   | 31 | 0.06 | 0.238000 | 0.004982 | 0.005449 | 0.195000 |
| ADAM12      | ADAM12:<br>EXP>=2;  | 31 | 0.06 | 0.000334 | 0.008762 | 0.000112 | 0.272000 |
| PKD4        | PKD4: EXP>=2;       | 32 | 0.06 | 0.368000 | 0.011200 | 0.065600 | 0.622000 |
| WT1         | WT1: EXP>=2;        | 31 | 0.06 | 0.011200 | 0.019000 | 0.007564 | 0.534000 |
| SLC2A10     | SLC2A10:<br>EXP>=2; | 44 | 0.09 | 0.181000 | 0.029300 | 0.009072 | 0.311000 |
| ITGA3       | ITGA3: EXP>=2;      | 32 | 0.06 | 0.008317 | 0.032200 | 0.007755 | 0.472000 |
| VASN        | VASN: EXP>=2;       | 31 | 0.06 | 0.299000 | 0.034200 | 0.163000 | 0.319000 |
| SSBP1       | SSBP1: EXP>=2;      | 44 | 0.09 | 0.003413 | 0.034400 | 0.000370 | 0.663000 |
| ITGA2       | ITGA2: EXP>=2;      | 32 | 0.06 | 0.816000 | 0.039800 | 0.260000 | 0.166000 |
| P3H2        | P3H2: EXP>=2;       | 29 | 0.06 | 0.000079 | 0.042200 | 0.001206 | 0.507000 |
| DNAJB6      | DNAJB6:<br>EXP>=2;  | 51 | 0.1  | 0.000130 | 0.042900 | 0.002325 | 0.949000 |
| SBSPON      | SBSPON:<br>EXP>=2;  | 36 | 0.07 | 0.000567 | 0.049500 | 0.003332 | 0.359000 |
| HDGF        | HDGF: EXP>=2;       | 40 | 0.08 | 0.002804 | 0.056000 | 0.010600 | 0.651000 |
| ITGB2       | ITGB2: EXP>=2;      | 31 | 0.06 | 0.267000 | 0.077600 | 0.177000 | 0.029700 |
| EPDR1       | EPDR1: EXP>=2;      | 37 | 0.07 | 0.001403 | 0.078300 | 0.003252 | 0.874000 |
| ITGA5       | ITGA5: EXP>=2;      | 33 | 0.06 | 0.000142 | 0.082700 | 0.001016 | 0.302000 |
| ADAMTS<br>3 | ADAMTS3:<br>EXP>=2; | 31 | 0.06 | 0.034400 | 0.089100 | 0.795000 | 0.017500 |
| FAP         | FAP: EXP>=2;        | 29 | 0.06 | 0.037800 | 0.102000 | 0.085600 | 0.967000 |
| KAZALD<br>1 | KAZALD1:<br>EXP>=2; | 37 | 0.07 | 0.037100 | 0.108000 | 0.048900 | 0.729000 |
| TSTA3       | TSTA3: EXP>=2;      | 30 | 0.06 | 0.005213 | 0.113000 | 0.012900 | 0.893000 |

|         |                     |    |      |          |          |          |          |
|---------|---------------------|----|------|----------|----------|----------|----------|
| HLCS    | HLCS: EXP>=2;       | 33 | 0.06 | 0.583000 | 0.113000 | 0.542000 | 0.838000 |
| CRYM    | CRYM: EXP>=2;       | 30 | 0.06 | 0.374000 | 0.118000 | 0.047300 | 0.428000 |
| MMP24   | MMP24:<br>EXP>=2;   | 46 | 0.09 | 0.552000 | 0.128000 | 0.641000 | 0.831000 |
| CTSS    | CTSS: EXP>=2;       | 29 | 0.06 | 0.159000 | 0.132000 | 0.156000 | 0.566000 |
| RAC1    | RAC1: EXP>=2;       | 40 | 0.08 | 0.001018 | 0.134000 | 0.008401 | 0.436000 |
| HAPLN1  | HAPLN1:<br>EXP>=2;  | 36 | 0.07 | 0.001282 | 0.145000 | 0.024200 | 0.252000 |
| CD3E    | CD3E: EXP>=2;       | 30 | 0.06 | 0.209000 | 0.155000 | 0.192000 | 0.446000 |
| ALDH7A1 | ALDH7A1:<br>EXP>=2; | 44 | 0.09 | 0.338000 | 0.155000 | 0.331000 | 0.110000 |
| PEX1    | PEX1: EXP>=2;       | 42 | 0.08 | 0.120000 | 0.160000 | 0.406000 | 0.204000 |
| CHMP1A  | CHMP1A:<br>EXP>=2;  | 32 | 0.06 | 0.140000 | 0.172000 | 0.032800 | 0.226000 |
| CAV1    | CAV1: EXP>=2;       | 34 | 0.07 | 0.000493 | 0.172000 | 0.066400 | 0.061500 |
| SHMT2   | SHMT2: EXP>=2;      | 33 | 0.06 | 0.182000 | 0.175000 | 0.258000 | 0.092400 |
| KARS    | KARS: EXP>=2;       | 32 | 0.06 | 0.105000 | 0.182000 | 0.257000 | 0.630000 |
| FER     | FER: EXP>=2;        | 37 | 0.07 | 0.284000 | 0.190000 | 0.360000 | 0.459000 |
| COL23A1 | COL23A1:<br>EXP>=2; | 37 | 0.07 | 0.040000 | 0.200000 | 0.123000 | 0.320000 |
| TGFBI   | TGFBI: EXP>=2;      | 47 | 0.09 | 0.001741 | 0.225000 | 0.023900 | 0.014000 |
| LGALS9  | LGALS9:<br>EXP>=2;  | 29 | 0.06 | 0.005980 | 0.231000 | 0.070600 | 0.235000 |
| ELFN2   | ELFN2: EXP>=2;      | 33 | 0.06 | 0.833000 | 0.251000 | 0.716000 | 0.163000 |
| SOD1    | SOD1: EXP>=2;       | 29 | 0.06 | 0.041300 | 0.306000 | 0.083000 | 0.965000 |
| FERMT1  | FERMT1:<br>EXP>=2;  | 36 | 0.07 | 0.352000 | 0.306000 | 0.762000 | 0.141000 |
| CS      | CS: EXP>=2;         | 32 | 0.06 | 0.133000 | 0.310000 | 0.105000 | 0.221000 |
| ACAN    | ACAN: EXP>=2;       | 31 | 0.06 | 0.758000 | 0.336000 | 0.308000 | 0.150000 |
| ASPN    | ASPN: EXP>=2;       | 32 | 0.06 | 0.009322 | 0.359000 | 0.139000 | 0.254000 |
| LRRK2   | LRRK2: EXP>=2;      | 33 | 0.06 | 0.044200 | 0.390000 | 0.333000 | 0.320000 |
| CCL28   | CCL28: EXP>=2;      | 50 | 0.1  | 0.956000 | 0.413000 | 0.611000 | 0.262000 |
| EDIL3   | EDIL3: EXP>=2;      | 36 | 0.07 | 0.620000 | 0.508000 | 0.632000 | 0.076200 |
| ADAMTS3 | ADAMTS3:<br>EXP>=2; | 31 | 0.06 | 0.822000 | 0.531000 | 0.927000 | 0.391000 |

|             |                     |    |      |          |          |          |          |
|-------------|---------------------|----|------|----------|----------|----------|----------|
| ADGRG1      | ADGRG1:<br>EXP>=2;  | 36 | 0.07 | 0.458000 | 0.550000 | 0.810000 | 0.731000 |
| AEBP1       | AEBP1: EXP>=2;      | 29 | 0.06 | 0.371000 | 0.555000 | 0.567000 | 0.938000 |
| CAV2        | CAV2: EXP>=2;       | 35 | 0.07 | 0.235000 | 0.571000 | 0.437000 | 0.468000 |
| PRDX4       | PRDX4: EXP>=2;      | 33 | 0.06 | 0.044500 | 0.595000 | 0.034000 | 0.718000 |
| CTSZ        | CTSZ: EXP>=2;       | 35 | 0.07 | 0.680000 | 0.613000 | 0.660000 | 0.477000 |
| MDH2        | MDH2: EXP>=2;       | 41 | 0.08 | 0.962000 | 0.645000 | 0.980000 | 0.799000 |
| ITGB8       | ITGB8: EXP>=2;      | 40 | 0.08 | 0.490000 | 0.656000 | 0.676000 | 0.921000 |
| COL4A2      | COL4A2:<br>EXP>=2;  | 34 | 0.07 | 0.612000 | 0.672000 | 0.784000 | 0.444000 |
| FASTKD<br>2 | FASTKD2:<br>EXP>=2; | 34 | 0.07 | 0.019100 | 0.679000 | 0.106000 | 0.775000 |
| LRRC3B      | LRRC3B:<br>EXP>=2;  | 30 | 0.06 | 0.245000 | 0.691000 | 0.188000 | 0.397000 |
| COL4A1      | COL4A1:<br>EXP>=2;  | 32 | 0.06 | 0.408000 | 0.738000 | 0.794000 | 0.377000 |
| HSPD1       | HSPD1: EXP>=2;      | 38 | 0.07 | 0.793000 | 0.774000 | 0.440000 | 0.909000 |
| TIMP4       | TIMP4: EXP>=2;      | 31 | 0.06 | 0.181000 | 0.795000 | 0.696000 | 0.983000 |
| ARL2BP      | ARL2BP:<br>EXP>=2;  | 35 | 0.07 | 0.034100 | 0.799000 | 0.440000 | 0.237000 |
| FGL2        | FGL2: EXP>=2;       | 36 | 0.07 | 0.507000 | 0.835000 | 0.960000 | 0.339000 |
| CST3        | CST3: EXP>=2;       | 30 | 0.06 | 0.622000 | 0.852000 | 0.379000 | 0.268000 |
| VDAC1       | VDAC1:<br>EXP>=2;   | 56 | 0.11 | 0.012700 | 0.878000 | 0.510000 | 0.011600 |
| BMP2        | BMP2: EXP>=2;       | 31 | 0.06 | 0.401000 | 0.881000 | 0.491000 | 0.854000 |
| MXRA7       | MXRA7:<br>EXP>=2;   | 31 | 0.06 | 0.197000 | 0.884000 | 0.968000 | 0.724000 |
| LGALS4      | LGALS4:<br>EXP>=2;  | 30 | 0.06 | 0.158000 | 0.927000 | 0.328000 | 0.807000 |
| PDGFA       | PDGFA: EXP>=2;      | 32 | 0.06 | 0.592000 | 0.928000 | 0.552000 | 0.440000 |
| ANXA6       | ANXA6:<br>EXP>=2;   | 32 | 0.06 | 0.981000 | 0.939000 | 0.996000 | 0.357000 |
| TUFM        | TUFM: EXP>=2;       | 38 | 0.07 | 0.921000 | 0.942000 | 0.520000 | 0.294000 |
| ALDH2       | ALDH2: EXP>=2;      | 32 | 0.06 | 0.693000 | 0.944000 | 0.557000 | 0.666000 |
| GNPAT       | GNPAT:<br>EXP>=2;   | 39 | 0.08 | 0.119000 | 0.962000 | 0.477000 | 0.136000 |
| POMZP3      | POMZP3:<br>EXP>=2;  | 34 | 0.07 | 0.807000 | 0.972000 | 0.794000 | 0.681000 |
| EGFLAM      | EGFLAM:<br>EXP>=2;  | 33 | 0.06 | 0.304000 | 0.974000 | 0.301000 | 0.756000 |

|      |               |    |      |          |          |          |          |
|------|---------------|----|------|----------|----------|----------|----------|
| SHH  | SHH: EXP>=2;  | 36 | 0.07 | 0.905000 | 0.984000 | 0.877000 | 0.994000 |
| LAD1 | LAD1: EXP>=2; | 29 | 0.06 | 0.322000 | 0.994000 | 0.335000 | 0.971000 |
