# Supplementary material for: Prognostic and therapeutic implications of extracellular matrix associated gene signature in renal clear cell carcinoma
Source: PubMed Central journal article supplement (PMC8026590; doi:10.1038/s41598-021-86888-7), 2021-04-07
Supplement: 41598_2021_86888_MOESM6_ESM.pdf [file 41598_2021_86888_MOESM6_ESM.pdf]

## **Prognostic and therapeutic implications of extracellular matrix associated gene signature in renal clear cell carcinoma**

Pankaj Ahluwalia<sup>1</sup>, Meenakshi Ahluwalia<sup>1</sup>, Ashis K. Mondal<sup>1</sup>, Nikhil Sahajpal<sup>1</sup>, Vamsi Kota<sup>2</sup>, Mumtaz V. Rojiani<sup>1</sup>, Aryn M. Rojiani<sup>1</sup>, and Ravindra Kolhe<sup>1\*</sup>

<sup>1</sup> Department of Pathology, Medical College of Georgia, Augusta University, GA, U.S.A.

<sup>2</sup> Department of Medicine, Medical College of Georgia, Augusta University, GA, U.S.A.

\* Correspondence: rkolhe@augusta.edu; Tel.: (706)-721-2771; Fax :(706)-434-6053

**Supplementary Table 4:** Differentially expressed genes between two risk groups.

| Gene ID | Gene      | baseMean    | log2FoldChange | lfcSE    | stat     | pvalue   | padj     |
|---------|-----------|-------------|----------------|----------|----------|----------|----------|
| 785     | ITGB1BP3  | 335.4729484 | 10.3627916     | 1.178637 | 8.792184 | 1.47E-18 | 3.66E-17 |
| 1420    | KLK15     | 76.10125777 | 9.927385627    | 1.292855 | 7.678654 | 1.61E-14 | 2.22E-13 |
| 1033    | KLK3      | 34.06250894 | 9.815475576    | 1.185492 | 8.279663 | 1.24E-16 | 2.34E-15 |
| 398     | CFTR      | 973.6655222 | 8.724207943    | 0.868659 | 10.04331 | 9.83E-24 | 4.84E-22 |
| 1715    | BSND      | 162.0951966 | 8.475490637    | 1.163703 | 7.283205 | 3.26E-13 | 3.73E-12 |
| 4153    | SLC38A8   | 13.89975653 | 8.4704135      | 1.613467 | 5.24982  | 1.52E-07 | 7.19E-07 |
| 678     | NR0B2     | 133.6150616 | 8.14878715     | 0.897816 | 9.076233 | 1.12E-19 | 3.25E-18 |
| 1012    | FBN3      | 174.6528876 | 7.891082996    | 0.948153 | 8.322588 | 8.61E-17 | 1.67E-15 |
| 787     | HEPACAM1  | 145.2686421 | 7.882196625    | 0.89717  | 8.785618 | 1.56E-18 | 3.87E-17 |
| 1027    | CLDN8     | 284.3507112 | 7.671202534    | 0.925133 | 8.291998 | 1.11E-16 | 2.13E-15 |
| 562     | SFTPB     | 176.067388  | 7.65749331     | 0.811765 | 9.433135 | 3.98E-21 | 1.39E-19 |
| 1744    | LRRC52    | 11.69866368 | 7.653440085    | 1.055715 | 7.249531 | 4.18E-13 | 4.70E-12 |
| 410     | ATP6V0A4  | 2217.793229 | 7.644762826    | 0.763913 | 10.00738 | 1.41E-23 | 6.76E-22 |
| 394     | PVALB     | 1118.056516 | 7.508234217    | 0.74501  | 10.07804 | 6.91E-24 | 3.44E-22 |
| 753     | PART1     | 106.8539674 | 7.366615154    | 0.829244 | 8.883532 | 6.48E-19 | 1.69E-17 |
| 232     | ATP6V0D2  | 2818.781964 | 7.32854618     | 0.667891 | 10.97267 | 5.17E-28 | 4.37E-26 |
| 527     | CLNK      | 117.3548309 | 7.154939101    | 0.750981 | 9.527463 | 1.61E-21 | 5.99E-20 |
| 613     | TMEM213   | 1586.811102 | 7.081374579    | 0.763357 | 9.276628 | 1.75E-20 | 5.59E-19 |
| 2870    | LRRTM1    | 14.6938765  | 7.015238777    | 1.144496 | 6.129542 | 8.81E-10 | 6.02E-09 |
| 4781    | GPRC6A    | 19.50823766 | 6.990741234    | 1.428079 | 4.895207 | 9.82E-07 | 4.03E-06 |
| 242     | FOXI2     | 172.8596158 | 6.985200322    | 0.639552 | 10.92202 | 9.05E-28 | 7.33E-26 |
| 894     | DMRT2     | 593.7962897 | 6.967001576    | 0.815979 | 8.538216 | 1.36E-17 | 2.99E-16 |
| 909     | KLK1      | 508.8954724 | 6.900025202    | 0.811031 | 8.507721 | 1.77E-17 | 3.82E-16 |
| 1949    | LOC389493 | 21.20064074 | 6.830638173    | 0.97074  | 7.036525 | 1.97E-12 | 1.98E-11 |
| 37      | HS6ST3    | 275.8655878 | 6.828158086    | 0.507225 | 13.46178 | 2.63E-41 | 1.39E-38 |
| 4373    | MOG       | 10.55323877 | 6.789090956    | 1.326393 | 5.118462 | 3.08E-07 | 1.38E-06 |
| 102     | SLC26A7   | 1398.358078 | 6.754387491    | 0.549097 | 12.3009  | 8.96E-35 | 1.72E-32 |
| 286     | CLCNKB    | 1820.25338  | 6.725249465    | 0.631757 | 10.64531 | 1.83E-26 | 1.26E-24 |
| 1157    | KLK4      | 310.0364801 | 6.724200281    | 0.832282 | 8.079238 | 6.52E-16 | 1.10E-14 |
| 1453    | FAM184B   | 21.00865761 | 6.68971691     | 0.876511 | 7.632208 | 2.31E-14 | 3.11E-13 |
| 4070    | PNLIPRP3  | 10.7633977  | 6.638092904    | 1.253303 | 5.296479 | 1.18E-07 | 5.69E-07 |
| 1154    | RHCG      | 2918.983646 | 6.619039574    | 0.818665 | 8.085162 | 6.21E-16 | 1.05E-14 |
| 486     | TRIM63    | 216.1544357 | 6.590856874    | 0.681544 | 9.670474 | 4.03E-22 | 1.62E-20 |
| 3534    | CALCA     | 17.77067775 | 6.570397211    | 1.164047 | 5.644443 | 1.66E-08 | 9.19E-08 |
| 1795    | SYT10     | 49.13455778 | 6.547257482    | 0.90987  | 7.19582  | 6.21E-13 | 6.78E-12 |
| 547     | SLC4A1    | 1795.97597  | 6.362603008    | 0.672338 | 9.463392 | 2.98E-21 | 1.07E-19 |
| 6731    | ATP6V1G3  | 209.1881373 | 6.360999089    | 1.619171 | 3.928552 | 8.55E-05 | 0.000249 |
| 1884    | PLA2G4F   | 331.2688743 | 6.345789802    | 0.893565 | 7.101655 | 1.23E-12 | 1.28E-11 |
| 318     | TRIM50    | 218.9746822 | 6.257583128    | 0.598927 | 10.44799 | 1.50E-25 | 9.22E-24 |
| 946     | CWH43     | 103.7663882 | 6.255742616    | 0.74002  | 8.453474 | 2.83E-17 | 5.86E-16 |
| 3718    | FOXI1     | 1217.581029 | 6.230232945    | 1.127191 | 5.527218 | 3.25E-08 | 1.72E-07 |
| 2346    | CTNNA2    | 44.01784185 | 6.088368671    | 0.920945 | 6.611005 | 3.82E-11 | 3.19E-10 |
| 73      | UNC5D     | 148.4983357 | 6.079682985    | 0.481641 | 12.62285 | 1.58E-36 | 4.24E-34 |

|      |          |             |             |          |          |          |          |
|------|----------|-------------|-------------|----------|----------|----------|----------|
| 524  | KBTBD12  | 58.15854188 | 6.032903257 | 0.63289  | 9.532305 | 1.54E-21 | 5.75E-20 |
| 321  | STAP1    | 633.644774  | 6.00504452  | 0.57502  | 10.4432  | 1.57E-25 | 9.61E-24 |
| 194  | PAH      | 1962.601085 | 5.955173921 | 0.527013 | 11.29985 | 1.31E-29 | 1.33E-27 |
| 6710 | C8orf71  | 6.166553531 | 5.92866895  | 1.505845 | 3.937104 | 8.25E-05 | 0.000241 |
| 815  | FGF9     | 302.31359   | 5.871912709 | 0.673269 | 8.721496 | 2.75E-18 | 6.60E-17 |
| 793  | CTXN3    | 85.38282536 | 5.84527512  | 0.666536 | 8.769637 | 1.79E-18 | 4.43E-17 |
| 555  | AQP6     | 265.190141  | 5.839783963 | 0.618267 | 9.445401 | 3.54E-21 | 1.25E-19 |
| 367  | ATP6V1B1 | 1342.916715 | 5.826965863 | 0.571133 | 10.20248 | 1.93E-24 | 1.03E-22 |
| 2039 | RHBG     | 203.1411286 | 5.819085453 | 0.840665 | 6.922001 | 4.45E-12 | 4.28E-11 |
| 2705 | PAK7     | 17.4932273  | 5.758020153 | 0.917529 | 6.27557  | 3.48E-10 | 2.52E-09 |
| 93   | ERP27    | 1340.890683 | 5.734687205 | 0.462053 | 12.41131 | 2.27E-35 | 4.78E-33 |
| 1885 | ASB5     | 54.60322678 | 5.679490462 | 0.799911 | 7.100157 | 1.25E-12 | 1.30E-11 |
| 4228 | KLKP1    | 7.338375212 | 5.644760428 | 1.086617 | 5.194802 | 2.05E-07 | 9.50E-07 |
| 2903 | GCGR     | 95.0656568  | 5.6210038   | 0.920089 | 6.109194 | 1.00E-09 | 6.76E-09 |
| 915  | CYP4A22  | 6.995200575 | 5.515237567 | 0.649295 | 8.49419  | 1.99E-17 | 4.26E-16 |
| 207  | INPP5J   | 702.8525092 | 5.417560543 | 0.484232 | 11.18795 | 4.67E-29 | 4.42E-27 |
| 6990 | C10orf71 | 4.314311514 | 5.411286076 | 1.413264 | 3.828929 | 0.000129 | 0.000361 |
| 349  | SLC5A8   | 612.3511503 | 5.217185502 | 0.506847 | 10.29342 | 7.54E-25 | 4.24E-23 |
| 502  | CYP4A11  | 2340.527181 | 5.167973187 | 0.537879 | 9.608061 | 7.39E-22 | 2.89E-20 |
| 1303 | KRTAP5-8 | 28.58065454 | 5.092446773 | 0.647883 | 7.860138 | 3.84E-15 | 5.77E-14 |
| 575  | GGT6     | 119.9608711 | 5.069707943 | 0.539964 | 9.388974 | 6.06E-21 | 2.07E-19 |
| 311  | HMGCS2   | 1477.285038 | 5.061500359 | 0.483348 | 10.47174 | 1.16E-25 | 7.34E-24 |
| 2747 | PCP4     | 190.755522  | 5.01892797  | 0.804198 | 6.240907 | 4.35E-10 | 3.10E-09 |
| 625  | SLC22A8  | 88.80568044 | 4.957595894 | 0.536872 | 9.234225 | 2.60E-20 | 8.16E-19 |
| 1542 | RGS7     | 44.43229176 | 4.938373764 | 0.658015 | 7.504962 | 6.14E-14 | 7.81E-13 |
| 1052 | SLC13A2  | 44.80171837 | 4.926787181 | 0.597924 | 8.239821 | 1.72E-16 | 3.21E-15 |
| 921  | SLC9A2   | 164.2621468 | 4.923699267 | 0.579901 | 8.490589 | 2.06E-17 | 4.38E-16 |
| 937  | LYPD6B   | 55.33963874 | 4.919822893 | 0.580992 | 8.467972 | 2.50E-17 | 5.22E-16 |
| 3318 | SLC4A9   | 31.2778042  | 4.850406394 | 0.835516 | 5.805285 | 6.43E-09 | 3.80E-08 |
| 5236 | DNTT     | 4.610272794 | 4.775898942 | 1.025354 | 4.657807 | 3.20E-06 | 1.20E-05 |
| 343  | SLC22A24 | 9.797853194 | 4.761431271 | 0.461267 | 10.32251 | 5.57E-25 | 3.19E-23 |
| 984  | TMPRSS2  | 606.9574178 | 4.742862917 | 0.566806 | 8.3677   | 5.88E-17 | 1.17E-15 |
| 1001 | C9orf84  | 31.95903174 | 4.731954363 | 0.567222 | 8.342334 | 7.28E-17 | 1.43E-15 |
| 1076 | CYP17A1  | 175.3668595 | 4.691780361 | 0.572288 | 8.198283 | 2.44E-16 | 4.44E-15 |
| 1855 | CNTNAP5  | 82.97987611 | 4.690518649 | 0.657577 | 7.133032 | 9.82E-13 | 1.04E-11 |
| 6132 | HHATL    | 599.9663402 | 4.6854538   | 1.113775 | 4.206821 | 2.59E-05 | 8.28E-05 |
| 488  | C1orf168 | 73.64749184 | 4.676061094 | 0.483681 | 9.667656 | 4.14E-22 | 1.66E-20 |
| 2335 | GPR110   | 255.252372  | 4.637063899 | 0.700528 | 6.619383 | 3.61E-11 | 3.03E-10 |
| 12   | ENAM     | 261.5549193 | 4.599630033 | 0.308899 | 14.89042 | 3.80E-50 | 6.21E-47 |
| 522  | SLC13A1  | 437.5808905 | 4.484640003 | 0.470192 | 9.537885 | 1.46E-21 | 5.47E-20 |
| 6202 | PIK3C2G  | 9.582349049 | 4.481188566 | 1.073394 | 4.174783 | 2.98E-05 | 9.43E-05 |
| 1284 | FLJ42875 | 41.78140802 | 4.480282991 | 0.568438 | 7.88175  | 3.23E-15 | 4.93E-14 |
| 626  | SLC22A12 | 968.6450464 | 4.475595134 | 0.485182 | 9.224568 | 2.85E-20 | 8.91E-19 |
| 1585 | MAG      | 19.43873561 | 4.464060992 | 0.600008 | 7.440005 | 1.01E-13 | 1.25E-12 |
| 1812 | SLC22A6  | 679.7235055 | 4.463414342 | 0.621925 | 7.176774 | 7.14E-13 | 7.72E-12 |
| 287  | FREM1    | 155.8528217 | 4.398382528 | 0.413276 | 10.64272 | 1.89E-26 | 1.29E-24 |
| 6910 | SLC24A2  | 3.0205681   | 4.393336254 | 1.138333 | 3.859446 | 0.000114 | 0.000322 |

|       |           |             |             |          |          |          |          |
|-------|-----------|-------------|-------------|----------|----------|----------|----------|
| 579   | RANBP3L   | 51.49148582 | 4.355301819 | 0.464465 | 9.377033 | 6.79E-21 | 2.30E-19 |
| 2097  | CNTN3     | 164.0684001 | 4.35364568  | 0.635411 | 6.851699 | 7.30E-12 | 6.82E-11 |
| 420   | SLC22A13  | 29.25745169 | 4.343300102 | 0.436092 | 9.959593 | 2.29E-23 | 1.07E-21 |
| 386   | C15orf59  | 170.2756633 | 4.33444853  | 0.429117 | 10.10086 | 5.48E-24 | 2.78E-22 |
| 370   | SLC9A3    | 170.7564158 | 4.322790463 | 0.424605 | 10.18073 | 2.42E-24 | 1.28E-22 |
| 600   | TMEM174   | 315.4056023 | 4.32077302  | 0.463767 | 9.316685 | 1.20E-20 | 3.92E-19 |
| 3000  | PCGEM1    | 5.180821599 | 4.295376576 | 0.71208  | 6.032152 | 1.62E-09 | 1.06E-08 |
| 10547 | ODAM      | 7.39530022  | 4.291716152 | 1.749066 | 2.453719 | 0.014139 | 0.026276 |
| 554   | GCOM1     | 376.0417069 | 4.254779371 | 0.450292 | 9.448924 | 3.42E-21 | 1.21E-19 |
| 8971  | C11orf53  | 2.006528004 | 4.229231099 | 1.398886 | 3.023285 | 0.0025   | 0.005463 |
| 636   | TCL6      | 48.93680545 | 4.226595613 | 0.459467 | 9.198903 | 3.62E-20 | 1.11E-18 |
| 3182  | SLC6A18   | 119.4365504 | 4.218928751 | 0.715883 | 5.893324 | 3.79E-09 | 2.33E-08 |
| 1893  | OR1L8     | 6.021737976 | 4.174007853 | 0.588567 | 7.091816 | 1.32E-12 | 1.37E-11 |
| 2147  | MAPK4     | 56.15605846 | 4.173186027 | 0.61278  | 6.810255 | 9.74E-12 | 8.89E-11 |
| 261   | TMEM38A   | 246.8874231 | 4.123105919 | 0.382419 | 10.78166 | 4.20E-27 | 3.16E-25 |
| 875   | REN       | 1117.571827 | 4.113441742 | 0.479411 | 8.580196 | 9.47E-18 | 2.12E-16 |
| 873   | SLC10A2   | 489.0691868 | 4.110851931 | 0.478272 | 8.595224 | 8.31E-18 | 1.87E-16 |
| 8573  | MUCL1     | 3.491663262 | 4.10991657  | 1.291665 | 3.181876 | 0.001463 | 0.003346 |
| 4141  | STXBP5L   | 9.430101992 | 4.087977968 | 0.777395 | 5.258558 | 1.45E-07 | 6.87E-07 |
| 1438  | G6PC      | 206.4078206 | 4.058424201 | 0.530621 | 7.64845  | 2.03E-14 | 2.77E-13 |
| 550   | ELMOD1    | 65.50382363 | 4.052617195 | 0.428516 | 9.457332 | 3.16E-21 | 1.13E-19 |
| 10515 | 43901     | 1.859396024 | 4.051412727 | 1.642735 | 2.466261 | 0.013653 | 0.025451 |
| 805   | LOC388387 | 208.2619085 | 4.027957763 | 0.460574 | 8.74551  | 2.22E-18 | 5.41E-17 |
| 993   | SCGN      | 673.0436517 | 3.999427017 | 0.47854  | 8.357559 | 6.40E-17 | 1.26E-15 |
| 556   | HAO2      | 489.9675818 | 3.987724529 | 0.422255 | 9.443876 | 3.59E-21 | 1.27E-19 |
| 963   | CRIL      | 39.59945592 | 3.985202501 | 0.473056 | 8.424386 | 3.63E-17 | 7.38E-16 |
| 2877  | C13orf35  | 2.951801972 | 3.983780767 | 0.650393 | 6.125187 | 9.06E-10 | 6.17E-09 |
| 6245  | SLC9A4    | 21.56148001 | 3.955732865 | 0.95174  | 4.156318 | 3.23E-05 | 0.000102 |
| 2429  | LPPR1     | 72.47995599 | 3.946244641 | 0.603875 | 6.534868 | 6.37E-11 | 5.14E-10 |
| 3089  | C4BPB     | 14.42420692 | 3.939967287 | 0.65989  | 5.970641 | 2.36E-09 | 1.50E-08 |
| 2543  | SH3GL2    | 141.0014649 | 3.935028215 | 0.612047 | 6.429296 | 1.28E-10 | 9.88E-10 |
| 3778  | PGPEP1L   | 3.498045095 | 3.929345153 | 0.716007 | 5.487855 | 4.07E-08 | 2.11E-07 |
| 7317  | CNGB3     | 2.036770034 | 3.929017478 | 1.063764 | 3.693503 | 0.000221 | 0.000593 |
| 9073  | LOC400794 | 1.543917818 | 3.910158602 | 1.308236 | 2.988878 | 0.0028   | 0.006049 |
| 7994  | C4orf51   | 1.539590658 | 3.905660664 | 1.144654 | 3.412089 | 0.000645 | 0.001581 |
| 4916  | OVCH2     | 4.823824507 | 3.88398499  | 0.806081 | 4.818355 | 1.45E-06 | 5.77E-06 |
| 3465  | FAM83B    | 27.80209918 | 3.880832443 | 0.681111 | 5.6978   | 1.21E-08 | 6.87E-08 |
| 2008  | CLVS2     | 2.050795077 | 3.872048917 | 0.557178 | 6.949398 | 3.67E-12 | 3.58E-11 |
| 2864  | MSLN      | 865.1259724 | 3.849678482 | 0.627729 | 6.132709 | 8.64E-10 | 5.91E-09 |
| 9020  | SPACA1    | 1.410017701 | 3.844818641 | 1.279691 | 3.00449  | 0.00266  | 0.005781 |
| 672   | TMED6     | 291.1820074 | 3.827988281 | 0.420915 | 9.094443 | 9.51E-20 | 2.77E-18 |
| 2422  | SLC34A1   | 161.0582612 | 3.825224169 | 0.58502  | 6.538621 | 6.21E-11 | 5.02E-10 |
| 3978  | SCRT1     | 3.194526104 | 3.792148903 | 0.70821  | 5.354552 | 8.58E-08 | 4.23E-07 |
| 306   | MYRIP     | 311.1058537 | 3.784985773 | 0.359809 | 10.51942 | 7.03E-26 | 4.50E-24 |
| 2517  | TRIM71    | 10.79421347 | 3.782355142 | 0.586631 | 6.447586 | 1.14E-10 | 8.85E-10 |
| 4221  | VWA5B1    | 11.7626759  | 3.76440082  | 0.724157 | 5.19832  | 2.01E-07 | 9.34E-07 |
| 333   | C1orf95   | 168.9518957 | 3.739079169 | 0.359878 | 10.38984 | 2.76E-25 | 1.62E-23 |

|      |           |             |             |          |          |          |          |
|------|-----------|-------------|-------------|----------|----------|----------|----------|
| 1363 | SIM1      | 140.8424477 | 3.738352286 | 0.480937 | 7.773061 | 7.66E-15 | 1.10E-13 |
| 2764 | UPF0639   | 8.621070332 | 3.726825321 | 0.598651 | 6.225374 | 4.80E-10 | 3.41E-09 |
| 3368 | TPTE2P3   | 2.569422143 | 3.707561244 | 0.642881 | 5.767102 | 8.06E-09 | 4.69E-08 |
| 3090 | TMEM61    | 62.61763774 | 3.701965206 | 0.620067 | 5.970269 | 2.37E-09 | 1.50E-08 |
| 418  | TMEM72    | 106.3562313 | 3.686999049 | 0.37009  | 9.962433 | 2.23E-23 | 1.04E-21 |
| 1225 | PACRG     | 108.2061736 | 3.682183919 | 0.461137 | 7.985003 | 1.41E-15 | 2.25E-14 |
| 538  | HSD11B2   | 3298.418496 | 3.649041264 | 0.383956 | 9.503793 | 2.02E-21 | 7.37E-20 |
| 2489 | SMOC1     | 551.4072258 | 3.63935186  | 0.561529 | 6.481152 | 9.10E-11 | 7.17E-10 |
| 2832 | SLC6A19   | 1023.847081 | 3.636753269 | 0.590123 | 6.162705 | 7.15E-10 | 4.95E-09 |
| 85   | C1orf210  | 168.8107311 | 3.633491404 | 0.290369 | 12.51337 | 6.31E-36 | 1.45E-33 |
| 64   | AGPAT9    | 644.7315537 | 3.632985909 | 0.282825 | 12.84533 | 9.14E-38 | 2.80E-35 |
| 206  | IRF6      | 301.9202893 | 3.622390885 | 0.323696 | 11.19072 | 4.53E-29 | 4.31E-27 |
| 817  | NEURL     | 65.18892073 | 3.621551787 | 0.415457 | 8.717039 | 2.86E-18 | 6.85E-17 |
| 1822 | TAF7L     | 11.68605954 | 3.620281994 | 0.504906 | 7.170204 | 7.49E-13 | 8.06E-12 |
| 8398 | LHX9      | 3.214009385 | 3.616016045 | 1.112888 | 3.249219 | 0.001157 | 0.002701 |
| 1588 | SERPINA7  | 6.405541611 | 3.603873567 | 0.484442 | 7.439229 | 1.01E-13 | 1.25E-12 |
| 1490 | FAM70A    | 1045.070736 | 3.598299397 | 0.474395 | 7.58503  | 3.32E-14 | 4.37E-13 |
| 2413 | OXGR1     | 27.21320611 | 3.596441676 | 0.549388 | 6.546268 | 5.90E-11 | 4.79E-10 |
| 2437 | EPN3      | 64.41652135 | 3.59050572  | 0.550304 | 6.524581 | 6.82E-11 | 5.48E-10 |
| 5826 | C1orf64   | 6.747295716 | 3.577277717 | 0.820439 | 4.360202 | 1.30E-05 | 4.37E-05 |
| 1369 | DUSP15    | 269.7487528 | 3.572361171 | 0.460027 | 7.765552 | 8.13E-15 | 1.16E-13 |
| 3246 | GRHL2     | 58.56422976 | 3.566801437 | 0.609311 | 5.853829 | 4.80E-09 | 2.90E-08 |
| 707  | MCOLN3    | 117.7949776 | 3.559506491 | 0.395568 | 8.998472 | 2.29E-19 | 6.35E-18 |
| 2355 | LRRC14B   | 54.97651531 | 3.558844796 | 0.539078 | 6.601724 | 4.06E-11 | 3.38E-10 |
| 601  | LOC153328 | 25.06786296 | 3.543098239 | 0.380489 | 9.311951 | 1.26E-20 | 4.09E-19 |
| 7018 | SPINK7    | 9.215063162 | 3.534951242 | 0.926449 | 3.815593 | 0.000136 | 0.000379 |
| 8729 | PLA2G3    | 2.006232686 | 3.514832053 | 1.127983 | 3.116032 | 0.001833 | 0.004116 |
| 296  | TRPM3     | 122.1622593 | 3.494082889 | 0.330267 | 10.57958 | 3.71E-26 | 2.45E-24 |
| 8977 | KRT20     | 19.16749618 | 3.471519115 | 1.149055 | 3.021194 | 0.002518 | 0.005498 |
| 7191 | SLC6A2    | 4.30090381  | 3.456160291 | 0.921924 | 3.748857 | 0.000178 | 0.000484 |
| 34   | WDR72     | 1704.114801 | 3.451112109 | 0.255896 | 13.48637 | 1.88E-41 | 1.08E-38 |
| 6668 | TTR       | 82.87874356 | 3.436733445 | 0.86903  | 3.954678 | 7.66E-05 | 0.000225 |
| 3487 | THRSP     | 69.71545357 | 3.398564132 | 0.598003 | 5.683186 | 1.32E-08 | 7.43E-08 |
| 6536 | CHIA      | 3.596961884 | 3.393533618 | 0.846265 | 4.010015 | 6.07E-05 | 0.000182 |
| 2975 | SLC12A1   | 238.1576091 | 3.388738065 | 0.559945 | 6.051908 | 1.43E-09 | 9.43E-09 |
| 2104 | F7        | 14.73096932 | 3.385897315 | 0.494657 | 6.844935 | 7.65E-12 | 7.13E-11 |
| 125  | SLC27A2   | 806.1793389 | 3.383010289 | 0.282898 | 11.95842 | 5.87E-33 | 9.20E-31 |
| 2033 | TFCP2L1   | 1975.935555 | 3.361822045 | 0.485479 | 6.92475  | 4.37E-12 | 4.21E-11 |
| 9412 | SPATS1    | 1.895110679 | 3.360128952 | 1.177684 | 2.853166 | 0.004329 | 0.009015 |
| 640  | GBA3      | 1291.365053 | 3.357041153 | 0.365123 | 9.194267 | 3.78E-20 | 1.16E-18 |
| 914  | MUC20     | 3183.098801 | 3.344670516 | 0.393729 | 8.494845 | 1.98E-17 | 4.25E-16 |
| 193  | OXCT1     | 2103.977645 | 3.343956113 | 0.295898 | 11.30106 | 1.30E-29 | 1.32E-27 |
| 1047 | ELAVL2    | 69.22728832 | 3.337749263 | 0.404911 | 8.243164 | 1.68E-16 | 3.14E-15 |
| 1971 | SPSB4     | 32.81224602 | 3.336462429 | 0.476643 | 6.999923 | 2.56E-12 | 2.55E-11 |
| 2941 | MLNR      | 2.107486069 | 3.333502247 | 0.54861  | 6.076268 | 1.23E-09 | 8.20E-09 |
| 361  | LHFPL3    | 9.207697745 | 3.331567876 | 0.325618 | 10.23152 | 1.43E-24 | 7.78E-23 |
| 5073 | ATP4B     | 2.375439764 | 3.323090135 | 0.701742 | 4.73549  | 2.19E-06 | 8.44E-06 |

|       |           |             |             |          |          |          |          |
|-------|-----------|-------------|-------------|----------|----------|----------|----------|
| 2607  | NRK       | 82.63028056 | 3.322732136 | 0.521519 | 6.371263 | 1.87E-10 | 1.41E-09 |
| 8020  | PIP       | 7.44501202  | 3.321220889 | 0.975617 | 3.404227 | 0.000664 | 0.001622 |
| 6071  | SVOPL     | 13.57227541 | 3.316826184 | 0.78303  | 4.235885 | 2.28E-05 | 7.35E-05 |
| 8242  | DPP10     | 3.924298042 | 3.316803181 | 1.000583 | 3.314871 | 0.000917 | 0.00218  |
| 5414  | AGXT2L1   | 20.26574169 | 3.310469913 | 0.72612  | 4.559125 | 5.14E-06 | 1.86E-05 |
| 359   | SLC2A4    | 212.4009748 | 3.304509172 | 0.32291  | 10.23354 | 1.40E-24 | 7.66E-23 |
| 1931  | RPS6KA6   | 40.52011356 | 3.292801992 | 0.46671  | 7.055344 | 1.72E-12 | 1.75E-11 |
| 2197  | CASR      | 99.33813339 | 3.283071421 | 0.485656 | 6.760075 | 1.38E-11 | 1.23E-10 |
| 2587  | ALDOB     | 2934.379265 | 3.280991112 | 0.513162 | 6.393677 | 1.62E-10 | 1.23E-09 |
| 3085  | TRIM67    | 15.47711823 | 3.268649587 | 0.547229 | 5.973092 | 2.33E-09 | 1.48E-08 |
| 1643  | VIL1      | 367.2076198 | 3.264939342 | 0.44296  | 7.370736 | 1.70E-13 | 2.02E-12 |
| 366   | PRLR      | 818.3840597 | 3.26225584  | 0.319619 | 10.20671 | 1.85E-24 | 9.91E-23 |
| 675   | IQSEC3    | 207.9232795 | 3.257675563 | 0.358555 | 9.085579 | 1.03E-19 | 3.00E-18 |
| 1031  | KIT       | 1581.848357 | 3.25068331  | 0.392451 | 8.283029 | 1.20E-16 | 2.28E-15 |
| 433   | PPARGC1A  | 1587.553812 | 3.247248561 | 0.32844  | 9.886874 | 4.75E-23 | 2.15E-21 |
| 409   | FREM2     | 559.035177  | 3.244329682 | 0.324011 | 10.01304 | 1.34E-23 | 6.40E-22 |
| 8289  | CT62      | 1.915330245 | 3.243928942 | 0.983723 | 3.297605 | 0.000975 | 0.002306 |
| 1476  | NTN1      | 329.1283144 | 3.241157028 | 0.426409 | 7.601049 | 2.94E-14 | 3.90E-13 |
| 4652  | MCCD1     | 25.42227233 | 3.234252304 | 0.652135 | 4.959485 | 7.07E-07 | 2.98E-06 |
| 794   | OGDHL     | 3132.929713 | 3.233309087 | 0.368722 | 8.768969 | 1.80E-18 | 4.45E-17 |
| 160   | LIN7A     | 293.4700578 | 3.22595117  | 0.27831  | 11.59122 | 4.57E-31 | 5.59E-29 |
| 4366  | PRMT8     | 4.561745312 | 3.224282253 | 0.629494 | 5.122024 | 3.02E-07 | 1.36E-06 |
| 9749  | NTSR2     | 2.191256707 | 3.200261607 | 1.171018 | 2.732888 | 0.006278 | 0.012623 |
| 1107  | CHL1      | 269.2854481 | 3.196446173 | 0.392093 | 8.152262 | 3.57E-16 | 6.32E-15 |
| 1267  | TOX3      | 172.4879762 | 3.195329795 | 0.404323 | 7.902912 | 2.72E-15 | 4.22E-14 |
| 10781 | RPL13AP1  | 0.951226895 | 3.195225752 | 1.349282 | 2.368094 | 0.01788  | 0.032508 |
| 1896  | FTCD      | 348.954957  | 3.192979255 | 0.450308 | 7.090661 | 1.33E-12 | 1.38E-11 |
| 7735  | MYH8      | 142.9449603 | 3.188638775 | 0.904884 | 3.523809 | 0.000425 | 0.001078 |
| 3066  | ASB17     | 1.045480301 | 3.187868018 | 0.53242  | 5.987501 | 2.13E-09 | 1.36E-08 |
| 3169  | DC1001289 | 5.167941646 | 3.179560794 | 0.53836  | 5.906014 | 3.50E-09 | 2.17E-08 |
| 10643 | C12orf77  | 1.189672289 | 3.175141878 | 1.313949 | 2.416487 | 0.015671 | 0.028861 |
| 4243  | CLCNKA    | 435.9056092 | 3.1690982   | 0.611139 | 5.185564 | 2.15E-07 | 9.95E-07 |
| 2032  | SLC5A1    | 1228.303931 | 3.168860583 | 0.457566 | 6.925473 | 4.35E-12 | 4.19E-11 |
| 7306  | FRMD7     | 3.849102103 | 3.168091506 | 0.856675 | 3.698125 | 0.000217 | 0.000583 |
| 4101  | BMP7      | 66.58365547 | 3.14467965  | 0.595495 | 5.280779 | 1.29E-07 | 6.15E-07 |
| 1065  | SLC16A7   | 306.2946834 | 3.139910505 | 0.382047 | 8.218642 | 2.06E-16 | 3.79E-15 |
| 2744  | FER1L6    | 11.80687732 | 3.135123909 | 0.502295 | 6.241599 | 4.33E-10 | 3.09E-09 |
| 1199  | PPM1E     | 86.72267966 | 3.129437137 | 0.390463 | 8.014688 | 1.10E-15 | 1.81E-14 |
| 6216  | UGT2A1    | 2.102356029 | 3.126505744 | 0.749714 | 4.170266 | 3.04E-05 | 9.59E-05 |
| 6131  | KLHL34    | 2.439840909 | 3.126186817 | 0.743039 | 4.207301 | 2.58E-05 | 8.26E-05 |
| 4866  | SLC22A10  | 0.95526035  | 3.124456507 | 0.643702 | 4.85389  | 1.21E-06 | 4.88E-06 |
| 4791  | GABRG1    | 5.971060773 | 3.12285332  | 0.638527 | 4.890717 | 1.00E-06 | 4.11E-06 |
| 7639  | NXPH2     | 7.424869371 | 3.119134137 | 0.874929 | 3.565014 | 0.000364 | 0.000934 |
| 11281 | FXVD4     | 10.86741866 | 3.115278565 | 1.425567 | 2.185291 | 0.028868 | 0.050158 |
| 7255  | LCN8      | 1.425335718 | 3.111816285 | 0.835792 | 3.723193 | 0.000197 | 0.000531 |
| 9795  | TMPRSS7   | 1.597383257 | 3.092092483 | 1.137567 | 2.718163 | 0.006565 | 0.013136 |
| 1005  | FAM189A2  | 158.8797753 | 3.087305674 | 0.370236 | 8.338745 | 7.51E-17 | 1.46E-15 |

|       |           |             |             |          |          |          |          |
|-------|-----------|-------------|-------------|----------|----------|----------|----------|
| 4988  | ABCB5     | 29.49810517 | 3.084424803 | 0.645224 | 4.780391 | 1.75E-06 | 6.88E-06 |
| 2435  | LRRN1     | 41.82664379 | 3.08302701  | 0.472427 | 6.52593  | 6.76E-11 | 5.44E-10 |
| 635   | ANO4      | 259.8153549 | 3.076870452 | 0.334361 | 9.202242 | 3.51E-20 | 1.08E-18 |
| 6241  | ZNF804B   | 2.139032594 | 3.051371432 | 0.733785 | 4.158399 | 3.20E-05 | 0.000101 |
| 654   | ESRRG     | 456.5933319 | 3.047785423 | 0.332751 | 9.159349 | 5.22E-20 | 1.56E-18 |
| 1976  | HAP1      | 15.78542558 | 3.044396746 | 0.435279 | 6.994132 | 2.67E-12 | 2.65E-11 |
| 2010  | ANO5      | 199.6710371 | 3.022618844 | 0.435044 | 6.947845 | 3.71E-12 | 3.62E-11 |
| 3958  | SLC14A2   | 13.4317311  | 3.020842908 | 0.562366 | 5.371665 | 7.80E-08 | 3.86E-07 |
| 10722 | OTC       | 0.804340932 | 3.018860922 | 1.263716 | 2.388876 | 0.0169   | 0.030895 |
| 7870  | ACOT12    | 3.539483244 | 3.018450268 | 0.871331 | 3.464182 | 0.000532 | 0.001325 |
| 745   | PLCG2     | 2787.973709 | 3.017438536 | 0.338877 | 8.904223 | 5.38E-19 | 1.41E-17 |
| 3535  | SPAG6     | 10.48924901 | 3.017001015 | 0.53453  | 5.644209 | 1.66E-08 | 9.20E-08 |
| 1819  | PCK1      | 3038.348173 | 3.01251731  | 0.420013 | 7.172433 | 7.37E-13 | 7.94E-12 |
| 582   | SLC16A9   | 2025.974841 | 3.011116143 | 0.32131  | 9.371386 | 7.16E-21 | 2.41E-19 |
| 2662  | GRM3      | 5.409409997 | 3.010041698 | 0.476373 | 6.318662 | 2.64E-10 | 1.94E-09 |
| 694   | BSPRY     | 121.5399467 | 2.98279266  | 0.330198 | 9.033342 | 1.67E-19 | 4.70E-18 |
| 13058 | GJD2      | 0.743383891 | 2.981088629 | 1.833348 | 1.626036 | 0.103942 | 0.156025 |
| 3446  | GPR143    | 577.125642  | 2.976254631 | 0.521252 | 5.709815 | 1.13E-08 | 6.43E-08 |
| 2026  | C4orf49   | 238.9833081 | 2.97523252  | 0.42915  | 6.932842 | 4.12E-12 | 3.99E-11 |
| 2735  | C19orf46  | 19.84295898 | 2.97488507  | 0.475844 | 6.251812 | 4.06E-10 | 2.91E-09 |
| 11552 | KRTAP5-3  | 0.862610049 | 2.974567269 | 1.418488 | 2.096999 | 0.035994 | 0.061067 |
| 2784  | SV2B      | 260.5319452 | 2.97110677  | 0.478497 | 6.209254 | 5.32E-10 | 3.75E-09 |
| 7390  | PLG       | 339.3898076 | 2.968499781 | 0.810833 | 3.661052 | 0.000251 | 0.000666 |
| 8442  | C20orf151 | 1.475580098 | 2.963815179 | 0.917458 | 3.230463 | 0.001236 | 0.002869 |
| 4550  | DPP6      | 53.3163099  | 2.96294103  | 0.591494 | 5.009249 | 5.46E-07 | 2.35E-06 |
| 3253  | LCN10     | 55.96674786 | 2.961606007 | 0.506243 | 5.850171 | 4.91E-09 | 2.96E-08 |
| 1635  | ZNF385B   | 283.0215416 | 2.951906737 | 0.399871 | 7.382146 | 1.56E-13 | 1.87E-12 |
| 638   | NPR3      | 686.6934156 | 2.950396271 | 0.320774 | 9.197748 | 3.66E-20 | 1.12E-18 |
| 9160  | CHRNA2    | 1.222416349 | 2.939326526 | 0.994478 | 2.955647 | 0.00312  | 0.006677 |
| 4398  | SEZ6L     | 7.038487713 | 2.936334246 | 0.575235 | 5.104584 | 3.32E-07 | 1.48E-06 |
| 497   | LDHD      | 414.5356975 | 2.934579494 | 0.304611 | 9.633844 | 5.75E-22 | 2.27E-20 |
| 316   | C11orf92  | 217.560016  | 2.929034601 | 0.280001 | 10.4608  | 1.31E-25 | 8.11E-24 |
| 3802  | SCG3      | 38.83839846 | 2.921431857 | 0.533779 | 5.473109 | 4.42E-08 | 2.28E-07 |
| 2773  | EPB41L4B  | 119.407191  | 2.92070626  | 0.469746 | 6.217628 | 5.05E-10 | 3.57E-09 |
| 5634  | CKMT1B    | 257.8358338 | 2.916274025 | 0.654816 | 4.453578 | 8.45E-06 | 2.94E-05 |
| 2982  | FRMD1     | 22.05305168 | 2.915712864 | 0.482115 | 6.047751 | 1.47E-09 | 9.65E-09 |
| 6785  | TTPA      | 1.210811918 | 2.915601734 | 0.746678 | 3.904763 | 9.43E-05 | 0.000272 |
| 3399  | PAPPA2    | 64.01812323 | 2.902011417 | 0.504831 | 5.748482 | 9.00E-09 | 5.19E-08 |
| 4674  | CDH17     | 158.0153978 | 2.899461763 | 0.58594  | 4.948391 | 7.48E-07 | 3.14E-06 |
| 3237  | TJP3      | 69.31862505 | 2.899131627 | 0.494551 | 5.862151 | 4.57E-09 | 2.77E-08 |
| 6791  | ANKRD30F  | 3.289201824 | 2.888304614 | 0.739994 | 3.903145 | 9.50E-05 | 0.000274 |
| 1984  | MYT1      | 10.45213162 | 2.888251073 | 0.413469 | 6.98541  | 2.84E-12 | 2.81E-11 |
| 9365  | GALNTL6   | 1.186484638 | 2.885649141 | 1.004051 | 2.874007 | 0.004053 | 0.008483 |
| 55    | FZp686O24 | 289.1814038 | 2.884094812 | 0.221725 | 13.00753 | 1.11E-38 | 3.95E-36 |
| 9360  | CYP1A2    | 3.142584288 | 2.884078671 | 1.002703 | 2.876303 | 0.004024 | 0.008426 |
| 10211 | SYT14     | 20.04686067 | 2.872861269 | 1.114693 | 2.577266 | 0.009959 | 0.019116 |
| 7713  | CKMT1A    | 147.4426285 | 2.870439262 | 0.812157 | 3.534341 | 0.000409 | 0.001039 |

|       |           |             |             |          |          |          |          |
|-------|-----------|-------------|-------------|----------|----------|----------|----------|
| 2255  | F11       | 36.68357867 | 2.862276828 | 0.427655 | 6.692952 | 2.19E-11 | 1.90E-10 |
| 1207  | OVOL1     | 64.82561007 | 2.861547435 | 0.357515 | 8.004001 | 1.20E-15 | 1.96E-14 |
| 6051  | MTNR1A    | 3.256708219 | 2.858166976 | 0.673732 | 4.242292 | 2.21E-05 | 7.17E-05 |
| 2175  | B4GALNT3  | 149.4519446 | 2.856973251 | 0.421048 | 6.785393 | 1.16E-11 | 1.04E-10 |
| 1283  | CA4       | 123.7039302 | 2.843598929 | 0.36065  | 7.884647 | 3.15E-15 | 4.82E-14 |
| 3597  | NAT8L     | 44.77805507 | 2.843500243 | 0.507172 | 5.606584 | 2.06E-08 | 1.12E-07 |
| 2218  | ADRB1     | 18.74646891 | 2.836498042 | 0.420949 | 6.738346 | 1.60E-11 | 1.42E-10 |
| 8016  | CA10      | 6.519907041 | 2.835290146 | 0.832582 | 3.405419 | 0.000661 | 0.001615 |
| 184   | NR3C2     | 462.407865  | 2.826800077 | 0.248524 | 11.37434 | 5.61E-30 | 5.95E-28 |
| 13068 | CTAG2     | 0.820168633 | 2.822492597 | 1.739375 | 1.622705 | 0.104652 | 0.156969 |
| 3892  | LOC151658 | 0.902507512 | 2.818767736 | 0.521239 | 5.407823 | 6.38E-08 | 3.21E-07 |
| 1887  | SLC17A1   | 403.7612513 | 2.804262155 | 0.395088 | 7.097808 | 1.27E-12 | 1.32E-11 |
| 13363 | HTR3B     | 0.656963498 | 2.800111845 | 1.83899  | 1.522636 | 0.12785  | 0.187532 |
| 2917  | CAMK2B    | 74.78432873 | 2.796532752 | 0.458511 | 6.099168 | 1.07E-09 | 7.16E-09 |
| 11522 | C14orf53  | 0.693464871 | 2.796260978 | 1.325155 | 2.110138 | 0.034846 | 0.059275 |
| 1902  | IGSF11    | 27.6496821  | 2.795038123 | 0.394536 | 7.084365 | 1.40E-12 | 1.44E-11 |
| 168   | ANKRD56   | 161.2124129 | 2.78932908  | 0.241847 | 11.53346 | 8.95E-31 | 1.04E-28 |
| 4182  | GLRA2     | 1.495354296 | 2.776824549 | 0.5318   | 5.221557 | 1.77E-07 | 8.32E-07 |
| 3174  | MFSD6L    | 15.21197448 | 2.772220809 | 0.469697 | 5.902148 | 3.59E-09 | 2.22E-08 |
| 1111  | TMEM27    | 3053.241419 | 2.762954852 | 0.339337 | 8.142211 | 3.88E-16 | 6.85E-15 |
| 414   | ACSS3     | 1055.038141 | 2.760629152 | 0.276445 | 9.986171 | 1.75E-23 | 8.30E-22 |
| 13196 | ADAM2     | 0.74703005  | 2.758481392 | 1.746406 | 1.579519 | 0.114217 | 0.169655 |
| 5492  | BMPR1B    | 434.9017072 | 2.756744756 | 0.609159 | 4.525494 | 6.03E-06 | 2.15E-05 |
| 2098  | EGF       | 385.8388302 | 2.755862306 | 0.402282 | 6.850565 | 7.36E-12 | 6.87E-11 |
| 1487  | FSTL4     | 31.662498   | 2.754920212 | 0.362847 | 7.592502 | 3.14E-14 | 4.14E-13 |
| 5812  | SLC22A9   | 1.85739693  | 2.749828835 | 0.62947  | 4.368479 | 1.25E-05 | 4.22E-05 |
| 6820  | ASCL4     | 1.721831513 | 2.74716497  | 0.705986 | 3.891247 | 9.97E-05 | 0.000287 |
| 1421  | SLC26A9   | 133.5186773 | 2.742728476 | 0.357204 | 7.678318 | 1.61E-14 | 2.22E-13 |
| 1830  | LOC723809 | 71.52781395 | 2.740513008 | 0.382486 | 7.165011 | 7.78E-13 | 8.32E-12 |
| 3073  | SLC38A4   | 157.2550633 | 2.734344619 | 0.457167 | 5.981069 | 2.22E-09 | 1.41E-08 |
| 9967  | SLC26A3   | 0.981255924 | 2.732403847 | 1.02557  | 2.664279 | 0.007715 | 0.015173 |
| 282   | MPP7      | 258.1602243 | 2.730374991 | 0.255775 | 10.6749  | 1.33E-26 | 9.27E-25 |
| 4102  | C6orf168  | 73.23108875 | 2.726903153 | 0.516409 | 5.280513 | 1.29E-07 | 6.16E-07 |
| 2251  | SIX4      | 43.32047348 | 2.724578335 | 0.406946 | 6.695177 | 2.15E-11 | 1.88E-10 |
| 720   | GYLTL1B   | 187.4543943 | 2.718196655 | 0.30316  | 8.966198 | 3.07E-19 | 8.36E-18 |
| 3263  | STK32A    | 32.2854491  | 2.713323149 | 0.464624 | 5.839827 | 5.23E-09 | 3.14E-08 |
| 13642 | CTAG1B    | 0.721920048 | 2.706803395 | 1.879099 | 1.440479 | 0.149732 | 0.215121 |
| 1482  | ATP6V1C2  | 343.7432551 | 2.701879171 | 0.35572  | 7.595515 | 3.07E-14 | 4.05E-13 |
| 9293  | SCEL      | 3.896092297 | 2.701129341 | 0.930683 | 2.902309 | 0.003704 | 0.007813 |
| 3030  | ACE2      | 1850.561249 | 2.698643102 | 0.448982 | 6.010578 | 1.85E-09 | 1.20E-08 |
| 10341 | LHCGR     | 6.937986481 | 2.698528197 | 1.065409 | 2.532858 | 0.011314 | 0.021445 |
| 5922  | C14orf180 | 64.33133539 | 2.696991339 | 0.625475 | 4.311912 | 1.62E-05 | 5.36E-05 |
| 6885  | MPRSS111  | 1.680255516 | 2.696612865 | 0.696905 | 3.869415 | 0.000109 | 0.000311 |
| 4222  | ARHGEF38  | 9.086341388 | 2.694871496 | 0.518483 | 5.197605 | 2.02E-07 | 9.37E-07 |
| 4858  | CHRM1     | 1.6722926   | 2.694756986 | 0.554495 | 4.859839 | 1.17E-06 | 4.74E-06 |
| 1520  | NRG2      | 45.32753379 | 2.690809872 | 0.357172 | 7.533643 | 4.93E-14 | 6.37E-13 |
| 5529  | AFM       | 15.96556204 | 2.688449527 | 0.596571 | 4.506505 | 6.59E-06 | 2.34E-05 |



|       |           |             |             |          |          |          |          |
|-------|-----------|-------------|-------------|----------|----------|----------|----------|
| 3441  | FCN2      | 9.781344743 | 2.687347733 | 0.470405 | 5.712838 | 1.11E-08 | 6.33E-08 |
| 25    | CDS1      | 634.9064636 | 2.683625101 | 0.19193  | 13.98234 | 2.00E-44 | 1.57E-41 |
| 4391  | OR2T10    | 8.962163986 | 2.680957348 | 0.524798 | 5.108554 | 3.25E-07 | 1.45E-06 |
| 1383  | RDH12     | 48.11992681 | 2.671938808 | 0.345063 | 7.743329 | 9.68E-15 | 1.37E-13 |
| 2805  | LOC338651 | 12.10813129 | 2.659678991 | 0.429784 | 6.18841  | 6.08E-10 | 4.25E-09 |
| 2568  | SEMA3D    | 192.0021846 | 2.656909878 | 0.414396 | 6.411521 | 1.44E-10 | 1.10E-09 |
| 6657  | CDH9      | 8.623011374 | 2.654766846 | 0.670389 | 3.960037 | 7.49E-05 | 0.000221 |
| 1595  | SLC16A11  | 29.6085122  | 2.644513596 | 0.356042 | 7.427539 | 1.11E-13 | 1.36E-12 |
| 905   | FAM169A   | 181.3254284 | 2.64062069  | 0.310246 | 8.511369 | 1.72E-17 | 3.72E-16 |
| 3242  | FA2H      | 136.1255839 | 2.636777357 | 0.449988 | 5.859662 | 4.64E-09 | 2.80E-08 |
| 4831  | PSCA      | 14.73729995 | 2.636192339 | 0.540802 | 4.874597 | 1.09E-06 | 4.42E-06 |
| 2320  | COL19A1   | 16.66285291 | 2.628495924 | 0.395836 | 6.640374 | 3.13E-11 | 2.64E-10 |
| 4203  | SORCS1    | 33.81635943 | 2.623414277 | 0.503908 | 5.206136 | 1.93E-07 | 8.99E-07 |
| 3230  | ATRNL1    | 115.2317744 | 2.620784306 | 0.446807 | 5.86559  | 4.48E-09 | 2.72E-08 |
| 1774  | TSPAN5    | 206.952909  | 2.612523012 | 0.362147 | 7.213978 | 5.43E-13 | 6.00E-12 |
| 39    | ACAT1     | 4769.774192 | 2.611135976 | 0.194627 | 13.41609 | 4.87E-41 | 2.45E-38 |
| 3580  | SLC5A12   | 1424.414721 | 2.609663319 | 0.464615 | 5.616831 | 1.94E-08 | 1.06E-07 |
| 947   | C5orf23   | 2150.262699 | 2.605656337 | 0.308397 | 8.449042 | 2.94E-17 | 6.08E-16 |
| 2150  | ABO       | 138.0669831 | 2.604164156 | 0.382461 | 6.808958 | 9.83E-12 | 8.96E-11 |
| 5867  | ESRP1     | 115.1905305 | 2.60258578  | 0.600077 | 4.337087 | 1.44E-05 | 4.82E-05 |
| 1110  | PKHD1     | 920.3030673 | 2.600743552 | 0.319164 | 8.14861  | 3.68E-16 | 6.50E-15 |
| 6984  | NRAP      | 6.759198275 | 2.594028143 | 0.676865 | 3.832413 | 0.000127 | 0.000356 |
| 68    | C6orf155  | 86.88886912 | 2.594023631 | 0.203309 | 12.75899 | 2.78E-37 | 8.01E-35 |
| 6964  | ZNF536    | 4.93370696  | 2.593347505 | 0.675156 | 3.841107 | 0.000122 | 0.000345 |
| 13187 | PSG3      | 0.859803588 | 2.592210946 | 1.636962 | 1.58355  | 0.113296 | 0.168389 |
| 1030  | AGTR1     | 256.6192094 | 2.591251847 | 0.312685 | 8.287096 | 1.16E-16 | 2.21E-15 |
| 5326  | CCBE1     | 63.4444511  | 2.588812979 | 0.561606 | 4.609657 | 4.03E-06 | 1.48E-05 |
| 5807  | LOC286002 | 3.354407891 | 2.588256536 | 0.592116 | 4.371199 | 1.24E-05 | 4.17E-05 |
| 315   | TRIM2     | 2062.566845 | 2.585802712 | 0.247128 | 10.46342 | 1.27E-25 | 7.91E-24 |
| 7635  | C11orf16  | 0.895878275 | 2.580581167 | 0.723624 | 3.566191 | 0.000362 | 0.00093  |
| 2958  | PROC      | 64.56661387 | 2.574239239 | 0.424538 | 6.063629 | 1.33E-09 | 8.82E-09 |
| 11641 | ZNF705D   | 1.021099612 | 2.571819595 | 1.246267 | 2.063618 | 0.039054 | 0.065759 |
| 1584  | MCF2      | 10.72471927 | 2.570651624 | 0.345399 | 7.442564 | 9.87E-14 | 1.22E-12 |
| 1539  | KLHL3     | 392.5258044 | 2.564339008 | 0.341566 | 7.507598 | 6.02E-14 | 7.67E-13 |
| 6364  | STOML3    | 1.211757819 | 2.563364776 | 0.625854 | 4.095786 | 4.21E-05 | 0.00013  |
| 1061  | PFKFB2    | 1131.860855 | 2.561272486 | 0.311402 | 8.224967 | 1.95E-16 | 3.61E-15 |
| 12132 | OR1N1     | 0.689379416 | 2.556210237 | 1.3334   | 1.917061 | 0.05523  | 0.089232 |
| 7055  | NOTUM     | 4.130979905 | 2.551372066 | 0.671626 | 3.798801 | 0.000145 | 0.000404 |
| 9669  | C10orf27  | 1.100930843 | 2.54935855  | 0.924417 | 2.7578   | 0.005819 | 0.011797 |
| 2396  | NAT8B     | 120.3265229 | 2.548064907 | 0.388336 | 6.5615   | 5.33E-11 | 4.36E-10 |
| 40    | ALDH6A1   | 640.9104551 | 2.538506853 | 0.190108 | 13.353   | 1.14E-40 | 5.58E-38 |
| 1793  | LRRC19    | 349.6503871 | 2.527542011 | 0.351191 | 7.197068 | 6.15E-13 | 6.73E-12 |
| 7898  | LOC285796 | 1.39533125  | 2.524925804 | 0.732059 | 3.449074 | 0.000563 | 0.001396 |
| 2553  | SLC6A4    | 6.051479037 | 2.515966678 | 0.391664 | 6.42379  | 1.33E-10 | 1.02E-09 |
| 430   | EMX2OS    | 1416.098811 | 2.513929565 | 0.25368  | 9.909846 | 3.77E-23 | 1.72E-21 |
| 305   | RCAN2     | 2720.90124  | 2.513721562 | 0.23895  | 10.51988 | 7.00E-26 | 4.50E-24 |
| 4630  | ST8SIA5   | 79.17005458 | 2.513482971 | 0.505337 | 4.973874 | 6.56E-07 | 2.78E-06 |

|       |           |             |             |          |          |          |          |
|-------|-----------|-------------|-------------|----------|----------|----------|----------|
| 3150  | ARSF      | 56.63537676 | 2.511223696 | 0.424035 | 5.922206 | 3.18E-09 | 1.98E-08 |
| 2469  | ATP13A4   | 29.06199752 | 2.507142548 | 0.385796 | 6.498617 | 8.11E-11 | 6.44E-10 |
| 2130  | SLC22A11  | 1535.304487 | 2.503112865 | 0.366826 | 6.823715 | 8.87E-12 | 8.16E-11 |
| 14232 | PSKH2     | 0.506263095 | 2.500376413 | 2.001998 | 1.248941 | 0.211687 | 0.291545 |
| 7305  | SNCB      | 3.538210852 | 2.498318769 | 0.675514 | 3.698397 | 0.000217 | 0.000582 |
| 5511  | GAL3ST3   | 9.289992969 | 2.495924278 | 0.552926 | 4.514026 | 6.36E-06 | 2.26E-05 |
| 7445  | SLC36A2   | 78.46513737 | 2.490593892 | 0.684472 | 3.638711 | 0.000274 | 0.000721 |
| 5242  | SLC30A8   | 5.738082606 | 2.489281871 | 0.53483  | 4.654339 | 3.25E-06 | 1.22E-05 |
| 1510  | WNK3      | 34.97801083 | 2.486642956 | 0.329169 | 7.554309 | 4.21E-14 | 5.47E-13 |
| 6030  | WFIKKN2   | 3.960089693 | 2.486136016 | 0.584678 | 4.252147 | 2.12E-05 | 6.88E-05 |
| 3383  | OMG       | 17.66989957 | 2.480923261 | 0.430889 | 5.75769  | 8.53E-09 | 4.94E-08 |
| 4159  | C1orf161  | 93.81739654 | 2.480641258 | 0.472933 | 5.245233 | 1.56E-07 | 7.36E-07 |
| 6345  | LOC148145 | 8.30065856  | 2.476986323 | 0.603346 | 4.105419 | 4.04E-05 | 0.000125 |
| 9095  | IGFBPL1   | 1.242618231 | 2.470668336 | 0.829512 | 2.978458 | 0.002897 | 0.006243 |
| 7189  | SST       | 213.9495778 | 2.466028604 | 0.657721 | 3.749354 | 0.000177 | 0.000483 |
| 8179  | ALLC      | 1.569336189 | 2.465806824 | 0.737598 | 3.34302  | 0.000829 | 0.001986 |
| 3745  | EDAR      | 15.58851471 | 2.463885847 | 0.447181 | 5.509812 | 3.59E-08 | 1.88E-07 |
| 1562  | MPPED2    | 124.2487797 | 2.463706433 | 0.329493 | 7.477275 | 7.59E-14 | 9.52E-13 |
| 126   | ENPP5     | 678.8495856 | 2.45936174  | 0.205758 | 11.95267 | 6.29E-33 | 9.78E-31 |
| 1228  | PHYHIPL   | 580.3005362 | 2.45425347  | 0.307658 | 7.977213 | 1.50E-15 | 2.39E-14 |
| 977   | ACADL     | 836.3446086 | 2.451515271 | 0.292517 | 8.380751 | 5.26E-17 | 1.06E-15 |
| 2808  | TMEM30B   | 343.1894694 | 2.443816016 | 0.395284 | 6.182425 | 6.31E-10 | 4.41E-09 |
| 13985 | ASB11     | 0.577370926 | 2.443318884 | 1.845838 | 1.323691 | 0.185606 | 0.260122 |
| 2740  | OSTBETA   | 43.87080022 | 2.441899568 | 0.391066 | 6.244214 | 4.26E-10 | 3.05E-09 |
| 5786  | HABP2     | 3189.977952 | 2.441005407 | 0.557447 | 4.378903 | 1.19E-05 | 4.04E-05 |
| 1787  | GLYATL1   | 1188.878342 | 2.432435556 | 0.337831 | 7.20015  | 6.01E-13 | 6.60E-12 |
| 6482  | GSDMC     | 11.46147518 | 2.427107752 | 0.601355 | 4.036067 | 5.44E-05 | 0.000164 |
| 1009  | NSUN7     | 159.4422556 | 2.426679572 | 0.291314 | 8.330112 | 8.08E-17 | 1.57E-15 |
| 2782  | TUBB4     | 523.330502  | 2.426159374 | 0.390549 | 6.212179 | 5.23E-10 | 3.68E-09 |
| 452   | MAPT      | 1441.399507 | 2.423390585 | 0.247445 | 9.793651 | 1.20E-22 | 5.20E-21 |
| 1593  | GRB14     | 401.8579014 | 2.42308391  | 0.326067 | 7.431245 | 1.08E-13 | 1.32E-12 |
| 4093  | LOC643008 | 131.3920884 | 2.422707312 | 0.458451 | 5.284556 | 1.26E-07 | 6.03E-07 |
| 2897  | CCDC158   | 15.20611095 | 2.422308467 | 0.39624  | 6.11323  | 9.76E-10 | 6.60E-09 |
| 4083  | C5orf47   | 1.617890632 | 2.41918194  | 0.4573   | 5.290144 | 1.22E-07 | 5.87E-07 |
| 1059  | TMEM171   | 350.7050385 | 2.411463833 | 0.293044 | 8.229028 | 1.89E-16 | 3.49E-15 |
| 695   | RLN2      | 11.02658825 | 2.410854354 | 0.26691  | 9.032452 | 1.68E-19 | 4.73E-18 |
| 11038 | IL20      | 0.596777649 | 2.410222881 | 1.058203 | 2.277657 | 0.022747 | 0.040394 |
| 2086  | ILDR2     | 31.30273727 | 2.408341859 | 0.350968 | 6.861992 | 6.79E-12 | 6.38E-11 |
| 3981  | KGFLP1    | 8.366778985 | 2.406444078 | 0.449523 | 5.353333 | 8.63E-08 | 4.25E-07 |
| 3912  | SLC17A3   | 3747.166679 | 2.405534017 | 0.445832 | 5.395604 | 6.83E-08 | 3.42E-07 |
| 469   | EXPH5     | 312.8886    | 2.40446251  | 0.246902 | 9.738525 | 2.07E-22 | 8.63E-21 |
| 4091  | GRIK5     | 47.27324573 | 2.402813393 | 0.454539 | 5.286263 | 1.25E-07 | 5.98E-07 |
| 6500  | RIMS1     | 6.857790577 | 2.401739374 | 0.596157 | 4.028704 | 5.61E-05 | 0.000169 |
| 2636  | MGAM      | 1029.636148 | 2.393909968 | 0.3776   | 6.3398   | 2.30E-10 | 1.71E-09 |
| 1014  | KL        | 2125.488956 | 2.393890207 | 0.28791  | 8.31471  | 9.20E-17 | 1.78E-15 |
| 4845  | LUZP2     | 7.595641548 | 2.392589433 | 0.491405 | 4.868877 | 1.12E-06 | 4.54E-06 |
| 7251  | STAC2     | 436.3094537 | 2.392190122 | 0.642297 | 3.72443  | 0.000196 | 0.000529 |

|       |           |             |             |          |          |          |          |
|-------|-----------|-------------|-------------|----------|----------|----------|----------|
| 1447  | SMTNL2    | 323.9645814 | 2.38961723  | 0.312831 | 7.638679 | 2.19E-14 | 2.97E-13 |
| 5062  | ERBB4     | 98.04588249 | 2.38711275  | 0.503556 | 4.740515 | 2.13E-06 | 8.25E-06 |
| 8227  | LPA       | 1.516084954 | 2.385180886 | 0.717988 | 3.322035 | 0.000894 | 0.002129 |
| 3712  | GPR81     | 54.70879254 | 2.38474939  | 0.431147 | 5.531174 | 3.18E-08 | 1.68E-07 |
| 2722  | BBOX1     | 2873.92993  | 2.381310431 | 0.380261 | 6.262313 | 3.79E-10 | 2.73E-09 |
| 14118 | MMP26     | 0.493007176 | 2.375862868 | 1.853508 | 1.28182  | 0.199906 | 0.277543 |
| 4867  | LHFPL4    | 2.71518483  | 2.375476192 | 0.489443 | 4.853426 | 1.21E-06 | 4.89E-06 |
| 1050  | MIA2      | 263.8626135 | 2.365469697 | 0.287018 | 8.241541 | 1.70E-16 | 3.17E-15 |
| 336   | PAIP2B    | 408.4582163 | 2.363674203 | 0.227786 | 10.37674 | 3.16E-25 | 1.85E-23 |
| 2034  | UBE2QL1   | 238.3057142 | 2.36325702  | 0.341307 | 6.924132 | 4.39E-12 | 4.23E-11 |
| 1251  | THSD7A    | 492.4400473 | 2.360809259 | 0.297652 | 7.931443 | 2.17E-15 | 3.39E-14 |
| 4959  | DIRAS1    | 106.1288124 | 2.36029737  | 0.492484 | 4.792636 | 1.65E-06 | 6.51E-06 |
| 3690  | MIOX      | 1178.596446 | 2.359365212 | 0.425915 | 5.539524 | 3.03E-08 | 1.61E-07 |
| 12645 | PLK5P     | 1.371790925 | 2.354968155 | 1.339161 | 1.75854  | 0.078656 | 0.121924 |
| 3471  | MYL3      | 67.70191951 | 2.353527963 | 0.413277 | 5.694796 | 1.24E-08 | 6.98E-08 |
| 8463  | KNG1      | 155.4941222 | 2.353284064 | 0.730464 | 3.221631 | 0.001275 | 0.002952 |
| 551   | TUB       | 461.4990843 | 2.35327355  | 0.248865 | 9.456041 | 3.20E-21 | 1.14E-19 |
| 4532  | MYO16     | 15.07863114 | 2.34636162  | 0.467566 | 5.018249 | 5.21E-07 | 2.26E-06 |
| 1214  | AQP7      | 142.5071862 | 2.342255519 | 0.292856 | 7.99799  | 1.26E-15 | 2.04E-14 |
| 438   | MOBK1A    | 2259.823215 | 2.339832911 | 0.237097 | 9.868661 | 5.69E-23 | 2.55E-21 |
| 12653 | CCKAR     | 0.92353062  | 2.337164512 | 1.330804 | 1.756204 | 0.079054 | 0.122454 |
| 5269  | ASPG      | 171.3878522 | 2.331422105 | 0.502288 | 4.641609 | 3.46E-06 | 1.29E-05 |
| 3444  | C9orf71   | 191.317581  | 2.330247723 | 0.408079 | 5.710281 | 1.13E-08 | 6.42E-08 |
| 6680  | CPEB1     | 65.29209118 | 2.328882882 | 0.589675 | 3.949437 | 7.83E-05 | 0.00023  |
| 12389 | FAM123A   | 0.626081022 | 2.327052807 | 1.265144 | 1.839358 | 0.065862 | 0.104203 |
| 7707  | WBSCR17   | 408.2899998 | 2.326661602 | 0.657845 | 3.536792 | 0.000405 | 0.00103  |
| 3015  | PTGER3    | 2241.814783 | 2.316137172 | 0.384538 | 6.023164 | 1.71E-09 | 1.11E-08 |
| 546   | SLC25A21  | 9.624663843 | 2.308340925 | 0.243832 | 9.466951 | 2.88E-21 | 1.03E-19 |
| 5138  | SYNGR3    | 102.036549  | 2.306030732 | 0.489582 | 4.710206 | 2.47E-06 | 9.44E-06 |
| 2059  | COL25A1   | 65.78871879 | 2.304757812 | 0.334587 | 6.888364 | 5.64E-12 | 5.37E-11 |
| 3161  | TRHDE     | 411.475134  | 2.302176419 | 0.389413 | 5.911919 | 3.38E-09 | 2.10E-08 |
| 5836  | CYP4Z2P   | 2.15118414  | 2.298955581 | 0.528041 | 4.353744 | 1.34E-05 | 4.49E-05 |
| 4690  | PROZ      | 5.421064682 | 2.296966735 | 0.465579 | 4.933573 | 8.07E-07 | 3.37E-06 |
| 2433  | LOC145837 | 161.7622045 | 2.290564957 | 0.350843 | 6.528751 | 6.63E-11 | 5.34E-10 |
| 618   | RALGPS1   | 193.4728226 | 2.289310993 | 0.247363 | 9.254873 | 2.14E-20 | 6.80E-19 |
| 858   | TBC1D14   | 3960.441185 | 2.286134453 | 0.265116 | 8.623153 | 6.51E-18 | 1.49E-16 |
| 2404  | GABRB3    | 340.8413307 | 2.282415722 | 0.348243 | 6.554095 | 5.60E-11 | 4.56E-10 |
| 4115  | MEM132I   | 15.00645562 | 2.279438517 | 0.432357 | 5.272123 | 1.35E-07 | 6.42E-07 |
| 1029  | GCNT4     | 71.31714479 | 2.276969068 | 0.274737 | 8.287802 | 1.15E-16 | 2.20E-15 |
| 445   | GPD1L     | 1047.743546 | 2.275192952 | 0.231412 | 9.831768 | 8.22E-23 | 3.62E-21 |
| 3933  | CAPN14    | 12.97587596 | 2.271007418 | 0.421914 | 5.382627 | 7.34E-08 | 3.66E-07 |
| 714   | TSPAN7    | 1399.464237 | 2.270938307 | 0.252932 | 8.978462 | 2.75E-19 | 7.54E-18 |
| 2522  | FRMPD2    | 9.448024937 | 2.266343906 | 0.351613 | 6.445569 | 1.15E-10 | 8.95E-10 |
| 6833  | TCL1B     | 1.144511046 | 2.266109116 | 0.582981 | 3.887105 | 0.000101 | 0.000291 |
| 3052  | ANGPTL1   | 143.799241  | 2.264592033 | 0.377585 | 5.997567 | 2.00E-09 | 1.29E-08 |
| 3644  | ACSM2B    | 3411.022323 | 2.263551789 | 0.405958 | 5.575833 | 2.46E-08 | 1.33E-07 |
| 79    | PTPN3     | 1560.715606 | 2.26014694  | 0.17978  | 12.57171 | 3.02E-36 | 7.49E-34 |

|       |           |             |             |          |          |          |          |
|-------|-----------|-------------|-------------|----------|----------|----------|----------|
| 6851  | AQP5      | 1.943246178 | 2.256954009 | 0.581767 | 3.879484 | 0.000105 | 0.000299 |
| 1668  | SLC2A12   | 159.8817892 | 2.255508358 | 0.307386 | 7.337716 | 2.17E-13 | 2.55E-12 |
| 3037  | NIPAL1    | 25.4147054  | 2.254133716 | 0.375227 | 6.007385 | 1.89E-09 | 1.22E-08 |
| 1239  | SCN4A     | 106.6255016 | 2.252348618 | 0.283612 | 7.941669 | 1.99E-15 | 3.16E-14 |
| 2151  | SLC47A1   | 3750.164641 | 2.24813383  | 0.33021  | 6.808199 | 9.88E-12 | 9.01E-11 |
| 3259  | SLC5A10   | 1019.101262 | 2.245117328 | 0.384048 | 5.845927 | 5.04E-09 | 3.03E-08 |
| 211   | MAP7      | 1081.500652 | 2.243825261 | 0.202305 | 11.09129 | 1.38E-28 | 1.28E-26 |
| 2593  | SULT1C4   | 681.5451183 | 2.243281868 | 0.351104 | 6.389215 | 1.67E-10 | 1.26E-09 |
| 1233  | MED12L    | 6.717830413 | 2.240350708 | 0.281332 | 7.963375 | 1.67E-15 | 2.66E-14 |
| 4730  | TCEAL2    | 27.66231359 | 2.238457675 | 0.455127 | 4.91831  | 8.73E-07 | 3.62E-06 |
| 1958  | FRMPD1    | 21.91534517 | 2.237100957 | 0.31847  | 7.024522 | 2.15E-12 | 2.15E-11 |
| 2268  | PDZK1P1   | 334.8896839 | 2.235159987 | 0.334608 | 6.679929 | 2.39E-11 | 2.07E-10 |
| 2138  | FLRT3     | 715.2796016 | 2.235080085 | 0.327924 | 6.815842 | 9.37E-12 | 8.59E-11 |
| 4394  | CDH12     | 11.1957773  | 2.233367894 | 0.437284 | 5.107365 | 3.27E-07 | 1.46E-06 |
| 6980  | RNASE7    | 1.324626033 | 2.225326621 | 0.580423 | 3.833973 | 0.000126 | 0.000354 |
| 304   | FAM160A1  | 94.19876827 | 2.222366027 | 0.211246 | 10.52029 | 6.97E-26 | 4.49E-24 |
| 12785 | DEFB132   | 0.879779124 | 2.221952775 | 1.300641 | 1.708353 | 0.087571 | 0.134257 |
| 3317  | ZNF98     | 6.777197751 | 2.218687603 | 0.38215  | 5.8058   | 6.41E-09 | 3.79E-08 |
| 2363  | CUBN      | 7494.150935 | 2.217928835 | 0.336201 | 6.597024 | 4.19E-11 | 3.48E-10 |
| 5324  | C22orf31  | 1.07085352  | 2.217569289 | 0.480995 | 4.610379 | 4.02E-06 | 1.48E-05 |
| 10370 | LOC284551 | 1.524011    | 2.214653484 | 0.879774 | 2.517298 | 0.011826 | 0.022353 |
| 11755 | MPRSS11L  | 0.751831586 | 2.213084547 | 1.086776 | 2.036376 | 0.041713 | 0.069557 |
| 908   | GATM      | 6556.134026 | 2.211193311 | 0.259892 | 8.508109 | 1.77E-17 | 3.82E-16 |
| 2844  | HMGCLL1   | 9.177846551 | 2.210505084 | 0.359484 | 6.149103 | 7.79E-10 | 5.37E-09 |
| 436   | GPHN      | 592.8160634 | 2.20964199  | 0.223756 | 9.875241 | 5.33E-23 | 2.40E-21 |
| 5833  | GRIA4     | 190.5907855 | 2.2089384   | 0.507217 | 4.355013 | 1.33E-05 | 4.47E-05 |
| 5095  | PPP4R4    | 9.948219645 | 2.203924271 | 0.466033 | 4.729114 | 2.26E-06 | 8.68E-06 |
| 5031  | SCGB1D2   | 27.23778375 | 2.201973342 | 0.462674 | 4.759228 | 1.94E-06 | 7.57E-06 |
| 2058  | RGS9BP    | 5.594039756 | 2.198610522 | 0.318987 | 6.892473 | 5.48E-12 | 5.22E-11 |
| 3876  | C12orf59  | 120.370452  | 2.197378412 | 0.405485 | 5.419142 | 5.99E-08 | 3.03E-07 |
| 12158 | ATP12A    | 1.045360673 | 2.197030478 | 1.151161 | 1.908534 | 0.056322 | 0.090802 |
| 5124  | DACT2     | 37.64475583 | 2.195117322 | 0.465459 | 4.716028 | 2.40E-06 | 9.20E-06 |
| 9430  | A2ML1     | 1.416046498 | 2.194860767 | 0.771118 | 2.846334 | 0.004423 | 0.009193 |
| 12051 | EPHA5     | 4.860948547 | 2.194033967 | 1.128755 | 1.943764 | 0.051924 | 0.084454 |
| 2569  | ALDH1L1   | 2104.057118 | 2.192359353 | 0.341949 | 6.41137  | 1.44E-10 | 1.10E-09 |
| 9471  | CALCB     | 1.09959425  | 2.191428948 | 0.774197 | 2.830585 | 0.004646 | 0.009615 |
| 3496  | AVPR1B    | 40.77314625 | 2.190031401 | 0.385718 | 5.677808 | 1.36E-08 | 7.65E-08 |
| 1999  | KCNJ3     | 255.2946165 | 2.189778863 | 0.314564 | 6.96132  | 3.37E-12 | 3.31E-11 |
| 6921  | FBXO40    | 2.508792813 | 2.18887447  | 0.567622 | 3.856216 | 0.000115 | 0.000326 |
| 8681  | CPNE6     | 1.242316172 | 2.185345421 | 0.69626  | 3.13869  | 0.001697 | 0.003832 |
| 388   | IAA0664P  | 47.33077688 | 2.184787324 | 0.216331 | 10.09926 | 5.57E-24 | 2.81E-22 |
| 2470  | G6GALNAc  | 172.9526339 | 2.183910733 | 0.336093 | 6.497932 | 8.14E-11 | 6.46E-10 |
| 4296  | PRR15L    | 104.132348  | 2.183240135 | 0.423192 | 5.158978 | 2.48E-07 | 1.13E-06 |
| 2021  | SLC16A12  | 1850.836723 | 2.18070808  | 0.314367 | 6.936815 | 4.01E-12 | 3.89E-11 |
| 768   | ZDHHC23   | 343.4810958 | 2.180033199 | 0.246612 | 8.839935 | 9.58E-19 | 2.44E-17 |
| 901   | SGSM1     | 162.6256133 | 2.176260735 | 0.255335 | 8.523142 | 1.55E-17 | 3.38E-16 |
| 11398 | C3orf30   | 0.999186528 | 2.174555879 | 1.011193 | 2.150485 | 0.031517 | 0.054199 |

|       |           |             |             |          |          |          |          |
|-------|-----------|-------------|-------------|----------|----------|----------|----------|
| 2604  | TINAG     | 616.3307818 | 2.174405751 | 0.341082 | 6.375027 | 1.83E-10 | 1.38E-09 |
| 2134  | CCDC160   | 24.77323382 | 2.173556221 | 0.318684 | 6.820421 | 9.08E-12 | 8.34E-11 |
| 12392 | ELSPBP1   | 1.13203178  | 2.170909638 | 1.180993 | 1.838208 | 0.066032 | 0.104446 |
| 7285  | 43900     | 20.18802504 | 2.16996188  | 0.585529 | 3.705985 | 0.000211 | 0.000567 |
| 1508  | CLIC5     | 336.0869541 | 2.167285362 | 0.286853 | 7.555391 | 4.18E-14 | 5.43E-13 |
| 5488  | CBLN2     | 3.904066386 | 2.16575848  | 0.478343 | 4.527625 | 5.97E-06 | 2.13E-05 |
| 9276  | TDGF3     | 1.362287257 | 2.163935562 | 0.744374 | 2.907053 | 0.003649 | 0.00771  |
| 3245  | ENO3      | 147.6205016 | 2.163661014 | 0.36958  | 5.854381 | 4.79E-09 | 2.89E-08 |
| 4623  | SLC17A4   | 633.2960497 | 2.161763213 | 0.434221 | 4.978483 | 6.41E-07 | 2.72E-06 |
| 4932  | KCNV1     | 27.3527882  | 2.159085891 | 0.449009 | 4.808559 | 1.52E-06 | 6.04E-06 |
| 6402  | SLC17A8   | 3.172220119 | 2.158274816 | 0.529543 | 4.075734 | 4.59E-05 | 0.00014  |
| 7058  | NOL4      | 12.55468134 | 2.156093475 | 0.567738 | 3.797689 | 0.000146 | 0.000406 |
| 11126 | UGT2B4    | 1.219299168 | 2.15449059  | 0.960135 | 2.243945 | 0.024836 | 0.043754 |
| 4473  | LOC283392 | 108.6445079 | 2.153997529 | 0.426005 | 5.056275 | 4.28E-07 | 1.87E-06 |
| 5707  | PKD1L2    | 82.38911346 | 2.150640981 | 0.486961 | 4.416455 | 1.00E-05 | 3.45E-05 |
| 109   | TMEM38B   | 766.1604601 | 2.146535707 | 0.175738 | 12.21441 | 2.60E-34 | 4.70E-32 |
| 5129  | ZCCHC16   | 2.863465319 | 2.13525566  | 0.452967 | 4.713928 | 2.43E-06 | 9.29E-06 |
| 5609  | SCNN1A    | 2178.903459 | 2.133120354 | 0.47747  | 4.46755  | 7.91E-06 | 2.77E-05 |
| 809   | COL4A4    | 642.5241408 | 2.132131075 | 0.244065 | 8.735906 | 2.42E-18 | 5.86E-17 |
| 4137  | TUBBP5    | 17.51762841 | 2.127715605 | 0.40449  | 5.260248 | 1.44E-07 | 6.82E-07 |
| 9778  | ABCG8     | 1.372209305 | 2.12763226  | 0.781409 | 2.722817 | 0.006473 | 0.012974 |
| 491   | SOX6      | 746.7142826 | 2.120400054 | 0.219595 | 9.65597  | 4.64E-22 | 1.85E-20 |
| 1121  | ASTN2     | 387.5847621 | 2.111016354 | 0.25975  | 8.127107 | 4.40E-16 | 7.69E-15 |
| 8542  | RAB25     | 79.55573607 | 2.110394562 | 0.661146 | 3.192027 | 0.001413 | 0.003242 |
| 3476  | LRP2      | 10957.69871 | 2.107191529 | 0.370289 | 5.690673 | 1.27E-08 | 7.14E-08 |
| 7294  | FSD2      | 1.754017032 | 2.106266104 | 0.569111 | 3.700976 | 0.000215 | 0.000577 |
| 3770  | DNASE1    | 155.7170966 | 2.102810801 | 0.382659 | 5.495257 | 3.90E-08 | 2.03E-07 |
| 13174 | MSLNL     | 0.568447072 | 2.094348587 | 1.31826  | 1.588722 | 0.112123 | 0.166831 |
| 1656  | OCLN      | 197.0268265 | 2.093591525 | 0.284814 | 7.350731 | 1.97E-13 | 2.33E-12 |
| 5123  | CSDC2     | 218.6793619 | 2.092538643 | 0.443699 | 4.71612  | 2.40E-06 | 9.20E-06 |
| 9924  | HYAL4     | 2.186792813 | 2.090873267 | 0.780441 | 2.679092 | 0.007382 | 0.014581 |
| 3760  | ACSM2A    | 4297.262859 | 2.090334598 | 0.380077 | 5.499769 | 3.80E-08 | 1.98E-07 |
| 1960  | PIP5K1B   | 119.0242017 | 2.089874491 | 0.297674 | 7.020685 | 2.21E-12 | 2.21E-11 |
| 4003  | FAM196B   | 47.60149385 | 2.089321604 | 0.391344 | 5.338832 | 9.35E-08 | 4.58E-07 |
| 30    | RAB3IP    | 1384.19147  | 2.086989656 | 0.151784 | 13.74977 | 5.11E-43 | 3.34E-40 |
| 1613  | DLG2      | 52.09373569 | 2.083935675 | 0.281252 | 7.409489 | 1.27E-13 | 1.54E-12 |
| 1334  | SLC10A5   | 14.62744659 | 2.08375812  | 0.266568 | 7.816992 | 5.41E-15 | 7.95E-14 |
| 6427  | OC1001301 | 2.752025124 | 2.083685477 | 0.51307  | 4.061215 | 4.88E-05 | 0.000149 |
| 3046  | GDA       | 1556.056669 | 2.082752746 | 0.346918 | 6.003585 | 1.93E-09 | 1.24E-08 |
| 1706  | BTNL9     | 994.8285242 | 2.080532717 | 0.285417 | 7.289461 | 3.11E-13 | 3.58E-12 |
| 2908  | TMSB15A   | 22.53992771 | 2.07967833  | 0.340707 | 6.104008 | 1.03E-09 | 6.97E-09 |
| 5141  | LOC285768 | 76.35750871 | 2.078134594 | 0.441453 | 4.707483 | 2.51E-06 | 9.56E-06 |
| 494   | KIF21A    | 1743.036791 | 2.077336063 | 0.215319 | 9.647709 | 5.03E-22 | 1.99E-20 |
| 3218  | FMO1      | 1284.037994 | 2.073491777 | 0.352933 | 5.875036 | 4.23E-09 | 2.57E-08 |
| 559   | CA2       | 3380.329733 | 2.071703417 | 0.219541 | 9.436505 | 3.85E-21 | 1.35E-19 |
| 1618  | PTH1R     | 327.3851627 | 2.06962144  | 0.279544 | 7.40356  | 1.33E-13 | 1.61E-12 |
| 571   | PANK1     | 496.1513469 | 2.066386754 | 0.219729 | 9.404254 | 5.24E-21 | 1.80E-19 |

|       |           |             |             |          |          |          |          |
|-------|-----------|-------------|-------------|----------|----------|----------|----------|
| 990   | GHR       | 488.0142278 | 2.065828173 | 0.247109 | 8.359979 | 6.27E-17 | 1.24E-15 |
| 11479 | ASCL3     | 0.533906372 | 2.065373286 | 0.97085  | 2.127386 | 0.033388 | 0.057012 |
| 375   | PAQR5     | 998.1037679 | 2.064458145 | 0.203486 | 10.14545 | 3.47E-24 | 1.81E-22 |
| 3287  | CRNA0017  | 9.118578301 | 2.061041208 | 0.353948 | 5.823001 | 5.78E-09 | 3.45E-08 |
| 5368  | RMST      | 3.654733233 | 2.055399568 | 0.448376 | 4.584098 | 4.56E-06 | 1.67E-05 |
| 14746 | MAGEC2    | 0.777869863 | 2.053919292 | 1.894199 | 1.084321 | 0.278223 | 0.369777 |
| 451   | NTN4      | 1997.906185 | 2.050178087 | 0.209148 | 9.802502 | 1.10E-22 | 4.77E-21 |
| 792   | PLCL1     | 606.9059654 | 2.047944982 | 0.233513 | 8.770157 | 1.78E-18 | 4.42E-17 |
| 2463  | TMEM125   | 164.7807719 | 2.046143285 | 0.314557 | 6.504845 | 7.78E-11 | 6.19E-10 |
| 4419  | UNC80     | 19.92592429 | 2.044647933 | 0.401643 | 5.090707 | 3.57E-07 | 1.58E-06 |
| 11190 | NKX2-3    | 1.189504409 | 2.043695265 | 0.918569 | 2.224868 | 0.02609  | 0.045701 |
| 11229 | TBL1Y     | 1.178678321 | 2.043463532 | 0.925413 | 2.208164 | 0.027233 | 0.047537 |
| 5192  | SLIT2     | 500.9163742 | 2.043295654 | 0.436642 | 4.679571 | 2.87E-06 | 1.09E-05 |
| 5710  | HS6ST2    | 19.75435352 | 2.042170329 | 0.46256  | 4.414929 | 1.01E-05 | 3.47E-05 |
| 2661  | TRIM10    | 77.18365426 | 2.042083128 | 0.32317  | 6.318907 | 2.63E-10 | 1.94E-09 |
| 63    | CLCN5     | 1825.910651 | 2.027583915 | 0.157824 | 12.8471  | 8.93E-38 | 2.78E-35 |
| 8     | PCCA      | 857.3545377 | 2.026234889 | 0.130972 | 15.47076 | 5.47E-54 | 1.34E-50 |
| 808   | RNF152    | 223.7974174 | 2.026153124 | 0.231924 | 8.736285 | 2.41E-18 | 5.84E-17 |
| 4974  | SPON1     | 1891.673709 | 2.024062782 | 0.42286  | 4.786603 | 1.70E-06 | 6.68E-06 |
| 641   | NNT       | 2972.526592 | 2.022664343 | 0.220193 | 9.185877 | 4.08E-20 | 1.25E-18 |
| 6257  | DHRS2     | 50.74192494 | 2.020469902 | 0.486656 | 4.151737 | 3.30E-05 | 0.000103 |
| 124   | LIFR      | 2190.474269 | 2.01940808  | 0.168545 | 11.98139 | 4.45E-33 | 7.03E-31 |
| 1912  | FRAS1     | 869.8213985 | 2.018332736 | 0.28526  | 7.075403 | 1.49E-12 | 1.53E-11 |
| 1101  | MYLK4     | 100.3839016 | 2.01723612  | 0.247253 | 8.158591 | 3.39E-16 | 6.03E-15 |
| 4701  | PKIA      | 269.726117  | 2.015664136 | 0.408908 | 4.929385 | 8.25E-07 | 3.44E-06 |
| 4409  | EML6      | 114.3763884 | 2.010612992 | 0.394576 | 5.095626 | 3.48E-07 | 1.55E-06 |
| 12102 | CGA       | 0.955326223 | 2.008547346 | 1.041585 | 1.928356 | 0.053811 | 0.087155 |
| 1767  | ZNF711    | 255.7284684 | 2.007036612 | 0.277807 | 7.224561 | 5.03E-13 | 5.58E-12 |
| 1358  | PEG3      | 158.8146246 | 2.006301324 | 0.257781 | 7.78297  | 7.08E-15 | 1.02E-13 |
| 7094  | LGI3      | 12.17583345 | 2.002332224 | 0.528729 | 3.78707  | 0.000152 | 0.000421 |
| 6511  | FAM26D    | 1.02882056  | 2.001923655 | 0.497561 | 4.023477 | 5.73E-05 | 0.000173 |
| 11823 | MAFA      | 0.661510556 | 2.000253268 | 0.99353  | 2.013279 | 0.044085 | 0.073088 |
| 3824  | SCIN      | 1860.892392 | 1.997889569 | 0.36637  | 5.4532   | 4.95E-08 | 2.54E-07 |
| 230   | GRAMD1C   | 479.8106304 | 1.99591183  | 0.181815 | 10.9777  | 4.89E-28 | 4.17E-26 |
| 9523  | CYP11A1   | 57.45141829 | 1.987152301 | 0.707396 | 2.809109 | 0.004968 | 0.010225 |
| 1049  | ANK3      | 1660.72917  | 1.986177941 | 0.24099  | 8.241731 | 1.70E-16 | 3.17E-15 |
| 7971  | FAM5B     | 7.327022664 | 1.98568444  | 0.580438 | 3.421009 | 0.000624 | 0.001534 |
| 132   | HSPA4L    | 528.5932326 | 1.981230485 | 0.167591 | 11.82181 | 3.01E-32 | 4.47E-30 |
| 3602  | SLC18A2   | 20.81385776 | 1.980716599 | 0.353401 | 5.604728 | 2.09E-08 | 1.14E-07 |
| 4943  | NAT8      | 4741.483227 | 1.979180992 | 0.412075 | 4.802963 | 1.56E-06 | 6.20E-06 |
| 514   | ATP6V1A   | 5483.097517 | 1.978520492 | 0.207315 | 9.54355  | 1.38E-21 | 5.24E-20 |
| 364   | FAM47E    | 66.22152487 | 1.97836942  | 0.193476 | 10.2254  | 1.53E-24 | 8.22E-23 |
| 1813  | EFR3B     | 114.7505432 | 1.976925525 | 0.275479 | 7.176308 | 7.16E-13 | 7.74E-12 |
| 5948  | C16orf89  | 136.9705745 | 1.974188849 | 0.459901 | 4.292636 | 1.77E-05 | 5.82E-05 |
| 851   | ABCG2     | 387.016309  | 1.972695356 | 0.228442 | 8.63543  | 5.85E-18 | 1.35E-16 |
| 537   | ABAT      | 564.0674414 | 1.968236711 | 0.207058 | 9.505725 | 1.99E-21 | 7.25E-20 |
| 6805  | C21orf130 | 23.88021607 | 1.967100779 | 0.504747 | 3.897199 | 9.73E-05 | 0.00028  |

|       |           |             |             |          |          |          |          |
|-------|-----------|-------------|-------------|----------|----------|----------|----------|
| 1875  | EMX2      | 729.6058833 | 1.962662821 | 0.275976 | 7.111718 | 1.15E-12 | 1.20E-11 |
| 5286  | C6        | 276.1579109 | 1.961349465 | 0.423603 | 4.630159 | 3.65E-06 | 1.35E-05 |
| 691   | FMEM150C  | 380.8509891 | 1.95933019  | 0.216763 | 9.039057 | 1.58E-19 | 4.48E-18 |
| 2518  | BTC       | 19.35892129 | 1.959120618 | 0.303859 | 6.447473 | 1.14E-10 | 8.85E-10 |
| 1232  | NEDD4L    | 2927.743997 | 1.957205192 | 0.245755 | 7.964047 | 1.67E-15 | 2.65E-14 |
| 3702  | ADH6      | 184.8580793 | 1.956701005 | 0.353556 | 5.534347 | 3.12E-08 | 1.65E-07 |
| 3474  | SUCNR1    | 123.824493  | 1.951075617 | 0.342788 | 5.691783 | 1.26E-08 | 7.09E-08 |
| 5553  | NOS1      | 4.207079341 | 1.950387299 | 0.433593 | 4.498201 | 6.85E-06 | 2.42E-05 |
| 2338  | GIPC2     | 693.1188316 | 1.94853449  | 0.294435 | 6.617873 | 3.64E-11 | 3.06E-10 |
| 5825  | LOC572558 | 1.4659675   | 1.948410718 | 0.446758 | 4.361224 | 1.29E-05 | 4.35E-05 |
| 10944 | KCNA4     | 0.911813481 | 1.936999829 | 0.840075 | 2.305746 | 0.021125 | 0.037835 |
| 4969  | SLC23A3   | 762.1843583 | 1.934544457 | 0.403955 | 4.789009 | 1.68E-06 | 6.61E-06 |
| 592   | FNIP2     | 1730.823399 | 1.930997266 | 0.20667  | 9.343375 | 9.33E-21 | 3.09E-19 |
| 1470  | ALMS1P    | 7.442610349 | 1.930940221 | 0.253806 | 7.607929 | 2.79E-14 | 3.71E-13 |
| 7508  | LSAMP     | 12.56920938 | 1.930180769 | 0.534013 | 3.614482 | 0.000301 | 0.000786 |
| 3300  | ACSBG1    | 16.74892126 | 1.927901495 | 0.331462 | 5.816365 | 6.01E-09 | 3.57E-08 |
| 49    | ACAA2     | 5027.364384 | 1.925493555 | 0.146189 | 13.17124 | 1.28E-39 | 5.14E-37 |
| 3765  | DDIT4L    | 901.3412472 | 1.923599153 | 0.349805 | 5.499063 | 3.82E-08 | 1.99E-07 |
| 4848  | DHDH      | 61.57542606 | 1.921885299 | 0.394905 | 4.866707 | 1.13E-06 | 4.59E-06 |
| 2693  | COL4A3    | 486.3452727 | 1.920666553 | 0.305488 | 6.287206 | 3.23E-10 | 2.35E-09 |
| 7698  | RBP4      | 1428.117668 | 1.92041153  | 0.542452 | 3.540241 | 0.0004   | 0.001018 |
| 466   | KIAA1737  | 873.0007039 | 1.920106392 | 0.196965 | 9.748463 | 1.87E-22 | 7.88E-21 |
| 4271  | CEL       | 29.09719664 | 1.919316095 | 0.371199 | 5.170584 | 2.33E-07 | 1.07E-06 |
| 4054  | CPXM2     | 1519.659726 | 1.919140314 | 0.361819 | 5.304147 | 1.13E-07 | 5.47E-07 |
| 4162  | FLJ37543  | 2.944885322 | 1.91840314  | 0.365954 | 5.242202 | 1.59E-07 | 7.47E-07 |
| 1731  | GPR98     | 43.03266111 | 1.918124934 | 0.26393  | 7.267561 | 3.66E-13 | 4.14E-12 |
| 2557  | ARNT2     | 892.5616862 | 1.917449606 | 0.298748 | 6.418274 | 1.38E-10 | 1.06E-09 |
| 2771  | NAP1L2    | 94.20600329 | 1.916417765 | 0.308119 | 6.219725 | 4.98E-10 | 3.52E-09 |
| 76    | AUH       | 547.0975047 | 1.914623435 | 0.152305 | 12.571   | 3.05E-36 | 7.49E-34 |
| 1337  | DMRTA1    | 119.9916405 | 1.914448338 | 0.245124 | 7.810138 | 5.71E-15 | 8.37E-14 |
| 1071  | IL17RD    | 445.1133131 | 1.91141923  | 0.232921 | 8.206302 | 2.28E-16 | 4.18E-15 |
| 4433  | C8orf47   | 139.7610883 | 1.910459107 | 0.375936 | 5.081874 | 3.74E-07 | 1.65E-06 |
| 2114  | AGMAT     | 569.3184335 | 1.908009064 | 0.279222 | 6.833307 | 8.30E-12 | 7.69E-11 |
| 3566  | KCTD16    | 53.05380294 | 1.906901772 | 0.338942 | 5.626039 | 1.84E-08 | 1.01E-07 |
| 2922  | SLC1A2    | 33.53379521 | 1.906839329 | 0.31287  | 6.094673 | 1.10E-09 | 7.36E-09 |
| 467   | FAM59A    | 344.5313002 | 1.903099025 | 0.195248 | 9.7471   | 1.90E-22 | 7.97E-21 |
| 853   | HLF       | 503.4138349 | 1.901753322 | 0.220243 | 8.6348   | 5.88E-18 | 1.35E-16 |
| 11581 | PCDH8     | 0.503815087 | 1.898964332 | 0.909058 | 2.088937 | 0.036713 | 0.062141 |
| 4488  | MYO7B     | 476.7096447 | 1.896691581 | 0.375793 | 5.04717  | 4.48E-07 | 1.96E-06 |
| 4727  | PRDM16    | 96.84954496 | 1.894906012 | 0.385214 | 4.919103 | 8.69E-07 | 3.61E-06 |
| 1208  | FRMD3     | 264.0220174 | 1.894193463 | 0.23667  | 8.003531 | 1.21E-15 | 1.96E-14 |
| 4556  | KCNJ11    | 123.6155169 | 1.89354963  | 0.378183 | 5.006965 | 5.53E-07 | 2.38E-06 |
| 12143 | C14orf39  | 0.454254745 | 1.893519174 | 0.989274 | 1.91405  | 0.055614 | 0.089771 |
| 7109  | PLAC4     | 14.44244795 | 1.892332966 | 0.500473 | 3.781089 | 0.000156 | 0.000431 |
| 12150 | PSG9      | 1.143359922 | 1.891384455 | 0.989665 | 1.911135 | 0.055987 | 0.090321 |
| 52    | L2HGDH    | 270.3667487 | 1.890667386 | 0.144838 | 13.0537  | 6.05E-39 | 2.30E-36 |
| 4740  | CYP3A4    | 10.43019836 | 1.890347284 | 0.384719 | 4.913576 | 8.94E-07 | 3.70E-06 |

|       |           |             |             |          |          |          |          |
|-------|-----------|-------------|-------------|----------|----------|----------|----------|
| 5571  | IL1RL1    | 162.5247243 | 1.889228146 | 0.420951 | 4.488002 | 7.19E-06 | 2.53E-05 |
| 1850  | SLC3A1    | 11167.60937 | 1.888381066 | 0.264682 | 7.134537 | 9.71E-13 | 1.03E-11 |
| 4562  | FUT6      | 348.113214  | 1.885883361 | 0.376936 | 5.003189 | 5.64E-07 | 2.42E-06 |
| 4069  | TMEM35    | 12.2227754  | 1.88554171  | 0.355966 | 5.296965 | 1.18E-07 | 5.67E-07 |
| 7331  | MAL       | 1502.022219 | 1.878770358 | 0.509375 | 3.688383 | 0.000226 | 0.000603 |
| 7348  | UNC13C    | 13.07662722 | 1.877450634 | 0.509862 | 3.682275 | 0.000231 | 0.000617 |
| 5905  | AMBP      | 61.35674906 | 1.874170797 | 0.433907 | 4.319288 | 1.57E-05 | 5.20E-05 |
| 6981  | C15orf50  | 1.300167796 | 1.873758193 | 0.488846 | 3.83302  | 0.000127 | 0.000355 |
| 1861  | FMO5      | 172.3120359 | 1.873369484 | 0.262889 | 7.126077 | 1.03E-12 | 1.09E-11 |
| 2234  | ACOT11    | 367.6464112 | 1.870550527 | 0.278512 | 6.716233 | 1.86E-11 | 1.64E-10 |
| 11619 | INSM1     | 0.769953512 | 1.868190809 | 0.901082 | 2.073276 | 0.038147 | 0.064353 |
| 1197  | EFHD1     | 1201.136468 | 1.867301407 | 0.23287  | 8.018638 | 1.07E-15 | 1.75E-14 |
| 6318  | FCAMR     | 434.1700028 | 1.866755135 | 0.453377 | 4.117447 | 3.83E-05 | 0.000119 |
| 11375 | NORD115-5 | 0.674717787 | 1.864852393 | 0.8634   | 2.159894 | 0.030781 | 0.053041 |
| 3095  | C18orf34  | 22.48347552 | 1.861628102 | 0.311983 | 5.967087 | 2.42E-09 | 1.53E-08 |
| 594   | RRAGD     | 2005.960166 | 1.860935255 | 0.199255 | 9.339455 | 9.68E-21 | 3.20E-19 |
| 8467  | PNMT      | 2.667431756 | 1.854404116 | 0.575829 | 3.220408 | 0.00128  | 0.002963 |
| 2623  | AMDHD1    | 94.94493934 | 1.848916735 | 0.290967 | 6.354376 | 2.09E-10 | 1.56E-09 |
| 5966  | SLC29A2   | 120.7852305 | 1.847752778 | 0.431296 | 4.284192 | 1.83E-05 | 6.03E-05 |
| 2482  | GULP1     | 576.4552665 | 1.847174264 | 0.284732 | 6.487414 | 8.73E-11 | 6.90E-10 |
| 5337  | SYT9      | 191.9602793 | 1.846698212 | 0.401195 | 4.602994 | 4.16E-06 | 1.53E-05 |
| 245   | EPHX2     | 1162.256991 | 1.845397755 | 0.169693 | 10.8749  | 1.52E-27 | 1.21E-25 |
| 2715  | SGK494    | 135.8631207 | 1.844889716 | 0.294401 | 6.266579 | 3.69E-10 | 2.66E-09 |
| 3810  | MYOT      | 23.74179094 | 1.843972525 | 0.337281 | 5.467166 | 4.57E-08 | 2.35E-07 |
| 10280 | GLB1L3    | 18.19976    | 1.843197849 | 0.722192 | 2.552226 | 0.010704 | 0.020408 |
| 9505  | SLCO1A2   | 5.31044745  | 1.837494323 | 0.651826 | 2.818994 | 0.004817 | 0.009934 |
| 331   | SLC25A4   | 1525.144511 | 1.837247951 | 0.176674 | 10.39906 | 2.50E-25 | 1.48E-23 |
| 2399  | UGT8      | 538.5591317 | 1.834594767 | 0.279652 | 6.560269 | 5.37E-11 | 4.39E-10 |
| 624   | WDR31     | 54.36138818 | 1.831790921 | 0.198343 | 9.235479 | 2.57E-20 | 8.08E-19 |
| 9478  | PRSS22    | 6.904583524 | 1.831474348 | 0.647967 | 2.826494 | 0.004706 | 0.009732 |
| 5669  | CYP2J2    | 2747.230225 | 1.830475135 | 0.412585 | 4.436602 | 9.14E-06 | 3.16E-05 |
| 4127  | RAP1GAP   | 1689.63155  | 1.827093111 | 0.347104 | 5.263823 | 1.41E-07 | 6.70E-07 |
| 3970  | WDR63     | 14.78514358 | 1.826633548 | 0.340778 | 5.36018  | 8.31E-08 | 4.10E-07 |
| 6473  | ABCC8     | 3.087683321 | 1.826561363 | 0.451978 | 4.041264 | 5.32E-05 | 0.000161 |
| 2309  | C2orf88   | 297.1611974 | 1.82085011  | 0.273917 | 6.647454 | 2.98E-11 | 2.53E-10 |
| 2647  | TLL1      | 333.9242981 | 1.81993496  | 0.287669 | 6.32649  | 2.51E-10 | 1.86E-09 |
| 7045  | LOC285629 | 4.207099552 | 1.819625458 | 0.4785   | 3.80277  | 0.000143 | 0.000398 |
| 5976  | RXRG      | 2.88638229  | 1.8192608   | 0.425075 | 4.279862 | 1.87E-05 | 6.13E-05 |
| 3565  | PGR       | 193.0401842 | 1.817887038 | 0.323093 | 5.626509 | 1.84E-08 | 1.01E-07 |
| 5306  | C22orf43  | 2.527733691 | 1.816748647 | 0.393616 | 4.615538 | 3.92E-06 | 1.45E-05 |
| 3484  | APOM      | 567.3940648 | 1.81618596  | 0.31953  | 5.683928 | 1.32E-08 | 7.41E-08 |
| 11069 | CHRNA4    | 5.280050649 | 1.815657612 | 0.800819 | 2.267251 | 0.023375 | 0.041392 |
| 8139  | LOC642597 | 0.97352738  | 1.813929214 | 0.540325 | 3.357111 | 0.000788 | 0.001897 |
| 4342  | CPT1B     | 514.4315957 | 1.813128091 | 0.352947 | 5.137114 | 2.79E-07 | 1.26E-06 |
| 2242  | KLHL32    | 56.04286792 | 1.810373571 | 0.270083 | 6.703027 | 2.04E-11 | 1.78E-10 |
| 6145  | KY        | 38.75776129 | 1.807759652 | 0.430051 | 4.203596 | 2.63E-05 | 8.38E-05 |
| 2586  | PXK       | 400.9189526 | 1.801832707 | 0.281768 | 6.394748 | 1.61E-10 | 1.22E-09 |



|       |          |             |             |          |          |          |          |
|-------|----------|-------------|-------------|----------|----------|----------|----------|
| 4232  | CRHBP    | 34.07269824 | 1.801122597 | 0.346866 | 5.192568 | 2.07E-07 | 9.61E-07 |
| 800   | SC5DL    | 1497.331197 | 1.800283714 | 0.205629 | 8.755021 | 2.04E-18 | 5.00E-17 |
| 5334  | LONRF2   | 145.0141399 | 1.79731168  | 0.390247 | 4.605572 | 4.11E-06 | 1.51E-05 |
| 870   | AKAP6    | 315.3314345 | 1.79536268  | 0.208736 | 8.60112  | 7.89E-18 | 1.78E-16 |
| 1373  | PAR5     | 33.92902894 | 1.791540727 | 0.230786 | 7.762777 | 8.31E-15 | 1.19E-13 |
| 2119  | ASPA     | 366.150302  | 1.790346646 | 0.262108 | 6.830565 | 8.46E-12 | 7.82E-11 |
| 154   | ACADSB   | 1232.664708 | 1.789875458 | 0.154139 | 11.61209 | 3.58E-31 | 4.55E-29 |
| 3160  | THSD7B   | 90.31184193 | 1.785940165 | 0.302094 | 5.911878 | 3.38E-09 | 2.10E-08 |
| 877   | RAB40B   | 556.1327045 | 1.783205599 | 0.207888 | 8.577739 | 9.68E-18 | 2.16E-16 |
| 10426 | PCDHB1   | 1.490634797 | 1.780780074 | 0.711802 | 2.50179  | 0.012357 | 0.023231 |
| 1226  | ASB9     | 175.3666667 | 1.778295006 | 0.22271  | 7.984809 | 1.41E-15 | 2.25E-14 |
| 464   | C4orf12  | 103.8405066 | 1.775872825 | 0.18215  | 9.749512 | 1.85E-22 | 7.82E-21 |
| 9037  | CKMT2    | 533.0007873 | 1.77436127  | 0.59154  | 2.999564 | 0.002704 | 0.005864 |
| 889   | ATP8A1   | 788.0314466 | 1.772333307 | 0.207358 | 8.547233 | 1.26E-17 | 2.78E-16 |
| 1534  | OTUD7A   | 28.8882432  | 1.771269636 | 0.23572  | 7.514284 | 5.72E-14 | 7.31E-13 |
| 3632  | CHAD     | 19.91716097 | 1.76628202  | 0.316415 | 5.582168 | 2.38E-08 | 1.28E-07 |
| 5804  | SOX8     | 42.92335264 | 1.765501316 | 0.403721 | 4.373075 | 1.23E-05 | 4.14E-05 |
| 1075  | CIT      | 1467.316323 | 1.764710217 | 0.215192 | 8.200629 | 2.39E-16 | 4.36E-15 |
| 476   | C11orf54 | 3482.509305 | 1.764086418 | 0.181753 | 9.705967 | 2.84E-22 | 1.17E-20 |
| 3044  | ADCY5    | 590.6728985 | 1.76385191  | 0.293759 | 6.004419 | 1.92E-09 | 1.24E-08 |
| 2660  | CCDC68   | 255.4069869 | 1.763810341 | 0.279129 | 6.318983 | 2.63E-10 | 1.94E-09 |
| 561   | PVRL3    | 292.0693624 | 1.760957708 | 0.18668  | 9.433031 | 3.98E-21 | 1.39E-19 |
| 5175  | ABCA8    | 159.0410853 | 1.76093713  | 0.375618 | 4.688104 | 2.76E-06 | 1.04E-05 |
| 3749  | FHDC1    | 210.0570351 | 1.758169392 | 0.319298 | 5.506356 | 3.66E-08 | 1.91E-07 |
| 8371  | BEX1     | 79.28186067 | 1.757796738 | 0.53874  | 3.262793 | 0.001103 | 0.002583 |
| 3172  | CASP12   | 13.30639554 | 1.753871177 | 0.297144 | 5.902432 | 3.58E-09 | 2.21E-08 |
| 10587 | SLC7A14  | 1.312955947 | 1.75319114  | 0.718536 | 2.439949 | 0.014689 | 0.027196 |
| 4392  | GADD45G  | 232.6719786 | 1.752932761 | 0.343172 | 5.108034 | 3.26E-07 | 1.45E-06 |
| 11103 | PYY      | 1.887183359 | 1.752550961 | 0.777718 | 2.253454 | 0.024231 | 0.042776 |
| 8576  | ZNF676   | 18.61212805 | 1.750443839 | 0.550361 | 3.180536 | 0.00147  | 0.00336  |
| 2409  | EGOT     | 103.2429561 | 1.749765211 | 0.267108 | 6.55077  | 5.72E-11 | 4.66E-10 |
| 11461 | GATSL2   | 1.446054757 | 1.748989057 | 0.82059  | 2.13138  | 0.033058 | 0.056534 |
| 8385  | PPP1R1C  | 5.67744095  | 1.745942858 | 0.535964 | 3.257573 | 0.001124 | 0.002627 |
| 1815  | FBP1     | 941.951908  | 1.74566381  | 0.243327 | 7.174138 | 7.28E-13 | 7.86E-12 |
| 7987  | RTP2     | 4.281638658 | 1.74434236  | 0.510855 | 3.414558 | 0.000639 | 0.001568 |
| 337   | ITGA6    | 5463.652438 | 1.742189243 | 0.167937 | 10.37407 | 3.25E-25 | 1.89E-23 |
| 2882  | KCNJ15   | 1513.622668 | 1.741540409 | 0.284412 | 6.123305 | 9.17E-10 | 6.23E-09 |
| 1186  | PABPC4L  | 204.3995673 | 1.740455572 | 0.216654 | 8.033348 | 9.48E-16 | 1.57E-14 |
| 9265  | KIF1A    | 5.852340257 | 1.74007131  | 0.597697 | 2.911295 | 0.003599 | 0.007615 |
| 1140  | ABARAPL  | 3718.21495  | 1.738791822 | 0.214507 | 8.105977 | 5.23E-16 | 9.00E-15 |
| 6726  | ZNF556   | 6.438808538 | 1.737932283 | 0.442019 | 3.931805 | 8.43E-05 | 0.000246 |
| 7401  | DEFB1    | 4684.57575  | 1.737678016 | 0.475218 | 3.656588 | 0.000256 | 0.000677 |
| 10117 | KCNG3    | 2.15109823  | 1.737556617 | 0.66581  | 2.609688 | 0.009062 | 0.017559 |
| 3968  | ERVFRDE1 | 6.558140398 | 1.735972044 | 0.323805 | 5.361169 | 8.27E-08 | 4.08E-07 |
| 7002  | COCH     | 91.50414515 | 1.735642044 | 0.453992 | 3.823071 | 0.000132 | 0.000369 |
| 802   | KLHL13   | 311.4282513 | 1.734885289 | 0.198267 | 8.750243 | 2.13E-18 | 5.20E-17 |
| 4629  | C9orf106 | 2.936205091 | 1.732186294 | 0.348243 | 4.974075 | 6.56E-07 | 2.78E-06 |

|       |           |             |             |          |          |          |          |
|-------|-----------|-------------|-------------|----------|----------|----------|----------|
| 2811  | VIPR1     | 33.88971352 | 1.730170835 | 0.279989 | 6.179433 | 6.43E-10 | 4.49E-09 |
| 3920  | NPY6R     | 303.2777063 | 1.729743567 | 0.320895 | 5.390371 | 7.03E-08 | 3.51E-07 |
| 1221  | KIF13B    | 1934.565733 | 1.729291423 | 0.216373 | 7.992194 | 1.33E-15 | 2.13E-14 |
| 755   | SAMD5     | 340.2245827 | 1.726892915 | 0.194572 | 8.87534  | 6.97E-19 | 1.81E-17 |
| 377   | BCKDHB    | 434.1614775 | 1.726004891 | 0.17035  | 10.1321  | 3.98E-24 | 2.07E-22 |
| 6467  | GPM6A     | 298.931836  | 1.722525546 | 0.426063 | 4.042892 | 5.28E-05 | 0.00016  |
| 12297 | APOA2     | 0.847374194 | 1.722048814 | 0.922534 | 1.866651 | 0.06195  | 0.098747 |
| 10276 | C3orf50   | 0.77655359  | 1.719587552 | 0.673035 | 2.554976 | 0.01062  | 0.020256 |
| 7141  | SLC5A11   | 6.506020796 | 1.717780881 | 0.456065 | 3.766522 | 0.000166 | 0.000454 |
| 455   | GK        | 524.8752238 | 1.717206135 | 0.175509 | 9.784161 | 1.32E-22 | 5.67E-21 |
| 11347 | FAM123C   | 0.96346051  | 1.717198775 | 0.792582 | 2.166589 | 0.030266 | 0.052282 |
| 5261  | TNFAIP6   | 1203.847043 | 1.716860995 | 0.369594 | 4.645265 | 3.40E-06 | 1.27E-05 |
| 11682 | CST5      | 5.127648955 | 1.716204754 | 0.834903 | 2.055575 | 0.039824 | 0.066819 |
| 1106  | PDGFD     | 1793.510457 | 1.716132043 | 0.210473 | 8.1537   | 3.53E-16 | 6.26E-15 |
| 4350  | TAL2      | 18.34065383 | 1.715695249 | 0.334381 | 5.130962 | 2.88E-07 | 1.30E-06 |
| 3463  | DIRAS2    | 585.4843069 | 1.715227857 | 0.301041 | 5.697655 | 1.21E-08 | 6.87E-08 |
| 684   | ZNF844    | 247.7729199 | 1.715148529 | 0.189536 | 9.04922  | 1.44E-19 | 4.13E-18 |
| 10512 | PRR18     | 1.767524665 | 1.714329376 | 0.694634 | 2.467962 | 0.013588 | 0.025337 |
| 1555  | LNX1      | 329.0100697 | 1.706481292 | 0.227899 | 7.487882 | 7.00E-14 | 8.82E-13 |
| 465   | SYDE2     | 90.60032641 | 1.706198182 | 0.175005 | 9.749429 | 1.86E-22 | 7.82E-21 |
| 4755  | PDE1C     | 147.0424572 | 1.705866653 | 0.347675 | 4.906492 | 9.27E-07 | 3.82E-06 |
| 1313  | CACNB2    | 132.6366081 | 1.704384708 | 0.217271 | 7.844508 | 4.35E-15 | 6.49E-14 |
| 8905  | SRMS      | 1.367848497 | 1.704159077 | 0.558718 | 3.050126 | 0.002287 | 0.005035 |
| 6146  | SLC2A2    | 952.3103005 | 1.703481221 | 0.405253 | 4.203503 | 2.63E-05 | 8.38E-05 |
| 6956  | FABP4     | 238.3623358 | 1.702853389 | 0.443045 | 3.843524 | 0.000121 | 0.000342 |
| 1370  | PLEKHH1   | 445.0723394 | 1.701546335 | 0.219131 | 7.764981 | 8.17E-15 | 1.17E-13 |
| 3147  | NEBL      | 1286.660218 | 1.699802212 | 0.286897 | 5.924787 | 3.13E-09 | 1.95E-08 |
| 2177  | EDNRB     | 3521.061608 | 1.699168903 | 0.250557 | 6.781578 | 1.19E-11 | 1.07E-10 |
| 387   | PLEKHA7   | 649.6974239 | 1.69874813  | 0.16819  | 10.10017 | 5.51E-24 | 2.79E-22 |
| 8075  | TREH      | 31.04998842 | 1.698583507 | 0.502293 | 3.381656 | 0.000721 | 0.001749 |
| 3305  | SSTR1     | 78.29178597 | 1.69823281  | 0.292163 | 5.812628 | 6.15E-09 | 3.65E-08 |
| 11108 | CPN1      | 11.10559719 | 1.6972357   | 0.754247 | 2.25024  | 0.024434 | 0.043115 |
| 6421  | LOC440173 | 125.7781162 | 1.697123419 | 0.417397 | 4.065965 | 4.78E-05 | 0.000146 |
| 1874  | ELOVL7    | 1790.470157 | 1.696263922 | 0.238496 | 7.112331 | 1.14E-12 | 1.19E-11 |
| 567   | C14orf105 | 1154.268185 | 1.696159003 | 0.180202 | 9.412552 | 4.84E-21 | 1.67E-19 |
| 1628  | CMTM4     | 1822.606007 | 1.694024836 | 0.229222 | 7.390337 | 1.46E-13 | 1.76E-12 |
| 659   | TBC1D4    | 1495.955095 | 1.692293048 | 0.184971 | 9.148978 | 5.75E-20 | 1.71E-18 |
| 3777  | PLLP      | 682.0307709 | 1.690100203 | 0.307927 | 5.48864  | 4.05E-08 | 2.10E-07 |
| 2643  | PDZK1     | 3372.107665 | 1.68782831  | 0.26665  | 6.329745 | 2.46E-10 | 1.82E-09 |
| 779   | C5orf30   | 283.9476365 | 1.686847968 | 0.191459 | 8.810507 | 1.25E-18 | 3.13E-17 |
| 5506  | C9orf24   | 23.69100876 | 1.683648001 | 0.372811 | 4.516086 | 6.30E-06 | 2.24E-05 |
| 12163 | C16orf11  | 0.797100386 | 1.683616734 | 0.882587 | 1.907593 | 0.056444 | 0.090953 |
| 2037  | C9orf66   | 179.3061807 | 1.680046551 | 0.242699 | 6.922354 | 4.44E-12 | 4.27E-11 |
| 4875  | ASXL3     | 41.47406316 | 1.679467132 | 0.346723 | 4.843826 | 1.27E-06 | 5.12E-06 |
| 3458  | KATNAL2   | 127.1015752 | 1.679407124 | 0.294582 | 5.70098  | 1.19E-08 | 6.75E-08 |
| 3985  | GMPR      | 245.9330243 | 1.679275911 | 0.313775 | 5.351856 | 8.71E-08 | 4.28E-07 |
| 981   | EHHADH    | 3108.346282 | 1.678766447 | 0.200504 | 8.372717 | 5.63E-17 | 1.13E-15 |

|       |          |             |             |          |          |          |          |
|-------|----------|-------------|-------------|----------|----------|----------|----------|
| 7376  | CDH20    | 3.224896107 | 1.678331804 | 0.457667 | 3.667149 | 0.000245 | 0.000652 |
| 4448  | GDF6     | 277.2055217 | 1.67641278  | 0.33042  | 5.07358  | 3.90E-07 | 1.72E-06 |
| 2981  | AQP1     | 12678.20892 | 1.674063814 | 0.276745 | 6.049115 | 1.46E-09 | 9.58E-09 |
| 3164  | DACH1    | 160.7276483 | 1.67259842  | 0.283047 | 5.909267 | 3.44E-09 | 2.13E-08 |
| 3894  | CYS1     | 1563.217824 | 1.671391301 | 0.309108 | 5.40715  | 6.40E-08 | 3.22E-07 |
| 750   | APOOL    | 229.1025089 | 1.670331206 | 0.187985 | 8.885468 | 6.37E-19 | 1.66E-17 |
| 13399 | SALL3    | 0.783797182 | 1.670086301 | 1.104509 | 1.512062 | 0.130518 | 0.190931 |
| 3578  | LINGO4   | 17.83005004 | 1.668919343 | 0.297068 | 5.617971 | 1.93E-08 | 1.06E-07 |
| 12236 | SLC6A15  | 17.54219448 | 1.667579153 | 0.883968 | 1.88647  | 0.059232 | 0.094884 |
| 8541  | C1orf187 | 2.882891067 | 1.666953356 | 0.522132 | 3.192592 | 0.00141  | 0.003236 |
| 11059 | ABCC13   | 1.348353423 | 1.66579529  | 0.733631 | 2.270619 | 0.02317  | 0.041067 |
| 5443  | ALDH8A1  | 1015.815546 | 1.664488751 | 0.366246 | 4.544724 | 5.50E-06 | 1.98E-05 |
| 13513 | CEACAM7  | 0.657852774 | 1.664096271 | 1.122009 | 1.48314  | 0.138037 | 0.200227 |
| 8357  | LRRC31   | 24.04133648 | 1.661993979 | 0.508521 | 3.268289 | 0.001082 | 0.002538 |
| 6572  | C21orf62 | 122.6824046 | 1.66186976  | 0.416114 | 3.993785 | 6.50E-05 | 0.000194 |
| 3774  | MLANA    | 2.815593794 | 1.661152325 | 0.30257  | 5.49015  | 4.02E-08 | 2.09E-07 |
| 1679  | DSG2     | 4899.644769 | 1.660745346 | 0.2268   | 7.322523 | 2.43E-13 | 2.84E-12 |
| 10143 | ZNF705A  | 2.616819312 | 1.660337555 | 0.638461 | 2.600533 | 0.009308 | 0.017987 |
| 2704  | THRB     | 384.655084  | 1.658845525 | 0.264286 | 6.276705 | 3.46E-10 | 2.51E-09 |
| 2139  | DNAJA4   | 704.4029404 | 1.657976378 | 0.243306 | 6.814363 | 9.47E-12 | 8.68E-11 |
| 7016  | CYSLTR2  | 198.4770285 | 1.657543393 | 0.434278 | 3.816778 | 0.000135 | 0.000378 |
| 605   | C7orf41  | 807.1457659 | 1.657458369 | 0.178231 | 9.299516 | 1.41E-20 | 4.57E-19 |
| 6788  | PTPN20B  | 87.23960891 | 1.657356965 | 0.424528 | 3.903996 | 9.46E-05 | 0.000273 |
| 568   | MTSS1    | 1902.712031 | 1.656524232 | 0.176021 | 9.410921 | 4.92E-21 | 1.70E-19 |
| 588   | CEACAM1  | 463.1745007 | 1.655440888 | 0.176884 | 9.358921 | 8.06E-21 | 2.69E-19 |
| 611   | MSI2     | 335.1793001 | 1.655355761 | 0.178167 | 9.291022 | 1.53E-20 | 4.90E-19 |
| 8985  | DACH2    | 3.33969726  | 1.655142263 | 0.548068 | 3.019958 | 0.002528 | 0.005515 |
| 6423  | MDGA2    | 4.770179373 | 1.653912524 | 0.406895 | 4.06472  | 4.81E-05 | 0.000147 |
| 185   | PRKAA2   | 1443.295751 | 1.653617237 | 0.145377 | 11.37471 | 5.59E-30 | 5.95E-28 |
| 7402  | DIO1     | 47.54895152 | 1.653553938 | 0.45224  | 3.656365 | 0.000256 | 0.000677 |
| 1994  | ALDH1B1  | 1352.457987 | 1.652102822 | 0.237097 | 6.968045 | 3.21E-12 | 3.16E-11 |
| 3286  | NECAB1   | 222.8051626 | 1.650535814 | 0.283445 | 5.823119 | 5.78E-09 | 3.45E-08 |
| 2533  | CRNA0008 | 70.45746534 | 1.650430021 | 0.256401 | 6.436921 | 1.22E-10 | 9.43E-10 |
| 460   | ACSL1    | 7135.529579 | 1.649178687 | 0.168913 | 9.763471 | 1.62E-22 | 6.88E-21 |
| 3886  | C1orf172 | 65.2920332  | 1.649012634 | 0.304792 | 5.410297 | 6.29E-08 | 3.17E-07 |
| 721   | GOT1     | 2659.634427 | 1.64818086  | 0.18383  | 8.965774 | 3.08E-19 | 8.38E-18 |
| 6327  | ZSCAN4   | 3.073820326 | 1.646620744 | 0.400164 | 4.114866 | 3.87E-05 | 0.00012  |
| 3425  | ASB16    | 24.18558111 | 1.640910122 | 0.286599 | 5.725459 | 1.03E-08 | 5.90E-08 |
| 8881  | ART3     | 2.24241376  | 1.64067658  | 0.536332 | 3.059066 | 0.00222  | 0.0049   |
| 911   | ENTPD5   | 526.4984306 | 1.638637364 | 0.192826 | 8.498018 | 1.93E-17 | 4.15E-16 |
| 2539  | PDZRN3   | 227.5793058 | 1.638165468 | 0.254702 | 6.431699 | 1.26E-10 | 9.74E-10 |
| 3341  | SLC19A2  | 621.3790399 | 1.637568299 | 0.282738 | 5.791821 | 6.96E-09 | 4.08E-08 |
| 693   | ZNF189   | 1277.409363 | 1.635816246 | 0.181053 | 9.034997 | 1.64E-19 | 4.64E-18 |
| 5569  | TMIGD1   | 6.773928214 | 1.635491196 | 0.364319 | 4.489177 | 7.15E-06 | 2.52E-05 |
| 959   | GK3P     | 54.30282728 | 1.634540632 | 0.19391  | 8.429393 | 3.47E-17 | 7.10E-16 |
| 5296  | PLCH2    | 209.0630723 | 1.634465416 | 0.353516 | 4.623456 | 3.77E-06 | 1.40E-05 |
| 3017  | TPPP     | 557.723228  | 1.628607782 | 0.270452 | 6.021803 | 1.72E-09 | 1.12E-08 |

|       |           |             |             |          |          |          |          |
|-------|-----------|-------------|-------------|----------|----------|----------|----------|
| 7168  | KCNMB2    | 52.26056648 | 1.624942539 | 0.432617 | 3.756076 | 0.000173 | 0.000472 |
| 827   | HOOK1     | 1556.687422 | 1.624752133 | 0.187063 | 8.685594 | 3.77E-18 | 8.93E-17 |
| 191   | ACADM     | 1864.197225 | 1.624673744 | 0.143674 | 11.30808 | 1.20E-29 | 1.23E-27 |
| 3301  | USP44     | 5.148842637 | 1.623038353 | 0.279151 | 5.814185 | 6.09E-09 | 3.62E-08 |
| 536   | TTC39B    | 184.1366743 | 1.622918753 | 0.170691 | 9.507918 | 1.95E-21 | 7.11E-20 |
| 1597  | ZNF204P   | 210.766248  | 1.622517716 | 0.218482 | 7.426335 | 1.12E-13 | 1.37E-12 |
| 3855  | CCDC150   | 141.8415185 | 1.622359479 | 0.298817 | 5.429274 | 5.66E-08 | 2.88E-07 |
| 814   | ABCC4     | 1767.082443 | 1.621682376 | 0.185923 | 8.722334 | 2.73E-18 | 6.56E-17 |
| 1381  | PPFIBP2   | 951.8688486 | 1.621391832 | 0.209303 | 7.746638 | 9.44E-15 | 1.34E-13 |
| 9027  | KCTD8     | 1.678594382 | 1.620255873 | 0.539436 | 3.003612 | 0.002668 | 0.005793 |
| 4724  | ARHGAP8   | 154.9781921 | 1.619399639 | 0.329103 | 4.920645 | 8.63E-07 | 3.58E-06 |
| 1325  | IQGAP2    | 1325.079544 | 1.617787114 | 0.206619 | 7.829827 | 4.89E-15 | 7.22E-14 |
| 6868  | CECR2     | 22.13760229 | 1.614864261 | 0.416629 | 3.876027 | 0.000106 | 0.000303 |
| 1702  | PLS1      | 767.0801417 | 1.613601697 | 0.22124  | 7.293459 | 3.02E-13 | 3.48E-12 |
| 6188  | A1CF      | 137.929169  | 1.61275977  | 0.385729 | 4.181066 | 2.90E-05 | 9.19E-05 |
| 6955  | OC1001278 | 5.262317907 | 1.612355683 | 0.419479 | 3.843706 | 0.000121 | 0.000342 |
| 2637  | C8orf79   | 254.527697  | 1.612067884 | 0.254393 | 6.336915 | 2.34E-10 | 1.74E-09 |
| 2523  | AHCYL2    | 1258.67014  | 1.610983904 | 0.249995 | 6.444072 | 1.16E-10 | 9.03E-10 |
| 6139  | RIMBP2    | 8.919750458 | 1.609363548 | 0.382688 | 4.205415 | 2.61E-05 | 8.32E-05 |
| 1587  | SH2D4A    | 329.1997779 | 1.607356826 | 0.216062 | 7.439341 | 1.01E-13 | 1.25E-12 |
| 3967  | FAM190A   | 29.76371386 | 1.60685863  | 0.299666 | 5.362169 | 8.22E-08 | 4.06E-07 |
| 747   | BRP44L    | 996.5377643 | 1.606817369 | 0.180549 | 8.899609 | 5.60E-19 | 1.47E-17 |
| 5885  | RERGL     | 47.89287933 | 1.606272677 | 0.370925 | 4.330455 | 1.49E-05 | 4.96E-05 |
| 639   | DDAH1     | 3356.837729 | 1.605943794 | 0.174648 | 9.195306 | 3.74E-20 | 1.15E-18 |
| 2970  | C4orf19   | 359.6163999 | 1.605880895 | 0.265159 | 6.056301 | 1.39E-09 | 9.19E-09 |
| 10755 | C15orf55  | 0.452768072 | 1.6052422   | 0.674583 | 2.379607 | 0.017331 | 0.031586 |
| 165   | HIBCH     | 905.060949  | 1.604436452 | 0.13864  | 11.57265 | 5.67E-31 | 6.74E-29 |
| 4300  | SHROOM3   | 661.825381  | 1.604191147 | 0.311104 | 5.15644  | 2.52E-07 | 1.15E-06 |
| 2629  | SPARCL1   | 14842.21    | 1.60339695  | 0.252405 | 6.352467 | 2.12E-10 | 1.58E-09 |
| 4244  | CRIP3     | 19.44523219 | 1.6019267   | 0.308943 | 5.185184 | 2.16E-07 | 9.97E-07 |
| 995   | PLCL2     | 586.7604333 | 1.60151069  | 0.191665 | 8.355793 | 6.50E-17 | 1.28E-15 |
| 13567 | CER1      | 0.292302664 | 1.600789041 | 1.092745 | 1.464924 | 0.142942 | 0.206516 |
| 683   | CAB39L    | 373.4463783 | 1.600066856 | 0.176722 | 9.054164 | 1.38E-19 | 3.95E-18 |
| 9998  | MOGAT1    | 1.901612005 | 1.600026307 | 0.603002 | 2.653433 | 0.007968 | 0.015621 |
| 3526  | CDH1      | 2821.015536 | 1.598815922 | 0.282732 | 5.654885 | 1.56E-08 | 8.67E-08 |
| 6268  | TTLL10    | 2.153987056 | 1.598319565 | 0.385282 | 4.148444 | 3.35E-05 | 0.000105 |
| 1098  | PDP2      | 149.1732675 | 1.597066307 | 0.195662 | 8.162392 | 3.28E-16 | 5.86E-15 |
| 4738  | OSTalpha  | 91.51981649 | 1.596756289 | 0.324801 | 4.9161   | 8.83E-07 | 3.65E-06 |
| 955   | NDRG2     | 2121.787184 | 1.595525079 | 0.189158 | 8.434859 | 3.32E-17 | 6.81E-16 |
| 5785  | ELAVL3    | 7.70239939  | 1.593113518 | 0.363815 | 4.378908 | 1.19E-05 | 4.04E-05 |
| 4267  | HRH2      | 257.1681169 | 1.590225063 | 0.307451 | 5.172286 | 2.31E-07 | 1.06E-06 |
| 511   | IMPA2     | 2811.661769 | 1.590050484 | 0.166325 | 9.559893 | 1.18E-21 | 4.52E-20 |
| 3852  | C12orf34  | 106.3671132 | 1.589949503 | 0.292689 | 5.432214 | 5.57E-08 | 2.83E-07 |
| 106   | ZNRF3     | 615.6228988 | 1.588892639 | 0.130041 | 12.21844 | 2.48E-34 | 4.58E-32 |
| 4942  | PCDHGB5   | 151.3111909 | 1.588187497 | 0.33064  | 4.803376 | 1.56E-06 | 6.19E-06 |
| 5457  | LIPC      | 435.9914742 | 1.58430591  | 0.348974 | 4.539897 | 5.63E-06 | 2.02E-05 |
| 310   | ARHGAP24  | 1366.348836 | 1.583421887 | 0.151124 | 10.47764 | 1.09E-25 | 6.92E-24 |

|       |           |             |             |          |          |          |          |
|-------|-----------|-------------|-------------|----------|----------|----------|----------|
| 3819  | CGN       | 308.9218592 | 1.582934239 | 0.290028 | 5.457875 | 4.82E-08 | 2.47E-07 |
| 5765  | UST       | 201.2323288 | 1.5827596   | 0.360632 | 4.388847 | 1.14E-05 | 3.87E-05 |
| 828   | ALDH5A1   | 924.9356337 | 1.582699372 | 0.182328 | 8.680511 | 3.94E-18 | 9.33E-17 |
| 392   | MEGF9     | 1121.153678 | 1.578977332 | 0.156528 | 10.0875  | 6.27E-24 | 3.14E-22 |
| 5624  | NLRP6     | 55.83520964 | 1.575927475 | 0.353403 | 4.459291 | 8.22E-06 | 2.87E-05 |
| 4429  | MUC4      | 37.63383719 | 1.573040731 | 0.309371 | 5.084635 | 3.68E-07 | 1.63E-06 |
| 3285  | ST3GAL4   | 898.5993541 | 1.57253204  | 0.270004 | 5.824104 | 5.74E-09 | 3.43E-08 |
| 1231  | NCKAP5    | 160.9381486 | 1.572153299 | 0.19736  | 7.965917 | 1.64E-15 | 2.61E-14 |
| 15823 | GFRA4     | 0.35097204  | 1.571507571 | 2.045272 | 0.768361 | 0.442273 | 0.547872 |
| 15045 | FGF19     | 0.371462313 | 1.570393236 | 1.580745 | 0.993451 | 0.32049  | 0.417543 |
| 2007  | MARVELD   | 178.0722946 | 1.569007033 | 0.225752 | 6.950147 | 3.65E-12 | 3.56E-11 |
| 2072  | SDPR      | 1768.759993 | 1.568028831 | 0.22803  | 6.876425 | 6.14E-12 | 5.81E-11 |
| 4787  | PLAG1     | 60.15743766 | 1.567991295 | 0.3205   | 4.892327 | 9.97E-07 | 4.08E-06 |
| 6537  | CCDC151   | 79.9725983  | 1.567455518 | 0.390894 | 4.00992  | 6.07E-05 | 0.000182 |
| 3294  | NPNT      | 1240.904442 | 1.56643004  | 0.269155 | 5.819799 | 5.89E-09 | 3.51E-08 |
| 9254  | CPLX3     | 2.831614462 | 1.566240287 | 0.53712  | 2.915996 | 0.003546 | 0.00751  |
| 9431  | CRNA0011  | 2.348218757 | 1.566079987 | 0.550238 | 2.846186 | 0.004425 | 0.009196 |
| 10940 | FLJ32063  | 0.413378827 | 1.563581928 | 0.677802 | 2.306842 | 0.021064 | 0.037739 |
| 1292  | CDKL2     | 164.6695409 | 1.563468165 | 0.198562 | 7.873966 | 3.44E-15 | 5.21E-14 |
| 6795  | HRASLS5   | 47.31138029 | 1.562834518 | 0.400569 | 3.901535 | 9.56E-05 | 0.000276 |
| 3611  | SCD5      | 509.1352325 | 1.562680135 | 0.278978 | 5.601455 | 2.13E-08 | 1.15E-07 |
| 1553  | SFXN2     | 324.1911018 | 1.561549051 | 0.208525 | 7.488544 | 6.96E-14 | 8.79E-13 |
| 10597 | GPR61     | 1.350775793 | 1.560701272 | 0.640473 | 2.436795 | 0.014818 | 0.027409 |
| 6782  | KCNQ4     | 10.99187295 | 1.559866538 | 0.399374 | 3.905776 | 9.39E-05 | 0.000271 |
| 2025  | RNF180    | 401.5452278 | 1.559430646 | 0.224858 | 6.935187 | 4.06E-12 | 3.93E-11 |
| 251   | ANKRD57   | 760.1305547 | 1.556154541 | 0.143648 | 10.8331  | 2.40E-27 | 1.87E-25 |
| 5751  | HSD17B13  | 16.99578135 | 1.551618045 | 0.352931 | 4.396377 | 1.10E-05 | 3.75E-05 |
| 123   | CRY2      | 1665.998396 | 1.551429425 | 0.129244 | 12.00389 | 3.39E-33 | 5.40E-31 |
| 2748  | EMCN      | 1213.643917 | 1.55110556  | 0.248562 | 6.240305 | 4.37E-10 | 3.12E-09 |
| 2402  | ProSAPiP1 | 439.0199279 | 1.550848815 | 0.23648  | 6.558054 | 5.45E-11 | 4.45E-10 |
| 4502  | CENPV     | 79.53204818 | 1.5505495   | 0.307799 | 5.037546 | 4.72E-07 | 2.05E-06 |
| 7394  | CTSL3     | 4.184353788 | 1.550082957 | 0.423639 | 3.658968 | 0.000253 | 0.000671 |
| 6526  | IYD       | 48.55679154 | 1.54931034  | 0.385867 | 4.015138 | 5.94E-05 | 0.000178 |
| 368   | C12orf49  | 860.7470521 | 1.549098968 | 0.152022 | 10.18995 | 2.20E-24 | 1.17E-22 |
| 6837  | RIC3      | 66.76114852 | 1.548603712 | 0.398633 | 3.884784 | 0.000102 | 0.000294 |
| 166   | ALDH3A2   | 2777.504976 | 1.548574613 | 0.133934 | 11.56222 | 6.40E-31 | 7.56E-29 |
| 9081  | C9orf128  | 1.20454943  | 1.548378881 | 0.518473 | 2.986423 | 0.002823 | 0.006093 |
| 8755  | DDX25     | 2.115739149 | 1.546268016 | 0.498115 | 3.10424  | 0.001908 | 0.004271 |
| 941   | COBLL1    | 1594.935344 | 1.540994512 | 0.182163 | 8.459427 | 2.69E-17 | 5.59E-16 |
| 878   | LMO7      | 1642.339038 | 1.538977519 | 0.179439 | 8.576593 | 9.77E-18 | 2.18E-16 |
| 6625  | LOXHD1    | 25.9546819  | 1.538772315 | 0.387186 | 3.974243 | 7.06E-05 | 0.000209 |
| 12813 | TPPP2     | 0.364641999 | 1.534346398 | 0.902002 | 1.701045 | 0.088935 | 0.13605  |
| 2290  | C6orf217  | 10.45167558 | 1.534150876 | 0.230231 | 6.66353  | 2.67E-11 | 2.29E-10 |
| 4376  | CATSPERC  | 27.65213928 | 1.532867578 | 0.29956  | 5.11706  | 3.10E-07 | 1.39E-06 |
| 5483  | PEBP4     | 3.932937737 | 1.532792095 | 0.338418 | 4.529283 | 5.92E-06 | 2.12E-05 |
| 2891  | KITLG     | 1030.004182 | 1.531110722 | 0.250313 | 6.116787 | 9.55E-10 | 6.47E-09 |
| 855   | CDKL1     | 106.6219421 | 1.529534103 | 0.177213 | 8.631026 | 6.08E-18 | 1.39E-16 |

|       |           |             |             |          |          |          |          |
|-------|-----------|-------------|-------------|----------|----------|----------|----------|
| 883   | LGR4      | 2462.67429  | 1.528104675 | 0.178489 | 8.561326 | 1.12E-17 | 2.48E-16 |
| 1184  | MAGI3     | 306.6270645 | 1.527691449 | 0.189894 | 8.044975 | 8.63E-16 | 1.43E-14 |
| 2521  | BEX5      | 133.1086012 | 1.527648332 | 0.236992 | 6.445991 | 1.15E-10 | 8.93E-10 |
| 5348  | NRG1      | 135.0207107 | 1.52749489  | 0.332495 | 4.594032 | 4.35E-06 | 1.59E-05 |
| 156   | MUT       | 1048.397271 | 1.526856887 | 0.131568 | 11.60504 | 3.89E-31 | 4.88E-29 |
| 6966  | GRM1      | 10.51778243 | 1.526832326 | 0.397546 | 3.840641 | 0.000123 | 0.000345 |
| 3181  | DNASE1L3  | 99.64295485 | 1.52433808  | 0.258627 | 5.893973 | 3.77E-09 | 2.32E-08 |
| 2626  | COBL      | 600.7850674 | 1.522970952 | 0.239716 | 6.353234 | 2.11E-10 | 1.57E-09 |
| 9533  | SLC30A2   | 57.70327455 | 1.52284284  | 0.5429   | 2.805016 | 0.005031 | 0.010345 |
| 3584  | RNF43     | 93.92391613 | 1.522356498 | 0.271074 | 5.616028 | 1.95E-08 | 1.07E-07 |
| 3600  | PRUNE2    | 5262.122088 | 1.51838072  | 0.270887 | 5.605216 | 2.08E-08 | 1.13E-07 |
| 6137  | UGT2A3    | 2767.76612  | 1.515324392 | 0.360306 | 4.205654 | 2.60E-05 | 8.31E-05 |
| 15129 | ADIG      | 0.315756367 | 1.514796524 | 1.569959 | 0.964864 | 0.334613 | 0.433522 |
| 728   | ENPP4     | 1092.607162 | 1.51422638  | 0.169264 | 8.945965 | 3.69E-19 | 9.93E-18 |
| 6453  | DC1002407 | 4.35482739  | 1.51270033  | 0.373721 | 4.047675 | 5.17E-05 | 0.000157 |
| 2322  | RCAN1     | 3167.565026 | 1.512644588 | 0.22783  | 6.639352 | 3.15E-11 | 2.66E-10 |
| 3406  | CDC42BPC  | 127.3683803 | 1.509300805 | 0.262828 | 5.742533 | 9.33E-09 | 5.37E-08 |
| 9279  | FOXJ1     | 18.78214607 | 1.508189339 | 0.518901 | 2.906508 | 0.003655 | 0.007721 |
| 10339 | C6orf103  | 0.635823919 | 1.508004844 | 0.595201 | 2.533606 | 0.01129  | 0.021403 |
| 5788  | SLC44A4   | 285.9261855 | 1.507924659 | 0.344373 | 4.378755 | 1.19E-05 | 4.04E-05 |
| 5000  | NOS1AP    | 16.01816113 | 1.507303759 | 0.315711 | 4.774312 | 1.80E-06 | 7.07E-06 |
| 3527  | GATA2     | 315.1311536 | 1.501686803 | 0.265653 | 5.652812 | 1.58E-08 | 8.77E-08 |
| 284   | EPB41L5   | 614.1576075 | 1.500872457 | 0.140914 | 10.651   | 1.73E-26 | 1.19E-24 |
| 1826  | FAM63B    | 433.1823055 | 1.50070347  | 0.209416 | 7.166146 | 7.71E-13 | 8.28E-12 |
| 2653  | B4GALT6   | 217.1988118 | 1.500049571 | 0.237241 | 6.322899 | 2.57E-10 | 1.90E-09 |
| 1783  | DC1003037 | 30.32445587 | 1.498262299 | 0.207964 | 7.204422 | 5.83E-13 | 6.41E-12 |
| 6897  | AGXT2     | 1131.500839 | 1.498006964 | 0.387536 | 3.865462 | 0.000111 | 0.000315 |
| 320   | ZDHHC21   | 197.0118549 | 1.497722717 | 0.143399 | 10.44441 | 1.55E-25 | 9.52E-24 |
| 71    | ETFDH     | 798.6613298 | 1.496847461 | 0.117986 | 12.68666 | 7.01E-37 | 1.94E-34 |
| 9366  | CNGB1     | 2.395299309 | 1.496346238 | 0.520697 | 2.873736 | 0.004056 | 0.008489 |
| 2203  | DHRS7     | 2508.923046 | 1.493750871 | 0.221249 | 6.751461 | 1.46E-11 | 1.30E-10 |
| 4607  | EPCAM     | 1314.748375 | 1.493534556 | 0.299539 | 4.986107 | 6.16E-07 | 2.62E-06 |
| 3366  | C7orf10   | 177.4683955 | 1.492635619 | 0.258778 | 5.768006 | 8.02E-09 | 4.67E-08 |
| 9251  | C9orf79   | 0.54223194  | 1.492392505 | 0.51155  | 2.917393 | 0.00353  | 0.007479 |
| 7536  | LOC221122 | 1.925472313 | 1.491899289 | 0.414323 | 3.600813 | 0.000317 | 0.000825 |
| 10491 | BMP5      | 10.32960481 | 1.491559105 | 0.602827 | 2.474273 | 0.013351 | 0.024944 |
| 10057 | ARPP21    | 10.62200417 | 1.487124088 | 0.564758 | 2.633206 | 0.008458 | 0.016485 |
| 293   | CAT       | 4230.385827 | 1.487036686 | 0.140173 | 10.60861 | 2.72E-26 | 1.82E-24 |
| 8346  | PCDH20    | 47.64135554 | 1.485378699 | 0.453532 | 3.275139 | 0.001056 | 0.00248  |
| 7333  | MGC14436  | 4.765038812 | 1.484897909 | 0.402668 | 3.687648 | 0.000226 | 0.000605 |
| 6598  | ATP2B2    | 383.2206232 | 1.482925365 | 0.372227 | 3.983925 | 6.78E-05 | 0.000201 |
| 7868  | MB        | 15.01168495 | 1.482259486 | 0.42784  | 3.464514 | 0.000531 | 0.001323 |
| 4711  | AJAP1     | 92.32330711 | 1.480723548 | 0.30046  | 4.928183 | 8.30E-07 | 3.45E-06 |
| 10657 | KRTAP5-7  | 0.953039534 | 1.480482521 | 0.614117 | 2.410749 | 0.01592  | 0.029281 |
| 9105  | CYP4Z1    | 0.95743345  | 1.480086486 | 0.497416 | 2.975551 | 0.002925 | 0.006296 |
| 10506 | C8orf56   | 2.645767542 | 1.479219354 | 0.598999 | 2.469487 | 0.013531 | 0.025244 |
| 3320  | IQUB      | 64.41028631 | 1.479024411 | 0.254846 | 5.803593 | 6.49E-09 | 3.83E-08 |

|       |           |             |             |          |          |          |          |
|-------|-----------|-------------|-------------|----------|----------|----------|----------|
| 1640  | PBX1      | 1131.682217 | 1.4779507   | 0.200439 | 7.373575 | 1.66E-13 | 1.99E-12 |
| 1018  | EML5      | 51.26239976 | 1.477012122 | 0.177799 | 8.307186 | 9.80E-17 | 1.89E-15 |
| 4891  | HEATR4    | 5.733131631 | 1.476953933 | 0.305624 | 4.83259  | 1.35E-06 | 5.40E-06 |
| 5412  | C9orf173  | 4.377317876 | 1.476777775 | 0.323867 | 4.55983  | 5.12E-06 | 1.85E-05 |
| 13117 | C20orf70  | 1.117309944 | 1.474899943 | 0.918205 | 1.606285 | 0.108211 | 0.161702 |
| 12249 | CADM2     | 0.932206726 | 1.471961924 | 0.782154 | 1.881934 | 0.059845 | 0.095757 |
| 347   | ZNF684    | 102.2192724 | 1.471492444 | 0.142779 | 10.30607 | 6.62E-25 | 3.74E-23 |
| 323   | PPAP2B    | 5731.34766  | 1.470767711 | 0.14088  | 10.43985 | 1.63E-25 | 9.90E-24 |
| 9709  | LIX1      | 91.35107324 | 1.470553751 | 0.535753 | 2.744833 | 0.006054 | 0.012222 |
| 7706  | GAS2      | 132.0950181 | 1.468410496 | 0.415007 | 3.538279 | 0.000403 | 0.001024 |
| 5919  | ABARAPL   | 2.302508579 | 1.467477631 | 0.340209 | 4.313462 | 1.61E-05 | 5.32E-05 |
| 1920  | EPHA4     | 376.6035944 | 1.465348372 | 0.207318 | 7.068134 | 1.57E-12 | 1.60E-11 |
| 7642  | FNFAIP8L  | 254.7202898 | 1.464646348 | 0.410936 | 3.564172 | 0.000365 | 0.000936 |
| 2611  | LOC44104  | 16.76941414 | 1.461475978 | 0.229552 | 6.366647 | 1.93E-10 | 1.45E-09 |
| 7400  | DDC       | 1339.335067 | 1.460453448 | 0.399383 | 3.656777 | 0.000255 | 0.000677 |
| 2652  | SPATA18   | 870.1009159 | 1.459218972 | 0.230773 | 6.323176 | 2.56E-10 | 1.89E-09 |
| 4374  | ILDR1     | 185.9489678 | 1.457302226 | 0.284721 | 5.11835  | 3.08E-07 | 1.38E-06 |
| 3021  | FUT1      | 135.3742499 | 1.453210072 | 0.241461 | 6.018399 | 1.76E-09 | 1.14E-08 |
| 10675 | OR10Q1    | 0.667876785 | 1.453194257 | 0.604522 | 2.403873 | 0.016222 | 0.029787 |
| 1097  | USP51     | 89.95482993 | 1.45275591  | 0.177915 | 8.165453 | 3.20E-16 | 5.72E-15 |
| 7259  | SYT17     | 183.2529128 | 1.45264565  | 0.390245 | 3.722392 | 0.000197 | 0.000533 |
| 4664  | HSD3B2    | 11.88828049 | 1.452435253 | 0.29316  | 4.954414 | 7.25E-07 | 3.05E-06 |
| 12177 | MIMT1     | 0.39168289  | 1.452148532 | 0.762935 | 1.903372 | 0.056992 | 0.091739 |
| 178   | MYO6      | 2314.642201 | 1.451130928 | 0.127132 | 11.41434 | 3.55E-30 | 3.90E-28 |
| 5458  | ADCY1     | 253.4191945 | 1.451112806 | 0.319647 | 4.539741 | 5.63E-06 | 2.02E-05 |
| 227   | SYNJ2BP   | 1406.420773 | 1.450604518 | 0.131984 | 10.99073 | 4.23E-28 | 3.66E-26 |
| 202   | CPT1A     | 2784.718751 | 1.450154783 | 0.12946  | 11.20157 | 4.01E-29 | 3.89E-27 |
| 840   | KRBA2     | 82.08215618 | 1.450123015 | 0.167639 | 8.65025  | 5.14E-18 | 1.20E-16 |
| 148   | MPP5      | 991.4013543 | 1.449543318 | 0.124408 | 11.65152 | 2.25E-31 | 2.99E-29 |
| 8035  | PAK6      | 55.92444282 | 1.449350164 | 0.426655 | 3.397008 | 0.000681 | 0.001662 |
| 224   | INADL     | 1942.173581 | 1.447543298 | 0.131579 | 11.00133 | 3.77E-28 | 3.29E-26 |
| 15278 | CA5A      | 0.280595793 | 1.447290569 | 1.562732 | 0.926128 | 0.354379 | 0.454629 |
| 2812  | PBLD      | 1808.798369 | 1.44595459  | 0.234025 | 6.178623 | 6.47E-10 | 4.51E-09 |
| 865   | STXBP1    | 943.9600637 | 1.445637511 | 0.167856 | 8.612351 | 7.16E-18 | 1.62E-16 |
| 7780  | CD300LG   | 50.68687248 | 1.442279896 | 0.411184 | 3.507625 | 0.000452 | 0.001139 |
| 2327  | MFAP3L    | 1037.803274 | 1.441488128 | 0.217371 | 6.631457 | 3.32E-11 | 2.80E-10 |
| 14787 | CRH       | 0.730666039 | 1.438339467 | 1.342556 | 1.071344 | 0.284015 | 0.376478 |
| 7664  | BCL2L10   | 10.37471565 | 1.438291864 | 0.404821 | 3.552907 | 0.000381 | 0.000974 |
| 489   | SLC25A30  | 1095.130871 | 1.438161011 | 0.148872 | 9.660392 | 4.44E-22 | 1.78E-20 |
| 7374  | CRHR2     | 2.558293503 | 1.437634125 | 0.391829 | 3.669036 | 0.000243 | 0.000647 |
| 1041  | DNAJC28   | 37.65200213 | 1.437244687 | 0.17409  | 8.255751 | 1.51E-16 | 2.84E-15 |
| 10571 | KRTAP5-2  | 0.9380923   | 1.436765949 | 0.587164 | 2.446958 | 0.014407 | 0.026713 |
| 7028  | PLIN5     | 78.19555864 | 1.436371684 | 0.377074 | 3.809254 | 0.000139 | 0.000389 |
| 4878  | NORD116-  | 57.39120564 | 1.434838951 | 0.296246 | 4.843407 | 1.28E-06 | 5.13E-06 |
| 2145  | C6orf27   | 80.82388248 | 1.43468797  | 0.210598 | 6.81244  | 9.60E-12 | 8.77E-11 |
| 4814  | DPY19L2P  | 13.68964323 | 1.433161561 | 0.293582 | 4.881644 | 1.05E-06 | 4.28E-06 |
| 5227  | LOC157381 | 2.980550357 | 1.431709498 | 0.306882 | 4.665341 | 3.08E-06 | 1.16E-05 |

|       |            |             |             |          |          |          |          |
|-------|------------|-------------|-------------|----------|----------|----------|----------|
| 7615  | C11orf90   | 1.627013604 | 1.431592489 | 0.400362 | 3.57575  | 0.000349 | 0.000899 |
| 12377 | ATP13A5    | 0.459553341 | 1.429686737 | 0.775942 | 1.842517 | 0.0654   | 0.103565 |
| 5170  | CLDN10     | 523.8412077 | 1.42863302  | 0.3046   | 4.690192 | 2.73E-06 | 1.03E-05 |
| 4769  | CLUL1      | 10.10515427 | 1.428281355 | 0.291597 | 4.898128 | 9.68E-07 | 3.98E-06 |
| 11546 | TMC3       | 1.071686454 | 1.427002553 | 0.679839 | 2.09903  | 0.035814 | 0.0608   |
| 1608  | CPEB4      | 2185.955124 | 1.426903617 | 0.192455 | 7.414225 | 1.22E-13 | 1.49E-12 |
| 6940  | CAPN13     | 48.72443647 | 1.423709097 | 0.370016 | 3.8477   | 0.000119 | 0.000337 |
| 12285 | DAPL1      | 17.70545999 | 1.421793188 | 0.76017  | 1.870362 | 0.061434 | 0.098019 |
| 15341 | C13orf39   | 0.337679581 | 1.421616462 | 1.566497 | 0.907513 | 0.364136 | 0.465252 |
| 2018  | MAGI1      | 784.4159749 | 1.420733078 | 0.204735 | 6.939381 | 3.94E-12 | 3.83E-11 |
| 14142 | TACR3      | 0.31720469  | 1.420219216 | 1.114283 | 1.274559 | 0.202466 | 0.28062  |
| 5233  | ELOVL4     | 68.55354426 | 1.419717944 | 0.304583 | 4.661191 | 3.14E-06 | 1.18E-05 |
| 2583  | ARHGAP6    | 498.2784236 | 1.419279229 | 0.221858 | 6.397236 | 1.58E-10 | 1.20E-09 |
| 8692  | TMEM82     | 68.51829544 | 1.419186219 | 0.452871 | 3.133753 | 0.001726 | 0.003892 |
| 820   | ZNF433     | 110.4778992 | 1.418588746 | 0.162838 | 8.711642 | 3.00E-18 | 7.16E-17 |
| 9572  | PRKG2      | 29.03660791 | 1.416846936 | 0.507673 | 2.790867 | 0.005257 | 0.010764 |
| 3427  | CACNA2D1   | 35.56690054 | 1.416663181 | 0.247499 | 5.723912 | 1.04E-08 | 5.95E-08 |
| 1145  | TACC2      | 1014.006608 | 1.416589343 | 0.174983 | 8.09557  | 5.70E-16 | 9.76E-15 |
| 6068  | CNGA1      | 25.64963737 | 1.416032963 | 0.334231 | 4.236693 | 2.27E-05 | 7.33E-05 |
| 1953  | RGN        | 387.8288141 | 1.415475206 | 0.201223 | 7.034369 | 2.00E-12 | 2.01E-11 |
| 5551  | C1QTNF9E   | 4.181382053 | 1.415141063 | 0.314558 | 4.49883  | 6.83E-06 | 2.41E-05 |
| 14508 | C2orf83    | 0.381298217 | 1.41395757  | 1.214706 | 1.164033 | 0.244411 | 0.33021  |
| 5539  | ANK2       | 1927.816363 | 1.413926956 | 0.313996 | 4.503015 | 6.70E-06 | 2.37E-05 |
| 976   | FAM135A    | 631.6496785 | 1.413457282 | 0.168628 | 8.382089 | 5.20E-17 | 1.04E-15 |
| 12914 | DMRT1      | 0.88824395  | 1.411910522 | 0.845964 | 1.668996 | 0.095118 | 0.144371 |
| 7089  | LOC728606  | 1.58769752  | 1.411479838 | 0.372491 | 3.789295 | 0.000151 | 0.000418 |
| 6160  | C19orf77   | 2289.099687 | 1.410933687 | 0.336134 | 4.19753  | 2.70E-05 | 8.59E-05 |
| 7586  | ANXA13     | 485.7086179 | 1.410925762 | 0.393655 | 3.584165 | 0.000338 | 0.000874 |
| 5409  | SDCBP2     | 137.9043009 | 1.40985866  | 0.309177 | 4.560036 | 5.11E-06 | 1.85E-05 |
| 7023  | GABRQ      | 9.099189374 | 1.408680766 | 0.369419 | 3.813237 | 0.000137 | 0.000383 |
| 210   | KIAA0564   | 731.8657728 | 1.4076084   | 0.126674 | 11.11206 | 1.10E-28 | 1.02E-26 |
| 891   | ZNF697     | 404.4377701 | 1.407353308 | 0.164758 | 8.541925 | 1.32E-17 | 2.90E-16 |
| 4729  | ENPP2      | 8283.258969 | 1.407304225 | 0.286109 | 4.918764 | 8.71E-07 | 3.61E-06 |
| 930   | NUDT12     | 772.8833576 | 1.406733423 | 0.165895 | 8.479641 | 2.26E-17 | 4.76E-16 |
| 4004  | LOC90246   | 41.60073611 | 1.406509649 | 0.263448 | 5.338845 | 9.35E-08 | 4.58E-07 |
| 836   | RDH11      | 2977.007664 | 1.406391281 | 0.162317 | 8.664457 | 4.54E-18 | 1.06E-16 |
| 1213  | MOBK12B    | 911.3683943 | 1.406034787 | 0.175748 | 8.000303 | 1.24E-15 | 2.01E-14 |
| 3377  | LOC1001321 | 15.01549727 | 1.405359709 | 0.243897 | 5.762106 | 8.31E-09 | 4.82E-08 |
| 5194  | CDH16      | 5920.607893 | 1.40498196  | 0.300256 | 4.679274 | 2.88E-06 | 1.09E-05 |
| 11074 | ZNF99      | 1.027952391 | 1.404811247 | 0.620202 | 2.265086 | 0.023507 | 0.041608 |
| 3937  | GOLM1      | 5109.777703 | 1.404722241 | 0.261068 | 5.380676 | 7.42E-08 | 3.69E-07 |
| 6531  | SLC7A9     | 323.8765338 | 1.403703878 | 0.34982  | 4.012643 | 6.00E-05 | 0.00018  |
| 7766  | SLC17A2    | 93.70260368 | 1.403609093 | 0.399763 | 3.511103 | 0.000446 | 0.001126 |
| 7282  | CYP3A7     | 54.52000042 | 1.403179191 | 0.378497 | 3.707238 | 0.00021  | 0.000564 |
| 3706  | LRRTM2     | 10.71824498 | 1.402362337 | 0.253429 | 5.533547 | 3.14E-08 | 1.66E-07 |
| 9581  | PIGR       | 4397.300244 | 1.40173205  | 0.502857 | 2.787536 | 0.005311 | 0.010865 |
| 608   | PHYH       | 1415.050342 | 1.40070683  | 0.150708 | 9.294168 | 1.48E-20 | 4.78E-19 |



|       |           |             |             |          |          |          |          |
|-------|-----------|-------------|-------------|----------|----------|----------|----------|
| 4080  | GPLD1     | 16.29503695 | 1.40056692  | 0.264674 | 5.291672 | 1.21E-07 | 5.82E-07 |
| 1574  | ASAH1     | 8130.735045 | 1.399184663 | 0.187494 | 7.462554 | 8.49E-14 | 1.06E-12 |
| 7309  | SLC4A11   | 70.72728991 | 1.399106838 | 0.378379 | 3.69763  | 0.000218 | 0.000584 |
| 10870 | B4GALNT2  | 33.70126731 | 1.396850851 | 0.598785 | 2.33281  | 0.019658 | 0.035448 |
| 1147  | BCL2      | 1840.928032 | 1.394818255 | 0.172386 | 8.091227 | 5.91E-16 | 1.01E-14 |
| 5435  | BDNF      | 65.93373533 | 1.393852622 | 0.306295 | 4.55068  | 5.35E-06 | 1.93E-05 |
| 99    | SUCLA2    | 1041.20946  | 1.392971178 | 0.112956 | 12.33196 | 6.09E-35 | 1.21E-32 |
| 3229  | IMPG1     | 6.171476024 | 1.38953632  | 0.236879 | 5.866008 | 4.46E-09 | 2.71E-08 |
| 1116  | HHAT      | 290.5343548 | 1.38905907  | 0.170672 | 8.138786 | 3.99E-16 | 7.01E-15 |
| 6114  | GPR17     | 16.83092221 | 1.387832569 | 0.329292 | 4.214592 | 2.50E-05 | 8.02E-05 |
| 2478  | RUNDC2A   | 153.7442598 | 1.387542224 | 0.213771 | 6.490775 | 8.54E-11 | 6.75E-10 |
| 9756  | VTN       | 84.70243688 | 1.386674064 | 0.507864 | 2.730402 | 0.006326 | 0.012709 |
| 188   | HSDL2     | 2106.312742 | 1.386470213 | 0.122441 | 11.32356 | 1.00E-29 | 1.05E-27 |
| 7177  | LGSN      | 9.100550732 | 1.385622183 | 0.369206 | 3.752974 | 0.000175 | 0.000477 |
| 163   | OSBPL1A   | 1624.551752 | 1.38135688  | 0.119271 | 11.58169 | 5.10E-31 | 6.14E-29 |
| 10233 | HORMAD2   | 2.220857925 | 1.381193319 | 0.537196 | 2.571118 | 0.010137 | 0.019417 |
| 1739  | CDC14C    | 9.546501196 | 1.381067264 | 0.190413 | 7.253017 | 4.08E-13 | 4.59E-12 |
| 7301  | ANGPT4    | 5.626496365 | 1.378289721 | 0.372534 | 3.69977  | 0.000216 | 0.000579 |
| 4677  | GPR113    | 13.64178428 | 1.37813727  | 0.278641 | 4.945923 | 7.58E-07 | 3.18E-06 |
| 920   | C10orf118 | 471.5002491 | 1.377883391 | 0.162258 | 8.491908 | 2.03E-17 | 4.33E-16 |
| 9079  | C7orf16   | 0.9327423   | 1.37766723  | 0.461223 | 2.98699  | 0.002817 | 0.006083 |
| 8217  | KCNH6     | 52.80934003 | 1.377103626 | 0.414121 | 3.325366 | 0.000883 | 0.002106 |
| 1335  | MSRA      | 506.8471079 | 1.37609049  | 0.176054 | 7.816305 | 5.44E-15 | 7.99E-14 |
| 285   | TMEM192   | 892.5700245 | 1.375446054 | 0.12918  | 10.64753 | 1.79E-26 | 1.23E-24 |
| 4369  | BTBD8     | 10.08001895 | 1.374749887 | 0.268501 | 5.120096 | 3.05E-07 | 1.37E-06 |
| 14837 | PSG8      | 0.905745265 | 1.374331081 | 1.302003 | 1.055552 | 0.291173 | 0.384666 |
| 5943  | CCDC144A  | 36.58412957 | 1.37409783  | 0.319855 | 4.296001 | 1.74E-05 | 5.74E-05 |
| 10058 | FOXA3     | 8.067035352 | 1.373658092 | 0.521713 | 2.632976 | 0.008464 | 0.016495 |
| 1290  | KIAA1161  | 237.4286407 | 1.373226137 | 0.174364 | 7.875635 | 3.39E-15 | 5.15E-14 |
| 7884  | B3GALT1   | 2.67895824  | 1.371909982 | 0.397037 | 3.455368 | 0.00055  | 0.001366 |
| 1515  | WLS       | 1457.053816 | 1.371890522 | 0.181729 | 7.549093 | 4.38E-14 | 5.67E-13 |
| 5494  | SLCO4C1   | 2275.728834 | 1.371578431 | 0.30314  | 4.524577 | 6.05E-06 | 2.16E-05 |
| 4651  | C1QTNF9   | 4.375714146 | 1.370541688 | 0.276311 | 4.960138 | 7.04E-07 | 2.97E-06 |
| 3461  | C11orf93  | 101.0107142 | 1.369521275 | 0.240303 | 5.699132 | 1.20E-08 | 6.82E-08 |
| 1432  | SATB2     | 394.1270024 | 1.368924207 | 0.178672 | 7.661661 | 1.84E-14 | 2.51E-13 |
| 195   | PTAR1     | 1545.511475 | 1.367885524 | 0.121212 | 11.2851  | 1.55E-29 | 1.56E-27 |
| 2287  | ATP11A    | 5545.045051 | 1.367862551 | 0.205182 | 6.66658  | 2.62E-11 | 2.24E-10 |
| 4186  | C6orf186  | 19.15742582 | 1.365657645 | 0.261759 | 5.217231 | 1.82E-07 | 8.50E-07 |
| 1124  | ATP7B     | 395.2128932 | 1.364306611 | 0.167919 | 8.124767 | 4.48E-16 | 7.82E-15 |
| 475   | FANCC     | 432.7277682 | 1.363496203 | 0.140347 | 9.715204 | 2.60E-22 | 1.07E-20 |
| 2446  | ZNF704    | 274.1288747 | 1.362844488 | 0.209222 | 6.513882 | 7.32E-11 | 5.87E-10 |
| 7079  | AVPR1A    | 141.6827578 | 1.362375647 | 0.359289 | 3.79187  | 0.00015  | 0.000414 |
| 471   | MUDENG    | 882.6220131 | 1.361457451 | 0.139846 | 9.735432 | 2.13E-22 | 8.86E-21 |
| 2328  | PFKM      | 1802.707876 | 1.361199163 | 0.20533  | 6.629323 | 3.37E-11 | 2.84E-10 |
| 9776  | TAAR1     | 0.588754231 | 1.360917108 | 0.499651 | 2.723735 | 0.006455 | 0.012942 |
| 2664  | SLC25A5   | 6742.672342 | 1.359234503 | 0.215178 | 6.316784 | 2.67E-10 | 1.96E-09 |
| 7950  | ESPNP     | 4.094527905 | 1.357469371 | 0.395946 | 3.42842  | 0.000607 | 0.001497 |

|       |           |             |             |          |          |          |          |
|-------|-----------|-------------|-------------|----------|----------|----------|----------|
| 3469  | GPC4      | 1190.045447 | 1.356846145 | 0.238243 | 5.695223 | 1.23E-08 | 6.96E-08 |
| 11525 | ELF5      | 3.326245806 | 1.356467944 | 0.643082 | 2.109325 | 0.034917 | 0.059384 |
| 860   | SECISBP2I | 2088.153648 | 1.356325568 | 0.15736  | 8.619274 | 6.74E-18 | 1.54E-16 |
| 5612  | MAN1C1    | 447.0652251 | 1.354537543 | 0.303273 | 4.466392 | 7.95E-06 | 2.78E-05 |
| 2142  | CISH      | 891.0161366 | 1.353974902 | 0.198728 | 6.81321  | 9.54E-12 | 8.73E-11 |
| 2438  | TBC1D1    | 3258.159695 | 1.353089895 | 0.207481 | 6.521507 | 6.96E-11 | 5.60E-10 |
| 881   | ATP5A1    | 11597.94911 | 1.352678122 | 0.157888 | 8.567341 | 1.06E-17 | 2.36E-16 |
| 10265 | SV2C      | 0.506304643 | 1.351055391 | 0.527777 | 2.559899 | 0.01047  | 0.019993 |
| 9840  | G6PC2     | 1.83062145  | 1.350495816 | 0.498919 | 2.706845 | 0.006793 | 0.013531 |
| 7774  | MAEL      | 28.54356054 | 1.34886277  | 0.384419 | 3.508834 | 0.00045  | 0.001135 |
| 3563  | BAMBI     | 447.5830012 | 1.346622082 | 0.239309 | 5.627116 | 1.83E-08 | 1.01E-07 |
| 2798  | ACOX2     | 252.2431326 | 1.346499939 | 0.217443 | 6.192425 | 5.92E-10 | 4.15E-09 |
| 492   | NDUFS1    | 1885.626892 | 1.346050349 | 0.13947  | 9.65119  | 4.86E-22 | 1.94E-20 |
| 552   | PRKCE     | 449.2335127 | 1.344934814 | 0.142249 | 9.454793 | 3.24E-21 | 1.15E-19 |
| 3596  | ZNF471    | 115.0885773 | 1.344558564 | 0.239805 | 5.606873 | 2.06E-08 | 1.12E-07 |
| 8689  | WNT11     | 36.02408033 | 1.343039983 | 0.428377 | 3.135183 | 0.001717 | 0.003874 |
| 2442  | NUAK2     | 481.7101829 | 1.342520583 | 0.206038 | 6.51589  | 7.23E-11 | 5.80E-10 |
| 2851  | GPRC5B    | 1324.138598 | 1.342383905 | 0.218546 | 6.142351 | 8.13E-10 | 5.59E-09 |
| 8255  | SYT7      | 107.8222335 | 1.340980906 | 0.405008 | 3.310999 | 0.00093  | 0.002207 |
| 4832  | CD36      | 3043.774924 | 1.339866323 | 0.274921 | 4.873641 | 1.10E-06 | 4.44E-06 |
| 1062  | ATP6V1D   | 1931.250578 | 1.338673502 | 0.162831 | 8.221243 | 2.01E-16 | 3.72E-15 |
| 4305  | TSPYL3    | 23.30155993 | 1.338002412 | 0.259579 | 5.154512 | 2.54E-07 | 1.16E-06 |
| 1068  | GARNL3    | 133.3239982 | 1.33702349  | 0.162821 | 8.211617 | 2.18E-16 | 4.01E-15 |
| 4079  | ACAD11    | 4547.753977 | 1.336770266 | 0.252596 | 5.292126 | 1.21E-07 | 5.81E-07 |
| 7113  | GALR1     | 8.323614609 | 1.3356097   | 0.353361 | 3.779732 | 0.000157 | 0.000433 |
| 1259  | SACM1L    | 1328.031239 | 1.334186227 | 0.168491 | 7.918433 | 2.41E-15 | 3.74E-14 |
| 7410  | CACNB4    | 82.4092033  | 1.333828893 | 0.365295 | 3.65137  | 0.000261 | 0.00069  |
| 403   | ZNF91     | 421.2319366 | 1.333710651 | 0.133122 | 10.01868 | 1.26E-23 | 6.14E-22 |
| 397   | SESTD1    | 1007.028007 | 1.332453504 | 0.132556 | 10.05201 | 9.00E-24 | 4.44E-22 |
| 5259  | USP2      | 701.2885129 | 1.332275639 | 0.286733 | 4.646392 | 3.38E-06 | 1.26E-05 |
| 7769  | PRRG2     | 38.39164194 | 1.330941931 | 0.379199 | 3.509875 | 0.000448 | 0.001131 |
| 1749  | ECHDC3    | 771.2375834 | 1.330275162 | 0.183585 | 7.246087 | 4.29E-13 | 4.81E-12 |
| 11636 | C6orf222  | 5.561806552 | 1.329125381 | 0.64329  | 2.066137 | 0.038816 | 0.065385 |
| 2718  | RBPMS2    | 296.6812335 | 1.326881117 | 0.211768 | 6.265742 | 3.71E-10 | 2.68E-09 |
| 3234  | C17orf104 | 18.60647408 | 1.326361903 | 0.226222 | 5.863092 | 4.54E-09 | 2.75E-08 |
| 11943 | SLC5A2    | 22.93277669 | 1.326203011 | 0.670431 | 1.978136 | 0.047913 | 0.078636 |
| 4304  | RRH       | 2.366517153 | 1.325513861 | 0.257128 | 5.155083 | 2.54E-07 | 1.15E-06 |
| 2570  | TMEM232   | 46.80784085 | 1.325375594 | 0.206724 | 6.411324 | 1.44E-10 | 1.10E-09 |
| 263   | PPM1A     | 1966.271788 | 1.32455704  | 0.123038 | 10.7654  | 5.01E-27 | 3.74E-25 |
| 6099  | CYP39A1   | 86.94426605 | 1.324199278 | 0.313659 | 4.221777 | 2.42E-05 | 7.79E-05 |
| 3591  | GPRIN3    | 548.7828454 | 1.323332703 | 0.235923 | 5.609165 | 2.03E-08 | 1.11E-07 |
| 1210  | ABCA5     | 637.6775468 | 1.322261849 | 0.165236 | 8.002247 | 1.22E-15 | 1.98E-14 |
| 441   | ARHGAP5   | 2326.270641 | 1.32179395  | 0.134259 | 9.845118 | 7.20E-23 | 3.20E-21 |
| 12505 | OR2G6     | 0.427020747 | 1.32127444  | 0.733044 | 1.802448 | 0.071475 | 0.112034 |
| 14925 | NXF2      | 0.408751722 | 1.319098898 | 1.28248  | 1.028553 | 0.30369  | 0.398835 |
| 7195  | WNT6      | 11.12723249 | 1.316547504 | 0.351233 | 3.748362 | 0.000178 | 0.000485 |
| 868   | TMCC3     | 1133.718142 | 1.31576831  | 0.152904 | 8.605208 | 7.62E-18 | 1.72E-16 |

|       |           |             |             |          |          |          |          |
|-------|-----------|-------------|-------------|----------|----------|----------|----------|
| 642   | PTGR2     | 492.5939445 | 1.315423202 | 0.143199 | 9.186003 | 4.08E-20 | 1.25E-18 |
| 161   | RCBTB1    | 753.2957166 | 1.314893769 | 0.11351  | 11.58393 | 4.97E-31 | 6.05E-29 |
| 12059 | FRMPD4    | 3.146333661 | 1.313624698 | 0.676468 | 1.941888 | 0.052151 | 0.084767 |
| 7862  | LOC201651 | 2.197316491 | 1.313210036 | 0.378853 | 3.466282 | 0.000528 | 0.001316 |
| 4906  | PPM1L     | 190.8360792 | 1.312770995 | 0.272134 | 4.823981 | 1.41E-06 | 5.62E-06 |
| 2035  | PDE7B     | 292.6828995 | 1.312641013 | 0.189618 | 6.922563 | 4.44E-12 | 4.27E-11 |
| 1016  | STRBP     | 441.0930887 | 1.308859744 | 0.157485 | 8.310993 | 9.49E-17 | 1.83E-15 |
| 5522  | PPM1H     | 641.8960312 | 1.307995405 | 0.290028 | 4.509896 | 6.49E-06 | 2.30E-05 |
| 87    | CBR4      | 600.8409435 | 1.30790273  | 0.104889 | 12.46941 | 1.10E-35 | 2.47E-33 |
| 7687  | ALB       | 40.77240457 | 1.306638041 | 0.368665 | 3.544241 | 0.000394 | 0.001004 |
| 5125  | GRIP1     | 87.86654714 | 1.306117974 | 0.277005 | 4.715136 | 2.42E-06 | 9.24E-06 |
| 62    | FBXO3     | 1036.264666 | 1.305487865 | 0.101365 | 12.87903 | 5.91E-38 | 1.87E-35 |
| 8820  | GPR37     | 138.4500724 | 1.305449549 | 0.423558 | 3.082106 | 0.002055 | 0.004568 |
| 13485 | SLC7A13   | 2.087475425 | 1.305430183 | 0.875119 | 1.491718 | 0.135773 | 0.197352 |
| 13619 | RALYL     | 2.63981484  | 1.304777145 | 0.900359 | 1.449174 | 0.147289 | 0.211984 |
| 2817  | ABHD2     | 4660.218423 | 1.304368311 | 0.211329 | 6.172228 | 6.73E-10 | 4.69E-09 |
| 548   | ZNF772    | 182.2738971 | 1.304007477 | 0.137821 | 9.461629 | 3.03E-21 | 1.08E-19 |
| 9985  | SERPINA5  | 607.4024246 | 1.303833895 | 0.490563 | 2.657829 | 0.007865 | 0.015439 |
| 560   | SNX30     | 1101.306703 | 1.302719469 | 0.138063 | 9.435656 | 3.89E-21 | 1.36E-19 |
| 1343  | LIMA1     | 2702.337089 | 1.302346724 | 0.166823 | 7.806753 | 5.87E-15 | 8.56E-14 |
| 3222  | RORC      | 1313.262965 | 1.300747728 | 0.221487 | 5.872783 | 4.29E-09 | 2.61E-08 |
| 1835  | DCLK2     | 279.1615604 | 1.299411657 | 0.181409 | 7.162879 | 7.90E-13 | 8.44E-12 |
| 1131  | PHOSPHO2  | 50.73381037 | 1.298849584 | 0.160034 | 8.116091 | 4.81E-16 | 8.34E-15 |
| 4132  | DSEL      | 604.6607255 | 1.298249892 | 0.246737 | 5.261673 | 1.43E-07 | 6.77E-07 |
| 3136  | WDR17     | 112.5456717 | 1.298167051 | 0.218703 | 5.935758 | 2.92E-09 | 1.83E-08 |
| 470   | VPS13A    | 1219.124402 | 1.29768821  | 0.133276 | 9.736879 | 2.10E-22 | 8.75E-21 |
| 8434  | KCNF1     | 65.05992856 | 1.297122025 | 0.400923 | 3.235338 | 0.001215 | 0.002824 |
| 4834  | STEAP2    | 501.1749881 | 1.295706751 | 0.265887 | 4.873145 | 1.10E-06 | 4.45E-06 |
| 11310 | FAM83F    | 71.76376831 | 1.294392422 | 0.594875 | 2.175908 | 0.029562 | 0.051233 |
| 7314  | RSPH10B2  | 4.837783543 | 1.29248134  | 0.34977  | 3.695235 | 0.00022  | 0.000589 |
| 5952  | CACNA1D   | 258.0940193 | 1.29200991  | 0.301195 | 4.28962  | 1.79E-05 | 5.89E-05 |
| 1894  | ZNF470    | 203.7402398 | 1.291520736 | 0.182123 | 7.091488 | 1.33E-12 | 1.37E-11 |
| 2073  | NR1D2     | 1024.519771 | 1.291101283 | 0.187762 | 6.876276 | 6.14E-12 | 5.81E-11 |
| 2345  | CTAGE1    | 7.638764368 | 1.290395572 | 0.19518  | 6.611311 | 3.81E-11 | 3.18E-10 |
| 2918  | SERPINI1  | 662.7958071 | 1.289772783 | 0.211514 | 6.0978   | 1.08E-09 | 7.22E-09 |
| 6553  | NRXN3     | 287.8262137 | 1.289207983 | 0.321871 | 4.005354 | 6.19E-05 | 0.000185 |
| 15858 | SFTPC     | 0.277511937 | 1.288628643 | 1.704351 | 0.756082 | 0.4496   | 0.55572  |
| 2928  | MYO5B     | 1306.917816 | 1.288153823 | 0.211516 | 6.090099 | 1.13E-09 | 7.55E-09 |
| 9794  | GYPA      | 7.611373962 | 1.287914115 | 0.473728 | 2.718679 | 0.006554 | 0.013117 |
| 8144  | AQP4      | 61.7354576  | 1.286647842 | 0.38344  | 3.355538 | 0.000792 | 0.001906 |
| 3141  | ANKRD29   | 270.9219916 | 1.28660312  | 0.216936 | 5.930796 | 3.01E-09 | 1.88E-08 |
| 7106  | TIMD4     | 166.3469578 | 1.285812263 | 0.339999 | 3.781808 | 0.000156 | 0.000429 |
| 4204  | CD9       | 6516.400063 | 1.285263137 | 0.246883 | 5.20597  | 1.93E-07 | 9.00E-07 |
| 2292  | LIMCH1    | 2001.028187 | 1.284188295 | 0.192746 | 6.662609 | 2.69E-11 | 2.30E-10 |
| 742   | AMD1      | 2821.966387 | 1.283558042 | 0.14402  | 8.912365 | 5.00E-19 | 1.32E-17 |
| 7413  | ANKS4B    | 289.6027624 | 1.283520951 | 0.351612 | 3.650389 | 0.000262 | 0.000692 |
| 12681 | KRT85     | 0.592665767 | 1.283181712 | 0.735979 | 1.743503 | 0.081246 | 0.125581 |

|       |           |             |             |          |          |          |          |
|-------|-----------|-------------|-------------|----------|----------|----------|----------|
| 15642 | OPALIN    | 0.289392979 | 1.282881697 | 1.556675 | 0.824117 | 0.409873 | 0.513579 |
| 1178  | IDH3A     | 1512.93708  | 1.282771149 | 0.159275 | 8.053791 | 8.03E-16 | 1.34E-14 |
| 10459 | C15orf56  | 7.95307688  | 1.282746544 | 0.515224 | 2.489687 | 0.012786 | 0.023961 |
| 3011  | TTC9      | 157.1833683 | 1.282598465 | 0.212815 | 6.026837 | 1.67E-09 | 1.09E-08 |
| 998   | CFL2      | 1300.15142  | 1.281015609 | 0.153403 | 8.350639 | 6.79E-17 | 1.33E-15 |
| 9227  | MYO3B     | 37.70554911 | 1.280850173 | 0.437367 | 2.92855  | 0.003405 | 0.007234 |
| 6480  | ANO3      | 66.70728111 | 1.280653741 | 0.317283 | 4.036308 | 5.43E-05 | 0.000164 |
| 12133 | CD164L2   | 2.029120563 | 1.280640905 | 0.668158 | 1.916673 | 0.055279 | 0.089305 |
| 7207  | CNDP1     | 18.71656238 | 1.279910699 | 0.342134 | 3.740966 | 0.000183 | 0.000499 |
| 9085  | OR2C1     | 0.79277811  | 1.279093798 | 0.428541 | 2.984767 | 0.002838 | 0.006123 |
| 8161  | LOC646982 | 2.733196836 | 1.277584719 | 0.381652 | 3.347514 | 0.000815 | 0.001958 |
| 2064  | ZNF323    | 225.8094647 | 1.277120852 | 0.185521 | 6.883975 | 5.82E-12 | 5.53E-11 |
| 8688  | NPTX1     | 17.48054242 | 1.276976172 | 0.4073   | 3.135221 | 0.001717 | 0.003874 |
| 1069  | AMOT      | 959.2426098 | 1.276204717 | 0.155517 | 8.206212 | 2.28E-16 | 4.18E-15 |
| 7140  | C6orf223  | 885.6395055 | 1.275784588 | 0.338654 | 3.76722  | 0.000165 | 0.000453 |
| 5180  | NR6A1     | 6.003068844 | 1.275356562 | 0.272255 | 4.684427 | 2.81E-06 | 1.06E-05 |
| 8335  | BDH1      | 309.2162932 | 1.274228977 | 0.388652 | 3.27859  | 0.001043 | 0.002453 |
| 1733  | ZBTB10    | 714.9221596 | 1.273747508 | 0.175383 | 7.262671 | 3.80E-13 | 4.29E-12 |
| 1168  | MYEF2     | 691.6629872 | 1.272860114 | 0.157825 | 8.065003 | 7.32E-16 | 1.23E-14 |
| 13604 | TTY4C     | 2.917905453 | 1.272704695 | 0.87447  | 1.455402 | 0.145558 | 0.20973  |
| 4401  | SLC1A1    | 1392.554171 | 1.271338348 | 0.249155 | 5.102602 | 3.35E-07 | 1.49E-06 |
| 7442  | ACMSD     | 1072.193725 | 1.270985239 | 0.349232 | 3.639369 | 0.000273 | 0.00072  |
| 4251  | CCDC64    | 870.8481528 | 1.270866802 | 0.245284 | 5.181196 | 2.20E-07 | 1.02E-06 |
| 5470  | C1orf226  | 102.375577  | 1.270082246 | 0.280131 | 4.533887 | 5.79E-06 | 2.08E-05 |
| 8113  | SERPINA6  | 538.6640376 | 1.269729884 | 0.377362 | 3.364752 | 0.000766 | 0.001851 |
| 10709 | FOLR3     | 6.752331503 | 1.269446799 | 0.530266 | 2.393979 | 0.016667 | 0.030506 |
| 373   | TJP2      | 1638.577692 | 1.268631345 | 0.124909 | 10.15642 | 3.10E-24 | 1.63E-22 |
| 11029 | TRPM5     | 0.616395085 | 1.267950856 | 0.556038 | 2.280332 | 0.022588 | 0.040144 |
| 7265  | CASQ2     | 122.5374512 | 1.267489369 | 0.340893 | 3.718147 | 0.000201 | 0.000541 |
| 5093  | RASSF6    | 706.9076097 | 1.265141409 | 0.267511 | 4.729302 | 2.25E-06 | 8.67E-06 |
| 4034  | LRRK2     | 3085.302356 | 1.262650298 | 0.237544 | 5.315446 | 1.06E-07 | 5.17E-07 |
| 5341  | MARVELD   | 120.7921473 | 1.262083074 | 0.274367 | 4.599979 | 4.23E-06 | 1.55E-05 |
| 11323 | LOC285780 | 0.70270839  | 1.261900806 | 0.580781 | 2.172764 | 0.029798 | 0.051583 |
| 715   | SDHD      | 2723.592544 | 1.261170327 | 0.140526 | 8.974667 | 2.84E-19 | 7.79E-18 |
| 2495  | CYFIP2    | 4162.124899 | 1.260331069 | 0.1948   | 6.469862 | 9.81E-11 | 7.71E-10 |
| 2192  | TNFRSF21  | 2576.916185 | 1.259139674 | 0.186043 | 6.767999 | 1.31E-11 | 1.17E-10 |
| 1590  | KGFLP2    | 151.2844009 | 1.259070483 | 0.169343 | 7.43505  | 1.05E-13 | 1.29E-12 |
| 3236  | CMBL      | 5010.773082 | 1.257843779 | 0.214563 | 5.862363 | 4.56E-09 | 2.76E-08 |
| 4308  | CCDC85A   | 183.8942177 | 1.257794111 | 0.244036 | 5.15414  | 2.55E-07 | 1.16E-06 |
| 8666  | CHST9     | 337.698659  | 1.257056084 | 0.39967  | 3.145233 | 0.00166  | 0.003754 |
| 3692  | PTPRB     | 2463.71153  | 1.25666373  | 0.226892 | 5.53859  | 3.05E-08 | 1.62E-07 |
| 5730  | RAB19     | 15.62972392 | 1.255624904 | 0.28487  | 4.407712 | 1.04E-05 | 3.57E-05 |
| 1347  | CPEB3     | 219.4336275 | 1.254205855 | 0.160734 | 7.802992 | 6.05E-15 | 8.80E-14 |
| 1981  | KIAA1958  | 113.972756  | 1.253599236 | 0.179348 | 6.989764 | 2.75E-12 | 2.72E-11 |
| 1658  | SH3YL1    | 1147.505823 | 1.253434395 | 0.170622 | 7.346274 | 2.04E-13 | 2.41E-12 |
| 12154 | KCNA1     | 1.185292984 | 1.253398773 | 0.656519 | 1.909157 | 0.056242 | 0.090702 |
| 4827  | LOC342346 | 8.963946141 | 1.252939591 | 0.256908 | 4.876992 | 1.08E-06 | 4.37E-06 |

|       |           |             |             |          |          |          |          |
|-------|-----------|-------------|-------------|----------|----------|----------|----------|
| 8513  | MTUS2     | 26.59788678 | 1.25276348  | 0.391524 | 3.199714 | 0.001376 | 0.003167 |
| 1499  | MYO9A     | 854.9246271 | 1.251831445 | 0.165376 | 7.569603 | 3.74E-14 | 4.90E-13 |
| 5496  | FZD9      | 7.008374844 | 1.251824597 | 0.276697 | 4.524168 | 6.06E-06 | 2.16E-05 |
| 5421  | CRYM      | 271.3475037 | 1.251749002 | 0.274759 | 4.5558   | 5.22E-06 | 1.89E-05 |
| 9145  | SCN2A     | 36.00587669 | 1.250698882 | 0.422501 | 2.960226 | 0.003074 | 0.006589 |
| 11478 | PCDH11Y   | 2.349092145 | 1.246913546 | 0.586065 | 2.127602 | 0.03337  | 0.056986 |
| 3637  | ITPR2     | 1678.047047 | 1.246808692 | 0.223475 | 5.579176 | 2.42E-08 | 1.30E-07 |
| 5111  | NEAT1     | 18381.32343 | 1.246136725 | 0.263849 | 4.722908 | 2.32E-06 | 8.92E-06 |
| 2915  | FAM134B   | 2871.166043 | 1.246094577 | 0.204268 | 6.10029  | 1.06E-09 | 7.12E-09 |
| 2288  | LARS2     | 469.2957587 | 1.246051161 | 0.186928 | 6.665949 | 2.63E-11 | 2.25E-10 |
| 1800  | METTL7A   | 4427.158065 | 1.245569297 | 0.173179 | 7.192368 | 6.37E-13 | 6.93E-12 |
| 9972  | IZUMO1    | 1.133898379 | 1.245237944 | 0.467669 | 2.662647 | 0.007753 | 0.015239 |
| 724   | LNK2      | 537.3911274 | 1.245195601 | 0.139056 | 8.954657 | 3.41E-19 | 9.23E-18 |
| 7907  | HIST3H2A  | 22.7572347  | 1.245088465 | 0.36139  | 3.445277 | 0.00057  | 0.001414 |
| 735   | RALGAP1   | 495.7870146 | 1.244861606 | 0.13943  | 8.928189 | 4.33E-19 | 1.15E-17 |
| 13294 | IFITM5    | 0.92852447  | 1.244853897 | 0.805498 | 1.545447 | 0.122238 | 0.180236 |
| 2152  | ERMP1     | 1318.168164 | 1.243843372 | 0.182704 | 6.807958 | 9.90E-12 | 9.02E-11 |
| 12182 | HIST1H3A  | 0.389334502 | 1.243532147 | 0.653807 | 1.901987 | 0.057173 | 0.091992 |
| 9324  | DLGAP1    | 11.10422469 | 1.243237122 | 0.430042 | 2.890968 | 0.003841 | 0.008074 |
| 2519  | MFSD4     | 246.8350321 | 1.241802205 | 0.192624 | 6.446752 | 1.14E-10 | 8.89E-10 |
| 4066  | KLHDC7A   | 1008.625882 | 1.240938304 | 0.234253 | 5.297438 | 1.17E-07 | 5.66E-07 |
| 681   | LRP6      | 992.6491737 | 1.240553985 | 0.136918 | 9.060545 | 1.30E-19 | 3.74E-18 |
| 7885  | BHMT      | 5416.236192 | 1.24012521  | 0.358917 | 3.455183 | 0.00055  | 0.001367 |
| 6561  | KCNQ5     | 24.89260215 | 1.23976284  | 0.309835 | 4.001358 | 6.30E-05 | 0.000188 |
| 401   | TSPYL1    | 2887.503522 | 1.238705032 | 0.123635 | 10.01907 | 1.26E-23 | 6.14E-22 |
| 6179  | AIF1L     | 2452.967172 | 1.237803417 | 0.295719 | 4.185746 | 2.84E-05 | 9.02E-05 |
| 1044  | TOM1L1    | 1165.460314 | 1.236522071 | 0.149955 | 8.245928 | 1.64E-16 | 3.08E-15 |
| 11220 | SERPINB7  | 3.513657645 | 1.236121223 | 0.558394 | 2.213709 | 0.026849 | 0.046904 |
| 4031  | KDR       | 4283.449506 | 1.23564576  | 0.232392 | 5.317066 | 1.05E-07 | 5.13E-07 |
| 15252 | KRT84     | 0.457617469 | 1.234430843 | 1.324199 | 0.932209 | 0.351228 | 0.451361 |
| 699   | BRMS1L    | 220.8336984 | 1.233408579 | 0.136637 | 9.026869 | 1.77E-19 | 4.95E-18 |
| 3987  | LOC115110 | 300.6126906 | 1.233149911 | 0.230446 | 5.351145 | 8.74E-08 | 4.30E-07 |
| 5830  | FGF12     | 77.38235432 | 1.23286046  | 0.283022 | 4.356061 | 1.32E-05 | 4.45E-05 |
| 11091 | USH1G     | 5.63461158  | 1.232690229 | 0.545889 | 2.258132 | 0.023937 | 0.042304 |
| 6894  | LOC401431 | 60.33335656 | 1.232394621 | 0.318755 | 3.866278 | 0.000111 | 0.000314 |
| 3176  | NBEAL1    | 274.0935555 | 1.231915862 | 0.208909 | 5.896896 | 3.70E-09 | 2.29E-08 |
| 10544 | SMCR5     | 0.894154033 | 1.23182818  | 0.501815 | 2.454746 | 0.014098 | 0.026209 |
| 1109  | SLC44A3   | 783.0768461 | 1.23074234  | 0.150999 | 8.150658 | 3.62E-16 | 6.40E-15 |
| 11878 | SLC5A7    | 1.267412726 | 1.229773649 | 0.615852 | 1.996866 | 0.04584  | 0.075645 |
| 5206  | HIST1H2BC | 115.9644413 | 1.228605554 | 0.262827 | 4.67457  | 2.95E-06 | 1.11E-05 |
| 1288  | PTPN21    | 511.9392562 | 1.22848434  | 0.155959 | 7.876992 | 3.35E-15 | 5.10E-14 |
| 4620  | GPR116    | 5527.337402 | 1.228011155 | 0.246594 | 4.979893 | 6.36E-07 | 2.70E-06 |
| 12342 | OR2T5     | 1.025773665 | 1.22722757  | 0.663023 | 1.850956 | 0.064176 | 0.101921 |
| 690   | SLC30A9   | 2029.502005 | 1.225508836 | 0.135561 | 9.040248 | 1.56E-19 | 4.44E-18 |
| 13628 | TMPRSS12  | 0.338682651 | 1.225054955 | 0.846964 | 1.446407 | 0.148063 | 0.212957 |
| 1693  | KIAA1328  | 138.4899569 | 1.224166441 | 0.167646 | 7.302089 | 2.83E-13 | 3.28E-12 |
| 5264  | SEMA6D    | 259.7853228 | 1.223883837 | 0.263524 | 4.644291 | 3.41E-06 | 1.27E-05 |

|       |           |             |             |          |          |          |          |
|-------|-----------|-------------|-------------|----------|----------|----------|----------|
| 2066  | MBP       | 1523.871626 | 1.223669913 | 0.1778   | 6.882285 | 5.89E-12 | 5.59E-11 |
| 10899 | CSNK1A1F  | 0.603754454 | 1.223081763 | 0.526806 | 2.321693 | 0.020249 | 0.036417 |
| 182   | TBC1D19   | 192.6957862 | 1.222526879 | 0.107433 | 11.37945 | 5.29E-30 | 5.70E-28 |
| 1916  | RGP1      | 175.8642531 | 1.222144418 | 0.172802 | 7.072498 | 1.52E-12 | 1.56E-11 |
| 5560  | MACC1     | 966.7851092 | 1.222090898 | 0.272025 | 4.49256  | 7.04E-06 | 2.48E-05 |
| 6887  | SLC4A5    | 265.7694385 | 1.221042062 | 0.315584 | 3.869152 | 0.000109 | 0.000311 |
| 3950  | ABHD3     | 431.6380865 | 1.220941453 | 0.227159 | 5.374831 | 7.67E-08 | 3.80E-07 |
| 1623  | PER3      | 761.5186227 | 1.220930923 | 0.165051 | 7.397296 | 1.39E-13 | 1.68E-12 |
| 8734  | ZNF208    | 127.2693701 | 1.220300624 | 0.391719 | 3.115247 | 0.001838 | 0.004125 |
| 3475  | SORL1     | 3430.766384 | 1.220291668 | 0.214422 | 5.691074 | 1.26E-08 | 7.12E-08 |
| 1791  | KBTBD7    | 144.9634213 | 1.220078436 | 0.169526 | 7.196982 | 6.16E-13 | 6.73E-12 |
| 15771 | NXNL1     | 0.264536679 | 1.219205405 | 1.555106 | 0.784002 | 0.433039 | 0.538203 |
| 2694  | FSD1L     | 90.78326203 | 1.217659007 | 0.193674 | 6.287143 | 3.23E-10 | 2.35E-09 |
| 5991  | TNFSF15   | 24.86665235 | 1.217566525 | 0.284901 | 4.273648 | 1.92E-05 | 6.29E-05 |
| 3239  | LOC220429 | 4.418524607 | 1.216422168 | 0.207536 | 5.861269 | 4.59E-09 | 2.78E-08 |
| 457   | CDC14B    | 640.0746682 | 1.216117224 | 0.124463 | 9.770932 | 1.50E-22 | 6.44E-21 |
| 13457 | PMP2      | 0.649435929 | 1.215196013 | 0.81013  | 1.500002 | 0.133614 | 0.194617 |
| 712   | NKIRAS1   | 186.874114  | 1.215035053 | 0.135282 | 8.981503 | 2.67E-19 | 7.35E-18 |
| 3651  | NORD116-1 | 51.77430962 | 1.214983795 | 0.218049 | 5.572057 | 2.52E-08 | 1.35E-07 |
| 8141  | CLDN2     | 3851.627179 | 1.214411567 | 0.361852 | 3.356101 | 0.00079  | 0.001903 |
| 356   | C4orf29   | 131.8113002 | 1.213833492 | 0.118513 | 10.24218 | 1.28E-24 | 7.06E-23 |
| 2948  | HIGD1A    | 1984.72014  | 1.212661055 | 0.199705 | 6.072254 | 1.26E-09 | 8.39E-09 |
| 4956  | FAM102A   | 1952.778929 | 1.211768963 | 0.252793 | 4.793515 | 1.64E-06 | 6.48E-06 |
| 1026  | MEM184C   | 713.3828377 | 1.21153152  | 0.146049 | 8.295405 | 1.08E-16 | 2.07E-15 |
| 7020  | KIAA1324I | 182.0554556 | 1.20998501  | 0.317149 | 3.815192 | 0.000136 | 0.00038  |
| 13617 | MS4A10    | 1.900643782 | 1.20994352  | 0.834417 | 1.450047 | 0.147045 | 0.211664 |
| 1422  | ATP10D    | 1198.092302 | 1.209854882 | 0.157592 | 7.677145 | 1.63E-14 | 2.24E-13 |
| 1161  | ABHD6     | 731.7304668 | 1.209498146 | 0.149831 | 8.072426 | 6.89E-16 | 1.16E-14 |
| 531   | CHIC1     | 578.2601774 | 1.208510186 | 0.126966 | 9.518341 | 1.76E-21 | 6.48E-20 |
| 951   | BDH2      | 1865.852798 | 1.207994184 | 0.14306  | 8.443985 | 3.07E-17 | 6.32E-16 |
| 4248  | SLC26A1   | 162.1553152 | 1.207748422 | 0.233053 | 5.182291 | 2.19E-07 | 1.01E-06 |
| 12811 | UMODL1    | 0.892122779 | 1.206476934 | 0.709063 | 1.701508 | 0.088848 | 0.135938 |
| 8741  | FUT3      | 37.01672753 | 1.20441891  | 0.387002 | 3.112177 | 0.001857 | 0.004164 |
| 9582  | ALDH1A2   | 350.7084246 | 1.203724548 | 0.43188  | 2.787171 | 0.005317 | 0.010877 |
| 4751  | STK32B    | 660.7368966 | 1.203569839 | 0.245216 | 4.908208 | 9.19E-07 | 3.79E-06 |
| 4596  | AK7       | 63.25754835 | 1.203481024 | 0.241213 | 4.989295 | 6.06E-07 | 2.58E-06 |
| 328   | APIAR     | 665.5054626 | 1.203035936 | 0.11539  | 10.42583 | 1.89E-25 | 1.13E-23 |
| 4673  | FAM184A   | 44.25787766 | 1.202657538 | 0.243025 | 4.948699 | 7.47E-07 | 3.13E-06 |
| 5082  | DC1001909 | 41.58047701 | 1.202236762 | 0.254098 | 4.731385 | 2.23E-06 | 8.60E-06 |
| 4166  | C9orf125  | 384.6226809 | 1.200230819 | 0.2291   | 5.238886 | 1.62E-07 | 7.60E-07 |
| 5587  | GALNTL2   | 507.5708021 | 1.198985249 | 0.267613 | 4.4803   | 7.45E-06 | 2.62E-05 |
| 5718  | NXNL2     | 40.87696766 | 1.198702607 | 0.271777 | 4.410617 | 1.03E-05 | 3.53E-05 |
| 14516 | NGB       | 0.377899094 | 1.198324339 | 1.031787 | 1.161406 | 0.245477 | 0.331484 |
| 1933  | SH3BGRL2  | 784.5749834 | 1.197979357 | 0.169878 | 7.052011 | 1.76E-12 | 1.79E-11 |
| 10592 | PRSS45    | 1.482153714 | 1.197537766 | 0.491015 | 2.438904 | 0.014732 | 0.027262 |
| 13505 | KFZP434L1 | 2.665625959 | 1.195694922 | 0.804123 | 1.486955 | 0.137027 | 0.198879 |
| 7029  | NR4A1     | 4548.200312 | 1.195366411 | 0.313848 | 3.808749 | 0.00014  | 0.000389 |

|       |           |             |             |          |          |          |          |
|-------|-----------|-------------|-------------|----------|----------|----------|----------|
| 7997  | SOX2OT    | 1.281588213 | 1.194758107 | 0.350317 | 3.410507 | 0.000648 | 0.001589 |
| 2049  | C15orf33  | 29.2092253  | 1.194539775 | 0.173028 | 6.903746 | 5.06E-12 | 4.85E-11 |
| 8913  | LOC285954 | 14.28774614 | 1.194310688 | 0.391984 | 3.046837 | 0.002313 | 0.005086 |
| 1564  | CPEB2     | 2197.633729 | 1.192558003 | 0.159549 | 7.474548 | 7.75E-14 | 9.71E-13 |
| 9451  | KRTAP5-1  | 4.876739174 | 1.191737866 | 0.419961 | 2.837737 | 0.004543 | 0.009423 |
| 11671 | FABP1     | 33.35006222 | 1.191716848 | 0.579217 | 2.057463 | 0.039642 | 0.066575 |
| 11142 | SPTBN2    | 634.0975307 | 1.191333333 | 0.531903 | 2.239758 | 0.025107 | 0.044168 |
| 900   | SCOC      | 1645.323812 | 1.191217353 | 0.139753 | 8.523711 | 1.55E-17 | 3.37E-16 |
| 1632  | ZNF132    | 89.70859412 | 1.190857852 | 0.161282 | 7.383701 | 1.54E-13 | 1.85E-12 |
| 7901  | PCDHGA11  | 74.65864848 | 1.189924751 | 0.345102 | 3.448038 | 0.000565 | 0.001401 |
| 6883  | NEK5      | 13.13578608 | 1.189483556 | 0.307327 | 3.870418 | 0.000109 | 0.000309 |
| 2283  | C9orf41   | 166.9430969 | 1.189273126 | 0.178322 | 6.669232 | 2.57E-11 | 2.21E-10 |
| 5796  | ABHD1     | 21.09163686 | 1.189127896 | 0.271745 | 4.3759   | 1.21E-05 | 4.09E-05 |
| 10120 | CHGB      | 71.43093744 | 1.188515674 | 0.455482 | 2.609361 | 0.009071 | 0.01757  |
| 9695  | EDN2      | 204.6490375 | 1.187557237 | 0.432103 | 2.748322 | 0.00599  | 0.012111 |
| 1387  | ARL6      | 148.0937055 | 1.187061548 | 0.153584 | 7.729076 | 1.08E-14 | 1.53E-13 |
| 2894  | TIMP3     | 14580.48144 | 1.186513568 | 0.194045 | 6.114621 | 9.68E-10 | 6.56E-09 |
| 942   | DLAT      | 1276.434693 | 1.186256235 | 0.140227 | 8.459543 | 2.68E-17 | 5.59E-16 |
| 10068 | PCDH10    | 631.8174135 | 1.185642624 | 0.450868 | 2.629688 | 0.008546 | 0.016639 |
| 13921 | LOC157627 | 0.401254744 | 1.18558749  | 0.882417 | 1.343568 | 0.179088 | 0.252159 |
| 277   | EFHA1     | 985.1170108 | 1.185310427 | 0.110754 | 10.70217 | 9.94E-27 | 7.04E-25 |
| 6451  | SAMD12    | 268.8919278 | 1.184970519 | 0.292734 | 4.047937 | 5.17E-05 | 0.000157 |
| 1594  | RBM47     | 3246.855795 | 1.184899254 | 0.15951  | 7.428393 | 1.10E-13 | 1.35E-12 |
| 2208  | BEX4      | 945.7071085 | 1.184736623 | 0.175592 | 6.747115 | 1.51E-11 | 1.34E-10 |
| 7947  | UPB1      | 491.1170816 | 1.184594092 | 0.345448 | 3.42915  | 0.000605 | 0.001493 |
| 9235  | LOC284578 | 11.49190585 | 1.183326163 | 0.404453 | 2.925743 | 0.003436 | 0.007294 |
| 1751  | HABP4     | 722.4955562 | 1.181077269 | 0.163087 | 7.241999 | 4.42E-13 | 4.95E-12 |
| 5527  | OC1001305 | 14.29400398 | 1.180265007 | 0.261887 | 4.506773 | 6.58E-06 | 2.33E-05 |
| 5339  | VDR       | 583.5267482 | 1.179746789 | 0.256346 | 4.602158 | 4.18E-06 | 1.54E-05 |
| 1206  | TRPM7     | 1260.224963 | 1.179452866 | 0.147306 | 8.006848 | 1.18E-15 | 1.91E-14 |
| 2562  | SH3BP4    | 1856.756045 | 1.178985524 | 0.18379  | 6.414838 | 1.41E-10 | 1.08E-09 |
| 6478  | ANGPT1    | 443.915227  | 1.178887534 | 0.292013 | 4.037102 | 5.41E-05 | 0.000164 |
| 13139 | OR2T2     | 0.372546046 | 1.178860063 | 0.738249 | 1.596833 | 0.110303 | 0.16454  |
| 12433 | GC        | 47.50414436 | 1.17884228  | 0.645424 | 1.826463 | 0.067781 | 0.106858 |
| 6344  | C14orf37  | 104.4057562 | 1.178047917 | 0.28687  | 4.106552 | 4.02E-05 | 0.000124 |
| 407   | DYNLL2    | 1335.571227 | 1.177867462 | 0.11763  | 10.01331 | 1.33E-23 | 6.40E-22 |
| 13242 | DLK1      | 1.514005917 | 1.177858554 | 0.752362 | 1.565547 | 0.117455 | 0.173858 |
| 5535  | AKR1C1    | 867.651966  | 1.177594427 | 0.261463 | 4.503859 | 6.67E-06 | 2.36E-05 |
| 795   | ATP5S     | 118.5430808 | 1.176105401 | 0.134253 | 8.760353 | 1.95E-18 | 4.80E-17 |
| 637   | HSPC159   | 707.9694972 | 1.17497968  | 0.127737 | 9.198424 | 3.63E-20 | 1.12E-18 |
| 313   | KLHDC2    | 1408.85665  | 1.174529643 | 0.112205 | 10.46774 | 1.22E-25 | 7.61E-24 |
| 3908  | C9orf45   | 89.92272081 | 1.174423122 | 0.217589 | 5.397433 | 6.76E-08 | 3.39E-07 |
| 4896  | FAM174B   | 434.8668597 | 1.174228351 | 0.243175 | 4.828738 | 1.37E-06 | 5.50E-06 |
| 16270 | LOC348021 | 0.306191697 | 1.174068843 | 1.849933 | 0.634655 | 0.525654 | 0.633304 |
| 2732  | IQCH      | 44.10983553 | 1.17400668  | 0.187698 | 6.254772 | 3.98E-10 | 2.86E-09 |
| 3936  | RAPGEF4   | 396.9796346 | 1.173708702 | 0.218105 | 5.381387 | 7.39E-08 | 3.68E-07 |
| 5595  | APOLD1    | 4559.062418 | 1.173685561 | 0.262313 | 4.474374 | 7.66E-06 | 2.68E-05 |

|       |          |             |             |          |          |          |          |
|-------|----------|-------------|-------------|----------|----------|----------|----------|
| 1019  | BAG1     | 1240.723596 | 1.173668535 | 0.14136  | 8.302688 | 1.02E-16 | 1.96E-15 |
| 12054 | SPOCK3   | 0.938034888 | 1.173067344 | 0.603848 | 1.942652 | 0.052058 | 0.084652 |
| 1112  | GPRASP2  | 381.1660167 | 1.172904661 | 0.144057 | 8.141974 | 3.89E-16 | 6.85E-15 |
| 521   | RAPGEF2  | 1547.059645 | 1.172334424 | 0.122907 | 9.53835  | 1.45E-21 | 5.46E-20 |
| 813   | BHLHB9   | 137.0928115 | 1.172300049 | 0.134366 | 8.724692 | 2.67E-18 | 6.43E-17 |
| 5865  | CMYA5    | 424.762526  | 1.17110925  | 0.269944 | 4.338338 | 1.44E-05 | 4.80E-05 |
| 2924  | ZNF833   | 27.27307026 | 1.171073836 | 0.192193 | 6.093208 | 1.11E-09 | 7.42E-09 |
| 15388 | FAM74A1  | 0.442046719 | 1.170971865 | 1.310907 | 0.893254 | 0.371721 | 0.473493 |
| 5378  | GPR89B   | 29.30768109 | 1.170178383 | 0.255641 | 4.577425 | 4.71E-06 | 1.72E-05 |
| 10164 | C12orf39 | 126.5875175 | 1.169809259 | 0.450911 | 2.594325 | 0.009478 | 0.018277 |
| 6819  | SULT1C2  | 1094.283431 | 1.169633764 | 0.300526 | 3.891954 | 9.94E-05 | 0.000286 |
| 9374  | C18orf16 | 4.249606745 | 1.169156165 | 0.407254 | 2.870827 | 0.004094 | 0.008561 |
| 495   | FBXL5    | 6193.795372 | 1.168951857 | 0.121253 | 9.640598 | 5.39E-22 | 2.13E-20 |
| 13277 | LMAN1L   | 0.413165984 | 1.167453773 | 0.752397 | 1.551647 | 0.120747 | 0.17826  |
| 7382  | IGSF9B   | 24.58927581 | 1.167367876 | 0.318692 | 3.663    | 0.000249 | 0.000662 |
| 3102  | ADHFE1   | 134.8713368 | 1.166942375 | 0.195713 | 5.962527 | 2.48E-09 | 1.57E-08 |
| 5454  | ID4      | 680.0622584 | 1.166451023 | 0.256909 | 4.540332 | 5.62E-06 | 2.02E-05 |
| 7107  | ANO9     | 234.6931257 | 1.166205959 | 0.308386 | 3.781645 | 0.000156 | 0.00043  |
| 13046 | C9orf135 | 0.847485201 | 1.165073749 | 0.714106 | 1.631514 | 0.102782 | 0.154425 |
| 3682  | ZSWIM5   | 319.0216944 | 1.163431864 | 0.209674 | 5.548773 | 2.88E-08 | 1.53E-07 |
| 2103  | MPL      | 19.2796068  | 1.162947682 | 0.169852 | 6.84682  | 7.55E-12 | 7.04E-11 |
| 3290  | SEPHS2   | 3830.451143 | 1.161920042 | 0.199578 | 5.821874 | 5.82E-09 | 3.47E-08 |
| 2314  | CTDSP1   | 1544.575221 | 1.161857226 | 0.174903 | 6.642883 | 3.08E-11 | 2.61E-10 |
| 8492  | NTRK2    | 641.2855123 | 1.161784195 | 0.361888 | 3.210346 | 0.001326 | 0.00306  |
| 9881  | TRIM74   | 5.680736179 | 1.161681868 | 0.431138 | 2.694457 | 0.00705  | 0.013986 |
| 16515 | EIF4E1B  | 0.234297879 | 1.161194128 | 2.044848 | 0.567863 | 0.570128 | 0.676662 |
| 16746 | ASZ1     | 0.218657265 | 1.161191409 | 2.296912 | 0.505545 | 0.613176 | 0.717716 |
| 13936 | EDDM3A   | 0.330948516 | 1.160215441 | 0.865948 | 1.339821 | 0.180304 | 0.253597 |
| 9601  | CDC20B   | 6.784033399 | 1.159968802 | 0.417312 | 2.779622 | 0.005442 | 0.011111 |
| 4417  | SYN3     | 8.419979881 | 1.159199003 | 0.227654 | 5.091925 | 3.54E-07 | 1.57E-06 |
| 6644  | TNN      | 22.2568608  | 1.157505316 | 0.291871 | 3.965814 | 7.31E-05 | 0.000216 |
| 507   | CUL5     | 1166.139162 | 1.156132425 | 0.120672 | 9.580804 | 9.63E-22 | 3.72E-20 |
| 2267  | ZNF493   | 258.3936263 | 1.155900884 | 0.172965 | 6.68286  | 2.34E-11 | 2.03E-10 |
| 2942  | UBL3     | 2026.59747  | 1.155855843 | 0.190235 | 6.07593  | 1.23E-09 | 8.21E-09 |
| 12092 | GJB7     | 0.664143666 | 1.155531779 | 0.598406 | 1.931017 | 0.053481 | 0.086692 |
| 1814  | SLC35A3  | 397.7306841 | 1.153922418 | 0.160828 | 7.174877 | 7.24E-13 | 7.82E-12 |
| 1836  | ZFP28    | 111.6277916 | 1.153732513 | 0.161074 | 7.162727 | 7.91E-13 | 8.44E-12 |
| 2347  | PNPLA8   | 1235.783821 | 1.15308911  | 0.17443  | 6.610608 | 3.83E-11 | 3.20E-10 |
| 644   | ABCD3    | 1671.204174 | 1.152805343 | 0.125689 | 9.171889 | 4.65E-20 | 1.41E-18 |
| 2682  | EPS8     | 3947.547334 | 1.152342203 | 0.183016 | 6.296394 | 3.05E-10 | 2.23E-09 |
| 9270  | NETO1    | 9.1720988   | 1.151617583 | 0.395862 | 2.90914  | 0.003624 | 0.007663 |
| 6369  | CLEC3B   | 831.062412  | 1.151196185 | 0.281201 | 4.093851 | 4.24E-05 | 0.000131 |
| 7694  | AKR7A3   | 396.4214036 | 1.151185869 | 0.325011 | 3.541991 | 0.000397 | 0.001012 |
| 6248  | RGS5     | 41721.6105  | 1.150921552 | 0.276992 | 4.15507  | 3.25E-05 | 0.000102 |
| 6390  | CGNL1    | 2628.211135 | 1.149961937 | 0.281893 | 4.07942  | 4.51E-05 | 0.000138 |
| 4119  | TMEM116  | 366.2557024 | 1.149935132 | 0.218146 | 5.27141  | 1.35E-07 | 6.44E-07 |
| 10641 | UCN3     | 2.274687386 | 1.149834121 | 0.475536 | 2.417973 | 0.015607 | 0.028749 |



|       |           |             |             |          |          |          |          |
|-------|-----------|-------------|-------------|----------|----------|----------|----------|
| 1729  | CCDC85C   | 582.3262428 | 1.149733481 | 0.158183 | 7.268356 | 3.64E-13 | 4.13E-12 |
| 9936  | KCNJ1     | 51.09037898 | 1.147998349 | 0.42913  | 2.675174 | 0.007469 | 0.014734 |
| 1039  | IVNS1ABF  | 8643.690114 | 1.146087237 | 0.138788 | 8.25783  | 1.48E-16 | 2.80E-15 |
| 5403  | SETMAR    | 290.997973  | 1.144947354 | 0.250878 | 4.563766 | 5.02E-06 | 1.82E-05 |
| 535   | DZIP3     | 765.0295996 | 1.144807415 | 0.120388 | 9.509294 | 1.92E-21 | 7.03E-20 |
| 3111  | GPRASP1   | 293.6485754 | 1.144624534 | 0.19225  | 5.953843 | 2.62E-09 | 1.65E-08 |
| 5534  | SLCO2A1   | 2416.413837 | 1.144433744 | 0.254065 | 4.504491 | 6.65E-06 | 2.36E-05 |
| 12142 | GABRB1    | 1.133039224 | 1.144180409 | 0.597765 | 1.914098 | 0.055608 | 0.089768 |
| 13876 | GRID2     | 1.061460294 | 1.143430205 | 0.842123 | 1.357795 | 0.174529 | 0.246536 |
| 1171  | RAB11FIP2 | 730.3127583 | 1.142360554 | 0.141705 | 8.06156  | 7.53E-16 | 1.26E-14 |
| 8781  | GLYAT     | 1125.831245 | 1.141450437 | 0.369108 | 3.092456 | 0.001985 | 0.004431 |
| 7026  | LRIT3     | 11.68397396 | 1.141367438 | 0.299437 | 3.811711 | 0.000138 | 0.000385 |
| 1192  | AFG3L2    | 2130.600712 | 1.141121526 | 0.142174 | 8.026223 | 1.01E-15 | 1.65E-14 |
| 10009 | SHISA6    | 3.760494146 | 1.140212942 | 0.430267 | 2.65001  | 0.008049 | 0.015763 |
| 9163  | ENTPD8    | 19.57063819 | 1.140001719 | 0.385943 | 2.953806 | 0.003139 | 0.006714 |
| 12277 | SLC26A5   | 0.8050864   | 1.139186983 | 0.608372 | 1.872518 | 0.061135 | 0.097606 |
| 3190  | PLEKHA6   | 1325.183692 | 1.138607187 | 0.193369 | 5.88826  | 3.90E-09 | 2.40E-08 |
| 1954  | USP53     | 781.8303505 | 1.137698108 | 0.161755 | 7.033472 | 2.01E-12 | 2.02E-11 |
| 9459  | FAM155B   | 95.42192249 | 1.137269391 | 0.401251 | 2.834311 | 0.004592 | 0.009517 |
| 9816  | SLC22A2   | 4203.46799  | 1.137092764 | 0.419218 | 2.712415 | 0.006679 | 0.013338 |
| 4882  | C10orf140 | 32.86684809 | 1.136690221 | 0.234888 | 4.839284 | 1.30E-06 | 5.23E-06 |
| 1648  | PTPLAD1   | 2401.236323 | 1.136262703 | 0.154313 | 7.363372 | 1.79E-13 | 2.13E-12 |
| 412   | DBT       | 754.0511235 | 1.134988953 | 0.113551 | 9.995432 | 1.60E-23 | 7.59E-22 |
| 5901  | AFF3      | 334.9608855 | 1.134773455 | 0.262635 | 4.320731 | 1.56E-05 | 5.17E-05 |
| 7667  | DCDC2     | 563.1436375 | 1.134608491 | 0.319456 | 3.551685 | 0.000383 | 0.000979 |
| 3942  | ACOT4     | 190.8589387 | 1.134571629 | 0.210933 | 5.378824 | 7.50E-08 | 3.73E-07 |
| 4910  | TNFRSF19  | 652.9557272 | 1.134009286 | 0.235192 | 4.821627 | 1.42E-06 | 5.68E-06 |
| 7582  | LAMA1     | 705.1648048 | 1.133788465 | 0.316238 | 3.585237 | 0.000337 | 0.000871 |
| 3721  | CASZ1     | 181.9852176 | 1.133755234 | 0.205237 | 5.524136 | 3.31E-08 | 1.74E-07 |
| 11752 | CLRN1OS   | 0.623363226 | 1.133516804 | 0.556623 | 2.036416 | 0.041709 | 0.069557 |
| 2603  | FITM2     | 95.35899862 | 1.133427502 | 0.17766  | 6.379754 | 1.77E-10 | 1.34E-09 |
| 2920  | LIPE      | 86.21098323 | 1.133298111 | 0.185906 | 6.096086 | 1.09E-09 | 7.30E-09 |
| 645   | BCL2L2    | 1133.446013 | 1.133090049 | 0.12354  | 9.171838 | 4.65E-20 | 1.41E-18 |
| 2683  | MANEA     | 947.0146172 | 1.132737935 | 0.179919 | 6.295825 | 3.06E-10 | 2.23E-09 |
| 4062  | EVC       | 1532.374268 | 1.132620024 | 0.213682 | 5.300491 | 1.15E-07 | 5.57E-07 |
| 1139  | BPGM      | 868.9913801 | 1.132603003 | 0.139709 | 8.106865 | 5.19E-16 | 8.94E-15 |
| 1143  | DNAJB14   | 476.8805187 | 1.130740433 | 0.139574 | 8.101396 | 5.43E-16 | 9.32E-15 |
| 9211  | KCNIP3    | 518.7734437 | 1.13070446  | 0.385312 | 2.934513 | 0.003341 | 0.007109 |
| 5777  | ASAH2B    | 10.85707292 | 1.13048415  | 0.257955 | 4.382483 | 1.17E-05 | 3.98E-05 |
| 1950  | SUCLG1    | 2287.118648 | 1.129698878 | 0.160561 | 7.035958 | 1.98E-12 | 1.99E-11 |
| 6186  | ALPK3     | 1457.963083 | 1.129555272 | 0.270083 | 4.182257 | 2.89E-05 | 9.15E-05 |
| 3345  | SOCS2     | 459.9931742 | 1.128875429 | 0.195063 | 5.787241 | 7.16E-09 | 4.19E-08 |
| 510   | AK3       | 1863.863426 | 1.128569706 | 0.118008 | 9.563484 | 1.14E-21 | 4.38E-20 |
| 2031  | C14orf174 | 38.20478138 | 1.127749407 | 0.162827 | 6.926059 | 4.33E-12 | 4.18E-11 |
| 485   | STX3      | 1480.107    | 1.127609584 | 0.116598 | 9.670913 | 4.01E-22 | 1.62E-20 |
| 10077 | DAO       | 116.6559166 | 1.126817278 | 0.429146 | 2.625721 | 0.008647 | 0.016818 |
| 8601  | SCUBE1    | 54.76217574 | 1.124882727 | 0.354324 | 3.174727 | 0.0015   | 0.003418 |

|       |           |             |             |          |          |          |          |
|-------|-----------|-------------|-------------|----------|----------|----------|----------|
| 482   | CTAGE5    | 1685.339235 | 1.124778497 | 0.116104 | 9.687719 | 3.40E-22 | 1.38E-20 |
| 98    | ALG2      | 1045.119162 | 1.124437689 | 0.090875 | 12.37344 | 3.64E-35 | 7.28E-33 |
| 4310  | RASGRF2   | 306.9579191 | 1.124019193 | 0.218206 | 5.151184 | 2.59E-07 | 1.18E-06 |
| 630   | KTN1      | 4261.868496 | 1.123882913 | 0.122025 | 9.210239 | 3.25E-20 | 1.01E-18 |
| 7779  | C1orf175  | 100.0859407 | 1.123587871 | 0.320329 | 3.50761  | 0.000452 | 0.001139 |
| 326   | MRPL50    | 471.0306164 | 1.121401012 | 0.107526 | 10.42915 | 1.83E-25 | 1.10E-23 |
| 7993  | FAM9C     | 3.051038363 | 1.121351664 | 0.328633 | 3.412166 | 0.000644 | 0.00158  |
| 314   | MFSD8     | 477.8382299 | 1.12112739  | 0.107144 | 10.46375 | 1.27E-25 | 7.91E-24 |
| 7991  | SLC7A8    | 1100.766199 | 1.120526609 | 0.328353 | 3.412563 | 0.000644 | 0.001579 |
| 8891  | AMN       | 853.5015832 | 1.120407477 | 0.366664 | 3.055678 | 0.002246 | 0.00495  |
| 680   | FBXO34    | 612.7838388 | 1.11989876  | 0.123601 | 9.06061  | 1.30E-19 | 3.74E-18 |
| 9003  | GABRB2    | 20.49236711 | 1.118724177 | 0.371515 | 3.01125  | 0.002602 | 0.005664 |
| 7080  | DPP4      | 4422.849179 | 1.118266195 | 0.294937 | 3.791541 | 0.00015  | 0.000414 |
| 1825  | AGL       | 951.6965347 | 1.11818305  | 0.156034 | 7.166281 | 7.71E-13 | 8.28E-12 |
| 10119 | HCN2      | 20.83710238 | 1.11769886  | 0.428334 | 2.609407 | 0.00907  | 0.017569 |
| 4226  | TMEM233   | 56.36469046 | 1.117254517 | 0.215034 | 5.195705 | 2.04E-07 | 9.46E-07 |
| 338   | AFTPH     | 1756.528427 | 1.117001978 | 0.107702 | 10.37124 | 3.35E-25 | 1.94E-23 |
| 1150  | KBTBD3    | 161.9740866 | 1.116912943 | 0.138099 | 8.087787 | 6.08E-16 | 1.04E-14 |
| 10106 | GSTA1     | 6314.68621  | 1.116850102 | 0.427145 | 2.614689 | 0.008931 | 0.017321 |
| 8992  | PCDHGB4   | 89.83480485 | 1.116845949 | 0.370422 | 3.015061 | 0.002569 | 0.005601 |
| 6777  | C10orf110 | 10.35786007 | 1.115444    | 0.285404 | 3.908295 | 9.29E-05 | 0.000269 |
| 1680  | MOSC2     | 652.4695518 | 1.114548712 | 0.152263 | 7.319877 | 2.48E-13 | 2.90E-12 |
| 2297  | TMEM220   | 281.1277667 | 1.114261792 | 0.167341 | 6.658647 | 2.76E-11 | 2.36E-10 |
| 3762  | FLJ36777  | 11.15957763 | 1.110847324 | 0.20199  | 5.499526 | 3.81E-08 | 1.98E-07 |
| 6953  | ZDHHC15   | 59.44876306 | 1.109325095 | 0.288518 | 3.844908 | 0.000121 | 0.00034  |
| 10738 | SPINK5    | 89.66942474 | 1.109305992 | 0.465239 | 2.38438  | 0.017108 | 0.031229 |
| 2241  | ATE1      | 254.550114  | 1.10897463  | 0.16533  | 6.707653 | 1.98E-11 | 1.73E-10 |
| 4470  | TGALNAc   | 180.6111883 | 1.108075969 | 0.219125 | 5.056812 | 4.26E-07 | 1.87E-06 |
| 2046  | UQCRFS1   | 1856.460488 | 1.107997816 | 0.160278 | 6.912977 | 4.75E-12 | 4.55E-11 |
| 4994  | ASAH2     | 4.838116162 | 1.106599772 | 0.23169  | 4.776204 | 1.79E-06 | 7.01E-06 |
| 1622  | GOLGA4    | 1940.08884  | 1.106490743 | 0.149527 | 7.399948 | 1.36E-13 | 1.65E-12 |
| 3646  | NCALD     | 884.7646518 | 1.106233752 | 0.198443 | 5.574576 | 2.48E-08 | 1.33E-07 |
| 9515  | TRPV6     | 4.895568317 | 1.106198    | 0.393131 | 2.813819 | 0.004896 | 0.010085 |
| 3625  | ACOT1     | 683.2140962 | 1.104628949 | 0.197591 | 5.59048  | 2.26E-08 | 1.22E-07 |
| 6960  | BEX2      | 388.3256916 | 1.10452491  | 0.287478 | 3.842114 | 0.000122 | 0.000343 |
| 4445  | C3orf18   | 209.1705491 | 1.103677943 | 0.217434 | 5.075913 | 3.86E-07 | 1.70E-06 |
| 16204 | UCP1      | 0.227176918 | 1.103489614 | 1.688154 | 0.653666 | 0.513327 | 0.62094  |
| 4254  | SOCS7     | 66.80412013 | 1.103184079 | 0.212962 | 5.180202 | 2.22E-07 | 1.02E-06 |
| 3480  | CLIC4     | 13505.91774 | 1.102892973 | 0.193926 | 5.687184 | 1.29E-08 | 7.27E-08 |
| 1418  | SCAPER    | 365.0745248 | 1.102595361 | 0.143588 | 7.678889 | 1.60E-14 | 2.22E-13 |
| 3189  | PDP1      | 801.3199578 | 1.102466403 | 0.187231 | 5.888259 | 3.90E-09 | 2.40E-08 |
| 4970  | MYO10     | 1958.35663  | 1.10235989  | 0.230196 | 4.788784 | 1.68E-06 | 6.62E-06 |
| 7399  | LOC158696 | 6.084720449 | 1.101207935 | 0.3011   | 3.657282 | 0.000255 | 0.000675 |
| 9553  | COL9A1    | 4.594124696 | 1.101136829 | 0.393265 | 2.799986 | 0.00511  | 0.010486 |
| 4612  | KCTD1     | 322.4388763 | 1.09973999  | 0.220678 | 4.983454 | 6.25E-07 | 2.65E-06 |
| 5328  | SALL2     | 269.531159  | 1.099628383 | 0.238587 | 4.608929 | 4.05E-06 | 1.49E-05 |
| 5467  | DNAJC6    | 215.5256885 | 1.098799821 | 0.242272 | 4.535404 | 5.75E-06 | 2.06E-05 |

|       |           |             |             |          |          |          |          |
|-------|-----------|-------------|-------------|----------|----------|----------|----------|
| 1384  | OTUD1     | 751.532253  | 1.098055023 | 0.141874 | 7.739666 | 9.97E-15 | 1.41E-13 |
| 11887 | SLC22A7   | 57.08090002 | 1.09687353  | 0.550547 | 1.992333 | 0.046335 | 0.076403 |
| 7120  | ANKRD9    | 105.9937415 | 1.095002541 | 0.289851 | 3.777806 | 0.000158 | 0.000436 |
| 2838  | FBXL2     | 195.7759643 | 1.095001594 | 0.177949 | 6.153451 | 7.58E-10 | 5.24E-09 |
| 6367  | SNTB1     | 1751.459175 | 1.094395523 | 0.267246 | 4.095093 | 4.22E-05 | 0.00013  |
| 6425  | SSTR2     | 206.3230873 | 1.09408531  | 0.269258 | 4.063341 | 4.84E-05 | 0.000148 |
| 3994  | MARK1     | 134.1070306 | 1.0931817   | 0.204551 | 5.344304 | 9.08E-08 | 4.45E-07 |
| 9513  | TMC4      | 411.151892  | 1.093129675 | 0.388362 | 2.814719 | 0.004882 | 0.010059 |
| 1151  | KIAA1109  | 1876.330393 | 1.092962851 | 0.135163 | 8.086247 | 6.15E-16 | 1.05E-14 |
| 7902  | KCNH1     | 9.606650734 | 1.092677473 | 0.316962 | 3.447349 | 0.000566 | 0.001404 |
| 1236  | CYP4V2    | 1637.597786 | 1.092556474 | 0.137471 | 7.947556 | 1.90E-15 | 3.01E-14 |
| 9639  | STK33     | 105.9941573 | 1.091563068 | 0.394589 | 2.766327 | 0.005669 | 0.011528 |
| 11416 | SLC38A3   | 13.30713273 | 1.091375325 | 0.509165 | 2.143461 | 0.032076 | 0.055074 |
| 1782  | SGPP1     | 930.6219986 | 1.091170622 | 0.151453 | 7.204664 | 5.82E-13 | 6.40E-12 |
| 4771  | ZSCAN12P  | 26.65137653 | 1.090597928 | 0.222693 | 4.897312 | 9.72E-07 | 3.99E-06 |
| 8548  | GRIP2     | 14.47891835 | 1.089279937 | 0.341379 | 3.190823 | 0.001419 | 0.003253 |
| 6728  | PHKA1     | 625.2328419 | 1.089188512 | 0.277119 | 3.930407 | 8.48E-05 | 0.000247 |
| 7920  | AR        | 140.1430968 | 1.0888767   | 0.31648  | 3.440585 | 0.00058  | 0.001437 |
| 5557  | UHMK1     | 567.3335972 | 1.088521301 | 0.242252 | 4.49335  | 7.01E-06 | 2.47E-05 |
| 9035  | ESRRB     | 7.389767842 | 1.087409831 | 0.362439 | 3.000257 | 0.002698 | 0.005852 |
| 9546  | CCL16     | 3.878288212 | 1.087196475 | 0.387971 | 2.802264 | 0.005075 | 0.01042  |
| 3707  | C9orf102  | 134.0476817 | 1.086548364 | 0.196374 | 5.533051 | 3.15E-08 | 1.66E-07 |
| 5581  | MAP3K9    | 47.08365016 | 1.086282483 | 0.242379 | 4.48176  | 7.40E-06 | 2.60E-05 |
| 3072  | ACSS1     | 1800.380198 | 1.086144547 | 0.181592 | 5.98124  | 2.21E-09 | 1.41E-08 |
| 3219  | SPTLC3    | 744.3646259 | 1.085485794 | 0.184789 | 5.874196 | 4.25E-09 | 2.59E-08 |
| 2743  | KLHDC1    | 73.50513577 | 1.08521582  | 0.173862 | 6.241824 | 4.32E-10 | 3.09E-09 |
| 1870  | SETDB2    | 431.0371023 | 1.084605255 | 0.152334 | 7.119939 | 1.08E-12 | 1.13E-11 |
| 3530  | NCOA7     | 1863.050189 | 1.08433167  | 0.191932 | 5.64956  | 1.61E-08 | 8.93E-08 |
| 10481 | IL12B     | 6.088362311 | 1.08426226  | 0.437413 | 2.478807 | 0.013182 | 0.024653 |
| 4702  | DUSP8     | 224.7387146 | 1.08335983  | 0.219779 | 4.929322 | 8.25E-07 | 3.44E-06 |
| 9589  | C1orf114  | 17.24441836 | 1.082119986 | 0.388806 | 2.783186 | 0.005383 | 0.011003 |
| 8967  | ADAMTS10  | 68.14182257 | 1.081918199 | 0.357759 | 3.024154 | 0.002493 | 0.00545  |
| 1727  | DLD       | 2537.608148 | 1.081899882 | 0.148824 | 7.269662 | 3.60E-13 | 4.09E-12 |
| 8339  | LOC134466 | 37.02854538 | 1.081759505 | 0.330056 | 3.277505 | 0.001047 | 0.002462 |
| 9447  | CEND1     | 12.89618931 | 1.081311743 | 0.380769 | 2.83981  | 0.004514 | 0.009366 |
| 2129  | TMEM33    | 1955.277103 | 1.081237404 | 0.158448 | 6.823922 | 8.86E-12 | 8.16E-11 |
| 3006  | FAM164C   | 123.7450427 | 1.081076759 | 0.179294 | 6.029638 | 1.64E-09 | 1.07E-08 |
| 14996 | ADAMTS19  | 0.769000219 | 1.080925626 | 1.072463 | 1.00789  | 0.313507 | 0.409779 |
| 4603  | TSPAN12   | 3032.177871 | 1.080861622 | 0.21669  | 4.988045 | 6.10E-07 | 2.60E-06 |
| 10878 | ANGPTL3   | 133.3916764 | 1.080070922 | 0.463578 | 2.329859 | 0.019814 | 0.035702 |
| 1659  | ZNF737    | 379.727028  | 1.079855987 | 0.147006 | 7.345635 | 2.05E-13 | 2.42E-12 |
| 8159  | ZNF750    | 5.793393452 | 1.079843927 | 0.322514 | 3.348211 | 0.000813 | 0.001954 |
| 3934  | CYCS      | 4043.587969 | 1.079766716 | 0.200621 | 5.382121 | 7.36E-08 | 3.67E-07 |
| 5474  | RALGAPA   | 534.8696723 | 1.079362651 | 0.23811  | 4.533046 | 5.81E-06 | 2.08E-05 |
| 2742  | PTPN13    | 998.4692054 | 1.079248802 | 0.17287  | 6.243127 | 4.29E-10 | 3.07E-09 |
| 8410  | NWD1      | 20.02978664 | 1.079089392 | 0.332467 | 3.245708 | 0.001172 | 0.002731 |
| 463   | ZFP112    | 114.0473703 | 1.07862078  | 0.11053  | 9.758609 | 1.69E-22 | 7.17E-21 |

|       |           |             |             |          |          |          |          |
|-------|-----------|-------------|-------------|----------|----------|----------|----------|
| 4918  | CDYL2     | 112.1944628 | 1.078517582 | 0.223849 | 4.818069 | 1.45E-06 | 5.78E-06 |
| 3531  | RAI2      | 500.3495907 | 1.077957566 | 0.19083  | 5.648776 | 1.62E-08 | 8.97E-08 |
| 1472  | C10orf32  | 893.4104875 | 1.077867452 | 0.141718 | 7.605734 | 2.83E-14 | 3.77E-13 |
| 1809  | ACO2      | 5870.850892 | 1.077801264 | 0.150105 | 7.180306 | 6.96E-13 | 7.54E-12 |
| 13300 | XIST      | 4697.634654 | 1.07726956  | 0.698155 | 1.543023 | 0.122825 | 0.181028 |
| 1185  | C14orf167 | 618.1658552 | 1.077254944 | 0.133908 | 8.044715 | 8.64E-16 | 1.43E-14 |
| 4148  | RHOBTB2   | 790.6960386 | 1.077090309 | 0.205077 | 5.252134 | 1.50E-07 | 7.10E-07 |
| 651   | ZC3H12C   | 447.8518633 | 1.076337864 | 0.1174   | 9.168139 | 4.81E-20 | 1.45E-18 |
| 7170  | SLC38A11  | 49.67835963 | 1.076154609 | 0.286521 | 3.75594  | 0.000173 | 0.000472 |
| 11629 | BNC1      | 42.01174484 | 1.075792359 | 0.520196 | 2.068051 | 0.038635 | 0.06511  |
| 6399  | GLS2      | 37.87563393 | 1.075609748 | 0.263859 | 4.076454 | 4.57E-05 | 0.00014  |
| 5451  | MECOM     | 863.3821335 | 1.075483774 | 0.236785 | 4.542028 | 5.57E-06 | 2.00E-05 |
| 5212  | ADRB2     | 62.57437779 | 1.075354811 | 0.230096 | 4.673509 | 2.96E-06 | 1.11E-05 |
| 1115  | FASTKD1   | 369.5100061 | 1.074742697 | 0.132048 | 8.139028 | 3.98E-16 | 7.00E-15 |
| 674   | KIAA0232  | 1605.420526 | 1.074465547 | 0.118246 | 9.086672 | 1.02E-19 | 2.97E-18 |
| 5049  | C22orf25  | 1047.469238 | 1.07432354  | 0.226346 | 4.746375 | 2.07E-06 | 8.04E-06 |
| 1204  | GMFB      | 1494.65466  | 1.074152198 | 0.134112 | 8.00939  | 1.15E-15 | 1.88E-14 |
| 3792  | LLGL2     | 751.9772887 | 1.073827642 | 0.196007 | 5.478523 | 4.29E-08 | 2.22E-07 |
| 1705  | ERO1LB    | 701.7353756 | 1.073088885 | 0.147207 | 7.289679 | 3.11E-13 | 3.57E-12 |
| 1462  | FNBP1L    | 2308.614584 | 1.072875694 | 0.140729 | 7.623722 | 2.46E-14 | 3.30E-13 |
| 2461  | C14orf135 | 1096.163502 | 1.072627256 | 0.164852 | 6.506601 | 7.69E-11 | 6.12E-10 |
| 8628  | LOC162632 | 274.2121522 | 1.072051513 | 0.339071 | 3.161735 | 0.001568 | 0.003563 |
| 3751  | SGMS2     | 1325.752908 | 1.07196496  | 0.194677 | 5.506369 | 3.66E-08 | 1.91E-07 |
| 4518  | NBEA      | 507.5255032 | 1.071640718 | 0.213237 | 5.02559  | 5.02E-07 | 2.18E-06 |
| 4893  | CD274     | 59.3392749  | 1.070895174 | 0.221694 | 4.830512 | 1.36E-06 | 5.46E-06 |
| 1034  | ANKRD46   | 625.9830551 | 1.070712595 | 0.12933  | 8.2789   | 1.24E-16 | 2.36E-15 |
| 2727  | AKAP9     | 1832.062695 | 1.07066644  | 0.171093 | 6.257816 | 3.90E-10 | 2.81E-09 |
| 765   | LRBA      | 1613.014556 | 1.070169594 | 0.120994 | 8.84482  | 9.17E-19 | 2.35E-17 |
| 9819  | HMP19     | 2.097252225 | 1.069947553 | 0.394706 | 2.710749 | 0.006713 | 0.013398 |
| 3849  | ZNF542    | 284.0142632 | 1.069617688 | 0.196838 | 5.433987 | 5.51E-08 | 2.81E-07 |
| 7220  | FAM110C   | 78.18166406 | 1.069452716 | 0.286128 | 3.737669 | 0.000186 | 0.000504 |
| 9890  | PLIN4     | 144.005742  | 1.068861384 | 0.397204 | 2.690961 | 0.007125 | 0.01412  |
| 861   | C1orf69   | 289.5364373 | 1.068526217 | 0.124027 | 8.615278 | 6.98E-18 | 1.59E-16 |
| 1146  | GBA2      | 1615.414315 | 1.068502442 | 0.132039 | 8.092303 | 5.85E-16 | 1.00E-14 |
| 10269 | TRPM1     | 1.419674196 | 1.068496588 | 0.417674 | 2.558207 | 0.010521 | 0.020084 |
| 885   | SOS2      | 1291.278513 | 1.068294167 | 0.124814 | 8.559057 | 1.14E-17 | 2.52E-16 |
| 8464  | PDE3B     | 245.6005057 | 1.066939485 | 0.331211 | 3.221333 | 0.001276 | 0.002955 |
| 7118  | C3orf52   | 88.54601783 | 1.066779498 | 0.282366 | 3.778007 | 0.000158 | 0.000435 |
| 11167 | DRD2      | 3.312453802 | 1.066250802 | 0.477624 | 2.232406 | 0.025588 | 0.044914 |
| 4328  | TMTC1     | 1212.010874 | 1.065570375 | 0.207211 | 5.142453 | 2.71E-07 | 1.23E-06 |
| 2452  | RGNEF     | 1439.680386 | 1.065183154 | 0.163605 | 6.51071  | 7.48E-11 | 5.98E-10 |
| 7967  | GPT       | 236.6908262 | 1.065066137 | 0.311208 | 3.422364 | 0.000621 | 0.001527 |
| 1852  | TOB1      | 1430.234825 | 1.064638598 | 0.149238 | 7.133833 | 9.76E-13 | 1.03E-11 |
| 4113  | ZDHHC3    | 1588.672444 | 1.064578605 | 0.201899 | 5.272816 | 1.34E-07 | 6.40E-07 |
| 1287  | ANKRD12   | 1156.527056 | 1.064512335 | 0.135142 | 7.876987 | 3.35E-15 | 5.10E-14 |
| 2116  | OTUD3     | 339.4022921 | 1.064359561 | 0.155789 | 6.832038 | 8.37E-12 | 7.76E-11 |
| 130   | CDADC1    | 241.2861791 | 1.064351686 | 0.08994  | 11.83401 | 2.60E-32 | 3.93E-30 |

|       |          |             |             |          |          |          |          |
|-------|----------|-------------|-------------|----------|----------|----------|----------|
| 722   | MED21    | 537.2915414 | 1.064215352 | 0.118775 | 8.959909 | 3.25E-19 | 8.82E-18 |
| 1671  | CD2AP    | 2021.22677  | 1.064127657 | 0.145117 | 7.332904 | 2.25E-13 | 2.64E-12 |
| 12598 | CNKS2    | 1.895522221 | 1.064079321 | 0.599784 | 1.774103 | 0.076046 | 0.118319 |
| 13794 | FUT9     | 4.72050655  | 1.063907329 | 0.766281 | 1.388403 | 0.165014 | 0.234482 |
| 8819  | CETN4P   | 2.262116897 | 1.062941435 | 0.344874 | 3.082112 | 0.002055 | 0.004568 |
| 14325 | CDH19    | 1.838945818 | 1.062827335 | 0.869004 | 1.223041 | 0.221314 | 0.302826 |
| 3353  | KLHL11   | 42.21326546 | 1.062803492 | 0.183926 | 5.778434 | 7.54E-09 | 4.41E-08 |
| 4588  | CRB3     | 340.4853865 | 1.062227446 | 0.212777 | 4.992219 | 5.97E-07 | 2.55E-06 |
| 8599  | GJB1     | 340.6517895 | 1.062042175 | 0.334501 | 3.175001 | 0.001498 | 0.003415 |
| 2417  | C5orf41  | 775.7147632 | 1.061378354 | 0.162259 | 6.541277 | 6.10E-11 | 4.95E-10 |
| 1754  | VPS13D   | 1525.725136 | 1.061120075 | 0.146584 | 7.239002 | 4.52E-13 | 5.05E-12 |
| 3329  | CABLES1  | 828.263161  | 1.060789967 | 0.182996 | 5.796787 | 6.76E-09 | 3.98E-08 |
| 8455  | EBF2     | 102.7911464 | 1.060751329 | 0.328723 | 3.226889 | 0.001251 | 0.002901 |
| 11000 | CRNA0003 | 0.83163458  | 1.060078941 | 0.463149 | 2.28885  | 0.022088 | 0.039359 |
| 1627  | SLK      | 1781.543633 | 1.059041778 | 0.14328  | 7.391424 | 1.45E-13 | 1.75E-12 |
| 13858 | CA7      | 0.337802832 | 1.056829255 | 0.773735 | 1.36588  | 0.171977 | 0.243247 |
| 10013 | HPGD     | 432.1270005 | 1.056786603 | 0.398958 | 2.648864 | 0.008076 | 0.01581  |
| 5182  | CHDH     | 604.5976433 | 1.056750203 | 0.225597 | 4.684248 | 2.81E-06 | 1.06E-05 |
| 7035  | SLC4A4   | 4688.708363 | 1.056738998 | 0.277667 | 3.805777 | 0.000141 | 0.000394 |
| 1485  | BPHL     | 491.7801693 | 1.05668326  | 0.139155 | 7.593583 | 3.11E-14 | 4.11E-13 |
| 1240  | WWP1     | 1735.573944 | 1.056553045 | 0.13306  | 7.940416 | 2.02E-15 | 3.19E-14 |
| 1230  | PIK3C2A  | 2003.408042 | 1.056437803 | 0.132566 | 7.969157 | 1.60E-15 | 2.55E-14 |
| 8239  | CCL2     | 2476.209338 | 1.055057368 | 0.318233 | 3.315365 | 0.000915 | 0.002177 |
| 1601  | SATL1    | 29.68174845 | 1.054417617 | 0.14213  | 7.418705 | 1.18E-13 | 1.45E-12 |
| 604   | RAVER2   | 557.2603886 | 1.053388962 | 0.113195 | 9.30599  | 1.33E-20 | 4.31E-19 |
| 5468  | EFHA2    | 153.9061018 | 1.053292808 | 0.232291 | 4.534359 | 5.78E-06 | 2.07E-05 |
| 6790  | RGL3     | 498.4259995 | 1.052505759 | 0.269637 | 3.903416 | 9.48E-05 | 0.000274 |
| 539   | SPAG9    | 3401.71666  | 1.052458619 | 0.110825 | 9.496601 | 2.17E-21 | 7.89E-20 |
| 3638  | GNA11    | 585.2918561 | 1.051337291 | 0.18846  | 5.57857  | 2.43E-08 | 1.31E-07 |
| 7287  | C22orf45 | 107.9678616 | 1.050571308 | 0.283529 | 3.705341 | 0.000211 | 0.000568 |
| 6686  | SLC25A34 | 100.9453228 | 1.050511874 | 0.26615  | 3.947063 | 7.91E-05 | 0.000232 |
| 435   | C1orf26  | 199.5786162 | 1.050373489 | 0.106348 | 9.87677  | 5.25E-23 | 2.37E-21 |
| 1170  | NAA30    | 616.8155354 | 1.050202611 | 0.130248 | 8.063082 | 7.44E-16 | 1.25E-14 |
| 4218  | GPR160   | 854.963346  | 1.049480938 | 0.201846 | 5.199422 | 2.00E-07 | 9.29E-07 |
| 4151  | ZNF154   | 87.95717982 | 1.049234001 | 0.199828 | 5.25068  | 1.52E-07 | 7.16E-07 |
| 1544  | PEX7     | 188.3775712 | 1.049063337 | 0.139869 | 7.500335 | 6.37E-14 | 8.08E-13 |
| 4460  | C21orf34 | 39.48500335 | 1.048841489 | 0.207153 | 5.063126 | 4.12E-07 | 1.81E-06 |
| 3382  | FAM63A   | 768.0326037 | 1.048076434 | 0.18202  | 5.758026 | 8.51E-09 | 4.93E-08 |
| 14721 | CCDC27   | 0.329542788 | 1.046951278 | 0.958452 | 1.092336 | 0.274685 | 0.365743 |
| 4172  | DDO      | 186.7740185 | 1.046497758 | 0.199909 | 5.234866 | 1.65E-07 | 7.76E-07 |
| 1262  | ZNF549   | 151.3830094 | 1.04631073  | 0.132247 | 7.911768 | 2.54E-15 | 3.94E-14 |
| 15775 | KRTAP5-4 | 0.304037844 | 1.046076008 | 1.335852 | 0.783078 | 0.433582 | 0.538741 |
| 2558  | DYNC2H1  | 523.6118794 | 1.045938879 | 0.162961 | 6.418329 | 1.38E-10 | 1.06E-09 |
| 15762 | DSG4     | 0.256761341 | 1.045784495 | 1.329208 | 0.786773 | 0.431415 | 0.536491 |
| 16731 | IRS4     | 0.254746281 | 1.045779238 | 2.046052 | 0.511121 | 0.609267 | 0.713779 |
| 2935  | NHLRC2   | 152.3783619 | 1.045660937 | 0.171976 | 6.080273 | 1.20E-09 | 8.01E-09 |
| 1537  | MARS2    | 208.2085102 | 1.045506962 | 0.139251 | 7.508097 | 6.00E-14 | 7.65E-13 |

|       |           |             |             |          |          |          |          |
|-------|-----------|-------------|-------------|----------|----------|----------|----------|
| 4540  | PRKAG2    | 1355.307226 | 1.044140671 | 0.208269 | 5.01343  | 5.35E-07 | 2.31E-06 |
| 3151  | SLC39A8   | 1037.039942 | 1.043795211 | 0.176274 | 5.921432 | 3.19E-09 | 1.99E-08 |
| 9605  | RGS6      | 7.953649164 | 1.04324426  | 0.375526 | 2.778091 | 0.005468 | 0.011158 |
| 2332  | DTWD2     | 300.2676226 | 1.043159555 | 0.157525 | 6.62217  | 3.54E-11 | 2.98E-10 |
| 12902 | CYP2B6    | 8.79615927  | 1.042911252 | 0.623624 | 1.672339 | 0.094458 | 0.143491 |
| 6012  | PKDREJ    | 13.11058707 | 1.042659797 | 0.244757 | 4.259987 | 2.04E-05 | 6.67E-05 |
| 10070 | SRRM4     | 14.30618974 | 1.042070065 | 0.396315 | 2.629396 | 0.008554 | 0.016649 |
| 8315  | LOC148709 | 8.762805473 | 1.041529985 | 0.317056 | 3.284998 | 0.00102  | 0.002404 |
| 1175  | PDE12     | 545.9198634 | 1.041522895 | 0.129306 | 8.0547   | 7.97E-16 | 1.33E-14 |
| 8568  | GGT8P     | 58.53959778 | 1.041304825 | 0.326982 | 3.184595 | 0.00145  | 0.003316 |
| 222   | KLHL9     | 1309.052611 | 1.041077692 | 0.094487 | 11.01819 | 3.12E-28 | 2.76E-26 |
| 2225  | ARFGF2    | 1938.034236 | 1.040914815 | 0.154683 | 6.729349 | 1.70E-11 | 1.50E-10 |
| 5459  | AMIGO1    | 236.8968264 | 1.040747192 | 0.229313 | 4.538543 | 5.66E-06 | 2.03E-05 |
| 1316  | RHPN2     | 1030.534375 | 1.040622204 | 0.132737 | 7.839721 | 4.52E-15 | 6.73E-14 |
| 1126  | ZNF770    | 1325.016656 | 1.040620898 | 0.128171 | 8.119026 | 4.70E-16 | 8.18E-15 |
| 3877  | TMEM25    | 317.1227505 | 1.040041187 | 0.192011 | 5.416572 | 6.08E-08 | 3.07E-07 |
| 11665 | OLIG1     | 75.24923568 | 1.039782957 | 0.50508  | 2.058651 | 0.039528 | 0.066419 |
| 4681  | MASP2     | 20.56561001 | 1.039183569 | 0.210349 | 4.940272 | 7.80E-07 | 3.27E-06 |
| 1260  | SYNE2     | 3995.363187 | 1.03892178  | 0.131272 | 7.914252 | 2.49E-15 | 3.87E-14 |
| 12176 | OVCH1     | 0.494695204 | 1.038628309 | 0.545585 | 1.903695 | 0.05695  | 0.091678 |
| 3109  | ZNF582    | 37.59772425 | 1.037479934 | 0.174234 | 5.954527 | 2.61E-09 | 1.64E-08 |
| 9186  | PDK4      | 16995.97097 | 1.037318893 | 0.352321 | 2.944247 | 0.003237 | 0.006908 |
| 1025  | RWDD4A    | 666.6572719 | 1.037101193 | 0.124997 | 8.297021 | 1.07E-16 | 2.04E-15 |
| 2398  | CDC14A    | 220.9445047 | 1.037056532 | 0.158073 | 6.560621 | 5.36E-11 | 4.38E-10 |
| 7856  | NFKBID    | 67.57592434 | 1.036734512 | 0.298892 | 3.468593 | 0.000523 | 0.001305 |
| 3697  | NINL      | 422.1210717 | 1.036699499 | 0.187257 | 5.536225 | 3.09E-08 | 1.64E-07 |
| 4219  | TRAM1L1   | 119.6347863 | 1.036395904 | 0.199354 | 5.198763 | 2.01E-07 | 9.32E-07 |
| 10376 | UGT1A9    | 4347.032443 | 1.036192565 | 0.412187 | 2.513888 | 0.011941 | 0.022557 |
| 9101  | DC1001286 | 11.63828284 | 1.035838587 | 0.348092 | 2.975764 | 0.002923 | 0.006294 |
| 4167  | FRK       | 155.9035691 | 1.034365582 | 0.197482 | 5.23776  | 1.63E-07 | 7.65E-07 |
| 1965  | SPTLC2    | 1778.125773 | 1.033967782 | 0.147424 | 7.013569 | 2.32E-12 | 2.32E-11 |
| 10855 | PPAPDC1A  | 27.26496005 | 1.03383681  | 0.442174 | 2.338075 | 0.019383 | 0.035001 |
| 5913  | RAB11FIP4 | 396.0238127 | 1.033308893 | 0.239395 | 4.316327 | 1.59E-05 | 5.26E-05 |
| 6778  | RBP7      | 528.7590092 | 1.032261792 | 0.264164 | 3.907651 | 9.32E-05 | 0.000269 |
| 9216  | C13orf38  | 6.431077386 | 1.032115051 | 0.351894 | 2.93303  | 0.003357 | 0.007139 |
| 9423  | PCDHGA7   | 80.91085932 | 1.031820578 | 0.36202  | 2.850172 | 0.00437  | 0.009089 |
| 2759  | KPNA5     | 78.48783604 | 1.03161792  | 0.16552  | 6.232604 | 4.59E-10 | 3.26E-09 |
| 4094  | SHE       | 443.2517583 | 1.031228408 | 0.195163 | 5.283921 | 1.26E-07 | 6.05E-07 |
| 9057  | ACP5      | 2913.779042 | 1.031101332 | 0.344258 | 2.99514  | 0.002743 | 0.005937 |
| 7756  | GRIK3     | 444.8208561 | 1.03110113  | 0.293233 | 3.516315 | 0.000438 | 0.001106 |
| 10976 | BAI3      | 11.33472685 | 1.030977534 | 0.449294 | 2.294663 | 0.021752 | 0.038846 |
| 3497  | EXOC6B    | 175.5801924 | 1.030546228 | 0.181527 | 5.677083 | 1.37E-08 | 7.68E-08 |
| 2048  | ENOSF1    | 897.5647661 | 1.030293126 | 0.149147 | 6.907907 | 4.92E-12 | 4.71E-11 |
| 4830  | ZNF483    | 25.30319271 | 1.029929888 | 0.211227 | 4.87594  | 1.08E-06 | 4.39E-06 |
| 14865 | HRK       | 1.917469639 | 1.029584414 | 0.982681 | 1.04773  | 0.294763 | 0.388675 |
| 975   | PPARA     | 1192.354576 | 1.02931726  | 0.122777 | 8.383604 | 5.13E-17 | 1.03E-15 |
| 2274  | CCNG2     | 1969.255466 | 1.028926967 | 0.154161 | 6.674349 | 2.48E-11 | 2.14E-10 |

|       |          |             |             |          |          |          |          |
|-------|----------|-------------|-------------|----------|----------|----------|----------|
| 504   | HADHB    | 4461.776344 | 1.028643893 | 0.107165 | 9.598663 | 8.10E-22 | 3.15E-20 |
| 1915  | NUDT7    | 144.2555992 | 1.027848695 | 0.145329 | 7.072569 | 1.52E-12 | 1.56E-11 |
| 549   | CD46     | 6404.624853 | 1.027278622 | 0.108613 | 9.458128 | 3.14E-21 | 1.12E-19 |
| 3051  | AIFM1    | 2218.839809 | 1.027089491 | 0.171232 | 5.998232 | 1.99E-09 | 1.28E-08 |
| 4099  | CRYZ     | 4576.78074  | 1.026646932 | 0.194378 | 5.281712 | 1.28E-07 | 6.12E-07 |
| 1134  | ZNF780B  | 292.3652138 | 1.026168331 | 0.126504 | 8.111772 | 4.99E-16 | 8.62E-15 |
| 3008  | TNIK     | 446.9093858 | 1.024762439 | 0.169972 | 6.029006 | 1.65E-09 | 1.08E-08 |
| 7811  | CHRM3    | 26.71834053 | 1.024555575 | 0.29293  | 3.497613 | 0.000469 | 0.001178 |
| 432   | WDFY3    | 2291.763746 | 1.02396216  | 0.103441 | 9.898973 | 4.21E-23 | 1.91E-21 |
| 8038  | DSCR6    | 3.022252122 | 1.023686329 | 0.301417 | 3.396243 | 0.000683 | 0.001666 |
| 5424  | LRRC70   | 115.5608674 | 1.023490722 | 0.224699 | 4.55495  | 5.24E-06 | 1.89E-05 |
| 10169 | VTCN1    | 20.59729718 | 1.023472422 | 0.394662 | 2.593286 | 0.009506 | 0.018324 |
| 2783  | CLN8     | 712.1530228 | 1.021316134 | 0.16443  | 6.21124  | 5.26E-10 | 3.70E-09 |
| 6576  | FAM124A  | 65.31230103 | 1.020667237 | 0.255628 | 3.99279  | 6.53E-05 | 0.000195 |
| 832   | GFM2     | 732.4449441 | 1.020615928 | 0.117644 | 8.67548  | 4.12E-18 | 9.70E-17 |
| 2155  | COMMD8   | 448.3983861 | 1.020518387 | 0.14996  | 6.805293 | 1.01E-11 | 9.17E-11 |
| 2883  | ZNF367   | 159.3351998 | 1.020394346 | 0.166641 | 6.123293 | 9.17E-10 | 6.23E-09 |
| 10124 | UGT2B11  | 5.104811816 | 1.019759839 | 0.391103 | 2.607396 | 0.009123 | 0.017664 |
| 13086 | HS3ST5   | 1.073386347 | 1.019605685 | 0.630511 | 1.617109 | 0.105855 | 0.158556 |
| 506   | RCHY1    | 571.6628109 | 1.018240793 | 0.10625  | 9.583463 | 9.38E-22 | 3.64E-20 |
| 3857  | ARL15    | 639.5023948 | 1.018186925 | 0.18759  | 5.427716 | 5.71E-08 | 2.90E-07 |
| 1281  | NAP1L5   | 180.6439488 | 1.017793782 | 0.129021 | 7.88856  | 3.06E-15 | 4.68E-14 |
| 880   | CPT2     | 930.9545987 | 1.017652233 | 0.118713 | 8.572382 | 1.01E-17 | 2.26E-16 |
| 1167  | MCCC1    | 757.1875191 | 1.017363635 | 0.12613  | 8.065988 | 7.26E-16 | 1.22E-14 |
| 3603  | ALAS1    | 1000.589357 | 1.016750822 | 0.181439 | 5.603808 | 2.10E-08 | 1.14E-07 |
| 10921 | EHF      | 28.59842532 | 1.016214326 | 0.439598 | 2.31169  | 0.020795 | 0.037322 |
| 1395  | TRIP11   | 765.8568005 | 1.015468751 | 0.131485 | 7.723048 | 1.14E-14 | 1.60E-13 |
| 577   | CCDC121  | 103.3336231 | 1.014536104 | 0.108132 | 9.382392 | 6.45E-21 | 2.19E-19 |
| 2684  | FAM84B   | 1516.284518 | 1.014007318 | 0.161073 | 6.295345 | 3.07E-10 | 2.24E-09 |
| 3851  | PPP1R9A  | 509.5699498 | 1.013753331 | 0.18659  | 5.433048 | 5.54E-08 | 2.82E-07 |
| 1560  | KIAA2018 | 672.0005117 | 1.013287509 | 0.135501 | 7.478067 | 7.54E-14 | 9.48E-13 |
| 3250  | CX3CL1   | 4123.248884 | 1.013249153 | 0.173121 | 5.85284  | 4.83E-09 | 2.91E-08 |
| 10901 | PKLR     | 639.2887581 | 1.01291578  | 0.436314 | 2.32153  | 0.020258 | 0.036426 |
| 8537  | CADM4    | 311.351956  | 1.012256589 | 0.316989 | 3.193348 | 0.001406 | 0.003229 |
| 738   | ZNF658   | 55.71484216 | 1.011845928 | 0.113458 | 8.918254 | 4.74E-19 | 1.26E-17 |
| 7347  | DGKI     | 33.51210961 | 1.011149194 | 0.274574 | 3.682614 | 0.000231 | 0.000616 |
| 5415  | ATP6V1G2 | 23.22188304 | 1.011103506 | 0.221808 | 4.558458 | 5.15E-06 | 1.87E-05 |
| 5012  | ICA1     | 255.550464  | 1.010830787 | 0.212093 | 4.765982 | 1.88E-06 | 7.35E-06 |
| 11437 | SIGLEC15 | 11.34234093 | 1.010802168 | 0.472744 | 2.138159 | 0.032504 | 0.055706 |
| 4795  | ACACB    | 1092.016287 | 1.01061423  | 0.206685 | 4.889644 | 1.01E-06 | 4.13E-06 |
| 11089 | GCNT7    | 0.619233853 | 1.010281626 | 0.447078 | 2.259746 | 0.023837 | 0.042135 |
| 1314  | C8orf37  | 92.22547836 | 1.009950966 | 0.128799 | 7.841306 | 4.46E-15 | 6.65E-14 |
| 3853  | OXNAD1   | 232.3845856 | 1.009139833 | 0.1858   | 5.431333 | 5.59E-08 | 2.85E-07 |
| 822   | HOMEZ    | 334.9493199 | 1.008778492 | 0.115904 | 8.703605 | 3.22E-18 | 7.67E-17 |
| 3319  | C4orf33  | 298.1023293 | 1.008698114 | 0.173788 | 5.804174 | 6.47E-09 | 3.82E-08 |
| 6978  | SNURF    | 92.11893778 | 1.008617539 | 0.263044 | 3.834401 | 0.000126 | 0.000354 |
| 5660  | ARHGAP28 | 308.4746776 | 1.008445832 | 0.226998 | 4.442537 | 8.89E-06 | 3.08E-05 |

|       |           |             |             |          |          |          |          |
|-------|-----------|-------------|-------------|----------|----------|----------|----------|
| 6330  | TMEM101   | 1174.050775 | 1.008006646 | 0.24509  | 4.112809 | 3.91E-05 | 0.000121 |
| 382   | ETFA      | 1667.822806 | 1.007761905 | 0.099595 | 10.11862 | 4.57E-24 | 2.34E-22 |
| 8257  | ABCG5     | 3.66254806  | 1.006133382 | 0.303962 | 3.310059 | 0.000933 | 0.002214 |
| 1664  | FAHD1     | 1679.309008 | 1.00605796  | 0.137023 | 7.342245 | 2.10E-13 | 2.47E-12 |
| 13131 | TDRD12    | 0.587421154 | 1.00605666  | 0.629388 | 1.598469 | 0.109939 | 0.164108 |
| 3995  | ZNF221    | 17.73135234 | 1.006041836 | 0.188269 | 5.343652 | 9.11E-08 | 4.47E-07 |
| 1243  | ZYG11B    | 1301.26045  | 1.005596079 | 0.126687 | 7.937669 | 2.06E-15 | 3.25E-14 |
| 6715  | ENPEP     | 8992.147341 | 1.00477329  | 0.255382 | 3.93439  | 8.34E-05 | 0.000243 |
| 4807  | FAM171A1  | 587.8212788 | 1.004542954 | 0.205683 | 4.883935 | 1.04E-06 | 4.24E-06 |
| 918   | DLST      | 2608.913255 | 1.004276697 | 0.11824  | 8.493543 | 2.00E-17 | 4.28E-16 |
| 11264 | GRIK1     | 1.871403014 | 1.003960605 | 0.457674 | 2.193614 | 0.028263 | 0.049182 |
| 3058  | DGKE      | 199.2019521 | 1.003237714 | 0.167407 | 5.9928   | 2.06E-09 | 1.32E-08 |
| 4438  | TLN2      | 1624.994941 | 1.003167471 | 0.197485 | 5.079722 | 3.78E-07 | 1.67E-06 |
| 9757  | VAT1L     | 61.18391642 | 1.002861516 | 0.36733  | 2.730141 | 0.006331 | 0.012718 |
| 2280  | LRRC1     | 317.993179  | 1.002752743 | 0.15032  | 6.670793 | 2.54E-11 | 2.19E-10 |
| 3213  | TEX9      | 105.5016549 | 1.002282812 | 0.170491 | 5.878801 | 4.13E-09 | 2.52E-08 |
| 13298 | GPR26     | 1.539602399 | 1.001791228 | 0.649101 | 1.543351 | 0.122746 | 0.180925 |
| 7086  | PLIN2     | 20008.12581 | 1.001143638 | 0.264179 | 3.789646 | 0.000151 | 0.000417 |
| 1148  | CBWD1     | 729.1816645 | 1.001084872 | 0.123747 | 8.089803 | 5.98E-16 | 1.02E-14 |
| 2497  | ADD3      | 3227.556635 | 1.000613934 | 0.154782 | 6.464665 | 1.02E-10 | 7.97E-10 |
| 4863  | HIST1H2AC | 1117.961169 | 1.000466506 | 0.206049 | 4.855472 | 1.20E-06 | 4.84E-06 |
| 11180 | FLJ34503  | 1.209933554 | 1.000194466 | 0.448654 | 2.229323 | 0.025792 | 0.045223 |
| 14306 | TRDN      | 1.382020034 | 0.999755183 | 0.8144   | 1.227597 | 0.219598 | 0.300877 |
| 2216  | SNX13     | 1527.320363 | 0.999489037 | 0.14829  | 6.740079 | 1.58E-11 | 1.40E-10 |
| 1402  | YOD1      | 344.4830656 | 0.998979605 | 0.129534 | 7.712117 | 1.24E-14 | 1.73E-13 |
| 8209  | SLC25A27  | 172.4813128 | 0.998879701 | 0.300137 | 3.328077 | 0.000874 | 0.002088 |
| 1609  | SPOPL     | 920.6979479 | 0.998810835 | 0.134774 | 7.411006 | 1.25E-13 | 1.53E-12 |
| 4928  | LOC402377 | 5.894995657 | 0.998784637 | 0.20756  | 4.812026 | 1.49E-06 | 5.94E-06 |
| 7944  | RUNDC3B   | 92.58648562 | 0.998682751 | 0.291166 | 3.429948 | 0.000604 | 0.00149  |
| 1277  | IVD       | 1838.512395 | 0.998398445 | 0.126474 | 7.894116 | 2.92E-15 | 4.49E-14 |
| 1056  | FAM108B1  | 392.6499389 | 0.997808979 | 0.121157 | 8.235691 | 1.79E-16 | 3.31E-15 |
| 7428  | SPATA4    | 13.22417143 | 0.997418225 | 0.273641 | 3.644989 | 0.000267 | 0.000706 |
| 11239 | PDZRN4    | 13.83983985 | 0.996888812 | 0.452251 | 2.204282 | 0.027505 | 0.047968 |
| 2999  | FAM164A   | 376.1650036 | 0.996786607 | 0.165243 | 6.032231 | 1.62E-09 | 1.06E-08 |
| 4894  | C13orf15  | 1415.654187 | 0.996039719 | 0.206247 | 4.829362 | 1.37E-06 | 5.49E-06 |
| 7648  | MSI1      | 19.37231963 | 0.995977226 | 0.279689 | 3.561011 | 0.000369 | 0.000947 |
| 621   | PRMT10    | 228.5545562 | 0.995256435 | 0.107641 | 9.246032 | 2.33E-20 | 7.35E-19 |
| 5432  | ARSJ      | 494.7530537 | 0.995148839 | 0.218627 | 4.551809 | 5.32E-06 | 1.92E-05 |
| 2833  | ACOT2     | 384.9068216 | 0.994638893 | 0.16148  | 6.159513 | 7.30E-10 | 5.05E-09 |
| 12084 | LDHC      | 9.659169466 | 0.994561003 | 0.514664 | 1.932447 | 0.053304 | 0.086463 |
| 5450  | ZSCAN23   | 19.95047591 | 0.99446882  | 0.218942 | 4.542155 | 5.57E-06 | 2.00E-05 |
| 5805  | GNRHR     | 6.239651692 | 0.994313852 | 0.227451 | 4.371548 | 1.23E-05 | 4.16E-05 |
| 1718  | NAPEPLD   | 676.3197871 | 0.993670527 | 0.136505 | 7.279345 | 3.35E-13 | 3.83E-12 |
| 1491  | PPP1R13B  | 556.8321498 | 0.99257305  | 0.130872 | 7.584302 | 3.34E-14 | 4.39E-13 |
| 3642  | PAR6B     | 748.1739712 | 0.991719674 | 0.17782  | 5.577109 | 2.45E-08 | 1.32E-07 |
| 4924  | CYP7B1    | 227.9675539 | 0.991218046 | 0.205828 | 4.815757 | 1.47E-06 | 5.84E-06 |
| 9000  | ROBO2     | 45.64139387 | 0.99113154  | 0.32905  | 3.012099 | 0.002594 | 0.00565  |



|       |          |             |             |          |          |          |          |
|-------|----------|-------------|-------------|----------|----------|----------|----------|
| 9008  | SLC5A4   | 25.29980364 | 0.991017584 | 0.329358 | 3.008942 | 0.002622 | 0.005704 |
| 1899  | ATPBD4   | 160.7366358 | 0.990900224 | 0.1398   | 7.087962 | 1.36E-12 | 1.40E-11 |
| 1605  | SNX29    | 1787.390845 | 0.990648059 | 0.133562 | 7.417119 | 1.20E-13 | 1.46E-12 |
| 5806  | SUSD1    | 428.4804718 | 0.990517668 | 0.226581 | 4.371583 | 1.23E-05 | 4.16E-05 |
| 2001  | TTC7B    | 748.0120528 | 0.990386669 | 0.142356 | 6.957104 | 3.47E-12 | 3.40E-11 |
| 3144  | SAMD4A   | 823.8522299 | 0.989994679 | 0.167037 | 5.926791 | 3.09E-09 | 1.93E-08 |
| 5355  | VEPH1    | 449.5801882 | 0.989413434 | 0.215463 | 4.592037 | 4.39E-06 | 1.61E-05 |
| 6305  | FAM198B  | 2621.667447 | 0.988968128 | 0.239781 | 4.124468 | 3.72E-05 | 0.000116 |
| 6878  | CASC1    | 52.27342054 | 0.988551566 | 0.255302 | 3.872085 | 0.000108 | 0.000308 |
| 15335 | OR10K2   | 0.276560016 | 0.988078106 | 1.085722 | 0.910066 | 0.362788 | 0.463711 |
| 1778  | PLEKHF2  | 660.7029404 | 0.987967734 | 0.13706  | 7.208273 | 5.67E-13 | 6.25E-12 |
| 2227  | PLA2G12A | 1122.096837 | 0.987494866 | 0.146892 | 6.722605 | 1.79E-11 | 1.57E-10 |
| 9719  | C6orf123 | 12.17678713 | 0.9872042   | 0.360007 | 2.742177 | 0.006103 | 0.012309 |
| 11094 | SOSTDC1  | 65.89748368 | 0.98704109  | 0.437336 | 2.256939 | 0.024012 | 0.042424 |
| 13996 | C1orf111 | 0.422589645 | 0.987018403 | 0.748324 | 1.318971 | 0.187179 | 0.262139 |
| 2555  | TRUB1    | 643.5116703 | 0.986583776 | 0.153603 | 6.422936 | 1.34E-10 | 1.03E-09 |
| 581   | KIAA1012 | 1062.139561 | 0.986450544 | 0.105252 | 9.372246 | 7.10E-21 | 2.40E-19 |
| 631   | ACAD8    | 523.0937736 | 0.98566565  | 0.10709  | 9.204117 | 3.44E-20 | 1.07E-18 |
| 10510 | TMEM132F | 172.1815605 | 0.985611631 | 0.399242 | 2.468706 | 0.01356  | 0.02529  |
| 7312  | HUNK     | 193.5353045 | 0.985254998 | 0.266612 | 3.695458 | 0.000219 | 0.000588 |
| 5247  | SALL1    | 1442.870963 | 0.984914512 | 0.211681 | 4.65283  | 3.27E-06 | 1.22E-05 |
| 7929  | DTNA     | 205.1406648 | 0.984315266 | 0.286401 | 3.436837 | 0.000589 | 0.001455 |
| 5198  | GP1BA    | 19.637698   | 0.983640981 | 0.210254 | 4.678351 | 2.89E-06 | 1.09E-05 |
| 4871  | TMEM8B   | 478.60696   | 0.982964986 | 0.202686 | 4.849698 | 1.24E-06 | 4.98E-06 |
| 3420  | GKAP1    | 99.67283584 | 0.98281221  | 0.171553 | 5.728909 | 1.01E-08 | 5.79E-08 |
| 7636  | NLRP14   | 5.556982543 | 0.982130766 | 0.275416 | 3.565986 | 0.000362 | 0.00093  |
| 8262  | NRXN2    | 630.3822647 | 0.982086652 | 0.296919 | 3.307596 | 0.000941 | 0.002232 |
| 2262  | C9orf82  | 517.133047  | 0.982072037 | 0.14686  | 6.687132 | 2.28E-11 | 1.97E-10 |
| 4764  | CAPS2    | 60.30482646 | 0.981784551 | 0.200256 | 4.902637 | 9.46E-07 | 3.89E-06 |
| 4656  | ZNF165   | 53.55399229 | 0.981086945 | 0.197894 | 4.957635 | 7.14E-07 | 3.00E-06 |
| 6256  | FLT1     | 10056.70851 | 0.980998004 | 0.236249 | 4.152396 | 3.29E-05 | 0.000103 |
| 1451  | RDX      | 2891.468712 | 0.980240949 | 0.128421 | 7.633053 | 2.29E-14 | 3.10E-13 |
| 9354  | ADAMTS1  | 58.02310996 | 0.980234115 | 0.340534 | 2.878522 | 0.003995 | 0.008372 |
| 1698  | ELMOD2   | 238.3086847 | 0.980094256 | 0.134361 | 7.294495 | 3.00E-13 | 3.46E-12 |
| 2392  | IGF1R    | 2308.577443 | 0.979426203 | 0.149151 | 6.566661 | 5.15E-11 | 4.22E-10 |
| 8405  | SMAD9    | 125.9050744 | 0.979294885 | 0.301582 | 3.247198 | 0.001165 | 0.002718 |
| 1860  | DIP2C    | 1322.571966 | 0.979250444 | 0.137399 | 7.127038 | 1.03E-12 | 1.08E-11 |
| 1962  | C2orf67  | 1345.718591 | 0.979186004 | 0.139516 | 7.018428 | 2.24E-12 | 2.24E-11 |
| 2938  | TXNDC16  | 350.367188  | 0.978826969 | 0.161005 | 6.07947  | 1.21E-09 | 8.04E-09 |
| 5749  | ZNF229   | 130.3604426 | 0.978632762 | 0.222535 | 4.39765  | 1.09E-05 | 3.73E-05 |
| 711   | METTL14  | 318.9795088 | 0.978548418 | 0.108905 | 8.985364 | 2.58E-19 | 7.11E-18 |
| 1626  | SPAG16   | 361.6376349 | 0.976426979 | 0.132096 | 7.391801 | 1.45E-13 | 1.75E-12 |
| 5934  | ZNF813   | 76.12419317 | 0.976318125 | 0.226977 | 4.301401 | 1.70E-05 | 5.61E-05 |
| 3926  | SLC45A4  | 761.5603886 | 0.976094901 | 0.181232 | 5.385895 | 7.21E-08 | 3.60E-07 |
| 2552  | KIAA1549 | 471.0777463 | 0.976068537 | 0.151946 | 6.423784 | 1.33E-10 | 1.02E-09 |
| 5245  | GPR155   | 582.5808909 | 0.975946191 | 0.209747 | 4.652978 | 3.27E-06 | 1.22E-05 |
| 509   | SETD3    | 2519.552202 | 0.975400578 | 0.101872 | 9.574756 | 1.02E-21 | 3.93E-20 |

|       |                      |             |             |          |          |          |          |
|-------|----------------------|-------------|-------------|----------|----------|----------|----------|
| 6426  | ZNF233               | 28.04979529 | 0.975327097 | 0.240139 | 4.061509 | 4.88E-05 | 0.000149 |
| 5644  | MPP6                 | 206.3026448 | 0.975283239 | 0.219086 | 4.451598 | 8.52E-06 | 2.96E-05 |
| 6073  | CCND1                | 18322.80926 | 0.974957583 | 0.230345 | 4.232605 | 2.31E-05 | 7.46E-05 |
| 13757 | SCN7A                | 2.110188922 | 0.974514798 | 0.695138 | 1.401902 | 0.160945 | 0.229324 |
| 8975  | TACR1                | 22.95148542 | 0.974083726 | 0.322328 | 3.02203  | 0.002511 | 0.005484 |
| 3118  | DHTKD1               | 1304.340755 | 0.973675531 | 0.163641 | 5.950075 | 2.68E-09 | 1.68E-08 |
| 2672  | NDUFA5               | 2575.170966 | 0.973548701 | 0.15433  | 6.308237 | 2.82E-10 | 2.07E-09 |
| 2190  | PPARG                | 525.4274981 | 0.973501655 | 0.143807 | 6.769499 | 1.29E-11 | 1.16E-10 |
| 11174 | TP53AIP1             | 3.426575259 | 0.97344305  | 0.436378 | 2.230734 | 0.025699 | 0.045081 |
| 664   | EPM2A                | 164.7087357 | 0.972863216 | 0.106591 | 9.127033 | 7.04E-20 | 2.08E-18 |
| 2932  | ATP6V1H              | 1335.228555 | 0.972643285 | 0.159825 | 6.085667 | 1.16E-09 | 7.76E-09 |
| 2038  | UQCRC2               | 4449.710336 | 0.972297086 | 0.140462 | 6.922129 | 4.45E-12 | 4.28E-11 |
| 6022  | DMGDH                | 1541.074653 | 0.972020444 | 0.228447 | 4.254915 | 2.09E-05 | 6.81E-05 |
| 1268  | SENP8                | 80.1429281  | 0.971831046 | 0.122978 | 7.902457 | 2.73E-15 | 4.23E-14 |
| 13656 | TSPAN19              | 1.226039907 | 0.971408243 | 0.675897 | 1.437214 | 0.150657 | 0.216264 |
| 3472  | ZNF426               | 110.4923555 | 0.970455361 | 0.170417 | 5.694601 | 1.24E-08 | 6.98E-08 |
| 9774  | ESPN                 | 222.7379892 | 0.970419406 | 0.35624  | 2.72406  | 0.006448 | 0.012932 |
| 2944  | FAM73A               | 816.8479356 | 0.970370438 | 0.15977  | 6.073535 | 1.25E-09 | 8.33E-09 |
| 2887  | ATP5B                | 16525.29574 | 0.969728165 | 0.15841  | 6.121624 | 9.26E-10 | 6.29E-09 |
| 10628 | CYP3A43              | 1.473267762 | 0.96961135  | 0.400223 | 2.422678 | 0.015407 | 0.028414 |
| 7567  | SGK2                 | 554.2989333 | 0.969445683 | 0.270059 | 3.589752 | 0.000331 | 0.000857 |
| 9010  | TRIM7                | 78.28039435 | 0.969220506 | 0.322208 | 3.008055 | 0.002629 | 0.00572  |
| 10682 | R5-ARHG <sup>A</sup> | 14.43054    | 0.968809035 | 0.403302 | 2.402192 | 0.016297 | 0.029905 |
| 1755  | FAM126B              | 682.3186027 | 0.968336108 | 0.133777 | 7.238416 | 4.54E-13 | 5.07E-12 |
| 3889  | PELI2                | 292.6012638 | 0.967533894 | 0.178872 | 5.409088 | 6.33E-08 | 3.19E-07 |
| 3464  | EYA3                 | 123.3236745 | 0.967473607 | 0.169799 | 5.697747 | 1.21E-08 | 6.87E-08 |
| 12332 | KCNA2                | 4.708778308 | 0.967307206 | 0.521456 | 1.855013 | 0.063594 | 0.10108  |
| 7092  | ESM1                 | 5234.461048 | 0.966669578 | 0.255194 | 3.787986 | 0.000152 | 0.00042  |
| 7593  | PCOTH                | 15.87363111 | 0.966619848 | 0.26987  | 3.581795 | 0.000341 | 0.000881 |
| 4564  | CCDC110              | 89.45063564 | 0.96633052  | 0.193168 | 5.002539 | 5.66E-07 | 2.43E-06 |
| 3255  | ZIK1                 | 76.97483066 | 0.966313859 | 0.165218 | 5.848728 | 4.95E-09 | 2.98E-08 |
| 3750  | RFK                  | 1096.314633 | 0.966121543 | 0.175454 | 5.506401 | 3.66E-08 | 1.91E-07 |
| 3963  | CCNG1                | 4642.195396 | 0.965594425 | 0.179852 | 5.368831 | 7.92E-08 | 3.92E-07 |
| 2767  | UNC13B               | 1408.023725 | 0.965330368 | 0.155115 | 6.223306 | 4.87E-10 | 3.45E-09 |
| 9798  | C19orf26             | 11.25012101 | 0.965234831 | 0.355218 | 2.717302 | 0.006582 | 0.013167 |
| 6622  | SLC15A2              | 62.99350843 | 0.96520775  | 0.242784 | 3.975581 | 7.02E-05 | 0.000208 |
| 2577  | FBXL17               | 1000.342862 | 0.964984485 | 0.150689 | 6.403821 | 1.52E-10 | 1.15E-09 |
| 3094  | C14orf159            | 1293.92419  | 0.964845663 | 0.161691 | 5.967219 | 2.41E-09 | 1.53E-08 |
| 1644  | SLC35F5              | 1411.986039 | 0.964417773 | 0.130876 | 7.368965 | 1.72E-13 | 2.05E-12 |
| 2153  | C18orf18             | 84.98032138 | 0.964302177 | 0.141651 | 6.807586 | 9.92E-12 | 9.04E-11 |
| 10373 | LRRC2                | 38.77937931 | 0.964280106 | 0.383404 | 2.515051 | 0.011902 | 0.022489 |
| 3661  | CLYBL                | 347.018573  | 0.964265476 | 0.173332 | 5.563101 | 2.65E-08 | 1.42E-07 |
| 13696 | SVOP                 | 5.665748742 | 0.964046319 | 0.67966  | 1.418425 | 0.156067 | 0.223355 |
| 1067  | SLC25A44             | 1054.657536 | 0.963217358 | 0.117255 | 8.21472  | 2.13E-16 | 3.91E-15 |
| 2077  | ZNF778               | 85.94888794 | 0.963135644 | 0.140115 | 6.87387  | 6.25E-12 | 5.90E-11 |
| 9259  | ACSL6                | 26.97349755 | 0.962982872 | 0.330657 | 2.912331 | 0.003587 | 0.007594 |
| 2019  | GLUD2                | 635.7393806 | 0.9628087   | 0.138751 | 6.939091 | 3.95E-12 | 3.83E-11 |

|       |           |             |             |          |          |          |          |
|-------|-----------|-------------|-------------|----------|----------|----------|----------|
| 13094 | IL1RAPL2  | 2.151833551 | 0.962252705 | 0.596615 | 1.612854 | 0.106776 | 0.159838 |
| 11770 | HIST1H1T  | 0.735845181 | 0.960854129 | 0.473417 | 2.029614 | 0.042396 | 0.070602 |
| 565   | FAM122A   | 545.1786004 | 0.960627543 | 0.102014 | 9.416636 | 4.66E-21 | 1.62E-19 |
| 10358 | PM20D1    | 11.66118619 | 0.96034956  | 0.380532 | 2.523699 | 0.011613 | 0.021975 |
| 4012  | FAM161A   | 138.7903718 | 0.960012572 | 0.180061 | 5.331599 | 9.74E-08 | 4.76E-07 |
| 6631  | ASRGL1    | 721.903738  | 0.959613868 | 0.2416   | 3.971917 | 7.13E-05 | 0.000211 |
| 2828  | PAR-SN    | 125.5618613 | 0.95957679  | 0.155657 | 6.164685 | 7.06E-10 | 4.89E-09 |
| 10038 | ANK1      | 171.7758564 | 0.959262166 | 0.363467 | 2.639198 | 0.00831  | 0.016227 |
| 4713  | ZMYND12   | 58.15611956 | 0.958552947 | 0.194548 | 4.927074 | 8.35E-07 | 3.47E-06 |
| 10405 | CLEC18B   | 1459.398847 | 0.958009774 | 0.382018 | 2.507759 | 0.01215  | 0.022888 |
| 8916  | CXXC4     | 6.613719536 | 0.957984531 | 0.314528 | 3.045787 | 0.002321 | 0.005102 |
| 9487  | BCMO1     | 282.3958541 | 0.957649198 | 0.339252 | 2.822824 | 0.00476  | 0.009835 |
| 13646 | EGR4      | 2.256005175 | 0.95714351  | 0.664717 | 1.439926 | 0.149888 | 0.215299 |
| 10526 | SHISA9    | 375.6726157 | 0.956839131 | 0.388822 | 2.460864 | 0.01386  | 0.02581  |
| 5158  | ATP9A     | 1543.536926 | 0.956643349 | 0.203661 | 4.697229 | 2.64E-06 | 1.00E-05 |
| 1665  | PRKD1     | 401.6778894 | 0.956474662 | 0.130304 | 7.340336 | 2.13E-13 | 2.51E-12 |
| 12657 | ALX4      | 0.703443261 | 0.955594297 | 0.544499 | 1.754997 | 0.07926  | 0.122744 |
| 1600  | PPA2      | 960.3642344 | 0.955477558 | 0.128739 | 7.4218   | 1.16E-13 | 1.42E-12 |
| 7212  | BLNK      | 354.8410297 | 0.95543489  | 0.255532 | 3.738996 | 0.000185 | 0.000502 |
| 13416 | FOXN4     | 1.298325299 | 0.955283038 | 0.632957 | 1.509238 | 0.131238 | 0.191741 |
| 4231  | C5orf4    | 802.9872822 | 0.954939197 | 0.183883 | 5.193188 | 2.07E-07 | 9.58E-07 |
| 5220  | HRSP12    | 1711.437217 | 0.954613173 | 0.204391 | 4.670532 | 3.00E-06 | 1.13E-05 |
| 11262 | PLD5      | 3.490351471 | 0.954062091 | 0.43487  | 2.193902 | 0.028242 | 0.049155 |
| 1222  | ARMCX3    | 1990.304335 | 0.954041356 | 0.119394 | 7.9907   | 1.34E-15 | 2.15E-14 |
| 2911  | MAPK10    | 247.0066244 | 0.953585608 | 0.156243 | 6.103235 | 1.04E-09 | 7.00E-09 |
| 5787  | OC1001311 | 90.10184729 | 0.953556906 | 0.217768 | 4.378775 | 1.19E-05 | 4.04E-05 |
| 5687  | ADM2      | 799.6974379 | 0.953513039 | 0.215385 | 4.427012 | 9.55E-06 | 3.29E-05 |
| 10095 | VIP       | 9.779665314 | 0.953404019 | 0.364177 | 2.61797  | 0.008845 | 0.017175 |
| 1158  | GFM1      | 1227.017996 | 0.952939154 | 0.117954 | 8.078928 | 6.53E-16 | 1.11E-14 |
| 4306  | ATP6AP2   | 6491.616241 | 0.952814121 | 0.184859 | 5.154265 | 2.55E-07 | 1.16E-06 |
| 7778  | KCNQ1     | 526.8708469 | 0.952667457 | 0.271571 | 3.507989 | 0.000452 | 0.001138 |
| 7321  | SLC26A4   | 28.52169293 | 0.952611214 | 0.258079 | 3.691162 | 0.000223 | 0.000598 |
| 5536  | MYO5C     | 375.7567631 | 0.952506204 | 0.2115   | 4.503572 | 6.68E-06 | 2.37E-05 |
| 14239 | UGT2B28   | 1.011302006 | 0.95163622  | 0.764737 | 1.244397 | 0.213354 | 0.293696 |
| 7327  | CCRL1     | 123.1942076 | 0.95140333  | 0.257903 | 3.688999 | 0.000225 | 0.000602 |
| 2818  | PM20D2    | 597.2070807 | 0.951339228 | 0.154145 | 6.17173  | 6.75E-10 | 4.70E-09 |
| 3292  | PLEKHB2   | 5144.093638 | 0.950891173 | 0.163374 | 5.820342 | 5.87E-09 | 3.50E-08 |
| 3025  | ZNF573    | 27.48628765 | 0.95042276  | 0.157963 | 6.016748 | 1.78E-09 | 1.15E-08 |
| 1655  | ADAL      | 186.290661  | 0.949494777 | 0.129149 | 7.35196  | 1.95E-13 | 2.31E-12 |
| 13088 | C2orf54   | 13.41966116 | 0.949352419 | 0.587621 | 1.615586 | 0.106184 | 0.159024 |
| 2843  | SYNM      | 1153.457242 | 0.949118806 | 0.154343 | 6.149401 | 7.78E-10 | 5.36E-09 |
| 1998  | ZNF253    | 250.852717  | 0.948903716 | 0.136254 | 6.964221 | 3.30E-12 | 3.24E-11 |
| 8536  | ST3GAL6   | 326.0885582 | 0.948805202 | 0.297093 | 3.193634 | 0.001405 | 0.003226 |
| 2441  | UBA5      | 1783.455636 | 0.947969207 | 0.145418 | 6.518949 | 7.08E-11 | 5.69E-10 |
| 7448  | THEM5     | 5.863831752 | 0.947776981 | 0.260528 | 3.637905 | 0.000275 | 0.000723 |
| 3276  | PACSIN2   | 1420.459552 | 0.947688452 | 0.162514 | 5.831435 | 5.50E-09 | 3.29E-08 |
| 11783 | LIPH      | 55.68474849 | 0.946850375 | 0.466898 | 2.027959 | 0.042564 | 0.070806 |

|       |           |             |             |          |          |          |          |
|-------|-----------|-------------|-------------|----------|----------|----------|----------|
| 3866  | SLC30A4   | 123.9139766 | 0.946737873 | 0.174515 | 5.424962 | 5.80E-08 | 2.94E-07 |
| 3741  | CA5B      | 293.940085  | 0.945920364 | 0.171617 | 5.511824 | 3.55E-08 | 1.86E-07 |
| 1038  | ZBTB26    | 83.16125364 | 0.945632975 | 0.114479 | 8.260345 | 1.45E-16 | 2.74E-15 |
| 725   | FASTKD5   | 458.6524624 | 0.945315569 | 0.105631 | 8.949203 | 3.58E-19 | 9.68E-18 |
| 9056  | NYX       | 11.09863128 | 0.944724663 | 0.315401 | 2.995309 | 0.002742 | 0.005934 |
| 3787  | EZR       | 13310.68716 | 0.94390621  | 0.172234 | 5.480368 | 4.24E-08 | 2.20E-07 |
| 821   | FAM179B   | 507.4298884 | 0.943557135 | 0.108373 | 8.706587 | 3.13E-18 | 7.48E-17 |
| 6961  | GCSH      | 39.84987803 | 0.942965663 | 0.245429 | 3.84211  | 0.000122 | 0.000343 |
| 3270  | SHPRH     | 286.5927239 | 0.942913833 | 0.16159  | 5.835215 | 5.37E-09 | 3.22E-08 |
| 4667  | TSGA10    | 47.96285486 | 0.94271321  | 0.190323 | 4.953229 | 7.30E-07 | 3.07E-06 |
| 7819  | MYH15     | 12.78797468 | 0.942673922 | 0.269644 | 3.495993 | 0.000472 | 0.001184 |
| 5419  | HIST2H2BI | 378.7782806 | 0.942535354 | 0.206852 | 4.556574 | 5.20E-06 | 1.88E-05 |
| 5840  | ZNF714    | 127.0669992 | 0.94234312  | 0.216519 | 4.352245 | 1.35E-05 | 4.52E-05 |
| 4290  | PPP1R3E   | 126.3628236 | 0.942288445 | 0.182592 | 5.160621 | 2.46E-07 | 1.12E-06 |
| 9019  | RBM24     | 57.22473943 | 0.942201453 | 0.313532 | 3.005118 | 0.002655 | 0.00577  |
| 1703  | ACBD5     | 1248.571027 | 0.94168386  | 0.129125 | 7.292811 | 3.04E-13 | 3.49E-12 |
| 3131  | SGCB      | 3252.000033 | 0.941544162 | 0.158529 | 5.939262 | 2.86E-09 | 1.79E-08 |
| 949   | SOCS4     | 622.951509  | 0.941531315 | 0.111446 | 8.448317 | 2.96E-17 | 6.10E-16 |
| 587   | DNAJC27   | 204.3152048 | 0.941317996 | 0.100577 | 9.359211 | 8.03E-21 | 2.68E-19 |
| 8717  | CLEC4F    | 10.24591557 | 0.940670967 | 0.301116 | 3.123944 | 0.001784 | 0.004012 |
| 3665  | KLF9      | 3115.769488 | 0.940544676 | 0.169181 | 5.559414 | 2.71E-08 | 1.45E-07 |
| 2194  | CCNC      | 1112.115173 | 0.940405534 | 0.13904  | 6.763553 | 1.35E-11 | 1.20E-10 |
| 2810  | NDFIP2    | 1809.695172 | 0.940253938 | 0.152132 | 6.180525 | 6.39E-10 | 4.46E-09 |
| 7891  | VCAM1     | 11945.00349 | 0.940096655 | 0.272255 | 3.452998 | 0.000554 | 0.001377 |
| 12581 | LOC283856 | 1.916903433 | 0.93992014  | 0.528439 | 1.778673 | 0.075293 | 0.117306 |
| 12003 | PROK1     | 1.06655096  | 0.939813497 | 0.479484 | 1.960052 | 0.04999  | 0.081634 |
| 16538 | PSG2      | 0.717312107 | 0.939576166 | 1.669563 | 0.562768 | 0.573593 | 0.679828 |
| 329   | BBS1      | 1126.133409 | 0.939413856 | 0.090126 | 10.42339 | 1.94E-25 | 1.16E-23 |
| 11272 | C9orf11   | 0.763629669 | 0.939294276 | 0.428833 | 2.190349 | 0.028499 | 0.049557 |
| 773   | PURA      | 515.1109299 | 0.939072461 | 0.106406 | 8.825339 | 1.09E-18 | 2.77E-17 |
| 3478  | CLCN4     | 555.1569012 | 0.938770382 | 0.165051 | 5.687767 | 1.29E-08 | 7.25E-08 |
| 796   | SECISBP2  | 943.6262454 | 0.938463081 | 0.107141 | 8.759154 | 1.97E-18 | 4.84E-17 |
| 10430 | C9orf152  | 2.393558653 | 0.937463522 | 0.374973 | 2.500085 | 0.012416 | 0.023334 |
| 6846  | SLC22A4   | 255.2505068 | 0.937181872 | 0.241484 | 3.880921 | 0.000104 | 0.000298 |
| 2229  | LYSMD3    | 953.5067743 | 0.937066128 | 0.13943  | 6.720692 | 1.81E-11 | 1.59E-10 |
| 2906  | ZNF583    | 78.5084336  | 0.937009733 | 0.153463 | 6.105752 | 1.02E-09 | 6.90E-09 |
| 705   | ZNF181    | 270.3674817 | 0.936976395 | 0.1041   | 9.000697 | 2.24E-19 | 6.24E-18 |
| 15451 | ZIC3      | 0.477676147 | 0.93664488  | 1.071404 | 0.874222 | 0.381997 | 0.484598 |
| 1996  | ZFP30     | 194.8540786 | 0.935966038 | 0.134383 | 6.964891 | 3.29E-12 | 3.23E-11 |
| 4927  | KLHL23    | 158.6446776 | 0.935681944 | 0.19442  | 4.812686 | 1.49E-06 | 5.92E-06 |
| 2450  | CLCN3     | 1623.612593 | 0.935638229 | 0.14367  | 6.512412 | 7.40E-11 | 5.92E-10 |
| 1556  | ZNF664    | 3481.163687 | 0.935020341 | 0.124904 | 7.485894 | 7.11E-14 | 8.95E-13 |
| 2745  | C9orf5    | 2704.685675 | 0.93494854  | 0.149795 | 6.241527 | 4.33E-10 | 3.09E-09 |
| 10055 | PROX1     | 17.06753709 | 0.93492878  | 0.354976 | 2.633781 | 0.008444 | 0.016461 |
| 9417  | PTPRD     | 612.5243179 | 0.934873598 | 0.327793 | 2.852027 | 0.004344 | 0.009042 |
| 10708 | ZYG11A    | 18.41456688 | 0.933797362 | 0.389955 | 2.394632 | 0.016637 | 0.030454 |
| 1719  | NUDT9     | 706.453706  | 0.932711494 | 0.128142 | 7.278759 | 3.37E-13 | 3.84E-12 |

|       |           |             |             |          |          |          |          |
|-------|-----------|-------------|-------------|----------|----------|----------|----------|
| 278   | MOAP1     | 1063.31929  | 0.932506516 | 0.087182 | 10.69609 | 1.06E-26 | 7.48E-25 |
| 1141  | NUBPL     | 273.1487424 | 0.931830424 | 0.114972 | 8.104841 | 5.28E-16 | 9.07E-15 |
| 10382 | ATP2C2    | 21.33832237 | 0.930423555 | 0.370362 | 2.512198 | 0.011998 | 0.022652 |
| 15691 | LOC284798 | 0.258039914 | 0.930370053 | 1.148757 | 0.809893 | 0.418002 | 0.522163 |
| 16576 | HOXB1     | 0.176551942 | 0.930366657 | 1.683148 | 0.552754 | 0.580432 | 0.686357 |
| 16943 | TBX22     | 0.220673386 | 0.930363978 | 2.062627 | 0.451058 | 0.651948 | 0.754225 |
| 17169 | UBE2U     | 0.1507643   | 0.93036064  | 2.359034 | 0.394382 | 0.693299 | 0.791505 |
| 8923  | PGM5P2    | 4.477743941 | 0.93031208  | 0.305729 | 3.042932 | 0.002343 | 0.005147 |
| 4793  | DSC2      | 782.2313126 | 0.929930372 | 0.190178 | 4.889781 | 1.01E-06 | 4.13E-06 |
| 3990  | PRRG1     | 504.8291776 | 0.92808766  | 0.173517 | 5.34868  | 8.86E-08 | 4.35E-07 |
| 2827  | PEX3      | 410.6641694 | 0.928068575 | 0.150521 | 6.1657   | 7.02E-10 | 4.87E-09 |
| 3240  | SCAMP1    | 2105.122892 | 0.927983644 | 0.158345 | 5.860532 | 4.61E-09 | 2.79E-08 |
| 3113  | PPP2R5A   | 1564.105693 | 0.927787828 | 0.155869 | 5.95236  | 2.64E-09 | 1.66E-08 |
| 1986  | DCAF16    | 620.6919842 | 0.927694059 | 0.132827 | 6.984204 | 2.86E-12 | 2.83E-11 |
| 3821  | FYCO1     | 1250.108682 | 0.927402676 | 0.169928 | 5.457609 | 4.83E-08 | 2.48E-07 |
| 2510  | CC2D2A    | 513.549868  | 0.926630303 | 0.143571 | 6.454157 | 1.09E-10 | 8.50E-10 |
| 8057  | RPL23AP64 | 5.634411192 | 0.926485137 | 0.273217 | 3.391026 | 0.000696 | 0.001694 |
| 14443 | CYP1A1    | 4.946442555 | 0.92647293  | 0.782637 | 1.183784 | 0.236499 | 0.320877 |
| 945   | MAPKSP1   | 1141.996299 | 0.926466398 | 0.109578 | 8.454884 | 2.79E-17 | 5.79E-16 |
| 1397  | MIPEP     | 511.224648  | 0.926329231 | 0.119984 | 7.720441 | 1.16E-14 | 1.63E-13 |
| 602   | CGRRF1    | 236.5836453 | 0.926254012 | 0.099513 | 9.307868 | 1.30E-20 | 4.25E-19 |
| 3905  | TUFT1     | 548.5591648 | 0.92623715  | 0.171475 | 5.401585 | 6.61E-08 | 3.32E-07 |
| 758   | UTP14C    | 1093.383455 | 0.926208769 | 0.104454 | 8.867172 | 7.50E-19 | 1.94E-17 |
| 5519  | ZBTB20    | 39.12793403 | 0.926182907 | 0.205259 | 4.512254 | 6.41E-06 | 2.28E-05 |
| 7302  | PFN2      | 2579.370529 | 0.925902616 | 0.250276 | 3.699528 | 0.000216 | 0.00058  |
| 6041  | RAG1      | 91.38434534 | 0.925639753 | 0.217882 | 4.248349 | 2.15E-05 | 6.99E-05 |
| 2352  | SEPSECS   | 613.4905109 | 0.925379209 | 0.1401   | 6.605132 | 3.97E-11 | 3.31E-10 |
| 1878  | 44084     | 1869.112947 | 0.925211789 | 0.130126 | 7.110111 | 1.16E-12 | 1.21E-11 |
| 4188  | SLC12A2   | 783.9219089 | 0.924693379 | 0.177275 | 5.21616  | 1.83E-07 | 8.55E-07 |
| 5270  | WASF3     | 235.36769   | 0.924076848 | 0.199091 | 4.64149  | 3.46E-06 | 1.29E-05 |
| 6864  | TMEM117   | 124.416782  | 0.923582038 | 0.238249 | 3.876546 | 0.000106 | 0.000303 |
| 517   | RANBP6    | 681.8719124 | 0.923483583 | 0.096775 | 9.542631 | 1.39E-21 | 5.28E-20 |
| 2212  | PPP1R15B  | 2247.46197  | 0.923339571 | 0.136907 | 6.744298 | 1.54E-11 | 1.36E-10 |
| 8039  | C2orf73   | 7.677231177 | 0.922962309 | 0.271765 | 3.396182 | 0.000683 | 0.001666 |
| 7489  | PGM5      | 391.4681027 | 0.922716803 | 0.254873 | 3.620302 | 0.000294 | 0.00077  |
| 3991  | SLC25A33  | 110.0265807 | 0.922237206 | 0.172541 | 5.345037 | 9.04E-08 | 4.44E-07 |
| 14739 | PLCZ1     | 0.328250326 | 0.922172394 | 0.848297 | 1.087086 | 0.276999 | 0.368373 |
| 14765 | IGLL1     | 0.385681389 | 0.921376616 | 0.853297 | 1.079785 | 0.280238 | 0.372025 |
| 11597 | NTS       | 14.98958517 | 0.920647377 | 0.442376 | 2.081142 | 0.037421 | 0.063248 |
| 1094  | LIN7C     | 923.5533943 | 0.920480314 | 0.112656 | 8.170736 | 3.07E-16 | 5.49E-15 |
| 3910  | RAB7L1    | 978.5301919 | 0.919445783 | 0.170361 | 5.397045 | 6.77E-08 | 3.40E-07 |
| 807   | ZNF782    | 75.18667077 | 0.91942644  | 0.105235 | 8.736882 | 2.40E-18 | 5.82E-17 |
| 11952 | OMP       | 0.834512036 | 0.919398808 | 0.465663 | 1.974386 | 0.048338 | 0.079273 |
| 783   | ZNF397    | 257.958822  | 0.9193674   | 0.104487 | 8.798891 | 1.38E-18 | 3.46E-17 |
| 2663  | STXBP4    | 246.1706189 | 0.919309252 | 0.145526 | 6.317157 | 2.66E-10 | 1.96E-09 |
| 4554  | ZNF699    | 37.6803003  | 0.919264988 | 0.183568 | 5.007763 | 5.51E-07 | 2.37E-06 |
| 10894 | SLC6A13   | 3488.75005  | 0.919164813 | 0.395839 | 2.322065 | 0.020229 | 0.036394 |

|       |           |             |             |          |          |          |          |
|-------|-----------|-------------|-------------|----------|----------|----------|----------|
| 2802  | LMBRD1    | 2204.900613 | 0.919019309 | 0.14845  | 6.190756 | 5.99E-10 | 4.19E-09 |
| 3175  | FLJ11235  | 57.81464838 | 0.918782459 | 0.155723 | 5.900121 | 3.63E-09 | 2.24E-08 |
| 10463 | TRPA1     | 175.3107074 | 0.917946752 | 0.3689   | 2.488336 | 0.012834 | 0.024043 |
| 3197  | DPP8      | 493.498907  | 0.917877373 | 0.155969 | 5.885001 | 3.98E-09 | 2.44E-08 |
| 348   | WDR20     | 405.8754391 | 0.917836036 | 0.089111 | 10.29997 | 7.05E-25 | 3.97E-23 |
| 1906  | EXOC5     | 1490.865102 | 0.917556147 | 0.129572 | 7.081449 | 1.43E-12 | 1.47E-11 |
| 13655 | GOLGA6A   | 0.661133839 | 0.916917381 | 0.637996 | 1.437184 | 0.150666 | 0.216264 |
| 6095  | FAT4      | 684.6653706 | 0.916531904 | 0.217048 | 4.222706 | 2.41E-05 | 7.76E-05 |
| 13445 | ASTN1     | 10.15828792 | 0.916053313 | 0.609799 | 1.502222 | 0.13304  | 0.193937 |
| 10485 | SOHLH2    | 15.4883147  | 0.915862191 | 0.369711 | 2.477239 | 0.01324  | 0.024752 |
| 1661  | MAPK8     | 223.9125124 | 0.915461255 | 0.12466  | 7.343643 | 2.08E-13 | 2.45E-12 |
| 1389  | EXOC6     | 414.4072584 | 0.915040296 | 0.118403 | 7.728212 | 1.09E-14 | 1.54E-13 |
| 3340  | SVIP      | 403.9801727 | 0.91470675  | 0.157929 | 5.791888 | 6.96E-09 | 4.08E-08 |
| 8736  | AGAP11    | 99.67524915 | 0.914468758 | 0.293624 | 3.114418 | 0.001843 | 0.004135 |
| 3208  | TACC1     | 3929.554076 | 0.91419173  | 0.155476 | 5.879951 | 4.10E-09 | 2.51E-08 |
| 4935  | ZNF431    | 158.9074745 | 0.914028934 | 0.190157 | 4.806715 | 1.53E-06 | 6.09E-06 |
| 5260  | VAV3      | 1713.131635 | 0.913958376 | 0.196725 | 4.645873 | 3.39E-06 | 1.26E-05 |
| 2253  | FARP2     | 250.6068508 | 0.913669624 | 0.136497 | 6.693701 | 2.18E-11 | 1.89E-10 |
| 9888  | ESYT3     | 16.1207559  | 0.912952895 | 0.339246 | 2.691125 | 0.007121 | 0.014116 |
| 5532  | SLC2A13   | 792.9397631 | 0.912671259 | 0.202601 | 4.504767 | 6.64E-06 | 2.35E-05 |
| 6942  | LOC91316  | 445.6014393 | 0.912045501 | 0.237038 | 3.847678 | 0.000119 | 0.000337 |
| 10220 | ZNF727    | 12.222741   | 0.911755739 | 0.354184 | 2.574241 | 0.010046 | 0.019267 |
| 2559  | SAV1      | 823.6327824 | 0.911485305 | 0.142037 | 6.41725  | 1.39E-10 | 1.06E-09 |
| 10432 | TRIM15    | 178.8158763 | 0.91146988  | 0.36464  | 2.49964  | 0.012432 | 0.023359 |
| 4756  | PPAP2A    | 3485.183344 | 0.910918096 | 0.185656 | 4.906488 | 9.27E-07 | 3.82E-06 |
| 5036  | ZNF540    | 87.05989054 | 0.910746552 | 0.191535 | 4.754995 | 1.98E-06 | 7.72E-06 |
| 3837  | C3orf59   | 265.6723658 | 0.910341862 | 0.167289 | 5.441743 | 5.28E-08 | 2.69E-07 |
| 2849  | HMBOX1    | 106.8468744 | 0.910232425 | 0.148154 | 6.143808 | 8.06E-10 | 5.54E-09 |
| 5756  | EAF2      | 105.2652357 | 0.909881422 | 0.207123 | 4.392953 | 1.12E-05 | 3.81E-05 |
| 2378  | TMEM135   | 978.4358851 | 0.909186282 | 0.138159 | 6.580738 | 4.68E-11 | 3.86E-10 |
| 7087  | RAB3A     | 107.5868799 | 0.908569173 | 0.23975  | 3.789659 | 0.000151 | 0.000417 |
| 2473  | ZNF441    | 239.4264601 | 0.908186536 | 0.139794 | 6.496585 | 8.22E-11 | 6.51E-10 |
| 8753  | ALDH4A1   | 2167.48882  | 0.908035422 | 0.292419 | 3.105257 | 0.001901 | 0.004257 |
| 10846 | LOC284100 | 10.25097004 | 0.907755605 | 0.387657 | 2.341649 | 0.019199 | 0.034696 |
| 9218  | SNCA      | 142.6367144 | 0.907430199 | 0.309401 | 2.932864 | 0.003359 | 0.007142 |
| 1862  | ZNF718    | 85.38035937 | 0.907155025 | 0.12733  | 7.124446 | 1.05E-12 | 1.10E-11 |
| 5838  | A2LD1     | 154.1192514 | 0.906855556 | 0.208328 | 4.353024 | 1.34E-05 | 4.51E-05 |
| 1320  | TAB3      | 911.9785632 | 0.906564318 | 0.115691 | 7.83608  | 4.65E-15 | 6.90E-14 |
| 2017  | FBXL3     | 1471.635258 | 0.906246827 | 0.130575 | 6.940416 | 3.91E-12 | 3.80E-11 |
| 4205  | EDA       | 214.9297428 | 0.906169657 | 0.174089 | 5.205216 | 1.94E-07 | 9.03E-07 |
| 2266  | CHM       | 798.0449565 | 0.905317304 | 0.135418 | 6.685348 | 2.30E-11 | 1.99E-10 |
| 10753 | SPTBN4    | 64.97353337 | 0.904994143 | 0.38026  | 2.379934 | 0.017316 | 0.031564 |
| 1367  | SNX4      | 1077.563555 | 0.904259742 | 0.116395 | 7.768891 | 7.92E-15 | 1.14E-13 |
| 9194  | FBXL16    | 790.8126218 | 0.903585735 | 0.307154 | 2.941805 | 0.003263 | 0.006957 |
| 1569  | CLN5      | 1249.305358 | 0.90309935  | 0.120895 | 7.470089 | 8.01E-14 | 1.00E-12 |
| 5746  | SORBS2    | 1634.463397 | 0.902965785 | 0.205244 | 4.399471 | 1.09E-05 | 3.70E-05 |
| 1053  | C1orf25   | 779.4544931 | 0.902636321 | 0.109567 | 8.238217 | 1.75E-16 | 3.25E-15 |

|       |          |             |             |          |          |          |          |
|-------|----------|-------------|-------------|----------|----------|----------|----------|
| 5899  | MREG     | 165.2157741 | 0.902562971 | 0.208865 | 4.32127  | 1.55E-05 | 5.15E-05 |
| 2792  | RIT1     | 1539.889311 | 0.901925101 | 0.145488 | 6.199288 | 5.67E-10 | 3.98E-09 |
| 5902  | PCLO     | 315.7822843 | 0.901481277 | 0.208652 | 4.320496 | 1.56E-05 | 5.17E-05 |
| 3297  | RARB     | 338.3706477 | 0.90105157  | 0.154879 | 5.817772 | 5.96E-09 | 3.55E-08 |
| 3921  | RBBP8    | 1198.504589 | 0.900617292 | 0.167078 | 5.3904   | 7.03E-08 | 3.51E-07 |
| 7736  | NRG3     | 118.0328086 | 0.900023458 | 0.255431 | 3.523546 | 0.000426 | 0.001079 |
| 7155  | SGALNAC  | 754.6049684 | 0.899857134 | 0.239176 | 3.762325 | 0.000168 | 0.000461 |
| 2200  | SH3D19   | 1179.57776  | 0.899480177 | 0.133138 | 6.755984 | 1.42E-11 | 1.26E-10 |
| 5408  | SLC25A40 | 230.1777044 | 0.899370563 | 0.19721  | 4.560461 | 5.10E-06 | 1.85E-05 |
| 3874  | ERBB2    | 2526.964145 | 0.89891675  | 0.165827 | 5.420817 | 5.93E-08 | 3.00E-07 |
| 6970  | RAB17    | 965.0223331 | 0.898849499 | 0.234069 | 3.840109 | 0.000123 | 0.000346 |
| 9883  | RNF150   | 77.38340094 | 0.898720329 | 0.333687 | 2.693303 | 0.007075 | 0.014031 |
| 2934  | SPIRE1   | 2039.691992 | 0.89868131  | 0.147789 | 6.080833 | 1.20E-09 | 7.99E-09 |
| 3848  | CCDC87   | 19.90758433 | 0.898572793 | 0.165345 | 5.434533 | 5.49E-08 | 2.80E-07 |
| 4992  | DNAJB4   | 800.7258922 | 0.898250241 | 0.188003 | 4.777838 | 1.77E-06 | 6.96E-06 |
| 1450  | ARID4A   | 623.8917535 | 0.89823502  | 0.117645 | 7.635114 | 2.26E-14 | 3.05E-13 |
| 12798 | AMAC1L3  | 0.420891555 | 0.8975521   | 0.526638 | 1.704307 | 0.088324 | 0.135274 |
| 1159  | ZNF223   | 92.47683771 | 0.897312968 | 0.111087 | 8.077546 | 6.61E-16 | 1.12E-14 |
| 6006  | LONRF3   | 70.2694282  | 0.897134669 | 0.210375 | 4.264447 | 2.00E-05 | 6.54E-05 |
| 2584  | PCGF5    | 2326.435249 | 0.896975922 | 0.140229 | 6.396509 | 1.59E-10 | 1.21E-09 |
| 4275  | COQ3     | 129.1060979 | 0.896953317 | 0.173539 | 5.168603 | 2.36E-07 | 1.08E-06 |
| 1200  | ZBTB44   | 2067.384141 | 0.896198763 | 0.111823 | 8.014429 | 1.11E-15 | 1.81E-14 |
| 5792  | GRTP1    | 150.1487524 | 0.896187885 | 0.204745 | 4.377101 | 1.20E-05 | 4.07E-05 |
| 8468  | TFEC     | 1028.529598 | 0.895919929 | 0.278248 | 3.219866 | 0.001283 | 0.002969 |
| 12669 | CTXN2    | 2.370187878 | 0.895346894 | 0.512236 | 1.74792  | 0.080478 | 0.124512 |
| 7957  | ABTB2    | 393.2476189 | 0.895112966 | 0.261408 | 3.424205 | 0.000617 | 0.001519 |
| 7144  | MAN2A1   | 1275.285475 | 0.894995352 | 0.237672 | 3.765668 | 0.000166 | 0.000456 |
| 5410  | SPATA13  | 563.631063  | 0.89446575  | 0.196156 | 4.559976 | 5.12E-06 | 1.85E-05 |
| 1296  | TSC1     | 979.5434357 | 0.894444307 | 0.113635 | 7.871189 | 3.51E-15 | 5.31E-14 |
| 9282  | CD207    | 14.84576091 | 0.894417237 | 0.30778  | 2.90603  | 0.00366  | 0.00773  |
| 6078  | LDB2     | 1256.848026 | 0.894290614 | 0.211417 | 4.229978 | 2.34E-05 | 7.54E-05 |
| 1409  | MTM1     | 399.5394062 | 0.894026031 | 0.116281 | 7.688506 | 1.49E-14 | 2.07E-13 |
| 3421  | ATP7A    | 664.3550283 | 0.893897093 | 0.156065 | 5.727713 | 1.02E-08 | 5.83E-08 |
| 4752  | DDR1     | 3751.471505 | 0.893694243 | 0.182099 | 4.907748 | 9.21E-07 | 3.80E-06 |
| 1467  | GCLC     | 884.5014781 | 0.893563812 | 0.117321 | 7.616374 | 2.61E-14 | 3.49E-13 |
| 7165  | GPR157   | 21.43631929 | 0.893245842 | 0.237734 | 3.757328 | 0.000172 | 0.00047  |
| 8976  | DSP      | 2796.076815 | 0.893132773 | 0.295595 | 3.021478 | 0.002515 | 0.005493 |
| 6905  | BANK1    | 165.403198  | 0.893051672 | 0.23123  | 3.862185 | 0.000112 | 0.000319 |
| 14460 | KLK2     | 2.130447866 | 0.892813624 | 0.756911 | 1.179548 | 0.23818  | 0.322876 |
| 7812  | WDR65    | 4.904547177 | 0.892437314 | 0.255193 | 3.497107 | 0.00047  | 0.00118  |
| 6065  | CTSF     | 1700.825016 | 0.891823781 | 0.210443 | 4.237838 | 2.26E-05 | 7.29E-05 |
| 1379  | C16orf52 | 399.5913014 | 0.891815317 | 0.114991 | 7.755513 | 8.80E-15 | 1.25E-13 |
| 9602  | C6orf138 | 108.8020841 | 0.890839755 | 0.320511 | 2.779438 | 0.005445 | 0.011115 |
| 6015  | RAD54L2  | 158.9513392 | 0.890579848 | 0.209185 | 4.257387 | 2.07E-05 | 6.74E-05 |
| 9716  | GRM8     | 141.0046866 | 0.890177113 | 0.324502 | 2.743213 | 0.006084 | 0.012274 |
| 1538  | SLC12A6  | 798.5453449 | 0.889725148 | 0.118506 | 7.507828 | 6.01E-14 | 7.66E-13 |
| 1166  | ALDH9A1  | 2720.044626 | 0.889347183 | 0.110233 | 8.06785  | 7.15E-16 | 1.20E-14 |

|       |           |             |             |          |          |          |          |
|-------|-----------|-------------|-------------|----------|----------|----------|----------|
| 5097  | ARHGAP4   | 757.8627409 | 0.889345883 | 0.188093 | 4.728229 | 2.26E-06 | 8.71E-06 |
| 4063  | DAAM1     | 229.1059829 | 0.889111772 | 0.167781 | 5.299244 | 1.16E-07 | 5.61E-07 |
| 8387  | SLC6A12   | 1234.6251   | 0.888599315 | 0.272947 | 3.255579 | 0.001132 | 0.002645 |
| 2265  | ALS2CR8   | 180.7331755 | 0.888345315 | 0.132871 | 6.685786 | 2.30E-11 | 1.99E-10 |
| 117   | NUMB      | 2097.913045 | 0.888303809 | 0.073478 | 12.08939 | 1.20E-33 | 2.01E-31 |
| 9479  | FAM106C   | 7.599978386 | 0.887631629 | 0.314114 | 2.82583  | 0.004716 | 0.009752 |
| 2689  | ZNF649    | 183.1502661 | 0.887409341 | 0.141045 | 6.291666 | 3.14E-10 | 2.29E-09 |
| 3272  | CBX7      | 1779.740594 | 0.886000632 | 0.151868 | 5.834005 | 5.41E-09 | 3.24E-08 |
| 1045  | PREPL     | 2412.716665 | 0.885898069 | 0.107456 | 8.244255 | 1.66E-16 | 3.12E-15 |
| 1083  | RNF38     | 1183.317562 | 0.885773216 | 0.108224 | 8.184608 | 2.73E-16 | 4.94E-15 |
| 2415  | MBIP      | 325.8299333 | 0.88575712  | 0.135343 | 6.544547 | 5.97E-11 | 4.84E-10 |
| 15450 | RHOXF2B   | 0.441340312 | 0.88530673  | 1.012675 | 0.874226 | 0.381995 | 0.484598 |
| 10782 | DOCK3     | 24.42187127 | 0.885151146 | 0.373976 | 2.366866 | 0.017939 | 0.03261  |
| 6295  | LOC646471 | 89.3311749  | 0.885121368 | 0.214356 | 4.12922  | 3.64E-05 | 0.000113 |
| 3867  | PDHA1     | 2161.079594 | 0.884396184 | 0.163084 | 5.422963 | 5.86E-08 | 2.97E-07 |
| 1011  | ZNF260    | 553.9580512 | 0.884211335 | 0.106237 | 8.323014 | 8.58E-17 | 1.66E-15 |
| 1507  | SIK2      | 1213.918211 | 0.884187499 | 0.117021 | 7.555779 | 4.16E-14 | 5.42E-13 |
| 1461  | MMAA      | 447.657651  | 0.884031129 | 0.115948 | 7.624363 | 2.45E-14 | 3.29E-13 |
| 10659 | TEDDM1    | 1.973129298 | 0.883999334 | 0.367027 | 2.408542 | 0.016016 | 0.029453 |
| 12341 | TCEB3B    | 0.74752543  | 0.883183699 | 0.477054 | 1.851329 | 0.064122 | 0.101844 |
| 4548  | TMEM106F  | 2722.064348 | 0.883075739 | 0.176254 | 5.010241 | 5.44E-07 | 2.34E-06 |
| 3389  | ISCU      | 2477.908415 | 0.882958257 | 0.153414 | 5.755394 | 8.64E-09 | 5.00E-08 |
| 1972  | PRDX3     | 4135.987199 | 0.881916224 | 0.125991 | 6.999811 | 2.56E-12 | 2.55E-11 |
| 1250  | TSPYL4    | 749.2722493 | 0.881800852 | 0.111172 | 7.931831 | 2.16E-15 | 3.39E-14 |
| 1144  | TAPT1     | 762.0703396 | 0.881777747 | 0.108903 | 8.096885 | 5.64E-16 | 9.66E-15 |
| 2305  | ZNRF2     | 738.4658159 | 0.881359778 | 0.132553 | 6.649117 | 2.95E-11 | 2.51E-10 |
| 2673  | DHRS4     | 951.6610089 | 0.881143864 | 0.139709 | 6.306972 | 2.85E-10 | 2.09E-09 |
| 599   | ZNF24     | 1921.270763 | 0.881064489 | 0.094562 | 9.317354 | 1.19E-20 | 3.90E-19 |
| 1684  | ISOC1     | 587.743741  | 0.881059801 | 0.120404 | 7.31751  | 2.53E-13 | 2.94E-12 |
| 7082  | NORD116L  | 11.7920657  | 0.880645381 | 0.232303 | 3.790939 | 0.00015  | 0.000415 |
| 4233  | ZNF192    | 441.6118767 | 0.880033384 | 0.16948  | 5.19255  | 2.07E-07 | 9.61E-07 |
| 10170 | SCUBE2    | 103.1466607 | 0.879956099 | 0.339327 | 2.593238 | 0.009508 | 0.018325 |
| 9272  | FAM13C    | 281.2532811 | 0.879148527 | 0.302273 | 2.908454 | 0.003632 | 0.007678 |
| 1196  | DCTN6     | 705.3280616 | 0.879109541 | 0.109628 | 8.018992 | 1.07E-15 | 1.75E-14 |
| 3618  | TMEM55A   | 429.4178774 | 0.878848933 | 0.157102 | 5.594129 | 2.22E-08 | 1.20E-07 |
| 3599  | SUGT1L1   | 29.42019913 | 0.878683859 | 0.156747 | 5.605751 | 2.07E-08 | 1.13E-07 |
| 9006  | UCKL1AS   | 19.65624731 | 0.877924278 | 0.291754 | 3.00912  | 0.00262  | 0.005702 |
| 4213  | RASSF8    | 720.5020286 | 0.877745131 | 0.168729 | 5.202115 | 1.97E-07 | 9.17E-07 |
| 10480 | AQP7P1    | 8.835360397 | 0.877727115 | 0.354025 | 2.479283 | 0.013165 | 0.024622 |
| 5199  | TMTC2     | 508.0406586 | 0.8773622   | 0.187551 | 4.677987 | 2.90E-06 | 1.09E-05 |
| 14008 | HTR4      | 1.025780012 | 0.877352471 | 0.666685 | 1.315993 | 0.188176 | 0.2633   |
| 3781  | CRYL1     | 2883.767323 | 0.877268084 | 0.159918 | 5.48573  | 4.12E-08 | 2.13E-07 |
| 2875  | HADH      | 1246.175862 | 0.877172846 | 0.143201 | 6.125475 | 9.04E-10 | 6.16E-09 |
| 11485 | CSMD1     | 30.07636708 | 0.877145251 | 0.412569 | 2.126057 | 0.033498 | 0.057171 |
| 12329 | NAPSA     | 539.6328401 | 0.87649854  | 0.472335 | 1.855673 | 0.0635   | 0.100954 |
| 4023  | EPB49     | 1515.567853 | 0.875905361 | 0.164427 | 5.327027 | 9.98E-08 | 4.86E-07 |
| 2529  | ZNF708    | 158.3107761 | 0.875876634 | 0.136017 | 6.439475 | 1.20E-10 | 9.29E-10 |



|       |           |             |             |          |          |          |          |
|-------|-----------|-------------|-------------|----------|----------|----------|----------|
| 4198  | PTPRG     | 1475.148783 | 0.875808609 | 0.168042 | 5.21185  | 1.87E-07 | 8.73E-07 |
| 906   | C14orf104 | 221.0114466 | 0.875411521 | 0.102865 | 8.51028  | 1.74E-17 | 3.75E-16 |
| 9644  | FGF17     | 3.154375188 | 0.874837195 | 0.316437 | 2.764645 | 0.005698 | 0.011582 |
| 1549  | IREB2     | 1407.320124 | 0.874488627 | 0.116718 | 7.492297 | 6.77E-14 | 8.56E-13 |
| 4747  | FAM175A   | 369.0623066 | 0.873777933 | 0.177966 | 4.909802 | 9.12E-07 | 3.76E-06 |
| 871   | STX17     | 863.502238  | 0.873516289 | 0.101601 | 8.597531 | 8.14E-18 | 1.83E-16 |
| 5251  | FGD4      | 1338.881453 | 0.873368304 | 0.187802 | 4.650478 | 3.31E-06 | 1.24E-05 |
| 1596  | ZCCHC14   | 1076.40462  | 0.873239865 | 0.117581 | 7.426698 | 1.11E-13 | 1.37E-12 |
| 15248 | TRIM40    | 0.299359491 | 0.872663281 | 0.934942 | 0.933388 | 0.35062  | 0.450715 |
| 16348 | OC1001924 | 0.231983129 | 0.872660901 | 1.419277 | 0.614863 | 0.538645 | 0.645827 |
| 17065 | RBP3      | 0.20402651  | 0.872656264 | 2.066815 | 0.422223 | 0.672862 | 0.772855 |
| 17075 | PFN3      | 0.177860308 | 0.872656026 | 2.080259 | 0.419494 | 0.674855 | 0.77469  |
| 17083 | C2orf14   | 0.152198729 | 0.872655645 | 2.095118 | 0.416519 | 0.67703  | 0.776823 |
| 17266 | GSTA3     | 0.165282362 | 0.872653592 | 2.331156 | 0.374344 | 0.708149 | 0.803799 |
| 1583  | PCNX      | 1474.654546 | 0.872634425 | 0.117241 | 7.443069 | 9.84E-14 | 1.22E-12 |
| 11433 | NECAB2    | 86.7323009  | 0.872406974 | 0.407848 | 2.139048 | 0.032432 | 0.055602 |
| 9358  | TRPC3     | 7.652883429 | 0.871751054 | 0.303008 | 2.876993 | 0.004015 | 0.008409 |
| 2412  | ATP6V1C1  | 2536.840398 | 0.871362731 | 0.133099 | 6.546727 | 5.88E-11 | 4.78E-10 |
| 8278  | SPAG5     | 520.5259536 | 0.87134657  | 0.263941 | 3.301291 | 0.000962 | 0.002279 |
| 2170  | ZNF709    | 99.16001573 | 0.871101736 | 0.128236 | 6.792935 | 1.10E-11 | 9.92E-11 |
| 12218 | GALNT9    | 184.2756598 | 0.870941247 | 0.460523 | 1.891199 | 0.058598 | 0.093999 |
| 2907  | THAP9     | 155.8768628 | 0.870699536 | 0.142609 | 6.105503 | 1.02E-09 | 6.91E-09 |
| 3940  | GPAM      | 324.7212703 | 0.870524879 | 0.161831 | 5.379223 | 7.48E-08 | 3.72E-07 |
| 6154  | ZNF418    | 72.01866267 | 0.870497384 | 0.20721  | 4.201034 | 2.66E-05 | 8.46E-05 |
| 1743  | USP38     | 877.2901515 | 0.870434318 | 0.120033 | 7.251654 | 4.12E-13 | 4.63E-12 |
| 10611 | ADCYAP1   | 21.91454437 | 0.870398422 | 0.357746 | 2.433008 | 0.014974 | 0.02766  |
| 11903 | TMC5      | 20.19731044 | 0.869699936 | 0.437719 | 1.98689  | 0.046935 | 0.077288 |
| 5651  | ZNF610    | 70.38871008 | 0.869304042 | 0.195496 | 4.446651 | 8.72E-06 | 3.03E-05 |
| 8883  | LOC349114 | 153.5708745 | 0.869303871 | 0.28421  | 3.058666 | 0.002223 | 0.004906 |
| 13357 | ZIM2      | 0.538657834 | 0.86926165  | 0.570076 | 1.524818 | 0.127304 | 0.186815 |
| 4497  | MPDZ      | 902.8053932 | 0.86920901  | 0.172449 | 5.040383 | 4.65E-07 | 2.03E-06 |
| 2967  | MAP4K3    | 820.9979444 | 0.869207706 | 0.143498 | 6.057296 | 1.38E-09 | 9.15E-09 |
| 8372  | HOXB8     | 145.757874  | 0.86882563  | 0.26639  | 3.261479 | 0.001108 | 0.002595 |
| 1078  | SIRT5     | 448.2811242 | 0.868619981 | 0.105992 | 8.195129 | 2.50E-16 | 4.55E-15 |
| 2904  | NFAT5     | 2326.65184  | 0.868346909 | 0.142145 | 6.108898 | 1.00E-09 | 6.77E-09 |
| 4403  | PIK3R3    | 1755.023659 | 0.867997927 | 0.170133 | 5.101876 | 3.36E-07 | 1.50E-06 |
| 16028 | RDH8      | 1.06943079  | 0.867881144 | 1.234986 | 0.702746 | 0.482214 | 0.589729 |
| 5789  | ZNF793    | 101.52942   | 0.867716643 | 0.198163 | 4.378797 | 1.19E-05 | 4.04E-05 |
| 2069  | TRAPPC6E  | 708.9677944 | 0.86765529  | 0.126101 | 6.880639 | 5.96E-12 | 5.64E-11 |
| 5860  | NOSTRIN   | 681.8588104 | 0.867474404 | 0.199827 | 4.341136 | 1.42E-05 | 4.74E-05 |
| 1201  | ATL2      | 997.9984794 | 0.867438148 | 0.108253 | 8.01309  | 1.12E-15 | 1.83E-14 |
| 1988  | ARHGAP32  | 769.3581755 | 0.867388295 | 0.124303 | 6.978036 | 2.99E-12 | 2.95E-11 |
| 1964  | AP4S1     | 84.13758919 | 0.86726189  | 0.123654 | 7.013639 | 2.32E-12 | 2.32E-11 |
| 2751  | DMXL1     | 1560.809907 | 0.866588355 | 0.138898 | 6.239021 | 4.40E-10 | 3.14E-09 |
| 1177  | ZNF555    | 87.69491522 | 0.866234455 | 0.107552 | 8.054075 | 8.01E-16 | 1.33E-14 |
| 2367  | ZNF620    | 41.78546163 | 0.865895629 | 0.13136  | 6.59178  | 4.35E-11 | 3.60E-10 |
| 686   | SNAPC3    | 593.9292913 | 0.865738506 | 0.095702 | 9.04615  | 1.48E-19 | 4.23E-18 |

|       |           |             |             |          |          |          |          |
|-------|-----------|-------------|-------------|----------|----------|----------|----------|
| 10843 | MST1P9    | 165.1931944 | 0.865691138 | 0.369453 | 2.343169 | 0.019121 | 0.034565 |
| 1548  | LOC653501 | 148.4145291 | 0.865427982 | 0.115497 | 7.493047 | 6.73E-14 | 8.52E-13 |
| 6301  | ACER2     | 92.77024499 | 0.865416768 | 0.20973  | 4.126347 | 3.69E-05 | 0.000115 |
| 4082  | C1orf192  | 27.51695967 | 0.865151094 | 0.163536 | 5.290271 | 1.22E-07 | 5.86E-07 |
| 5505  | ARL5B     | 299.3356513 | 0.865132201 | 0.191532 | 4.516914 | 6.27E-06 | 2.23E-05 |
| 597   | TOPORS    | 574.7976156 | 0.864908541 | 0.092715 | 9.32864  | 1.07E-20 | 3.52E-19 |
| 3142  | KLHL24    | 1865.711629 | 0.864817151 | 0.145824 | 5.930563 | 3.02E-09 | 1.88E-08 |
| 11486 | HPSE2     | 1.968932198 | 0.863919079 | 0.406414 | 2.125714 | 0.033527 | 0.057214 |
| 4662  | LRP11     | 995.2410627 | 0.863858834 | 0.17435  | 4.954733 | 7.24E-07 | 3.05E-06 |
| 9454  | BTNL8     | 5.801135071 | 0.863796519 | 0.30455  | 2.836302 | 0.004564 | 0.009462 |
| 812   | KIAA1826  | 439.5340366 | 0.862813434 | 0.098859 | 8.727759 | 2.60E-18 | 6.27E-17 |
| 5584  | SATB1     | 564.7081002 | 0.862683611 | 0.192513 | 4.481175 | 7.42E-06 | 2.61E-05 |
| 2117  | UBR3      | 1301.559818 | 0.861246366 | 0.126076 | 6.831175 | 8.42E-12 | 7.80E-11 |
| 4741  | PTCH1     | 320.9902999 | 0.86123538  | 0.175287 | 4.913295 | 8.96E-07 | 3.70E-06 |
| 7405  | PRKCD     | 1110.521727 | 0.861188202 | 0.235618 | 3.655018 | 0.000257 | 0.000681 |
| 13057 | UGT3A1    | 741.2508244 | 0.860306236 | 0.528636 | 1.627408 | 0.10365  | 0.155599 |
| 6828  | OC1002722 | 29.83540942 | 0.860155036 | 0.221197 | 3.888636 | 0.000101 | 0.000289 |
| 434   | HDHD2     | 770.7498699 | 0.859995112 | 0.087065 | 9.877641 | 5.20E-23 | 2.35E-21 |
| 1877  | OPHN1     | 164.6591299 | 0.859361104 | 0.120863 | 7.110229 | 1.16E-12 | 1.21E-11 |
| 1891  | IKZF5     | 533.1141712 | 0.859289124 | 0.121162 | 7.092087 | 1.32E-12 | 1.37E-11 |
| 5819  | CEP152    | 118.1990074 | 0.858833467 | 0.196809 | 4.363788 | 1.28E-05 | 4.31E-05 |
| 2675  | SNRK      | 2229.621291 | 0.858644987 | 0.136238 | 6.302556 | 2.93E-10 | 2.15E-09 |
| 7488  | HOXA7     | 280.6764469 | 0.858382433 | 0.237077 | 3.620694 | 0.000294 | 0.000769 |
| 6619  | CYYR1     | 1066.290205 | 0.858167032 | 0.215804 | 3.976601 | 6.99E-05 | 0.000207 |
| 826   | MEM170A   | 679.4978895 | 0.858147025 | 0.098709 | 8.693698 | 3.51E-18 | 8.33E-17 |
| 1929  | WWC2      | 1247.116985 | 0.857791984 | 0.121553 | 7.05692  | 1.70E-12 | 1.73E-11 |
| 3808  | AGPAT5    | 1387.191724 | 0.857704434 | 0.156871 | 5.467577 | 4.56E-08 | 2.35E-07 |
| 9901  | FAM23A    | 14.35964886 | 0.85605722  | 0.318537 | 2.687462 | 0.0072   | 0.014253 |
| 833   | ZFYVE9    | 611.660309  | 0.856054795 | 0.098713 | 8.672166 | 4.24E-18 | 9.98E-17 |
| 1653  | KIF3A     | 427.5727149 | 0.855995934 | 0.116385 | 7.354877 | 1.91E-13 | 2.27E-12 |
| 8669  | CRNA0008  | 350.6965854 | 0.855819027 | 0.272154 | 3.144615 | 0.001663 | 0.00376  |
| 7631  | SLC35F1   | 64.79543281 | 0.855099592 | 0.239716 | 3.567143 | 0.000361 | 0.000927 |
| 4121  | C9orf103  | 153.6088988 | 0.854844095 | 0.162218 | 5.269739 | 1.37E-07 | 6.50E-07 |
| 4719  | SLC25A25  | 470.1420956 | 0.854831673 | 0.173627 | 4.923392 | 8.51E-07 | 3.53E-06 |
| 5037  | ZNF829    | 14.97127036 | 0.85466249  | 0.179739 | 4.755032 | 1.98E-06 | 7.72E-06 |
| 2286  | HOXB2     | 412.9323401 | 0.854153336 | 0.128111 | 6.667269 | 2.61E-11 | 2.23E-10 |
| 1936  | KIAA2026  | 746.8649306 | 0.854102133 | 0.121218 | 7.046013 | 1.84E-12 | 1.86E-11 |
| 8050  | SESN3     | 162.2832215 | 0.853970528 | 0.251746 | 3.392195 | 0.000693 | 0.001688 |
| 4383  | AASS      | 441.8073419 | 0.853911728 | 0.167001 | 5.113228 | 3.17E-07 | 1.42E-06 |
| 11492 | FBXO2     | 147.5667551 | 0.853756474 | 0.402193 | 2.122755 | 0.033774 | 0.057606 |
| 6088  | NKRD36B1  | 159.332864  | 0.852989855 | 0.201811 | 4.226683 | 2.37E-05 | 7.64E-05 |
| 9193  | LOC440905 | 20.14666102 | 0.852266518 | 0.289704 | 2.941848 | 0.003263 | 0.006956 |
| 12262 | MMP21     | 1.096892958 | 0.852198082 | 0.453597 | 1.878754 | 0.060278 | 0.096355 |
| 2390  | COX11     | 1141.14795  | 0.852098961 | 0.129712 | 6.569155 | 5.06E-11 | 4.15E-10 |
| 5504  | MAP3K13   | 120.4502503 | 0.852027656 | 0.188589 | 4.517916 | 6.25E-06 | 2.22E-05 |
| 5987  | ASXL2     | 740.0802287 | 0.851858809 | 0.199278 | 4.274736 | 1.91E-05 | 6.27E-05 |
| 3703  | ACAD10    | 885.5177251 | 0.851844872 | 0.153932 | 5.533888 | 3.13E-08 | 1.66E-07 |

|       |           |             |             |          |          |          |          |
|-------|-----------|-------------|-------------|----------|----------|----------|----------|
| 1300  | CLASP2    | 896.6690017 | 0.851804387 | 0.108298 | 7.865355 | 3.68E-15 | 5.55E-14 |
| 3656  | TRAK1     | 1423.91612  | 0.85171612  | 0.153016 | 5.566203 | 2.60E-08 | 1.40E-07 |
| 2361  | ZNF420    | 142.7348018 | 0.851442218 | 0.129055 | 6.597498 | 4.18E-11 | 3.47E-10 |
| 5366  | KLF10     | 3066.777414 | 0.851256703 | 0.185689 | 4.584315 | 4.55E-06 | 1.66E-05 |
| 2563  | GAB1      | 717.5180691 | 0.850690619 | 0.132619 | 6.414522 | 1.41E-10 | 1.08E-09 |
| 3143  | KCTD6     | 176.0451635 | 0.850448914 | 0.143448 | 5.928601 | 3.06E-09 | 1.91E-08 |
| 11975 | PCDHA12   | 31.23404358 | 0.849948431 | 0.432245 | 1.966358 | 0.049257 | 0.080626 |
| 8186  | LRRC4     | 111.1278116 | 0.849387736 | 0.254381 | 3.339036 | 0.000841 | 0.002013 |
| 1768  | GNE       | 974.6212486 | 0.849344334 | 0.117595 | 7.222605 | 5.10E-13 | 5.65E-12 |
| 2725  | BBX       | 1872.382884 | 0.849288351 | 0.135673 | 6.25982  | 3.85E-10 | 2.77E-09 |
| 9082  | RASEF     | 128.4490404 | 0.849217759 | 0.284427 | 2.985718 | 0.002829 | 0.006106 |
| 1017  | PCMTD2    | 1642.089993 | 0.84834412  | 0.102106 | 8.308451 | 9.70E-17 | 1.87E-15 |
| 12885 | SLC6A3    | 2849.540989 | 0.848038104 | 0.505356 | 1.6781   | 0.093328 | 0.141972 |
| 1676  | TRAK2     | 1839.204816 | 0.84740119  | 0.115635 | 7.328248 | 2.33E-13 | 2.73E-12 |
| 6204  | VN1R1     | 14.63675369 | 0.847381656 | 0.202985 | 4.174606 | 2.99E-05 | 9.43E-05 |
| 2964  | TPMT      | 1479.793287 | 0.847314077 | 0.139853 | 6.0586   | 1.37E-09 | 9.08E-09 |
| 10455 | LOC285419 | 6.761137972 | 0.847042057 | 0.340121 | 2.490412 | 0.01276  | 0.023922 |
| 6405  | EVI5L     | 430.2496609 | 0.846896558 | 0.207829 | 4.07496  | 4.60E-05 | 0.000141 |
| 9258  | PNMA6A    | 409.6898251 | 0.84676877  | 0.290628 | 2.913586 | 0.003573 | 0.007565 |
| 1312  | C5orf44   | 577.7576717 | 0.846454865 | 0.107888 | 7.845685 | 4.31E-15 | 6.43E-14 |
| 7675  | PAR3B     | 82.78855776 | 0.845797917 | 0.238335 | 3.548773 | 0.000387 | 0.000988 |
| 3159  | FAM82A1   | 135.1811528 | 0.845749475 | 0.143053 | 5.912143 | 3.38E-09 | 2.10E-08 |
| 1526  | ZFP3      | 251.9648058 | 0.845636287 | 0.112453 | 7.519903 | 5.48E-14 | 7.04E-13 |
| 541   | ZNF776    | 440.5760371 | 0.84535218  | 0.089066 | 9.491323 | 2.28E-21 | 8.27E-20 |
| 10073 | KLF15     | 454.4174823 | 0.845341639 | 0.32176  | 2.627244 | 0.008608 | 0.01675  |
| 2487  | LYPLAL1   | 653.4130567 | 0.845311726 | 0.130366 | 6.484137 | 8.92E-11 | 7.03E-10 |
| 12486 | PON3      | 24.01074316 | 0.844983575 | 0.467472 | 1.80756  | 0.070675 | 0.110948 |
| 7879  | C10orf108 | 157.1988215 | 0.84494976  | 0.244301 | 3.458649 | 0.000543 | 0.00135  |
| 6321  | PPTC7     | 944.2581932 | 0.843831738 | 0.205012 | 4.116014 | 3.85E-05 | 0.00012  |
| 2823  | CENPC1    | 314.8328365 | 0.843645552 | 0.136785 | 6.167675 | 6.93E-10 | 4.81E-09 |
| 823   | OCIAD1    | 2978.483175 | 0.843354074 | 0.096915 | 8.702005 | 3.26E-18 | 7.77E-17 |
| 682   | ZNF329    | 285.3415938 | 0.843060572 | 0.09308  | 9.057346 | 1.34E-19 | 3.84E-18 |
| 5637  | TMEM64    | 1330.784679 | 0.842502952 | 0.18921  | 4.45274  | 8.48E-06 | 2.95E-05 |
| 3056  | SPTBN1    | 13832.74181 | 0.842182939 | 0.140518 | 5.993435 | 2.05E-09 | 1.32E-08 |
| 2395  | ARHGAP12  | 807.0174534 | 0.841413497 | 0.128194 | 6.56358  | 5.25E-11 | 4.30E-10 |
| 4189  | PLEKHA1   | 3151.852327 | 0.841085639 | 0.161252 | 5.21596  | 1.83E-07 | 8.56E-07 |
| 1123  | NAA35     | 306.5683009 | 0.840609089 | 0.103455 | 8.125349 | 4.46E-16 | 7.79E-15 |
| 8585  | CHCHD10   | 1062.738801 | 0.840488415 | 0.264425 | 3.178551 | 0.00148  | 0.003379 |
| 3184  | HERC1     | 1611.966452 | 0.840438004 | 0.142653 | 5.891468 | 3.83E-09 | 2.36E-08 |
| 1524  | C9orf80   | 204.7612453 | 0.839844312 | 0.111635 | 7.523108 | 5.35E-14 | 6.88E-13 |
| 931   | PPP2R1B   | 823.6685558 | 0.839053511 | 0.098951 | 8.479453 | 2.26E-17 | 4.76E-16 |
| 7802  | KIF12     | 912.0726733 | 0.839040554 | 0.239638 | 3.501281 | 0.000463 | 0.001163 |
| 7745  | PDE8B     | 89.60264095 | 0.83895727  | 0.238213 | 3.521883 | 0.000428 | 0.001084 |
| 9326  | EBF3      | 84.03361632 | 0.83886774  | 0.290269 | 2.889971 | 0.003853 | 0.008098 |
| 1763  | IDI1      | 701.9529195 | 0.838719959 | 0.116028 | 7.228619 | 4.88E-13 | 5.42E-12 |
| 1983  | ZNF252    | 560.6964415 | 0.838600582 | 0.120043 | 6.985862 | 2.83E-12 | 2.80E-11 |
| 1707  | RBM18     | 638.837195  | 0.838474161 | 0.11503  | 7.289191 | 3.12E-13 | 3.58E-12 |

|       |           |             |             |          |          |          |          |
|-------|-----------|-------------|-------------|----------|----------|----------|----------|
| 2353  | KRAS      | 1145.472716 | 0.838258513 | 0.12693  | 6.604078 | 4.00E-11 | 3.33E-10 |
| 6176  | SHMT1     | 3038.036612 | 0.838010849 | 0.200143 | 4.187052 | 2.83E-05 | 8.97E-05 |
| 2382  | TOM1L2    | 1262.209479 | 0.837963724 | 0.127434 | 6.575661 | 4.84E-11 | 3.99E-10 |
| 1495  | CDK20     | 230.1916885 | 0.837363561 | 0.110534 | 7.575639 | 3.57E-14 | 4.69E-13 |
| 1638  | DCAF10    | 1018.513222 | 0.836422688 | 0.113403 | 7.375652 | 1.64E-13 | 1.96E-12 |
| 9204  | ZNF667    | 57.44047408 | 0.836412591 | 0.284876 | 2.936062 | 0.003324 | 0.007079 |
| 838   | USP8      | 1274.79758  | 0.836210843 | 0.096644 | 8.652499 | 5.04E-18 | 1.18E-16 |
| 3084  | GCC2      | 1330.148811 | 0.836189384 | 0.139987 | 5.97332  | 2.32E-09 | 1.48E-08 |
| 2474  | ZNF440    | 242.2140826 | 0.835990254 | 0.128717 | 6.494808 | 8.31E-11 | 6.59E-10 |
| 12972 | NRG4      | 8.350574726 | 0.835156505 | 0.50561  | 1.651779 | 0.09858  | 0.148956 |
| 2755  | KIAA1632  | 906.4488246 | 0.835091272 | 0.133914 | 6.236034 | 4.49E-10 | 3.19E-09 |
| 7276  | ZNF677    | 37.52029379 | 0.834928032 | 0.224995 | 3.710871 | 0.000207 | 0.000556 |
| 2376  | CHD9      | 1566.84065  | 0.834559404 | 0.126736 | 6.585025 | 4.55E-11 | 3.75E-10 |
| 6881  | ZNF285    | 47.04367985 | 0.834493728 | 0.215556 | 3.871357 | 0.000108 | 0.000308 |
| 2471  | FAM8A1    | 1435.545511 | 0.833375033 | 0.128259 | 6.497602 | 8.16E-11 | 6.47E-10 |
| 8009  | DHRS4L1   | 18.40057535 | 0.832535811 | 0.244421 | 3.406157 | 0.000659 | 0.001612 |
| 7704  | ZNF257    | 35.08076284 | 0.832369434 | 0.235162 | 3.539555 | 0.000401 | 0.00102  |
| 3026  | PRKAB1    | 1715.077289 | 0.832331628 | 0.138367 | 6.015374 | 1.79E-09 | 1.16E-08 |
| 8451  | NGFR      | 537.1311982 | 0.831996555 | 0.257808 | 3.227201 | 0.00125  | 0.002899 |
| 9197  | PTH2R     | 59.65752532 | 0.831823238 | 0.282771 | 2.941686 | 0.003264 | 0.006958 |
| 1345  | LARP1B    | 509.4813864 | 0.831782793 | 0.106587 | 7.803798 | 6.01E-15 | 8.75E-14 |
| 9480  | CCNI2     | 12.34993087 | 0.831733635 | 0.294346 | 2.825697 | 0.004718 | 0.009755 |
| 7077  | NCOA2     | 741.7935389 | 0.830896698 | 0.219092 | 3.792455 | 0.000149 | 0.000413 |
| 11266 | TRIM61    | 5.311711975 | 0.830846992 | 0.378852 | 2.193065 | 0.028303 | 0.049246 |
| 2164  | CDC37L1   | 352.9333329 | 0.830265131 | 0.122147 | 6.797254 | 1.07E-11 | 9.66E-11 |
| 1330  | STXBP3    | 1171.734294 | 0.830247652 | 0.106091 | 7.825785 | 5.04E-15 | 7.44E-14 |
| 6203  | DEPDC4    | 7.581354766 | 0.830118421 | 0.198843 | 4.174734 | 2.98E-05 | 9.43E-05 |
| 1105  | ZMYND11   | 1965.638678 | 0.829982377 | 0.101788 | 8.154042 | 3.52E-16 | 6.24E-15 |
| 8012  | CYP4X1    | 84.85873038 | 0.829972326 | 0.243706 | 3.405636 | 0.00066  | 0.001615 |
| 788   | EXOC8     | 507.686606  | 0.829834733 | 0.094463 | 8.784728 | 1.57E-18 | 3.90E-17 |
| 2243  | DNAJC25   | 290.6488118 | 0.829801395 | 0.123798 | 6.702861 | 2.04E-11 | 1.79E-10 |
| 5873  | FZD5      | 970.038212  | 0.829508623 | 0.191315 | 4.335831 | 1.45E-05 | 4.85E-05 |
| 5411  | HIPK3     | 1433.595609 | 0.829483972 | 0.181908 | 4.559917 | 5.12E-06 | 1.85E-05 |
| 3334  | FBXO30    | 445.1119383 | 0.829314919 | 0.143121 | 5.794501 | 6.85E-09 | 4.03E-08 |
| 10291 | LOC645752 | 2.853825272 | 0.829293762 | 0.325353 | 2.548904 | 0.010806 | 0.020582 |
| 2516  | ISCA2     | 385.8921909 | 0.829229852 | 0.128594 | 6.448453 | 1.13E-10 | 8.80E-10 |
| 1851  | ADCY9     | 1123.417824 | 0.828207136 | 0.116088 | 7.134334 | 9.73E-13 | 1.03E-11 |
| 4551  | PDZD8     | 722.1223063 | 0.828164768 | 0.165334 | 5.009026 | 5.47E-07 | 2.36E-06 |
| 2377  | PDHX      | 640.7614026 | 0.828071886 | 0.12576  | 6.58453  | 4.56E-11 | 3.76E-10 |
| 8148  | TDRD6     | 22.44672106 | 0.82772831  | 0.24685  | 3.353168 | 0.000799 | 0.001922 |
| 849   | THAP6     | 356.3446855 | 0.82769013  | 0.095825 | 8.637516 | 5.74E-18 | 1.33E-16 |
| 6454  | C4orf32   | 526.5962801 | 0.827426232 | 0.204432 | 4.047442 | 5.18E-05 | 0.000157 |
| 158   | DNAJC16   | 724.4599028 | 0.827127555 | 0.071331 | 11.59555 | 4.34E-31 | 5.35E-29 |
| 2475  | SMC5      | 709.4336098 | 0.827116167 | 0.127359 | 6.494367 | 8.34E-11 | 6.60E-10 |
| 899   | KIAA1704  | 294.7066543 | 0.826943064 | 0.097013 | 8.524038 | 1.54E-17 | 3.36E-16 |
| 3162  | HERC3     | 922.1954081 | 0.826851969 | 0.139888 | 5.910826 | 3.40E-09 | 2.11E-08 |
| 5258  | USP12     | 437.07421   | 0.826563547 | 0.177889 | 4.646505 | 3.38E-06 | 1.26E-05 |

|       |          |             |             |          |          |          |          |
|-------|----------|-------------|-------------|----------|----------|----------|----------|
| 2005  | FAM188A  | 494.4415631 | 0.82627145  | 0.118868 | 6.951159 | 3.62E-12 | 3.54E-11 |
| 7459  | RGPD5    | 81.31092293 | 0.825879315 | 0.227298 | 3.633464 | 0.00028  | 0.000735 |
| 3695  | PPFIBP1  | 2707.820477 | 0.825802638 | 0.149137 | 5.537209 | 3.07E-08 | 1.63E-07 |
| 2528  | SYPL1    | 3923.308386 | 0.825478391 | 0.128169 | 6.440546 | 1.19E-10 | 9.23E-10 |
| 1990  | SSFA2    | 2431.830834 | 0.825207232 | 0.118268 | 6.977457 | 3.01E-12 | 2.96E-11 |
| 2371  | GNPDA2   | 413.0922633 | 0.825163527 | 0.125247 | 6.588288 | 4.45E-11 | 3.68E-10 |
| 6809  | CCDC147  | 12.52585875 | 0.825002213 | 0.211767 | 3.895799 | 9.79E-05 | 0.000282 |
| 2540  | KIAA1370 | 762.6199162 | 0.824992021 | 0.12829  | 6.430659 | 1.27E-10 | 9.80E-10 |
| 5150  | CLOCK    | 375.022527  | 0.824857366 | 0.175405 | 4.702587 | 2.57E-06 | 9.78E-06 |
| 15367 | GABRA5   | 2.121318601 | 0.824074084 | 0.915721 | 0.899918 | 0.368164 | 0.469602 |
| 8933  | SIX1     | 54.70194361 | 0.823895033 | 0.27101  | 3.040095 | 0.002365 | 0.005189 |
| 10027 | FABP3    | 1627.784975 | 0.822989872 | 0.311411 | 2.642779 | 0.008223 | 0.016074 |
| 1866  | AASDHPP1 | 1175.776587 | 0.822872664 | 0.115535 | 7.122291 | 1.06E-12 | 1.12E-11 |
| 938   | SDHC     | 2508.308225 | 0.822853529 | 0.097174 | 8.467839 | 2.50E-17 | 5.22E-16 |
| 3776  | ETNK1    | 1812.163939 | 0.822585954 | 0.149861 | 5.488989 | 4.04E-08 | 2.10E-07 |
| 3564  | GSTA4    | 423.67883   | 0.82230732  | 0.146135 | 5.627054 | 1.83E-08 | 1.01E-07 |
| 5216  | ZNF382   | 69.4631593  | 0.822292441 | 0.17599  | 4.67238  | 2.98E-06 | 1.12E-05 |
| 4081  | B3GALNT1 | 777.7069455 | 0.822016739 | 0.15538  | 5.290362 | 1.22E-07 | 5.86E-07 |
| 478   | LCMT2    | 279.4377295 | 0.821824615 | 0.084682 | 9.70486  | 2.87E-22 | 1.18E-20 |
| 8237  | TLR3     | 1351.679513 | 0.821629567 | 0.247699 | 3.317051 | 0.00091  | 0.002165 |
| 8461  | SEMA3G   | 417.0691119 | 0.821233936 | 0.254852 | 3.222392 | 0.001271 | 0.002945 |
| 9911  | CAPN3    | 373.0610916 | 0.821223605 | 0.305863 | 2.68494  | 0.007254 | 0.014347 |
| 1886  | FKTN     | 598.2485729 | 0.821144294 | 0.115667 | 7.099194 | 1.25E-12 | 1.30E-11 |
| 6276  | KCNK5    | 618.3004136 | 0.820994204 | 0.198237 | 4.141481 | 3.45E-05 | 0.000108 |
| 3326  | ABHD10   | 1128.448963 | 0.820851682 | 0.141535 | 5.799638 | 6.65E-09 | 3.92E-08 |
| 4364  | GLS      | 5702.043682 | 0.820381912 | 0.160111 | 5.123818 | 2.99E-07 | 1.34E-06 |
| 12575 | C1QL4    | 113.3743988 | 0.820206077 | 0.460892 | 1.779608 | 0.07514  | 0.117123 |
| 2990  | C18orf32 | 1489.674757 | 0.81878223  | 0.135476 | 6.043749 | 1.51E-09 | 9.87E-09 |
| 3266  | SERINC1  | 7823.122846 | 0.818668798 | 0.140258 | 5.836898 | 5.32E-09 | 3.19E-08 |
| 5640  | TBC1D9   | 1201.488111 | 0.817718467 | 0.183677 | 4.451947 | 8.51E-06 | 2.96E-05 |
| 2566  | XPO4     | 691.5310245 | 0.81757606  | 0.127503 | 6.412223 | 1.43E-10 | 1.10E-09 |
| 2002  | FAM36A   | 1217.970912 | 0.817461394 | 0.117531 | 6.95531  | 3.52E-12 | 3.44E-11 |
| 4194  | LYRM5    | 464.4043184 | 0.817362969 | 0.156798 | 5.212845 | 1.86E-07 | 8.69E-07 |
| 2800  | IFT88    | 455.5732459 | 0.817024448 | 0.131953 | 6.191787 | 5.95E-10 | 4.16E-09 |
| 1907  | ZNF274   | 518.1331452 | 0.816826554 | 0.115359 | 7.080748 | 1.43E-12 | 1.47E-11 |
| 3747  | FGFR1OP  | 389.9033382 | 0.816724443 | 0.148296 | 5.507387 | 3.64E-08 | 1.91E-07 |
| 5340  | SBNO1    | 460.5746584 | 0.816723592 | 0.177536 | 4.600329 | 4.22E-06 | 1.55E-05 |
| 6020  | TIGD4    | 14.4956001  | 0.816681806 | 0.191918 | 4.255363 | 2.09E-05 | 6.80E-05 |
| 10865 | BMX      | 28.45220037 | 0.816540451 | 0.349684 | 2.335083 | 0.019539 | 0.035249 |
| 3988  | BEND7    | 541.6687312 | 0.81641031  | 0.152586 | 5.350493 | 8.77E-08 | 4.31E-07 |
| 3200  | LACE1    | 80.96571358 | 0.816038605 | 0.138698 | 5.883544 | 4.02E-09 | 2.46E-08 |
| 3227  | ZNF295   | 587.6515258 | 0.815359175 | 0.138949 | 5.868051 | 4.41E-09 | 2.68E-08 |
| 1919  | DENND4C  | 1522.582462 | 0.815080758 | 0.115283 | 7.07026  | 1.55E-12 | 1.58E-11 |
| 2231  | FDX1     | 658.6216031 | 0.814991694 | 0.121285 | 6.719655 | 1.82E-11 | 1.60E-10 |
| 14641 | VN1R5    | 0.242825509 | 0.814956129 | 0.727727 | 1.119866 | 0.262771 | 0.351791 |
| 16834 | SLC22A25 | 0.21227187  | 0.814951569 | 1.691809 | 0.481704 | 0.630016 | 0.733572 |
| 17357 | SNTG1    | 0.189980568 | 0.814946515 | 2.320615 | 0.351177 | 0.725456 | 0.819246 |

|       |           |             |             |          |          |          |          |
|-------|-----------|-------------|-------------|----------|----------|----------|----------|
| 17546 | OR4A47    | 0.149277866 | 0.814942428 | 2.691973 | 0.302731 | 0.762095 | 0.851352 |
| 3571  | FBXO48    | 38.96731642 | 0.81482512  | 0.14491  | 5.622959 | 1.88E-08 | 1.03E-07 |
| 7568  | TEK       | 630.3190864 | 0.814368195 | 0.226863 | 3.589687 | 0.000331 | 0.000857 |
| 2989  | AGPS      | 1826.060741 | 0.814167304 | 0.134707 | 6.043966 | 1.50E-09 | 9.86E-09 |
| 15751 | ANKRD30A  | 0.822393735 | 0.814102603 | 1.031122 | 0.789531 | 0.429802 | 0.534858 |
| 2788  | ZNF81     | 153.2079547 | 0.813844654 | 0.13121  | 6.202612 | 5.55E-10 | 3.90E-09 |
| 9001  | FAM81A    | 79.489662   | 0.813385931 | 0.270056 | 3.011914 | 0.002596 | 0.005653 |
| 5627  | TMPPE     | 42.78964973 | 0.813362459 | 0.182483 | 4.457193 | 8.30E-06 | 2.89E-05 |
| 1973  | DDHD2     | 1112.689521 | 0.813326937 | 0.116203 | 6.999175 | 2.57E-12 | 2.56E-11 |
| 4495  | CCNB1IP1  | 835.1607348 | 0.812933471 | 0.16126  | 5.041142 | 4.63E-07 | 2.02E-06 |
| 6857  | LACTB2    | 967.3288447 | 0.812722062 | 0.209544 | 3.878518 | 0.000105 | 0.0003   |
| 7876  | DNAH7     | 74.56589054 | 0.812630578 | 0.23475  | 3.461681 | 0.000537 | 0.001336 |
| 11460 | CLEC18A   | 2167.93793  | 0.81217356  | 0.381022 | 2.131566 | 0.033043 | 0.056515 |
| 3614  | EIF1B     | 789.9402335 | 0.810835285 | 0.144813 | 5.599207 | 2.15E-08 | 1.17E-07 |
| 1568  | GHITM     | 5188.626756 | 0.81066574  | 0.10851  | 7.470919 | 7.96E-14 | 9.96E-13 |
| 3310  | ZNF568    | 117.8005875 | 0.810539863 | 0.139491 | 5.810691 | 6.22E-09 | 3.68E-08 |
| 5309  | FAM161B   | 101.5887917 | 0.810375062 | 0.175602 | 4.614836 | 3.93E-06 | 1.45E-05 |
| 3790  | FBXO21    | 1416.105132 | 0.810241428 | 0.147869 | 5.47945  | 4.27E-08 | 2.21E-07 |
| 5722  | DNAJB9    | 2789.264588 | 0.810198237 | 0.183738 | 4.409525 | 1.04E-05 | 3.55E-05 |
| 2591  | YES1      | 1550.780216 | 0.809200655 | 0.126583 | 6.392637 | 1.63E-10 | 1.23E-09 |
| 7291  | ZNF781    | 36.18312339 | 0.80872946  | 0.218454 | 3.702062 | 0.000214 | 0.000575 |
| 1624  | SCRN3     | 358.6377277 | 0.808714411 | 0.109369 | 7.394348 | 1.42E-13 | 1.72E-12 |
| 3075  | SS18L1    | 380.1959368 | 0.808627415 | 0.135225 | 5.979882 | 2.23E-09 | 1.42E-08 |
| 9696  | COX7A1    | 335.7489322 | 0.808558889 | 0.294306 | 2.747339 | 0.006008 | 0.012146 |
| 13352 | VWDE      | 17.19872608 | 0.808486481 | 0.528934 | 1.528521 | 0.126383 | 0.185533 |
| 1309  | ZNF136    | 244.5523446 | 0.808415389 | 0.102992 | 7.849316 | 4.18E-15 | 6.26E-14 |
| 12406 | TNMD      | 7.521298139 | 0.808341291 | 0.440751 | 1.834007 | 0.066653 | 0.105309 |
| 7552  | DLL1      | 360.3017984 | 0.807999371 | 0.224785 | 3.594536 | 0.000325 | 0.000843 |
| 2507  | ST7       | 937.9280926 | 0.807655712 | 0.125084 | 6.456896 | 1.07E-10 | 8.36E-10 |
| 6243  | RDH10     | 1119.539694 | 0.80729283  | 0.194193 | 4.157171 | 3.22E-05 | 0.000101 |
| 5517  | L3MBTL4   | 192.5333795 | 0.807216068 | 0.178863 | 4.513034 | 6.39E-06 | 2.27E-05 |
| 4313  | MEM161E   | 336.9619353 | 0.806911334 | 0.156717 | 5.148848 | 2.62E-07 | 1.19E-06 |
| 7556  | TRIM6     | 356.658096  | 0.806889336 | 0.224562 | 3.593162 | 0.000327 | 0.000847 |
| 14780 | LRRTM3    | 0.491042495 | 0.806722339 | 0.750858 | 1.074401 | 0.282643 | 0.374836 |
| 5604  | LOC220729 | 184.2388013 | 0.806699308 | 0.18051  | 4.469008 | 7.86E-06 | 2.75E-05 |
| 5693  | REST      | 314.6055778 | 0.806516548 | 0.182324 | 4.423544 | 9.71E-06 | 3.34E-05 |
| 1024  | ACTR10    | 1068.432537 | 0.806315305 | 0.097178 | 8.297285 | 1.07E-16 | 2.04E-15 |
| 5317  | TGFBR2    | 5636.626846 | 0.806004137 | 0.17472  | 4.613122 | 3.97E-06 | 1.46E-05 |
| 5335  | CLMN      | 1025.215515 | 0.805596315 | 0.17497  | 4.604206 | 4.14E-06 | 1.52E-05 |
| 2143  | UBR1      | 807.1111046 | 0.805427191 | 0.118226 | 6.812622 | 9.58E-12 | 8.77E-11 |
| 2794  | ITM2B     | 35557.93359 | 0.805382388 | 0.129939 | 6.198157 | 5.71E-10 | 4.01E-09 |
| 15009 | LMX1A     | 0.622187688 | 0.805377579 | 0.800545 | 1.006037 | 0.314398 | 0.410588 |
| 2240  | DHFRL1    | 246.8906301 | 0.805285136 | 0.12005  | 6.707909 | 1.97E-11 | 1.73E-10 |
| 3258  | ZBTB43    | 391.6948413 | 0.805080526 | 0.137696 | 5.846797 | 5.01E-09 | 3.01E-08 |
| 11046 | CYP2C8    | 52.46890816 | 0.804718618 | 0.353805 | 2.27447  | 0.022938 | 0.040703 |
| 8364  | ANKRD20A  | 13.48778665 | 0.804550478 | 0.246345 | 3.265948 | 0.001091 | 0.002557 |
| 3573  | NT5DC1    | 867.1409983 | 0.804369068 | 0.143073 | 5.62209  | 1.89E-08 | 1.03E-07 |

|       |           |             |             |          |          |          |          |
|-------|-----------|-------------|-------------|----------|----------|----------|----------|
| 1400  | CHUK      | 603.6432234 | 0.804208495 | 0.104256 | 7.713801 | 1.22E-14 | 1.71E-13 |
| 3640  | MANSC1    | 419.8767366 | 0.804009924 | 0.144146 | 5.577759 | 2.44E-08 | 1.31E-07 |
| 1728  | TMED8     | 583.1422145 | 0.803873273 | 0.110593 | 7.268758 | 3.63E-13 | 4.12E-12 |
| 4237  | PGRMC1    | 6942.689994 | 0.803869096 | 0.154961 | 5.187553 | 2.13E-07 | 9.86E-07 |
| 2857  | LIN54     | 429.5804863 | 0.803239025 | 0.130853 | 6.138505 | 8.33E-10 | 5.72E-09 |
| 7350  | FGF13     | 179.2117353 | 0.802823052 | 0.218125 | 3.680557 | 0.000233 | 0.000621 |
| 1786  | C1orf27   | 825.9933412 | 0.802686752 | 0.111443 | 7.202643 | 5.91E-13 | 6.48E-12 |
| 5038  | PXMP2     | 317.9428665 | 0.802661234 | 0.168829 | 4.754283 | 1.99E-06 | 7.75E-06 |
| 10645 | LOC389791 | 2.826207071 | 0.802646735 | 0.332337 | 2.415158 | 0.015728 | 0.028961 |
| 7746  | TMEM88    | 187.0249398 | 0.802170047 | 0.227849 | 3.520625 | 0.000431 | 0.001089 |
| 3734  | SGK3      | 560.6472163 | 0.802101295 | 0.14543  | 5.515361 | 3.48E-08 | 1.83E-07 |
| 9877  | FLJ35024  | 23.52829645 | 0.801871482 | 0.297536 | 2.69504  | 0.007038 | 0.013967 |
| 4575  | PLEKHG3   | 775.480154  | 0.80184329  | 0.160442 | 4.997705 | 5.80E-07 | 2.49E-06 |
| 8742  | PDZD2     | 1172.435446 | 0.801526947 | 0.257615 | 3.11134  | 0.001862 | 0.004176 |
| 3509  | HSD17B12  | 2013.587684 | 0.801082087 | 0.141366 | 5.666729 | 1.46E-08 | 8.13E-08 |
| 7385  | CCDC21    | 235.2508302 | 0.800880546 | 0.218712 | 3.661797 | 0.00025  | 0.000665 |
| 6056  | OC1001286 | 37.19412776 | 0.800862835 | 0.18881  | 4.241635 | 2.22E-05 | 7.18E-05 |
| 9054  | TCEAL5    | 7.157964121 | 0.800745875 | 0.267314 | 2.995524 | 0.00274  | 0.005931 |
| 8276  | SOX9      | 1349.911041 | 0.800680303 | 0.242475 | 3.302118 | 0.00096  | 0.002273 |
| 5376  | MTFR1     | 852.9062746 | 0.800653843 | 0.174883 | 4.578218 | 4.69E-06 | 1.71E-05 |
| 10796 | RLN1      | 1.302188894 | 0.80043132  | 0.33865  | 2.363595 | 0.018099 | 0.032859 |
| 15728 | SOHLH1    | 0.541747687 | 0.799805621 | 1.004896 | 0.795909 | 0.426085 | 0.531008 |
| 669   | AP1G1     | 2799.875414 | 0.799774425 | 0.087798 | 9.109272 | 8.29E-20 | 2.43E-18 |
| 1681  | ARHGEF12  | 7026.238759 | 0.799768778 | 0.10928  | 7.318499 | 2.51E-13 | 2.92E-12 |
| 7701  | SRL       | 40.81263875 | 0.799622208 | 0.225865 | 3.540267 | 0.0004   | 0.001018 |
| 5983  | NLN       | 405.6947453 | 0.799161396 | 0.186881 | 4.276306 | 1.90E-05 | 6.23E-05 |
| 454   | ADH5      | 3233.862211 | 0.798623815 | 0.08156  | 9.791889 | 1.22E-22 | 5.27E-21 |
| 3909  | ZNF429    | 193.5434486 | 0.798228395 | 0.147898 | 5.397142 | 6.77E-08 | 3.40E-07 |
| 3202  | ZNF626    | 270.4499329 | 0.798191082 | 0.13568  | 5.882908 | 4.03E-09 | 2.47E-08 |
| 8126  | GLCCI1    | 510.7210863 | 0.798043359 | 0.237498 | 3.36021  | 0.000779 | 0.001878 |
| 11397 | ACVR1C    | 22.36539645 | 0.797752572 | 0.370953 | 2.150552 | 0.031512 | 0.054195 |
| 1536  | GIN1      | 156.0397925 | 0.797720533 | 0.106225 | 7.509751 | 5.92E-14 | 7.56E-13 |
| 7046  | SORD      | 603.0329454 | 0.797697485 | 0.209778 | 3.802575 | 0.000143 | 0.000398 |
| 11024 | AP1M2     | 336.9965467 | 0.797652433 | 0.349574 | 2.281784 | 0.022502 | 0.040009 |
| 9013  | ATP8B4    | 208.1374747 | 0.797563709 | 0.26517  | 3.007742 | 0.002632 | 0.005724 |
| 3411  | ZNF674    | 78.15563472 | 0.797279892 | 0.138875 | 5.740973 | 9.41E-09 | 5.41E-08 |
| 5281  | HIST4H4   | 20.94979308 | 0.797227691 | 0.172005 | 4.634903 | 3.57E-06 | 1.33E-05 |
| 4100  | RNPC3     | 218.0671039 | 0.796969779 | 0.150905 | 5.281279 | 1.28E-07 | 6.13E-07 |
| 6550  | LCOR      | 106.2384694 | 0.796880768 | 0.198919 | 4.006061 | 6.17E-05 | 0.000185 |
| 1650  | THTPA     | 352.4431534 | 0.796712341 | 0.10826  | 7.359235 | 1.85E-13 | 2.20E-12 |
| 7278  | C7orf46   | 82.59696922 | 0.796326969 | 0.214662 | 3.709674 | 0.000208 | 0.000559 |
| 6135  | RGAG4     | 291.8301934 | 0.795784283 | 0.189199 | 4.206062 | 2.60E-05 | 8.30E-05 |
| 5742  | FBXO10    | 228.1470167 | 0.795701265 | 0.180807 | 4.400822 | 1.08E-05 | 3.68E-05 |
| 6701  | ZNF415    | 156.6375541 | 0.79559716  | 0.201904 | 3.940468 | 8.13E-05 | 0.000238 |
| 6034  | TEF       | 907.6205614 | 0.795527847 | 0.187145 | 4.250856 | 2.13E-05 | 6.92E-05 |
| 6667  | TBC1D24   | 339.2255159 | 0.795332225 | 0.201067 | 3.955568 | 7.64E-05 | 0.000224 |
| 1338  | ATPAF1    | 1455.479056 | 0.795197401 | 0.101819 | 7.809935 | 5.72E-15 | 8.38E-14 |

|       |           |             |             |          |          |          |          |
|-------|-----------|-------------|-------------|----------|----------|----------|----------|
| 1042  | RAB21     | 1720.125433 | 0.795175488 | 0.096342 | 8.253644 | 1.54E-16 | 2.89E-15 |
| 999   | RPRD1A    | 1102.491424 | 0.795024028 | 0.095216 | 8.349661 | 6.85E-17 | 1.34E-15 |
| 1582  | ZNF552    | 133.2782257 | 0.794864216 | 0.106777 | 7.444146 | 9.76E-14 | 1.21E-12 |
| 2793  | ZNF551    | 109.910101  | 0.794626676 | 0.1282   | 6.198332 | 5.71E-10 | 4.00E-09 |
| 8307  | SLC16A13  | 189.7416199 | 0.793957819 | 0.241357 | 3.28956  | 0.001003 | 0.002368 |
| 6180  | LOC92973  | 29.96692867 | 0.793501994 | 0.189575 | 4.185699 | 2.84E-05 | 9.02E-05 |
| 8055  | SLC16A4   | 2601.242065 | 0.793190217 | 0.23389  | 3.3913   | 0.000696 | 0.001693 |
| 2054  | TFAM      | 505.4395021 | 0.792951797 | 0.114941 | 6.8988   | 5.24E-12 | 5.00E-11 |
| 1699  | FTSJD1    | 615.3090475 | 0.792890618 | 0.108696 | 7.294543 | 3.00E-13 | 3.46E-12 |
| 15634 | VWC2      | 1.627032142 | 0.79260736  | 0.959196 | 0.826325 | 0.40862  | 0.512304 |
| 2108  | KIDINS22C | 2311.787241 | 0.791733876 | 0.115707 | 6.842596 | 7.78E-12 | 7.23E-11 |
| 1646  | ZNF417    | 162.5883883 | 0.79143061  | 0.107453 | 7.365368 | 1.77E-13 | 2.10E-12 |
| 9059  | MYCN      | 15.74324603 | 0.791241078 | 0.264252 | 2.994268 | 0.002751 | 0.005952 |
| 6380  | MLYCD     | 806.7575879 | 0.791220886 | 0.193632 | 4.08621  | 4.38E-05 | 0.000135 |
| 11260 | LIMS3     | 30.82257015 | 0.790417084 | 0.360213 | 2.194305 | 0.028214 | 0.049113 |
| 12172 | HAGHL     | 199.7761762 | 0.790087952 | 0.414686 | 1.905268 | 0.056745 | 0.091379 |
| 3725  | HECTD1    | 3113.001793 | 0.790035904 | 0.143033 | 5.523441 | 3.32E-08 | 1.75E-07 |
| 929   | DNAL1     | 486.4049137 | 0.789857512 | 0.093144 | 8.479998 | 2.25E-17 | 4.75E-16 |
| 2685  | B3GALTL   | 453.0560227 | 0.789742759 | 0.125502 | 6.292668 | 3.12E-10 | 2.28E-09 |
| 8815  | PNPLA7    | 271.2790173 | 0.789664047 | 0.256152 | 3.0828   | 0.002051 | 0.00456  |
| 4951  | GCNT2     | 576.081259  | 0.789610286 | 0.164629 | 4.796306 | 1.62E-06 | 6.40E-06 |
| 2650  | CRY1      | 484.0406382 | 0.7894914   | 0.124828 | 6.324648 | 2.54E-10 | 1.88E-09 |
| 2318  | C11orf71  | 296.0128262 | 0.788511281 | 0.118742 | 6.640555 | 3.13E-11 | 2.64E-10 |
| 3028  | ZNF570    | 68.48391593 | 0.787869287 | 0.131046 | 6.01217  | 1.83E-09 | 1.18E-08 |
| 3195  | CD59      | 18501.53348 | 0.787866695 | 0.13384  | 5.88665  | 3.94E-09 | 2.42E-08 |
| 10010 | DEGS2     | 41.20832248 | 0.787801043 | 0.297287 | 2.649969 | 0.00805  | 0.015763 |
| 2730  | ZHX1      | 908.6939683 | 0.787678058 | 0.125907 | 6.256054 | 3.95E-10 | 2.84E-09 |
| 2247  | PRKAR1A   | 7966.454004 | 0.787298747 | 0.117507 | 6.699994 | 2.08E-11 | 1.82E-10 |
| 14253 | TAAR6     | 0.4222124   | 0.786655403 | 0.633475 | 1.241809 | 0.214307 | 0.294736 |
| 2962  | IPP       | 206.6182182 | 0.786497862 | 0.129734 | 6.062386 | 1.34E-09 | 8.88E-09 |
| 6738  | FAAH2     | 135.9891413 | 0.786461281 | 0.20033  | 3.92582  | 8.64E-05 | 0.000251 |
| 10997 | LYG1      | 253.7176929 | 0.786232154 | 0.343466 | 2.289112 | 0.022073 | 0.039342 |
| 2133  | FBXL4     | 334.2031968 | 0.786171501 | 0.115256 | 6.82111  | 9.03E-12 | 8.30E-11 |
| 3763  | PHLPP2    | 387.5155526 | 0.786123512 | 0.142945 | 5.499493 | 3.81E-08 | 1.98E-07 |
| 4297  | HCCS      | 621.975956  | 0.78604052  | 0.152375 | 5.158597 | 2.49E-07 | 1.13E-06 |
| 4504  | ZNF468    | 489.4902681 | 0.785872906 | 0.156111 | 5.034061 | 4.80E-07 | 2.09E-06 |
| 2272  | GUF1      | 608.3972898 | 0.785860695 | 0.11773  | 6.675101 | 2.47E-11 | 2.13E-10 |
| 4805  | CEP78     | 186.5822185 | 0.785783375 | 0.160868 | 4.884653 | 1.04E-06 | 4.23E-06 |
| 1072  | TRAF6     | 246.3513118 | 0.785752502 | 0.09576  | 8.20543  | 2.30E-16 | 4.20E-15 |
| 3082  | SERAC1    | 167.1425764 | 0.785663066 | 0.13147  | 5.975983 | 2.29E-09 | 1.45E-08 |
| 8008  | FAM110B   | 280.0846008 | 0.785534062 | 0.230605 | 3.406409 | 0.000658 | 0.001611 |
| 2275  | MAGEE1    | 117.8968281 | 0.78502311  | 0.117629 | 6.673748 | 2.49E-11 | 2.15E-10 |
| 6098  | TGFBR3    | 948.0988386 | 0.78340595  | 0.18556  | 4.221853 | 2.42E-05 | 7.79E-05 |
| 5533  | MCF2L     | 986.107219  | 0.783156205 | 0.173861 | 4.504505 | 6.65E-06 | 2.36E-05 |
| 11408 | GPNMB     | 12173.7679  | 0.783023043 | 0.364744 | 2.146774 | 0.031811 | 0.054661 |
| 4090  | OSBPL8    | 2215.060176 | 0.782802213 | 0.148076 | 5.286503 | 1.25E-07 | 5.98E-07 |
| 5399  | JMY       | 469.4210438 | 0.782749719 | 0.17143  | 4.566    | 4.97E-06 | 1.80E-05 |



|       |           |             |             |          |          |          |          |
|-------|-----------|-------------|-------------|----------|----------|----------|----------|
| 5862  | FOXO1     | 912.4962807 | 0.782700757 | 0.180341 | 4.340113 | 1.42E-05 | 4.76E-05 |
| 3042  | MTHFD2L   | 167.5496314 | 0.782647085 | 0.130341 | 6.004625 | 1.92E-09 | 1.24E-08 |
| 2913  | RICTOR    | 1021.13131  | 0.782376345 | 0.128227 | 6.101506 | 1.05E-09 | 7.07E-09 |
| 4388  | UBE2W     | 841.256231  | 0.782269424 | 0.153098 | 5.109583 | 3.23E-07 | 1.44E-06 |
| 1838  | GLUD1     | 6005.8871   | 0.781897077 | 0.109359 | 7.149848 | 8.69E-13 | 9.26E-12 |
| 3170  | ANKRD6    | 440.8928301 | 0.78155931  | 0.132351 | 5.905193 | 3.52E-09 | 2.18E-08 |
| 904   | RMND5A    | 1523.539043 | 0.78154336  | 0.091808 | 8.512842 | 1.70E-17 | 3.68E-16 |
| 9535  | C22orf15  | 2.915701962 | 0.780743872 | 0.27844  | 2.803993 | 0.005047 | 0.010376 |
| 4047  | LRRC40    | 509.6108854 | 0.780735839 | 0.14709  | 5.307867 | 1.11E-07 | 5.37E-07 |
| 7303  | LOC730101 | 191.4536083 | 0.780361671 | 0.210983 | 3.6987   | 0.000217 | 0.000582 |
| 4390  | AKD1      | 121.6880478 | 0.7798381   | 0.152651 | 5.108641 | 3.24E-07 | 1.45E-06 |
| 3139  | PTPN4     | 210.5516604 | 0.779070732 | 0.131294 | 5.933782 | 2.96E-09 | 1.85E-08 |
| 6215  | GBAS      | 1623.767934 | 0.778929403 | 0.186761 | 4.170721 | 3.04E-05 | 9.58E-05 |
| 11117 | LRRC39    | 20.20093354 | 0.778883862 | 0.346788 | 2.245993 | 0.024704 | 0.043558 |
| 2640  | HCFC2     | 548.9337451 | 0.77860311  | 0.122879 | 6.336341 | 2.35E-10 | 1.75E-09 |
| 3785  | WDSUB1    | 321.99371   | 0.778583217 | 0.142049 | 5.481097 | 4.23E-08 | 2.19E-07 |
| 12700 | OC1001302 | 50.37818979 | 0.777976917 | 0.448688 | 1.733894 | 0.082937 | 0.128004 |
| 5059  | NELF      | 1166.433355 | 0.77783157  | 0.163997 | 4.742967 | 2.11E-06 | 8.16E-06 |
| 9653  | TESC      | 155.9553943 | 0.777796992 | 0.281492 | 2.763126 | 0.005725 | 0.011625 |
| 7355  | FAM108C1  | 218.0159801 | 0.777505414 | 0.211504 | 3.676086 | 0.000237 | 0.000631 |
| 5090  | OGDH      | 6032.956341 | 0.777443315 | 0.16437  | 4.729827 | 2.25E-06 | 8.65E-06 |
| 9679  | RNF157    | 449.0602441 | 0.777256863 | 0.282204 | 2.75424  | 0.005883 | 0.011914 |
| 3827  | PNPLA4    | 588.0602749 | 0.77672531  | 0.142525 | 5.449733 | 5.04E-08 | 2.58E-07 |
| 1759  | ATAD1     | 1112.310981 | 0.776714095 | 0.107414 | 7.230999 | 4.79E-13 | 5.34E-12 |
| 9060  | FAM154B   | 12.94238999 | 0.77654618  | 0.259348 | 2.994225 | 0.002751 | 0.005953 |
| 2951  | DENND4A   | 733.5601379 | 0.776294397 | 0.127897 | 6.069662 | 1.28E-09 | 8.51E-09 |
| 12121 | HSPB7     | 153.9061453 | 0.776153248 | 0.403835 | 1.921958 | 0.054611 | 0.088312 |
| 5136  | C6orf211  | 931.0326914 | 0.775871305 | 0.164704 | 4.710696 | 2.47E-06 | 9.42E-06 |
| 2160  | ZNF134    | 233.6999589 | 0.775767846 | 0.11409  | 6.79964  | 1.05E-11 | 9.52E-11 |
| 4798  | ZNF569    | 167.680603  | 0.775640687 | 0.158674 | 4.888268 | 1.02E-06 | 4.16E-06 |
| 11693 | CNNM1     | 152.0988724 | 0.775400117 | 0.377699 | 2.052959 | 0.040077 | 0.06718  |
| 3818  | AKT3      | 1266.179238 | 0.77531095  | 0.142041 | 5.458345 | 4.81E-08 | 2.47E-07 |
| 4528  | CMTM8     | 84.91534336 | 0.774213664 | 0.154251 | 5.019167 | 5.19E-07 | 2.25E-06 |
| 1511  | SEC24B    | 1286.960348 | 0.774200053 | 0.102502 | 7.553031 | 4.25E-14 | 5.52E-13 |
| 5009  | MCC       | 664.3766613 | 0.774132734 | 0.162331 | 4.768839 | 1.85E-06 | 7.25E-06 |
| 2829  | FNDC3A    | 2154.421916 | 0.773783786 | 0.125545 | 6.163386 | 7.12E-10 | 4.93E-09 |
| 7182  | PODXL     | 5181.45662  | 0.773394958 | 0.206176 | 3.751135 | 0.000176 | 0.00048  |
| 6916  | C1orf101  | 10.63956129 | 0.77334982  | 0.200495 | 3.857202 | 0.000115 | 0.000325 |
| 1992  | TCTA      | 1337.866112 | 0.77297287  | 0.110851 | 6.973054 | 3.10E-12 | 3.05E-11 |
| 14060 | IRX6      | 208.3178143 | 0.77293269  | 0.594847 | 1.29938  | 0.193814 | 0.270195 |
| 10584 | CD22      | 129.3473422 | 0.772708685 | 0.316576 | 2.440828 | 0.014654 | 0.027138 |
| 7904  | PDE2A     | 576.0007856 | 0.772244904 | 0.224072 | 3.446418 | 0.000568 | 0.001409 |
| 1573  | ZNF721    | 507.1008276 | 0.771116633 | 0.103329 | 7.462744 | 8.47E-14 | 1.06E-12 |
| 12214 | SLAH3     | 2.47957098  | 0.770821438 | 0.407336 | 1.892349 | 0.058444 | 0.093797 |
| 3047  | THAP5     | 765.8102903 | 0.770338904 | 0.128323 | 6.003101 | 1.94E-09 | 1.25E-08 |
| 5025  | C1orf115  | 1165.092291 | 0.770201622 | 0.161769 | 4.761117 | 1.93E-06 | 7.51E-06 |
| 6609  | ARHGEF37  | 797.9607133 | 0.770119507 | 0.193509 | 3.979765 | 6.90E-05 | 0.000205 |

|       |           |             |             |          |          |          |          |
|-------|-----------|-------------|-------------|----------|----------|----------|----------|
| 9113  | ITGB8     | 3250.514845 | 0.769684745 | 0.258828 | 2.973736 | 0.002942 | 0.006328 |
| 4028  | LARP4     | 1475.29241  | 0.769519772 | 0.144649 | 5.31992  | 1.04E-07 | 5.05E-07 |
| 7131  | ZNF577    | 130.8558077 | 0.768548585 | 0.203656 | 3.773755 | 0.000161 | 0.000442 |
| 4900  | PHACTR2   | 972.3912697 | 0.768172077 | 0.159162 | 4.826343 | 1.39E-06 | 5.56E-06 |
| 3482  | C6orf57   | 102.7276882 | 0.768012954 | 0.135063 | 5.686324 | 1.30E-08 | 7.31E-08 |
| 1413  | GRSF1     | 2114.999744 | 0.767712015 | 0.09992  | 7.68328  | 1.55E-14 | 2.15E-13 |
| 12772 | ANKRD43   | 49.18882436 | 0.767653882 | 0.44824  | 1.712596 | 0.086787 | 0.13319  |
| 6350  | HEY2      | 222.7999832 | 0.767528995 | 0.187127 | 4.101651 | 4.10E-05 | 0.000127 |
| 12787 | SLC12A3   | 23.79796195 | 0.767525526 | 0.449382 | 1.707957 | 0.087644 | 0.134338 |
| 2986  | TRIM23    | 501.9987363 | 0.767414494 | 0.126912 | 6.046833 | 1.48E-09 | 9.70E-09 |
| 4500  | TCP11L2   | 209.714626  | 0.767409467 | 0.152282 | 5.039413 | 4.67E-07 | 2.03E-06 |
| 11595 | FLJ46111  | 1.237263668 | 0.76736007  | 0.368595 | 2.081854 | 0.037356 | 0.063149 |
| 4128  | ARFGEF1   | 1752.665196 | 0.767308075 | 0.145775 | 5.263631 | 1.41E-07 | 6.71E-07 |
| 1127  | VPS36     | 1301.44631  | 0.767168717 | 0.094518 | 8.116681 | 4.79E-16 | 8.33E-15 |
| 1465  | KLRAQ1    | 750.5390345 | 0.766965599 | 0.100636 | 7.621199 | 2.51E-14 | 3.36E-13 |
| 6711  | CYB5A     | 5212.904623 | 0.766644008 | 0.194744 | 3.936681 | 8.26E-05 | 0.000241 |
| 4695  | ZNF254    | 370.4584952 | 0.766637132 | 0.155446 | 4.931852 | 8.15E-07 | 3.40E-06 |
| 12844 | LOC255167 | 24.40820006 | 0.766431451 | 0.452912 | 1.692229 | 0.090602 | 0.138267 |
| 12231 | C21orf129 | 1.336071882 | 0.766188418 | 0.405941 | 1.887436 | 0.059102 | 0.094714 |
| 2199  | ERLIN2    | 2001.341106 | 0.766102937 | 0.113395 | 6.75604  | 1.42E-11 | 1.26E-10 |
| 3068  | FXC1      | 823.7012156 | 0.766027785 | 0.128022 | 5.983547 | 2.18E-09 | 1.39E-08 |
| 9170  | NOXA1     | 129.9016146 | 0.76599155  | 0.259726 | 2.949234 | 0.003186 | 0.006809 |
| 2977  | SBF2      | 1298.5435   | 0.76593777  | 0.126574 | 6.051293 | 1.44E-09 | 9.46E-09 |
| 8929  | BMP4      | 220.6091101 | 0.765875128 | 0.251831 | 3.041223 | 0.002356 | 0.005172 |
| 3092  | EPT1      | 1036.542238 | 0.765734552 | 0.128293 | 5.968621 | 2.39E-09 | 1.52E-08 |
| 11210 | SLC19A3   | 209.6763864 | 0.765464777 | 0.345207 | 2.217408 | 0.026595 | 0.046502 |
| 2182  | ZNF791    | 269.7214701 | 0.765216599 | 0.112956 | 6.774461 | 1.25E-11 | 1.12E-10 |
| 7101  | STAG3L2   | 74.3402298  | 0.764987411 | 0.202228 | 3.782795 | 0.000155 | 0.000428 |
| 7954  | SUGT1P1   | 6.272971231 | 0.764492627 | 0.223196 | 3.425205 | 0.000614 | 0.001514 |
| 3177  | ZNF669    | 66.91998219 | 0.764058478 | 0.129569 | 5.896906 | 3.70E-09 | 2.29E-08 |
| 16264 | FAM150A   | 0.529603076 | 0.763938392 | 1.200936 | 0.636119 | 0.524699 | 0.632239 |
| 5019  | MEIS3P1   | 342.972577  | 0.76359341  | 0.160317 | 4.763022 | 1.91E-06 | 7.45E-06 |
| 8067  | PARK2     | 252.6971795 | 0.763512529 | 0.225541 | 3.385256 | 0.000711 | 0.001728 |
| 8482  | NET1      | 2337.766247 | 0.763303411 | 0.237513 | 3.21373  | 0.00131  | 0.003028 |
| 2016  | PHKB      | 2053.930982 | 0.763148032 | 0.109947 | 6.941052 | 3.89E-12 | 3.78E-11 |
| 3013  | RNF141    | 1210.428739 | 0.762992621 | 0.126665 | 6.023719 | 1.70E-09 | 1.11E-08 |
| 8222  | BMP6      | 214.5159009 | 0.762550655 | 0.229452 | 3.323361 | 0.000889 | 0.00212  |
| 3067  | ZBTB6     | 286.4609796 | 0.762522939 | 0.127413 | 5.984633 | 2.17E-09 | 1.39E-08 |
| 7171  | DGKH      | 66.46970187 | 0.762387019 | 0.203001 | 3.755588 | 0.000173 | 0.000473 |
| 10910 | CCDC144B  | 48.28389307 | 0.762331584 | 0.328881 | 2.317956 | 0.020452 | 0.036744 |
| 13383 | TMPRSS4   | 16.38349851 | 0.762274456 | 0.502695 | 1.516374 | 0.129425 | 0.189558 |
| 2122  | SDCCAG1   | 708.1965323 | 0.762196904 | 0.111612 | 6.828984 | 8.55E-12 | 7.90E-11 |
| 8924  | SCRN1     | 2087.013918 | 0.762159392 | 0.250503 | 3.04252  | 0.002346 | 0.005153 |
| 5011  | TSHZ1     | 1011.041307 | 0.761775754 | 0.159788 | 4.767407 | 1.87E-06 | 7.30E-06 |
| 1321  | EPM2AIP1  | 851.3822853 | 0.761644368 | 0.097245 | 7.832205 | 4.79E-15 | 7.11E-14 |
| 10118 | PLEKHH2   | 439.9444731 | 0.761509404 | 0.291821 | 2.609508 | 0.009067 | 0.017565 |
| 6239  | LONRF1    | 552.4440919 | 0.76127432  | 0.183048 | 4.158883 | 3.20E-05 | 0.0001   |

|       |           |             |             |          |          |          |          |
|-------|-----------|-------------|-------------|----------|----------|----------|----------|
| 760   | PRPSAP2   | 543.4035497 | 0.761234513 | 0.085899 | 8.861964 | 7.86E-19 | 2.03E-17 |
| 6563  | KIAA1529  | 105.0148555 | 0.761129768 | 0.190235 | 4.001004 | 6.31E-05 | 0.000188 |
| 10483 | DGKB      | 10.07688723 | 0.760854592 | 0.306977 | 2.478543 | 0.013192 | 0.024666 |
| 3729  | NDUFAF4   | 269.9911174 | 0.760772309 | 0.137823 | 5.519911 | 3.39E-08 | 1.78E-07 |
| 2141  | SFRS5     | 3424.835897 | 0.760595249 | 0.111634 | 6.813314 | 9.54E-12 | 8.73E-11 |
| 11847 | RASSF10   | 8.847951257 | 0.760432376 | 0.378889 | 2.007004 | 0.044749 | 0.074038 |
| 4279  | HEATR5A   | 498.5987451 | 0.760371437 | 0.147144 | 5.167537 | 2.37E-07 | 1.09E-06 |
| 9907  | REEP1     | 99.21909681 | 0.759975576 | 0.28296  | 2.685802 | 0.007236 | 0.014316 |
| 10065 | ACSM5     | 673.2132472 | 0.759495123 | 0.28863  | 2.631376 | 0.008504 | 0.016561 |
| 2659  | TTC21B    | 555.2764585 | 0.759467476 | 0.120172 | 6.319815 | 2.62E-10 | 1.93E-09 |
| 1818  | FECH      | 660.5493855 | 0.759285646 | 0.105861 | 7.172482 | 7.37E-13 | 7.94E-12 |
| 4370  | BBS12     | 293.7612062 | 0.759125589 | 0.148298 | 5.118913 | 3.07E-07 | 1.38E-06 |
| 3432  | LOC728024 | 16.96367087 | 0.758871716 | 0.132631 | 5.721697 | 1.05E-08 | 6.02E-08 |
| 8283  | CALCRL    | 2198.014795 | 0.758696205 | 0.229905 | 3.300046 | 0.000967 | 0.002288 |
| 12548 | VNN1      | 863.4807625 | 0.758404443 | 0.423419 | 1.791143 | 0.07327  | 0.114454 |
| 2180  | ZNF330    | 651.6999813 | 0.758219336 | 0.111858 | 6.778383 | 1.22E-11 | 1.09E-10 |
| 9380  | DOK6      | 184.7746007 | 0.758003764 | 0.26441  | 2.86677  | 0.004147 | 0.008665 |
| 10724 | BAIAP2L2  | 503.0256432 | 0.757938162 | 0.317397 | 2.387981 | 0.016941 | 0.030964 |
| 7625  | MFHAS1    | 275.3857074 | 0.757903543 | 0.212349 | 3.569143 | 0.000358 | 0.000921 |
| 9376  | GAS2L3    | 313.9396382 | 0.75790179  | 0.264052 | 2.870271 | 0.004101 | 0.008574 |
| 14194 | CRISP3    | 0.380533637 | 0.757648843 | 0.601578 | 1.259437 | 0.207873 | 0.287059 |
| 8213  | CTTNBP2   | 715.2747695 | 0.757606557 | 0.22778  | 3.326051 | 0.000881 | 0.002102 |
| 16139 | HIST1H2A4 | 0.156534844 | 0.757246838 | 1.131691 | 0.669129 | 0.503413 | 0.611401 |
| 16509 | NXF2B     | 0.192271236 | 0.757245994 | 1.329661 | 0.569503 | 0.569015 | 0.675587 |
| 17124 | SEMG2     | 0.197332878 | 0.757242731 | 1.870796 | 0.40477  | 0.685646 | 0.784826 |
| 17118 | OR1B1     | 0.185881036 | 0.757242697 | 1.861394 | 0.406815 | 0.684144 | 0.783335 |
| 17620 | KCNU1     | 0.196193451 | 0.757236329 | 2.6264   | 0.288317 | 0.773104 | 0.860023 |
| 17733 | LCE1A     | 0.122864445 | 0.757232346 | 2.91407  | 0.259854 | 0.794977 | 0.87872  |
| 1293  | EIF5      | 3779.84178  | 0.757172491 | 0.096183 | 7.872203 | 3.48E-15 | 5.28E-14 |
| 3098  | MED9      | 481.5198012 | 0.756278111 | 0.126787 | 5.964932 | 2.45E-09 | 1.55E-08 |
| 9252  | CHN2      | 179.2087556 | 0.756226893 | 0.259216 | 2.917367 | 0.00353  | 0.007479 |
| 3096  | UBXN2B    | 932.062639  | 0.755617416 | 0.12665  | 5.966166 | 2.43E-09 | 1.54E-08 |
| 1385  | CLPX      | 637.5241195 | 0.755546973 | 0.097682 | 7.734727 | 1.04E-14 | 1.47E-13 |
| 1687  | LOC400027 | 234.2649046 | 0.755529478 | 0.103312 | 7.313105 | 2.61E-13 | 3.03E-12 |
| 5249  | SLC25A15  | 240.8354111 | 0.75547715  | 0.162398 | 4.651999 | 3.29E-06 | 1.23E-05 |
| 1089  | C18orf55  | 401.8418446 | 0.755417499 | 0.092406 | 8.175004 | 2.96E-16 | 5.33E-15 |
| 10147 | TM7SF2    | 493.2350453 | 0.755061381 | 0.290433 | 2.599781 | 0.009328 | 0.01802  |
| 7135  | NUP62CL   | 53.42558837 | 0.75505455  | 0.200197 | 3.771565 | 0.000162 | 0.000446 |
| 2633  | NIPSNAP34 | 583.3258051 | 0.755014904 | 0.119034 | 6.342863 | 2.26E-10 | 1.68E-09 |
| 4574  | HSP90AA1  | 16425.43954 | 0.754556486 | 0.15097  | 4.998072 | 5.79E-07 | 2.48E-06 |
| 8562  | FAM107A   | 539.2526228 | 0.754541276 | 0.236851 | 3.185716 | 0.001444 | 0.003305 |
| 4884  | ZFP106    | 1831.827501 | 0.754506425 | 0.15597  | 4.837504 | 1.31E-06 | 5.28E-06 |
| 3869  | MTMR10    | 1590.878254 | 0.754139049 | 0.139092 | 5.421883 | 5.90E-08 | 2.99E-07 |
| 10741 | SLC6A16   | 41.86101848 | 0.754025363 | 0.316353 | 2.383495 | 0.017149 | 0.031295 |
| 8984  | CAND2     | 68.54219011 | 0.753900507 | 0.249635 | 3.020011 | 0.002528 | 0.005515 |
| 4917  | KIAA0284  | 838.5816914 | 0.753548295 | 0.156394 | 4.818277 | 1.45E-06 | 5.77E-06 |
| 7388  | C1orf51   | 197.1891925 | 0.753241419 | 0.205743 | 3.661078 | 0.000251 | 0.000666 |

|       |          |             |             |          |          |          |          |
|-------|----------|-------------|-------------|----------|----------|----------|----------|
| 6808  | HSPH1    | 1771.85367  | 0.753150616 | 0.193288 | 3.896518 | 9.76E-05 | 0.000281 |
| 6629  | PRKAR2A  | 245.6577023 | 0.753038076 | 0.189572 | 3.972309 | 7.12E-05 | 0.00021  |
| 11794 | PRRG3    | 2.952767589 | 0.752963703 | 0.372039 | 2.023882 | 0.042982 | 0.071434 |
| 1408  | CTR9     | 1260.479801 | 0.752638084 | 0.097871 | 7.690129 | 1.47E-14 | 2.05E-13 |
| 5721  | COQ9     | 1877.29272  | 0.752489165 | 0.170639 | 4.409824 | 1.03E-05 | 3.54E-05 |
| 989   | MTMR12   | 1207.546174 | 0.752321005 | 0.089972 | 8.361681 | 6.18E-17 | 1.23E-15 |
| 446   | FBXO9    | 801.0962279 | 0.752154132 | 0.076569 | 9.823208 | 8.95E-23 | 3.93E-21 |
| 2936  | MRPS35   | 1701.577714 | 0.751234686 | 0.123559 | 6.07997  | 1.20E-09 | 8.02E-09 |
| 2174  | NAPG     | 700.2521156 | 0.750926073 | 0.110622 | 6.788246 | 1.14E-11 | 1.02E-10 |
| 1811  | EIF4EBP2 | 5576.199995 | 0.750545784 | 0.104567 | 7.177673 | 7.09E-13 | 7.67E-12 |
| 532   | TTC19    | 966.7661998 | 0.750436048 | 0.07884  | 9.518483 | 1.76E-21 | 6.48E-20 |
| 5725  | RALGPS2  | 394.096993  | 0.750194089 | 0.170163 | 4.408688 | 1.04E-05 | 3.56E-05 |
| 2492  | ISCA1    | 1180.016793 | 0.750011537 | 0.115841 | 6.474507 | 9.51E-11 | 7.48E-10 |
| 14165 | FLJ16779 | 42.02601253 | 0.749930533 | 0.592014 | 1.266745 | 0.205247 | 0.284047 |
| 3620  | C6orf72  | 965.1537035 | 0.74988681  | 0.134085 | 5.592637 | 2.24E-08 | 1.21E-07 |
| 3140  | PKP4     | 2714.748659 | 0.749834761 | 0.126398 | 5.932339 | 2.99E-09 | 1.86E-08 |
| 2592  | RCBTB2   | 1110.475094 | 0.749760275 | 0.117349 | 6.389171 | 1.67E-10 | 1.26E-09 |
| 10183 | PKIB     | 117.1850532 | 0.749213773 | 0.289549 | 2.587524 | 0.009667 | 0.018607 |
| 4509  | YAF2     | 523.9065486 | 0.749061971 | 0.148944 | 5.029158 | 4.93E-07 | 2.14E-06 |
| 1501  | BBS7     | 328.1892672 | 0.748998422 | 0.098989 | 7.566514 | 3.83E-14 | 5.01E-13 |
| 3807  | DENND5B  | 684.1511519 | 0.748622215 | 0.136901 | 5.468345 | 4.54E-08 | 2.34E-07 |
| 9133  | MEM200A  | 1106.625451 | 0.748476244 | 0.252434 | 2.965039 | 0.003026 | 0.006495 |
| 3275  | PIAS2    | 319.6526474 | 0.748136728 | 0.128271 | 5.832485 | 5.46E-09 | 3.27E-08 |
| 2612  | FAM13B   | 836.4566041 | 0.747882163 | 0.117484 | 6.365808 | 1.94E-10 | 1.46E-09 |
| 3152  | FANCM    | 100.2850374 | 0.747838712 | 0.126372 | 5.917761 | 3.26E-09 | 2.03E-08 |
| 2101  | PKN2     | 1301.246487 | 0.747469475 | 0.109138 | 6.848859 | 7.44E-12 | 6.94E-11 |
| 7185  | C1orf229 | 12.40960405 | 0.747115801 | 0.199225 | 3.750117 | 0.000177 | 0.000482 |
| 2721  | STX7     | 2192.241996 | 0.746909173 | 0.119235 | 6.264191 | 3.75E-10 | 2.70E-09 |
| 3739  | B3GNT2   | 1258.97778  | 0.746813891 | 0.135465 | 5.512981 | 3.53E-08 | 1.85E-07 |
| 6557  | MIPOL1   | 65.37530781 | 0.746477671 | 0.186482 | 4.002941 | 6.26E-05 | 0.000187 |
| 2910  | EIF4E    | 526.3699749 | 0.746335047 | 0.122283 | 6.103335 | 1.04E-09 | 7.00E-09 |
| 8033  | PTPLB    | 190.0685505 | 0.746208547 | 0.219563 | 3.398611 | 0.000677 | 0.001653 |
| 1258  | ZNF304   | 334.5264753 | 0.746138312 | 0.094219 | 7.919175 | 2.39E-15 | 3.73E-14 |
| 8168  | FAAH     | 451.0091178 | 0.745941663 | 0.222911 | 3.346362 | 0.000819 | 0.001965 |
| 3435  | MTMR6    | 1195.875519 | 0.745908068 | 0.130386 | 5.720748 | 1.06E-08 | 6.05E-08 |
| 2619  | SNX14    | 1201.457253 | 0.745823245 | 0.117313 | 6.357542 | 2.05E-10 | 1.53E-09 |
| 11776 | SLC35F4  | 2.175727624 | 0.745292364 | 0.367345 | 2.028863 | 0.042472 | 0.070693 |
| 2215  | PDPK1    | 1456.798925 | 0.745095787 | 0.110527 | 6.741308 | 1.57E-11 | 1.39E-10 |
| 11206 | RGS9     | 77.55285642 | 0.744871329 | 0.335533 | 2.219961 | 0.026421 | 0.046215 |
| 6122  | MTUS1    | 1752.972909 | 0.744869378 | 0.176898 | 4.210718 | 2.55E-05 | 8.15E-05 |
| 2696  | NARS     | 3762.657955 | 0.744747114 | 0.118503 | 6.28463  | 3.29E-10 | 2.39E-09 |
| 3553  | COL4A3BF | 1592.854342 | 0.744179111 | 0.132116 | 5.632778 | 1.77E-08 | 9.78E-08 |
| 6825  | STRN     | 309.1105771 | 0.744173256 | 0.191299 | 3.890097 | 0.0001   | 0.000288 |
| 10859 | ATO8     | 307.5853926 | 0.743883101 | 0.318397 | 2.336335 | 0.019474 | 0.035151 |
| 5762  | DENND2C  | 44.54285485 | 0.743740792 | 0.169355 | 4.391602 | 1.13E-05 | 3.83E-05 |
| 3622  | AFF4     | 3858.19107  | 0.743597511 | 0.132984 | 5.591642 | 2.25E-08 | 1.22E-07 |
| 8172  | ZDHHC2   | 820.6553876 | 0.743548806 | 0.222273 | 3.345203 | 0.000822 | 0.001972 |

|       |          |             |             |          |          |          |          |
|-------|----------|-------------|-------------|----------|----------|----------|----------|
| 12629 | HHLA2    | 1450.773917 | 0.743530668 | 0.421375 | 1.764535 | 0.077642 | 0.120505 |
| 11596 | PCDHA10  | 94.55978458 | 0.743483382 | 0.357164 | 2.081631 | 0.037376 | 0.063178 |
| 3694  | ANKRD26  | 202.0706119 | 0.743320466 | 0.134239 | 5.537287 | 3.07E-08 | 1.63E-07 |
| 9673  | WDR16    | 3.105321526 | 0.743159385 | 0.269693 | 2.755573 | 0.005859 | 0.011872 |
| 3209  | VPS13B   | 951.6558795 | 0.743029874 | 0.12637  | 5.879812 | 4.11E-09 | 2.51E-08 |
| 2419  | SUZ12    | 889.9417952 | 0.742663338 | 0.113542 | 6.540873 | 6.12E-11 | 4.96E-10 |
| 3110  | WASL     | 2495.833968 | 0.742644228 | 0.124728 | 5.954104 | 2.62E-09 | 1.65E-08 |
| 3743  | DYNC2LI1 | 567.2353329 | 0.742248534 | 0.134692 | 5.51071  | 3.57E-08 | 1.87E-07 |
| 4704  | C1D      | 286.7232185 | 0.741940437 | 0.150528 | 4.928918 | 8.27E-07 | 3.44E-06 |
| 8383  | GRHL1    | 77.60301997 | 0.741937431 | 0.227736 | 3.257887 | 0.001122 | 0.002624 |
| 10773 | RASD1    | 739.8343092 | 0.74171272  | 0.3124   | 2.374238 | 0.017585 | 0.031998 |
| 7708  | UBE2Q2P1 | 23.43186634 | 0.74118018  | 0.209575 | 3.53659  | 0.000405 | 0.001031 |
| 1987  | TRMT2B   | 356.4908373 | 0.74103274  | 0.106144 | 6.981384 | 2.92E-12 | 2.88E-11 |
| 10880 | DPF3     | 120.5210927 | 0.740845615 | 0.318061 | 2.329256 | 0.019845 | 0.035753 |
| 3901  | BRCC3    | 314.7474238 | 0.740805353 | 0.137093 | 5.403651 | 6.53E-08 | 3.28E-07 |
| 10780 | UBD      | 2563.774128 | 0.740761008 | 0.312601 | 2.369667 | 0.017804 | 0.032373 |
| 6028  | ZCWPW2   | 13.99126204 | 0.740368864 | 0.174101 | 4.252516 | 2.11E-05 | 6.87E-05 |
| 2945  | CDC42SE2 | 2962.669441 | 0.740240963 | 0.121882 | 6.073423 | 1.25E-09 | 8.33E-09 |
| 3636  | SGMS1    | 818.020792  | 0.740119817 | 0.132615 | 5.580969 | 2.39E-08 | 1.29E-07 |
| 8942  | KLHL31   | 34.72827911 | 0.740074939 | 0.243857 | 3.034872 | 0.002406 | 0.005274 |
| 5276  | KIAA1804 | 617.3374407 | 0.739425189 | 0.159392 | 4.639022 | 3.50E-06 | 1.30E-05 |
| 1865  | FBXO8    | 557.5869735 | 0.739365717 | 0.103805 | 7.122633 | 1.06E-12 | 1.11E-11 |
| 3842  | USP45    | 248.0105363 | 0.739147533 | 0.135889 | 5.439347 | 5.35E-08 | 2.73E-07 |
| 4068  | AGPAT3   | 3240.684072 | 0.739116631 | 0.13953  | 5.297182 | 1.18E-07 | 5.67E-07 |
| 3623  | ZNF594   | 149.7640842 | 0.739003491 | 0.132177 | 5.591033 | 2.26E-08 | 1.22E-07 |
| 5941  | GALNT11  | 3161.455845 | 0.738792736 | 0.17191  | 4.297555 | 1.73E-05 | 5.70E-05 |
| 8052  | C2orf15  | 34.04690906 | 0.738453828 | 0.21773  | 3.391598 | 0.000695 | 0.001692 |
| 6708  | C15orf37 | 70.15974299 | 0.73833376  | 0.187489 | 3.938019 | 8.22E-05 | 0.00024  |
| 4016  | HINT3    | 897.1542744 | 0.738240211 | 0.138525 | 5.329308 | 9.86E-08 | 4.81E-07 |
| 3986  | KIF27    | 75.84505319 | 0.738091915 | 0.13793  | 5.351215 | 8.74E-08 | 4.30E-07 |
| 4862  | SUCLG2   | 1592.99243  | 0.737921412 | 0.151961 | 4.855992 | 1.20E-06 | 4.83E-06 |
| 2852  | RAB18    | 2046.637253 | 0.737305953 | 0.12004  | 6.142172 | 8.14E-10 | 5.59E-09 |
| 3615  | TAF1B    | 305.6844817 | 0.737204848 | 0.131722 | 5.596652 | 2.19E-08 | 1.18E-07 |
| 2458  | ANKS1A   | 873.2647164 | 0.736352958 | 0.11315  | 6.507756 | 7.63E-11 | 6.08E-10 |
| 10969 | NLRP11   | 16.99460343 | 0.736140293 | 0.320474 | 2.297033 | 0.021617 | 0.038625 |
| 3911  | ZNF396   | 51.84483624 | 0.735814247 | 0.136364 | 5.395961 | 6.82E-08 | 3.42E-07 |
| 5266  | FAM199X  | 694.011322  | 0.735398013 | 0.158354 | 4.644007 | 3.42E-06 | 1.27E-05 |
| 8615  | CCDC148  | 48.34161479 | 0.735363437 | 0.232055 | 3.168923 | 0.00153  | 0.003481 |
| 4284  | MFSD6    | 899.2655445 | 0.735313396 | 0.142389 | 5.164102 | 2.42E-07 | 1.11E-06 |
| 2191  | NAA15    | 1036.823335 | 0.735109508 | 0.108599 | 6.769052 | 1.30E-11 | 1.16E-10 |
| 5481  | KIAA1147 | 1731.374822 | 0.734850403 | 0.162228 | 4.529733 | 5.91E-06 | 2.11E-05 |
| 11748 | FAM83G   | 60.25004327 | 0.734569655 | 0.360477 | 2.037773 | 0.041573 | 0.069362 |
| 9595  | C16orf3  | 4.086581094 | 0.734248581 | 0.264035 | 2.780877 | 0.005421 | 0.011075 |
| 1856  | MRPL35   | 908.7039    | 0.734180504 | 0.102967 | 7.130255 | 1.00E-12 | 1.06E-11 |
| 4058  | GTF3C4   | 319.7312544 | 0.734164682 | 0.138475 | 5.301773 | 1.15E-07 | 5.54E-07 |
| 7047  | SDC2     | 4772.180049 | 0.734028801 | 0.193066 | 3.801954 | 0.000144 | 0.000399 |
| 8378  | FAM171B  | 226.3151979 | 0.733889821 | 0.225194 | 3.25893  | 0.001118 | 0.002616 |

|       |           |             |             |          |          |          |          |
|-------|-----------|-------------|-------------|----------|----------|----------|----------|
| 7203  | APOO      | 311.6058818 | 0.733811923 | 0.196055 | 3.742886 | 0.000182 | 0.000495 |
| 2204  | MTMR9     | 454.9005772 | 0.733723368 | 0.108679 | 6.751318 | 1.47E-11 | 1.30E-10 |
| 8580  | ZNF835    | 16.92386223 | 0.73366242  | 0.230706 | 3.180079 | 0.001472 | 0.003364 |
| 11620 | PHYHD1    | 175.2275659 | 0.73358015  | 0.353988 | 2.07233  | 0.038235 | 0.064496 |
| 6972  | MAST4     | 642.450997  | 0.733577631 | 0.191152 | 3.837667 | 0.000124 | 0.000349 |
| 2720  | MTMR15    | 543.290255  | 0.733446458 | 0.117084 | 6.264261 | 3.75E-10 | 2.70E-09 |
| 5769  | TTBK2     | 157.8337252 | 0.733375218 | 0.167178 | 4.386795 | 1.15E-05 | 3.91E-05 |
| 4208  | KIAA1107  | 119.6196142 | 0.732450257 | 0.140752 | 5.203841 | 1.95E-07 | 9.09E-07 |
| 6007  | ZNF763    | 80.81107327 | 0.732320882 | 0.171779 | 4.26315  | 2.02E-05 | 6.58E-05 |
| 6244  | CLDN23    | 150.9988024 | 0.73139232  | 0.175947 | 4.156893 | 3.23E-05 | 0.000101 |
| 4439  | APIP      | 440.8036949 | 0.731195716 | 0.143949 | 5.079538 | 3.78E-07 | 1.67E-06 |
| 6348  | LMTK2     | 500.2541568 | 0.730873436 | 0.178071 | 4.104399 | 4.05E-05 | 0.000125 |
| 5898  | MOSC1     | 226.2207134 | 0.730686791 | 0.169043 | 4.322479 | 1.54E-05 | 5.13E-05 |
| 13382 | CCDC54    | 0.679084265 | 0.730222409 | 0.48144  | 1.516745 | 0.129331 | 0.189435 |
| 4873  | GRB10     | 3359.992639 | 0.730098631 | 0.150612 | 4.847536 | 1.25E-06 | 5.03E-06 |
| 15506 | NEUROD1   | 0.403796951 | 0.730058881 | 0.850633 | 0.858254 | 0.390752 | 0.493947 |
| 3268  | PIKFYVE   | 956.9623818 | 0.729988028 | 0.125073 | 5.836489 | 5.33E-09 | 3.20E-08 |
| 13846 | BIRC7     | 170.0694837 | 0.729652163 | 0.532976 | 1.369015 | 0.170995 | 0.24205  |
| 4104  | C1orf203  | 72.68021712 | 0.729495854 | 0.138174 | 5.279551 | 1.30E-07 | 6.19E-07 |
| 2420  | TBC1D15   | 1382.312275 | 0.729459561 | 0.111524 | 6.540843 | 6.12E-11 | 4.96E-10 |
| 2666  | PIGH      | 422.9511961 | 0.729063343 | 0.115435 | 6.315778 | 2.69E-10 | 1.98E-09 |
| 11826 | C10orf107 | 29.34679333 | 0.728956617 | 0.362176 | 2.012715 | 0.044145 | 0.073168 |
| 12031 | CADPS     | 4.217386852 | 0.72887445  | 0.373383 | 1.952081 | 0.050929 | 0.082973 |
| 5713  | HDX       | 54.11311182 | 0.728843974 | 0.165122 | 4.413967 | 1.01E-05 | 3.48E-05 |
| 3868  | STK3      | 526.4453864 | 0.728578094 | 0.134367 | 5.42229  | 5.88E-08 | 2.98E-07 |
| 6698  | SLC22A23  | 593.5574825 | 0.728442009 | 0.184816 | 3.941441 | 8.10E-05 | 0.000237 |
| 4758  | HCP5      | 1414.451584 | 0.728292091 | 0.148457 | 4.905739 | 9.31E-07 | 3.83E-06 |
| 2966  | RBBP5     | 454.2875204 | 0.728249791 | 0.120223 | 6.057506 | 1.38E-09 | 9.14E-09 |
| 5342  | C5orf36   | 84.09376191 | 0.727908189 | 0.158247 | 4.599815 | 4.23E-06 | 1.55E-05 |
| 6893  | SLC25A42  | 696.2069901 | 0.727442646 | 0.188092 | 3.867482 | 0.00011  | 0.000313 |
| 2357  | CDC42BPA  | 2194.470339 | 0.727333183 | 0.110181 | 6.601258 | 4.08E-11 | 3.39E-10 |
| 9346  | SYNGR1    | 338.2859064 | 0.727145156 | 0.252543 | 2.879291 | 0.003986 | 0.008359 |
| 2937  | LIG4      | 329.5007909 | 0.726709123 | 0.119532 | 6.079645 | 1.20E-09 | 8.04E-09 |
| 6093  | PECR      | 623.7711048 | 0.726472241 | 0.171969 | 4.224448 | 2.40E-05 | 7.71E-05 |
| 15593 | MYH4      | 0.546351187 | 0.726244896 | 0.867879 | 0.836804 | 0.402703 | 0.506213 |
| 5472  | DAB2IP    | 2043.644998 | 0.726203936 | 0.160182 | 4.53361  | 5.80E-06 | 2.08E-05 |
| 3941  | G2E3      | 331.6088227 | 0.726182575 | 0.135003 | 5.379012 | 7.49E-08 | 3.73E-07 |
| 9565  | ZNF366    | 95.01273094 | 0.72608872  | 0.259746 | 2.795375 | 0.005184 | 0.010623 |
| 3261  | PEX1      | 564.1839535 | 0.725360066 | 0.12418  | 5.841219 | 5.18E-09 | 3.11E-08 |
| 5344  | CCDC126   | 195.9546368 | 0.724978413 | 0.157696 | 4.597315 | 4.28E-06 | 1.57E-05 |
| 2960  | C1orf74   | 75.37236121 | 0.724801602 | 0.119552 | 6.062666 | 1.34E-09 | 8.87E-09 |
| 965   | BTBD7     | 1014.888787 | 0.724764438 | 0.086095 | 8.418164 | 3.82E-17 | 7.77E-16 |
| 5086  | ZNF462    | 438.3718016 | 0.724741261 | 0.153211 | 4.730363 | 2.24E-06 | 8.64E-06 |
| 2024  | ZNF510    | 270.9371985 | 0.724593407 | 0.104477 | 6.935413 | 4.05E-12 | 3.92E-11 |
| 6341  | ZNF665    | 25.60390873 | 0.724489303 | 0.176359 | 4.108028 | 3.99E-05 | 0.000123 |
| 3607  | ZBTB33    | 700.8579099 | 0.724447231 | 0.129281 | 5.603663 | 2.10E-08 | 1.14E-07 |
| 6674  | GDPD1     | 32.64722776 | 0.723870274 | 0.18315  | 3.952327 | 7.74E-05 | 0.000227 |

|       |           |             |             |          |          |          |          |
|-------|-----------|-------------|-------------|----------|----------|----------|----------|
| 1911  | CHMP5     | 1861.688044 | 0.723486889 | 0.102249 | 7.075768 | 1.49E-12 | 1.52E-11 |
| 10429 | KCNJ16    | 3447.339307 | 0.722936192 | 0.289158 | 2.500144 | 0.012414 | 0.023332 |
| 10703 | DHDPSL    | 558.0303398 | 0.722439574 | 0.301504 | 2.396123 | 0.01657  | 0.030345 |
| 15012 | ROPN1B    | 0.432764318 | 0.722430628 | 0.718633 | 1.005284 | 0.31476  | 0.410997 |
| 13742 | MAGEE2    | 0.718889985 | 0.722178934 | 0.514335 | 1.404102 | 0.160289 | 0.228629 |
| 4563  | MMACHC    | 136.9768016 | 0.721920072 | 0.144292 | 5.003172 | 5.64E-07 | 2.42E-06 |
| 6930  | MAML2     | 746.5851103 | 0.721864956 | 0.187425 | 3.851485 | 0.000117 | 0.000332 |
| 6054  | ACO1      | 2292.87007  | 0.721759715 | 0.170156 | 4.241748 | 2.22E-05 | 7.18E-05 |
| 2317  | BAHD1     | 715.2839918 | 0.721746783 | 0.10868  | 6.641056 | 3.11E-11 | 2.63E-10 |
| 3648  | MMGT1     | 1080.488946 | 0.721731802 | 0.129511 | 5.572746 | 2.51E-08 | 1.35E-07 |
| 6489  | HSD17B8   | 330.7238478 | 0.721701738 | 0.17895  | 4.032975 | 5.51E-05 | 0.000166 |
| 2884  | USO1      | 2735.717707 | 0.721229289 | 0.117787 | 6.123142 | 9.17E-10 | 6.24E-09 |
| 7935  | MYCT1     | 555.5471029 | 0.721206656 | 0.210023 | 3.433937 | 0.000595 | 0.001469 |
| 2457  | PICALM    | 7250.789436 | 0.720805419 | 0.110753 | 6.508224 | 7.60E-11 | 6.07E-10 |
| 9670  | TM4SF18   | 1095.485735 | 0.720683204 | 0.261439 | 2.756603 | 0.005841 | 0.011839 |
| 13850 | ISM2      | 19.3438565  | 0.720637616 | 0.526612 | 1.368442 | 0.171174 | 0.242251 |
| 3302  | LONP2     | 1484.369139 | 0.719974791 | 0.123843 | 5.81361  | 6.11E-09 | 3.63E-08 |
| 8550  | HYAL1     | 919.0806651 | 0.719899209 | 0.225705 | 3.18956  | 0.001425 | 0.003267 |
| 10818 | LOC154822 | 13.68987428 | 0.719865195 | 0.305717 | 2.354676 | 0.018539 | 0.03359  |
| 1132  | CDKN2AIF  | 432.7495415 | 0.718942202 | 0.088624 | 8.112263 | 4.97E-16 | 8.60E-15 |
| 11383 | SLC10A4   | 2.616459397 | 0.718923435 | 0.333112 | 2.1582   | 0.030912 | 0.05323  |
| 7227  | FAM84A    | 362.5389889 | 0.718584616 | 0.192339 | 3.736041 | 0.000187 | 0.000507 |
| 1642  | SLC39A9   | 2177.953154 | 0.718536154 | 0.097476 | 7.37144  | 1.69E-13 | 2.01E-12 |
| 8441  | FAM65B    | 302.9991389 | 0.71836463  | 0.222357 | 3.230684 | 0.001235 | 0.002868 |
| 6171  | CRIM1     | 6475.532466 | 0.71832427  | 0.171438 | 4.189995 | 2.79E-05 | 8.86E-05 |
| 3273  | FH        | 1500.283431 | 0.718224457 | 0.123121 | 5.833483 | 5.43E-09 | 3.25E-08 |
| 3899  | POLK      | 778.2206022 | 0.718148649 | 0.132894 | 5.403918 | 6.52E-08 | 3.28E-07 |
| 3267  | BTBD1     | 1591.907064 | 0.718120856 | 0.12304  | 5.836482 | 5.33E-09 | 3.20E-08 |
| 3137  | G3BP2     | 3307.531279 | 0.718053978 | 0.120983 | 5.935156 | 2.94E-09 | 1.83E-08 |
| 2991  | SRP9      | 3761.247289 | 0.717661191 | 0.118755 | 6.043186 | 1.51E-09 | 9.90E-09 |
| 5728  | CAP2      | 489.1256494 | 0.717660869 | 0.162806 | 4.408072 | 1.04E-05 | 3.57E-05 |
| 1528  | ZFAND6    | 1362.132003 | 0.71744555  | 0.095429 | 7.518128 | 5.56E-14 | 7.13E-13 |
| 2950  | PDCD6IP   | 3000.309151 | 0.717158151 | 0.118141 | 6.070342 | 1.28E-09 | 8.48E-09 |
| 6904  | HMGNS     | 138.910739  | 0.717148668 | 0.185675 | 3.862395 | 0.000112 | 0.000319 |
| 9168  | GPSM2     | 356.6621205 | 0.716603881 | 0.242955 | 2.949535 | 0.003183 | 0.006804 |
| 7535  | OSBP2     | 175.8743887 | 0.716521571 | 0.19892  | 3.602057 | 0.000316 | 0.000821 |
| 7573  | EFNB2     | 1817.770869 | 0.716501912 | 0.199688 | 3.588099 | 0.000333 | 0.000862 |
| 3373  | KIAA0528  | 1094.693812 | 0.716326572 | 0.124266 | 5.764445 | 8.19E-09 | 4.76E-08 |
| 4529  | GLRX5     | 738.5272628 | 0.715875689 | 0.142628 | 5.019183 | 5.19E-07 | 2.25E-06 |
| 1457  | C9orf156  | 227.0386858 | 0.715627776 | 0.09381  | 7.628511 | 2.37E-14 | 3.19E-13 |
| 3254  | ATRX      | 1867.751644 | 0.715535618 | 0.122324 | 5.849493 | 4.93E-09 | 2.97E-08 |
| 893   | CUL3      | 1598.211452 | 0.71543783  | 0.083764 | 8.541148 | 1.33E-17 | 2.92E-16 |
| 3863  | TRNT1     | 245.3941105 | 0.715354386 | 0.131847 | 5.425651 | 5.77E-08 | 2.93E-07 |
| 4492  | FBXO33    | 345.7480442 | 0.715163367 | 0.141784 | 5.044029 | 4.56E-07 | 1.99E-06 |
| 7842  | XYLB      | 146.7475585 | 0.714832056 | 0.205519 | 3.478173 | 0.000505 | 0.001262 |
| 11402 | C10orf131 | 1.798583136 | 0.714594049 | 0.332569 | 2.14871  | 0.031657 | 0.05442  |
| 2860  | PDSS2     | 489.7390476 | 0.714529971 | 0.116435 | 6.136707 | 8.42E-10 | 5.78E-09 |

|       |          |             |             |          |          |          |          |
|-------|----------|-------------|-------------|----------|----------|----------|----------|
| 2777  | NMNAT1   | 249.7908314 | 0.714489211 | 0.114958 | 6.215244 | 5.12E-10 | 3.62E-09 |
| 3965  | METTL9   | 4223.22675  | 0.714340368 | 0.13316  | 5.364533 | 8.12E-08 | 4.01E-07 |
| 3581  | ZMPSTE24 | 2070.871674 | 0.714259065 | 0.127172 | 5.616466 | 1.95E-08 | 1.07E-07 |
| 2214  | RAB14    | 2694.145916 | 0.714001883 | 0.10591  | 6.741586 | 1.57E-11 | 1.39E-10 |
| 3803  | ZNF654   | 449.7609908 | 0.713467918 | 0.130369 | 5.472701 | 4.43E-08 | 2.28E-07 |
| 5004  | TMEM14A  | 585.5261419 | 0.713447079 | 0.149503 | 4.772128 | 1.82E-06 | 7.14E-06 |
| 11443 | SLITRK4  | 270.9055638 | 0.713095988 | 0.333817 | 2.13619  | 0.032664 | 0.055951 |
| 3547  | IER3IP1  | 1338.501871 | 0.712919129 | 0.126465 | 5.637303 | 1.73E-08 | 9.55E-08 |
| 4030  | FDFT1    | 1324.370374 | 0.712815916 | 0.134032 | 5.318252 | 1.05E-07 | 5.10E-07 |
| 5441  | ATP1B1   | 21975.35448 | 0.712794928 | 0.156789 | 4.546197 | 5.46E-06 | 1.97E-05 |
| 3251  | FMR1     | 1398.828744 | 0.712789697 | 0.121793 | 5.852456 | 4.84E-09 | 2.92E-08 |
| 2900  | ZADH2    | 732.8176402 | 0.712498141 | 0.116562 | 6.112606 | 9.80E-10 | 6.62E-09 |
| 5157  | TMED7    | 4432.596969 | 0.712442312 | 0.151661 | 4.697601 | 2.63E-06 | 1.00E-05 |
| 5147  | RIMKLB   | 781.7400669 | 0.712296393 | 0.151412 | 4.704371 | 2.55E-06 | 9.70E-06 |
| 12219 | GREB1    | 117.7753806 | 0.712072484 | 0.376514 | 1.891223 | 0.058595 | 0.093999 |
| 10583 | HOXD1    | 53.51456837 | 0.711966853 | 0.291595 | 2.441628 | 0.014621 | 0.02708  |
| 3363  | SYNJ1    | 492.6782962 | 0.711873164 | 0.123365 | 5.770455 | 7.91E-09 | 4.61E-08 |
| 4207  | LRRC58   | 1495.599328 | 0.711547201 | 0.136704 | 5.20502  | 1.94E-07 | 9.04E-07 |
| 13124 | GSTA2    | 1881.310977 | 0.711209878 | 0.443634 | 1.603144 | 0.108903 | 0.162649 |
| 3864  | SMARCA1  | 1181.054982 | 0.71081659  | 0.131013 | 5.425525 | 5.78E-08 | 2.93E-07 |
| 7763  | DENND1B  | 78.91994935 | 0.710800015 | 0.202357 | 3.512596 | 0.000444 | 0.00112  |
| 9443  | SERTAD4  | 59.74426476 | 0.709986257 | 0.249938 | 2.840647 | 0.004502 | 0.009345 |
| 10085 | CRNA0023 | 1.875462775 | 0.709976188 | 0.270616 | 2.623558 | 0.008702 | 0.016914 |
| 1425  | SCO1     | 429.8758326 | 0.709945992 | 0.092504 | 7.674773 | 1.66E-14 | 2.28E-13 |
| 10580 | NRIP3    | 74.84992547 | 0.709907062 | 0.290705 | 2.44202  | 0.014605 | 0.027059 |
| 5181  | ABLIM1   | 3164.905928 | 0.709744727 | 0.151517 | 4.684272 | 2.81E-06 | 1.06E-05 |
| 13750 | CLDN19   | 37.00544134 | 0.709606929 | 0.505981 | 1.402438 | 0.160784 | 0.229217 |
| 10810 | PLEKHB1  | 174.6697883 | 0.709495697 | 0.300804 | 2.358665 | 0.018341 | 0.033256 |
| 3117  | SFXN1    | 1457.961317 | 0.709447668 | 0.119231 | 5.950192 | 2.68E-09 | 1.68E-08 |
| 5541  | PHLDB2   | 2204.598301 | 0.709246878 | 0.157527 | 4.502396 | 6.72E-06 | 2.38E-05 |
| 944   | IKBKAP   | 873.9271081 | 0.70923715  | 0.083869 | 8.456463 | 2.76E-17 | 5.72E-16 |
| 1662  | PNRC2    | 2076.724192 | 0.709211484 | 0.096579 | 7.343296 | 2.08E-13 | 2.46E-12 |
| 2393  | CXorf23  | 262.3566657 | 0.709097127 | 0.108026 | 6.564155 | 5.23E-11 | 4.29E-10 |
| 15436 | DHX40P1  | 0.878156247 | 0.708925882 | 0.808054 | 0.877325 | 0.38031  | 0.482927 |
| 2094  | MRS2     | 721.6382986 | 0.708582127 | 0.103404 | 6.852586 | 7.25E-12 | 6.79E-11 |
| 15716 | APOF     | 0.368697429 | 0.708553644 | 0.886171 | 0.799568 | 0.423961 | 0.528765 |
| 2940  | PECI     | 1488.235967 | 0.708509382 | 0.116593 | 6.076756 | 1.23E-09 | 8.18E-09 |
| 3882  | CADPS2   | 801.675534  | 0.708502861 | 0.130881 | 5.413323 | 6.19E-08 | 3.12E-07 |
| 3833  | FBXO36   | 140.0831549 | 0.708300814 | 0.130118 | 5.443541 | 5.22E-08 | 2.67E-07 |
| 12310 | SHISA2   | 50.80334253 | 0.708218224 | 0.380504 | 1.861262 | 0.062707 | 0.099848 |
| 5471  | PCK2     | 933.6518834 | 0.708122972 | 0.156188 | 4.533773 | 5.79E-06 | 2.08E-05 |
| 2565  | NEK1     | 415.8766761 | 0.708021594 | 0.11041  | 6.41264  | 1.43E-10 | 1.09E-09 |
| 4920  | MBLAC2   | 234.5010014 | 0.708012251 | 0.146976 | 4.817197 | 1.46E-06 | 5.80E-06 |
| 6724  | SCLY     | 407.7962231 | 0.707992167 | 0.18006  | 3.931984 | 8.42E-05 | 0.000246 |
| 2071  | ITSN2    | 1521.809357 | 0.707965807 | 0.102912 | 6.879361 | 6.01E-12 | 5.69E-11 |
| 6370  | CYP51A1  | 1339.814254 | 0.70785106  | 0.172945 | 4.092923 | 4.26E-05 | 0.000131 |
| 4191  | PDK2     | 1630.755846 | 0.707822596 | 0.135729 | 5.214961 | 1.84E-07 | 8.60E-07 |



|       |           |             |             |          |          |          |          |
|-------|-----------|-------------|-------------|----------|----------|----------|----------|
| 5329  | 43898     | 287.1778451 | 0.707718146 | 0.153557 | 4.608822 | 4.05E-06 | 1.49E-05 |
| 3314  | SLC41A1   | 1199.572541 | 0.707455939 | 0.121823 | 5.807237 | 6.35E-09 | 3.76E-08 |
| 11684 | DKK1      | 15.58427759 | 0.707185201 | 0.344108 | 2.055127 | 0.039867 | 0.066879 |
| 2602  | STAM2     | 1026.574317 | 0.707062032 | 0.110822 | 6.380148 | 1.77E-10 | 1.33E-09 |
| 10283 | C5        | 159.0643992 | 0.707002616 | 0.277042 | 2.551967 | 0.010712 | 0.020418 |
| 1854  | C18orf25  | 704.6589759 | 0.706953025 | 0.099109 | 7.133094 | 9.81E-13 | 1.04E-11 |
| 5083  | GK5       | 379.6916986 | 0.706910219 | 0.149415 | 4.731177 | 2.23E-06 | 8.61E-06 |
| 9238  | SLC2A9    | 360.9428595 | 0.706845713 | 0.24177  | 2.923627 | 0.00346  | 0.007341 |
| 3394  | BMI1      | 1523.702575 | 0.706813611 | 0.122925 | 5.749963 | 8.93E-09 | 5.15E-08 |
| 2976  | FAM98B    | 293.1781736 | 0.706750237 | 0.11679  | 6.051481 | 1.44E-09 | 9.45E-09 |
| 11856 | GABRR1    | 5.028255154 | 0.706535328 | 0.352514 | 2.004278 | 0.04504  | 0.074463 |
| 2627  | CYB5D1    | 728.1259567 | 0.706489974 | 0.111206 | 6.352974 | 2.11E-10 | 1.58E-09 |
| 8958  | FN3K      | 852.1190607 | 0.706258113 | 0.233257 | 3.027808 | 0.002463 | 0.00539  |
| 2462  | RPP14     | 426.9587662 | 0.706226692 | 0.108566 | 6.50502  | 7.77E-11 | 6.18E-10 |
| 3572  | KIAA1586  | 181.069221  | 0.706166314 | 0.1256   | 5.622352 | 1.88E-08 | 1.03E-07 |
| 5054  | AADAT     | 88.45218015 | 0.706132428 | 0.148821 | 4.744828 | 2.09E-06 | 8.09E-06 |
| 9857  | MYOM3     | 773.4132384 | 0.705580625 | 0.261214 | 2.701158 | 0.00691  | 0.01374  |
| 4122  | ZNF292    | 1354.149422 | 0.705389771 | 0.133859 | 5.269654 | 1.37E-07 | 6.50E-07 |
| 3467  | RBL2      | 2384.954089 | 0.705348707 | 0.123798 | 5.697556 | 1.22E-08 | 6.87E-08 |
| 3732  | STRN3     | 789.041148  | 0.705078732 | 0.127788 | 5.517582 | 3.44E-08 | 1.80E-07 |
| 4256  | ZFYVE1    | 739.6225337 | 0.704615988 | 0.136035 | 5.179671 | 2.22E-07 | 1.02E-06 |
| 7065  | GNPNAT1   | 770.3218749 | 0.704342443 | 0.185537 | 3.796238 | 0.000147 | 0.000408 |
| 3502  | TM7SF3    | 3277.185211 | 0.703647894 | 0.124058 | 5.671934 | 1.41E-08 | 7.90E-08 |
| 10720 | DPY19L2   | 272.8961147 | 0.703403171 | 0.294378 | 2.389456 | 0.016873 | 0.030851 |
| 9886  | ZNF878    | 5.154406049 | 0.703286817 | 0.261308 | 2.691412 | 0.007115 | 0.014107 |
| 1810  | KIAA1468  | 646.8752399 | 0.703252054 | 0.097968 | 7.178362 | 7.06E-13 | 7.64E-12 |
| 10468 | ANKRD31   | 2.569257417 | 0.703121303 | 0.282794 | 2.486342 | 0.012906 | 0.024167 |
| 8010  | GRB7      | 296.1806128 | 0.702694719 | 0.206301 | 3.406158 | 0.000659 | 0.001612 |
| 4096  | BDNFOS    | 56.6443122  | 0.702595933 | 0.132982 | 5.283411 | 1.27E-07 | 6.07E-07 |
| 7514  | LMBRD2    | 240.6711669 | 0.702492626 | 0.194539 | 3.611063 | 0.000305 | 0.000795 |
| 5763  | DOCK8     | 2201.52464  | 0.702281082 | 0.160003 | 4.38918  | 1.14E-05 | 3.87E-05 |
| 3343  | EIF1AX    | 2048.889372 | 0.701876317 | 0.121195 | 5.791315 | 6.98E-09 | 4.09E-08 |
| 1918  | AASDH     | 231.1499212 | 0.701832047 | 0.099261 | 7.070592 | 1.54E-12 | 1.58E-11 |
| 1576  | PIK3C3    | 613.4595145 | 0.701746508 | 0.094076 | 7.459349 | 8.70E-14 | 1.08E-12 |
| 11699 | PNMA3     | 104.353796  | 0.70160211  | 0.341968 | 2.051658 | 0.040203 | 0.067358 |
| 5107  | MITF      | 1154.693259 | 0.701219867 | 0.148387 | 4.725606 | 2.29E-06 | 8.81E-06 |
| 4775  | FCHO2     | 1619.177077 | 0.70057513  | 0.14308  | 4.896389 | 9.76E-07 | 4.01E-06 |
| 2430  | MARCAD    | 850.6701267 | 0.700367596 | 0.107226 | 6.531705 | 6.50E-11 | 5.25E-10 |
| 3832  | MRPL42    | 888.3000861 | 0.699808744 | 0.128532 | 5.444646 | 5.19E-08 | 2.66E-07 |
| 11159 | ARL4D     | 238.3554257 | 0.6996031   | 0.31301  | 2.235084 | 0.025412 | 0.044636 |
| 15200 | OR7E37P   | 0.325532651 | 0.699540638 | 0.738257 | 0.947557 | 0.343355 | 0.44277  |
| 16222 | PAR4      | 0.209999819 | 0.699539434 | 1.078014 | 0.648915 | 0.516393 | 0.623918 |
| 16334 | LOC643923 | 0.186345191 | 0.699539176 | 1.133606 | 0.617092 | 0.537174 | 0.644615 |
| 16787 | LOC340094 | 0.191966178 | 0.699537843 | 1.419596 | 0.492773 | 0.622173 | 0.726468 |
| 16949 | OR1N2     | 0.231689139 | 0.699537259 | 1.552803 | 0.4505   | 0.65235  | 0.75442  |
| 16952 | 44086     | 0.166267786 | 0.699537047 | 1.553385 | 0.450331 | 0.652472 | 0.75443  |
| 17830 | PRHOXNB   | 0.118110757 | 0.699525035 | 2.91407  | 0.240051 | 0.810291 | 0.890775 |

|       |          |             |             |          |          |          |          |
|-------|----------|-------------|-------------|----------|----------|----------|----------|
| 2686  | MAPK1    | 5113.473381 | 0.698808596 | 0.111056 | 6.292387 | 3.13E-10 | 2.28E-09 |
| 11064 | NR2E3    | 3.898752406 | 0.69874221  | 0.30802  | 2.268495 | 0.023299 | 0.041277 |
| 5574  | GOT2     | 2739.938492 | 0.698561058 | 0.155706 | 4.486401 | 7.24E-06 | 2.55E-05 |
| 10795 | FAM95B1  | 56.44313581 | 0.698441351 | 0.295496 | 2.363626 | 0.018097 | 0.032859 |
| 5967  | C14orf33 | 39.14367432 | 0.698267646 | 0.163046 | 4.282637 | 1.85E-05 | 6.07E-05 |
| 8761  | IPCEF1   | 163.0403633 | 0.698182115 | 0.225089 | 3.101808 | 0.001923 | 0.004303 |
| 3733  | ZDHC13   | 439.405913  | 0.698081938 | 0.12652  | 5.517581 | 3.44E-08 | 1.80E-07 |
| 2996  | AKIRIN1  | 1035.456762 | 0.698042809 | 0.115693 | 6.033583 | 1.60E-09 | 1.05E-08 |
| 9575  | HOMER1   | 167.9945745 | 0.697833324 | 0.250154 | 2.789611 | 0.005277 | 0.010803 |
| 4125  | SLC25A46 | 824.3946627 | 0.697823185 | 0.132477 | 5.267491 | 1.38E-07 | 6.57E-07 |
| 5166  | TRIM44   | 1559.393669 | 0.69771577  | 0.148719 | 4.691502 | 2.71E-06 | 1.03E-05 |
| 14123 | SLC10A1  | 0.362630267 | 0.697596503 | 0.544721 | 1.280648 | 0.200317 | 0.278016 |
| 4175  | FAM177A1 | 1053.627032 | 0.697264799 | 0.133259 | 5.232405 | 1.67E-07 | 7.86E-07 |
| 5256  | MEM170E  | 331.5390911 | 0.697142353 | 0.15     | 4.647602 | 3.36E-06 | 1.25E-05 |
| 13758 | SERPINC1 | 6.236976347 | 0.6970126   | 0.497322 | 1.401531 | 0.161055 | 0.229455 |
| 11415 | GALNTL1  | 174.0340472 | 0.696988302 | 0.325165 | 2.143489 | 0.032074 | 0.055074 |
| 8343  | FAM186B  | 16.56034079 | 0.696909232 | 0.212715 | 3.276258 | 0.001052 | 0.002471 |
| 7176  | ARHGAP18 | 1690.972515 | 0.696610222 | 0.185609 | 3.753096 | 0.000175 | 0.000477 |
| 4145  | PPP2R5E  | 660.1733395 | 0.69631099  | 0.132559 | 5.252827 | 1.50E-07 | 7.08E-07 |
| 7599  | MPZL2    | 1566.688418 | 0.695916371 | 0.194398 | 3.579847 | 0.000344 | 0.000887 |
| 5706  | ZNF619   | 50.18553809 | 0.69555749  | 0.157483 | 4.416717 | 1.00E-05 | 3.44E-05 |
| 13213 | CLEC18C  | 738.4760585 | 0.695460755 | 0.441457 | 1.575377 | 0.115169 | 0.17085  |
| 3155  | ZNF765   | 220.4587048 | 0.69538325  | 0.117539 | 5.916187 | 3.29E-09 | 2.05E-08 |
| 11360 | SYCP2    | 67.1602663  | 0.695311246 | 0.321371 | 2.16358  | 0.030497 | 0.05262  |
| 7803  | FOXC1    | 415.2587344 | 0.695216842 | 0.198621 | 3.500212 | 0.000465 | 0.001168 |
| 5739  | UEVLD    | 286.8547155 | 0.694682244 | 0.157798 | 4.402338 | 1.07E-05 | 3.66E-05 |
| 3201  | C2orf24  | 3229.562543 | 0.694433642 | 0.118038 | 5.883144 | 4.03E-09 | 2.46E-08 |
| 6610  | GADD45A  | 1485.164012 | 0.694418842 | 0.174511 | 3.979217 | 6.91E-05 | 0.000205 |
| 3153  | RNF170   | 640.2213096 | 0.694296705 | 0.117348 | 5.916563 | 3.29E-09 | 2.04E-08 |
| 2606  | RNF13    | 2328.819074 | 0.694205477 | 0.108935 | 6.372644 | 1.86E-10 | 1.40E-09 |
| 1908  | OSBP     | 2365.778512 | 0.693650986 | 0.097965 | 7.080632 | 1.43E-12 | 1.47E-11 |
| 12618 | TCTE1    | 1.146510481 | 0.693452186 | 0.392447 | 1.766995 | 0.077229 | 0.119969 |
| 4229  | CNOT6L   | 1460.718012 | 0.693245099 | 0.133466 | 5.194175 | 2.06E-07 | 9.53E-07 |
| 3367  | NDFIP1   | 4567.933075 | 0.693207783 | 0.1202   | 5.767129 | 8.06E-09 | 4.69E-08 |
| 2087  | EXD2     | 583.7634575 | 0.693079313 | 0.101063 | 6.857891 | 6.99E-12 | 6.56E-11 |
| 4040  | MYLIP    | 902.2032819 | 0.692925934 | 0.130437 | 5.312326 | 1.08E-07 | 5.25E-07 |
| 3168  | NARS2    | 357.2446339 | 0.69269116  | 0.117277 | 5.906457 | 3.50E-09 | 2.16E-08 |
| 4255  | LRPPRC   | 3717.784153 | 0.692687481 | 0.133725 | 5.179953 | 2.22E-07 | 1.02E-06 |
| 10252 | ADRA2B   | 105.3928701 | 0.692177921 | 0.269895 | 2.564622 | 0.010329 | 0.019748 |
| 10015 | SDR42E1  | 110.337919  | 0.692177352 | 0.261444 | 2.647522 | 0.008108 | 0.01587  |
| 3486  | APC      | 944.2426576 | 0.691666681 | 0.121701 | 5.683326 | 1.32E-08 | 7.43E-08 |
| 7710  | PPP2R3A  | 2023.40699  | 0.691653132 | 0.195617 | 3.535744 | 0.000407 | 0.001034 |
| 3020  | SLMAP    | 857.4699528 | 0.691014647 | 0.114805 | 6.019046 | 1.75E-09 | 1.14E-08 |
| 3631  | YIPF6    | 349.5075347 | 0.690877277 | 0.12375  | 5.582857 | 2.37E-08 | 1.28E-07 |
| 5098  | ANKIB1   | 1940.80129  | 0.690810288 | 0.146109 | 4.728038 | 2.27E-06 | 8.72E-06 |
| 4617  | ACSL3    | 1594.352501 | 0.69044427  | 0.138602 | 4.981499 | 6.31E-07 | 2.68E-06 |
| 8658  | ABR      | 2055.556518 | 0.690020289 | 0.219223 | 3.147566 | 0.001646 | 0.003727 |

|       |          |             |             |          |          |          |          |
|-------|----------|-------------|-------------|----------|----------|----------|----------|
| 3754  | HMGCS1   | 1145.073235 | 0.690011069 | 0.125356 | 5.504434 | 3.70E-08 | 1.93E-07 |
| 3076  | YLPM1    | 1314.201802 | 0.689947952 | 0.115401 | 5.978704 | 2.25E-09 | 1.43E-08 |
| 4076  | CASC4    | 4396.78496  | 0.689892874 | 0.130336 | 5.293189 | 1.20E-07 | 5.78E-07 |
| 3605  | NCKAP1   | 4776.192947 | 0.689715248 | 0.123082 | 5.603703 | 2.10E-08 | 1.14E-07 |
| 3282  | ERCC4    | 286.9844356 | 0.689621666 | 0.118295 | 5.829677 | 5.55E-09 | 3.32E-08 |
| 2279  | ZNF828   | 434.9519046 | 0.689503226 | 0.103352 | 6.671432 | 2.53E-11 | 2.18E-10 |
| 3522  | EGLN1    | 3210.953021 | 0.689338278 | 0.121851 | 5.657209 | 1.54E-08 | 8.56E-08 |
| 4395  | PDCD4    | 1952.687979 | 0.689230422 | 0.134947 | 5.107401 | 3.27E-07 | 1.46E-06 |
| 5667  | LYRM7    | 661.6499531 | 0.689182476 | 0.155287 | 4.438132 | 9.07E-06 | 3.14E-05 |
| 5404  | RC3H2    | 415.4960782 | 0.689050167 | 0.151037 | 4.562127 | 5.06E-06 | 1.84E-05 |
| 5562  | MSMP     | 35.61033882 | 0.689027132 | 0.153389 | 4.49203  | 7.05E-06 | 2.49E-05 |
| 4794  | HSD17B4  | 2805.064256 | 0.688847418 | 0.140878 | 4.889689 | 1.01E-06 | 4.13E-06 |
| 6092  | TXLNG    | 172.2291435 | 0.688772587 | 0.16303  | 4.224828 | 2.39E-05 | 7.69E-05 |
| 1946  | FBXW2    | 1488.083975 | 0.688662806 | 0.097839 | 7.038759 | 1.94E-12 | 1.95E-11 |
| 1496  | PPP6C    | 1721.678461 | 0.688240397 | 0.090872 | 7.57371  | 3.63E-14 | 4.75E-13 |
| 7146  | KLF6     | 8570.670543 | 0.68812712  | 0.182752 | 3.765358 | 0.000166 | 0.000456 |
| 13084 | GCM1     | 7.008517957 | 0.688066243 | 0.425381 | 1.617528 | 0.105764 | 0.158444 |
| 3872  | AKAP11   | 1625.687754 | 0.687607334 | 0.126844 | 5.420902 | 5.93E-08 | 3.00E-07 |
| 3241  | TSTD2    | 388.5959031 | 0.687360198 | 0.117285 | 5.860575 | 4.61E-09 | 2.79E-08 |
| 8438  | LOC25845 | 624.7897328 | 0.68732017  | 0.212673 | 3.231817 | 0.00123  | 0.002857 |
| 3539  | USP46    | 365.4431618 | 0.687135768 | 0.121795 | 5.641724 | 1.68E-08 | 9.32E-08 |
| 11983 | CDH23    | 120.4380758 | 0.687048991 | 0.349744 | 1.964436 | 0.04948  | 0.080929 |
| 862   | ZBTB5    | 423.1338796 | 0.686680393 | 0.079705 | 8.615319 | 6.97E-18 | 1.59E-16 |
| 11848 | BCO2     | 52.37408454 | 0.686390652 | 0.342033 | 2.006799 | 0.044771 | 0.074068 |
| 1368  | UBE3A    | 1872.602328 | 0.686263792 | 0.088346 | 7.767915 | 7.98E-15 | 1.14E-13 |
| 1959  | PIK3R4   | 797.0557298 | 0.686179455 | 0.097704 | 7.023022 | 2.17E-12 | 2.17E-11 |
| 9343  | NOX4     | 866.8289364 | 0.685687539 | 0.238042 | 2.880529 | 0.00397  | 0.008329 |
| 4679  | NPAT     | 449.438306  | 0.685457224 | 0.138614 | 4.94507  | 7.61E-07 | 3.19E-06 |
| 8796  | C10orf41 | 66.8644518  | 0.685418372 | 0.222019 | 3.087199 | 0.002021 | 0.004503 |
| 2375  | LEMD3    | 800.516279  | 0.68519624  | 0.10405  | 6.58529  | 4.54E-11 | 3.75E-10 |
| 4359  | STAG2    | 2565.860991 | 0.684559349 | 0.133528 | 5.126712 | 2.95E-07 | 1.33E-06 |
| 4272  | KLHL15   | 318.5822979 | 0.684384016 | 0.132362 | 5.170562 | 2.33E-07 | 1.07E-06 |
| 10209 | DCDC1    | 3.595440943 | 0.683771554 | 0.265207 | 2.578252 | 0.00993  | 0.019066 |
| 8374  | KSR1     | 2351.799312 | 0.683404324 | 0.209585 | 3.260751 | 0.001111 | 0.002601 |
| 2711  | TJP1     | 2214.52615  | 0.683367544 | 0.10902  | 6.268298 | 3.65E-10 | 2.64E-09 |
| 4301  | UTP20    | 728.485909  | 0.683313852 | 0.132528 | 5.156008 | 2.52E-07 | 1.15E-06 |
| 14785 | CDKL4    | 0.750327137 | 0.68325867  | 0.637247 | 1.072203 | 0.283629 | 0.376017 |
| 7979  | AUTS2    | 854.350733  | 0.683252601 | 0.199842 | 3.41897  | 0.000629 | 0.001544 |
| 4622  | PCMTD1   | 1744.441995 | 0.683179494 | 0.137195 | 4.979617 | 6.37E-07 | 2.70E-06 |
| 1219  | SCFD1    | 944.4785481 | 0.683177551 | 0.085436 | 7.996398 | 1.28E-15 | 2.06E-14 |
| 4883  | CROT     | 440.9457699 | 0.682904677 | 0.141165 | 4.837649 | 1.31E-06 | 5.27E-06 |
| 10393 | NR2F1    | 332.3334784 | 0.682793069 | 0.272045 | 2.509857 | 0.012078 | 0.022779 |
| 2746  | AKAP1    | 1188.344339 | 0.682780009 | 0.109396 | 6.241349 | 4.34E-10 | 3.10E-09 |
| 6570  | LYPLA1   | 1629.391163 | 0.682430152 | 0.170839 | 3.994575 | 6.48E-05 | 0.000193 |
| 10897 | F8       | 2295.565496 | 0.682263961 | 0.293834 | 2.321938 | 0.020236 | 0.0364   |
| 5652  | MIB1     | 1244.712288 | 0.682240278 | 0.153435 | 4.446437 | 8.73E-06 | 3.03E-05 |
| 2963  | AFF1     | 4080.391979 | 0.681887218 | 0.112501 | 6.061159 | 1.35E-09 | 8.94E-09 |

|       |           |             |             |          |          |          |          |
|-------|-----------|-------------|-------------|----------|----------|----------|----------|
| 4653  | TUBE1     | 240.8717256 | 0.681850504 | 0.137484 | 4.959472 | 7.07E-07 | 2.98E-06 |
| 6136  | FAM45B    | 180.1431483 | 0.681749535 | 0.162101 | 4.205713 | 2.60E-05 | 8.31E-05 |
| 12275 | LRRC43    | 15.38637486 | 0.681719114 | 0.363849 | 1.873629 | 0.060982 | 0.097377 |
| 8531  | TAOK1     | 413.3478218 | 0.681692259 | 0.213351 | 3.19517  | 0.001397 | 0.003211 |
| 6659  | JUB       | 838.2263065 | 0.68145163  | 0.172135 | 3.958814 | 7.53E-05 | 0.000222 |
| 7234  | SLC30A1   | 396.1483705 | 0.681396982 | 0.182606 | 3.731506 | 0.00019  | 0.000516 |
| 2044  | ACVR2A    | 345.5830711 | 0.681079009 | 0.09848  | 6.915946 | 4.65E-12 | 4.46E-11 |
| 4847  | GNG12     | 4277.48986  | 0.68090733  | 0.139902 | 4.867045 | 1.13E-06 | 4.58E-06 |
| 10290 | WBSCR27   | 131.479984  | 0.680602759 | 0.266901 | 2.550017 | 0.010772 | 0.020519 |
| 1773  | SIK3      | 842.9676677 | 0.680113908 | 0.094228 | 7.217771 | 5.28E-13 | 5.84E-12 |
| 5112  | C2orf69   | 455.3861958 | 0.680082066 | 0.144027 | 4.721901 | 2.34E-06 | 8.96E-06 |
| 6270  | ARAP2     | 496.5296054 | 0.680053669 | 0.163979 | 4.147209 | 3.37E-05 | 0.000105 |
| 10128 | LRRC55    | 13.02023952 | 0.679761385 | 0.260863 | 2.605814 | 0.009166 | 0.017738 |
| 10886 | PLEK2     | 287.0480649 | 0.679199657 | 0.292059 | 2.325557 | 0.020042 | 0.036087 |
| 3885  | PLD1      | 794.9510851 | 0.679153289 | 0.125479 | 5.412486 | 6.22E-08 | 3.14E-07 |
| 3100  | ORC4L     | 693.1481209 | 0.678745584 | 0.113822 | 5.963232 | 2.47E-09 | 1.56E-08 |
| 6366  | RORA      | 1097.510426 | 0.678455365 | 0.165674 | 4.095124 | 4.22E-05 | 0.00013  |
| 5588  | ZNF121    | 62.56278215 | 0.678370225 | 0.151435 | 4.479602 | 7.48E-06 | 2.62E-05 |
| 11263 | A4GNT     | 11.31423252 | 0.678303412 | 0.309206 | 2.193694 | 0.028257 | 0.049176 |
| 3860  | TP53INP2  | 2697.890003 | 0.678285248 | 0.124989 | 5.426754 | 5.74E-08 | 2.91E-07 |
| 5401  | ZNF525    | 242.7011655 | 0.678165602 | 0.148537 | 4.565642 | 4.98E-06 | 1.81E-05 |
| 2276  | C2orf47   | 356.0906096 | 0.677689117 | 0.101552 | 6.673327 | 2.50E-11 | 2.15E-10 |
| 11553 | UGT2B7    | 2933.559751 | 0.677521833 | 0.32309  | 2.097004 | 0.035993 | 0.061067 |
| 4889  | KIF16B    | 592.7096465 | 0.677483095 | 0.140165 | 4.833457 | 1.34E-06 | 5.38E-06 |
| 4786  | EPB41L4A  | 1484.842386 | 0.677399128 | 0.13846  | 4.892389 | 9.96E-07 | 4.08E-06 |
| 1873  | TMLHE     | 273.2711457 | 0.677297113 | 0.095158 | 7.117633 | 1.10E-12 | 1.15E-11 |
| 4038  | RNF11     | 2974.590179 | 0.676780371 | 0.12738  | 5.313079 | 1.08E-07 | 5.23E-07 |
| 7277  | WWC1      | 2292.832955 | 0.676246818 | 0.182264 | 3.710252 | 0.000207 | 0.000558 |
| 10360 | NNAT      | 7.36853923  | 0.675419622 | 0.267743 | 2.522637 | 0.011648 | 0.022038 |
| 9767  | FSIP1     | 22.22733945 | 0.675329911 | 0.247789 | 2.725426 | 0.006422 | 0.012885 |
| 7004  | TIGD2     | 149.5979518 | 0.675176666 | 0.176651 | 3.822097 | 0.000132 | 0.00037  |
| 3448  | SH3RF1    | 673.3615896 | 0.675070458 | 0.118254 | 5.708631 | 1.14E-08 | 6.47E-08 |
| 957   | HNRNPH2   | 2294.124667 | 0.674901816 | 0.080031 | 8.432994 | 3.37E-17 | 6.90E-16 |
| 2166  | SPIN1     | 2658.516488 | 0.674814138 | 0.099292 | 6.796237 | 1.07E-11 | 9.72E-11 |
| 3414  | ABHD13    | 489.9826948 | 0.674371004 | 0.117527 | 5.738003 | 9.58E-09 | 5.50E-08 |
| 4609  | YTHDF3    | 2284.711234 | 0.674137153 | 0.135252 | 4.984311 | 6.22E-07 | 2.64E-06 |
| 15658 | IP1-177G6 | 0.521672037 | 0.673883105 | 0.822108 | 0.819701 | 0.412386 | 0.516234 |
| 2868  | OPA1      | 1737.896734 | 0.673682262 | 0.1099   | 6.129964 | 8.79E-10 | 6.01E-09 |
| 2979  | NAA16     | 244.6254313 | 0.672917026 | 0.111223 | 6.050161 | 1.45E-09 | 9.52E-09 |
| 11097 | CLEC9A    | 19.65322864 | 0.672795179 | 0.298219 | 2.256045 | 0.024068 | 0.042512 |
| 10326 | CYP26B1   | 130.4950686 | 0.672677792 | 0.265088 | 2.537566 | 0.011163 | 0.021187 |
| 15846 | IM6-TRIM  | 2.33977795  | 0.672468109 | 0.884585 | 0.760208 | 0.447131 | 0.553086 |
| 6387  | AMOTL1    | 1390.945642 | 0.672208194 | 0.16465  | 4.082654 | 4.45E-05 | 0.000137 |
| 2551  | ZNF585B   | 100.6821674 | 0.671995681 | 0.104582 | 6.425557 | 1.31E-10 | 1.01E-09 |
| 2360  | MRPL44    | 778.2785026 | 0.671887968 | 0.101834 | 6.597851 | 4.17E-11 | 3.46E-10 |
| 3788  | SCP2      | 3931.523161 | 0.671682006 | 0.122566 | 5.48017  | 4.25E-08 | 2.20E-07 |
| 5050  | ZNF443    | 86.33253099 | 0.671613048 | 0.141515 | 4.745876 | 2.08E-06 | 8.06E-06 |

|       |           |             |             |          |          |          |          |
|-------|-----------|-------------|-------------|----------|----------|----------|----------|
| 11694 | ARG2      | 1403.823741 | 0.671144803 | 0.326957 | 2.052697 | 0.040102 | 0.067217 |
| 9616  | FOXF1     | 135.2370736 | 0.671094991 | 0.241905 | 2.774209 | 0.005534 | 0.01128  |
| 14570 | FLJ45983  | 1.570480838 | 0.670789489 | 0.585621 | 1.145433 | 0.25203  | 0.339055 |
| 6142  | TMEM129   | 1303.746781 | 0.670722327 | 0.15953  | 4.204377 | 2.62E-05 | 8.35E-05 |
| 2400  | RG9MTD1   | 426.5064274 | 0.670675349 | 0.102239 | 6.55989  | 5.38E-11 | 4.40E-10 |
| 5849  | C3orf33   | 152.6430969 | 0.670649734 | 0.154275 | 4.347117 | 1.38E-05 | 4.62E-05 |
| 13796 | LOC339535 | 271.2210772 | 0.670578626 | 0.483306 | 1.387482 | 0.165295 | 0.234829 |
| 1995  | SMAD4     | 1721.730016 | 0.670527257 | 0.096228 | 6.968078 | 3.21E-12 | 3.16E-11 |
| 11570 | C6orf142  | 26.45763614 | 0.670202075 | 0.320299 | 2.092424 | 0.036401 | 0.061667 |
| 8812  | C6orf195  | 3.255874562 | 0.669518524 | 0.217123 | 3.083593 | 0.002045 | 0.004549 |
| 6141  | ARL5A     | 1448.649773 | 0.66947578  | 0.159213 | 4.204916 | 2.61E-05 | 8.34E-05 |
| 6544  | BCL7A     | 513.6845356 | 0.669461778 | 0.167062 | 4.007256 | 6.14E-05 | 0.000184 |
| 12044 | CXCL10    | 926.3305371 | 0.669365009 | 0.344038 | 1.945613 | 0.051701 | 0.084139 |
| 2502  | COX18     | 419.5563103 | 0.66894373  | 0.103577 | 6.458441 | 1.06E-10 | 8.29E-10 |
| 16470 | PSG5      | 1.302327476 | 0.668767908 | 1.149728 | 0.581675 | 0.560786 | 0.667393 |
| 8005  | RIF1      | 837.9064262 | 0.668574773 | 0.1962   | 3.407627 | 0.000655 | 0.001605 |
| 1821  | ZNF527    | 124.3414382 | 0.668267097 | 0.093175 | 7.172136 | 7.38E-13 | 7.95E-12 |
| 6670  | GSR       | 1246.923373 | 0.667936777 | 0.168911 | 3.954368 | 7.67E-05 | 0.000226 |
| 2127  | ARPP19    | 4259.232979 | 0.667859089 | 0.097871 | 6.823894 | 8.86E-12 | 8.16E-11 |
| 4026  | PIGO      | 890.8174617 | 0.667854332 | 0.12543  | 5.324534 | 1.01E-07 | 4.93E-07 |
| 5143  | TMEM17    | 87.13244086 | 0.667842751 | 0.141889 | 4.706806 | 2.52E-06 | 9.59E-06 |
| 5110  | ZNF124    | 71.95700371 | 0.667787719 | 0.14139  | 4.723017 | 2.32E-06 | 8.91E-06 |
| 2985  | MUL1      | 954.6030441 | 0.667228228 | 0.110341 | 6.046942 | 1.48E-09 | 9.69E-09 |
| 1434  | GIGYF2    | 1916.635953 | 0.667035528 | 0.087083 | 7.659797 | 1.86E-14 | 2.55E-13 |
| 4615  | ZNF773    | 109.2092315 | 0.666963449 | 0.133876 | 4.981951 | 6.29E-07 | 2.67E-06 |
| 5719  | LIN52     | 113.498167  | 0.666934459 | 0.151216 | 4.410461 | 1.03E-05 | 3.54E-05 |
| 6338  | SREBF2    | 2086.50153  | 0.66674979  | 0.162263 | 4.109059 | 3.97E-05 | 0.000123 |
| 910   | ZC3H14    | 1002.698862 | 0.666638593 | 0.078391 | 8.504061 | 1.83E-17 | 3.94E-16 |
| 4078  | SRFBP1    | 273.5006949 | 0.666607424 | 0.125961 | 5.29218  | 1.21E-07 | 5.81E-07 |
| 3370  | CDC40     | 651.9955504 | 0.666530331 | 0.115579 | 5.766865 | 8.08E-09 | 4.70E-08 |
| 3194  | NDUFB6    | 838.8105349 | 0.666454134 | 0.113213 | 5.886713 | 3.94E-09 | 2.42E-08 |
| 7359  | C9orf43   | 9.437977944 | 0.666093181 | 0.181299 | 3.67401  | 0.000239 | 0.000636 |
| 13830 | MUM1L1    | 95.12122615 | 0.66599346  | 0.484406 | 1.374865 | 0.169173 | 0.239766 |
| 1694  | JKAMP     | 978.0589908 | 0.665835668 | 0.091189 | 7.30175  | 2.84E-13 | 3.29E-12 |
| 7722  | MAGI2     | 255.0219944 | 0.665595374 | 0.188455 | 3.531853 | 0.000413 | 0.001047 |
| 2250  | SPG11     | 1698.401335 | 0.665450475 | 0.099367 | 6.696917 | 2.13E-11 | 1.85E-10 |
| 12494 | LDHAL6A   | 1.774844648 | 0.665414053 | 0.368431 | 1.806077 | 0.070906 | 0.11124  |
| 3378  | NF1       | 2057.92994  | 0.665268676 | 0.11548  | 5.76092  | 8.37E-09 | 4.85E-08 |
| 4263  | CPNE3     | 2986.51232  | 0.665121781 | 0.128527 | 5.174967 | 2.28E-07 | 1.05E-06 |
| 5277  | PCCB      | 1210.07344  | 0.664971123 | 0.143375 | 4.637984 | 3.52E-06 | 1.31E-05 |
| 5235  | ENDOD1    | 2382.53965  | 0.664824337 | 0.142706 | 4.658714 | 3.18E-06 | 1.19E-05 |
| 4869  | PEBP1     | 11050.62034 | 0.664751888 | 0.137007 | 4.85194  | 1.22E-06 | 4.92E-06 |
| 2733  | 43895     | 820.5482219 | 0.664553456 | 0.106257 | 6.254235 | 3.99E-10 | 2.86E-09 |
| 5221  | IMPA1     | 614.5675113 | 0.664493924 | 0.142313 | 4.669245 | 3.02E-06 | 1.13E-05 |
| 1351  | SRP54     | 1111.173713 | 0.664441749 | 0.085205 | 7.79815  | 6.28E-15 | 9.11E-14 |
| 10022 | PCDHGA8   | 13.25962859 | 0.664251673 | 0.251174 | 2.64459  | 0.008179 | 0.015996 |
| 10113 | DPY19L2P  | 143.1405992 | 0.664065556 | 0.254171 | 2.612676 | 0.008984 | 0.017412 |

|       |           |             |             |          |          |          |          |
|-------|-----------|-------------|-------------|----------|----------|----------|----------|
| 8155  | SSX2IP    | 719.1775262 | 0.663883668 | 0.19825  | 3.348712 | 0.000812 | 0.001951 |
| 6437  | ZNF284    | 38.35458588 | 0.663735796 | 0.163691 | 4.054808 | 5.02E-05 | 0.000153 |
| 12510 | EYA4      | 41.22862581 | 0.663583941 | 0.368527 | 1.800638 | 0.07176  | 0.112435 |
| 4483  | KIAA1430  | 1295.947559 | 0.663307155 | 0.131383 | 5.04864  | 4.45E-07 | 1.95E-06 |
| 1305  | TBCK      | 518.7749116 | 0.663231394 | 0.084433 | 7.855163 | 3.99E-15 | 6.00E-14 |
| 4657  | KBTD4     | 369.0443455 | 0.663057448 | 0.13378  | 4.956327 | 7.18E-07 | 3.02E-06 |
| 8076  | ZNF135    | 129.9936061 | 0.662629613 | 0.195965 | 3.381361 | 0.000721 | 0.001751 |
| 2161  | TTC8      | 278.9753644 | 0.662523073 | 0.097436 | 6.799554 | 1.05E-11 | 9.52E-11 |
| 3543  | PDIK1L    | 251.705032  | 0.662501204 | 0.117456 | 5.640424 | 1.70E-08 | 9.38E-08 |
| 5683  | ZNF347    | 126.5919778 | 0.662474832 | 0.149576 | 4.429029 | 9.47E-06 | 3.26E-05 |
| 10292 | MTL5      | 95.83129841 | 0.66238875  | 0.259884 | 2.548785 | 0.01081  | 0.020587 |
| 3719  | TAX1BP1   | 3806.036997 | 0.662349267 | 0.119871 | 5.525521 | 3.29E-08 | 1.73E-07 |
| 6830  | H1FO      | 2611.930283 | 0.66233026  | 0.170355 | 3.887942 | 0.000101 | 0.00029  |
| 6242  | MAN1A2    | 838.5608978 | 0.662211507 | 0.159256 | 4.158154 | 3.21E-05 | 0.000101 |
| 3647  | APPL1     | 1221.574514 | 0.662095752 | 0.118785 | 5.573915 | 2.49E-08 | 1.34E-07 |
| 2620  | VPS4B     | 1186.303317 | 0.661997528 | 0.104131 | 6.357347 | 2.05E-10 | 1.54E-09 |
| 2136  | FEM1B     | 1704.139207 | 0.66190361  | 0.097055 | 6.81988  | 9.11E-12 | 8.36E-11 |
| 5904  | RRAS2     | 583.3404022 | 0.661874399 | 0.153202 | 4.320268 | 1.56E-05 | 5.17E-05 |
| 3663  | PRKAA1    | 2188.650393 | 0.661814436 | 0.119013 | 5.560843 | 2.68E-08 | 1.44E-07 |
| 4826  | VPS13C    | 1909.271524 | 0.661796127 | 0.135692 | 4.877182 | 1.08E-06 | 4.37E-06 |
| 9416  | QRICH2    | 41.61041352 | 0.661771492 | 0.232025 | 2.85216  | 0.004342 | 0.009039 |
| 12339 | KRT7      | 155.1098938 | 0.661572178 | 0.357132 | 1.852461 | 0.06396  | 0.101603 |
| 1546  | WDR11     | 1200.225473 | 0.661528704 | 0.08825  | 7.496057 | 6.58E-14 | 8.34E-13 |
| 2655  | RAB3GAP2  | 1176.387129 | 0.66125698  | 0.104588 | 6.322521 | 2.57E-10 | 1.90E-09 |
| 3919  | ZNF606    | 266.1068124 | 0.661176305 | 0.12265  | 5.390747 | 7.02E-08 | 3.51E-07 |
| 1961  | GNB5      | 709.8931998 | 0.661048322 | 0.094187 | 7.018501 | 2.24E-12 | 2.24E-11 |
| 2974  | 44085     | 3636.801175 | 0.660967748 | 0.109209 | 6.052332 | 1.43E-09 | 9.41E-09 |
| 5531  | PRKACB    | 1582.185504 | 0.660805368 | 0.146686 | 4.504883 | 6.64E-06 | 2.35E-05 |
| 6246  | ZNF827    | 218.726264  | 0.660789244 | 0.158985 | 4.156299 | 3.23E-05 | 0.000102 |
| 3335  | SOCS6     | 745.1546179 | 0.660680271 | 0.114018 | 5.794507 | 6.85E-09 | 4.03E-08 |
| 7662  | FRY       | 799.5698452 | 0.66047288  | 0.18585  | 3.553793 | 0.00038  | 0.000971 |
| 3713  | ZNF564    | 285.3366089 | 0.66027387  | 0.119404 | 5.529765 | 3.21E-08 | 1.69E-07 |
| 4163  | FPGT      | 509.0371097 | 0.660157982 | 0.125951 | 5.241384 | 1.59E-07 | 7.50E-07 |
| 2874  | RC3H1     | 800.1301421 | 0.660107446 | 0.107758 | 6.125841 | 9.02E-10 | 6.15E-09 |
| 1617  | WBP4      | 351.1604609 | 0.659194566 | 0.089024 | 7.404691 | 1.31E-13 | 1.59E-12 |
| 2535  | ARFIP1    | 876.3735866 | 0.659164024 | 0.102455 | 6.433669 | 1.25E-10 | 9.63E-10 |
| 5109  | C5orf24   | 2151.294776 | 0.658975266 | 0.139467 | 4.72494  | 2.30E-06 | 8.83E-06 |
| 5287  | COMMD1C   | 595.7026351 | 0.658868059 | 0.142323 | 4.629378 | 3.67E-06 | 1.36E-05 |
| 6640  | DYNLT3    | 1121.811491 | 0.65886278  | 0.166076 | 3.967226 | 7.27E-05 | 0.000215 |
| 4288  | NCOA4     | 6184.70258  | 0.658499806 | 0.127584 | 5.161319 | 2.45E-07 | 1.12E-06 |
| 11830 | MASP1     | 943.1299523 | 0.658024425 | 0.327048 | 2.012013 | 0.044219 | 0.073265 |
| 9367  | ELTD1     | 2167.163034 | 0.657826613 | 0.228917 | 2.873648 | 0.004058 | 0.00849  |
| 6814  | KIAA1614  | 137.937657  | 0.657778374 | 0.168949 | 3.893349 | 9.89E-05 | 0.000284 |
| 10754 | FMN1      | 50.96114971 | 0.657625045 | 0.276333 | 2.379825 | 0.017321 | 0.03157  |
| 5520  | OC1002893 | 60.09691607 | 0.657616261 | 0.145742 | 4.512189 | 6.42E-06 | 2.28E-05 |
| 11138 | C3orf36   | 41.0429804  | 0.657403118 | 0.293456 | 2.240211 | 0.025077 | 0.044132 |
| 4217  | POLR3B    | 230.1359325 | 0.657233394 | 0.126381 | 5.200424 | 1.99E-07 | 9.24E-07 |

|       |          |             |             |          |          |          |          |
|-------|----------|-------------|-------------|----------|----------|----------|----------|
| 5001  | KIAA0776 | 1252.060134 | 0.657088821 | 0.137654 | 4.773482 | 1.81E-06 | 7.10E-06 |
| 5330  | CASKIN2  | 1004.267731 | 0.656902049 | 0.142542 | 4.608487 | 4.06E-06 | 1.49E-05 |
| 6004  | BRAF     | 181.6619549 | 0.656753151 | 0.153993 | 4.264834 | 2.00E-05 | 6.53E-05 |
| 13927 | PGA3     | 27.61646218 | 0.656696409 | 0.489493 | 1.341584 | 0.179731 | 0.252955 |
| 6834  | C10orf72 | 808.5954856 | 0.656682824 | 0.168967 | 3.886467 | 0.000102 | 0.000292 |
| 3761  | BRPF3    | 1084.573928 | 0.656618075 | 0.119393 | 5.499635 | 3.81E-08 | 1.98E-07 |
| 5834  | MOSPD1   | 346.5766073 | 0.65643726  | 0.150747 | 4.354564 | 1.33E-05 | 4.48E-05 |
| 5445  | DHRS4L2  | 436.3819388 | 0.656427149 | 0.144444 | 4.54452  | 5.51E-06 | 1.98E-05 |
| 5923  | GOLIM4   | 1369.079439 | 0.656289217 | 0.152203 | 4.311926 | 1.62E-05 | 5.36E-05 |
| 4557  | TTC33    | 644.4854671 | 0.656078794 | 0.13107  | 5.005577 | 5.57E-07 | 2.40E-06 |
| 1827  | LRRC57   | 262.0277196 | 0.655869566 | 0.09153  | 7.165656 | 7.74E-13 | 8.31E-12 |
| 4022  | TSNAX    | 1051.468903 | 0.655811079 | 0.123098 | 5.327567 | 9.95E-08 | 4.85E-07 |
| 8356  | LRRC34   | 76.04847302 | 0.6558082   | 0.200542 | 3.270182 | 0.001075 | 0.002521 |
| 3822  | ZNF484   | 98.76943203 | 0.655703665 | 0.12022  | 5.454218 | 4.92E-08 | 2.52E-07 |
| 10053 | C14orf64 | 96.45724205 | 0.655690152 | 0.248889 | 2.634464 | 0.008427 | 0.016431 |
| 11732 | LRRC16B  | 35.52003086 | 0.655542063 | 0.320958 | 2.042454 | 0.041106 | 0.068678 |
| 2195  | NARG2    | 849.1515896 | 0.655453357 | 0.096945 | 6.761116 | 1.37E-11 | 1.22E-10 |
| 5042  | CD164    | 8857.554074 | 0.655164665 | 0.137871 | 4.752006 | 2.01E-06 | 7.83E-06 |
| 3477  | ASH1L    | 1597.98067  | 0.65514731  | 0.115134 | 5.690288 | 1.27E-08 | 7.15E-08 |
| 4224  | FUT10    | 110.802425  | 0.654970553 | 0.126022 | 5.197286 | 2.02E-07 | 9.38E-07 |
| 3405  | IBTK     | 1592.606865 | 0.654711148 | 0.113999 | 5.743114 | 9.30E-09 | 5.35E-08 |
| 5839  | PAQR3    | 325.7435452 | 0.654076468 | 0.150266 | 4.352803 | 1.34E-05 | 4.51E-05 |
| 13498 | IL20RA   | 6.778878049 | 0.653947222 | 0.439115 | 1.48924  | 0.136424 | 0.198109 |
| 3551  | ZNF480   | 459.1955439 | 0.653943804 | 0.116052 | 5.634905 | 1.75E-08 | 9.67E-08 |
| 3193  | BPNT1    | 552.202168  | 0.65356889  | 0.111004 | 5.887771 | 3.91E-09 | 2.40E-08 |
| 13265 | KLHL4    | 217.292944  | 0.653503191 | 0.419397 | 1.558198 | 0.119186 | 0.176115 |
| 6049  | HIBADH   | 2408.775188 | 0.653338705 | 0.153992 | 4.242684 | 2.21E-05 | 7.16E-05 |
| 12267 | ADAMTSL  | 162.472385  | 0.653194583 | 0.347809 | 1.878025 | 0.060378 | 0.096465 |
| 2642  | MRPL49   | 1362.167027 | 0.652828526 | 0.10312  | 6.330786 | 2.44E-10 | 1.81E-09 |
| 3738  | MED13    | 1780.950102 | 0.652700628 | 0.118382 | 5.513498 | 3.52E-08 | 1.84E-07 |
| 3727  | PIP4K2C  | 1014.270731 | 0.652441821 | 0.118161 | 5.521612 | 3.36E-08 | 1.77E-07 |
| 3548  | STAU2    | 886.4684635 | 0.65237197  | 0.115728 | 5.637105 | 1.73E-08 | 9.55E-08 |
| 5518  | PTP4A1   | 3642.488394 | 0.651896696 | 0.144463 | 4.512557 | 6.41E-06 | 2.28E-05 |
| 12519 | BCAN     | 36.68300045 | 0.651722475 | 0.3624   | 1.79835  | 0.072122 | 0.112921 |
| 8912  | TSSK4    | 13.33985599 | 0.651715708 | 0.21386  | 3.047393 | 0.002308 | 0.005077 |
| 1846  | DUSP3    | 3361.646245 | 0.651555868 | 0.0912   | 7.144274 | 9.05E-13 | 9.61E-12 |
| 8833  | WDR78    | 134.9443524 | 0.651448399 | 0.21171  | 3.07708  | 0.00209  | 0.004639 |
| 7912  | LRMP     | 403.2219042 | 0.651410534 | 0.18914  | 3.444073 | 0.000573 | 0.00142  |
| 4088  | LZTFL1   | 517.1712274 | 0.651266449 | 0.123161 | 5.287922 | 1.24E-07 | 5.93E-07 |
| 3130  | MID2     | 462.5659211 | 0.651247616 | 0.109615 | 5.941221 | 2.83E-09 | 1.77E-08 |
| 2728  | IPPK     | 257.3707111 | 0.651007463 | 0.104058 | 6.256226 | 3.94E-10 | 2.83E-09 |
| 4650  | PCYOX1   | 3893.43571  | 0.650933163 | 0.131223 | 4.960493 | 7.03E-07 | 2.96E-06 |
| 9467  | MAN1A1   | 2171.881482 | 0.650919921 | 0.229882 | 2.831542 | 0.004632 | 0.009592 |
| 5174  | RNF160   | 810.5587082 | 0.650822169 | 0.13881  | 4.68858  | 2.75E-06 | 1.04E-05 |
| 4606  | DIRC2    | 365.6489654 | 0.650760323 | 0.130501 | 4.98665  | 6.14E-07 | 2.61E-06 |
| 5628  | GTF2I    | 2653.438787 | 0.650685495 | 0.145993 | 4.456968 | 8.31E-06 | 2.90E-05 |
| 6284  | PLD6     | 125.7910429 | 0.650455887 | 0.15718  | 4.138298 | 3.50E-05 | 0.000109 |

|       |          |             |             |          |          |          |          |
|-------|----------|-------------|-------------|----------|----------|----------|----------|
| 8164  | ZNF503   | 403.3423913 | 0.650419197 | 0.194343 | 3.346754 | 0.000818 | 0.001963 |
| 11666 | IL17RB   | 463.2176901 | 0.650196435 | 0.315896 | 2.058259 | 0.039565 | 0.066477 |
| 3696  | PAPD5    | 488.920244  | 0.650144124 | 0.117421 | 5.536885 | 3.08E-08 | 1.63E-07 |
| 4716  | ABCB10   | 545.7321227 | 0.650072929 | 0.132016 | 4.924185 | 8.47E-07 | 3.52E-06 |
| 6646  | C21orf91 | 414.0664188 | 0.649935212 | 0.163904 | 3.965344 | 7.33E-05 | 0.000216 |
| 4963  | PKD2     | 2478.94692  | 0.649857646 | 0.135649 | 4.790732 | 1.66E-06 | 6.56E-06 |
| 6222  | PAR6G    | 249.6444237 | 0.649813192 | 0.155887 | 4.168493 | 3.07E-05 | 9.66E-05 |
| 1993  | PAFAH2   | 541.3673874 | 0.649158111 | 0.093106 | 6.972265 | 3.12E-12 | 3.07E-11 |
| 12960 | NKRD20A  | 3.04425071  | 0.648915056 | 0.392257 | 1.654312 | 0.098064 | 0.148314 |
| 3396  | ZNF720   | 278.5880312 | 0.648863197 | 0.11285  | 5.749781 | 8.94E-09 | 5.16E-08 |
| 15286 | LIPJ     | 0.40862788  | 0.648797239 | 0.701844 | 0.924418 | 0.355269 | 0.455556 |
| 3312  | RSF1     | 676.9324622 | 0.64875709  | 0.111683 | 5.808919 | 6.29E-09 | 3.72E-08 |
| 7188  | ISPD     | 114.2442172 | 0.648745915 | 0.173029 | 3.749341 | 0.000177 | 0.000483 |
| 1380  | MRPS31   | 329.4659702 | 0.648669566 | 0.08373  | 7.747195 | 9.39E-15 | 1.33E-13 |
| 5226  | EIF4E3   | 937.6272914 | 0.648646937 | 0.139008 | 4.666264 | 3.07E-06 | 1.15E-05 |
| 8592  | UGCG     | 587.3715274 | 0.648587211 | 0.204209 | 3.176089 | 0.001493 | 0.003405 |
| 10086 | TRPV4    | 600.9440164 | 0.648467521 | 0.247242 | 2.622809 | 0.008721 | 0.016948 |
| 8901  | GPR137C  | 40.38694948 | 0.648445462 | 0.212501 | 3.051495 | 0.002277 | 0.005014 |
| 4836  | ZNF287   | 123.3466733 | 0.648329905 | 0.133087 | 4.871482 | 1.11E-06 | 4.49E-06 |
| 8925  | S1PR1    | 1752.151578 | 0.648071621 | 0.213027 | 3.042204 | 0.002349 | 0.005157 |
| 3492  | C18orf19 | 595.9290788 | 0.647660751 | 0.114    | 5.681232 | 1.34E-08 | 7.51E-08 |
| 3900  | BLZF1    | 615.4890341 | 0.647518592 | 0.11983  | 5.403647 | 6.53E-08 | 3.28E-07 |
| 5283  | ZNF33B   | 1201.348735 | 0.647283858 | 0.139664 | 4.634576 | 3.58E-06 | 1.33E-05 |
| 7626  | CBWD3    | 211.8395059 | 0.646963977 | 0.181298 | 3.568515 | 0.000359 | 0.000923 |
| 2930  | FRS2     | 734.1109935 | 0.646886879 | 0.106259 | 6.087821 | 1.14E-09 | 7.66E-09 |
| 9469  | MATN2    | 974.4854232 | 0.64673601  | 0.228446 | 2.831024 | 0.00464  | 0.009605 |
| 4687  | OTUD6B   | 255.7670043 | 0.646657585 | 0.131023 | 4.935444 | 8.00E-07 | 3.34E-06 |
| 2898  | ZFP14    | 228.4084997 | 0.646650446 | 0.105778 | 6.113259 | 9.76E-10 | 6.60E-09 |
| 8668  | TMEM47   | 2040.463157 | 0.64656397  | 0.205594 | 3.144863 | 0.001662 | 0.003758 |
| 7289  | PLAGL2   | 574.4545655 | 0.646263397 | 0.174498 | 3.703555 | 0.000213 | 0.000572 |
| 2501  | TRIM13   | 886.3998829 | 0.646092871 | 0.100021 | 6.459565 | 1.05E-10 | 8.23E-10 |
| 2621  | EID1     | 4810.440929 | 0.645805207 | 0.101592 | 6.356869 | 2.06E-10 | 1.54E-09 |
| 11831 | RGS7BP   | 64.83675875 | 0.645768615 | 0.321084 | 2.011216 | 0.044303 | 0.073398 |
| 4530  | RAD50    | 1611.381643 | 0.645758762 | 0.128673 | 5.018612 | 5.20E-07 | 2.25E-06 |
| 1566  | USP33    | 1470.623565 | 0.645641879 | 0.086395 | 7.473141 | 7.83E-14 | 9.80E-13 |
| 5674  | GABPA    | 939.1217269 | 0.645193339 | 0.145463 | 4.435456 | 9.19E-06 | 3.17E-05 |
| 7193  | TMEM106A | 389.2008485 | 0.644795768 | 0.172013 | 3.748527 | 0.000178 | 0.000485 |
| 11228 | BARX2    | 804.9426101 | 0.644793408 | 0.291844 | 2.209376 | 0.027148 | 0.047394 |
| 10829 | CELF6    | 124.8780765 | 0.644446116 | 0.274045 | 2.351604 | 0.018693 | 0.033835 |
| 4561  | FAM35A   | 863.5699045 | 0.644439254 | 0.128792 | 5.003704 | 5.62E-07 | 2.42E-06 |
| 14235 | CLGN     | 126.5563889 | 0.644303007 | 0.516957 | 1.246338 | 0.21264  | 0.292797 |
| 4569  | GNAQ     | 2466.046439 | 0.644037133 | 0.128824 | 4.999367 | 5.75E-07 | 2.47E-06 |
| 4501  | LANCL1   | 1802.922371 | 0.643929055 | 0.127805 | 5.038384 | 4.69E-07 | 2.04E-06 |
| 11441 | TARP     | 31.4701207  | 0.643915758 | 0.301403 | 2.136393 | 0.032647 | 0.055932 |
| 2538  | CCDC25   | 869.3228789 | 0.643912425 | 0.100102 | 6.432541 | 1.25E-10 | 9.69E-10 |
| 8446  | IFIT1    | 1143.999261 | 0.643848241 | 0.199375 | 3.229329 | 0.001241 | 0.00288  |
| 4599  | LMBR1    | 1127.597093 | 0.643745207 | 0.129048 | 4.988421 | 6.09E-07 | 2.59E-06 |



|       |           |             |             |          |          |          |          |
|-------|-----------|-------------|-------------|----------|----------|----------|----------|
| 9356  | SCAND3    | 107.5768137 | 0.643615798 | 0.223623 | 2.878129 | 0.004    | 0.008381 |
| 11219 | TLL7      | 94.84288638 | 0.643565674 | 0.290567 | 2.214863 | 0.026769 | 0.04677  |
| 16194 | CCDC60    | 0.3782414   | 0.643072038 | 0.981321 | 0.655312 | 0.512267 | 0.619964 |
| 8757  | CERKL     | 220.5295276 | 0.643050634 | 0.20724  | 3.102928 | 0.001916 | 0.004289 |
| 1975  | NBR1      | 4052.590121 | 0.64291177  | 0.091899 | 6.995888 | 2.64E-12 | 2.62E-11 |
| 4277  | PYROXD1   | 641.1500616 | 0.642855902 | 0.124391 | 5.168023 | 2.37E-07 | 1.08E-06 |
| 14856 | SLC39A2   | 2.2731819   | 0.642296469 | 0.611158 | 1.050951 | 0.293281 | 0.386955 |
| 2426  | ZNF14     | 195.7504802 | 0.642279042 | 0.098266 | 6.536135 | 6.31E-11 | 5.10E-10 |
| 5822  | NIPSNAP3I | 53.34773923 | 0.642173892 | 0.147231 | 4.361684 | 1.29E-05 | 4.35E-05 |
| 1654  | PEX19     | 1857.547055 | 0.641927989 | 0.087295 | 7.353578 | 1.93E-13 | 2.29E-12 |
| 15980 | OR2T11    | 0.232719112 | 0.641832376 | 0.894418 | 0.717598 | 0.473005 | 0.580186 |
| 16077 | ZFATAS    | 0.179060589 | 0.641832193 | 0.929713 | 0.690356 | 0.489971 | 0.59737  |
| 16941 | KRT40     | 0.200858619 | 0.641830221 | 1.418422 | 0.452496 | 0.650912 | 0.753115 |
| 17095 | TMEM8C    | 0.203193121 | 0.64182956  | 1.546569 | 0.415002 | 0.67814  | 0.777551 |
| 17103 | GRK1      | 0.162315241 | 0.641829358 | 1.558055 | 0.411943 | 0.680381 | 0.779755 |
| 17249 | C3orf77   | 0.158929427 | 0.641828519 | 1.701342 | 0.377248 | 0.705989 | 0.802208 |
| 17356 | PSG6      | 0.361361796 | 0.641828496 | 1.826373 | 0.351422 | 0.725271 | 0.819102 |
| 17305 | HIST1H2B4 | 0.097182847 | 0.641827918 | 1.755175 | 0.365677 | 0.714606 | 0.809445 |
| 17379 | PSG7      | 0.203492843 | 0.641827735 | 1.855023 | 0.345995 | 0.729347 | 0.822598 |
| 17383 | SELV      | 0.198320678 | 0.641827709 | 1.859105 | 0.345235 | 0.729918 | 0.823001 |
| 17823 | AMTN      | 0.170330454 | 0.641821032 | 2.65704  | 0.241555 | 0.809125 | 0.889842 |
| 17913 | ANTXRL    | 0.09833784  | 0.641818478 | 2.844527 | 0.225633 | 0.821487 | 0.898848 |
| 17939 | OR51T1    | 0.106656381 | 0.641817723 | 2.91407  | 0.220248 | 0.825678 | 0.902175 |
| 8361  | DHRS11    | 161.7897165 | 0.641242347 | 0.1963   | 3.266639 | 0.001088 | 0.002551 |
| 4949  | ZNF790    | 129.8033077 | 0.641104422 | 0.133579 | 4.799433 | 1.59E-06 | 6.30E-06 |
| 8402  | C9orf129  | 68.63623267 | 0.641052274 | 0.197382 | 3.24778  | 0.001163 | 0.002713 |
| 3491  | APPBP2    | 1134.368078 | 0.640895594 | 0.112796 | 5.681917 | 1.33E-08 | 7.48E-08 |
| 10518 | AKR7L     | 57.16922057 | 0.640890167 | 0.259983 | 2.465126 | 0.013696 | 0.025524 |
| 4035  | SPTY2D1   | 926.9448807 | 0.640858866 | 0.120593 | 5.314219 | 1.07E-07 | 5.20E-07 |
| 1910  | VEZF1     | 1550.634264 | 0.640772348 | 0.090554 | 7.076121 | 1.48E-12 | 1.52E-11 |
| 16368 | VGLL1     | 0.434268711 | 0.640689015 | 1.05243  | 0.608771 | 0.542676 | 0.649865 |
| 13334 | SLC9A10   | 1.360263298 | 0.640187264 | 0.417771 | 1.532389 | 0.125427 | 0.184377 |
| 5039  | MUTED     | 623.1237563 | 0.640139138 | 0.134651 | 4.754061 | 1.99E-06 | 7.76E-06 |
| 10415 | LRP5L     | 86.41278071 | 0.64010194  | 0.255513 | 2.505163 | 0.012239 | 0.023035 |
| 3655  | KDSR      | 2181.087102 | 0.640015458 | 0.11497  | 5.566795 | 2.59E-08 | 1.39E-07 |
| 6658  | C1orf58   | 319.5617136 | 0.639992894 | 0.161626 | 3.95972  | 7.50E-05 | 0.000221 |
| 8887  | TSPAN18   | 2028.548089 | 0.639926541 | 0.209341 | 3.056867 | 0.002237 | 0.004933 |
| 4984  | KIAA0317  | 808.6855791 | 0.639776768 | 0.133787 | 4.782048 | 1.74E-06 | 6.82E-06 |
| 14982 | CPNE4     | 1.031532266 | 0.639517161 | 0.632558 | 1.011002 | 0.312016 | 0.408211 |
| 2366  | MAPK1IP1I | 2321.580975 | 0.639461845 | 0.096997 | 6.592614 | 4.32E-11 | 3.58E-10 |
| 3503  | XPA       | 236.9561773 | 0.638867879 | 0.112643 | 5.671639 | 1.41E-08 | 7.91E-08 |
| 4567  | ZNF670    | 48.88680663 | 0.638826969 | 0.127745 | 5.000817 | 5.71E-07 | 2.45E-06 |
| 6751  | CHMP4C    | 270.7597664 | 0.638742003 | 0.163007 | 3.918484 | 8.91E-05 | 0.000259 |
| 4877  | SIPA1L1   | 1372.300365 | 0.638667079 | 0.131862 | 4.843459 | 1.28E-06 | 5.13E-06 |
| 3035  | ZNF566    | 188.6958054 | 0.638586703 | 0.106289 | 6.008015 | 1.88E-09 | 1.21E-08 |
| 9509  | RHOB      | 15223.32103 | 0.638538449 | 0.226703 | 2.816625 | 0.004853 | 0.010004 |
| 3005  | ZNF562    | 413.4809899 | 0.638225566 | 0.105831 | 6.030598 | 1.63E-09 | 1.07E-08 |

|       |           |             |             |          |          |          |          |
|-------|-----------|-------------|-------------|----------|----------|----------|----------|
| 4257  | LOC344595 | 120.7102666 | 0.637412202 | 0.12307  | 5.179272 | 2.23E-07 | 1.03E-06 |
| 12205 | DPYS      | 1155.297429 | 0.637145784 | 0.336223 | 1.895008 | 0.058091 | 0.093294 |
| 4736  | EXTL2     | 363.2203448 | 0.637120877 | 0.129599 | 4.916096 | 8.83E-07 | 3.65E-06 |
| 10079 | LOC285456 | 2.591168756 | 0.637120709 | 0.242673 | 2.625433 | 0.008654 | 0.01683  |
| 4547  | ZNF800    | 552.149522  | 0.636996464 | 0.127128 | 5.010687 | 5.42E-07 | 2.34E-06 |
| 4515  | KLHL8     | 469.1409197 | 0.636962113 | 0.12669  | 5.02771  | 4.96E-07 | 2.15E-06 |
| 3257  | ZNF559    | 285.1556384 | 0.636813058 | 0.108896 | 5.847876 | 4.98E-09 | 3.00E-08 |
| 4593  | TMEM66    | 10567.38856 | 0.636807589 | 0.127599 | 4.99069  | 6.02E-07 | 2.57E-06 |
| 2432  | SLAIN2    | 1297.087385 | 0.636772616 | 0.097524 | 6.529421 | 6.60E-11 | 5.32E-10 |
| 6928  | INSR      | 6468.173782 | 0.636729382 | 0.165295 | 3.852085 | 0.000117 | 0.000331 |
| 3698  | SPRYD4    | 423.8466172 | 0.636506004 | 0.114974 | 5.536075 | 3.09E-08 | 1.64E-07 |
| 14444 | DGKK      | 0.439405998 | 0.636292283 | 0.537444 | 1.183922 | 0.236444 | 0.320877 |
| 6436  | CAPN5     | 577.1108562 | 0.636075948 | 0.156869 | 4.05482  | 5.02E-05 | 0.000153 |
| 6328  | PANK3     | 445.4573488 | 0.636075406 | 0.154641 | 4.113246 | 3.90E-05 | 0.000121 |
| 1974  | TDRD7     | 501.1341004 | 0.635556877 | 0.090834 | 6.99694  | 2.62E-12 | 2.60E-11 |
| 2567  | COPS4     | 795.1256321 | 0.635511709 | 0.099115 | 6.411888 | 1.44E-10 | 1.10E-09 |
| 10686 | KIF26A    | 182.4478838 | 0.635177127 | 0.264534 | 2.401119 | 0.016345 | 0.029981 |
| 3451  | VPS54     | 837.9014636 | 0.634216587 | 0.111145 | 5.706233 | 1.16E-08 | 6.56E-08 |
| 6038  | APBB1     | 846.4893623 | 0.634189852 | 0.149226 | 4.249861 | 2.14E-05 | 6.94E-05 |
| 5239  | C20orf7   | 189.5379586 | 0.634124585 | 0.136176 | 4.656647 | 3.21E-06 | 1.20E-05 |
| 9198  | GATSL1    | 13.62055558 | 0.634111222 | 0.215599 | 2.941164 | 0.00327  | 0.006968 |
| 2027  | ZNF506    | 430.4796204 | 0.634046708 | 0.09147  | 6.931739 | 4.16E-12 | 4.02E-11 |
| 1721  | FAM175B   | 469.467254  | 0.633980864 | 0.087171 | 7.272871 | 3.52E-13 | 4.01E-12 |
| 8454  | KIAA1467  | 467.0904596 | 0.633905492 | 0.196432 | 3.227099 | 0.001251 | 0.002899 |
| 7369  | PLA2G4C   | 414.7632395 | 0.633740886 | 0.172659 | 3.67047  | 0.000242 | 0.000644 |
| 8099  | AKAP3     | 19.00339616 | 0.63352886  | 0.187918 | 3.371296 | 0.000748 | 0.001811 |
| 4268  | MDH1      | 3167.20227  | 0.633256471 | 0.122432 | 5.172307 | 2.31E-07 | 1.06E-06 |
| 5395  | FAR1      | 1265.22512  | 0.633242693 | 0.138627 | 4.567954 | 4.93E-06 | 1.79E-05 |
| 9116  | HOXB6     | 227.1301794 | 0.633092447 | 0.212992 | 2.972374 | 0.002955 | 0.006354 |
| 4996  | CHMP2B    | 983.1879848 | 0.632727747 | 0.13248  | 4.776021 | 1.79E-06 | 7.01E-06 |
| 2983  | SPG20     | 2189.764084 | 0.632608642 | 0.104605 | 6.047622 | 1.47E-09 | 9.66E-09 |
| 3575  | CDC42BPE  | 3357.323442 | 0.632067252 | 0.112452 | 5.620777 | 1.90E-08 | 1.04E-07 |
| 13726 | F5        | 601.4620727 | 0.632051057 | 0.449022 | 1.407618 | 0.159244 | 0.227404 |
| 5605  | C9orf130  | 171.4417258 | 0.631749756 | 0.141392 | 4.468064 | 7.89E-06 | 2.76E-05 |
| 6269  | TMEM133   | 394.9783418 | 0.631516646 | 0.152245 | 4.148015 | 3.35E-05 | 0.000105 |
| 7951  | NUDT4     | 1076.440626 | 0.631353074 | 0.184193 | 3.427663 | 0.000609 | 0.001501 |
| 9845  | NAALADL   | 81.92063718 | 0.631255417 | 0.233306 | 2.7057   | 0.006816 | 0.01357  |
| 1535  | GALK2     | 537.7220132 | 0.631039228 | 0.084015 | 7.511046 | 5.87E-14 | 7.49E-13 |
| 10306 | GAS6      | 2949.098177 | 0.630906274 | 0.248075 | 2.543205 | 0.010984 | 0.020891 |
| 7194  | ZNF460    | 57.39747832 | 0.630701381 | 0.168259 | 3.748401 | 0.000178 | 0.000485 |
| 3298  | MEF2A     | 2453.045292 | 0.63012851  | 0.108321 | 5.817251 | 5.98E-09 | 3.56E-08 |
| 4292  | DARS2     | 577.5822454 | 0.630100843 | 0.122117 | 5.159817 | 2.47E-07 | 1.13E-06 |
| 12001 | ZNF826    | 349.4244181 | 0.630039523 | 0.32141  | 1.960237 | 0.049968 | 0.081612 |
| 6237  | ARHGAP29  | 3056.849461 | 0.629825729 | 0.151419 | 4.159491 | 3.19E-05 | 0.0001   |
| 7175  | SOX13     | 768.9217875 | 0.629223038 | 0.167616 | 3.753964 | 0.000174 | 0.000476 |
| 4418  | C8orf42   | 565.9333778 | 0.629097515 | 0.123568 | 5.091123 | 3.56E-07 | 1.58E-06 |
| 12090 | ST14      | 1626.52246  | 0.628595586 | 0.325435 | 1.931557 | 0.053414 | 0.086598 |

|       |          |             |             |          |          |          |          |
|-------|----------|-------------|-------------|----------|----------|----------|----------|
| 2644  | C4orf41  | 856.2587797 | 0.6282708   | 0.099261 | 6.329455 | 2.46E-10 | 1.82E-09 |
| 2455  | FASTKD2  | 974.4104587 | 0.628249931 | 0.096515 | 6.509357 | 7.55E-11 | 6.03E-10 |
| 3635  | SLC25A12 | 562.9575891 | 0.628131788 | 0.112537 | 5.581541 | 2.38E-08 | 1.29E-07 |
| 7366  | LRP5     | 1684.404057 | 0.628104224 | 0.171031 | 3.672462 | 0.00024  | 0.000639 |
| 12209 | IGSF22   | 10.31764432 | 0.627980491 | 0.331555 | 1.894048 | 0.058219 | 0.093467 |
| 6119  | ZNF10    | 231.3809568 | 0.627954424 | 0.149104 | 4.211527 | 2.54E-05 | 8.12E-05 |
| 13184 | CNKSR1   | 31.79047471 | 0.627926862 | 0.396276 | 1.58457  | 0.113064 | 0.168095 |
| 7822  | LYSMD2   | 435.5661589 | 0.627770866 | 0.179719 | 3.493067 | 0.000478 | 0.001197 |
| 5469  | FAM91A1  | 1770.577501 | 0.627755985 | 0.138451 | 4.53415  | 5.78E-06 | 2.07E-05 |
| 14401 | CAPSL    | 0.884175537 | 0.627460557 | 0.523908 | 1.197655 | 0.231051 | 0.314481 |
| 2892  | BTBD9    | 450.8740485 | 0.627450634 | 0.102597 | 6.115707 | 9.61E-10 | 6.52E-09 |
| 1675  | TRMT5    | 371.8975114 | 0.627266895 | 0.085568 | 7.330617 | 2.29E-13 | 2.68E-12 |
| 9103  | HEY1     | 459.7495422 | 0.627242116 | 0.21079  | 2.975668 | 0.002924 | 0.006295 |
| 4945  | KLF12    | 720.2889318 | 0.627143644 | 0.130589 | 4.802418 | 1.57E-06 | 6.21E-06 |
| 1868  | REV1     | 652.6867134 | 0.627138794 | 0.088066 | 7.121214 | 1.07E-12 | 1.12E-11 |
| 8505  | FLJ37201 | 19.43825933 | 0.627112319 | 0.195813 | 3.202607 | 0.001362 | 0.003138 |
| 1828  | DNAJA2   | 2049.828972 | 0.627050451 | 0.08751  | 7.165455 | 7.75E-13 | 8.31E-12 |
| 5191  | SENP7    | 515.4064837 | 0.626792096 | 0.133936 | 4.679775 | 2.87E-06 | 1.08E-05 |
| 7116  | HSD17B11 | 1589.155693 | 0.626423868 | 0.165762 | 3.779052 | 0.000157 | 0.000434 |
| 4531  | ZFX      | 643.5726066 | 0.626299525 | 0.124799 | 5.018466 | 5.21E-07 | 2.25E-06 |
| 2055  | LARP7    | 846.1576105 | 0.626255196 | 0.090781 | 6.898551 | 5.25E-12 | 5.01E-11 |
| 3062  | CRBN     | 688.0451656 | 0.625956826 | 0.10448  | 5.99114  | 2.08E-09 | 1.33E-08 |
| 8320  | SEMA5A   | 1280.724931 | 0.625596012 | 0.190542 | 3.283247 | 0.001026 | 0.002417 |
| 8874  | SEPP1    | 12931.22675 | 0.625499271 | 0.204251 | 3.062409 | 0.002196 | 0.00485  |
| 3391  | RFXAP    | 99.71309619 | 0.625279024 | 0.108684 | 5.75317  | 8.76E-09 | 5.06E-08 |
| 5139  | PRKAB2   | 619.7563506 | 0.624837879 | 0.132695 | 4.708825 | 2.49E-06 | 9.50E-06 |
| 7258  | PTGR1    | 1497.873892 | 0.624551253 | 0.16778  | 3.722438 | 0.000197 | 0.000533 |
| 4594  | DICER1   | 1389.863928 | 0.624398792 | 0.125121 | 4.99035  | 6.03E-07 | 2.57E-06 |
| 12526 | PACSIN1  | 41.51241918 | 0.624333145 | 0.347478 | 1.796756 | 0.072374 | 0.113244 |
| 3679  | ARL1     | 3208.358754 | 0.624254302 | 0.112442 | 5.551792 | 2.83E-08 | 1.51E-07 |
| 1651  | PRPF4B   | 1462.69126  | 0.624034894 | 0.084821 | 7.357104 | 1.88E-13 | 2.23E-12 |
| 12388 | TPRG1    | 46.93645761 | 0.623966121 | 0.339179 | 1.839636 | 0.065822 | 0.104147 |
| 5151  | MLLT4    | 2274.784297 | 0.623902782 | 0.13269  | 4.701974 | 2.58E-06 | 9.80E-06 |
| 4181  | ITFG1    | 1467.258217 | 0.623788915 | 0.119373 | 5.225537 | 1.74E-07 | 8.14E-07 |
| 7358  | AKAP7    | 266.7665825 | 0.623744566 | 0.169746 | 3.674569 | 0.000238 | 0.000635 |
| 6952  | QDPR     | 1182.000088 | 0.623651724 | 0.162203 | 3.844873 | 0.000121 | 0.00034  |
| 13698 | KCNJ10   | 61.29161629 | 0.622772243 | 0.439137 | 1.418172 | 0.156141 | 0.223428 |
| 3138  | FAM76A   | 246.4241877 | 0.622742959 | 0.104932 | 5.934756 | 2.94E-09 | 1.84E-08 |
| 6802  | WRN      | 266.0696105 | 0.622741112 | 0.159685 | 3.899817 | 9.63E-05 | 0.000277 |
| 5684  | SLC17A5  | 1043.034265 | 0.622386922 | 0.140531 | 4.428821 | 9.47E-06 | 3.27E-05 |
| 4322  | ZNF148   | 1442.898523 | 0.622300073 | 0.120923 | 5.146262 | 2.66E-07 | 1.21E-06 |
| 6363  | CEP97    | 117.9587251 | 0.62223394  | 0.15192  | 4.095795 | 4.21E-05 | 0.00013  |
| 5757  | ZNF671   | 204.1974428 | 0.622159631 | 0.14163  | 4.392862 | 1.12E-05 | 3.81E-05 |
| 4424  | PSIP1    | 1460.335986 | 0.622121557 | 0.122275 | 5.087869 | 3.62E-07 | 1.60E-06 |
| 4246  | NPTN     | 3189.08234  | 0.62207507  | 0.120012 | 5.183462 | 2.18E-07 | 1.01E-06 |
| 12713 | SLC22A14 | 2.67883492  | 0.622058494 | 0.359936 | 1.728249 | 0.083944 | 0.129425 |
| 11384 | GCNT3    | 420.2029329 | 0.621967828 | 0.288214 | 2.15801  | 0.030927 | 0.05325  |

|       |          |             |             |          |          |          |          |
|-------|----------|-------------|-------------|----------|----------|----------|----------|
| 10668 | KBTBD10  | 13.02724488 | 0.621474983 | 0.258394 | 2.405144 | 0.016166 | 0.029703 |
| 5985  | JHRF1BP1 | 736.8843501 | 0.621461228 | 0.145346 | 4.275734 | 1.91E-05 | 6.24E-05 |
| 6835  | CHML     | 661.778359  | 0.621269551 | 0.159858 | 3.886374 | 0.000102 | 0.000292 |
| 6949  | ROCK2    | 1058.336904 | 0.621145023 | 0.161535 | 3.845255 | 0.00012  | 0.00034  |
| 14738 | KCNIP1   | 10.00836149 | 0.621075864 | 0.571204 | 1.087311 | 0.276899 | 0.368266 |
| 8308  | ITGAV    | 8629.883646 | 0.620996777 | 0.188784 | 3.289452 | 0.001004 | 0.002368 |
| 9928  | ZC3H12B  | 42.60402629 | 0.620653786 | 0.231777 | 2.677808 | 0.007411 | 0.014631 |
| 1399  | MTO1     | 426.3614212 | 0.62062717  | 0.080441 | 7.715271 | 1.21E-14 | 1.69E-13 |
| 12016 | ABCB1    | 803.1345487 | 0.620618195 | 0.317227 | 1.956384 | 0.05042  | 0.082239 |
| 3736  | PCBD2    | 462.1568043 | 0.620183482 | 0.112456 | 5.514901 | 3.49E-08 | 1.83E-07 |
| 10765 | CDKL5    | 86.49266351 | 0.620142716 | 0.26092  | 2.37675  | 0.017466 | 0.031802 |
| 12830 | AOX1     | 1421.745701 | 0.620052872 | 0.365722 | 1.69542  | 0.089996 | 0.137491 |
| 2092  | KIF1B    | 1667.620339 | 0.619589082 | 0.090406 | 6.85339  | 7.21E-12 | 6.76E-11 |
| 3440  | CAPN7    | 553.4939869 | 0.619474414 | 0.108366 | 5.716499 | 1.09E-08 | 6.20E-08 |
| 8103  | STON1    | 548.6904444 | 0.619356289 | 0.183764 | 3.370389 | 0.000751 | 0.001816 |
| 3517  | TGDS     | 266.5076098 | 0.619094427 | 0.10934  | 5.662129 | 1.50E-08 | 8.33E-08 |
| 4636  | BCOR     | 838.9357363 | 0.618962357 | 0.124518 | 4.97085  | 6.67E-07 | 2.82E-06 |
| 1401  | HELQ     | 268.1531729 | 0.618846386 | 0.08023  | 7.713373 | 1.23E-14 | 1.71E-13 |
| 6058  | POLI     | 581.5338719 | 0.618835819 | 0.145927 | 4.240731 | 2.23E-05 | 7.21E-05 |
| 9450  | CCNT1    | 184.9068791 | 0.618527545 | 0.217956 | 2.837855 | 0.004542 | 0.00942  |
| 6593  | PPIP5K1  | 507.8960479 | 0.618294271 | 0.155138 | 3.985441 | 6.74E-05 | 0.0002   |
| 10060 | ZNF880   | 128.1190358 | 0.617778285 | 0.234642 | 2.63285  | 0.008467 | 0.016498 |
| 5563  | MCCC2    | 2169.022326 | 0.617732192 | 0.137538 | 4.491369 | 7.08E-06 | 2.49E-05 |
| 3452  | FAM200B  | 442.9049532 | 0.617342119 | 0.108192 | 5.705995 | 1.16E-08 | 6.57E-08 |
| 1924  | RABGAP1  | 1187.234546 | 0.617154631 | 0.087408 | 7.060637 | 1.66E-12 | 1.69E-11 |
| 10660 | AMPD3    | 738.7620929 | 0.617150851 | 0.256274 | 2.408173 | 0.016033 | 0.02948  |
| 5169  | KDM6A    | 579.8713871 | 0.616468703 | 0.131433 | 4.690378 | 2.73E-06 | 1.03E-05 |
| 7069  | TWF1     | 2607.946475 | 0.616385052 | 0.162406 | 3.795335 | 0.000147 | 0.000409 |
| 4813  | CDC73    | 1210.80436  | 0.616380491 | 0.126246 | 4.882358 | 1.05E-06 | 4.27E-06 |
| 8813  | OPLAH    | 466.2408569 | 0.616367656 | 0.199921 | 3.083055 | 0.002049 | 0.004557 |
| 5152  | CISD2    | 1150.188652 | 0.616203727 | 0.131057 | 4.701785 | 2.58E-06 | 9.81E-06 |
| 9361  | NAALAD2  | 16.13217432 | 0.616104266 | 0.21421  | 2.876163 | 0.004025 | 0.008429 |
| 13712 | GRIA3    | 40.81870605 | 0.616087053 | 0.435487 | 1.414708 | 0.157154 | 0.224648 |
| 8347  | LRIG3    | 631.33828   | 0.616079242 | 0.188116 | 3.274997 | 0.001057 | 0.002481 |
| 4343  | RABL3    | 691.6942675 | 0.616078596 | 0.119952 | 5.136041 | 2.81E-07 | 1.27E-06 |
| 3473  | UBQLN1   | 2897.52525  | 0.615956771 | 0.108169 | 5.694393 | 1.24E-08 | 6.99E-08 |
| 7341  | HNMT     | 1908.399215 | 0.615927966 | 0.167186 | 3.684084 | 0.00023  | 0.000613 |
| 2781  | MPPE1    | 895.7706783 | 0.61540412  | 0.099063 | 6.212224 | 5.22E-10 | 3.68E-09 |
| 11502 | GPR126   | 1373.199922 | 0.615244947 | 0.290618 | 2.117026 | 0.034258 | 0.05838  |
| 12871 | FMO2     | 884.4932255 | 0.614865982 | 0.364871 | 1.685161 | 0.091957 | 0.140029 |
| 11274 | PRSS8    | 933.3600522 | 0.614788451 | 0.280818 | 2.189281 | 0.028576 | 0.049683 |
| 9783  | SCML2    | 23.77165706 | 0.614423563 | 0.225757 | 2.721615 | 0.006496 | 0.013016 |
| 1944  | ZRANB1   | 813.4462804 | 0.614409247 | 0.087277 | 7.039784 | 1.93E-12 | 1.94E-11 |
| 4142  | SLC35A5  | 953.8456393 | 0.614404074 | 0.116856 | 5.257804 | 1.46E-07 | 6.90E-07 |
| 3610  | UFSP2    | 840.1991171 | 0.614371198 | 0.109678 | 5.601583 | 2.12E-08 | 1.15E-07 |
| 2645  | ABARAP1  | 1995.318491 | 0.614199754 | 0.097061 | 6.327988 | 2.48E-10 | 1.84E-09 |
| 8561  | GPR137B  | 1208.12498  | 0.61412787  | 0.192738 | 3.186342 | 0.001441 | 0.003299 |

|       |           |             |             |          |          |          |          |
|-------|-----------|-------------|-------------|----------|----------|----------|----------|
| 3834  | EAPP      | 764.3596029 | 0.613949503 | 0.112787 | 5.443421 | 5.23E-08 | 2.67E-07 |
| 5187  | CCNYL1    | 646.2133595 | 0.613803191 | 0.131112 | 4.6815   | 2.85E-06 | 1.08E-05 |
| 2862  | ANKRD17   | 2209.651346 | 0.613742808 | 0.100061 | 6.133696 | 8.59E-10 | 5.88E-09 |
| 4269  | RUFY2     | 360.3419682 | 0.613631083 | 0.118647 | 5.171901 | 2.32E-07 | 1.06E-06 |
| 7119  | EHBP1     | 1412.303652 | 0.613587293 | 0.162416 | 3.777882 | 0.000158 | 0.000435 |
| 9934  | BAIAP3    | 140.7678699 | 0.613453425 | 0.229186 | 2.676663 | 0.007436 | 0.014672 |
| 5907  | ZFAND5    | 5462.213625 | 0.613374633 | 0.142021 | 4.31889  | 1.57E-05 | 5.20E-05 |
| 4456  | BOD1L     | 1244.50786  | 0.613172286 | 0.12108  | 5.064171 | 4.10E-07 | 1.80E-06 |
| 4746  | ZNF618    | 829.0945689 | 0.613152198 | 0.124869 | 4.910361 | 9.09E-07 | 3.75E-06 |
| 4981  | THAP10    | 74.09710116 | 0.612887928 | 0.128141 | 4.7829   | 1.73E-06 | 6.80E-06 |
| 5223  | DECR1     | 1902.834926 | 0.612701253 | 0.131282 | 4.667067 | 3.06E-06 | 1.15E-05 |
| 7466  | ZNF614    | 315.9496399 | 0.61247682  | 0.168759 | 3.6293   | 0.000284 | 0.000746 |
| 8314  | LEPROT    | 1069.859248 | 0.612359286 | 0.186353 | 3.286016 | 0.001016 | 0.002396 |
| 4170  | DDX3X     | 7309.245723 | 0.612301162 | 0.116934 | 5.236297 | 1.64E-07 | 7.70E-07 |
| 9824  | C20orf152 | 3.980510105 | 0.612298008 | 0.225933 | 2.71009  | 0.006726 | 0.013419 |
| 3133  | DDX52     | 522.3317088 | 0.612129951 | 0.1031   | 5.937242 | 2.90E-09 | 1.81E-08 |
| 5662  | CRAT      | 1522.167837 | 0.612122202 | 0.13781  | 4.441768 | 8.92E-06 | 3.09E-05 |
| 17684 | RGPD8     | 0.411131399 | 0.611983757 | 2.251069 | 0.271864 | 0.785727 | 0.87091  |
| 3945  | TLK1      | 1323.661013 | 0.611806149 | 0.113773 | 5.377421 | 7.56E-08 | 3.75E-07 |
| 4474  | CCDC132   | 509.4003323 | 0.61165996  | 0.120985 | 5.055657 | 4.29E-07 | 1.88E-06 |
| 3188  | CCNDBP1   | 1140.587011 | 0.611059131 | 0.103756 | 5.889409 | 3.88E-09 | 2.38E-08 |
| 5601  | TET2      | 655.2133187 | 0.611041829 | 0.136658 | 4.471319 | 7.77E-06 | 2.72E-05 |
| 5085  | RAB33B    | 393.2514196 | 0.610897238 | 0.129136 | 4.730668 | 2.24E-06 | 8.63E-06 |
| 3074  | DDX24     | 2816.435598 | 0.610697582 | 0.10212  | 5.980208 | 2.23E-09 | 1.42E-08 |
| 5477  | RCN2      | 992.8604449 | 0.610616443 | 0.134733 | 4.532033 | 5.84E-06 | 2.09E-05 |
| 4666  | LRRC49    | 154.205989  | 0.610498262 | 0.123241 | 4.953714 | 7.28E-07 | 3.06E-06 |
| 5524  | JMJD1C    | 1673.177384 | 0.60991363  | 0.135306 | 4.50767  | 6.55E-06 | 2.33E-05 |
| 1610  | KIAA0391  | 655.0870033 | 0.609839916 | 0.082291 | 7.41081  | 1.26E-13 | 1.53E-12 |
| 3708  | PPP2CB    | 2430.638082 | 0.609586172 | 0.110189 | 5.532163 | 3.16E-08 | 1.67E-07 |
| 4783  | ERI2      | 325.0017232 | 0.609376932 | 0.12454  | 4.89302  | 9.93E-07 | 4.07E-06 |
| 7739  | C17orf97  | 184.3597496 | 0.609340867 | 0.172947 | 3.523291 | 0.000426 | 0.001079 |
| 4543  | C12orf26  | 102.3856432 | 0.609270561 | 0.121559 | 5.012136 | 5.38E-07 | 2.32E-06 |
| 4968  | PHF6      | 609.3051972 | 0.609232138 | 0.127213 | 4.789075 | 1.68E-06 | 6.61E-06 |
| 2702  | FAM168B   | 2758.168639 | 0.609172075 | 0.097022 | 6.278708 | 3.41E-10 | 2.48E-09 |
| 7679  | NHAMML    | 70.7981786  | 0.60903774  | 0.171679 | 3.547548 | 0.000389 | 0.000993 |
| 5688  | C9orf3    | 517.5031869 | 0.609002866 | 0.137576 | 4.426652 | 9.57E-06 | 3.30E-05 |
| 4120  | EARS2     | 742.1500268 | 0.609002744 | 0.115565 | 5.269795 | 1.37E-07 | 6.50E-07 |
| 7910  | PHLPP1    | 303.6025597 | 0.608976169 | 0.176795 | 3.444542 | 0.000572 | 0.001417 |
| 2099  | UBE2D3    | 6210.976039 | 0.608750062 | 0.088861 | 6.85061  | 7.35E-12 | 6.87E-11 |
| 13048 | CKB       | 4298.476591 | 0.608684433 | 0.373223 | 1.630887 | 0.102914 | 0.1546   |
| 9733  | EIF3C     | 288.9837375 | 0.608559508 | 0.222284 | 2.73776  | 0.006186 | 0.012458 |
| 2449  | TRMT61B   | 282.7254116 | 0.608490183 | 0.093426 | 6.513047 | 7.36E-11 | 5.89E-10 |
| 13585 | RAMP1     | 95.50970522 | 0.60820405  | 0.416824 | 1.459139 | 0.144527 | 0.208527 |
| 6157  | ZNF43     | 408.2983311 | 0.608008147 | 0.144789 | 4.199273 | 2.68E-05 | 8.52E-05 |
| 5691  | CNTLN     | 316.2806493 | 0.607408519 | 0.13724  | 4.425901 | 9.60E-06 | 3.31E-05 |
| 14711 | LOC339240 | 0.561418247 | 0.607241659 | 0.554813 | 1.094497 | 0.273737 | 0.364728 |
| 4334  | TMEM80    | 244.7434586 | 0.607146005 | 0.118114 | 5.140337 | 2.74E-07 | 1.24E-06 |

|       |           |             |             |          |          |          |          |
|-------|-----------|-------------|-------------|----------|----------|----------|----------|
| 4298  | METT5D1   | 448.636301  | 0.607076443 | 0.117697 | 5.157982 | 2.50E-07 | 1.14E-06 |
| 14608 | PRSS55    | 0.682151343 | 0.606952631 | 0.536767 | 1.130756 | 0.258158 | 0.346396 |
| 6649  | ATP11C    | 881.9602006 | 0.606647476 | 0.153116 | 3.962002 | 7.43E-05 | 0.000219 |
| 10883 | FGFBP2    | 37.55148665 | 0.606419944 | 0.260509 | 2.327823 | 0.019921 | 0.03588  |
| 3024  | SNX19     | 1759.936766 | 0.606416269 | 0.100779 | 6.017276 | 1.77E-09 | 1.15E-08 |
| 5377  | SNX24     | 375.7774991 | 0.606182823 | 0.132413 | 4.577985 | 4.69E-06 | 1.71E-05 |
| 11444 | MYO7A     | 569.9963078 | 0.60539308  | 0.283425 | 2.135994 | 0.03268  | 0.055973 |
| 1922  | SUV420H1  | 940.2686622 | 0.604997804 | 0.085661 | 7.062736 | 1.63E-12 | 1.66E-11 |
| 3709  | ZNF280D   | 720.2967133 | 0.604867468 | 0.109339 | 5.532029 | 3.17E-08 | 1.67E-07 |
| 11227 | FCN3      | 376.5655931 | 0.604627771 | 0.273493 | 2.210765 | 0.027052 | 0.04723  |
| 11938 | SLC16A10  | 116.1610934 | 0.604444056 | 0.30548  | 1.978672 | 0.047853 | 0.07857  |
| 7440  | MYSM1     | 130.1861453 | 0.604428751 | 0.166049 | 3.640067 | 0.000273 | 0.000718 |
| 6524  | SCYL2     | 911.0647634 | 0.604412527 | 0.150512 | 4.015723 | 5.93E-05 | 0.000178 |
| 3457  | C6orf162  | 110.4526691 | 0.604340653 | 0.105986 | 5.702091 | 1.18E-08 | 6.71E-08 |
| 7030  | SPIN4     | 136.7391033 | 0.603752637 | 0.158518 | 3.80873  | 0.00014  | 0.000389 |
| 5314  | ZNF345    | 86.27214868 | 0.603627924 | 0.130827 | 4.613944 | 3.95E-06 | 1.46E-05 |
| 10193 | C6orf164  | 11.4126555  | 0.603485381 | 0.233439 | 2.5852   | 0.009732 | 0.018715 |
| 7064  | TTC30A    | 442.1677497 | 0.603125153 | 0.158863 | 3.796518 | 0.000147 | 0.000407 |
| 4428  | ECHDC1    | 1095.572516 | 0.602930493 | 0.118554 | 5.085694 | 3.66E-07 | 1.62E-06 |
| 1500  | ALKBH1    | 241.3607178 | 0.602523998 | 0.079629 | 7.566672 | 3.83E-14 | 5.00E-13 |
| 4358  | ACTR6     | 491.71699   | 0.602237787 | 0.117469 | 5.126777 | 2.95E-07 | 1.33E-06 |
| 10745 | INPP4B    | 321.3982024 | 0.602105097 | 0.252684 | 2.382837 | 0.01718  | 0.031339 |
| 9036  | C20orf132 | 31.37035894 | 0.601883058 | 0.200641 | 2.999805 | 0.002702 | 0.00586  |
| 13323 | GPC3      | 269.149781  | 0.601641782 | 0.391849 | 1.53539  | 0.124688 | 0.183443 |
| 8201  | KREMEN1   | 754.6631862 | 0.601559316 | 0.180537 | 3.332055 | 0.000862 | 0.00206  |
| 6618  | EFCAB6    | 58.23166016 | 0.601541688 | 0.151249 | 3.977174 | 6.97E-05 | 0.000207 |
| 8408  | MRPS25    | 804.5351095 | 0.601510681 | 0.185284 | 3.246421 | 0.001169 | 0.002724 |
| 12921 | CACNA1E   | 85.32511383 | 0.601427175 | 0.36077  | 1.667064 | 0.095502 | 0.144875 |
| 9520  | TMOD1     | 252.9144522 | 0.601346336 | 0.213793 | 2.812752 | 0.004912 | 0.010113 |
| 3796  | ZNF180    | 152.3187095 | 0.601151672 | 0.109789 | 5.475507 | 4.36E-08 | 2.25E-07 |
| 6479  | SPAG1     | 237.5786254 | 0.601126043 | 0.148913 | 4.036756 | 5.42E-05 | 0.000164 |
| 4314  | MNAT1     | 193.4393355 | 0.600938494 | 0.116721 | 5.14851  | 2.63E-07 | 1.19E-06 |
| 3797  | COQ10B    | 847.1890087 | 0.600881016 | 0.109745 | 5.475244 | 4.37E-08 | 2.26E-07 |
| 6552  | LOC646214 | 135.2605689 | 0.600727966 | 0.149982 | 4.005341 | 6.19E-05 | 0.000185 |
| 6347  | SPATA6    | 109.3411277 | 0.600714523 | 0.146335 | 4.105071 | 4.04E-05 | 0.000125 |
| 5863  | LEPROTL1  | 2128.059766 | 0.600426645 | 0.138367 | 4.339364 | 1.43E-05 | 4.78E-05 |
| 2648  | INTS6     | 732.0737176 | 0.600333792 | 0.0949   | 6.32596  | 2.52E-10 | 1.86E-09 |
| 9207  | VLDLR     | 1683.49463  | 0.60025199  | 0.20446  | 2.935789 | 0.003327 | 0.007083 |
| 13706 | RNF186    | 421.4461051 | 0.59924726  | 0.42316  | 1.416124 | 0.156739 | 0.224153 |
| 2890  | MPHOSPH8  | 796.299772  | 0.599192932 | 0.097944 | 6.117706 | 9.49E-10 | 6.44E-09 |
| 4888  | NUPL1     | 1374.105233 | 0.599190305 | 0.123958 | 4.83383  | 1.34E-06 | 5.37E-06 |
| 5104  | PDHB      | 1111.839195 | 0.599087537 | 0.126749 | 4.726571 | 2.28E-06 | 8.77E-06 |
| 6925  | KCNRG     | 7.720505881 | 0.599068998 | 0.155414 | 3.854655 | 0.000116 | 0.000328 |
| 3835  | COQ6      | 367.0366884 | 0.598833886 | 0.110036 | 5.442159 | 5.26E-08 | 2.69E-07 |
| 4967  | TANC1     | 966.3835945 | 0.598690655 | 0.125009 | 4.789172 | 1.67E-06 | 6.61E-06 |
| 5884  | XPR1      | 1701.226354 | 0.598508592 | 0.138199 | 4.330782 | 1.49E-05 | 4.95E-05 |
| 11958 | C1orf190  | 57.98037407 | 0.598297887 | 0.303403 | 1.971957 | 0.048615 | 0.079687 |

|       |           |             |             |          |          |          |          |
|-------|-----------|-------------|-------------|----------|----------|----------|----------|
| 10469 | RAPGEF3   | 543.7949899 | 0.59817697  | 0.240643 | 2.485748 | 0.012928 | 0.024205 |
| 12604 | FXDYD2    | 12894.53999 | 0.598062736 | 0.337701 | 1.770981 | 0.076564 | 0.119068 |
| 12940 | PRODH     | 1438.470268 | 0.598018271 | 0.359777 | 1.662193 | 0.096474 | 0.146135 |
| 4193  | 43897     | 1628.939633 | 0.597379589 | 0.114587 | 5.213317 | 1.85E-07 | 8.67E-07 |
| 8065  | FMO4      | 277.6924823 | 0.597364004 | 0.176407 | 3.386288 | 0.000708 | 0.001722 |
| 3315  | NAF1      | 160.1663788 | 0.597336472 | 0.102876 | 5.806399 | 6.38E-09 | 3.77E-08 |
| 5829  | KIAA0240  | 629.7411146 | 0.597284264 | 0.137112 | 4.356166 | 1.32E-05 | 4.45E-05 |
| 8774  | LEPR      | 537.3961231 | 0.597202466 | 0.192965 | 3.094868 | 0.001969 | 0.004399 |
| 8809  | ATP1A1    | 19498.77114 | 0.59691906  | 0.193559 | 3.083912 | 0.002043 | 0.004546 |
| 9175  | GNG7      | 245.6707289 | 0.59691473  | 0.202526 | 2.947354 | 0.003205 | 0.006847 |
| 9466  | FLJ13197  | 39.20690441 | 0.59636695  | 0.210618 | 2.831509 | 0.004633 | 0.009592 |
| 9428  | IL6R      | 601.7149868 | 0.596180252 | 0.209366 | 2.847557 | 0.004406 | 0.009159 |
| 3538  | ESCO1     | 418.7818298 | 0.596068625 | 0.105635 | 5.64274  | 1.67E-08 | 9.27E-08 |
| 8254  | SCAI      | 259.6552171 | 0.596019917 | 0.179995 | 3.311318 | 0.000929 | 0.002205 |
| 2774  | ZXDB      | 398.2640767 | 0.59589395  | 0.095862 | 6.216143 | 5.10E-10 | 3.60E-09 |
| 6950  | LOC645676 | 33.62940794 | 0.595328688 | 0.15483  | 3.845056 | 0.000121 | 0.00034  |
| 7378  | TTC30B    | 210.3208329 | 0.595164583 | 0.162312 | 3.666804 | 0.000246 | 0.000653 |
| 4706  | USP28     | 478.1440336 | 0.59514667  | 0.120755 | 4.92853  | 8.29E-07 | 3.45E-06 |
| 5100  | KAT2B     | 819.2401686 | 0.595066707 | 0.125884 | 4.7271   | 2.28E-06 | 8.75E-06 |
| 7926  | NMNAT3    | 173.690904  | 0.59505125  | 0.173077 | 3.438079 | 0.000586 | 0.001449 |
| 5456  | MRPS36    | 609.4931713 | 0.594411325 | 0.13092  | 4.540246 | 5.62E-06 | 2.02E-05 |
| 7213  | KIAA0664  | 2274.569613 | 0.594390133 | 0.158972 | 3.738969 | 0.000185 | 0.000502 |
| 5055  | HSPA9     | 8973.88307  | 0.594371077 | 0.125287 | 4.744072 | 2.09E-06 | 8.12E-06 |
| 10001 | HCG2P7    | 8.508303114 | 0.59412093  | 0.22402  | 2.652094 | 0.007999 | 0.015677 |
| 4020  | ATG2B     | 961.6878181 | 0.594099311 | 0.111496 | 5.328418 | 9.91E-08 | 4.83E-07 |
| 12932 | ENDOU     | 2.429490322 | 0.59366487  | 0.356724 | 1.664212 | 0.09607  | 0.145613 |
| 10949 | C9orf153  | 3.543549592 | 0.593573906 | 0.257627 | 2.304007 | 0.021222 | 0.037992 |
| 5219  | SMCR8     | 948.6849932 | 0.593339729 | 0.127021 | 4.67119  | 2.99E-06 | 1.12E-05 |
| 3693  | ZNF33A    | 1080.868028 | 0.593313139 | 0.10713  | 5.538234 | 3.06E-08 | 1.62E-07 |
| 11737 | NEURL3    | 74.96100324 | 0.593038395 | 0.290498 | 2.041454 | 0.041206 | 0.068814 |
| 5704  | RAB11FIP5 | 2269.865508 | 0.592994426 | 0.134191 | 4.419039 | 9.91E-06 | 3.41E-05 |
| 10302 | C1orf126  | 181.5931927 | 0.592896085 | 0.233019 | 2.544407 | 0.010946 | 0.020825 |
| 16502 | ITLN2     | 0.389180455 | 0.592844824 | 1.036077 | 0.572201 | 0.567186 | 0.6737   |
| 5420  | NBPF1     | 429.9374484 | 0.59251344  | 0.130055 | 4.555858 | 5.22E-06 | 1.89E-05 |
| 2277  | NCOA1     | 1503.267027 | 0.592503874 | 0.088789 | 6.673139 | 2.50E-11 | 2.16E-10 |
| 8903  | COX5A     | 2010.687148 | 0.592435052 | 0.194189 | 3.050822 | 0.002282 | 0.005024 |
| 2154  | RAD17     | 701.3776174 | 0.59235526  | 0.087029 | 6.806447 | 1.00E-11 | 9.10E-11 |
| 13989 | FAM81B    | 37.55253952 | 0.59231894  | 0.448184 | 1.321597 | 0.186302 | 0.261042 |
| 8092  | KLF8      | 395.9180737 | 0.592311198 | 0.175579 | 3.373479 | 0.000742 | 0.001798 |
| 7242  | PAFAH1B2  | 516.5666451 | 0.59228937  | 0.158852 | 3.728557 | 0.000193 | 0.000521 |
| 7622  | BCR       | 1382.709936 | 0.591708967 | 0.165743 | 3.570032 | 0.000357 | 0.000918 |
| 4015  | DHX29     | 899.9845912 | 0.591702348 | 0.111019 | 5.329747 | 9.83E-08 | 4.80E-07 |
| 4067  | ZFP91     | 2159.38114  | 0.591511287 | 0.111662 | 5.297316 | 1.18E-07 | 5.66E-07 |
| 6730  | ANKAR     | 50.14271872 | 0.591148061 | 0.150411 | 3.930221 | 8.49E-05 | 0.000247 |
| 8567  | TBC1D8B   | 546.3556796 | 0.59065368  | 0.185466 | 3.184708 | 0.001449 | 0.003315 |
| 11171 | AGBL4     | 5.745276696 | 0.590597779 | 0.264731 | 2.230938 | 0.025685 | 0.045064 |
| 3793  | ZCCHC11   | 670.2148651 | 0.590212933 | 0.107765 | 5.476873 | 4.33E-08 | 2.24E-07 |

|       |           |             |             |          |          |          |          |
|-------|-----------|-------------|-------------|----------|----------|----------|----------|
| 13305 | LRRC3B    | 2.72497933  | 0.589905228 | 0.38273  | 1.541308 | 0.123242 | 0.181561 |
| 7042  | PDE4D     | 1144.446489 | 0.589632999 | 0.155035 | 3.803233 | 0.000143 | 0.000398 |
| 5974  | EFCAB7    | 139.1755616 | 0.589617139 | 0.137739 | 4.280671 | 1.86E-05 | 6.11E-05 |
| 4853  | RANBP2    | 2481.883967 | 0.589580965 | 0.121244 | 4.862762 | 1.16E-06 | 4.68E-06 |
| 10154 | TAL1      | 162.2537174 | 0.589513909 | 0.226933 | 2.597746 | 0.009384 | 0.018114 |
| 13414 | STXBP6    | 115.9724442 | 0.589419333 | 0.39046  | 1.509552 | 0.131158 | 0.191652 |
| 10359 | ALDH1A1   | 9752.854461 | 0.589392772 | 0.23363  | 2.522765 | 0.011644 | 0.022032 |
| 5061  | THRA      | 949.6832005 | 0.589238764 | 0.124283 | 4.741086 | 2.13E-06 | 8.23E-06 |
| 5619  | POC1B     | 504.0047168 | 0.589135067 | 0.132014 | 4.462676 | 8.09E-06 | 2.82E-05 |
| 3508  | GSK3B     | 1253.818846 | 0.589039939 | 0.103939 | 5.66715  | 1.45E-08 | 8.12E-08 |
| 11761 | TPD52L1   | 432.829581  | 0.588964843 | 0.289633 | 2.033483 | 0.042004 | 0.070004 |
| 4937  | ISCA1P1   | 94.72584186 | 0.588952637 | 0.122558 | 4.8055   | 1.54E-06 | 6.13E-06 |
| 11324 | SLC22A15  | 144.5962059 | 0.588634149 | 0.270984 | 2.172207 | 0.02984  | 0.051651 |
| 4001  | DNAJC1    | 965.2232506 | 0.588354688 | 0.110186 | 5.339666 | 9.31E-08 | 4.56E-07 |
| 6010  | PHF16     | 330.7542217 | 0.588259081 | 0.138059 | 4.260935 | 2.04E-05 | 6.64E-05 |
| 6501  | FOXN3     | 2084.353934 | 0.587758976 | 0.145917 | 4.028048 | 5.62E-05 | 0.00017  |
| 3643  | ABHD5     | 409.7686109 | 0.587747459 | 0.1054   | 5.576337 | 2.46E-08 | 1.32E-07 |
| 4993  | GTPBP8    | 147.1578557 | 0.587669594 | 0.123006 | 4.777563 | 1.77E-06 | 6.97E-06 |
| 7201  | PPP4R2    | 352.1048762 | 0.587598298 | 0.156873 | 3.745696 | 0.00018  | 0.00049  |
| 7638  | C5orf55   | 113.427743  | 0.58734358  | 0.164744 | 3.565195 | 0.000364 | 0.000933 |
| 4789  | CAB39     | 2248.459399 | 0.58730471  | 0.120073 | 4.891232 | 1.00E-06 | 4.10E-06 |
| 3513  | PLEKHA3   | 427.0827667 | 0.587293841 | 0.103693 | 5.663793 | 1.48E-08 | 8.26E-08 |
| 4425  | CPPED1    | 1373.920679 | 0.587139206 | 0.115418 | 5.087047 | 3.64E-07 | 1.61E-06 |
| 4926  | CTDSPL2   | 685.7661135 | 0.586947397 | 0.121898 | 4.815051 | 1.47E-06 | 5.86E-06 |
| 7134  | LDHB      | 11565.31294 | 0.586889139 | 0.155596 | 3.771881 | 0.000162 | 0.000445 |
| 1441  | DHX15     | 2165.520342 | 0.586838829 | 0.076782 | 7.642924 | 2.12E-14 | 2.89E-13 |
| 4628  | FNIP1     | 982.4457297 | 0.586826932 | 0.117949 | 4.975268 | 6.52E-07 | 2.76E-06 |
| 4870  | SNRNP48   | 349.1046489 | 0.586766501 | 0.120967 | 4.850633 | 1.23E-06 | 4.95E-06 |
| 9080  | LOC647288 | 14.00017332 | 0.58667112  | 0.196413 | 2.986927 | 0.002818 | 0.006083 |
| 6189  | TBL1X     | 1755.585401 | 0.586576606 | 0.140298 | 4.180939 | 2.90E-05 | 9.19E-05 |
| 3791  | CGGBP1    | 2200.498809 | 0.586385236 | 0.107022 | 5.479117 | 4.27E-08 | 2.21E-07 |
| 9514  | SLAIN1    | 150.19767   | 0.586353172 | 0.208341 | 2.814394 | 0.004887 | 0.010068 |
| 9951  | MAP9      | 387.6084915 | 0.586228329 | 0.219475 | 2.671053 | 0.007561 | 0.014895 |
| 4415  | RTN4      | 9375.721953 | 0.586171566 | 0.115103 | 5.092567 | 3.53E-07 | 1.57E-06 |
| 6456  | CCDC122   | 59.76062637 | 0.58610978  | 0.144847 | 4.046392 | 5.20E-05 | 0.000158 |
| 10179 | C12orf75  | 1704.050357 | 0.585840031 | 0.226219 | 2.589704 | 0.009606 | 0.018497 |
| 4905  | RSBN1     | 686.2206232 | 0.585808743 | 0.121427 | 4.824358 | 1.40E-06 | 5.61E-06 |
| 3794  | N4BP2L2   | 1297.378185 | 0.585671558 | 0.106941 | 5.476583 | 4.34E-08 | 2.24E-07 |
| 8868  | LOC653653 | 127.7148005 | 0.585601049 | 0.191124 | 3.063981 | 0.002184 | 0.004828 |
| 8210  | UAP1      | 1234.899033 | 0.585416442 | 0.175935 | 3.327454 | 0.000876 | 0.002092 |
| 2881  | DSTYK     | 697.5117564 | 0.585231499 | 0.095573 | 6.123374 | 9.16E-10 | 6.23E-09 |
| 3149  | ADNP2     | 611.1803059 | 0.585117371 | 0.098801 | 5.922158 | 3.18E-09 | 1.98E-08 |
| 5035  | PMPCB     | 1915.789154 | 0.585002845 | 0.123014 | 4.755578 | 1.98E-06 | 7.70E-06 |
| 8417  | TECTA     | 15.71979081 | 0.584915514 | 0.180335 | 3.243494 | 0.001181 | 0.00275  |
| 6100  | DNAJC13   | 1761.13824  | 0.584905378 | 0.138554 | 4.221498 | 2.43E-05 | 7.80E-05 |
| 4694  | SMAD5     | 1716.692296 | 0.584823399 | 0.118581 | 4.931835 | 8.15E-07 | 3.40E-06 |
| 5695  | PJA2      | 4795.802958 | 0.584378993 | 0.132131 | 4.422721 | 9.75E-06 | 3.35E-05 |



|       |           |             |             |          |          |          |          |
|-------|-----------|-------------|-------------|----------|----------|----------|----------|
| 3881  | BAG5      | 1296.079051 | 0.584128129 | 0.107887 | 5.414239 | 6.15E-08 | 3.11E-07 |
| 16446 | STH       | 0.182741926 | 0.58412426  | 0.99325  | 0.588094 | 0.556469 | 0.663222 |
| 16984 | TCEB3C    | 0.252472029 | 0.584123146 | 1.318646 | 0.442972 | 0.657786 | 0.759142 |
| 17015 | IL1F7     | 0.256609357 | 0.584123065 | 1.337625 | 0.436687 | 0.662339 | 0.762967 |
| 16979 | NT5C1A    | 0.189975315 | 0.584123012 | 1.31491  | 0.44423  | 0.656876 | 0.758271 |
| 17108 | RBP2      | 0.216649431 | 0.584122558 | 1.425988 | 0.409627 | 0.68208  | 0.781473 |
| 17263 | C9orf4    | 0.135060293 | 0.584121611 | 1.56092  | 0.374216 | 0.708243 | 0.803799 |
| 17375 | DAZ2      | 0.292840862 | 0.584121567 | 1.682378 | 0.3472   | 0.728441 | 0.821765 |
| 17534 | C11orf36  | 0.130112399 | 0.584119526 | 1.901413 | 0.307203 | 0.758689 | 0.848127 |
| 17649 | LOC340357 | 0.159378631 | 0.584118338 | 2.087594 | 0.279805 | 0.779627 | 0.865855 |
| 17979 | POU3F4    | 0.109797503 | 0.584111881 | 2.794788 | 0.209    | 0.834448 | 0.909678 |
| 18027 | CCDC63    | 0.111888648 | 0.584110657 | 2.91407  | 0.200445 | 0.841133 | 0.914466 |
| 18028 | DMRTC1    | 0.091612751 | 0.584110412 | 2.91407  | 0.200445 | 0.841133 | 0.914466 |
| 3361  | METAP1    | 942.4280803 | 0.584010096 | 0.10119  | 5.771427 | 7.86E-09 | 4.58E-08 |
| 4413  | CREBL2    | 2981.337895 | 0.58397317  | 0.114643 | 5.093827 | 3.51E-07 | 1.56E-06 |
| 3922  | METTL4    | 241.3240725 | 0.583914558 | 0.108329 | 5.390208 | 7.04E-08 | 3.52E-07 |
| 9871  | SHROOM2   | 350.7054265 | 0.583859216 | 0.216523 | 2.696518 | 0.007007 | 0.013914 |
| 4329  | ATG4A     | 443.3328496 | 0.583779152 | 0.113526 | 5.14225  | 2.71E-07 | 1.23E-06 |
| 6936  | TMED5     | 3167.453037 | 0.583710759 | 0.151658 | 3.848871 | 0.000119 | 0.000335 |
| 3351  | ZNF75D    | 426.0802008 | 0.583652717 | 0.100987 | 5.779476 | 7.49E-09 | 4.38E-08 |
| 3388  | WDR7      | 589.3668503 | 0.583644892 | 0.101407 | 5.755477 | 8.64E-09 | 5.00E-08 |
| 11369 | COL27A1   | 739.818069  | 0.583605246 | 0.270029 | 2.161268 | 0.030675 | 0.052885 |
| 10230 | ST6GAL1   | 3102.488914 | 0.583538789 | 0.226901 | 2.571777 | 0.010118 | 0.019386 |
| 12426 | SLC28A1   | 2118.107307 | 0.583495091 | 0.319117 | 1.828468 | 0.067479 | 0.106443 |
| 5853  | KIAA1797  | 687.8177133 | 0.583479495 | 0.134318 | 4.344005 | 1.40E-05 | 4.69E-05 |
| 4087  | MIER3     | 644.8837911 | 0.583448212 | 0.110329 | 5.288249 | 1.23E-07 | 5.92E-07 |
| 11713 | KIAA0754  | 247.4312245 | 0.583436039 | 0.284766 | 2.048828 | 0.040479 | 0.067739 |
| 5205  | CWF19L2   | 391.0471479 | 0.583357579 | 0.124796 | 4.674502 | 2.95E-06 | 1.11E-05 |
| 5369  | IFIT5     | 837.9043591 | 0.583287362 | 0.127257 | 4.583538 | 4.57E-06 | 1.67E-05 |
| 6470  | PRKCI     | 941.4300239 | 0.583229088 | 0.144303 | 4.041698 | 5.31E-05 | 0.000161 |
| 7674  | SPHAR     | 147.507156  | 0.583183362 | 0.164307 | 3.549359 | 0.000386 | 0.000986 |
| 4846  | MAT2B     | 2484.236227 | 0.583178235 | 0.119779 | 4.868803 | 1.12E-06 | 4.54E-06 |
| 5294  | BDP1      | 949.587611  | 0.583139718 | 0.126099 | 4.624469 | 3.76E-06 | 1.39E-05 |
| 7965  | PGAP1     | 398.2036698 | 0.583105139 | 0.170368 | 3.422619 | 0.00062  | 0.001526 |
| 5665  | CAMK2D    | 1105.482621 | 0.583049303 | 0.13134  | 4.439237 | 9.03E-06 | 3.12E-05 |
| 7174  | PI4K2B    | 509.0531472 | 0.582631038 | 0.155204 | 3.753959 | 0.000174 | 0.000476 |
| 15374 | HPVC1     | 0.479600467 | 0.58209766  | 0.648525 | 0.897572 | 0.369414 | 0.470982 |
| 8098  | PRDM5     | 47.23949857 | 0.582081313 | 0.172654 | 3.371368 | 0.000748 | 0.00181  |
| 13470 | C17orf102 | 1.96751244  | 0.581723362 | 0.388603 | 1.496961 | 0.134403 | 0.195578 |
| 6227  | HERPUD1   | 6054.601632 | 0.581639652 | 0.139647 | 4.165063 | 3.11E-05 | 9.80E-05 |
| 5508  | MRPS28    | 306.1839894 | 0.581501723 | 0.128808 | 4.514467 | 6.35E-06 | 2.26E-05 |
| 2997  | RNF6      | 876.3043888 | 0.581393454 | 0.096359 | 6.03362  | 1.60E-09 | 1.05E-08 |
| 6362  | C14orf43  | 1444.053313 | 0.5811931   | 0.141891 | 4.09604  | 4.20E-05 | 0.000129 |
| 6460  | ZNF256    | 102.6092558 | 0.581081953 | 0.143672 | 4.044507 | 5.24E-05 | 0.000159 |
| 2381  | ACOX1     | 1601.654959 | 0.581028028 | 0.088332 | 6.577783 | 4.78E-11 | 3.93E-10 |
| 9927  | SMPDL3A   | 2338.056153 | 0.580892039 | 0.216877 | 2.678437 | 0.007397 | 0.014605 |
| 11292 | C10orf79  | 39.50271422 | 0.580567709 | 0.266272 | 2.180358 | 0.029231 | 0.05074  |

|       |           |             |             |          |          |          |          |
|-------|-----------|-------------|-------------|----------|----------|----------|----------|
| 1352  | MTPAP     | 459.2054317 | 0.580436448 | 0.074435 | 7.797876 | 6.30E-15 | 9.13E-14 |
| 9586  | PI4KAP2   | 162.3536671 | 0.58022989  | 0.208366 | 2.784673 | 0.005358 | 0.010956 |
| 3104  | TADA1     | 278.8848838 | 0.580209943 | 0.097324 | 5.961644 | 2.50E-09 | 1.58E-08 |
| 10241 | IL6ST     | 2016.85592  | 0.579829807 | 0.225635 | 2.569768 | 0.010177 | 0.019478 |
| 6490  | KCTD9     | 1057.767661 | 0.579826714 | 0.143795 | 4.032322 | 5.52E-05 | 0.000167 |
| 5608  | MKKS      | 1060.230301 | 0.579759073 | 0.129772 | 4.467532 | 7.91E-06 | 2.77E-05 |
| 10338 | RBM20     | 112.5356694 | 0.579466752 | 0.228695 | 2.533793 | 0.011284 | 0.021394 |
| 8127  | LOC728323 | 22.4454559  | 0.579395006 | 0.172428 | 3.360208 | 0.000779 | 0.001878 |
| 3506  | CBARA1    | 1545.673649 | 0.579302702 | 0.102222 | 5.667082 | 1.45E-08 | 8.12E-08 |
| 8435  | SH3BGR    | 78.39801332 | 0.579241839 | 0.179044 | 3.235193 | 0.001216 | 0.002825 |
| 2889  | ZNF595    | 167.0261526 | 0.579116323 | 0.094635 | 6.119482 | 9.39E-10 | 6.37E-09 |
| 7067  | C14orf118 | 223.6896712 | 0.579065074 | 0.152563 | 3.795575 | 0.000147 | 0.000409 |
| 6472  | ALG10B    | 371.8662557 | 0.578961576 | 0.143261 | 4.041302 | 5.32E-05 | 0.000161 |
| 8243  | HIPK2     | 9294.255382 | 0.578854262 | 0.174639 | 3.314577 | 0.000918 | 0.002182 |
| 4987  | ZNF268    | 407.3224988 | 0.578637195 | 0.121039 | 4.780577 | 1.75E-06 | 6.87E-06 |
| 6312  | KLHL28    | 359.2801534 | 0.577711834 | 0.140239 | 4.119469 | 3.80E-05 | 0.000118 |
| 5672  | LOC729176 | 28.43037599 | 0.577507241 | 0.130191 | 4.435839 | 9.17E-06 | 3.17E-05 |
| 11941 | NLGN1     | 538.861577  | 0.577219062 | 0.291751 | 1.978465 | 0.047876 | 0.078588 |
| 5703  | CHPT1     | 1187.316325 | 0.577149249 | 0.130595 | 4.419396 | 9.90E-06 | 3.40E-05 |
| 12677 | ZNF157    | 2.063739361 | 0.576857181 | 0.330446 | 1.745694 | 0.080864 | 0.125031 |
| 4430  | DCUN1D4   | 1165.8982   | 0.576805475 | 0.113465 | 5.083573 | 3.70E-07 | 1.64E-06 |
| 4498  | MGA       | 799.3127665 | 0.576581859 | 0.114408 | 5.039719 | 4.66E-07 | 2.03E-06 |
| 13309 | CRNA0011  | 1.197756485 | 0.576383192 | 0.374285 | 1.539957 | 0.123571 | 0.181991 |
| 5015  | HSDL1     | 594.1952686 | 0.57604046  | 0.120901 | 4.764557 | 1.89E-06 | 7.40E-06 |
| 2956  | ZNF17     | 133.1657825 | 0.575978381 | 0.094925 | 6.067725 | 1.30E-09 | 8.60E-09 |
| 14025 | KIAA2022  | 27.01794069 | 0.575921136 | 0.438955 | 1.312027 | 0.189511 | 0.264856 |
| 2873  | LOC400657 | 195.4500311 | 0.575870314 | 0.094002 | 6.126178 | 9.00E-10 | 6.14E-09 |
| 7416  | NAT1      | 119.0790728 | 0.575846878 | 0.157778 | 3.649726 | 0.000263 | 0.000694 |
| 3847  | TMEM168   | 701.5966535 | 0.5758245   | 0.10595  | 5.434876 | 5.48E-08 | 2.79E-07 |
| 6381  | KIF13A    | 746.1994413 | 0.575703136 | 0.140898 | 4.085971 | 4.39E-05 | 0.000135 |
| 4259  | ZSCAN2    | 278.0559072 | 0.575593283 | 0.111157 | 5.178199 | 2.24E-07 | 1.03E-06 |
| 5708  | FAM117B   | 419.3385714 | 0.575574196 | 0.130332 | 4.416212 | 1.00E-05 | 3.45E-05 |
| 8291  | PIH1D2    | 56.94395731 | 0.575531495 | 0.174531 | 3.297598 | 0.000975 | 0.002306 |
| 3408  | GOLGA7    | 1263.918364 | 0.575390686 | 0.100215 | 5.741583 | 9.38E-09 | 5.39E-08 |
| 4446  | AKTIP     | 893.988965  | 0.575331229 | 0.113363 | 5.075102 | 3.87E-07 | 1.71E-06 |
| 4005  | MRPL19    | 1149.429492 | 0.575107669 | 0.10773  | 5.338412 | 9.38E-08 | 4.59E-07 |
| 6101  | SETBP1    | 622.5165098 | 0.575065016 | 0.136224 | 4.221464 | 2.43E-05 | 7.80E-05 |
| 5526  | PEX26     | 505.7567894 | 0.574887611 | 0.127556 | 4.506939 | 6.58E-06 | 2.33E-05 |
| 4168  | OTUD7B    | 673.1130487 | 0.574881073 | 0.10978  | 5.236662 | 1.64E-07 | 7.69E-07 |
| 10929 | KIF6      | 16.34021538 | 0.574857292 | 0.248893 | 2.309654 | 0.020907 | 0.037497 |
| 7623  | UBXN7     | 318.5178718 | 0.574743937 | 0.161013 | 3.56955  | 0.000358 | 0.000919 |
| 790   | ATXN7L3E  | 2678.138753 | 0.57461467  | 0.065488 | 8.774317 | 1.72E-18 | 4.27E-17 |
| 4367  | GLO1      | 2393.055707 | 0.574541664 | 0.112179 | 5.121651 | 3.03E-07 | 1.36E-06 |
| 3069  | ENOPH1    | 1000.826014 | 0.574409029 | 0.096013 | 5.982616 | 2.20E-09 | 1.40E-08 |
| 5118  | LCLAT1    | 476.2680153 | 0.573967027 | 0.121643 | 4.718461 | 2.38E-06 | 9.10E-06 |
| 3207  | C14orf101 | 433.372824  | 0.573933308 | 0.097606 | 5.880081 | 4.10E-09 | 2.51E-08 |
| 2839  | INVS      | 293.7546493 | 0.573889231 | 0.093284 | 6.152037 | 7.65E-10 | 5.28E-09 |

|       |           |             |             |          |          |          |          |
|-------|-----------|-------------|-------------|----------|----------|----------|----------|
| 3556  | C1orf124  | 177.0743692 | 0.573661248 | 0.101873 | 5.631115 | 1.79E-08 | 9.87E-08 |
| 8450  | LATS1     | 366.2654863 | 0.572893802 | 0.177508 | 3.227426 | 0.001249 | 0.002897 |
| 10582 | STAG3L1   | 87.4809593  | 0.572817484 | 0.234601 | 2.441669 | 0.01462  | 0.02708  |
| 9722  | HOXD4     | 84.2186799  | 0.572515548 | 0.208878 | 2.740913 | 0.006127 | 0.012353 |
| 5179  | PHF3      | 1897.513302 | 0.572300981 | 0.122168 | 4.684532 | 2.81E-06 | 1.06E-05 |
| 6163  | ATM       | 1746.471935 | 0.572286038 | 0.136409 | 4.195357 | 2.72E-05 | 8.66E-05 |
| 10041 | C1orf88   | 216.5160156 | 0.572226198 | 0.216962 | 2.637445 | 0.008353 | 0.016306 |
| 3097  | ALS2      | 672.6698902 | 0.57222397  | 0.095919 | 5.965697 | 2.44E-09 | 1.54E-08 |
| 10626 | LOC441455 | 4.380842365 | 0.571778955 | 0.235921 | 2.423608 | 0.015367 | 0.028347 |
| 9796  | DHCR7     | 695.5008877 | 0.571621777 | 0.210314 | 2.717942 | 0.006569 | 0.013144 |
| 3392  | ZNF41     | 283.5437812 | 0.571510518 | 0.099339 | 5.753139 | 8.76E-09 | 5.06E-08 |
| 6723  | ZNF625    | 26.4870966  | 0.571489022 | 0.145341 | 3.932057 | 8.42E-05 | 0.000246 |
| 4340  | C5orf53   | 476.797793  | 0.571226061 | 0.111191 | 5.137326 | 2.79E-07 | 1.26E-06 |
| 3999  | C11orf30  | 366.6410683 | 0.571115861 | 0.106933 | 5.340859 | 9.25E-08 | 4.53E-07 |
| 13272 | C10orf93  | 14.26897806 | 0.5708468   | 0.367203 | 1.554579 | 0.120046 | 0.177293 |
| 12454 | OC1003026 | 144.7967436 | 0.570756723 | 0.31372  | 1.819317 | 0.068863 | 0.108382 |
| 6696  | LCORL     | 95.60779479 | 0.570477767 | 0.144727 | 3.941753 | 8.09E-05 | 0.000237 |
| 5613  | DEPDC5    | 287.7472347 | 0.570169374 | 0.127664 | 4.466182 | 7.96E-06 | 2.78E-05 |
| 8081  | HOXD8     | 557.427531  | 0.570017408 | 0.168715 | 3.378574 | 0.000729 | 0.001767 |
| 13803 | ADH1C     | 9.121217282 | 0.569957035 | 0.411092 | 1.386447 | 0.165611 | 0.235176 |
| 7479  | C5orf32   | 2612.946097 | 0.569920721 | 0.157295 | 3.623268 | 0.000291 | 0.000762 |
| 6721  | ATP5G3    | 4118.191581 | 0.569801074 | 0.144891 | 3.932627 | 8.40E-05 | 0.000245 |
| 4437  | SPATA7    | 235.7944387 | 0.569283183 | 0.112067 | 5.079851 | 3.78E-07 | 1.67E-06 |
| 7372  | RNF5P1    | 245.5984372 | 0.569262214 | 0.155134 | 3.66948  | 0.000243 | 0.000646 |
| 5555  | MOCS2     | 1221.243145 | 0.569203491 | 0.126581 | 4.496768 | 6.90E-06 | 2.43E-05 |
| 5275  | TOLLIP    | 2033.721314 | 0.569068974 | 0.122669 | 4.639063 | 3.50E-06 | 1.30E-05 |
| 12590 | C4orf37   | 1.440954402 | 0.568959713 | 0.32023  | 1.776719 | 0.075614 | 0.117722 |
| 7237  | IPW       | 566.3316049 | 0.568783978 | 0.152489 | 3.729992 | 0.000191 | 0.000519 |
| 12963 | HIST1H3H  | 11.28663571 | 0.568655578 | 0.343832 | 1.653875 | 0.098153 | 0.148414 |
| 13960 | TDRD1     | 1.196391499 | 0.568586584 | 0.427038 | 1.331465 | 0.183036 | 0.256998 |
| 14255 | FAM151A   | 192.935958  | 0.568582295 | 0.457998 | 1.241453 | 0.214439 | 0.294872 |
| 4303  | ZNF808    | 252.2525378 | 0.568550486 | 0.110281 | 5.155449 | 2.53E-07 | 1.15E-06 |
| 8727  | CTH       | 81.85838014 | 0.568545496 | 0.182392 | 3.117169 | 0.001826 | 0.004101 |
| 2000  | GLYR1     | 2318.478033 | 0.568173643 | 0.081668 | 6.957083 | 3.47E-12 | 3.40E-11 |
| 11648 | PCDHGA3   | 17.3085298  | 0.56812327  | 0.275596 | 2.061438 | 0.039261 | 0.066068 |
| 4295  | SPATA5    | 180.4646066 | 0.568071081 | 0.110108 | 5.159213 | 2.48E-07 | 1.13E-06 |
| 4989  | NOC3L     | 436.0361645 | 0.568024362 | 0.118835 | 4.779944 | 1.75E-06 | 6.89E-06 |
| 10162 | SPNS2     | 1509.818425 | 0.568001045 | 0.218893 | 2.594874 | 0.009463 | 0.018252 |
| 4464  | COG6      | 620.9261121 | 0.567703232 | 0.112183 | 5.060495 | 4.18E-07 | 1.84E-06 |
| 6974  | AMFR      | 3484.926415 | 0.567660976 | 0.147986 | 3.835899 | 0.000125 | 0.000352 |
| 10814 | OC1002407 | 20.5475891  | 0.5674283   | 0.240716 | 2.357248 | 0.018411 | 0.033371 |
| 3826  | MED23     | 698.4705948 | 0.567348423 | 0.104103 | 5.449891 | 5.04E-08 | 2.58E-07 |
| 12491 | ADSSL1    | 1420.804415 | 0.567026349 | 0.313925 | 1.806247 | 0.07088  | 0.111213 |
| 6813  | BMPR2     | 3476.848863 | 0.566907374 | 0.145581 | 3.894105 | 9.86E-05 | 0.000284 |
| 1649  | COG3      | 687.4731904 | 0.566707545 | 0.076994 | 7.360416 | 1.83E-13 | 2.18E-12 |
| 6124  | USP37     | 532.9160965 | 0.566421322 | 0.134543 | 4.209967 | 2.55E-05 | 8.17E-05 |
| 10844 | TBX3      | 205.9922466 | 0.566341056 | 0.241733 | 2.342839 | 0.019138 | 0.034592 |

|       |           |             |             |          |          |          |          |
|-------|-----------|-------------|-------------|----------|----------|----------|----------|
| 13572 | CDK15     | 1.785337106 | 0.566172085 | 0.386892 | 1.463386 | 0.143362 | 0.207046 |
| 7483  | DPY19L4   | 1098.618969 | 0.565917914 | 0.156244 | 3.62202  | 0.000292 | 0.000766 |
| 3018  | C13orf1   | 387.5712399 | 0.565750718 | 0.093955 | 6.021493 | 1.73E-09 | 1.12E-08 |
| 6412  | ANKMY2    | 678.4923633 | 0.565723157 | 0.138963 | 4.071027 | 4.68E-05 | 0.000143 |
| 5959  | KIAA1033  | 2002.439127 | 0.565491295 | 0.131932 | 4.286232 | 1.82E-05 | 5.98E-05 |
| 4320  | TOR1AIP1  | 2037.353986 | 0.565439484 | 0.109867 | 5.146565 | 2.65E-07 | 1.20E-06 |
| 3223  | KIAA0831  | 532.9559533 | 0.565312798 | 0.096285 | 5.871268 | 4.32E-09 | 2.63E-08 |
| 8180  | CBX6      | 594.7399887 | 0.564801926 | 0.168957 | 3.342865 | 0.000829 | 0.001987 |
| 5105  | BCAR3     | 402.9012415 | 0.56470266  | 0.119476 | 4.726501 | 2.28E-06 | 8.77E-06 |
| 11790 | LOC441454 | 2.605238306 | 0.564609054 | 0.278805 | 2.0251   | 0.042857 | 0.07125  |
| 5497  | FAM45A    | 455.1344254 | 0.564110204 | 0.124716 | 4.523159 | 6.09E-06 | 2.17E-05 |
| 3949  | LUZP1     | 1213.747561 | 0.563824667 | 0.1049   | 5.374882 | 7.66E-08 | 3.80E-07 |
| 13147 | LOC284749 | 63.80923508 | 0.563771477 | 0.353286 | 1.595794 | 0.110535 | 0.164797 |
| 4559  | SENP6     | 1514.303396 | 0.563627516 | 0.112617 | 5.004802 | 5.59E-07 | 2.40E-06 |
| 3681  | C2orf60   | 218.6964967 | 0.563488975 | 0.101549 | 5.548948 | 2.87E-08 | 1.53E-07 |
| 4420  | IMPACT    | 879.3941792 | 0.563487011 | 0.110699 | 5.090265 | 3.58E-07 | 1.59E-06 |
| 12340 | PCDHA3    | 41.1784738  | 0.563420066 | 0.304326 | 1.851368 | 0.064117 | 0.101844 |
| 2825  | TADA2B    | 892.7985217 | 0.563371168 | 0.091368 | 6.165926 | 7.01E-10 | 4.86E-09 |
| 5929  | PI4KA     | 1609.02665  | 0.563338711 | 0.130802 | 4.30681  | 1.66E-05 | 5.48E-05 |
| 10046 | EXOC3L2   | 465.051877  | 0.563236415 | 0.213682 | 2.635862 | 0.008392 | 0.016375 |
| 5047  | ANKRD13C  | 625.6189421 | 0.563138592 | 0.11858  | 4.749016 | 2.04E-06 | 7.94E-06 |
| 6310  | THNSL1    | 324.9963108 | 0.5628298   | 0.136589 | 4.120612 | 3.78E-05 | 0.000117 |
| 4645  | FBXW11    | 1464.323167 | 0.562816507 | 0.113374 | 4.96424  | 6.90E-07 | 2.91E-06 |
| 14407 | LRRN2     | 258.9000005 | 0.562613467 | 0.470441 | 1.195929 | 0.231724 | 0.315265 |
| 4808  | KIAA1712  | 300.2592473 | 0.5622567   | 0.115123 | 4.883982 | 1.04E-06 | 4.24E-06 |
| 5845  | GRHPR     | 1801.927347 | 0.562154731 | 0.129283 | 4.348234 | 1.37E-05 | 4.60E-05 |
| 4708  | NCOR1     | 2092.876972 | 0.562019925 | 0.114038 | 4.92836  | 8.29E-07 | 3.45E-06 |
| 9177  | PRRG4     | 320.6762918 | 0.561818361 | 0.190639 | 2.947021 | 0.003209 | 0.006853 |
| 6449  | SIAE      | 1927.94526  | 0.560985091 | 0.138503 | 4.05035  | 5.11E-05 | 0.000155 |
| 1713  | ZDHHC6    | 828.8686872 | 0.560975812 | 0.077005 | 7.284944 | 3.22E-13 | 3.68E-12 |
| 5176  | PDS5B     | 793.670755  | 0.56088793  | 0.119691 | 4.686125 | 2.78E-06 | 1.05E-05 |
| 5466  | GRPEL2    | 645.7121488 | 0.560818157 | 0.123651 | 4.535504 | 5.75E-06 | 2.06E-05 |
| 7150  | SPRY3     | 79.38120455 | 0.560792117 | 0.148975 | 3.764346 | 0.000167 | 0.000458 |
| 8163  | BIVM      | 1370.077458 | 0.560706458 | 0.167526 | 3.346988 | 0.000817 | 0.001962 |
| 6126  | ARMC1     | 720.1624064 | 0.560653302 | 0.133222 | 4.208414 | 2.57E-05 | 8.23E-05 |
| 2425  | C15orf17  | 1306.896105 | 0.560611967 | 0.085761 | 6.536907 | 6.28E-11 | 5.08E-10 |
| 6262  | SLC44A1   | 1822.516778 | 0.560570035 | 0.135051 | 4.150817 | 3.31E-05 | 0.000104 |
| 12325 | FAM194A   | 1.445231894 | 0.560425142 | 0.301757 | 1.857204 | 0.063282 | 0.10064  |
| 2476  | FBXO7     | 2664.430369 | 0.560141447 | 0.086276 | 6.492415 | 8.45E-11 | 6.69E-10 |
| 5106  | MTX3      | 612.5773568 | 0.560074794 | 0.118515 | 4.725765 | 2.29E-06 | 8.80E-06 |
| 3165  | MTCH2     | 1968.117497 | 0.559722255 | 0.094727 | 5.90879  | 3.45E-09 | 2.13E-08 |
| 5357  | C3orf23   | 654.6035651 | 0.559582478 | 0.121972 | 4.587809 | 4.48E-06 | 1.64E-05 |
| 6859  | RGPD3     | 246.8205359 | 0.559383883 | 0.144257 | 3.877679 | 0.000105 | 0.000301 |
| 3418  | PROSC     | 1252.14659  | 0.559346875 | 0.097539 | 5.734621 | 9.77E-09 | 5.60E-08 |
| 8514  | HOOK2     | 451.0062386 | 0.559307049 | 0.17481  | 3.199522 | 0.001377 | 0.003169 |
| 6588  | KBTBD6    | 383.5129466 | 0.559169638 | 0.140229 | 3.987556 | 6.68E-05 | 0.000199 |
| 4027  | ALAD      | 1153.684298 | 0.559121728 | 0.10506  | 5.321914 | 1.03E-07 | 5.00E-07 |

|       |           |             |             |          |          |          |          |
|-------|-----------|-------------|-------------|----------|----------|----------|----------|
| 3957  | PEX12     | 269.6689573 | 0.558905752 | 0.104043 | 5.371886 | 7.79E-08 | 3.86E-07 |
| 3928  | RFC1      | 1328.175095 | 0.558583599 | 0.103739 | 5.384512 | 7.26E-08 | 3.62E-07 |
| 4854  | RAB5A     | 1170.479418 | 0.558565642 | 0.114888 | 4.861836 | 1.16E-06 | 4.70E-06 |
| 4450  | ITCH      | 1528.981756 | 0.558543808 | 0.110127 | 5.071833 | 3.94E-07 | 1.74E-06 |
| 4059  | ATXN1L    | 1455.373133 | 0.558196121 | 0.105287 | 5.30165  | 1.15E-07 | 5.54E-07 |
| 6062  | LETM1     | 956.0880739 | 0.558148097 | 0.131675 | 4.238843 | 2.25E-05 | 7.26E-05 |
| 4749  | ZNF44     | 278.976894  | 0.55792462  | 0.113644 | 4.909396 | 9.14E-07 | 3.77E-06 |
| 5396  | ANAPC13   | 1177.092495 | 0.557883403 | 0.122142 | 4.567486 | 4.94E-06 | 1.79E-05 |
| 9335  | ST3GAL1   | 2197.574618 | 0.557827104 | 0.193396 | 2.884383 | 0.003922 | 0.008235 |
| 14333 | DPEP1     | 192.5815438 | 0.557800209 | 0.456742 | 1.221259 | 0.221988 | 0.303578 |
| 2481  | RBM23     | 1110.674441 | 0.557699016 | 0.085957 | 6.488115 | 8.69E-11 | 6.87E-10 |
| 7472  | ARMCX2    | 974.1241453 | 0.557163104 | 0.153589 | 3.627625 | 0.000286 | 0.00075  |
| 5837  | NIPSNAP1  | 2147.529229 | 0.556892465 | 0.127913 | 4.353696 | 1.34E-05 | 4.50E-05 |
| 3443  | FEM1A     | 826.7359677 | 0.556615745 | 0.097439 | 5.712438 | 1.11E-08 | 6.34E-08 |
| 5782  | CIRH1A    | 1307.455678 | 0.556204205 | 0.126948 | 4.381346 | 1.18E-05 | 4.00E-05 |
| 6975  | TNFSF13   | 1276.512452 | 0.556153852 | 0.144998 | 3.8356   | 0.000125 | 0.000352 |
| 8395  | STT3B     | 1422.841866 | 0.55587707  | 0.171048 | 3.249832 | 0.001155 | 0.002696 |
| 3423  | ARHGEF9   | 585.8042822 | 0.555785181 | 0.097058 | 5.726315 | 1.03E-08 | 5.88E-08 |
| 8909  | PRDX2     | 3509.977881 | 0.555785028 | 0.182337 | 3.048122 | 0.002303 | 0.005066 |
| 3836  | USP14     | 1186.441864 | 0.555711741 | 0.102112 | 5.442155 | 5.26E-08 | 2.69E-07 |
| 4539  | STAM      | 569.6712842 | 0.555409307 | 0.110751 | 5.014927 | 5.31E-07 | 2.29E-06 |
| 4542  | CEP68     | 785.1467755 | 0.555128772 | 0.11075  | 5.012456 | 5.37E-07 | 2.32E-06 |
| 15722 | CXADRP3   | 0.528838638 | 0.554945417 | 0.695984 | 0.797354 | 0.425246 | 0.53013  |
| 2599  | SFRS2B    | 1347.113537 | 0.554914608 | 0.086961 | 6.381166 | 1.76E-10 | 1.33E-09 |
| 10695 | SH2D1B    | 28.43886579 | 0.554481702 | 0.231102 | 2.399292 | 0.016427 | 0.030107 |
| 9381  | CCDC89    | 70.90192643 | 0.55447757  | 0.193426 | 2.866611 | 0.004149 | 0.008669 |
| 14210 | CACNA1S   | 1.310442715 | 0.55436517  | 0.442188 | 1.253687 | 0.209956 | 0.289609 |
| 13101 | ALPL      | 1816.086734 | 0.554302668 | 0.34409  | 1.610925 | 0.107196 | 0.160381 |
| 14919 | LOC389332 | 201.4273461 | 0.554124592 | 0.537665 | 1.030613 | 0.302722 | 0.397725 |
| 5091  | OPA3      | 753.2397777 | 0.554073888 | 0.117147 | 4.729718 | 2.25E-06 | 8.65E-06 |
| 2775  | AQR       | 895.0176948 | 0.554002804 | 0.089131 | 6.215637 | 5.11E-10 | 3.61E-09 |
| 11718 | RIMKLA    | 650.4259164 | 0.55394339  | 0.270616 | 2.046974 | 0.040661 | 0.068014 |
| 6236  | RB1CC1    | 1488.298224 | 0.553869739 | 0.133102 | 4.161254 | 3.17E-05 | 9.95E-05 |
| 12786 | BACE2     | 2714.69048  | 0.553756169 | 0.324167 | 1.708244 | 0.087591 | 0.134278 |
| 4985  | ZXDA      | 81.99447978 | 0.553668063 | 0.11578  | 4.782052 | 1.74E-06 | 6.82E-06 |
| 2498  | USP30     | 476.3732252 | 0.553483696 | 0.08563  | 6.463702 | 1.02E-10 | 8.02E-10 |
| 2953  | UTP3      | 721.4235293 | 0.553423434 | 0.091192 | 6.06874  | 1.29E-09 | 8.56E-09 |
| 9599  | NEDD9     | 2711.689596 | 0.553415066 | 0.199076 | 2.779913 | 0.005437 | 0.011103 |
| 4514  | PDCL      | 495.3741428 | 0.553342369 | 0.110054 | 5.027925 | 4.96E-07 | 2.15E-06 |
| 12809 | LOC391322 | 8.105025367 | 0.55296823  | 0.324907 | 1.701929 | 0.088769 | 0.135838 |
| 12079 | FNDC5     | 16.20723713 | 0.552942996 | 0.285803 | 1.934698 | 0.053027 | 0.086049 |
| 8732  | ESRRA     | 1438.748101 | 0.552914488 | 0.177471 | 3.115519 | 0.001836 | 0.004121 |
| 4605  | MTRF1     | 143.8934369 | 0.55276755  | 0.110836 | 4.98726  | 6.12E-07 | 2.61E-06 |
| 2939  | ARMCX5    | 279.8433751 | 0.552535083 | 0.090906 | 6.078083 | 1.22E-09 | 8.11E-09 |
| 5866  | ZNF675    | 121.586198  | 0.552528356 | 0.127393 | 4.337206 | 1.44E-05 | 4.82E-05 |
| 8234  | CNKSR3    | 888.05011   | 0.552180225 | 0.16644  | 3.317594 | 0.000908 | 0.002161 |
| 7673  | C14orf147 | 932.3310549 | 0.552171814 | 0.155545 | 3.549914 | 0.000385 | 0.000984 |

|       |         |             |             |          |          |          |          |
|-------|---------|-------------|-------------|----------|----------|----------|----------|
| 1563  | MTFMT   | 219.8415127 | 0.552067934 | 0.07385  | 7.47551  | 7.69E-14 | 9.64E-13 |
| 4266  | SNX2    | 2031.071508 | 0.552040453 | 0.106705 | 5.17352  | 2.30E-07 | 1.06E-06 |
| 3891  | NDUFS2  | 2175.123406 | 0.55161324  | 0.101996 | 5.408191 | 6.37E-08 | 3.21E-07 |
| 3309  | RDH14   | 466.9744572 | 0.551595197 | 0.094924 | 5.810908 | 6.21E-09 | 3.68E-08 |
| 7560  | SGTB    | 369.7281844 | 0.551302055 | 0.153476 | 3.59211  | 0.000328 | 0.00085  |
| 3101  | ZNF451  | 650.6306248 | 0.55123099  | 0.092446 | 5.962716 | 2.48E-09 | 1.57E-08 |
| 10131 | CCDC39  | 17.09531492 | 0.550859488 | 0.211464 | 2.604979 | 0.009188 | 0.017777 |
| 16830 | CCDC33  | 0.659798639 | 0.550718536 | 1.139255 | 0.483402 | 0.62881  | 0.732341 |
| 14135 | IP6K3   | 135.0908172 | 0.550410474 | 0.430911 | 1.277318 | 0.20149  | 0.279406 |
| 4107  | KRR1    | 685.3212306 | 0.550282986 | 0.104255 | 5.278233 | 1.30E-07 | 6.23E-07 |
| 2334  | RNF146  | 695.7925364 | 0.550203113 | 0.083113 | 6.619961 | 3.59E-11 | 3.02E-10 |
| 6493  | MAP3K1  | 920.7354908 | 0.550182962 | 0.136481 | 4.031202 | 5.55E-05 | 0.000167 |
| 4025  | UFM1    | 2303.233731 | 0.54999007  | 0.103279 | 5.325309 | 1.01E-07 | 4.91E-07 |
| 5589  | RNF5    | 1564.875791 | 0.549831758 | 0.122743 | 4.47952  | 7.48E-06 | 2.62E-05 |
| 8362  | REP15   | 31.8813715  | 0.549640305 | 0.168266 | 3.266506 | 0.001089 | 0.002552 |
| 12305 | FOXQ1   | 158.7929619 | 0.549584223 | 0.294894 | 1.863669 | 0.062368 | 0.099348 |
| 8634  | CHAC2   | 31.15710284 | 0.549564339 | 0.173919 | 3.159889 | 0.001578 | 0.003583 |
| 3627  | COMMD2  | 849.0322909 | 0.549316119 | 0.09831  | 5.587603 | 2.30E-08 | 1.24E-07 |
| 13072 | CCL15   | 121.2489999 | 0.549269299 | 0.338652 | 1.621927 | 0.104819 | 0.157172 |
| 11733 | TXK     | 42.88725861 | 0.549248396 | 0.268929 | 2.042352 | 0.041117 | 0.068689 |
| 7482  | VHAMML  | 190.8766369 | 0.548746294 | 0.15148  | 3.62256  | 0.000292 | 0.000764 |
| 9407  | GTF2A1  | 186.1439384 | 0.548693325 | 0.192148 | 2.855575 | 0.004296 | 0.008951 |
| 12744 | FAM86B2 | 9.322824436 | 0.548649716 | 0.319118 | 1.719272 | 0.085565 | 0.131604 |
| 10398 | HNF1B   | 2380.083179 | 0.548594585 | 0.218731 | 2.508075 | 0.012139 | 0.022882 |
| 2707  | MAP2K4  | 778.8666541 | 0.54854751  | 0.087428 | 6.274241 | 3.51E-10 | 2.54E-09 |
| 4426  | ZMYM1   | 232.1321895 | 0.548491564 | 0.107825 | 5.086853 | 3.64E-07 | 1.61E-06 |
| 11296 | PALM2   | 75.07488167 | 0.548481434 | 0.251685 | 2.179237 | 0.029314 | 0.050866 |
| 6746  | ZNF596  | 98.58639704 | 0.548348881 | 0.13983  | 3.921552 | 8.80E-05 | 0.000256 |
| 7245  | GNAI1   | 981.4954261 | 0.548306283 | 0.147086 | 3.727791 | 0.000193 | 0.000523 |
| 3814  | TRIM33  | 1071.381098 | 0.548220436 | 0.100327 | 5.464344 | 4.65E-08 | 2.39E-07 |
| 5858  | PRDM4   | 1110.768961 | 0.548175591 | 0.126256 | 4.341765 | 1.41E-05 | 4.73E-05 |
| 16464 | MYH1    | 0.507633059 | 0.547718383 | 0.93939  | 0.583058 | 0.559854 | 0.666527 |
| 7765  | PHF17   | 1934.017331 | 0.547644259 | 0.155954 | 3.511579 | 0.000445 | 0.001124 |
| 6760  | HMGCR   | 804.0493623 | 0.547393919 | 0.139793 | 3.91575  | 9.01E-05 | 0.000261 |
| 5292  | SFRS14  | 1191.450971 | 0.54726267  | 0.118322 | 4.625205 | 3.74E-06 | 1.39E-05 |
| 3211  | FUBP3   | 1109.903382 | 0.546889777 | 0.093022 | 5.879113 | 4.12E-09 | 2.52E-08 |
| 4240  | VDAC3   | 1782.699967 | 0.546741148 | 0.10542  | 5.186298 | 2.15E-07 | 9.92E-07 |
| 4812  | TTC12   | 237.0170453 | 0.546623481 | 0.111952 | 4.882648 | 1.05E-06 | 4.26E-06 |
| 5653  | TTC37   | 1845.320851 | 0.546585206 | 0.122936 | 4.446102 | 8.74E-06 | 3.03E-05 |
| 4412  | ZNF780A | 294.2048804 | 0.546574672 | 0.107294 | 5.0942   | 3.50E-07 | 1.56E-06 |
| 10593 | C3orf15 | 180.518779  | 0.546486144 | 0.224114 | 2.438427 | 0.014751 | 0.027295 |
| 10416 | ACSM3   | 680.1161694 | 0.54627878  | 0.218065 | 2.505114 | 0.012241 | 0.023036 |
| 5764  | CCBL2   | 442.9924346 | 0.54616041  | 0.124438 | 4.389006 | 1.14E-05 | 3.87E-05 |
| 13899 | GDPD4   | 2.120996539 | 0.545900282 | 0.404581 | 1.349299 | 0.177241 | 0.249953 |
| 8073  | CCNI    | 5928.876348 | 0.545789163 | 0.161317 | 3.383329 | 0.000716 | 0.001739 |
| 8472  | CYP2U1  | 397.4670378 | 0.545634037 | 0.16953  | 3.218511 | 0.001289 | 0.002981 |
| 6481  | GALNT4  | 635.8548228 | 0.545296183 | 0.135099 | 4.036268 | 5.43E-05 | 0.000164 |

|       |           |             |             |          |          |          |          |
|-------|-----------|-------------|-------------|----------|----------|----------|----------|
| 8023  | RGL1      | 1774.968939 | 0.544965907 | 0.160188 | 3.402036 | 0.000669 | 0.001634 |
| 5156  | C1orf55   | 660.9513247 | 0.54470518  | 0.115932 | 4.698495 | 2.62E-06 | 9.96E-06 |
| 11626 | OCLM      | 4.476465574 | 0.544310368 | 0.263    | 2.06962  | 0.038488 | 0.064889 |
| 13852 | PRODH2    | 381.4163526 | 0.544094802 | 0.397765 | 1.367881 | 0.171349 | 0.242464 |
| 692   | TRIP4     | 561.0256421 | 0.543937655 | 0.0602   | 9.035487 | 1.63E-19 | 4.62E-18 |
| 6002  | CBLL1     | 756.5691592 | 0.543894065 | 0.127508 | 4.265554 | 1.99E-05 | 6.51E-05 |
| 5053  | ZC3H13    | 1333.611209 | 0.543836948 | 0.114611 | 4.745088 | 2.08E-06 | 8.08E-06 |
| 11049 | DNAJB7    | 2.996381223 | 0.54351462  | 0.239061 | 2.273538 | 0.022994 | 0.040791 |
| 6368  | ZNF550    | 195.5552369 | 0.543459017 | 0.132728 | 4.094527 | 4.23E-05 | 0.00013  |
| 6082  | ZNF518A   | 652.2242614 | 0.543358803 | 0.128516 | 4.227954 | 2.36E-05 | 7.60E-05 |
| 10109 | ZFP37     | 82.58056704 | 0.54295183  | 0.207723 | 2.613824 | 0.008954 | 0.017361 |
| 6492  | C14orf21  | 225.5597993 | 0.542917341 | 0.134678 | 4.031218 | 5.55E-05 | 0.000167 |
| 8695  | STARD4    | 203.2667286 | 0.542867267 | 0.173332 | 3.131945 | 0.001737 | 0.003915 |
| 10016 | FLJ35390  | 132.2346396 | 0.542771222 | 0.205099 | 2.646392 | 0.008136 | 0.015921 |
| 9482  | PALMD     | 523.2815452 | 0.542688815 | 0.192066 | 2.825528 | 0.00472  | 0.009758 |
| 5936  | ATP6V1E1  | 3375.956288 | 0.542538586 | 0.126177 | 4.299822 | 1.71E-05 | 5.64E-05 |
| 6304  | CCPG1     | 3465.3047   | 0.542486238 | 0.131527 | 4.124512 | 3.72E-05 | 0.000116 |
| 5434  | SFRS2IP   | 2998.004051 | 0.542438629 | 0.119189 | 4.551066 | 5.34E-06 | 1.93E-05 |
| 6206  | SLC20A2   | 563.5131028 | 0.542201985 | 0.129892 | 4.174249 | 2.99E-05 | 9.44E-05 |
| 5428  | KIAA0649  | 674.905796  | 0.542021695 | 0.119039 | 4.553316 | 5.28E-06 | 1.91E-05 |
| 13588 | TNNC1     | 4.890515956 | 0.541942018 | 0.371583 | 1.458469 | 0.144711 | 0.20875  |
| 5144  | UBR2      | 804.5570963 | 0.541766799 | 0.115134 | 4.705528 | 2.53E-06 | 9.65E-06 |
| 14234 | COLEC12   | 309.4487402 | 0.541756294 | 0.434183 | 1.24776  | 0.212119 | 0.2921   |
| 7709  | FLVCR1    | 121.0726412 | 0.541553735 | 0.153136 | 3.536426 | 0.000406 | 0.001031 |
| 5661  | PIGW      | 175.5355402 | 0.541283644 | 0.121851 | 4.442183 | 8.91E-06 | 3.08E-05 |
| 7523  | NEK7      | 1752.397855 | 0.541184735 | 0.150048 | 3.606756 | 0.00031  | 0.000808 |
| 4325  | NFE2L2    | 3295.081881 | 0.540769841 | 0.105133 | 5.143655 | 2.69E-07 | 1.22E-06 |
| 7257  | SESN1     | 756.6234521 | 0.540602424 | 0.145221 | 3.722608 | 0.000197 | 0.000533 |
| 12627 | TMC1      | 1.492261823 | 0.540432957 | 0.306217 | 1.764869 | 0.077586 | 0.120437 |
| 5827  | C14orf126 | 226.9884539 | 0.540414065 | 0.123988 | 4.358607 | 1.31E-05 | 4.40E-05 |
| 5088  | CYTSA     | 1366.172381 | 0.540407746 | 0.114252 | 4.729947 | 2.25E-06 | 8.65E-06 |
| 3984  | PSEN1     | 1858.20283  | 0.540360898 | 0.100965 | 5.351956 | 8.70E-08 | 4.28E-07 |
| 11224 | CLDN4     | 2130.872596 | 0.540304194 | 0.244319 | 2.211474 | 0.027003 | 0.047157 |
| 12083 | PZP       | 2.695738004 | 0.540236591 | 0.279536 | 1.932619 | 0.053283 | 0.086436 |
| 3865  | ATXN3     | 352.7934922 | 0.539979731 | 0.099536 | 5.424956 | 5.80E-08 | 2.94E-07 |
| 11276 | MGAT5     | 270.9767004 | 0.539939534 | 0.246772 | 2.188014 | 0.028669 | 0.049834 |
| 4966  | C11orf46  | 613.2601381 | 0.539849781 | 0.112708 | 4.789788 | 1.67E-06 | 6.59E-06 |
| 7478  | PAWR      | 224.1544415 | 0.539836123 | 0.148988 | 3.623364 | 0.000291 | 0.000762 |
| 4421  | KIAA1217  | 1848.950386 | 0.539685667 | 0.106038 | 5.08955  | 3.59E-07 | 1.59E-06 |
| 3862  | API5      | 2133.841153 | 0.539399406 | 0.099407 | 5.426174 | 5.76E-08 | 2.92E-07 |
| 7353  | FLJ10357  | 1006.979441 | 0.539358291 | 0.14663  | 3.678367 | 0.000235 | 0.000626 |
| 8647  | CHKA      | 404.4392086 | 0.53925552  | 0.17107  | 3.152251 | 0.00162  | 0.003673 |
| 6767  | AGAP1     | 432.0589797 | 0.539220091 | 0.137854 | 3.911533 | 9.17E-05 | 0.000266 |
| 4400  | PPIG      | 1025.57301  | 0.539026005 | 0.105635 | 5.102708 | 3.35E-07 | 1.49E-06 |
| 5768  | TOP2B     | 2109.838024 | 0.538736486 | 0.122769 | 4.388202 | 1.14E-05 | 3.88E-05 |
| 11200 | HIST1H3E  | 40.34690748 | 0.538607551 | 0.242467 | 2.221365 | 0.026326 | 0.046073 |
| 6793  | GGA2      | 2452.11132  | 0.538497683 | 0.137977 | 3.902819 | 9.51E-05 | 0.000274 |

|       |           |             |             |          |          |          |          |
|-------|-----------|-------------|-------------|----------|----------|----------|----------|
| 1503  | GLOD4     | 1292.155429 | 0.538482799 | 0.071229 | 7.559903 | 4.03E-14 | 5.26E-13 |
| 6333  | UBE2Q2    | 1054.582145 | 0.538301407 | 0.130925 | 4.111533 | 3.93E-05 | 0.000122 |
| 3528  | ATP6V1G1  | 2238.527362 | 0.538073171 | 0.095211 | 5.651396 | 1.59E-08 | 8.84E-08 |
| 2762  | DDX5      | 10468.19551 | 0.538025338 | 0.086405 | 6.226754 | 4.76E-10 | 3.38E-09 |
| 12239 | ARC       | 42.64792414 | 0.537985637 | 0.285373 | 1.885203 | 0.059402 | 0.095134 |
| 12613 | FLRT1     | 8.466374901 | 0.537894043 | 0.304341 | 1.767406 | 0.07716  | 0.1199   |
| 3630  | ZNF234    | 175.3519379 | 0.537348669 | 0.096217 | 5.584745 | 2.34E-08 | 1.26E-07 |
| 9638  | LASS4     | 946.3169441 | 0.537333614 | 0.194238 | 2.766363 | 0.005669 | 0.011528 |
| 7332  | ASAP2     | 1257.071649 | 0.536925571 | 0.145596 | 3.687788 | 0.000226 | 0.000605 |
| 5514  | RAB9A     | 571.9105699 | 0.53691438  | 0.118953 | 4.513661 | 6.37E-06 | 2.27E-05 |
| 4818  | TEAD1     | 2211.253839 | 0.536668296 | 0.109966 | 4.88033  | 1.06E-06 | 4.31E-06 |
| 4544  | BCLAF1    | 2736.404914 | 0.536290869 | 0.107005 | 5.011838 | 5.39E-07 | 2.33E-06 |
| 4717  | NUP160    | 1237.379205 | 0.536249713 | 0.108918 | 4.923432 | 8.50E-07 | 3.53E-06 |
| 10873 | RAP1GAP2  | 332.4108942 | 0.536103445 | 0.229929 | 2.331603 | 0.019722 | 0.035553 |
| 8117  | SPEF2     | 285.5777862 | 0.53605809  | 0.159379 | 3.363422 | 0.00077  | 0.001859 |
| 3898  | TMEM128   | 604.4881577 | 0.536001353 | 0.099171 | 5.40482  | 6.49E-08 | 3.26E-07 |
| 8655  | RRM2B     | 2051.344277 | 0.535634668 | 0.170125 | 3.148486 | 0.001641 | 0.003717 |
| 7248  | TM9SF2    | 3961.723499 | 0.535586948 | 0.143738 | 3.726123 | 0.000194 | 0.000526 |
| 5960  | AKAP10    | 486.1497649 | 0.535525076 | 0.124951 | 4.285883 | 1.82E-05 | 5.98E-05 |
| 11685 | SCN4B     | 685.2631907 | 0.53548144  | 0.260562 | 2.055102 | 0.039869 | 0.066879 |
| 7143  | RSRC1     | 218.5044542 | 0.535449092 | 0.142175 | 3.766124 | 0.000166 | 0.000455 |
| 11175 | LOC641298 | 79.66272644 | 0.535411312 | 0.240029 | 2.23061  | 0.025707 | 0.04509  |
| 6503  | KIAA1671  | 2042.478501 | 0.534915707 | 0.132867 | 4.025942 | 5.67E-05 | 0.000171 |
| 4496  | KIAA0586  | 251.8045508 | 0.534637996 | 0.106066 | 5.040609 | 4.64E-07 | 2.02E-06 |
| 8460  | AGPAT6    | 1963.011298 | 0.53457136  | 0.165854 | 3.223136 | 0.001268 | 0.002938 |
| 5880  | C1orf9    | 1117.491766 | 0.534510923 | 0.123349 | 4.333328 | 1.47E-05 | 4.90E-05 |
| 9530  | LOC286367 | 45.84031752 | 0.534441935 | 0.190431 | 2.806481 | 0.005009 | 0.010301 |
| 13353 | LGALS2    | 882.7613897 | 0.534398803 | 0.349635 | 1.52845  | 0.126401 | 0.185545 |
| 4223  | TUBGCP4   | 249.4664096 | 0.534209559 | 0.102783 | 5.19746  | 2.02E-07 | 9.38E-07 |
| 5886  | KIF3B     | 2748.4348   | 0.533850232 | 0.123294 | 4.329912 | 1.49E-05 | 4.97E-05 |
| 7198  | ALG10     | 106.8411764 | 0.533763253 | 0.142441 | 3.74725  | 0.000179 | 0.000487 |
| 6810  | ZNF554    | 114.8354537 | 0.533653638 | 0.136988 | 3.895632 | 9.79E-05 | 0.000282 |
| 4052  | TOB2      | 2035.923004 | 0.533522453 | 0.100558 | 5.305611 | 1.12E-07 | 5.43E-07 |
| 4009  | RCOR3     | 877.9380937 | 0.53339524  | 0.099978 | 5.33515  | 9.55E-08 | 4.67E-07 |
| 3764  | XIAP      | 1519.584976 | 0.53310373  | 0.096938 | 5.499402 | 3.81E-08 | 1.98E-07 |
| 11376 | C10orf114 | 67.28599819 | 0.532923386 | 0.246743 | 2.159832 | 0.030786 | 0.053044 |
| 5063  | SPTLC1    | 1727.775507 | 0.532864625 | 0.112427 | 4.739662 | 2.14E-06 | 8.29E-06 |
| 10158 | SPTB      | 93.62088855 | 0.532764125 | 0.205177 | 2.596613 | 0.009415 | 0.018167 |
| 8619  | LOC147727 | 491.1825729 | 0.532651972 | 0.16813  | 3.168092 | 0.001534 | 0.00349  |
| 3684  | SNX27     | 1459.198301 | 0.532591588 | 0.096003 | 5.547648 | 2.90E-08 | 1.54E-07 |
| 5140  | SMARCA5   | 1787.183537 | 0.532426015 | 0.11308  | 4.708406 | 2.50E-06 | 9.52E-06 |
| 13769 | C8orf85   | 14.87353517 | 0.532412426 | 0.38126  | 1.396453 | 0.162578 | 0.231455 |
| 6876  | CNIH      | 1392.233029 | 0.531993254 | 0.137372 | 3.872645 | 0.000108 | 0.000307 |
| 14753 | CIB4      | 8.036766252 | 0.531921333 | 0.491425 | 1.082405 | 0.279072 | 0.370779 |
| 6662  | SLC31A1   | 1135.612958 | 0.531732548 | 0.134386 | 3.956768 | 7.60E-05 | 0.000224 |
| 5159  | AEBP2     | 933.2342081 | 0.531689665 | 0.113238 | 4.695347 | 2.66E-06 | 1.01E-05 |
| 8496  | FAM60A    | 1338.492194 | 0.531664379 | 0.16575  | 3.207632 | 0.001338 | 0.003088 |



|       |          |             |             |          |          |          |          |
|-------|----------|-------------|-------------|----------|----------|----------|----------|
| 9869  | CLEC1A   | 161.9146209 | 0.531606121 | 0.197048 | 2.697845 | 0.006979 | 0.013861 |
| 8560  | DCK      | 626.5442234 | 0.531426881 | 0.166782 | 3.186364 | 0.001441 | 0.003299 |
| 12028 | PHGDH    | 645.3470598 | 0.531247662 | 0.271902 | 1.953822 | 0.050722 | 0.082658 |
| 6233  | BBS10    | 534.5486339 | 0.530824445 | 0.12751  | 4.163015 | 3.14E-05 | 9.88E-05 |
| 4823  | PCM1     | 2341.464596 | 0.530818502 | 0.108805 | 4.878617 | 1.07E-06 | 4.34E-06 |
| 11388 | AS3MT    | 516.7147618 | 0.530511965 | 0.246117 | 2.155525 | 0.031121 | 0.053563 |
| 7100  | ARNTL    | 306.4111074 | 0.530487601 | 0.140234 | 3.782886 | 0.000155 | 0.000428 |
| 8818  | MRPL34   | 817.0940235 | 0.530392876 | 0.172077 | 3.082293 | 0.002054 | 0.004566 |
| 9717  | PPP1R12B | 1425.373802 | 0.530360936 | 0.193339 | 2.743168 | 0.006085 | 0.012274 |
| 6037  | FAM18B   | 602.2440058 | 0.530289854 | 0.124776 | 4.249922 | 2.14E-05 | 6.94E-05 |
| 2804  | MED17    | 573.4025175 | 0.529857262 | 0.08561  | 6.189214 | 6.05E-10 | 4.23E-09 |
| 5878  | CNN3     | 6796.65779  | 0.529673129 | 0.122213 | 4.334026 | 1.46E-05 | 4.88E-05 |
| 2223  | RIC8B    | 478.3479328 | 0.529379468 | 0.078661 | 6.729914 | 1.70E-11 | 1.50E-10 |
| 5795  | NUS1     | 1619.643421 | 0.529016119 | 0.120887 | 4.376109 | 1.21E-05 | 4.09E-05 |
| 3601  | NCBP1    | 704.689235  | 0.528724321 | 0.094334 | 5.604809 | 2.08E-08 | 1.13E-07 |
| 7425  | HLTF     | 953.7792822 | 0.528683748 | 0.144973 | 3.646765 | 0.000266 | 0.000701 |
| 6706  | TUSC1    | 508.2168204 | 0.528675287 | 0.134205 | 3.939304 | 8.17E-05 | 0.000239 |
| 3839  | DIS3     | 982.2264655 | 0.528593519 | 0.097146 | 5.44122  | 5.29E-08 | 2.70E-07 |
| 3728  | MECP2    | 1601.340218 | 0.52858766  | 0.095735 | 5.52135  | 3.36E-08 | 1.77E-07 |
| 14132 | GATA5    | 4.734609665 | 0.528539115 | 0.413229 | 1.279045 | 0.200881 | 0.278621 |
| 3964  | FAM120A  | 4639.593211 | 0.528430946 | 0.098479 | 5.365948 | 8.05E-08 | 3.98E-07 |
| 7271  | NUDT6    | 92.61014869 | 0.528352339 | 0.142262 | 3.713946 | 0.000204 | 0.00055  |
| 12595 | TOMM20L  | 1.505454594 | 0.528316945 | 0.29766  | 1.774903 | 0.075914 | 0.118141 |
| 5048  | MRRF     | 527.1909782 | 0.527909514 | 0.111171 | 4.748618 | 2.05E-06 | 7.95E-06 |
| 9738  | STOX2    | 69.10295602 | 0.52788078  | 0.192874 | 2.736919 | 0.006202 | 0.012483 |
| 4990  | ZNF567   | 122.627706  | 0.527875244 | 0.110473 | 4.778314 | 1.77E-06 | 6.94E-06 |
| 5374  | MBTD1    | 451.2766678 | 0.527796823 | 0.115234 | 4.580232 | 4.64E-06 | 1.69E-05 |
| 5973  | ZNF211   | 221.1652109 | 0.527704984 | 0.123273 | 4.280798 | 1.86E-05 | 6.11E-05 |
| 7846  | ZBTB41   | 771.2554585 | 0.527610198 | 0.15182  | 3.475236 | 0.00051  | 0.001275 |
| 14109 | GSTT1    | 1021.15911  | 0.52760018  | 0.410715 | 1.284591 | 0.198935 | 0.276372 |
| 3166  | FGFR10P2 | 644.9909975 | 0.527551897 | 0.08929  | 5.908318 | 3.46E-09 | 2.14E-08 |
| 13047 | TSSK1B   | 1.799727682 | 0.527540904 | 0.323387 | 1.631298 | 0.102828 | 0.154482 |
| 8253  | FER      | 76.07964043 | 0.527427485 | 0.159216 | 3.312658 | 0.000924 | 0.002195 |
| 6862  | GXYLT1   | 865.3788004 | 0.527418575 | 0.136038 | 3.877007 | 0.000106 | 0.000302 |
| 9210  | GLTP     | 1739.088641 | 0.527390369 | 0.179715 | 2.934587 | 0.00334  | 0.007108 |
| 4767  | ZNF238   | 697.6267687 | 0.527278744 | 0.107602 | 4.900276 | 9.57E-07 | 3.94E-06 |
| 4347  | BCL2L13  | 1768.635037 | 0.527278192 | 0.102717 | 5.133328 | 2.85E-07 | 1.28E-06 |
| 11513 | PCDH19   | 19.01864334 | 0.527123327 | 0.249592 | 2.111944 | 0.034691 | 0.059062 |
| 10391 | HGD      | 1317.627979 | 0.527103554 | 0.209991 | 2.51012  | 0.012069 | 0.022766 |
| 3226  | PAFAH1B1 | 3295.42199  | 0.527065521 | 0.089809 | 5.868713 | 4.39E-09 | 2.67E-08 |
| 4940  | UNC119B  | 1766.167649 | 0.526990424 | 0.109689 | 4.804415 | 1.55E-06 | 6.16E-06 |
| 4778  | FASTKD3  | 218.4976146 | 0.526939936 | 0.107631 | 4.895812 | 9.79E-07 | 4.02E-06 |
| 8501  | SLC16A14 | 137.3242315 | 0.526917583 | 0.164358 | 3.20592  | 0.001346 | 0.003104 |
| 11809 | TMEFF1   | 120.9257392 | 0.526779042 | 0.261001 | 2.018306 | 0.043559 | 0.072302 |
| 11692 | PLCB1    | 1202.359896 | 0.526650332 | 0.256504 | 2.053189 | 0.040054 | 0.067149 |
| 11965 | LYNX1    | 314.3484838 | 0.526494995 | 0.26725  | 1.970045 | 0.048833 | 0.079998 |
| 5449  | ARV1     | 409.4392076 | 0.526482292 | 0.115907 | 4.542266 | 5.57E-06 | 2.00E-05 |

|       |           |             |             |          |          |          |          |
|-------|-----------|-------------|-------------|----------|----------|----------|----------|
| 15003 | C3orf49   | 0.344282801 | 0.526417737 | 0.522974 | 1.006586 | 0.314134 | 0.410407 |
| 15674 | TAS2R50   | 0.285160242 | 0.5264175   | 0.646328 | 0.814475 | 0.415373 | 0.519442 |
| 16193 | PIRT      | 0.235388199 | 0.526417126 | 0.803088 | 0.655491 | 0.512152 | 0.61994  |
| 16297 | C1orf180  | 0.317490726 | 0.52641712  | 0.837864 | 0.628285 | 0.529817 | 0.637231 |
| 16902 | OR2T3     | 0.137836319 | 0.526415958 | 1.133326 | 0.464488 | 0.642298 | 0.744864 |
| 17149 | TMEM211   | 0.12254552  | 0.526415132 | 1.321121 | 0.398461 | 0.69029  | 0.78899  |
| 17420 | HIST1H1A  | 0.178522331 | 0.52641416  | 1.561065 | 0.337215 | 0.735955 | 0.828097 |
| 17512 | PSG10     | 0.265668461 | 0.526413844 | 1.683023 | 0.312779 | 0.754449 | 0.844447 |
| 17922 | SEMG1     | 0.158855504 | 0.526409003 | 2.348179 | 0.224178 | 0.822619 | 0.899685 |
| 18042 | FAM74A4   | 0.161509895 | 0.526406396 | 2.662853 | 0.197685 | 0.843291 | 0.916041 |
| 18078 | CNGA2     | 0.123727048 | 0.526405148 | 2.753446 | 0.19118  | 0.848384 | 0.919857 |
| 18116 | OR51G2    | 0.079652997 | 0.5264031   | 2.91407  | 0.180642 | 0.856649 | 0.92687  |
| 8870  | ZSCAN18   | 1076.529817 | 0.526338321 | 0.171824 | 3.063244 | 0.00219  | 0.004838 |
| 9401  | UBXN10    | 246.5456739 | 0.526259484 | 0.184095 | 2.858625 | 0.004255 | 0.008871 |
| 13091 | SLC24A5   | 17.40434969 | 0.526133601 | 0.326018 | 1.61382  | 0.106566 | 0.159549 |
| 11192 | NHSL2     | 60.05954226 | 0.526093431 | 0.236507 | 2.224435 | 0.026119 | 0.045744 |
| 4904  | TARSL2    | 404.22407   | 0.526037854 | 0.10903  | 4.824709 | 1.40E-06 | 5.60E-06 |
| 7547  | ZKSCAN1   | 767.9150094 | 0.525909814 | 0.146258 | 3.595757 | 0.000323 | 0.00084  |
| 5895  | TMEM9B    | 1454.158667 | 0.525638094 | 0.121576 | 4.323519 | 1.54E-05 | 5.11E-05 |
| 12141 | DYNLRB2   | 20.84418831 | 0.525562231 | 0.274398 | 1.91533  | 0.05545  | 0.089522 |
| 13999 | LOC284009 | 0.967514512 | 0.525520836 | 0.398598 | 1.318424 | 0.187362 | 0.262345 |
| 9854  | DDX60     | 1065.875873 | 0.525405925 | 0.194501 | 2.701295 | 0.006907 | 0.013737 |
| 9179  | C17orf91  | 265.4964171 | 0.525133305 | 0.178209 | 2.946728 | 0.003212 | 0.006858 |
| 4480  | GABPB2    | 87.50088586 | 0.525075047 | 0.10392  | 5.05267  | 4.36E-07 | 1.91E-06 |
| 4998  | TIMM17A   | 1026.326906 | 0.524747374 | 0.109898 | 4.774844 | 1.80E-06 | 7.05E-06 |
| 12877 | QPRT      | 1305.484582 | 0.524268764 | 0.311606 | 1.682473 | 0.092477 | 0.140774 |
| 4654  | ZFYVE21   | 805.4068141 | 0.524133591 | 0.105685 | 4.959384 | 7.07E-07 | 2.98E-06 |
| 14304 | DMRTC1B   | 6.883229204 | 0.524034166 | 0.426696 | 1.228119 | 0.219402 | 0.30065  |
| 4274  | DHX36     | 848.7852541 | 0.523988064 | 0.10136  | 5.169594 | 2.35E-07 | 1.08E-06 |
| 6337  | TMEM136   | 259.2556583 | 0.523833099 | 0.127452 | 4.110058 | 3.96E-05 | 0.000122 |
| 3766  | MFN2      | 2309.182688 | 0.523608738 | 0.095222 | 5.498837 | 3.82E-08 | 1.99E-07 |
| 11449 | LRRC48    | 126.7779549 | 0.523515163 | 0.24523  | 2.134796 | 0.032778 | 0.056116 |
| 12793 | GALNT3    | 110.7701667 | 0.522994523 | 0.306505 | 1.706317 | 0.087949 | 0.134752 |
| 8841  | PTPRJ     | 1838.545493 | 0.522935735 | 0.170102 | 3.074247 | 0.00211  | 0.004679 |
| 5499  | C2orf3    | 512.0295163 | 0.522921202 | 0.115641 | 4.521941 | 6.13E-06 | 2.18E-05 |
| 9022  | LPIN1     | 591.1645541 | 0.522890737 | 0.174048 | 3.004285 | 0.002662 | 0.005784 |
| 9649  | MBOAT2    | 249.3371441 | 0.522771926 | 0.189166 | 2.763568 | 0.005717 | 0.011615 |
| 12345 | LOC148696 | 5.576517111 | 0.522586127 | 0.282444 | 1.850229 | 0.06428  | 0.102069 |
| 4144  | PIGM      | 401.0971783 | 0.522549029 | 0.099446 | 5.254615 | 1.48E-07 | 7.02E-07 |
| 15624 | TBC1D29   | 0.385102128 | 0.522535272 | 0.630954 | 0.828168 | 0.407576 | 0.511322 |
| 8671  | PLXNA2    | 1283.619991 | 0.522380662 | 0.166218 | 3.14275  | 0.001674 | 0.003783 |
| 4757  | PHAX      | 524.5388172 | 0.522311068 | 0.106465 | 4.905948 | 9.30E-07 | 3.83E-06 |
| 3196  | DCAF6     | 1780.076372 | 0.522185364 | 0.088731 | 5.885049 | 3.98E-09 | 2.44E-08 |
| 6718  | COG8      | 504.6280941 | 0.522158841 | 0.132752 | 3.933347 | 8.38E-05 | 0.000244 |
| 4176  | TATDN3    | 379.9785099 | 0.522095927 | 0.099824 | 5.23017  | 1.69E-07 | 7.95E-07 |
| 4640  | SHPK      | 383.5254542 | 0.522051155 | 0.105057 | 4.969215 | 6.72E-07 | 2.84E-06 |
| 5817  | LOC647979 | 9445.948422 | 0.521896281 | 0.119553 | 4.365381 | 1.27E-05 | 4.28E-05 |

|       |           |             |             |          |          |          |          |
|-------|-----------|-------------|-------------|----------|----------|----------|----------|
| 4086  | RALGAPB   | 1749.217688 | 0.521895914 | 0.098671 | 5.289228 | 1.23E-07 | 5.89E-07 |
| 14270 | LOC254559 | 148.3037483 | 0.521784739 | 0.42186  | 1.236868 | 0.216136 | 0.29688  |
| 8685  | SDHA      | 5896.624827 | 0.521728172 | 0.166321 | 3.136879 | 0.001708 | 0.003854 |
| 3265  | C17orf42  | 168.5701385 | 0.521478931 | 0.089313 | 5.838811 | 5.26E-09 | 3.16E-08 |
| 3498  | ZNF543    | 109.3415966 | 0.521312261 | 0.091831 | 5.676839 | 1.37E-08 | 7.69E-08 |
| 4331  | XPNPEP3   | 216.9910864 | 0.52091121  | 0.101322 | 5.141135 | 2.73E-07 | 1.24E-06 |
| 7104  | GSTCD     | 218.3503329 | 0.52084055  | 0.13772  | 3.781891 | 0.000156 | 0.000429 |
| 12556 | KLRF1     | 26.43940976 | 0.52061004  | 0.29126  | 1.787441 | 0.073866 | 0.115312 |
| 12597 | KCNK10    | 8.404786881 | 0.520299107 | 0.293231 | 1.774365 | 0.076003 | 0.118261 |
| 11803 | KAAG1     | 9.066509695 | 0.520090633 | 0.257432 | 2.020302 | 0.043352 | 0.071994 |
| 3716  | LOC339290 | 604.9141971 | 0.520030855 | 0.09407  | 5.528115 | 3.24E-08 | 1.71E-07 |
| 5939  | ELP4      | 289.2359613 | 0.520003138 | 0.120963 | 4.298876 | 1.72E-05 | 5.67E-05 |
| 5359  | CLCN6     | 537.3307809 | 0.519885904 | 0.113335 | 4.587149 | 4.49E-06 | 1.64E-05 |
| 4476  | CWC22     | 662.2794975 | 0.519683415 | 0.102811 | 5.054757 | 4.31E-07 | 1.89E-06 |
| 5641  | TMEM41B   | 874.7449623 | 0.519552016 | 0.116703 | 4.451899 | 8.51E-06 | 2.96E-05 |
| 12849 | C14orf73  | 166.9498046 | 0.519178001 | 0.30706  | 1.690805 | 0.090874 | 0.138606 |
| 15097 | VSNL1     | 7.520026257 | 0.5190299   | 0.531217 | 0.977059 | 0.32854  | 0.426556 |
| 11318 | ZNF662    | 80.73599975 | 0.51899694  | 0.238745 | 2.173857 | 0.029716 | 0.051463 |
| 7854  | RB1       | 2181.787513 | 0.518493877 | 0.149426 | 3.469908 | 0.000521 | 0.001299 |
| 8584  | INTU      | 113.5166029 | 0.51822929  | 0.163031 | 3.17872  | 0.001479 | 0.003378 |
| 7731  | REEP3     | 623.4063821 | 0.517985678 | 0.146819 | 3.52805  | 0.000419 | 0.001061 |
| 9014  | KIAA0895  | 311.3852977 | 0.51793166  | 0.172212 | 3.007522 | 0.002634 | 0.005727 |
| 14071 | CNTD2     | 3.832091657 | 0.51690968  | 0.398796 | 1.296177 | 0.194914 | 0.271517 |
| 3007  | NFX1      | 1017.208405 | 0.516878094 | 0.085732 | 6.029006 | 1.65E-09 | 1.08E-08 |
| 3033  | MTERFD2   | 340.852264  | 0.516877244 | 0.086016 | 6.009096 | 1.87E-09 | 1.21E-08 |
| 5908  | MAD2L1BI  | 398.988903  | 0.516799056 | 0.119667 | 4.318638 | 1.57E-05 | 5.21E-05 |
| 5592  | PET112L   | 564.5355401 | 0.51677766  | 0.115461 | 4.475786 | 7.61E-06 | 2.67E-05 |
| 10566 | FILIP1    | 272.008067  | 0.516754809 | 0.211121 | 2.447666 | 0.014378 | 0.026674 |
| 7228  | C6orf203  | 247.7252863 | 0.516742927 | 0.138338 | 3.735378 | 0.000187 | 0.000508 |
| 12268 | FGF1      | 145.1548302 | 0.516567937 | 0.275063 | 1.878001 | 0.060381 | 0.096465 |
| 9209  | SGK1      | 3555.455037 | 0.516381598 | 0.17593  | 2.93516  | 0.003334 | 0.007096 |
| 6880  | ROCK1     | 1494.167769 | 0.516152317 | 0.133313 | 3.871719 | 0.000108 | 0.000308 |
| 9393  | KLHL21    | 1174.683672 | 0.515819151 | 0.180257 | 2.86158  | 0.004215 | 0.008796 |
| 1764  | ASB7      | 443.7004317 | 0.515651636 | 0.071347 | 7.227406 | 4.92E-13 | 5.47E-12 |
| 5701  | MRPL1     | 411.4106642 | 0.515627943 | 0.116654 | 4.420154 | 9.86E-06 | 3.39E-05 |
| 5303  | 43896     | 2534.220413 | 0.51540719  | 0.111563 | 4.619896 | 3.84E-06 | 1.42E-05 |
| 1645  | RUNDC1    | 503.9509471 | 0.51512916  | 0.069917 | 7.367718 | 1.74E-13 | 2.07E-12 |
| 11056 | KANK3     | 273.417304  | 0.514930805 | 0.226632 | 2.272104 | 0.02308  | 0.040919 |
| 15196 | ZMAT4     | 47.87822083 | 0.514822851 | 0.542457 | 0.949058 | 0.342591 | 0.441901 |
| 11115 | POU3F3    | 353.3677221 | 0.514797756 | 0.229107 | 2.246976 | 0.024642 | 0.043455 |
| 10529 | RAB11FIP1 | 1634.32589  | 0.51463334  | 0.209177 | 2.460282 | 0.013883 | 0.025844 |
| 2635  | RBM16     | 1038.04703  | 0.514523616 | 0.081152 | 6.340223 | 2.29E-10 | 1.71E-09 |
| 9918  | DCPS      | 414.4249689 | 0.514129678 | 0.191763 | 2.681069 | 0.007339 | 0.014504 |
| 7244  | ZFAT      | 388.8926069 | 0.514062837 | 0.13788  | 3.728342 | 0.000193 | 0.000522 |
| 8966  | STRADB    | 782.3624031 | 0.513833235 | 0.169907 | 3.024199 | 0.002493 | 0.00545  |
| 3505  | DDX10     | 543.9983383 | 0.513707623 | 0.090622 | 5.668659 | 1.44E-08 | 8.05E-08 |
| 4566  | USP16     | 878.4285643 | 0.513646835 | 0.102696 | 5.001604 | 5.69E-07 | 2.44E-06 |

|       |           |             |             |          |          |          |          |
|-------|-----------|-------------|-------------|----------|----------|----------|----------|
| 5726  | FXN       | 184.0253163 | 0.513628022 | 0.116513 | 4.408319 | 1.04E-05 | 3.57E-05 |
| 13207 | KHK       | 3581.235722 | 0.513403062 | 0.325465 | 1.577445 | 0.114693 | 0.170217 |
| 7293  | GLCE      | 796.595772  | 0.513366685 | 0.138698 | 3.701316 | 0.000214 | 0.000576 |
| 15083 | CRNA002C  | 0.747511785 | 0.513222503 | 0.52305  | 0.981211 | 0.326489 | 0.424286 |
| 7755  | TOR1AIP2  | 436.1531674 | 0.513001897 | 0.14588  | 3.5166   | 0.000437 | 0.001105 |
| 10852 | LPL       | 766.146373  | 0.512778304 | 0.219242 | 2.338865 | 0.019342 | 0.034937 |
| 12040 | C15orf52  | 336.0113971 | 0.512758171 | 0.263264 | 1.947692 | 0.051452 | 0.083763 |
| 4056  | MRPS18C   | 291.2239865 | 0.51274221  | 0.096708 | 5.301947 | 1.15E-07 | 5.54E-07 |
| 9264  | BRWD3     | 231.1758473 | 0.512446964 | 0.175993 | 2.911752 | 0.003594 | 0.007604 |
| 10288 | BNIP3     | 5498.896766 | 0.512438861 | 0.200952 | 2.550053 | 0.010771 | 0.020519 |
| 10227 | SPDYE6    | 27.19435961 | 0.512428335 | 0.199179 | 2.572705 | 0.010091 | 0.01934  |
| 6235  | TROVE2    | 1213.154998 | 0.512276228 | 0.123096 | 4.161584 | 3.16E-05 | 9.94E-05 |
| 5559  | QRSL1     | 474.8132476 | 0.512020295 | 0.113966 | 4.492727 | 7.03E-06 | 2.48E-05 |
| 10772 | DDI2      | 76.47888539 | 0.511749896 | 0.215545 | 2.374209 | 0.017587 | 0.031998 |
| 6000  | MAT2A     | 5045.198128 | 0.511745249 | 0.11992  | 4.267401 | 1.98E-05 | 6.46E-05 |
| 6261  | ASF1A     | 352.5271964 | 0.511745167 | 0.123289 | 4.150782 | 3.31E-05 | 0.000104 |
| 13730 | FAM66A    | 1.679887173 | 0.511562156 | 0.363558 | 1.407101 | 0.159397 | 0.22756  |
| 5184  | NDUFAF1   | 360.1559452 | 0.511560114 | 0.109231 | 4.683297 | 2.82E-06 | 1.07E-05 |
| 5998  | USP19     | 963.0696075 | 0.511383801 | 0.119812 | 4.268207 | 1.97E-05 | 6.44E-05 |
| 11493 | SYPL2     | 202.7861247 | 0.511274049 | 0.24088  | 2.122526 | 0.033794 | 0.057634 |
| 4108  | MON2      | 1265.084931 | 0.511021094 | 0.096855 | 5.276146 | 1.32E-07 | 6.29E-07 |
| 5060  | DCAF11    | 1464.817678 | 0.510850181 | 0.107726 | 4.742104 | 2.12E-06 | 8.19E-06 |
| 11140 | CN5H6.4   | 10.12737858 | 0.510830396 | 0.228066 | 2.239834 | 0.025102 | 0.044163 |
| 5928  | CYB5D2    | 564.7030986 | 0.510542213 | 0.118535 | 4.307112 | 1.65E-05 | 5.47E-05 |
| 8952  | ZNF439    | 134.7549087 | 0.510540786 | 0.168434 | 3.031112 | 0.002437 | 0.005335 |
| 4117  | PAPOLA    | 3578.348575 | 0.510453512 | 0.096824 | 5.271981 | 1.35E-07 | 6.43E-07 |
| 11265 | DBNDD1    | 402.0288727 | 0.510409767 | 0.232741 | 2.193037 | 0.028305 | 0.049246 |
| 5131  | MCPH1     | 388.9441238 | 0.510387949 | 0.108276 | 4.713778 | 2.43E-06 | 9.29E-06 |
| 5446  | UCHL5     | 415.4205368 | 0.51024286  | 0.112284 | 4.54423  | 5.51E-06 | 1.98E-05 |
| 6324  | GPD2      | 887.5279544 | 0.510175164 | 0.123971 | 4.115282 | 3.87E-05 | 0.00012  |
| 2397  | ZNF45     | 265.8436904 | 0.509820559 | 0.077708 | 6.560742 | 5.35E-11 | 4.38E-10 |
| 12240 | BICC1     | 790.0995535 | 0.509645825 | 0.270365 | 1.885027 | 0.059426 | 0.095158 |
| 12074 | ZNF354C   | 48.72231483 | 0.509588375 | 0.263245 | 1.935796 | 0.052893 | 0.085866 |
| 8260  | C9orf7    | 566.7896126 | 0.509541878 | 0.154005 | 3.308598 | 0.000938 | 0.002225 |
| 6438  | CLINT1    | 2679.849076 | 0.509540057 | 0.125678 | 4.054327 | 5.03E-05 | 0.000153 |
| 3678  | THUMPD1   | 1391.210825 | 0.509506264 | 0.091765 | 5.552264 | 2.82E-08 | 1.50E-07 |
| 3800  | ZNF507    | 544.7273439 | 0.509416772 | 0.093053 | 5.474489 | 4.39E-08 | 2.26E-07 |
| 3232  | RAB11A    | 3147.451974 | 0.50937126  | 0.086866 | 5.863852 | 4.52E-09 | 2.74E-08 |
| 7338  | ZNF430    | 104.3888946 | 0.509188277 | 0.138175 | 3.685099 | 0.000229 | 0.000611 |
| 4484  | WDR48     | 811.1377718 | 0.508992094 | 0.100818 | 5.048626 | 4.45E-07 | 1.95E-06 |
| 9510  | EPAS1     | 15045.81587 | 0.508625338 | 0.180606 | 2.816216 | 0.004859 | 0.010015 |
| 5413  | MKL2      | 1121.628547 | 0.508424889 | 0.111502 | 4.559768 | 5.12E-06 | 1.85E-05 |
| 10891 | OC1001297 | 10.59505327 | 0.508415039 | 0.218845 | 2.323175 | 0.02017  | 0.0363   |
| 4201  | LYRM2     | 792.2049184 | 0.50824876  | 0.097589 | 5.208037 | 1.91E-07 | 8.90E-07 |
| 6252  | ZFYVE16   | 1202.887776 | 0.508161683 | 0.122339 | 4.15371  | 3.27E-05 | 0.000103 |
| 7137  | NEDD1     | 526.4885329 | 0.508105187 | 0.1348   | 3.769333 | 0.000164 | 0.00045  |
| 5670  | METTL10   | 280.4163457 | 0.507956696 | 0.114493 | 4.436592 | 9.14E-06 | 3.16E-05 |

|       |           |             |             |          |          |          |          |
|-------|-----------|-------------|-------------|----------|----------|----------|----------|
| 12091 | CNTNAP2   | 8.349758966 | 0.507783226 | 0.262904 | 1.93144  | 0.053429 | 0.086614 |
| 8622  | IGSF3     | 1012.659378 | 0.50761467  | 0.160308 | 3.166497 | 0.001543 | 0.003508 |
| 4973  | EP300     | 2298.334696 | 0.507576862 | 0.106013 | 4.787864 | 1.69E-06 | 6.64E-06 |
| 5290  | PIBF1     | 353.7482842 | 0.507377668 | 0.109653 | 4.627128 | 3.71E-06 | 1.37E-05 |
| 8132  | SLC25A23  | 2578.038546 | 0.507282456 | 0.151001 | 3.359453 | 0.000781 | 0.001882 |
| 4112  | ATP5F1    | 3086.993608 | 0.507194448 | 0.096165 | 5.274231 | 1.33E-07 | 6.35E-07 |
| 6597  | MCM9      | 57.14426452 | 0.507031498 | 0.127253 | 3.984447 | 6.76E-05 | 0.000201 |
| 4576  | RNF111    | 784.9160424 | 0.507024595 | 0.101453 | 4.997622 | 5.80E-07 | 2.49E-06 |
| 6596  | NAB1      | 1510.641734 | 0.50675939  | 0.127173 | 3.984809 | 6.75E-05 | 0.000201 |
| 15141 | TMEM74    | 3.167797921 | 0.506450394 | 0.526444 | 0.962021 | 0.336039 | 0.434995 |
| 7874  | PIK3CA    | 528.7149028 | 0.506368323 | 0.146259 | 3.462138 | 0.000536 | 0.001334 |
| 3673  | MATR3     | 6482.59169  | 0.506315223 | 0.091156 | 5.554406 | 2.79E-08 | 1.49E-07 |
| 15740 | FOXN1     | 0.656393253 | 0.506253528 | 0.638963 | 0.792305 | 0.428183 | 0.533216 |
| 7337  | FAM174A   | 561.8134498 | 0.506216749 | 0.137333 | 3.686046 | 0.000228 | 0.000608 |
| 9937  | RAPGEF6   | 377.2305692 | 0.506176265 | 0.189262 | 2.674469 | 0.007485 | 0.014764 |
| 5299  | RETSAT    | 2013.810927 | 0.506155761 | 0.109501 | 4.622383 | 3.79E-06 | 1.40E-05 |
| 9841  | MORF4     | 3.304307889 | 0.505770052 | 0.186886 | 2.706297 | 0.006804 | 0.013552 |
| 8379  | ILVBL     | 1739.017219 | 0.50570803  | 0.155206 | 3.258308 | 0.001121 | 0.002622 |
| 11575 | SLC9A7    | 63.9756469  | 0.505611343 | 0.241912 | 2.090065 | 0.036612 | 0.061998 |
| 6620  | RNF14     | 1876.313337 | 0.505528469 | 0.12715  | 3.975842 | 7.01E-05 | 0.000208 |
| 14338 | MYH14     | 844.7380378 | 0.505436921 | 0.415207 | 1.217313 | 0.223485 | 0.305519 |
| 14869 | WNT8B     | 1.018954334 | 0.505242528 | 0.483005 | 1.04604  | 0.295542 | 0.389598 |
| 6212  | PLEKHM3   | 424.1344965 | 0.50522247  | 0.121097 | 4.172031 | 3.02E-05 | 9.53E-05 |
| 1848  | EIF4ENIF1 | 661.089672  | 0.505201284 | 0.070767 | 7.138986 | 9.40E-13 | 9.97E-12 |
| 5727  | VAMP7     | 1156.353094 | 0.50513697  | 0.114592 | 4.408151 | 1.04E-05 | 3.57E-05 |
| 4466  | WIPF2     | 1296.628999 | 0.505022695 | 0.099835 | 5.058594 | 4.22E-07 | 1.85E-06 |
| 11537 | RASGRP1   | 485.4513914 | 0.504901838 | 0.239996 | 2.103793 | 0.035397 | 0.060138 |
| 10932 | AFMID     | 670.1127606 | 0.504845765 | 0.218639 | 2.309034 | 0.020942 | 0.037548 |
| 4934  | VAPA      | 2994.420226 | 0.504796447 | 0.105019 | 4.80673  | 1.53E-06 | 6.09E-06 |
| 6385  | ZNF184    | 225.6867921 | 0.504745174 | 0.123587 | 4.084144 | 4.42E-05 | 0.000136 |
| 6066  | HERC2     | 1318.80029  | 0.504738346 | 0.11912  | 4.237234 | 2.26E-05 | 7.31E-05 |
| 11199 | HS3ST1    | 262.0983851 | 0.504518463 | 0.227106 | 2.221515 | 0.026316 | 0.04606  |
| 7908  | RNF138    | 492.7864948 | 0.504464014 | 0.146439 | 3.444869 | 0.000571 | 0.001416 |
| 12910 | GGT1      | 2979.196263 | 0.504360537 | 0.301897 | 1.670639 | 0.094793 | 0.143917 |
| 8407  | RGPD6     | 672.0625309 | 0.504328876 | 0.155326 | 3.246901 | 0.001167 | 0.00272  |
| 4146  | RNF115    | 477.5201821 | 0.504133012 | 0.095974 | 5.252835 | 1.50E-07 | 7.08E-07 |
| 8459  | KLHL26    | 204.8295395 | 0.503876681 | 0.156329 | 3.223176 | 0.001268 | 0.002938 |
| 10101 | PHF7      | 58.26666593 | 0.503506452 | 0.19245  | 2.616304 | 0.008889 | 0.017249 |
| 5767  | VPRBP     | 652.2147456 | 0.503166715 | 0.114656 | 4.388493 | 1.14E-05 | 3.88E-05 |
| 14729 | LRRC7     | 37.85836175 | 0.503124678 | 0.461663 | 1.08981  | 0.275797 | 0.367024 |
| 7138  | PIGA      | 359.1971033 | 0.503061731 | 0.133484 | 3.76871  | 0.000164 | 0.000451 |
| 6514  | IFT80     | 729.6420761 | 0.503054369 | 0.125067 | 4.022268 | 5.76E-05 | 0.000173 |
| 5891  | PPIP5K2   | 1081.402175 | 0.502959315 | 0.116281 | 4.325385 | 1.52E-05 | 5.07E-05 |
| 6627  | NUDT21    | 2033.275985 | 0.502926077 | 0.12657  | 3.973496 | 7.08E-05 | 0.000209 |
| 5402  | SPIN3     | 193.9194243 | 0.502897341 | 0.110175 | 4.564544 | 5.01E-06 | 1.82E-05 |
| 4983  | DCAF4     | 224.0394079 | 0.502776645 | 0.105139 | 4.782021 | 1.74E-06 | 6.82E-06 |
| 11258 | SLC5A3    | 2880.670784 | 0.502755219 | 0.228785 | 2.197496 | 0.027985 | 0.048724 |

|       |           |             |             |          |          |          |          |
|-------|-----------|-------------|-------------|----------|----------|----------|----------|
| 3347  | ZNF322A   | 698.9459165 | 0.50248132  | 0.086883 | 5.783414 | 7.32E-09 | 4.29E-08 |
| 7328  | LDOC1L    | 987.4344972 | 0.502447441 | 0.136202 | 3.688988 | 0.000225 | 0.000602 |
| 6824  | KLHL2     | 459.9852219 | 0.502161711 | 0.129086 | 3.890124 | 0.0001   | 0.000288 |
| 9107  | RRAGC     | 413.8393299 | 0.502147544 | 0.168789 | 2.974999 | 0.00293  | 0.006305 |
| 4799  | CHURC1    | 1301.263171 | 0.50157146  | 0.102619 | 4.887716 | 1.02E-06 | 4.17E-06 |
| 10336 | NDUFA4    | 3184.022653 | 0.501491495 | 0.197896 | 2.534112 | 0.011273 | 0.021378 |
| 6311  | SELT      | 2612.300241 | 0.500879309 | 0.121571 | 4.120072 | 3.79E-05 | 0.000118 |
| 5257  | ZNF627    | 396.1361281 | 0.500518172 | 0.107704 | 4.647159 | 3.37E-06 | 1.25E-05 |
| 7645  | MOSPD2    | 323.8763954 | 0.500479226 | 0.140483 | 3.56257  | 0.000367 | 0.000942 |
| 5755  | MRPS30    | 449.6641418 | 0.500285884 | 0.113882 | 4.393035 | 1.12E-05 | 3.81E-05 |
| 8365  | OAT       | 1361.762323 | 0.500141236 | 0.153147 | 3.265755 | 0.001092 | 0.002558 |
| 6419  | TYW3      | 553.6031404 | 0.499890479 | 0.122894 | 4.06765  | 4.75E-05 | 0.000145 |
| 13532 | CCDC144C  | 2.076314066 | 0.499621682 | 0.338492 | 1.476023 | 0.139938 | 0.202699 |
| 9512  | MAF       | 3996.941116 | 0.499396461 | 0.177383 | 2.815363 | 0.004872 | 0.01004  |
| 3560  | WAC       | 2845.916297 | 0.499361727 | 0.088731 | 5.627791 | 1.83E-08 | 1.01E-07 |
| 9129  | TMEM65    | 655.4713282 | 0.499358815 | 0.16835  | 2.966192 | 0.003015 | 0.006474 |
| 5554  | ZNF461    | 116.6363445 | 0.499031863 | 0.110942 | 4.498129 | 6.86E-06 | 2.42E-05 |
| 6388  | ZKSCAN3   | 60.31982679 | 0.499006417 | 0.122294 | 4.08037  | 4.50E-05 | 0.000138 |
| 9591  | UAP1L1    | 563.1224724 | 0.498937849 | 0.179284 | 2.782939 | 0.005387 | 0.011009 |
| 8701  | FAM92A1   | 160.2621184 | 0.498874722 | 0.159393 | 3.129836 | 0.001749 | 0.00394  |
| 13428 | CYP3A5    | 729.4184884 | 0.498831591 | 0.331168 | 1.50628  | 0.131995 | 0.192675 |
| 2485  | PACRGL    | 166.1665173 | 0.498771091 | 0.076916 | 6.484653 | 8.89E-11 | 7.01E-10 |
| 13280 | GNAO1     | 79.12988403 | 0.498637845 | 0.321495 | 1.550999 | 0.120902 | 0.178449 |
| 8716  | ELP3      | 873.4033123 | 0.498435691 | 0.159499 | 3.125015 | 0.001778 | 0.003998 |
| 15048 | SLITRK5   | 73.82151431 | 0.498334227 | 0.502821 | 0.991076 | 0.321648 | 0.418968 |
| 9359  | FZD4      | 3838.241925 | 0.498314628 | 0.17321  | 2.876933 | 0.004016 | 0.00841  |
| 5115  | THAP1     | 228.9671889 | 0.498272184 | 0.105548 | 4.720796 | 2.35E-06 | 9.00E-06 |
| 5997  | THUMPD3   | 697.0633171 | 0.497969814 | 0.11665  | 4.268938 | 1.96E-05 | 6.42E-05 |
| 15648 | NTN3      | 1.104038679 | 0.497933398 | 0.604795 | 0.823309 | 0.410332 | 0.51399  |
| 13010 | LOC127841 | 2.564190258 | 0.497867101 | 0.303437 | 1.64076  | 0.100847 | 0.151937 |
| 12678 | TRPM6     | 20.72100771 | 0.49785073  | 0.285199 | 1.745624 | 0.080876 | 0.12504  |
| 3670  | TCHP      | 360.6209366 | 0.497846179 | 0.089622 | 5.55497  | 2.78E-08 | 1.48E-07 |
| 3278  | DIS3L     | 684.6331972 | 0.497749736 | 0.085359 | 5.831265 | 5.50E-09 | 3.29E-08 |
| 10678 | EXOSC7    | 465.5716264 | 0.497736326 | 0.207175 | 2.402494 | 0.016284 | 0.029891 |
| 7952  | ZNF100    | 192.8152249 | 0.497350436 | 0.145125 | 3.427047 | 0.00061  | 0.001504 |
| 5958  | RIOK3     | 1981.545319 | 0.497339385 | 0.116011 | 4.287005 | 1.81E-05 | 5.96E-05 |
| 5232  | C8orf40   | 511.0166856 | 0.497281777 | 0.106682 | 4.661326 | 3.14E-06 | 1.18E-05 |
| 6339  | ABCA11P   | 66.78680284 | 0.497276806 | 0.121021 | 4.109007 | 3.97E-05 | 0.000123 |
| 3974  | RCOR1     | 733.7637707 | 0.497239187 | 0.092841 | 5.355818 | 8.52E-08 | 4.20E-07 |
| 6988  | LRRC8B    | 354.4342035 | 0.497237342 | 0.129813 | 3.830415 | 0.000128 | 0.000359 |
| 9134  | MXI1      | 2137.45533  | 0.497082384 | 0.167655 | 2.96492  | 0.003028 | 0.006497 |
| 8000  | DDX28     | 302.8495447 | 0.497009593 | 0.145762 | 3.409731 | 0.00065  | 0.001593 |
| 9982  | LRRC37A4  | 189.5855012 | 0.496961286 | 0.186947 | 2.658304 | 0.007854 | 0.015421 |
| 5971  | SOS1      | 1481.799246 | 0.496894516 | 0.116058 | 4.281415 | 1.86E-05 | 6.10E-05 |
| 3585  | CDC23     | 852.4949412 | 0.496751151 | 0.088491 | 5.613551 | 1.98E-08 | 1.08E-07 |
| 11710 | RAB39B    | 45.58588272 | 0.49671951  | 0.242292 | 2.050084 | 0.040356 | 0.067551 |
| 6376  | PGBD1     | 111.1799816 | 0.496625151 | 0.121441 | 4.089432 | 4.32E-05 | 0.000133 |

|       |           |             |             |          |          |          |          |
|-------|-----------|-------------|-------------|----------|----------|----------|----------|
| 6104  | PPP1R2P3  | 57.87903918 | 0.496501254 | 0.117638 | 4.220582 | 2.44E-05 | 7.82E-05 |
| 4915  | ALDH7A1   | 1869.869022 | 0.496476774 | 0.103017 | 4.81939  | 1.44E-06 | 5.74E-06 |
| 5772  | ZNF644    | 856.4092658 | 0.496428544 | 0.113223 | 4.384539 | 1.16E-05 | 3.95E-05 |
| 6592  | ZNF141    | 93.06198352 | 0.49623923  | 0.12451  | 3.985544 | 6.73E-05 | 0.0002   |
| 6027  | PDCD10    | 598.6763123 | 0.496208914 | 0.116657 | 4.253574 | 2.10E-05 | 6.84E-05 |
| 4731  | LOC729082 | 543.913259  | 0.495988343 | 0.100851 | 4.918042 | 8.74E-07 | 3.62E-06 |
| 10867 | PARM1     | 1452.896049 | 0.495984089 | 0.212509 | 2.333947 | 0.019598 | 0.03535  |
| 5736  | RAP1GDS1  | 839.7154189 | 0.495917308 | 0.112624 | 4.403288 | 1.07E-05 | 3.64E-05 |
| 6854  | DLG1      | 1554.07951  | 0.495726754 | 0.127801 | 3.878894 | 0.000105 | 0.0003   |
| 14378 | AGXT      | 23.709147   | 0.495703032 | 0.411906 | 1.203436 | 0.228807 | 0.311925 |
| 6444  | PPM1D     | 418.1575443 | 0.495693896 | 0.122324 | 4.05231  | 5.07E-05 | 0.000154 |
| 5029  | GDAP2     | 325.12478   | 0.495683036 | 0.104128 | 4.760339 | 1.93E-06 | 7.53E-06 |
| 16305 | NKX2-2    | 2.016626943 | 0.495504581 | 0.791293 | 0.626196 | 0.531186 | 0.638551 |
| 5654  | TMEM126F  | 755.9292218 | 0.49537447  | 0.111431 | 4.445557 | 8.77E-06 | 3.04E-05 |
| 10962 | HCG4P6    | 8.684834597 | 0.495338975 | 0.215389 | 2.299746 | 0.021463 | 0.038377 |
| 15131 | TUBB4Q    | 0.749695199 | 0.495334133 | 0.51362  | 0.964397 | 0.334847 | 0.433767 |
| 5391  | PARG      | 377.8636441 | 0.495304758 | 0.108341 | 4.571701 | 4.84E-06 | 1.76E-05 |
| 6725  | AAGAB     | 784.2837269 | 0.495248131 | 0.125956 | 3.931912 | 8.43E-05 | 0.000246 |
| 14748 | TDGF1     | 3.579636014 | 0.49523453  | 0.456725 | 1.084318 | 0.278224 | 0.369777 |
| 8358  | DYRK3     | 210.36454   | 0.494971138 | 0.151482 | 3.267521 | 0.001085 | 0.002544 |
| 1695  | GOSR1     | 1202.463855 | 0.494920479 | 0.067792 | 7.300521 | 2.87E-13 | 3.31E-12 |
| 13162 | PNPLA3    | 19.68857552 | 0.494865496 | 0.311011 | 1.591149 | 0.111576 | 0.16616  |
| 7985  | TTC14     | 631.5515247 | 0.494838134 | 0.144832 | 3.416643 | 0.000634 | 0.001556 |
| 7924  | ZBTB37    | 25.32895098 | 0.494761141 | 0.143885 | 3.438598 | 0.000585 | 0.001446 |
| 12585 | LRCH2     | 110.6648609 | 0.494684524 | 0.278335 | 1.777296 | 0.075519 | 0.117621 |
| 6106  | FLCN      | 713.3491653 | 0.494621011 | 0.117233 | 4.219131 | 2.45E-05 | 7.87E-05 |
| 9312  | CBWD6     | 106.722129  | 0.494507542 | 0.170761 | 2.89591  | 0.003781 | 0.007958 |
| 4109  | CTNND1    | 7715.943804 | 0.494492991 | 0.093733 | 5.275569 | 1.32E-07 | 6.31E-07 |
| 7225  | NICN1     | 290.7030468 | 0.494461715 | 0.132348 | 3.736083 | 0.000187 | 0.000507 |
| 8218  | PIK3C2B   | 636.8269044 | 0.494460554 | 0.148705 | 3.325102 | 0.000884 | 0.002108 |
| 3453  | PDE8A     | 1225.293524 | 0.494455797 | 0.086662 | 5.70556  | 1.16E-08 | 6.58E-08 |
| 7866  | GAN       | 32.85310763 | 0.494381173 | 0.142667 | 3.465284 | 0.00053  | 0.00132  |
| 6023  | DNAJC19   | 563.5556384 | 0.494296408 | 0.116171 | 4.25492  | 2.09E-05 | 6.81E-05 |
| 5623  | THEM4     | 365.1169133 | 0.494285496 | 0.110811 | 4.460598 | 8.17E-06 | 2.85E-05 |
| 6727  | ARL8B     | 1960.003011 | 0.494211044 | 0.12571  | 3.931351 | 8.45E-05 | 0.000246 |
| 12570 | PLA2R1    | 241.1844305 | 0.49411551  | 0.277354 | 1.781537 | 0.074825 | 0.116678 |
| 8524  | C21orf49  | 9.31605926  | 0.493857386 | 0.154533 | 3.1958   | 0.001394 | 0.003206 |
| 9660  | TWSG1     | 1456.741115 | 0.493814831 | 0.178811 | 2.761662 | 0.005751 | 0.01167  |
| 4837  | C20orf194 | 833.3897934 | 0.493611098 | 0.101352 | 4.870272 | 1.11E-06 | 4.52E-06 |
| 3385  | RNF185    | 1465.751217 | 0.493447188 | 0.085714 | 5.756902 | 8.57E-09 | 4.96E-08 |
| 6300  | TMEM50B   | 971.7882901 | 0.493316693 | 0.119522 | 4.127403 | 3.67E-05 | 0.000114 |
| 5096  | TFB2M     | 306.6598509 | 0.493277491 | 0.10431  | 4.728953 | 2.26E-06 | 8.68E-06 |
| 4472  | RRAGB     | 271.5272014 | 0.49305175  | 0.097512 | 5.056337 | 4.27E-07 | 1.87E-06 |
| 3582  | IARS2     | 2578.94546  | 0.49304469  | 0.087791 | 5.616127 | 1.95E-08 | 1.07E-07 |
| 10048 | LOC595101 | 87.13914281 | 0.492987655 | 0.187062 | 2.635428 | 0.008403 | 0.016392 |
| 6540  | MOBKL3    | 897.4871916 | 0.492948853 | 0.122982 | 4.008309 | 6.12E-05 | 0.000183 |
| 7349  | ROD1      | 2507.659824 | 0.492729629 | 0.133845 | 3.681355 | 0.000232 | 0.000619 |

|       |           |             |             |          |          |          |          |
|-------|-----------|-------------|-------------|----------|----------|----------|----------|
| 3146  | SPATA5L1  | 181.0516613 | 0.492602691 | 0.083138 | 5.925129 | 3.12E-09 | 1.94E-08 |
| 9425  | CCRN4L    | 206.1489057 | 0.492581687 | 0.172929 | 2.848461 | 0.004393 | 0.009136 |
| 7075  | TMEM30A   | 5500.307631 | 0.492515446 | 0.129829 | 3.79358  | 0.000148 | 0.000411 |
| 12037 | OVGP1     | 78.36208531 | 0.492180994 | 0.252517 | 1.949098 | 0.051284 | 0.08351  |
| 4601  | TECPR2    | 594.9299953 | 0.492063375 | 0.09864  | 4.988465 | 6.09E-07 | 2.59E-06 |
| 665   | PLRG1     | 748.7434825 | 0.491984286 | 0.053951 | 9.119031 | 7.58E-20 | 2.23E-18 |
| 11332 | MTMR11    | 895.8308933 | 0.491953381 | 0.226685 | 2.170206 | 0.029991 | 0.051876 |
| 6638  | ETAA1     | 424.2768835 | 0.491849221 | 0.12395  | 3.968121 | 7.24E-05 | 0.000214 |
| 9379  | CNDP2     | 18492.09419 | 0.491675727 | 0.171506 | 2.866819 | 0.004146 | 0.008665 |
| 4281  | IPO8      | 1600.042191 | 0.491446225 | 0.095126 | 5.166242 | 2.39E-07 | 1.09E-06 |
| 4698  | PPM1B     | 967.654763  | 0.49109331  | 0.099582 | 4.931523 | 8.16E-07 | 3.40E-06 |
| 6148  | SHOC2     | 1355.081095 | 0.490981377 | 0.116813 | 4.20314  | 2.63E-05 | 8.39E-05 |
| 6538  | INO80D    | 689.5824889 | 0.490951794 | 0.122454 | 4.009275 | 6.09E-05 | 0.000183 |
| 6440  | SMEK2     | 2379.724429 | 0.490920264 | 0.121106 | 4.05364  | 5.04E-05 | 0.000153 |
| 8758  | BAG4      | 173.8867246 | 0.490917728 | 0.158223 | 3.102703 | 0.001918 | 0.004292 |
| 9201  | SYNE1     | 2285.69876  | 0.490894391 | 0.167112 | 2.937509 | 0.003309 | 0.007048 |
| 4782  | TTC5      | 215.8400739 | 0.490826645 | 0.100291 | 4.894027 | 9.88E-07 | 4.05E-06 |
| 9983  | BOC       | 317.006628  | 0.490601652 | 0.184561 | 2.658211 | 0.007856 | 0.015424 |
| 3434  | SP2       | 490.0559104 | 0.49042806  | 0.085717 | 5.721466 | 1.06E-08 | 6.03E-08 |
| 5379  | ZNF235    | 80.00964908 | 0.490385063 | 0.107134 | 4.5773   | 4.71E-06 | 1.72E-05 |
| 5881  | ZFP1      | 272.8681926 | 0.490298388 | 0.113162 | 4.332725 | 1.47E-05 | 4.91E-05 |
| 9304  | C6orf136  | 268.8204889 | 0.490226948 | 0.16907  | 2.899543 | 0.003737 | 0.007873 |
| 4960  | KRIT1     | 829.5179732 | 0.490038684 | 0.102266 | 4.791808 | 1.65E-06 | 6.53E-06 |
| 7310  | WDR44     | 428.6926424 | 0.490026646 | 0.132535 | 3.697351 | 0.000218 | 0.000584 |
| 10748 | KIAA1543  | 345.712904  | 0.489962966 | 0.205757 | 2.381274 | 0.017253 | 0.031464 |
| 14329 | COL4A6    | 10.14311929 | 0.489611676 | 0.400582 | 1.22225  | 0.221613 | 0.30315  |
| 6982  | TMF1      | 1139.752486 | 0.489513922 | 0.127724 | 3.832587 | 0.000127 | 0.000356 |
| 14551 | LOC284276 | 18.86068041 | 0.488905226 | 0.424976 | 1.15043  | 0.249967 | 0.336737 |
| 6508  | KLHL7     | 661.5426398 | 0.488852244 | 0.12148  | 4.024129 | 5.72E-05 | 0.000172 |
| 8598  | MDN1      | 656.1378576 | 0.488754809 | 0.153919 | 3.175401 | 0.001496 | 0.003411 |
| 7219  | PTBP2     | 402.0459844 | 0.48849796  | 0.130687 | 3.737933 | 0.000186 | 0.000504 |
| 8331  | TDP2      | 1315.71908  | 0.48839266  | 0.14889  | 3.280219 | 0.001037 | 0.00244  |
| 5852  | VPS26A    | 1363.878784 | 0.48807998  | 0.112331 | 4.345012 | 1.39E-05 | 4.66E-05 |
| 7130  | ACAP2     | 1299.394451 | 0.487990202 | 0.129307 | 3.773889 | 0.000161 | 0.000442 |
| 7566  | NFXL1     | 203.3426961 | 0.487733473 | 0.135857 | 3.590057 | 0.000331 | 0.000856 |
| 8112  | C9orf93   | 35.47062279 | 0.487633539 | 0.144923 | 3.364768 | 0.000766 | 0.001851 |
| 11124 | SNPH      | 145.8295713 | 0.487320061 | 0.217103 | 2.244646 | 0.024791 | 0.04369  |
| 4136  | EZH1      | 940.1210645 | 0.487036723 | 0.092586 | 5.260388 | 1.44E-07 | 6.81E-07 |
| 7563  | RSPH3     | 177.4781687 | 0.486800816 | 0.135532 | 3.591781 | 0.000328 | 0.000851 |
| 5423  | USP25     | 1046.920583 | 0.486787298 | 0.106864 | 4.5552   | 5.23E-06 | 1.89E-05 |
| 12988 | PCA3      | 3.134970956 | 0.486750358 | 0.295208 | 1.648836 | 0.099181 | 0.149699 |
| 8897  | ZNF678    | 42.60815236 | 0.48674659  | 0.159417 | 3.053292 | 0.002263 | 0.004987 |
| 4648  | PCF11     | 1148.653177 | 0.48674033  | 0.098093 | 4.962042 | 6.98E-07 | 2.94E-06 |
| 7977  | ZNF572    | 52.1160603  | 0.48665827  | 0.142333 | 3.419144 | 0.000628 | 0.001544 |
| 6200  | ING3      | 344.4150366 | 0.486415351 | 0.116476 | 4.176111 | 2.97E-05 | 9.37E-05 |
| 3783  | ARIH1     | 1489.830212 | 0.486297897 | 0.088682 | 5.483601 | 4.17E-08 | 2.16E-07 |
| 8296  | PUS7L     | 192.8083148 | 0.486131749 | 0.147523 | 3.295291 | 0.000983 | 0.002323 |



|       |           |             |             |          |          |          |          |
|-------|-----------|-------------|-------------|----------|----------|----------|----------|
| 7027  | CS        | 4201.776774 | 0.486097589 | 0.127547 | 3.81113  | 0.000138 | 0.000386 |
| 4507  | CHMP1B    | 1862.749176 | 0.485915967 | 0.0966   | 5.030194 | 4.90E-07 | 2.13E-06 |
| 5690  | MYST3     | 1307.088877 | 0.485854187 | 0.109766 | 4.426285 | 9.59E-06 | 3.30E-05 |
| 13324 | DC1001303 | 3.025224855 | 0.48566748  | 0.316353 | 1.535206 | 0.124733 | 0.183496 |
| 13385 | ODZ1      | 473.109827  | 0.485651939 | 0.320447 | 1.515547 | 0.129634 | 0.189836 |
| 14124 | ADAM21P1  | 0.905309756 | 0.485589804 | 0.379299 | 1.280228 | 0.200465 | 0.278201 |
| 5740  | RAB12     | 1006.138055 | 0.485425632 | 0.11027  | 4.402151 | 1.07E-05 | 3.66E-05 |
| 15629 | FLJ41941  | 1.074257717 | 0.485364708 | 0.587046 | 0.826791 | 0.408355 | 0.512136 |
| 4352  | ZNF585A   | 165.2238023 | 0.485227573 | 0.094591 | 5.129743 | 2.90E-07 | 1.31E-06 |
| 10318 | CA13      | 135.8746865 | 0.485177793 | 0.190947 | 2.540903 | 0.011057 | 0.021    |
| 13212 | C2orf72   | 216.945793  | 0.48512475  | 0.307832 | 1.57594  | 0.11504  | 0.17067  |
| 4604  | GOLGB1    | 3723.843507 | 0.484907783 | 0.097227 | 4.987371 | 6.12E-07 | 2.61E-06 |
| 9725  | CAMK2N1   | 2953.605049 | 0.484706317 | 0.176886 | 2.740216 | 0.00614  | 0.012375 |
| 3742  | GAPVD1    | 1066.454737 | 0.484532955 | 0.08791  | 5.511705 | 3.55E-08 | 1.86E-07 |
| 6786  | USP9X     | 4327.506113 | 0.484283154 | 0.124043 | 3.904148 | 9.46E-05 | 0.000273 |
| 11545 | AMT       | 329.3550221 | 0.484270705 | 0.230638 | 2.099703 | 0.035755 | 0.060704 |
| 5978  | NEK4      | 338.207127  | 0.484049756 | 0.113133 | 4.278598 | 1.88E-05 | 6.17E-05 |
| 4571  | ZNF326    | 360.9919537 | 0.483844507 | 0.096787 | 4.999091 | 5.76E-07 | 2.47E-06 |
| 3982  | COX15     | 1301.069064 | 0.483755375 | 0.090369 | 5.353138 | 8.64E-08 | 4.26E-07 |
| 5362  | ZNF586    | 152.0837087 | 0.483734983 | 0.105492 | 4.585507 | 4.53E-06 | 1.66E-05 |
| 11879 | PAPLN     | 1526.8221   | 0.483558105 | 0.242167 | 1.996795 | 0.045847 | 0.075651 |
| 10853 | SEC16B    | 520.8568896 | 0.483489367 | 0.20673  | 2.338746 | 0.019349 | 0.034944 |
| 3086  | SMEK1     | 1413.978247 | 0.483443831 | 0.080955 | 5.971752 | 2.35E-09 | 1.49E-08 |
| 3972  | ZBED5     | 929.8283985 | 0.483362994 | 0.09019  | 5.35936  | 8.35E-08 | 4.12E-07 |
| 11106 | DNALI1    | 551.9388051 | 0.483348808 | 0.214736 | 2.250896 | 0.024392 | 0.04305  |
| 6046  | YTHDC2    | 986.5873492 | 0.483227936 | 0.11383  | 4.245176 | 2.18E-05 | 7.08E-05 |
| 3686  | DDX17     | 8826.284987 | 0.48317112  | 0.087128 | 5.545524 | 2.93E-08 | 1.56E-07 |
| 6183  | PGGT1B    | 443.6446404 | 0.482910368 | 0.115434 | 4.183417 | 2.87E-05 | 9.10E-05 |
| 5478  | WDR89     | 290.1835874 | 0.482876528 | 0.106564 | 4.53132  | 5.86E-06 | 2.10E-05 |
| 5087  | INPP5A    | 499.9406022 | 0.482622431 | 0.102031 | 4.730145 | 2.24E-06 | 8.64E-06 |
| 4913  | MRPL46    | 414.5660095 | 0.482600467 | 0.100124 | 4.820043 | 1.44E-06 | 5.73E-06 |
| 7123  | AM120AO   | 1354.127698 | 0.48254698  | 0.127756 | 3.777087 | 0.000159 | 0.000437 |
| 6384  | PEX2      | 917.5498055 | 0.48251624  | 0.118135 | 4.084449 | 4.42E-05 | 0.000136 |
| 8768  | SNX16     | 273.596519  | 0.482188446 | 0.155726 | 3.096383 | 0.001959 | 0.004379 |
| 5305  | C17orf75  | 263.8478559 | 0.481711388 | 0.104315 | 4.617857 | 3.88E-06 | 1.43E-05 |
| 12689 | C10orf67  | 17.05250518 | 0.481711284 | 0.27681  | 1.740221 | 0.08182  | 0.12639  |
| 4356  | C2orf43   | 397.8260812 | 0.481687577 | 0.093936 | 5.127823 | 2.93E-07 | 1.32E-06 |
| 9792  | TMOD2     | 694.9353223 | 0.481492715 | 0.177089 | 2.718935 | 0.006549 | 0.01311  |
| 6660  | GPR89A    | 799.6504539 | 0.481435891 | 0.121662 | 3.957172 | 7.58E-05 | 0.000223 |
| 5070  | COX10     | 288.2835576 | 0.481409989 | 0.101623 | 4.737205 | 2.17E-06 | 8.38E-06 |
| 11719 | LOC158376 | 123.6860365 | 0.48134683  | 0.235171 | 2.046793 | 0.040678 | 0.068038 |
| 15235 | SOX10     | 1.514818662 | 0.481243831 | 0.513355 | 0.937449 | 0.348528 | 0.448408 |
| 12481 | MBNL3     | 89.25099642 | 0.481211999 | 0.266067 | 1.808612 | 0.070511 | 0.110736 |
| 8411  | KAZ       | 620.5488122 | 0.481058992 | 0.148227 | 3.24541  | 0.001173 | 0.002733 |
| 12118 | F2RL1     | 1152.404379 | 0.480781312 | 0.250028 | 1.922907 | 0.054492 | 0.088141 |
| 2902  | TOX4      | 1460.402451 | 0.480591031 | 0.078641 | 6.111216 | 9.89E-10 | 6.68E-09 |
| 13386 | DNM1      | 653.9611605 | 0.480554788 | 0.317131 | 1.515321 | 0.129691 | 0.189906 |

|       |           |             |             |          |          |          |          |
|-------|-----------|-------------|-------------|----------|----------|----------|----------|
| 7319  | TSC22D1   | 8154.817635 | 0.480507327 | 0.130141 | 3.69221  | 0.000222 | 0.000595 |
| 11125 | HOXD3     | 78.67770572 | 0.480453616 | 0.214088 | 2.244187 | 0.02482  | 0.043731 |
| 6225  | ZCCHC10   | 347.6214022 | 0.480261115 | 0.115271 | 4.166382 | 3.09E-05 | 9.74E-05 |
| 5673  | C4orf3    | 4180.491175 | 0.480236552 | 0.108266 | 4.435714 | 9.18E-06 | 3.17E-05 |
| 13661 | RFX8      | 14.27246222 | 0.480231687 | 0.334589 | 1.43529  | 0.151204 | 0.21695  |
| 7485  | TBC1D12   | 401.7343892 | 0.480162847 | 0.132599 | 3.621166 | 0.000293 | 0.000768 |
| 10475 | EYS       | 12.60794825 | 0.479713019 | 0.193251 | 2.482327 | 0.013053 | 0.024425 |
| 5162  | FAM120B   | 615.0996487 | 0.479552784 | 0.102181 | 4.69315  | 2.69E-06 | 1.02E-05 |
| 7824  | INPP4A    | 673.586053  | 0.479187102 | 0.137201 | 3.492588 | 0.000478 | 0.001198 |
| 10599 | RBM43     | 456.8050469 | 0.47917836  | 0.196678 | 2.436364 | 0.014836 | 0.027436 |
| 5798  | FAM190B   | 1301.361349 | 0.479152244 | 0.109534 | 4.374469 | 1.22E-05 | 4.12E-05 |
| 6816  | DOCK1     | 1625.899784 | 0.479064755 | 0.123062 | 3.892863 | 9.91E-05 | 0.000285 |
| 10478 | HDAC11    | 532.7820126 | 0.479021591 | 0.193055 | 2.481266 | 0.013092 | 0.02449  |
| 9289  | PLEKHA2   | 2565.143677 | 0.478802609 | 0.164899 | 2.903618 | 0.003689 | 0.007784 |
| 10204 | OXR1      | 1235.542431 | 0.478764111 | 0.185506 | 2.580857 | 0.009856 | 0.018932 |
| 7948  | CLDN12    | 1175.426033 | 0.478289643 | 0.139503 | 3.428522 | 0.000607 | 0.001497 |
| 7206  | ADIPOR2   | 2184.237947 | 0.478144152 | 0.12781  | 3.741064 | 0.000183 | 0.000498 |
| 12396 | RENBP     | 558.9687923 | 0.478143617 | 0.260263 | 1.837156 | 0.066187 | 0.104657 |
| 7295  | TMED10P1  | 49.13558521 | 0.478124131 | 0.12919  | 3.700935 | 0.000215 | 0.000577 |
| 7981  | SPCS3     | 4070.95083  | 0.478046401 | 0.139828 | 3.418809 | 0.000629 | 0.001545 |
| 5679  | PNN       | 1630.419359 | 0.477941526 | 0.107827 | 4.432489 | 9.32E-06 | 3.22E-05 |
| 13534 | UGT2B10   | 14.77608917 | 0.477925221 | 0.323907 | 1.475504 | 0.140077 | 0.202871 |
| 7650  | IRAK1BP1  | 38.68601091 | 0.47791472  | 0.134258 | 3.55967  | 0.000371 | 0.000951 |
| 3650  | SAP30L    | 1116.657676 | 0.477802964 | 0.085749 | 5.572094 | 2.52E-08 | 1.35E-07 |
| 5214  | ATP2C1    | 2965.452873 | 0.477799241 | 0.102253 | 4.672717 | 2.97E-06 | 1.12E-05 |
| 13627 | ITGA8     | 181.6667176 | 0.477681711 | 0.330133 | 1.446939 | 0.147914 | 0.212759 |
| 8569  | RNF169    | 597.8749819 | 0.477672443 | 0.15001  | 3.184278 | 0.001451 | 0.003319 |
| 4626  | RANBP9    | 793.8823104 | 0.477575234 | 0.09596  | 4.976809 | 6.46E-07 | 2.74E-06 |
| 7932  | TMX1      | 1465.214526 | 0.477456261 | 0.138982 | 3.435372 | 0.000592 | 0.001462 |
| 13882 | CHODL     | 12.73655311 | 0.47745189  | 0.352675 | 1.353803 | 0.175799 | 0.248224 |
| 7487  | C6orf120  | 1020.024681 | 0.477408881 | 0.131852 | 3.620786 | 0.000294 | 0.000769 |
| 7371  | VAMP2     | 1786.197665 | 0.477342705 | 0.130079 | 3.66965  | 0.000243 | 0.000646 |
| 13234 | FCER1A    | 56.77568352 | 0.477187692 | 0.304206 | 1.568633 | 0.116733 | 0.172895 |
| 6935  | SNRPN     | 2242.744127 | 0.47715508  | 0.12397  | 3.848959 | 0.000119 | 0.000335 |
| 13894 | NTSR1     | 10.70292447 | 0.477080778 | 0.353432 | 1.349853 | 0.177063 | 0.249792 |
| 7651  | SUOX      | 821.110642  | 0.477075814 | 0.134045 | 3.559066 | 0.000372 | 0.000953 |
| 7214  | ZNF836    | 138.0280764 | 0.477050804 | 0.127593 | 3.738858 | 0.000185 | 0.000502 |
| 9945  | ARGLU1    | 1524.855369 | 0.476961703 | 0.178479 | 2.672373 | 0.007532 | 0.014843 |
| 6048  | DOPEY1    | 614.4730776 | 0.476822245 | 0.112385 | 4.242755 | 2.21E-05 | 7.16E-05 |
| 5970  | RRN3      | 1275.737856 | 0.476740186 | 0.111328 | 4.28232  | 1.85E-05 | 6.07E-05 |
| 5503  | CARKD     | 1008.456316 | 0.476634901 | 0.10548  | 4.518715 | 6.22E-06 | 2.22E-05 |
| 3125  | DHX9      | 3233.973119 | 0.476525547 | 0.080143 | 5.945938 | 2.75E-09 | 1.72E-08 |
| 6542  | ANO10     | 734.6305145 | 0.476335139 | 0.118863 | 4.007432 | 6.14E-05 | 0.000184 |
| 8858  | NFKBIA    | 3744.165466 | 0.476331639 | 0.155287 | 3.067436 | 0.002159 | 0.004778 |
| 5811  | C14orf142 | 235.8725922 | 0.476328612 | 0.108999 | 4.370009 | 1.24E-05 | 4.19E-05 |
| 7506  | SIRT1     | 660.5186974 | 0.476177326 | 0.131711 | 3.615323 | 0.0003   | 0.000783 |
| 11616 | SPATA17   | 24.14126839 | 0.476153389 | 0.229417 | 2.075493 | 0.037941 | 0.064022 |

|       |           |             |             |          |          |          |          |
|-------|-----------|-------------|-------------|----------|----------|----------|----------|
| 6488  | ALKBH8    | 208.1706879 | 0.476126783 | 0.118053 | 4.033157 | 5.50E-05 | 0.000166 |
| 12557 | NPY1R     | 431.8207457 | 0.475999641 | 0.266374 | 1.786957 | 0.073944 | 0.115424 |
| 7612  | C12orf29  | 479.502477  | 0.475759732 | 0.133033 | 3.576267 | 0.000349 | 0.000897 |
| 11157 | ITPR1     | 1649.697759 | 0.475748564 | 0.212754 | 2.236144 | 0.025342 | 0.044522 |
| 13839 | C9orf122  | 32.84269691 | 0.475638316 | 0.346751 | 1.371701 | 0.170156 | 0.241003 |
| 15523 | PCSK9     | 3.312513526 | 0.475513249 | 0.557835 | 0.852427 | 0.393977 | 0.497478 |
| 8294  | VHL       | 392.2150796 | 0.475362424 | 0.144203 | 3.296489 | 0.000979 | 0.002314 |
| 7594  | CAPZA2    | 4268.316119 | 0.475323976 | 0.132716 | 3.581513 | 0.000342 | 0.000882 |
| 5650  | KLF11     | 1106.287211 | 0.475317934 | 0.106857 | 4.448148 | 8.66E-06 | 3.00E-05 |
| 9812  | PRDM11    | 23.8573808  | 0.475285798 | 0.175149 | 2.713609 | 0.006655 | 0.013295 |
| 10267 | RPS6KA5   | 102.4881351 | 0.475279773 | 0.185756 | 2.558628 | 0.010509 | 0.020062 |
| 5498  | UBXN4     | 3602.888932 | 0.475252758 | 0.10507  | 4.523193 | 6.09E-06 | 2.17E-05 |
| 13751 | MPV17L    | 192.0968135 | 0.475007448 | 0.338719 | 1.402365 | 0.160806 | 0.229217 |
| 6579  | MAEA      | 1258.841507 | 0.474741831 | 0.118938 | 3.991494 | 6.57E-05 | 0.000196 |
| 6697  | FAM54B    | 1221.546951 | 0.474697029 | 0.120438 | 3.941428 | 8.10E-05 | 0.000237 |
| 5979  | SETX      | 2088.72417  | 0.474675268 | 0.110959 | 4.277951 | 1.89E-05 | 6.18E-05 |
| 16152 | AMAC1     | 0.561836181 | 0.474530816 | 0.71288  | 0.665653 | 0.505633 | 0.613578 |
| 15208 | RD3       | 0.916207514 | 0.474376329 | 0.501852 | 0.945252 | 0.34453  | 0.444052 |
| 8745  | SPATA24   | 62.54309935 | 0.474250427 | 0.152466 | 3.110526 | 0.001868 | 0.004186 |
| 6969  | LAMP2     | 7577.394082 | 0.474076606 | 0.12345  | 3.840223 | 0.000123 | 0.000346 |
| 7149  | BAZ2B     | 705.2371583 | 0.473584188 | 0.125794 | 3.764763 | 0.000167 | 0.000457 |
| 8208  | RMI1      | 228.0308435 | 0.473171979 | 0.142137 | 3.328987 | 0.000872 | 0.002081 |
| 7844  | MAPRE2    | 2543.514828 | 0.473016544 | 0.136035 | 3.477158 | 0.000507 | 0.001266 |
| 10990 | RAET1E    | 10.09449591 | 0.472917641 | 0.206487 | 2.290306 | 0.022004 | 0.039244 |
| 14468 | SH2D7     | 0.71405989  | 0.472620855 | 0.4012   | 1.178018 | 0.23879  | 0.323508 |
| 5137  | C16orf72  | 1219.648937 | 0.472402206 | 0.10029  | 4.710374 | 2.47E-06 | 9.43E-06 |
| 7076  | NEO1      | 1869.962542 | 0.471842865 | 0.124389 | 3.79329  | 0.000149 | 0.000412 |
| 10467 | SHANK3    | 1398.433266 | 0.471453613 | 0.189614 | 2.486381 | 0.012905 | 0.024166 |
| 6589  | C9orf95   | 536.9818108 | 0.471442771 | 0.11823  | 3.987494 | 6.68E-05 | 0.000199 |
| 8328  | LOC220930 | 148.3930029 | 0.471432003 | 0.143699 | 3.280691 | 0.001036 | 0.002437 |
| 11028 | GLB1L     | 1002.799116 | 0.47087433  | 0.206472 | 2.280576 | 0.022574 | 0.040122 |
| 5045  | ARFGAP3   | 1788.833807 | 0.470807407 | 0.099108 | 4.750429 | 2.03E-06 | 7.89E-06 |
| 7983  | TRDMT1    | 176.6108766 | 0.470787573 | 0.137744 | 3.417855 | 0.000631 | 0.00155  |
| 14425 | FAM150B   | 234.2898922 | 0.470785166 | 0.395358 | 1.190782 | 0.233739 | 0.31761  |
| 5564  | TNRC6B    | 858.0494379 | 0.470703447 | 0.104809 | 4.491072 | 7.09E-06 | 2.50E-05 |
| 9241  | SLC2A11   | 266.6542832 | 0.470651384 | 0.161093 | 2.921619 | 0.003482 | 0.007386 |
| 16565 | NKX6-1    | 0.508030532 | 0.470511921 | 0.84727  | 0.555327 | 0.578671 | 0.684729 |
| 4185  | BCDIN3D   | 143.3867113 | 0.470371761 | 0.090153 | 5.217486 | 1.81E-07 | 8.49E-07 |
| 6995  | NLK       | 655.9537341 | 0.470246673 | 0.122919 | 3.825664 | 0.00013  | 0.000365 |
| 7659  | WDR35     | 688.8172378 | 0.470165462 | 0.132281 | 3.554302 | 0.000379 | 0.00097  |
| 9759  | DYX1C1    | 74.55989206 | 0.469833085 | 0.172182 | 2.728705 | 0.006358 | 0.012771 |
| 7499  | MAP4K5    | 855.0208066 | 0.469696475 | 0.129832 | 3.617718 | 0.000297 | 0.000777 |
| 6296  | HIRA      | 710.44868   | 0.469534519 | 0.113716 | 4.129022 | 3.64E-05 | 0.000113 |
| 10884 | DC1001290 | 4064.838541 | 0.469490495 | 0.201692 | 2.327757 | 0.019925 | 0.035883 |
| 15789 | LINGO2    | 1.762694953 | 0.469410727 | 0.602131 | 0.779582 | 0.435637 | 0.540815 |
| 11865 | KBTBD11   | 2262.0827   | 0.469370814 | 0.234453 | 2.001982 | 0.045287 | 0.074814 |
| 12349 | CSRNP3    | 15.00442278 | 0.469280292 | 0.253736 | 1.84948  | 0.064389 | 0.102201 |

|       |           |             |             |          |          |          |          |
|-------|-----------|-------------|-------------|----------|----------|----------|----------|
| 8298  | ADAT1     | 254.5272504 | 0.469232189 | 0.142421 | 3.294682 | 0.000985 | 0.002327 |
| 5263  | MYST4     | 729.2509912 | 0.469113228 | 0.101009 | 4.644288 | 3.41E-06 | 1.27E-05 |
| 9352  | TUBB1     | 20.38147116 | 0.469091297 | 0.162941 | 2.878905 | 0.003991 | 0.008365 |
| 6039  | C14orf109 | 345.4634343 | 0.468874401 | 0.110328 | 4.249834 | 2.14E-05 | 6.94E-05 |
| 16116 | AKAP4     | 0.304447779 | 0.468709661 | 0.693261 | 0.676094 | 0.498981 | 0.606846 |
| 16213 | ST7OT2    | 0.228863618 | 0.46870955  | 0.719456 | 0.651477 | 0.514738 | 0.622302 |
| 17204 | BOLL      | 0.191924843 | 0.468708055 | 1.212622 | 0.386524 | 0.699108 | 0.796467 |
| 17343 | CDX2      | 0.213936514 | 0.468707703 | 1.316199 | 0.356107 | 0.72176  | 0.815731 |
| 17346 | LOR       | 0.167635695 | 0.468707576 | 1.322727 | 0.35435  | 0.723077 | 0.817078 |
| 17434 | PRB2      | 0.194963755 | 0.468707224 | 1.418027 | 0.330535 | 0.740996 | 0.8331   |
| 17566 | BANF2     | 0.128091275 | 0.468706333 | 1.566005 | 0.299301 | 0.764711 | 0.853233 |
| 17709 | DNAJC5G   | 0.089863485 | 0.46870507  | 1.766118 | 0.265387 | 0.790711 | 0.875193 |
| 17936 | MTNR1B    | 0.131342548 | 0.468703003 | 2.121955 | 0.220883 | 0.825184 | 0.901786 |
| 18119 | CFHR2     | 0.20921814  | 0.468700104 | 2.601571 | 0.18016  | 0.857027 | 0.927074 |
| 18205 | C14orf165 | 0.071772388 | 0.468695788 | 2.91407  | 0.160839 | 0.87222  | 0.939104 |
| 7633  | ZNF442    | 34.15754185 | 0.468665984 | 0.131398 | 3.566768 | 0.000361 | 0.000928 |
| 4946  | RPRD2     | 1521.025157 | 0.468624312 | 0.097581 | 4.802433 | 1.57E-06 | 6.21E-06 |
| 7147  | ATP11B    | 1528.406634 | 0.468543346 | 0.124441 | 3.765182 | 0.000166 | 0.000456 |
| 13728 | AACSL     | 22.98108423 | 0.46848227  | 0.332856 | 1.407462 | 0.15929  | 0.227437 |
| 7585  | APITD1    | 319.9742952 | 0.468442461 | 0.130696 | 3.584223 | 0.000338 | 0.000874 |
| 4494  | MED20     | 305.6035516 | 0.46824572  | 0.092867 | 5.042089 | 4.60E-07 | 2.01E-06 |
| 4660  | ANKFY1    | 1462.355385 | 0.468241285 | 0.094484 | 4.955778 | 7.20E-07 | 3.03E-06 |
| 12702 | IQCA1     | 137.8905702 | 0.468103833 | 0.270077 | 1.733225 | 0.083056 | 0.128167 |
| 14946 | PTPRT     | 6.299385661 | 0.468099169 | 0.457568 | 1.023014 | 0.306301 | 0.4017   |
| 9848  | GCLM      | 493.1319788 | 0.467933021 | 0.172981 | 2.705119 | 0.006828 | 0.01359  |
| 15323 | FMEM132C  | 4.187046536 | 0.467819141 | 0.511891 | 0.913903 | 0.360768 | 0.46149  |
| 9761  | SNED1     | 440.1257299 | 0.467562159 | 0.17143  | 2.727425 | 0.006383 | 0.012818 |
| 4647  | FUBP1     | 1263.714397 | 0.467517362 | 0.094202 | 4.962933 | 6.94E-07 | 2.93E-06 |
| 6306  | CEBPZ     | 1244.088433 | 0.46732386  | 0.113327 | 4.123689 | 3.73E-05 | 0.000116 |
| 10732 | CASC2     | 64.90181196 | 0.467176258 | 0.195715 | 2.387028 | 0.016985 | 0.031019 |
| 16397 | ITIH5L    | 0.726898453 | 0.466906447 | 0.775785 | 0.60185  | 0.547274 | 0.654212 |
| 7734  | USP6NL    | 395.5644858 | 0.466895452 | 0.132409 | 3.526154 | 0.000422 | 0.001069 |
| 8120  | IDE       | 498.0626178 | 0.466301637 | 0.138667 | 3.362738 | 0.000772 | 0.001863 |
| 13630 | GLIS1     | 224.1126022 | 0.466054027 | 0.322616 | 1.444611 | 0.148567 | 0.213651 |
| 4803  | TBC1D13   | 968.8787452 | 0.465615038 | 0.095304 | 4.885583 | 1.03E-06 | 4.21E-06 |
| 12568 | HIST2H2BA | 7.309282891 | 0.465470178 | 0.261123 | 1.78257  | 0.074656 | 0.116434 |
| 8707  | CNNM2     | 310.292902  | 0.465386254 | 0.148821 | 3.127155 | 0.001765 | 0.003973 |
| 7132  | LRCH1     | 921.8707417 | 0.465175261 | 0.123295 | 3.772858 | 0.000161 | 0.000444 |
| 6530  | LIAS      | 227.3200825 | 0.464995196 | 0.11588  | 4.012725 | 6.00E-05 | 0.00018  |
| 7618  | YPEL2     | 1382.573354 | 0.464921564 | 0.130067 | 3.574491 | 0.000351 | 0.000903 |
| 12095 | MAP2      | 631.2882933 | 0.464801202 | 0.24073  | 1.930796 | 0.053508 | 0.086715 |
| 5843  | ABCE1     | 1385.239026 | 0.464733146 | 0.10684  | 4.349786 | 1.36E-05 | 4.57E-05 |
| 14412 | ASFMR1    | 1.058513957 | 0.464692454 | 0.389107 | 1.194253 | 0.232379 | 0.316039 |
| 4019  | SDAD1     | 784.6172838 | 0.464562063 | 0.087183 | 5.328611 | 9.90E-08 | 4.83E-07 |
| 8826  | TMEM159   | 978.950155  | 0.464549221 | 0.150795 | 3.080675 | 0.002065 | 0.004587 |
| 9232  | PTPRK     | 2001.970135 | 0.464318301 | 0.158618 | 2.927269 | 0.00342  | 0.00726  |
| 4317  | KAT5      | 992.6326941 | 0.464309096 | 0.090211 | 5.146918 | 2.65E-07 | 1.20E-06 |

|       |           |             |             |          |          |          |          |
|-------|-----------|-------------|-------------|----------|----------|----------|----------|
| 12173 | LPCAT2    | 805.8351539 | 0.464287278 | 0.243749 | 1.904772 | 0.05681  | 0.091475 |
| 5778  | APPL2     | 943.7517689 | 0.464236863 | 0.105934 | 4.382302 | 1.17E-05 | 3.98E-05 |
| 5809  | ABI2      | 1452.141101 | 0.464024225 | 0.106175 | 4.37039  | 1.24E-05 | 4.18E-05 |
| 6461  | C16orf63  | 926.4363711 | 0.463727992 | 0.114665 | 4.04419  | 5.25E-05 | 0.000159 |
| 15455 | TAS2R43   | 0.447902932 | 0.463661819 | 0.530633 | 0.873791 | 0.382232 | 0.484781 |
| 6168  | RRP15     | 481.4853242 | 0.462905348 | 0.11043  | 4.191829 | 2.77E-05 | 8.79E-05 |
| 8989  | RBM7      | 610.7159487 | 0.462888774 | 0.153375 | 3.018011 | 0.002544 | 0.005548 |
| 10951 | FAM21A    | 457.3343831 | 0.462860374 | 0.200929 | 2.303601 | 0.021245 | 0.038026 |
| 7099  | HACL1     | 307.429039  | 0.462800805 | 0.122331 | 3.783191 | 0.000155 | 0.000428 |
| 13423 | SLC10A6   | 17.86141628 | 0.462593206 | 0.306938 | 1.507123 | 0.131779 | 0.192431 |
| 6144  | BPTF      | 1529.789773 | 0.462515481 | 0.110022 | 4.203836 | 2.62E-05 | 8.37E-05 |
| 11726 | LRRIQ3    | 12.37227794 | 0.462324524 | 0.22609  | 2.044866 | 0.040868 | 0.068314 |
| 8564  | NFIB      | 2698.43539  | 0.461979753 | 0.14504  | 3.185197 | 0.001447 | 0.003311 |
| 6744  | DSTN      | 6883.13504  | 0.461754668 | 0.117716 | 3.922622 | 8.76E-05 | 0.000255 |
| 7307  | TTC28     | 1237.246842 | 0.461750126 | 0.124867 | 3.697923 | 0.000217 | 0.000583 |
| 7426  | SPRED2    | 1006.399087 | 0.46163809  | 0.126596 | 3.64655  | 0.000266 | 0.000702 |
| 5003  | C12orf72  | 84.70318135 | 0.461107051 | 0.096608 | 4.772962 | 1.82E-06 | 7.11E-06 |
| 9700  | LOC641367 | 4.691743823 | 0.461094801 | 0.16788  | 2.746566 | 0.006022 | 0.012169 |
| 4481  | ZFR       | 2304.644686 | 0.461011063 | 0.091304 | 5.049186 | 4.44E-07 | 1.94E-06 |
| 9731  | SHANK2    | 668.6236394 | 0.461006947 | 0.168379 | 2.737913 | 0.006183 | 0.012454 |
| 5464  | VPS35     | 3062.37348  | 0.460977344 | 0.101624 | 4.536128 | 5.73E-06 | 2.06E-05 |
| 3554  | POLR2B    | 1716.719702 | 0.460827875 | 0.081814 | 5.632622 | 1.77E-08 | 9.79E-08 |
| 13220 | NME5      | 156.9980908 | 0.460761765 | 0.292815 | 1.573558 | 0.11559  | 0.171382 |
| 5635  | PDXDC1    | 2939.786241 | 0.460550963 | 0.103412 | 4.453569 | 8.45E-06 | 2.94E-05 |
| 13029 | GGTLC1    | 21.53128439 | 0.460369221 | 0.281606 | 1.634797 | 0.102092 | 0.153588 |
| 8327  | RECK      | 371.1973337 | 0.460358751 | 0.140315 | 3.280891 | 0.001035 | 0.002436 |
| 4326  | GMPR2     | 1368.266459 | 0.46020972  | 0.089477 | 5.143302 | 2.70E-07 | 1.22E-06 |
| 7247  | ZNF587    | 474.5833581 | 0.46017901  | 0.123468 | 3.727102 | 0.000194 | 0.000524 |
| 9225  | LRP2BP    | 81.04841832 | 0.460157484 | 0.157115 | 2.928795 | 0.003403 | 0.00723  |
| 5945  | ZSCAN16   | 72.25237177 | 0.460023508 | 0.107153 | 4.293133 | 1.76E-05 | 5.81E-05 |
| 15961 | ATP1A4    | 0.713307214 | 0.459927412 | 0.634763 | 0.724566 | 0.468718 | 0.575612 |
| 8574  | CHCHD7    | 475.7531513 | 0.459878963 | 0.144563 | 3.181166 | 0.001467 | 0.003353 |
| 6509  | SFMBT1    | 226.7330442 | 0.459835775 | 0.114283 | 4.023653 | 5.73E-05 | 0.000173 |
| 6087  | DNAJA1    | 2904.875916 | 0.459822285 | 0.108786 | 4.226835 | 2.37E-05 | 7.63E-05 |
| 10797 | PCBD1     | 1839.874546 | 0.459376861 | 0.194363 | 2.363494 | 0.018104 | 0.032865 |
| 9131  | STAG1     | 864.7437067 | 0.459278052 | 0.154863 | 2.9657   | 0.00302  | 0.006483 |
| 12364 | KCNN3     | 131.9733165 | 0.459177726 | 0.248639 | 1.846768 | 0.064781 | 0.102699 |
| 6543  | OMA1      | 303.7323379 | 0.458918028 | 0.11452  | 4.007318 | 6.14E-05 | 0.000184 |
| 8607  | PGBD4     | 38.39876865 | 0.458869671 | 0.144621 | 3.172917 | 0.001509 | 0.003436 |
| 6748  | SMG1      | 2412.822993 | 0.458869264 | 0.117064 | 3.919813 | 8.86E-05 | 0.000257 |
| 2137  | MFAP1     | 729.5542299 | 0.45884417  | 0.06731  | 6.816849 | 9.31E-12 | 8.54E-11 |
| 14747 | SLC47A2   | 42.73275304 | 0.45883487  | 0.423137 | 1.084365 | 0.278203 | 0.369777 |
| 3699  | TSG101    | 1479.758579 | 0.458784796 | 0.082873 | 5.535975 | 3.10E-08 | 1.64E-07 |
| 6286  | ZNF845    | 188.3735118 | 0.458706946 | 0.110871 | 4.137298 | 3.51E-05 | 0.00011  |
| 7386  | PDPR      | 1304.872527 | 0.458637295 | 0.12525  | 3.661789 | 0.00025  | 0.000665 |
| 8202  | ZNF214    | 65.37649698 | 0.458583575 | 0.137637 | 3.331845 | 0.000863 | 0.002062 |
| 4684  | RABEP1    | 1293.683292 | 0.458308759 | 0.092798 | 4.938777 | 7.86E-07 | 3.29E-06 |

|       |           |             |             |          |          |          |          |
|-------|-----------|-------------|-------------|----------|----------|----------|----------|
| 8485  | VCPIP1    | 879.9226021 | 0.458120101 | 0.142586 | 3.212932 | 0.001314 | 0.003035 |
| 5955  | SETD2     | 1240.356028 | 0.458060049 | 0.10683  | 4.287762 | 1.80E-05 | 5.94E-05 |
| 10545 | GLIS3     | 767.0727229 | 0.45793219  | 0.186571 | 2.454465 | 0.014109 | 0.026227 |
| 15333 | KCNJ13    | 27.81841159 | 0.457709283 | 0.502894 | 0.91015  | 0.362743 | 0.463684 |
| 9864  | MBOAT1    | 202.9961038 | 0.457564913 | 0.169535 | 2.698943 | 0.006956 | 0.013822 |
| 7732  | UBXN8     | 213.7049799 | 0.457482071 | 0.129721 | 3.526651 | 0.000421 | 0.001067 |
| 7215  | DCUN1D1   | 564.4771417 | 0.457361974 | 0.122335 | 3.738608 | 0.000185 | 0.000503 |
| 7081  | GRINL1A   | 1241.982387 | 0.457176578 | 0.120596 | 3.790992 | 0.00015  | 0.000415 |
| 14580 | SALL4     | 11.33195078 | 0.456897353 | 0.399953 | 1.142377 | 0.253297 | 0.340527 |
| 9154  | ATF2      | 584.9485067 | 0.456691778 | 0.154449 | 2.956912 | 0.003107 | 0.006654 |
| 5365  | CCDC93    | 851.7386668 | 0.456676923 | 0.099617 | 4.584338 | 4.55E-06 | 1.66E-05 |
| 6113  | ZDHHC9    | 1965.907755 | 0.456630634 | 0.108342 | 4.214719 | 2.50E-05 | 8.02E-05 |
| 8794  | SLC30A7   | 1372.156798 | 0.45656864  | 0.147878 | 3.08747  | 0.002019 | 0.004499 |
| 7504  | CSPP1     | 276.6499339 | 0.456436556 | 0.126226 | 3.616024 | 0.000299 | 0.000781 |
| 6807  | PTPN11    | 3140.956165 | 0.456277941 | 0.117094 | 3.896684 | 9.75E-05 | 0.000281 |
| 14862 | SNX31     | 2.646507694 | 0.45624923  | 0.434805 | 1.04932  | 0.294031 | 0.387788 |
| 6408  | CDYL      | 389.3655998 | 0.456218388 | 0.112016 | 4.072791 | 4.65E-05 | 0.000142 |
| 8988  | ZNF516    | 267.0386792 | 0.455985442 | 0.151059 | 3.018596 | 0.002539 | 0.005538 |
| 6072  | ZFYVE26   | 830.6331848 | 0.455771753 | 0.10763  | 4.234626 | 2.29E-05 | 7.39E-05 |
| 5723  | MCART1    | 181.2590026 | 0.455767878 | 0.103359 | 4.409549 | 1.04E-05 | 3.55E-05 |
| 6491  | CXorf56   | 163.6216367 | 0.455420379 | 0.112965 | 4.031526 | 5.54E-05 | 0.000167 |
| 6806  | KIAA1598  | 922.4765414 | 0.455185878 | 0.116804 | 3.897018 | 9.74E-05 | 0.00028  |
| 5606  | HNRPLL    | 530.6445478 | 0.455030737 | 0.101844 | 4.467913 | 7.90E-06 | 2.76E-05 |
| 7813  | PHC3      | 1727.537839 | 0.455021411 | 0.130119 | 3.496955 | 0.000471 | 0.001181 |
| 10999 | MERTK     | 615.0339829 | 0.455003241 | 0.198791 | 2.288849 | 0.022088 | 0.039359 |
| 3206  | BTRC      | 500.9496753 | 0.454991046 | 0.077367 | 5.880917 | 4.08E-09 | 2.49E-08 |
| 5240  | SDHB      | 1525.082463 | 0.45498138  | 0.097711 | 4.656391 | 3.22E-06 | 1.20E-05 |
| 6818  | NAA50     | 2226.465602 | 0.45489027  | 0.116876 | 3.892089 | 9.94E-05 | 0.000286 |
| 6873  | PPP1CB    | 7169.340993 | 0.454797952 | 0.11739  | 3.874233 | 0.000107 | 0.000305 |
| 3040  | SAPS3     | 1954.651414 | 0.454277461 | 0.075652 | 6.004825 | 1.92E-09 | 1.23E-08 |
| 5149  | DDX46     | 1140.697989 | 0.453807144 | 0.096496 | 4.702853 | 2.57E-06 | 9.77E-06 |
| 13270 | HIST1H2AF | 2.986046274 | 0.453806342 | 0.29166  | 1.555945 | 0.119721 | 0.176839 |
| 6630  | SEC23IP   | 981.7523145 | 0.453736135 | 0.114232 | 3.972057 | 7.13E-05 | 0.000211 |
| 8094  | SMC3      | 1148.324858 | 0.453660682 | 0.134481 | 3.37342  | 0.000742 | 0.001798 |
| 16347 | MUC15     | 3.737970324 | 0.453652159 | 0.737702 | 0.614953 | 0.538586 | 0.645795 |
| 14550 | DOC2A     | 434.2272637 | 0.453510736 | 0.394234 | 1.150361 | 0.249995 | 0.336737 |
| 5754  | FAM173B   | 225.0084421 | 0.453479227 | 0.103219 | 4.393388 | 1.12E-05 | 3.80E-05 |
| 10447 | STAG3L4   | 288.4158478 | 0.453320125 | 0.181681 | 2.495139 | 0.012591 | 0.023623 |
| 7139  | EEF1E1    | 357.0529402 | 0.453192818 | 0.120258 | 3.768503 | 0.000164 | 0.000451 |
| 9205  | WRB       | 909.1718355 | 0.453159604 | 0.15435  | 2.935924 | 0.003326 | 0.007081 |
| 5489  | FBXO22    | 497.4189316 | 0.453042665 | 0.100083 | 4.526689 | 5.99E-06 | 2.14E-05 |
| 14988 | GPC5      | 4.473908584 | 0.453037183 | 0.448572 | 1.009954 | 0.312517 | 0.408703 |
| 7837  | YIPF4     | 665.2144365 | 0.452944327 | 0.13015  | 3.48017  | 0.000501 | 0.001253 |
| 6299  | VBP1      | 888.0058028 | 0.452312076 | 0.109581 | 4.127665 | 3.66E-05 | 0.000114 |
| 5254  | PPP2R2D   | 610.0066849 | 0.452262877 | 0.097299 | 4.64819  | 3.35E-06 | 1.25E-05 |
| 11010 | SERP2     | 53.94410361 | 0.452227762 | 0.19774  | 2.286983 | 0.022197 | 0.039517 |
| 4725  | SLC25A20  | 401.8572733 | 0.45216705  | 0.091911 | 4.919593 | 8.67E-07 | 3.60E-06 |

|       |          |             |             |          |          |          |          |
|-------|----------|-------------|-------------|----------|----------|----------|----------|
| 10091 | COQ10A   | 169.7723983 | 0.451845619 | 0.172468 | 2.619886 | 0.008796 | 0.017085 |
| 7805  | ZNF529   | 368.6748116 | 0.451652841 | 0.129052 | 3.499771 | 0.000466 | 0.001169 |
| 14542 | HAVCR1   | 717.1888343 | 0.451479947 | 0.391561 | 1.153026 | 0.2489   | 0.335489 |
| 6401  | NANP     | 193.0798948 | 0.451443794 | 0.111076 | 4.075856 | 4.58E-05 | 0.00014  |
| 13663 | MLXIPL   | 452.0246146 | 0.451392626 | 0.314571 | 1.434945 | 0.151303 | 0.217059 |
| 12190 | GGH      | 480.4748739 | 0.451371531 | 0.237622 | 1.899534 | 0.057494 | 0.092448 |
| 7192  | CCDC82   | 678.2631271 | 0.451330935 | 0.120398 | 3.748669 | 0.000178 | 0.000485 |
| 8949  | ZFAND1   | 662.1334023 | 0.451297216 | 0.148762 | 3.03369  | 0.002416 | 0.005292 |
| 6485  | PINK1    | 2542.058747 | 0.451218285 | 0.111846 | 4.034279 | 5.48E-05 | 0.000166 |
| 9806  | GDAP1    | 196.6522602 | 0.451150829 | 0.166191 | 2.714645 | 0.006635 | 0.013261 |
| 15461 | MAGEA8   | 0.480763503 | 0.451123729 | 0.516906 | 0.872738 | 0.382806 | 0.485331 |
| 8609  | APLF     | 79.8307732  | 0.451051085 | 0.142246 | 3.170928 | 0.00152  | 0.00346  |
| 7883  | ACVR2B   | 298.097323  | 0.451018954 | 0.130528 | 3.455346 | 0.00055  | 0.001366 |
| 5810  | KIAA0947 | 992.8157319 | 0.451002748 | 0.103195 | 4.370412 | 1.24E-05 | 4.18E-05 |
| 8616  | MTERFD3  | 394.6036414 | 0.450897769 | 0.14229  | 3.168872 | 0.00153  | 0.003481 |
| 8588  | ANKRD13  | 2355.339092 | 0.450678513 | 0.141814 | 3.17795  | 0.001483 | 0.003385 |
| 5209  | CNST     | 664.7227642 | 0.450589802 | 0.096409 | 4.673748 | 2.96E-06 | 1.11E-05 |
| 7205  | TIGD7    | 256.0713574 | 0.450510793 | 0.12041  | 3.741468 | 0.000183 | 0.000498 |
| 14445 | HAPLN4   | 28.11913756 | 0.450423205 | 0.380484 | 1.183817 | 0.236486 | 0.320877 |
| 8674  | ZNF611   | 420.2102033 | 0.450238893 | 0.143332 | 3.14123  | 0.001682 | 0.003802 |
| 8072  | ANUBL1   | 119.295249  | 0.450184505 | 0.133057 | 3.383393 | 0.000716 | 0.001739 |
| 8859  | CDK8     | 143.1417918 | 0.450129078 | 0.146769 | 3.066919 | 0.002163 | 0.004785 |
| 6852  | SPPL2A   | 894.0135411 | 0.45010909  | 0.116024 | 3.879448 | 0.000105 | 0.000299 |
| 11526 | EDARADD  | 107.8909138 | 0.449646456 | 0.213214 | 2.108897 | 0.034954 | 0.059442 |
| 9800  | CISD1    | 1058.64439  | 0.449546853 | 0.16546  | 2.716952 | 0.006589 | 0.013178 |
| 5021  | MTX2     | 674.0457458 | 0.449367712 | 0.094352 | 4.762668 | 1.91E-06 | 7.46E-06 |
| 7048  | RBM27    | 943.0708978 | 0.449333036 | 0.1182   | 3.80145  | 0.000144 | 0.0004   |
| 7049  | MED22    | 596.6852626 | 0.449304354 | 0.118217 | 3.800683 | 0.000144 | 0.000401 |
| 6811  | ST13     | 7311.695451 | 0.448892327 | 0.11524  | 3.895273 | 9.81E-05 | 0.000282 |
| 4534  | SMCR7L   | 1257.263629 | 0.448762342 | 0.089448 | 5.017044 | 5.25E-07 | 2.27E-06 |
| 8032  | MTERF    | 190.3593926 | 0.448692777 | 0.132018 | 3.398717 | 0.000677 | 0.001652 |
| 8646  | KIAA0040 | 1241.432245 | 0.448637147 | 0.142298 | 3.152801 | 0.001617 | 0.003666 |
| 4903  | FBXO11   | 1244.078504 | 0.448442757 | 0.092948 | 4.824682 | 1.40E-06 | 5.60E-06 |
| 6085  | INPP5F   | 430.9066452 | 0.448317954 | 0.106055 | 4.227207 | 2.37E-05 | 7.62E-05 |
| 3917  | CCDC43   | 495.5745671 | 0.44809972  | 0.083105 | 5.391975 | 6.97E-08 | 3.49E-07 |
| 7464  | GRLF1    | 2434.981839 | 0.44805694  | 0.123414 | 3.630512 | 0.000283 | 0.000743 |
| 7817  | PCNP     | 3189.216372 | 0.447965601 | 0.128135 | 3.496041 | 0.000472 | 0.001184 |
| 13455 | C9orf47  | 20.71722886 | 0.447955981 | 0.298612 | 1.500127 | 0.133582 | 0.194585 |
| 7208  | ZKSCAN2  | 185.0228106 | 0.447948549 | 0.119742 | 3.740959 | 0.000183 | 0.000499 |
| 6525  | GALT     | 391.1211954 | 0.447701223 | 0.111491 | 4.015589 | 5.93E-05 | 0.000178 |
| 9169  | ZNF680   | 254.4196469 | 0.447654799 | 0.151783 | 2.949311 | 0.003185 | 0.006808 |
| 7530  | OXSM     | 207.7337407 | 0.447632986 | 0.124184 | 3.604594 | 0.000313 | 0.000814 |
| 6719  | BIRC6    | 2044.071426 | 0.447610562 | 0.113814 | 3.932808 | 8.40E-05 | 0.000245 |
| 11995 | FHOD3    | 837.6704793 | 0.447600342 | 0.228117 | 1.962155 | 0.049744 | 0.081285 |
| 4692  | UPRT     | 310.3414675 | 0.447264446 | 0.09066  | 4.933404 | 8.08E-07 | 3.38E-06 |
| 8310  | EML1     | 672.6444549 | 0.447123217 | 0.135963 | 3.288555 | 0.001007 | 0.002375 |
| 8934  | RIN2     | 1798.569279 | 0.447121004 | 0.147079 | 3.040011 | 0.002366 | 0.00519  |

|       |           |             |             |          |          |          |          |
|-------|-----------|-------------|-------------|----------|----------|----------|----------|
| 9775  | CSNK2A1F  | 497.2078364 | 0.446977468 | 0.164094 | 2.723917 | 0.006451 | 0.012936 |
| 12052 | SEMA6A    | 2039.362658 | 0.446769739 | 0.229922 | 1.943132 | 0.052    | 0.084572 |
| 7797  | C14orf129 | 474.3168043 | 0.446437766 | 0.127463 | 3.502498 | 0.000461 | 0.001159 |
| 3321  | YTHDC1    | 1578.75164  | 0.446315311 | 0.076927 | 5.801808 | 6.56E-09 | 3.87E-08 |
| 9395  | TAF1L     | 17.73225365 | 0.446261871 | 0.156001 | 2.860631 | 0.004228 | 0.008821 |
| 3604  | HTATSF1   | 1538.498068 | 0.446186696 | 0.079624 | 5.603678 | 2.10E-08 | 1.14E-07 |
| 7524  | C6orf182  | 142.6945918 | 0.446052488 | 0.12369  | 3.606219 | 0.000311 | 0.000809 |
| 6902  | KIAA0196  | 1282.269624 | 0.445602112 | 0.115316 | 3.864177 | 0.000111 | 0.000317 |
| 6343  | ZSCAN12   | 183.0057308 | 0.445300587 | 0.108415 | 4.107369 | 4.00E-05 | 0.000124 |
| 7339  | UBA3      | 810.3231088 | 0.445243323 | 0.120842 | 3.684506 | 0.000229 | 0.000612 |
| 5318  | DSCR3     | 1329.739128 | 0.445167168 | 0.096505 | 4.612881 | 3.97E-06 | 1.46E-05 |
| 9444  | MAP3K2    | 732.5661769 | 0.445050007 | 0.156678 | 2.840539 | 0.004504 | 0.009347 |
| 8220  | LOC401588 | 65.46371601 | 0.444702863 | 0.133785 | 3.323999 | 0.000887 | 0.002116 |
| 7496  | TMX2      | 1906.819328 | 0.44463097  | 0.122856 | 3.61911  | 0.000296 | 0.000773 |
| 7768  | CCDC66    | 163.5029347 | 0.44462923  | 0.126679 | 3.509889 | 0.000448 | 0.001131 |
| 8479  | ZNF846    | 75.75134146 | 0.444297529 | 0.138149 | 3.216082 | 0.0013   | 0.003004 |
| 3088  | SLTM      | 1624.777402 | 0.444226311 | 0.074394 | 5.971236 | 2.35E-09 | 1.49E-08 |
| 12636 | PLCD4     | 161.2745168 | 0.444153521 | 0.251961 | 1.762787 | 0.077936 | 0.120895 |
| 13471 | CXorf57   | 211.6652984 | 0.444090566 | 0.296758 | 1.496476 | 0.13453  | 0.195748 |
| 10632 | NEU3      | 92.49756089 | 0.444072107 | 0.183391 | 2.421451 | 0.015459 | 0.028494 |
| 4253  | MYST2     | 943.9876187 | 0.444049408 | 0.085721 | 5.180191 | 2.22E-07 | 1.02E-06 |
| 8077  | C14orf128 | 67.37686765 | 0.443932493 | 0.131358 | 3.379549 | 0.000726 | 0.001762 |
| 5689  | BCAS2     | 636.8679788 | 0.443915969 | 0.100287 | 4.426465 | 9.58E-06 | 3.30E-05 |
| 8138  | CHP       | 2882.262729 | 0.443819162 | 0.132186 | 3.35754  | 0.000786 | 0.001894 |
| 4614  | CRK       | 1019.925027 | 0.443734801 | 0.089051 | 4.982939 | 6.26E-07 | 2.66E-06 |
| 9678  | OSTM1     | 1560.220424 | 0.443605471 | 0.161063 | 2.754229 | 0.005883 | 0.011914 |
| 7465  | OTUD4     | 1345.509219 | 0.443586662 | 0.122201 | 3.629981 | 0.000283 | 0.000744 |
| 6648  | ERBB2IP   | 2504.655043 | 0.443538933 | 0.111931 | 3.9626   | 7.41E-05 | 0.000219 |
| 8350  | PGRMC2    | 3003.361054 | 0.443489013 | 0.13543  | 3.274663 | 0.001058 | 0.002483 |
| 6001  | TRIM37    | 471.1282495 | 0.443398463 | 0.103924 | 4.266582 | 1.98E-05 | 6.48E-05 |
| 11256 | ZDBF2     | 224.6405436 | 0.443277972 | 0.201703 | 2.197677 | 0.027972 | 0.04871  |
| 8528  | RBBP9     | 1025.472756 | 0.443168352 | 0.13869  | 3.195399 | 0.001396 | 0.003209 |
| 7463  | TMOD3     | 1795.778767 | 0.44315509  | 0.122048 | 3.630986 | 0.000282 | 0.000742 |
| 6628  | ZDHHC17   | 823.1840429 | 0.443136353 | 0.111533 | 3.973124 | 7.09E-05 | 0.00021  |
| 6334  | RNF20     | 1132.241122 | 0.44311223  | 0.107796 | 4.110657 | 3.95E-05 | 0.000122 |
| 6616  | CPSF2     | 980.8625739 | 0.442924084 | 0.111362 | 3.977353 | 6.97E-05 | 0.000206 |
| 8543  | CASP8AP2  | 302.0556716 | 0.442851464 | 0.138739 | 3.191978 | 0.001413 | 0.003242 |
| 11118 | MMRN2     | 2032.249316 | 0.442637778 | 0.197099 | 2.245759 | 0.024719 | 0.04358  |
| 5363  | DNM1L     | 1613.690018 | 0.442503647 | 0.09651  | 4.58505  | 4.54E-06 | 1.66E-05 |
| 12852 | FAM22F    | 3.293332135 | 0.442444629 | 0.261695 | 1.69069  | 0.090896 | 0.138629 |
| 5442  | SON       | 5051.755896 | 0.442346415 | 0.097309 | 4.545804 | 5.47E-06 | 1.97E-05 |
| 8428  | BTBD3     | 1266.541388 | 0.442338901 | 0.136574 | 3.238812 | 0.0012   | 0.002791 |
| 6495  | ZNF607    | 163.2099007 | 0.442108477 | 0.10967  | 4.031251 | 5.55E-05 | 0.000167 |
| 7689  | C2orf86   | 107.660563  | 0.442056968 | 0.124754 | 3.543426 | 0.000395 | 0.001007 |
| 6008  | PLDN      | 1685.319954 | 0.442027508 | 0.103707 | 4.26229  | 2.02E-05 | 6.60E-05 |
| 10219 | C11orf65  | 10.40473509 | 0.441983891 | 0.171677 | 2.574508 | 0.010038 | 0.019254 |
| 8962  | OC1001288 | 87.40024929 | 0.441575422 | 0.145916 | 3.026233 | 0.002476 | 0.005416 |



|       |           |             |             |          |          |          |          |
|-------|-----------|-------------|-------------|----------|----------|----------|----------|
| 6288  | BIRC2     | 1620.593409 | 0.441548892 | 0.106783 | 4.135012 | 3.55E-05 | 0.000111 |
| 6371  | RGPD4     | 151.7555819 | 0.441523126 | 0.107879 | 4.092751 | 4.26E-05 | 0.000131 |
| 13610 | IDO1      | 674.4240844 | 0.441429904 | 0.303901 | 1.452543 | 0.146351 | 0.210773 |
| 7759  | GFPT1     | 2597.997952 | 0.441295168 | 0.125556 | 3.514728 | 0.00044  | 0.001112 |
| 6383  | ZNF839    | 235.6806509 | 0.440884421 | 0.107912 | 4.085601 | 4.40E-05 | 0.000135 |
| 9501  | PMM1      | 1088.698499 | 0.440826481 | 0.156329 | 2.81986  | 0.004804 | 0.009912 |
| 10465 | HIF1A     | 4462.21989  | 0.440766327 | 0.177167 | 2.487852 | 0.012852 | 0.024071 |
| 7549  | MKLN1     | 2007.348919 | 0.440706255 | 0.122572 | 3.595475 | 0.000324 | 0.000841 |
| 11014 | CDNF      | 29.20279207 | 0.440591185 | 0.192756 | 2.285746 | 0.022269 | 0.039631 |
| 7085  | NR2C2     | 838.0819738 | 0.440417533 | 0.116216 | 3.789662 | 0.000151 | 0.000417 |
| 6693  | MAGT1     | 3289.20602  | 0.440387875 | 0.111709 | 3.942292 | 8.07E-05 | 0.000236 |
| 11356 | TCEAL6    | 19.82031417 | 0.440247473 | 0.203351 | 2.164965 | 0.03039  | 0.052456 |
| 6637  | PPP1R3D   | 244.7070005 | 0.440159553 | 0.110889 | 3.96937  | 7.21E-05 | 0.000213 |
| 9400  | MGC21881  | 178.6745745 | 0.440145112 | 0.153946 | 2.859091 | 0.004249 | 0.008859 |
| 10069 | JUP       | 4127.365771 | 0.44012267  | 0.167379 | 2.62949  | 0.008551 | 0.016647 |
| 13647 | ZSCAN1    | 3.629018112 | 0.440019317 | 0.305743 | 1.439179 | 0.1501   | 0.215586 |
| 8814  | GRAMD3    | 932.9437637 | 0.439882287 | 0.142685 | 3.08289  | 0.00205  | 0.004559 |
| 10311 | ZNF860    | 49.00763001 | 0.43984439  | 0.173012 | 2.542283 | 0.011013 | 0.020936 |
| 7888  | SAR1B     | 746.9010418 | 0.439829033 | 0.127338 | 3.454015 | 0.000552 | 0.001372 |
| 8648  | SETD7     | 2303.081327 | 0.439611808 | 0.139491 | 3.151542 | 0.001624 | 0.003681 |
| 5371  | EIF2S1    | 1380.910752 | 0.439571742 | 0.095921 | 4.582661 | 4.59E-06 | 1.68E-05 |
| 16795 | NPHS2     | 10.15834315 | 0.439411158 | 0.894705 | 0.491124 | 0.623339 | 0.727482 |
| 6946  | CRNA0008  | 374.163928  | 0.439410171 | 0.114225 | 3.846883 | 0.00012  | 0.000338 |
| 8040  | PIK3CB    | 1470.596878 | 0.439319129 | 0.12936  | 3.396086 | 0.000684 | 0.001666 |
| 7998  | ARMCX1    | 489.6284888 | 0.439195594 | 0.128779 | 3.410447 | 0.000649 | 0.001589 |
| 7226  | TBCEL     | 358.9306082 | 0.439169531 | 0.117547 | 3.736109 | 0.000187 | 0.000507 |
| 10277 | LCA5      | 234.9769674 | 0.439156271 | 0.171897 | 2.554758 | 0.010626 | 0.020267 |
| 11474 | DC1001305 | 54.99878044 | 0.439089571 | 0.206334 | 2.128047 | 0.033333 | 0.056942 |
| 7705  | ZNF302    | 695.2931972 | 0.438660996 | 0.123946 | 3.539118 | 0.000401 | 0.001021 |
| 10790 | SCML1     | 275.4610489 | 0.438613134 | 0.185432 | 2.365354 | 0.018013 | 0.032722 |
| 8805  | DEK       | 2252.420207 | 0.438461796 | 0.14212  | 3.085157 | 0.002034 | 0.004529 |
| 8390  | ZNF624    | 110.0872207 | 0.438421709 | 0.134724 | 3.254223 | 0.001137 | 0.002656 |
| 14811 | SLC39A5   | 691.1007138 | 0.438170468 | 0.412822 | 1.061402 | 0.288507 | 0.381813 |
| 13669 | ZNF492    | 4.430286383 | 0.438083944 | 0.305918 | 1.43203  | 0.152135 | 0.218158 |
| 12631 | THBS1     | 11007.36417 | 0.438038275 | 0.248314 | 1.764052 | 0.077723 | 0.120612 |
| 7982  | UBE2CBP   | 59.49734504 | 0.43779906  | 0.128078 | 3.418217 | 0.00063  | 0.001548 |
| 6365  | C1orf163  | 167.1381256 | 0.437510312 | 0.106831 | 4.095338 | 4.22E-05 | 0.00013  |
| 10541 | LOC653113 | 37.3907496  | 0.437388287 | 0.178118 | 2.455617 | 0.014064 | 0.026153 |
| 11998 | CMAH      | 299.3513527 | 0.437195708 | 0.22297  | 1.96078  | 0.049905 | 0.081522 |
| 6494  | ZNF222    | 64.09477306 | 0.436816992 | 0.108358 | 4.031256 | 5.55E-05 | 0.000167 |
| 12183 | GNAL      | 72.42364246 | 0.436807538 | 0.229702 | 1.901624 | 0.05722  | 0.092061 |
| 5046  | C16orf62  | 1258.162907 | 0.436790628 | 0.09196  | 4.749815 | 2.04E-06 | 7.91E-06 |
| 7279  | CREB1     | 1125.123574 | 0.436566267 | 0.117721 | 3.708472 | 0.000209 | 0.000561 |
| 7173  | GSPT1     | 2743.6191   | 0.436539676 | 0.116271 | 3.754509 | 0.000174 | 0.000475 |
| 7209  | ADSS      | 991.3833823 | 0.436515525 | 0.11672  | 3.739845 | 0.000184 | 0.000501 |
| 5814  | ORC2L     | 406.0743771 | 0.436484481 | 0.09996  | 4.366607 | 1.26E-05 | 4.25E-05 |
| 10097 | SP4       | 241.7673835 | 0.436460068 | 0.166773 | 2.617084 | 0.008868 | 0.017216 |

|       |           |             |             |          |          |          |          |
|-------|-----------|-------------|-------------|----------|----------|----------|----------|
| 12523 | C18orf56  | 40.10939941 | 0.436383339 | 0.242872 | 1.796766 | 0.072373 | 0.113244 |
| 6633  | PPAPDC2   | 243.3230025 | 0.436342112 | 0.109868 | 3.971518 | 7.14E-05 | 0.000211 |
| 6389  | EIF3A     | 4605.921913 | 0.436331115 | 0.106942 | 4.08007  | 4.50E-05 | 0.000138 |
| 17010 | AGTR2     | 0.668530295 | 0.436197611 | 0.996774 | 0.437609 | 0.66167  | 0.762457 |
| 6057  | ARID4B    | 995.1639744 | 0.436133536 | 0.102826 | 4.241482 | 2.22E-05 | 7.19E-05 |
| 11700 | PPM1K     | 326.3018583 | 0.436048506 | 0.212562 | 2.051392 | 0.040229 | 0.067395 |
| 9847  | C16orf5   | 1586.808159 | 0.435911285 | 0.161132 | 2.705309 | 0.006824 | 0.013584 |
| 6865  | C11orf58  | 3446.811006 | 0.435888289 | 0.112446 | 3.876438 | 0.000106 | 0.000303 |
| 11862 | CREB5     | 863.8720499 | 0.435810729 | 0.217647 | 2.002372 | 0.045245 | 0.074763 |
| 5794  | APP       | 30293.74733 | 0.435809073 | 0.099582 | 4.376397 | 1.21E-05 | 4.08E-05 |
| 11078 | COX7B     | 2616.580776 | 0.4357498   | 0.192522 | 2.263374 | 0.023613 | 0.041779 |
| 15110 | ATP5L2    | 0.615446218 | 0.43547525  | 0.447635 | 0.972835 | 0.330635 | 0.428907 |
| 10052 | APEH      | 1615.884591 | 0.43544545  | 0.16526  | 2.634906 | 0.008416 | 0.016411 |
| 11301 | TIAM2     | 45.36185026 | 0.435308058 | 0.199853 | 2.178137 | 0.029396 | 0.050986 |
| 8238  | ESF1      | 429.8581894 | 0.435305987 | 0.131252 | 3.316575 | 0.000911 | 0.002168 |
| 11994 | MAPK8IP1  | 353.346386  | 0.435217322 | 0.221766 | 1.96251  | 0.049703 | 0.081232 |
| 5989  | KIAA1143  | 594.2109147 | 0.434986352 | 0.101769 | 4.274262 | 1.92E-05 | 6.28E-05 |
| 5389  | RLIM      | 1465.535266 | 0.434973297 | 0.095127 | 4.572563 | 4.82E-06 | 1.75E-05 |
| 12490 | FGF2      | 550.1802787 | 0.434926659 | 0.240753 | 1.806527 | 0.070836 | 0.111166 |
| 6743  | RG9MTD2   | 111.3799321 | 0.4348758   | 0.110842 | 3.923383 | 8.73E-05 | 0.000254 |
| 4625  | CWC25     | 467.9261724 | 0.434841435 | 0.087356 | 4.977817 | 6.43E-07 | 2.73E-06 |
| 7486  | FERMT2    | 1624.196035 | 0.4348045   | 0.120082 | 3.620882 | 0.000294 | 0.000769 |
| 11982 | TMEM204   | 785.1342207 | 0.434393844 | 0.221069 | 1.96497  | 0.049418 | 0.080848 |
| 10743 | UQCRHL    | 346.236207  | 0.434276176 | 0.182223 | 2.383218 | 0.017162 | 0.031313 |
| 2085  | SNX1      | 2494.616891 | 0.434270986 | 0.063265 | 6.864302 | 6.68E-12 | 6.28E-11 |
| 7283  | ZNF571    | 90.19007023 | 0.434206719 | 0.117146 | 3.706558 | 0.00021  | 0.000565 |
| 6322  | TAF9B     | 713.1711027 | 0.433901166 | 0.105425 | 4.115749 | 3.86E-05 | 0.00012  |
| 7537  | SLC33A1   | 937.4241252 | 0.433800107 | 0.120475 | 3.600741 | 0.000317 | 0.000825 |
| 8957  | ZNF57     | 79.89088441 | 0.433625836 | 0.143211 | 3.027891 | 0.002463 | 0.005389 |
| 7475  | SLC25A13  | 963.0059114 | 0.433253138 | 0.119476 | 3.626282 | 0.000288 | 0.000754 |
| 7336  | C14orf45  | 163.5188226 | 0.433167461 | 0.11749  | 3.686851 | 0.000227 | 0.000607 |
| 10885 | GALNT12   | 309.9755595 | 0.433098668 | 0.186233 | 2.325576 | 0.020041 | 0.036087 |
| 10788 | LOC283922 | 55.63158981 | 0.43309759  | 0.183048 | 2.36603  | 0.01798  | 0.032666 |
| 2865  | KIAA0562  | 742.5846225 | 0.432504449 | 0.070528 | 6.132366 | 8.66E-10 | 5.92E-09 |
| 9592  | REV3L     | 606.1924767 | 0.432297393 | 0.155363 | 2.782493 | 0.005394 | 0.011023 |
| 9807  | TMEM106C  | 1781.724482 | 0.432242547 | 0.159227 | 2.714633 | 0.006635 | 0.013261 |
| 6393  | ZNF225    | 89.75983254 | 0.432040585 | 0.105939 | 4.078196 | 4.54E-05 | 0.000139 |
| 6855  | ZNF76     | 524.5056096 | 0.432034739 | 0.111383 | 3.878826 | 0.000105 | 0.0003   |
| 6223  | SNX9      | 1751.467927 | 0.431838524 | 0.103606 | 4.168067 | 3.07E-05 | 9.68E-05 |
| 10601 | SLFN13    | 854.2244594 | 0.431543498 | 0.177197 | 2.435383 | 0.014876 | 0.027505 |
| 11314 | N4BP2     | 145.3323219 | 0.431437497 | 0.198418 | 2.174389 | 0.029676 | 0.051408 |
| 5567  | HBS1L     | 769.231476  | 0.431132651 | 0.096035 | 4.489315 | 7.15E-06 | 2.52E-05 |
| 16387 | CRX       | 0.762293317 | 0.43113008  | 0.714414 | 0.603474 | 0.546193 | 0.653279 |
| 13785 | GCNT1     | 272.670934  | 0.430827046 | 0.309513 | 1.391954 | 0.163936 | 0.233103 |
| 8677  | ADCY6     | 1358.634948 | 0.430641648 | 0.137144 | 3.140065 | 0.001689 | 0.003815 |
| 13438 | DEPDC7    | 197.827261  | 0.430588995 | 0.286425 | 1.503322 | 0.132756 | 0.193641 |
| 14845 | TEKT2     | 19.56731964 | 0.430540578 | 0.408867 | 1.053009 | 0.292337 | 0.385995 |

|       |           |             |             |          |          |          |          |
|-------|-----------|-------------|-------------|----------|----------|----------|----------|
| 11315 | RUNDC2C   | 32.76488147 | 0.43052365  | 0.197996 | 2.174406 | 0.029675 | 0.051408 |
| 11789 | NOTCH4    | 2095.111143 | 0.43048913  | 0.212566 | 2.025203 | 0.042846 | 0.071239 |
| 5888  | EPC2      | 594.542078  | 0.430472945 | 0.099455 | 4.328337 | 1.50E-05 | 5.00E-05 |
| 8920  | LOC150786 | 52.32216171 | 0.429983003 | 0.141253 | 3.044071 | 0.002334 | 0.005129 |
| 7298  | KIF5B     | 3382.910975 | 0.42992019  | 0.116189 | 3.700177 | 0.000215 | 0.000579 |
| 6391  | IMMT      | 2254.387913 | 0.429863683 | 0.105386 | 4.078926 | 4.52E-05 | 0.000139 |
| 6583  | UBE2K     | 1808.85463  | 0.429758329 | 0.107699 | 3.990357 | 6.60E-05 | 0.000196 |
| 11105 | C17orf76  | 61.82695582 | 0.429736236 | 0.190899 | 2.25112  | 0.024378 | 0.043029 |
| 6499  | USPL1     | 464.1657133 | 0.429715122 | 0.106639 | 4.029638 | 5.59E-05 | 0.000168 |
| 6600  | C5orf51   | 925.4815752 | 0.429369531 | 0.10778  | 3.983756 | 6.78E-05 | 0.000201 |
| 11729 | ALCAM     | 1639.787441 | 0.429303993 | 0.210124 | 2.043101 | 0.041042 | 0.068588 |
| 5383  | STARD7    | 3333.322471 | 0.429269696 | 0.093797 | 4.576568 | 4.73E-06 | 1.72E-05 |
| 14660 | GBP7      | 7.846062805 | 0.429024119 | 0.385351 | 1.113334 | 0.265565 | 0.355071 |
| 10421 | EDA2R     | 318.2731626 | 0.428852302 | 0.171367 | 2.502541 | 0.012331 | 0.023193 |
| 8767  | RNFT1     | 290.4960055 | 0.42882816  | 0.138474 | 3.096814 | 0.001956 | 0.004373 |
| 5731  | C17orf39  | 331.4809042 | 0.428785158 | 0.09729  | 4.40729  | 1.05E-05 | 3.58E-05 |
| 4865  | FAM149B1  | 556.9444609 | 0.42868586  | 0.088305 | 4.854602 | 1.21E-06 | 4.86E-06 |
| 10087 | TAF13     | 157.7078184 | 0.428642494 | 0.163481 | 2.621978 | 0.008742 | 0.016988 |
| 13611 | FLG       | 62.52792197 | 0.428630368 | 0.295185 | 1.452071 | 0.146482 | 0.210946 |
| 6613  | JAK1      | 6325.304519 | 0.428469446 | 0.107686 | 3.978884 | 6.92E-05 | 0.000205 |
| 15228 | CHRN4     | 5.707687755 | 0.428217615 | 0.455874 | 0.939334 | 0.347559 | 0.447338 |
| 9484  | SH3BGR1   | 3862.233111 | 0.428194834 | 0.151595 | 2.824604 | 0.004734 | 0.009784 |
| 11489 | UQCRC1    | 3375.245708 | 0.428173668 | 0.201575 | 2.124145 | 0.033658 | 0.057423 |
| 10811 | UQCRH     | 1361.228611 | 0.427942578 | 0.181442 | 2.358559 | 0.018346 | 0.033262 |
| 8466  | PBRM1     | 784.7518762 | 0.427939985 | 0.132882 | 3.220451 | 0.00128  | 0.002963 |
| 7641  | ZC3H7B    | 2618.146468 | 0.427871296 | 0.120045 | 3.564246 | 0.000365 | 0.000936 |
| 7697  | INTS2     | 364.0304225 | 0.427804951 | 0.120831 | 3.540511 | 0.000399 | 0.001017 |
| 8749  | PGPEP1    | 1483.261795 | 0.427772722 | 0.137575 | 3.109372 | 0.001875 | 0.0042   |
| 4573  | CYP20A1   | 581.9925507 | 0.42770108  | 0.085573 | 4.998093 | 5.79E-07 | 2.48E-06 |
| 4536  | USP7      | 2260.545863 | 0.427544441 | 0.085238 | 5.015865 | 5.28E-07 | 2.28E-06 |
| 10893 | ZNF660    | 17.28260027 | 0.427346076 | 0.183975 | 2.322843 | 0.020188 | 0.036328 |
| 6086  | SIKE1     | 750.5707738 | 0.427201898 | 0.101066 | 4.226964 | 2.37E-05 | 7.63E-05 |
| 5733  | ZBTB34    | 321.6731004 | 0.427127588 | 0.096936 | 4.406272 | 1.05E-05 | 3.60E-05 |
| 2362  | MRFAP1L1  | 1260.168247 | 0.427125354 | 0.064744 | 6.597129 | 4.19E-11 | 3.48E-10 |
| 2734  | C17orf80  | 538.0337002 | 0.426905505 | 0.068285 | 6.251792 | 4.06E-10 | 2.91E-09 |
| 7723  | ZNF175    | 217.3444274 | 0.426868432 | 0.120873 | 3.531545 | 0.000413 | 0.001049 |
| 15259 | TNIP3     | 57.1927935  | 0.42674137  | 0.458261 | 0.931219 | 0.35174  | 0.451829 |
| 7538  | ANGEL1    | 503.8258377 | 0.426674566 | 0.118499 | 3.600673 | 0.000317 | 0.000825 |
| 11465 | KCNE3     | 1778.357774 | 0.426673091 | 0.200319 | 2.129965 | 0.033175 | 0.056716 |
| 13525 | C17orf46  | 2.042608691 | 0.426491345 | 0.288289 | 1.47939  | 0.139036 | 0.201497 |
| 8153  | ZNF749    | 58.69650086 | 0.426394568 | 0.127314 | 3.349153 | 0.000811 | 0.001949 |
| 12659 | GBP4      | 2613.132258 | 0.426389212 | 0.242985 | 1.754799 | 0.079294 | 0.122777 |
| 7550  | FAM200A   | 215.1092802 | 0.426290764 | 0.118575 | 3.595114 | 0.000324 | 0.000842 |
| 7521  | CHCHD4    | 248.5515496 | 0.426287609 | 0.11817  | 3.607415 | 0.000309 | 0.000806 |
| 8770  | ZNF322B   | 26.7983549  | 0.426197874 | 0.137665 | 3.095895 | 0.001962 | 0.004386 |
| 6781  | DUSP11    | 532.934029  | 0.426147272 | 0.109061 | 3.907417 | 9.33E-05 | 0.00027  |
| 5386  | TPP2      | 1024.748874 | 0.425959927 | 0.093097 | 4.575462 | 4.75E-06 | 1.73E-05 |

|       |          |             |             |          |          |          |          |
|-------|----------|-------------|-------------|----------|----------|----------|----------|
| 6886  | REXO2    | 1014.692185 | 0.42573882  | 0.110029 | 3.869322 | 0.000109 | 0.000311 |
| 8318  | ELK4     | 174.058161  | 0.425662683 | 0.12963  | 3.283671 | 0.001025 | 0.002415 |
| 10408 | TMX4     | 1556.89579  | 0.425286403 | 0.169637 | 2.507045 | 0.012175 | 0.022929 |
| 5758  | CTBP2    | 1729.698762 | 0.425270416 | 0.09681  | 4.392823 | 1.12E-05 | 3.81E-05 |
| 13049 | BMP2     | 541.4629631 | 0.425171392 | 0.260744 | 1.630608 | 0.102973 | 0.154676 |
| 16567 | HRG      | 4.104307278 | 0.425150177 | 0.766231 | 0.554859 | 0.578991 | 0.684984 |
| 7184  | KIAA1279 | 736.1187061 | 0.424971404 | 0.113318 | 3.750265 | 0.000177 | 0.000482 |
| 12615 | ANO2     | 42.3376564  | 0.424932303 | 0.240472 | 1.767079 | 0.077215 | 0.119957 |
| 8001  | FAM96A   | 979.549053  | 0.424771062 | 0.124585 | 3.409485 | 0.000651 | 0.001594 |
| 15824 | KIR3DX1  | 0.516388678 | 0.424726882 | 0.553366 | 0.767534 | 0.442764 | 0.548447 |
| 8785  | WDR6     | 2108.279772 | 0.424707321 | 0.1374   | 3.091028 | 0.001995 | 0.00445  |
| 9713  | DUSP19   | 135.8511068 | 0.424264222 | 0.154614 | 2.744022 | 0.006069 | 0.012248 |
| 5538  | RAD23B   | 3269.190552 | 0.424049734 | 0.094169 | 4.503061 | 6.70E-06 | 2.37E-05 |
| 6850  | DCLRE1A  | 324.8084776 | 0.423890295 | 0.109261 | 3.8796   | 0.000105 | 0.000299 |
| 12602 | LRRC36   | 31.52006202 | 0.423792657 | 0.239128 | 1.772243 | 0.076354 | 0.118761 |
| 9856  | FOXRED1  | 440.6753449 | 0.423740698 | 0.156866 | 2.701291 | 0.006907 | 0.013737 |
| 11601 | CACHD1   | 268.9828001 | 0.423256148 | 0.203473 | 2.08016  | 0.037511 | 0.063378 |
| 8013  | LRRC8A   | 1697.338748 | 0.423076551 | 0.124228 | 3.405646 | 0.00066  | 0.001615 |
| 9309  | GAS8     | 668.8692777 | 0.423049258 | 0.146044 | 2.896717 | 0.003771 | 0.00794  |
| 10197 | MYCBP2   | 1443.629604 | 0.42295874  | 0.163785 | 2.582402 | 0.009812 | 0.01886  |
| 8439  | NMD3     | 1340.095577 | 0.422939433 | 0.130895 | 3.231136 | 0.001233 | 0.002864 |
| 3649  | NECAP1   | 838.0344877 | 0.422890258 | 0.075895 | 5.572049 | 2.52E-08 | 1.35E-07 |
| 15216 | C11orf20 | 4.116409146 | 0.422805801 | 0.448136 | 0.943476 | 0.345437 | 0.444987 |
| 5033  | ZNF416   | 112.2303369 | 0.422796395 | 0.088861 | 4.757933 | 1.96E-06 | 7.62E-06 |
| 9094  | NDUFB5   | 1793.299732 | 0.42264597  | 0.141869 | 2.979132 | 0.002891 | 0.00623  |
| 4493  | PIGY     | 1358.655056 | 0.42260235  | 0.083812 | 5.042256 | 4.60E-07 | 2.01E-06 |
| 13531 | NOVA1    | 220.800896  | 0.422580572 | 0.286212 | 1.476458 | 0.139821 | 0.202545 |
| 6220  | MDM1     | 242.9412264 | 0.422516313 | 0.10133  | 4.169708 | 3.05E-05 | 9.61E-05 |
| 7280  | WDR47    | 429.7139182 | 0.422509255 | 0.113942 | 3.708119 | 0.000209 | 0.000562 |
| 4147  | NEK9     | 1877.935892 | 0.422478384 | 0.080436 | 5.252371 | 1.50E-07 | 7.10E-07 |
| 9445  | SPATS2L  | 3600.186458 | 0.422261596 | 0.14866  | 2.840449 | 0.004505 | 0.009349 |
| 10274 | FAM151B  | 20.13196962 | 0.422229411 | 0.165253 | 2.555056 | 0.010617 | 0.020255 |
| 10329 | NDUFA6   | 1541.71963  | 0.422049255 | 0.16635  | 2.537113 | 0.011177 | 0.02121  |
| 7577  | FBXO28   | 1223.401489 | 0.422011674 | 0.117652 | 3.586935 | 0.000335 | 0.000866 |
| 7843  | ACTR8    | 411.1622329 | 0.421856982 | 0.121301 | 3.47776  | 0.000506 | 0.001264 |
| 11127 | SH3TC2   | 30.25273271 | 0.421739148 | 0.187961 | 2.243753 | 0.024848 | 0.043772 |
| 3191  | SMU1     | 1384.00371  | 0.421555741 | 0.071594 | 5.88816  | 3.91E-09 | 2.40E-08 |
| 5709  | PRDM10   | 205.6428032 | 0.421090311 | 0.095373 | 4.415208 | 1.01E-05 | 3.46E-05 |
| 7126  | DDX59    | 407.9869365 | 0.421007115 | 0.111535 | 3.774651 | 0.00016  | 0.000441 |
| 6457  | SEH1L    | 826.5189582 | 0.420878239 | 0.10402  | 4.046147 | 5.21E-05 | 0.000158 |
| 9140  | PPAT     | 318.1499958 | 0.420827595 | 0.142098 | 2.961536 | 0.003061 | 0.006565 |
| 15231 | DCDC2B   | 0.689851613 | 0.420542228 | 0.448038 | 0.93863  | 0.347921 | 0.447744 |
| 6844  | PEX13    | 696.2251856 | 0.420385248 | 0.108291 | 3.881989 | 0.000104 | 0.000297 |
| 6512  | NUFIP2   | 2496.911224 | 0.420209859 | 0.104456 | 4.022832 | 5.75E-05 | 0.000173 |
| 10364 | ZNF501   | 55.25107032 | 0.420193996 | 0.166609 | 2.522036 | 0.011668 | 0.022067 |
| 7923  | ATF1     | 487.5171293 | 0.420149572 | 0.122152 | 3.439555 | 0.000583 | 0.001441 |
| 9612  | ZNF615   | 289.5770046 | 0.42014623  | 0.151395 | 2.775159 | 0.005517 | 0.011251 |

|       |          |             |             |          |          |          |          |
|-------|----------|-------------|-------------|----------|----------|----------|----------|
| 4055  | OSBPL9   | 2148.316578 | 0.420088052 | 0.079224 | 5.302527 | 1.14E-07 | 5.52E-07 |
| 5353  | AP3M2    | 539.2922759 | 0.419945649 | 0.091445 | 4.592305 | 4.38E-06 | 1.61E-05 |
| 13093 | HSPA2    | 529.0998945 | 0.41964717  | 0.260149 | 1.6131   | 0.106723 | 0.15977  |
| 9394  | SRF      | 1235.897244 | 0.419595309 | 0.146648 | 2.861232 | 0.00422  | 0.008805 |
| 4339  | CUL4A    | 1585.806202 | 0.41930545  | 0.081618 | 5.137383 | 2.79E-07 | 1.26E-06 |
| 6586  | STRAP    | 2352.278985 | 0.419136157 | 0.105071 | 3.989061 | 6.63E-05 | 0.000197 |
| 5591  | ZNF271   | 647.217421  | 0.419029267 | 0.093617 | 4.475987 | 7.61E-06 | 2.67E-05 |
| 6115  | CCDC47   | 2998.028903 | 0.418794941 | 0.09938  | 4.214092 | 2.51E-05 | 8.04E-05 |
| 14532 | PAR1     | 1.671018804 | 0.418687606 | 0.36212  | 1.156213 | 0.247594 | 0.333959 |
| 7733  | SLC25A36 | 1788.966883 | 0.418637279 | 0.118718 | 3.52633  | 0.000421 | 0.001068 |
| 9180  | MAML3    | 354.788715  | 0.41853219  | 0.142047 | 2.946442 | 0.003215 | 0.006864 |
| 9570  | IFIH1    | 789.7389478 | 0.418438955 | 0.149831 | 2.792745 | 0.005226 | 0.010704 |
| 7894  | PARS2    | 131.6623536 | 0.418092649 | 0.12115  | 3.451044 | 0.000558 | 0.001387 |
| 11325 | ARID5B   | 2102.334828 | 0.417949051 | 0.192469 | 2.171513 | 0.029892 | 0.051737 |
| 4591  | UVRAG    | 649.7660685 | 0.417817803 | 0.083718 | 4.990804 | 6.01E-07 | 2.57E-06 |
| 8926  | ZNF275   | 687.6641717 | 0.41751911  | 0.137242 | 3.042206 | 0.002349 | 0.005157 |
| 9768  | RAB6C    | 65.86468434 | 0.417488722 | 0.153181 | 2.725464 | 0.006421 | 0.012885 |
| 4638  | YY1      | 1268.725936 | 0.417131232 | 0.083926 | 4.970238 | 6.69E-07 | 2.83E-06 |
| 7392  | HTT      | 1655.643607 | 0.417018715 | 0.113932 | 3.660236 | 0.000252 | 0.000668 |
| 4578  | NUDT15   | 443.5417239 | 0.416871599 | 0.083418 | 4.997401 | 5.81E-07 | 2.49E-06 |
| 7379  | ERICH1   | 349.6003757 | 0.41680235  | 0.113684 | 3.666315 | 0.000246 | 0.000654 |
| 6914  | SKIV2L2  | 1436.147351 | 0.416781571 | 0.108041 | 3.857615 | 0.000114 | 0.000325 |
| 11303 | LASS6    | 823.8371009 | 0.416708952 | 0.191367 | 2.177543 | 0.02944  | 0.051053 |
| 4285  | USP10    | 1752.495332 | 0.416673731 | 0.080686 | 5.164113 | 2.42E-07 | 1.11E-06 |
| 10716 | HDGFRP3  | 503.1385807 | 0.416668401 | 0.174302 | 2.390493 | 0.016826 | 0.030777 |
| 9102  | SLC25A3  | 8401.73383  | 0.416553892 | 0.139981 | 2.975787 | 0.002922 | 0.006294 |
| 12397 | NKAPL    | 17.08679934 | 0.416445884 | 0.226732 | 1.836735 | 0.066249 | 0.104747 |
| 14507 | PRSS35   | 67.19476676 | 0.416168427 | 0.357468 | 1.164213 | 0.244338 | 0.330135 |
| 9613  | BRP44    | 1991.00512  | 0.416013537 | 0.149912 | 2.775047 | 0.005519 | 0.011254 |
| 10082 | KILLIN   | 43.05275384 | 0.415940532 | 0.158459 | 2.624918 | 0.008667 | 0.01685  |
| 4948  | SIAH1    | 618.478718  | 0.415673256 | 0.086603 | 4.799769 | 1.59E-06 | 6.29E-06 |
| 12451 | FAM22G   | 2.351439938 | 0.41563905  | 0.228399 | 1.819797 | 0.06879  | 0.108293 |
| 10156 | SMAD6    | 151.8284442 | 0.415569924 | 0.160004 | 2.597249 | 0.009397 | 0.018137 |
| 7163  | MFN1     | 692.1198599 | 0.415565148 | 0.110591 | 3.757687 | 0.000171 | 0.000469 |
| 8830  | HACE1    | 269.3459308 | 0.415453097 | 0.134915 | 3.079359 | 0.002074 | 0.004605 |
| 13454 | PAX2     | 1082.198579 | 0.415419708 | 0.276826 | 1.50065  | 0.133446 | 0.194416 |
| 9460  | ARL13B   | 360.1646553 | 0.415379381 | 0.146562 | 2.834146 | 0.004595 | 0.00952  |
| 7906  | TRMT11   | 227.4121014 | 0.415205612 | 0.120501 | 3.445666 | 0.00057  | 0.001412 |
| 3956  | ARMC8    | 729.6346589 | 0.415142355 | 0.077279 | 5.372009 | 7.79E-08 | 3.86E-07 |
| 16050 | POU6F2   | 0.543437696 | 0.415006969 | 0.595058 | 0.697422 | 0.485538 | 0.592962 |
| 3786  | UBE4A    | 1895.813454 | 0.414839212 | 0.075693 | 5.480553 | 4.24E-08 | 2.20E-07 |
| 8712  | GTF2H2C  | 394.1983347 | 0.414797515 | 0.1327   | 3.125836 | 0.001773 | 0.003989 |
| 7933  | ZNF597   | 49.42097676 | 0.414707597 | 0.120738 | 3.434772 | 0.000593 | 0.001465 |
| 5877  | RAB28    | 293.1737332 | 0.414633156 | 0.095666 | 4.334165 | 1.46E-05 | 4.88E-05 |
| 6290  | SYNRG    | 1284.307358 | 0.414550187 | 0.100282 | 4.133858 | 3.57E-05 | 0.000111 |
| 8085  | ARHGEF3  | 762.4484388 | 0.414485786 | 0.122739 | 3.37697  | 0.000733 | 0.001777 |
| 7270  | NUP153   | 1224.595026 | 0.414459967 | 0.11159  | 3.714118 | 0.000204 | 0.00055  |

|       |           |             |             |          |          |          |          |
|-------|-----------|-------------|-------------|----------|----------|----------|----------|
| 10801 | SLC43A2   | 1417.435897 | 0.414337271 | 0.175517 | 2.360661 | 0.018242 | 0.033105 |
| 6498  | PPP1R2    | 1204.711193 | 0.414328729 | 0.102821 | 4.029618 | 5.59E-05 | 0.000168 |
| 4520  | ZNF187    | 336.2678171 | 0.414165129 | 0.082438 | 5.023984 | 5.06E-07 | 2.19E-06 |
| 8511  | ZNF701    | 140.0976023 | 0.414095946 | 0.129369 | 3.200892 | 0.00137  | 0.003155 |
| 5099  | ZNF557    | 155.3231987 | 0.414080529 | 0.087593 | 4.727316 | 2.28E-06 | 8.75E-06 |
| 12464 | SCAMP5    | 821.5503058 | 0.413657183 | 0.228112 | 1.813392 | 0.069771 | 0.109723 |
| 7434  | FAM10A4   | 432.4194587 | 0.413339747 | 0.113464 | 3.642919 | 0.00027  | 0.000711 |
| 7269  | FBXL20    | 145.6294955 | 0.41322541  | 0.111246 | 3.714522 | 0.000204 | 0.000549 |
| 4452  | FAM20B    | 1314.194302 | 0.41314777  | 0.081483 | 5.070325 | 3.97E-07 | 1.75E-06 |
| 13837 | ALG1L     | 5.19699509  | 0.412963122 | 0.300986 | 1.372032 | 0.170053 | 0.240892 |
| 11050 | ACBD4     | 475.8400367 | 0.412707996 | 0.181546 | 2.273293 | 0.023009 | 0.040803 |
| 14736 | TMEM195   | 248.4718053 | 0.412680904 | 0.379105 | 1.088566 | 0.276345 | 0.367603 |
| 11549 | IDH2      | 4149.279209 | 0.412640605 | 0.196766 | 2.097116 | 0.035983 | 0.061066 |
| 4180  | TBC1D22B  | 503.1905161 | 0.41243712  | 0.078919 | 5.226066 | 1.73E-07 | 8.12E-07 |
| 15723 | IQCF1     | 1.07767524  | 0.412408384 | 0.517204 | 0.797381 | 0.42523  | 0.53013  |
| 9011  | C16orf87  | 161.8378318 | 0.412129613 | 0.137012 | 3.007983 | 0.00263  | 0.005721 |
| 10425 | FOXN2     | 613.1860885 | 0.411885631 | 0.164635 | 2.501806 | 0.012356 | 0.023231 |
| 6394  | ABCD4     | 817.9945585 | 0.411874463 | 0.100998 | 4.078048 | 4.54E-05 | 0.000139 |
| 11817 | ME3       | 468.26296   | 0.411740277 | 0.20427  | 2.01567  | 0.043834 | 0.072709 |
| 10457 | GAB2      | 927.1144725 | 0.411672791 | 0.165335 | 2.489929 | 0.012777 | 0.023949 |
| 9627  | C13orf27  | 289.1024716 | 0.411481383 | 0.148573 | 2.769564 | 0.005613 | 0.011429 |
| 9521  | JTF2IRD2I | 158.4475045 | 0.41144352  | 0.146298 | 2.812367 | 0.004918 | 0.010124 |
| 10094 | UTRN      | 3135.159006 | 0.411343806 | 0.157072 | 2.618825 | 0.008823 | 0.017134 |
| 11293 | CPNE8     | 751.9654777 | 0.411301199 | 0.188654 | 2.180191 | 0.029243 | 0.050757 |
| 8423  | TOMM70A   | 2745.78404  | 0.411289232 | 0.126874 | 3.241726 | 0.001188 | 0.002765 |
| 3752  | UBR7      | 1225.451901 | 0.411269495 | 0.07469  | 5.506349 | 3.66E-08 | 1.91E-07 |
| 6938  | CRYZL1    | 385.3701365 | 0.411118942 | 0.106821 | 3.848655 | 0.000119 | 0.000336 |
| 13396 | SH3PXD2E  | 1083.127246 | 0.411091802 | 0.271794 | 1.51251  | 0.130404 | 0.190807 |
| 15512 | ARL13A    | 0.45698919  | 0.411065874 | 0.480287 | 0.855875 | 0.392067 | 0.495417 |
| 16032 | MCART3P   | 0.342433612 | 0.411002087 | 0.585361 | 0.702135 | 0.482595 | 0.590004 |
| 16455 | C1orf157  | 0.253692568 | 0.411001843 | 0.701668 | 0.58575  | 0.558044 | 0.664735 |
| 16638 | TRPV5     | 0.332108622 | 0.411001788 | 0.763067 | 0.538618 | 0.59015  | 0.695274 |
| 17058 | VENTXP7   | 0.270461345 | 0.411001269 | 0.965679 | 0.425608 | 0.670393 | 0.770335 |
| 17247 | FAM138B   | 0.309474709 | 0.411000931 | 1.08904  | 0.377398 | 0.705878 | 0.802175 |
| 17330 | NEUROG2   | 0.236007161 | 0.411000702 | 1.140584 | 0.360342 | 0.718591 | 0.812798 |
| 17409 | PATE2     | 0.163640771 | 0.411000301 | 1.211351 | 0.339291 | 0.734391 | 0.826859 |
| 17626 | LOC144742 | 0.1357169   | 0.41099937  | 1.430118 | 0.287388 | 0.773815 | 0.860505 |
| 17710 | FFAR1     | 0.160381377 | 0.410998887 | 1.550591 | 0.265059 | 0.790964 | 0.87537  |
| 17989 | CYP2A7    | 0.080188807 | 0.410996119 | 1.984348 | 0.207119 | 0.835917 | 0.910824 |
| 18313 | AQP12A    | 0.098906131 | 0.410988967 | 2.91407  | 0.141036 | 0.887841 | 0.950026 |
| 18317 | OR4X2     | 0.077780641 | 0.410988722 | 2.91407  | 0.141036 | 0.887842 | 0.950026 |
| 15739 | C11orf34  | 0.395624195 | 0.410882584 | 0.518284 | 0.792774 | 0.427909 | 0.532909 |
| 6895  | NSL1      | 660.4851002 | 0.410708513 | 0.106244 | 3.865708 | 0.000111 | 0.000315 |
| 8470  | XRN1      | 1214.18466  | 0.410336297 | 0.127455 | 3.219469 | 0.001284 | 0.002972 |
| 9909  | LRRCC1    | 284.1583157 | 0.410064145 | 0.152694 | 2.685532 | 0.007241 | 0.014324 |
| 7033  | GOLPH3L   | 970.0390872 | 0.409964089 | 0.107663 | 3.807829 | 0.00014  | 0.000391 |
| 5311  | LOC144438 | 747.0814867 | 0.409455486 | 0.088733 | 4.614454 | 3.94E-06 | 1.45E-05 |

|       |           |             |             |          |          |          |          |
|-------|-----------|-------------|-------------|----------|----------|----------|----------|
| 13069 | RHBDL3    | 7.890712653 | 0.409365016 | 0.252284 | 1.622635 | 0.104667 | 0.156969 |
| 11400 | E2F5      | 140.5432428 | 0.40915164  | 0.190339 | 2.149594 | 0.031587 | 0.054311 |
| 5016  | NUFIP1    | 186.9392046 | 0.409135456 | 0.085884 | 4.763801 | 1.90E-06 | 7.42E-06 |
| 11392 | ETS1      | 6018.996325 | 0.409135123 | 0.189942 | 2.154005 | 0.03124  | 0.053751 |
| 11193 | RIPK4     | 841.9117201 | 0.409007089 | 0.183901 | 2.224067 | 0.026144 | 0.045783 |
| 14368 | PKD2L2    | 1.012750431 | 0.408990277 | 0.338703 | 1.207519 | 0.227232 | 0.309993 |
| 8313  | RSC1A1    | 167.6993198 | 0.408858825 | 0.124398 | 3.286706 | 0.001014 | 0.00239  |
| 10787 | IL28RA    | 113.0800988 | 0.408505618 | 0.172651 | 2.366075 | 0.017978 | 0.032666 |
| 10298 | HDHD3     | 522.9138539 | 0.408142224 | 0.160225 | 2.547301 | 0.010856 | 0.020663 |
| 6749  | USP22     | 4415.04625  | 0.408124919 | 0.104138 | 3.919092 | 8.89E-05 | 0.000258 |
| 10208 | FAM3C     | 1633.116449 | 0.408052256 | 0.158222 | 2.578986 | 0.009909 | 0.019027 |
| 9118  | NIPA1     | 845.1785149 | 0.407836441 | 0.137306 | 2.970279 | 0.002975 | 0.006396 |
| 14102 | COLEC10   | 6.946999953 | 0.407602204 | 0.316372 | 1.288362 | 0.19762  | 0.274681 |
| 14164 | CD1E      | 18.28444568 | 0.407545991 | 0.321737 | 1.266706 | 0.205261 | 0.284047 |
| 3283  | FAM82A2   | 965.3851252 | 0.407430576 | 0.069925 | 5.826654 | 5.65E-09 | 3.38E-08 |
| 12524 | MAFF      | 904.7384901 | 0.407350405 | 0.226715 | 1.796755 | 0.072375 | 0.113244 |
| 7006  | WARS2     | 430.2048666 | 0.407087892 | 0.106533 | 3.821225 | 0.000133 | 0.000372 |
| 4459  | KLHL12    | 997.9132156 | 0.407073931 | 0.080395 | 5.063405 | 4.12E-07 | 1.81E-06 |
| 5484  | OSBPL2    | 932.462429  | 0.406975906 | 0.089858 | 4.529081 | 5.92E-06 | 2.12E-05 |
| 8836  | NHEJ1     | 464.8125719 | 0.406955511 | 0.132317 | 3.075613 | 0.002101 | 0.00466  |
| 5272  | NUP133    | 924.7012327 | 0.406923995 | 0.087701 | 4.639914 | 3.49E-06 | 1.30E-05 |
| 7406  | RBM41     | 172.2119508 | 0.406903382 | 0.111351 | 3.654237 | 0.000258 | 0.000683 |
| 8680  | MED13L    | 2587.069014 | 0.406822935 | 0.12961  | 3.138827 | 0.001696 | 0.00383  |
| 6011  | COQ7      | 537.098306  | 0.406633077 | 0.095445 | 4.260411 | 2.04E-05 | 6.65E-05 |
| 9071  | ICK       | 556.2065144 | 0.406586621 | 0.135966 | 2.990352 | 0.002787 | 0.006021 |
| 9961  | CMC1      | 155.393254  | 0.40653932  | 0.152402 | 2.667546 | 0.007641 | 0.015035 |
| 7646  | REEP5     | 5945.370238 | 0.406450161 | 0.11409  | 3.562553 | 0.000367 | 0.000942 |
| 12078 | ECT2L     | 6.031112407 | 0.406430204 | 0.210059 | 1.934836 | 0.05301  | 0.086029 |
| 7632  | TOMM20    | 6054.888254 | 0.406303766 | 0.113915 | 3.566743 | 0.000361 | 0.000928 |
| 12952 | TMEM56    | 361.5620785 | 0.406204244 | 0.245325 | 1.655778 | 0.097767 | 0.147956 |
| 10401 | C14orf148 | 6.674279369 | 0.406133155 | 0.161944 | 2.507855 | 0.012147 | 0.022888 |
| 6234  | TCEAL1    | 350.0835105 | 0.405938043 | 0.09754  | 4.161764 | 3.16E-05 | 9.93E-05 |
| 6019  | RALBP1    | 1458.606544 | 0.405893363 | 0.095381 | 4.255496 | 2.09E-05 | 6.79E-05 |
| 6690  | TTLL11    | 55.40625052 | 0.405877132 | 0.102904 | 3.944225 | 8.01E-05 | 0.000235 |
| 11681 | LNP1      | 134.3178863 | 0.40580731  | 0.197405 | 2.055711 | 0.03981  | 0.066803 |
| 10799 | CCDC134   | 79.59692953 | 0.405738647 | 0.171858 | 2.360898 | 0.018231 | 0.03309  |
| 9184  | ZNF641    | 172.858301  | 0.40570752  | 0.137738 | 2.945503 | 0.003224 | 0.006882 |
| 6032  | C22orf30  | 878.2039104 | 0.405661131 | 0.095416 | 4.251517 | 2.12E-05 | 6.90E-05 |
| 5925  | DET1      | 128.1531539 | 0.405427511 | 0.094053 | 4.310632 | 1.63E-05 | 5.39E-05 |
| 7772  | ZER1      | 1303.425832 | 0.405346651 | 0.115512 | 3.509123 | 0.00045  | 0.001134 |
| 16748 | GPR123    | 0.593718695 | 0.405310765 | 0.802384 | 0.505133 | 0.613465 | 0.717969 |
| 5108  | WDR61     | 797.8288947 | 0.40517082  | 0.085749 | 4.725086 | 2.30E-06 | 8.83E-06 |
| 11989 | GPR56     | 8951.807915 | 0.404782698 | 0.206166 | 1.963385 | 0.049601 | 0.081094 |
| 6541  | ARHGEF7   | 1781.537662 | 0.404575392 | 0.10094  | 4.008077 | 6.12E-05 | 0.000183 |
| 5639  | SS18      | 1713.980811 | 0.404212556 | 0.090791 | 4.452103 | 8.50E-06 | 2.96E-05 |
| 7431  | BRD3      | 605.1739953 | 0.404151673 | 0.110904 | 3.64416  | 0.000268 | 0.000708 |
| 8169  | TRIM68    | 296.0978461 | 0.404033389 | 0.120748 | 3.34609  | 0.00082  | 0.001967 |

|       |          |             |             |          |          |          |          |
|-------|----------|-------------|-------------|----------|----------|----------|----------|
| 13615 | RUNX1T1  | 38.27848915 | 0.403925605 | 0.278483 | 1.450451 | 0.146933 | 0.211533 |
| 13316 | N4BP3    | 263.1527341 | 0.403805465 | 0.262497 | 1.538326 | 0.123969 | 0.182481 |
| 8445  | PRMT6    | 368.3721895 | 0.403794182 | 0.125032 | 3.229521 | 0.00124  | 0.002878 |
| 6735  | SKP1     | 6037.881974 | 0.403620678 | 0.102765 | 3.927615 | 8.58E-05 | 0.00025  |
| 8224  | CREBZF   | 1341.749731 | 0.403587095 | 0.121481 | 3.322234 | 0.000893 | 0.002128 |
| 8748  | KATNAL1  | 566.9297339 | 0.403293233 | 0.129703 | 3.109369 | 0.001875 | 0.0042   |
| 8786  | DLG3     | 826.1578422 | 0.402994026 | 0.130393 | 3.090616 | 0.001997 | 0.004456 |
| 10257 | NRIP1    | 1919.346779 | 0.402983743 | 0.15724  | 2.562859 | 0.010381 | 0.019839 |
| 12695 | CDH13    | 1558.551207 | 0.402891702 | 0.232158 | 1.735422 | 0.082666 | 0.127636 |
| 7335  | GPN3     | 446.311526  | 0.402815987 | 0.109251 | 3.687056 | 0.000227 | 0.000606 |
| 9164  | ODC1     | 2324.741152 | 0.402789962 | 0.1364   | 2.953011 | 0.003147 | 0.006731 |
| 12210 | FLT4     | 1406.057672 | 0.402709791 | 0.212762 | 1.892772 | 0.058388 | 0.093732 |
| 10789 | RABGAP1I | 289.5148196 | 0.402557255 | 0.170141 | 2.366027 | 0.01798  | 0.032666 |
| 7180  | STX12    | 1677.906817 | 0.402406462 | 0.10725  | 3.752042 | 0.000175 | 0.000479 |
| 6932  | ZC3H15   | 1367.071971 | 0.402367526 | 0.104495 | 3.850604 | 0.000118 | 0.000333 |
| 9189  | CCDC76   | 261.9750904 | 0.402210913 | 0.136686 | 2.942593 | 0.003255 | 0.006943 |
| 5525  | C17orf71 | 451.2439941 | 0.402174575 | 0.089228 | 4.507274 | 6.57E-06 | 2.33E-05 |
| 13784 | USH1C    | 2584.962254 | 0.40201581  | 0.288746 | 1.392281 | 0.163837 | 0.232979 |
| 12382 | BOK      | 953.8541483 | 0.401867794 | 0.218227 | 1.841513 | 0.065546 | 0.103762 |
| 4335  | ANKRD40  | 1445.171186 | 0.401858254 | 0.078184 | 5.139936 | 2.75E-07 | 1.24E-06 |
| 9554  | ARHGAP31 | 1228.378677 | 0.40174446  | 0.143483 | 2.799945 | 0.005111 | 0.010486 |
| 5963  | ZBTB4    | 2418.429388 | 0.401558759 | 0.093702 | 4.285474 | 1.82E-05 | 5.99E-05 |
| 6754  | PLAA     | 888.2251776 | 0.40151327  | 0.102489 | 3.917613 | 8.94E-05 | 0.00026  |
| 13362 | PCDHGA2  | 43.32270303 | 0.401500544 | 0.26366  | 1.522796 | 0.12781  | 0.187487 |
| 12094 | IKZF2    | 216.085473  | 0.401432699 | 0.207895 | 1.930936 | 0.053491 | 0.086694 |
| 8563  | SPEN     | 1649.976909 | 0.401362101 | 0.125987 | 3.185744 | 0.001444 | 0.003305 |
| 9606  | SWAP70   | 1955.807078 | 0.401304515 | 0.144455 | 2.778065 | 0.005468 | 0.011158 |
| 14054 | LEAP2    | 28.40741253 | 0.401200158 | 0.308557 | 1.300248 | 0.193516 | 0.269886 |
| 15508 | TDRD9    | 71.01856228 | 0.40116349  | 0.468094 | 0.857015 | 0.391437 | 0.494748 |
| 6832  | DPH3     | 558.7399566 | 0.401154045 | 0.103196 | 3.887319 | 0.000101 | 0.000291 |
| 5638  | KIAA0368 | 2321.217851 | 0.401104301 | 0.090093 | 4.452136 | 8.50E-06 | 2.96E-05 |
| 10705 | AKR7A2   | 1350.849604 | 0.400952658 | 0.167354 | 2.395831 | 0.016583 | 0.030363 |
| 13626 | TTC22    | 91.86225993 | 0.400902769 | 0.277058 | 1.446998 | 0.147898 | 0.212751 |
| 7157  | HSF2     | 215.0661268 | 0.400835214 | 0.106541 | 3.762254 | 0.000168 | 0.000461 |
| 11850 | VPS37D   | 145.7804155 | 0.400764954 | 0.199715 | 2.006681 | 0.044784 | 0.074076 |
| 14284 | KLKB1    | 86.53325765 | 0.400669927 | 0.324611 | 1.234308 | 0.217088 | 0.297914 |
| 6264  | ZW10     | 348.5974479 | 0.400506388 | 0.096503 | 4.150196 | 3.32E-05 | 0.000104 |
| 7814  | KIAA0355 | 983.9089209 | 0.400440282 | 0.114532 | 3.496323 | 0.000472 | 0.001183 |
| 6375  | EIF4G2   | 17167.83997 | 0.400263938 | 0.097855 | 4.090389 | 4.31E-05 | 0.000132 |
| 9285  | HIVEP1   | 571.6083296 | 0.400229787 | 0.137745 | 2.905588 | 0.003666 | 0.007738 |
| 7795  | FAM178A  | 803.7681978 | 0.400228373 | 0.114259 | 3.502807 | 0.00046  | 0.001158 |
| 5121  | METT10D  | 702.3291335 | 0.400197519 | 0.084834 | 4.717432 | 2.39E-06 | 9.14E-06 |
| 6424  | GOLGA5   | 1296.879438 | 0.400176371 | 0.09848  | 4.063525 | 4.83E-05 | 0.000147 |
| 10350 | C13orf31 | 386.1694333 | 0.400035366 | 0.158212 | 2.528476 | 0.011456 | 0.021695 |
| 7807  | DCAF17   | 395.7428932 | 0.400030732 | 0.114328 | 3.49897  | 0.000467 | 0.001173 |
| 7391  | FAM116A  | 600.3960008 | 0.399918289 | 0.109239 | 3.660953 | 0.000251 | 0.000666 |
| 9808  | SKAP2    | 2427.809693 | 0.399900642 | 0.147337 | 2.714192 | 0.006644 | 0.013277 |



|       |           |             |             |          |          |          |          |
|-------|-----------|-------------|-------------|----------|----------|----------|----------|
| 13870 | NR4A3     | 401.4096378 | 0.399672887 | 0.293541 | 1.361557 | 0.173338 | 0.24496  |
| 15255 | KIAA1210  | 2.382014158 | 0.39941187  | 0.428653 | 0.931784 | 0.351448 | 0.451572 |
| 7160  | TTC35     | 879.7026905 | 0.399398239 | 0.106217 | 3.760216 | 0.00017  | 0.000465 |
| 6594  | HADHA     | 7389.874757 | 0.399036219 | 0.100132 | 3.985094 | 6.75E-05 | 0.000201 |
| 16300 | LOC643763 | 1.316064994 | 0.398974037 | 0.636579 | 0.626747 | 0.530825 | 0.638325 |
| 9334  | PIGK      | 1143.78247  | 0.398863095 | 0.138275 | 2.88457  | 0.003919 | 0.008231 |
| 15917 | CALB1     | 12.85393549 | 0.398766034 | 0.541708 | 0.736127 | 0.461653 | 0.568463 |
| 4726  | RAB4A     | 674.0993037 | 0.39876552  | 0.081058 | 4.919528 | 8.68E-07 | 3.60E-06 |
| 12174 | GPR89C    | 84.553107   | 0.398762395 | 0.209385 | 1.904447 | 0.056852 | 0.091536 |
| 3107  | PRPF18    | 348.306203  | 0.398746835 | 0.066925 | 5.9581   | 2.55E-09 | 1.61E-08 |
| 7863  | BCL9      | 435.0071852 | 0.398574885 | 0.114995 | 3.466005 | 0.000528 | 0.001317 |
| 9370  | SLC46A1   | 831.9263124 | 0.398428019 | 0.138696 | 2.87267  | 0.00407  | 0.008514 |
| 10758 | TTC32     | 73.37282606 | 0.398418477 | 0.167497 | 2.378656 | 0.017376 | 0.031659 |
| 9215  | CCBL1     | 145.6077492 | 0.39826527  | 0.135776 | 2.933242 | 0.003354 | 0.007135 |
| 11037 | FAM73B    | 333.6438509 | 0.397996887 | 0.174694 | 2.278252 | 0.022712 | 0.040334 |
| 3726  | ANKRD27   | 658.3929805 | 0.397950891 | 0.072052 | 5.523135 | 3.33E-08 | 1.75E-07 |
| 10051 | UHRF1BP1  | 645.2252463 | 0.397864404 | 0.15099  | 2.635046 | 0.008413 | 0.016406 |
| 12541 | MACROD1   | 168.0099065 | 0.397742447 | 0.221739 | 1.793741 | 0.072855 | 0.113868 |
| 7961  | CCNT2     | 821.8844921 | 0.397511759 | 0.116119 | 3.423306 | 0.000619 | 0.001523 |
| 12784 | ROR1      | 78.27833461 | 0.397314861 | 0.232458 | 1.709188 | 0.087416 | 0.13403  |
| 7125  | DDX31     | 229.0126548 | 0.397312843 | 0.105241 | 3.775255 | 0.00016  | 0.00044  |
| 10834 | ZNF92     | 210.8746705 | 0.397057363 | 0.169082 | 2.348306 | 0.018859 | 0.03412  |
| 7090  | HBP1      | 2039.206025 | 0.396837456 | 0.104748 | 3.788485 | 0.000152 | 0.000419 |
| 10450 | C20orf177 | 205.1987852 | 0.396766404 | 0.159067 | 2.494336 | 0.012619 | 0.02367  |
| 7204  | RREB1     | 981.5245036 | 0.396763446 | 0.106028 | 3.74207  | 0.000183 | 0.000497 |
| 7960  | SEC23B    | 2049.077981 | 0.396726145 | 0.115887 | 3.423388 | 0.000618 | 0.001523 |
| 6439  | KIAA0494  | 3934.982774 | 0.396602968 | 0.097833 | 4.053873 | 5.04E-05 | 0.000153 |
| 5993  | ZNF548    | 309.4416415 | 0.396413958 | 0.092772 | 4.27299  | 1.93E-05 | 6.31E-05 |
| 10989 | RASGEF1E  | 225.5386188 | 0.396388137 | 0.173057 | 2.290508 | 0.021992 | 0.039227 |
| 8229  | BRWD1     | 1181.140296 | 0.39623906  | 0.119323 | 3.320715 | 0.000898 | 0.002139 |
| 7559  | UCHL3     | 311.809865  | 0.396106588 | 0.110267 | 3.592263 | 0.000328 | 0.00085  |
| 10188 | KIAA1522  | 1363.463834 | 0.395936755 | 0.153091 | 2.586288 | 0.009702 | 0.018663 |
| 9222  | LRCH3     | 267.8329195 | 0.395836278 | 0.135103 | 2.929887 | 0.003391 | 0.007207 |
| 13492 | TMEM37    | 3059.690717 | 0.395751773 | 0.265523 | 1.490462 | 0.136103 | 0.197729 |
| 7666  | BAT2L1    | 3927.859736 | 0.395646938 | 0.111375 | 3.552383 | 0.000382 | 0.000976 |
| 11866 | NFRSF10I  | 488.7616875 | 0.395570857 | 0.197615 | 2.001723 | 0.045315 | 0.074853 |
| 8422  | ZBTB1     | 902.5481084 | 0.395554899 | 0.122002 | 3.242208 | 0.001186 | 0.00276  |
| 7043  | MIGALT1C  | 610.0875688 | 0.395535614 | 0.104004 | 3.803096 | 0.000143 | 0.000398 |
| 7970  | HSPA1L    | 73.25977252 | 0.394953965 | 0.115437 | 3.42139  | 0.000623 | 0.001532 |
| 8726  | ZNF28     | 406.1970885 | 0.394922827 | 0.126668 | 3.11779  | 0.001822 | 0.004093 |
| 4077  | EXOC1     | 955.3530959 | 0.394863928 | 0.074607 | 5.29256  | 1.21E-07 | 5.80E-07 |
| 10490 | CD58      | 406.2492964 | 0.394795724 | 0.159557 | 2.474331 | 0.013349 | 0.024942 |
| 11183 | NACC2     | 57.14319854 | 0.394779318 | 0.177274 | 2.22695  | 0.025951 | 0.045485 |
| 6534  | YME1L1    | 3106.004445 | 0.394766517 | 0.098425 | 4.010843 | 6.05E-05 | 0.000181 |
| 13878 | GABRR2    | 5.337357689 | 0.394741921 | 0.291132 | 1.355888 | 0.175135 | 0.247357 |
| 9765  | MOBK1B    | 883.7448089 | 0.394669307 | 0.144783 | 2.725939 | 0.006412 | 0.01287  |
| 8793  | IPO11     | 783.7947151 | 0.39463387  | 0.127809 | 3.087682 | 0.002017 | 0.004497 |

|       |           |             |             |          |          |          |          |
|-------|-----------|-------------|-------------|----------|----------|----------|----------|
| 6958  | LZIC      | 277.0773323 | 0.39460059  | 0.102685 | 3.842841 | 0.000122 | 0.000343 |
| 8915  | THSD1P1   | 110.6760044 | 0.39457165  | 0.12954  | 3.045951 | 0.002319 | 0.0051   |
| 10281 | RPH3AL    | 297.7257223 | 0.394466367 | 0.154559 | 2.552208 | 0.010704 | 0.020408 |
| 10337 | NDUFA8    | 1015.172511 | 0.394440171 | 0.155659 | 2.534004 | 0.011277 | 0.021383 |
| 7575  | KIFAP3    | 1118.174446 | 0.394322981 | 0.109906 | 3.58782  | 0.000333 | 0.000863 |
| 8093  | RPE       | 748.0977423 | 0.394293145 | 0.116881 | 3.373468 | 0.000742 | 0.001798 |
| 11435 | NCEH1     | 2242.473452 | 0.394268524 | 0.184392 | 2.138213 | 0.032499 | 0.055705 |
| 10823 | SDR39U1   | 570.5114174 | 0.394222954 | 0.16751  | 2.353425 | 0.018601 | 0.033688 |
| 15549 | FBXL21    | 48.86944918 | 0.394189562 | 0.46573  | 0.846391 | 0.397334 | 0.500865 |
| 11551 | KCNC4     | 265.3930797 | 0.394119461 | 0.187939 | 2.097059 | 0.035988 | 0.061067 |
| 6720  | PIAS1     | 412.805402  | 0.394053675 | 0.100196 | 3.932822 | 8.40E-05 | 0.000245 |
| 12201 | C4orf38   | 36.90397625 | 0.394015633 | 0.207845 | 1.895719 | 0.057997 | 0.093173 |
| 14195 | CAPS      | 191.0789527 | 0.393945159 | 0.312873 | 1.259121 | 0.207987 | 0.287196 |
| 6165  | MRPS22    | 562.4486745 | 0.393911591 | 0.093922 | 4.194051 | 2.74E-05 | 8.71E-05 |
| 7344  | RBM25     | 1518.424072 | 0.393813143 | 0.106904 | 3.683806 | 0.00023  | 0.000613 |
| 5821  | PTCD3     | 991.651781  | 0.393812258 | 0.090285 | 4.361897 | 1.29E-05 | 4.34E-05 |
| 9898  | TMEM68    | 419.1957455 | 0.393774446 | 0.146483 | 2.688185 | 0.007184 | 0.014227 |
| 14667 | BIK       | 10.06161356 | 0.393757087 | 0.354368 | 1.111153 | 0.266502 | 0.35613  |
| 5320  | ATP6V0A2  | 426.1410958 | 0.393637739 | 0.085346 | 4.612268 | 3.98E-06 | 1.47E-05 |
| 5510  | AIMP1     | 1039.050317 | 0.393530271 | 0.087179 | 4.514063 | 6.36E-06 | 2.26E-05 |
| 8216  | ZNF544    | 464.1504725 | 0.393509608 | 0.11833  | 3.325528 | 0.000883 | 0.002105 |
| 11860 | SLC2A8    | 429.8619023 | 0.393412965 | 0.196435 | 2.002763 | 0.045203 | 0.074707 |
| 10538 | ACM3APA   | 14.00529691 | 0.39336597  | 0.160117 | 2.456738 | 0.014021 | 0.026079 |
| 7196  | DUSP16    | 975.223896  | 0.393186821 | 0.104923 | 3.747393 | 0.000179 | 0.000487 |
| 11041 | HPRT1     | 804.7049581 | 0.392898133 | 0.172616 | 2.276138 | 0.022838 | 0.040544 |
| 7873  | C5orf42   | 506.162495  | 0.392897703 | 0.113459 | 3.462901 | 0.000534 | 0.00133  |
| 6105  | UBQLN2    | 1320.887149 | 0.392791782 | 0.093093 | 4.21935  | 2.45E-05 | 7.87E-05 |
| 13389 | PATL2     | 27.18630125 | 0.392559079 | 0.259181 | 1.514612 | 0.129871 | 0.190126 |
| 6750  | RG9MTD3   | 138.7577414 | 0.392482839 | 0.100148 | 3.919032 | 8.89E-05 | 0.000258 |
| 14675 | LASS3     | 1.170840714 | 0.392470083 | 0.353815 | 1.109251 | 0.267322 | 0.357055 |
| 13621 | EMX1      | 155.2003362 | 0.392334504 | 0.270864 | 1.448458 | 0.147489 | 0.212241 |
| 9409  | GLMN      | 108.4555569 | 0.39218369  | 0.13739  | 2.854529 | 0.00431  | 0.008978 |
| 12968 | FBXO15    | 40.79035978 | 0.39210294  | 0.237249 | 1.652707 | 0.09839  | 0.148707 |
| 12193 | PEAR1     | 508.2963347 | 0.392036919 | 0.206479 | 1.898676 | 0.057607 | 0.092607 |
| 15385 | BTNL3     | 1.986587543 | 0.391601057 | 0.438076 | 0.893911 | 0.37137  | 0.473123 |
| 10080 | THAP2     | 176.3927984 | 0.391464035 | 0.149116 | 2.625232 | 0.008659 | 0.016838 |
| 10937 | MEIS1     | 275.5902714 | 0.391188043 | 0.169506 | 2.307806 | 0.02101  | 0.037653 |
| 16330 | LOC93432  | 0.817711448 | 0.391153294 | 0.632058 | 0.618857 | 0.536011 | 0.643377 |
| 10090 | C17orf108 | 318.57876   | 0.390893889 | 0.149156 | 2.6207   | 0.008775 | 0.017046 |
| 7517  | HIAT1     | 1189.337709 | 0.390710578 | 0.108244 | 3.609548 | 0.000307 | 0.0008   |
| 4914  | TUG1      | 3895.146794 | 0.390630356 | 0.08105  | 4.819626 | 1.44E-06 | 5.74E-06 |
| 11448 | DOCK9     | 1716.910193 | 0.39051551  | 0.182885 | 2.135301 | 0.032736 | 0.05605  |
| 12488 | CDON      | 583.9892006 | 0.390279108 | 0.215974 | 1.807067 | 0.070752 | 0.111051 |
| 7304  | SMYD2     | 1319.130274 | 0.390232628 | 0.105514 | 3.698383 | 0.000217 | 0.000582 |
| 13114 | PYROXD2   | 133.7089299 | 0.390180841 | 0.24283  | 1.606807 | 0.108097 | 0.161568 |
| 7288  | TWISTNB   | 546.5853821 | 0.390150443 | 0.10531  | 3.704784 | 0.000212 | 0.000569 |
| 12577 | AKAP2     | 1896.32483  | 0.390111892 | 0.219262 | 1.779205 | 0.075206 | 0.117207 |

|       |          |             |             |          |          |          |          |
|-------|----------|-------------|-------------|----------|----------|----------|----------|
| 9385  | BCAP29   | 1477.685541 | 0.389989216 | 0.136121 | 2.865026 | 0.00417  | 0.008709 |
| 7544  | CLTC     | 10903.86517 | 0.389946243 | 0.108369 | 3.598317 | 0.00032  | 0.000832 |
| 7849  | DNMBP    | 621.142471  | 0.389913097 | 0.1123   | 3.472071 | 0.000516 | 0.00129  |
| 12437 | EIF5A2   | 257.6280585 | 0.389861393 | 0.213613 | 1.825085 | 0.067988 | 0.107144 |
| 10847 | ASB1     | 459.5128694 | 0.389795677 | 0.166574 | 2.34008  | 0.01928  | 0.034836 |
| 13020 | FOX D4   | 17.19969854 | 0.389658651 | 0.237956 | 1.637522 | 0.101522 | 0.152836 |
| 7186  | TRAF3IP1 | 468.8030745 | 0.389487317 | 0.103864 | 3.749961 | 0.000177 | 0.000482 |
| 13050 | MAP6     | 74.85811011 | 0.389430212 | 0.238926 | 1.629923 | 0.103118 | 0.154882 |
| 6308  | AGGF1    | 924.7235269 | 0.389345942 | 0.094463 | 4.121678 | 3.76E-05 | 0.000117 |
| 9672  | RAP2A    | 1418.61076  | 0.389254811 | 0.141242 | 2.755935 | 0.005852 | 0.01186  |
| 11585 | KHDRBS3  | 319.3610993 | 0.389045623 | 0.186394 | 2.087224 | 0.036868 | 0.062378 |
| 8388  | FRYL     | 1544.171829 | 0.388953016 | 0.119497 | 3.254922 | 0.001134 | 0.00265  |
| 6167  | KDM3B    | 2205.170272 | 0.388948179 | 0.092785 | 4.191927 | 2.77E-05 | 8.79E-05 |
| 8301  | TNPO1    | 2739.47779  | 0.388920284 | 0.1181   | 3.293141 | 0.000991 | 0.002339 |
| 8484  | NUP35    | 281.4975765 | 0.388914657 | 0.121043 | 3.213027 | 0.001313 | 0.003035 |
| 9680  | ZBTB3    | 74.16272556 | 0.388744739 | 0.141167 | 2.753797 | 0.005891 | 0.011928 |
| 8954  | TIMM8A   | 122.8286098 | 0.388597291 | 0.128221 | 3.030685 | 0.00244  | 0.005341 |
| 6996  | ZZZ3     | 762.8430151 | 0.388208761 | 0.101477 | 3.825574 | 0.00013  | 0.000366 |
| 9009  | TBC1D23  | 933.6104903 | 0.388079346 | 0.128994 | 3.008513 | 0.002625 | 0.005712 |
| 11343 | NBPF3    | 98.05874176 | 0.387984598 | 0.178956 | 2.168039 | 0.030156 | 0.05211  |
| 4790  | WRNIP1   | 855.7651593 | 0.387711624 | 0.079267 | 4.891226 | 1.00E-06 | 4.10E-06 |
| 7806  | ZNF75A   | 252.2699576 | 0.387267867 | 0.11067  | 3.499313 | 0.000466 | 0.001171 |
| 5069  | ANXA7    | 2994.747074 | 0.387106275 | 0.081704 | 4.737903 | 2.16E-06 | 8.35E-06 |
| 9880  | FAM172A  | 747.1170926 | 0.386955275 | 0.143609 | 2.694508 | 0.007049 | 0.013985 |
| 6712  | ZBTB11   | 637.486203  | 0.386854763 | 0.09829  | 3.935837 | 8.29E-05 | 0.000242 |
| 8233  | CNNM3    | 1102.296613 | 0.386763924 | 0.116549 | 3.318463 | 0.000905 | 0.002155 |
| 9954  | C9orf40  | 100.1153517 | 0.386309452 | 0.144732 | 2.669135 | 0.007605 | 0.014975 |
| 7990  | PPIL4    | 588.7817557 | 0.386111034 | 0.113115 | 3.413447 | 0.000641 | 0.001574 |
| 10635 | MYO5A    | 1136.181618 | 0.386061489 | 0.159467 | 2.420956 | 0.01548  | 0.02853  |
| 6447  | ANGEL2   | 612.479625  | 0.385921321 | 0.095265 | 4.051032 | 5.10E-05 | 0.000155 |
| 6766  | ANKRD42  | 326.3489963 | 0.38573005  | 0.098611 | 3.911619 | 9.17E-05 | 0.000266 |
| 7715  | ZNF655   | 1454.126394 | 0.385674355 | 0.109126 | 3.534196 | 0.000409 | 0.001039 |
| 10942 | TAF4B    | 170.2922302 | 0.385342638 | 0.167112 | 2.305892 | 0.021117 | 0.037827 |
| 8886  | SNTB2    | 1001.372558 | 0.385274859 | 0.126011 | 3.057459 | 0.002232 | 0.004924 |
| 5909  | HMG N4   | 1731.039174 | 0.385273193 | 0.089223 | 4.318116 | 1.57E-05 | 5.22E-05 |
| 6120  | ZNF264   | 738.264981  | 0.385149568 | 0.091452 | 4.211515 | 2.54E-05 | 8.12E-05 |
| 13449 | MAOB     | 4512.506484 | 0.385031411 | 0.256345 | 1.502005 | 0.133096 | 0.193978 |
| 5791  | CDC5L    | 873.869814  | 0.384943346 | 0.087946 | 4.377064 | 1.20E-05 | 4.07E-05 |
| 11814 | HCG11    | 336.0437743 | 0.384797872 | 0.19076  | 2.017183 | 0.043676 | 0.072465 |
| 8263  | ARSD     | 2190.666951 | 0.384704413 | 0.116343 | 3.306653 | 0.000944 | 0.00224  |
| 12252 | ATG4D    | 430.4358031 | 0.384645865 | 0.204406 | 1.881773 | 0.059867 | 0.095776 |
| 8348  | DIP2B    | 1149.823592 | 0.384567024 | 0.117431 | 3.274825 | 0.001057 | 0.002482 |
| 6329  | ARID1B   | 1196.391974 | 0.384564832 | 0.093504 | 4.112823 | 3.91E-05 | 0.000121 |
| 8644  | HYLS1    | 93.64887118 | 0.384510945 | 0.121939 | 3.153318 | 0.001614 | 0.00366  |
| 5847  | MGEA5    | 4173.866942 | 0.384494045 | 0.08843  | 4.347984 | 1.37E-05 | 4.61E-05 |
| 15482 | GLTPD2   | 30.27063441 | 0.384210143 | 0.443582 | 0.866154 | 0.386406 | 0.489209 |
| 9986  | CRNA0017 | 24.53365599 | 0.384001198 | 0.144493 | 2.657574 | 0.007871 | 0.015449 |

|       |           |             |             |          |          |          |          |
|-------|-----------|-------------|-------------|----------|----------|----------|----------|
| 8106  | IFT74     | 298.4058142 | 0.383967918 | 0.113994 | 3.368331 | 0.000756 | 0.001829 |
| 4936  | CSTF2T    | 822.3394563 | 0.383954587 | 0.07989  | 4.806048 | 1.54E-06 | 6.11E-06 |
| 13262 | ITM2A     | 685.7025507 | 0.383954561 | 0.246146 | 1.559867 | 0.118791 | 0.175572 |
| 11843 | C19orf71  | 10.48233116 | 0.383723663 | 0.191075 | 2.008231 | 0.044619 | 0.073847 |
| 5224  | CELF1     | 1730.36393  | 0.383716496 | 0.08222  | 4.666924 | 3.06E-06 | 1.15E-05 |
| 10222 | NRL       | 30.27923807 | 0.383546073 | 0.149031 | 2.573603 | 0.010065 | 0.019299 |
| 14016 | NLGN4X    | 122.1366549 | 0.383544298 | 0.291858 | 1.314148 | 0.188796 | 0.264027 |
| 9620  | RPS6KA3   | 2044.205792 | 0.383491597 | 0.138329 | 2.772309 | 0.005566 | 0.011341 |
| 8895  | TFDP2     | 275.5155988 | 0.383447879 | 0.125548 | 3.054183 | 0.002257 | 0.004973 |
| 7603  | ZMYM5     | 285.4573264 | 0.383320136 | 0.1071   | 3.579095 | 0.000345 | 0.000889 |
| 13965 | CLDN20    | 1.546574714 | 0.383289529 | 0.288114 | 1.330339 | 0.183407 | 0.257426 |
| 7515  | MTHFD1    | 1688.903335 | 0.383147161 | 0.106104 | 3.611061 | 0.000305 | 0.000795 |
| 6927  | MRPL39    | 454.3309975 | 0.383065027 | 0.099435 | 3.852414 | 0.000117 | 0.000331 |
| 10002 | N4BP2L1   | 432.4446457 | 0.383003979 | 0.144415 | 2.652103 | 0.007999 | 0.015677 |
| 5580  | RNF103    | 1041.025593 | 0.382762485 | 0.085398 | 4.482115 | 7.39E-06 | 2.60E-05 |
| 14189 | LRR1Q1    | 38.98042755 | 0.382728332 | 0.303516 | 1.260981 | 0.207316 | 0.286391 |
| 6471  | C6orf35   | 404.9121689 | 0.382627545 | 0.094676 | 4.041461 | 5.31E-05 | 0.000161 |
| 10185 | CLPB      | 380.4899116 | 0.382563671 | 0.147871 | 2.587145 | 0.009677 | 0.018624 |
| 7959  | GTPBP10   | 323.5790596 | 0.382543683 | 0.111732 | 3.423762 | 0.000618 | 0.001521 |
| 13052 | B3GAT2    | 10.99787157 | 0.382484257 | 0.234741 | 1.629392 | 0.10323  | 0.155027 |
| 10965 | SPRY2     | 541.4369584 | 0.382336554 | 0.16636  | 2.298248 | 0.021548 | 0.038519 |
| 8974  | C1orf84   | 17.58527621 | 0.381404506 | 0.126188 | 3.022512 | 0.002507 | 0.005475 |
| 9023  | BMPR1A    | 467.7796033 | 0.381329697 | 0.126932 | 3.004199 | 0.002663 | 0.005785 |
| 10239 | C15orf61  | 96.52527135 | 0.381326612 | 0.148368 | 2.570141 | 0.010166 | 0.019461 |
| 14243 | FIBIN     | 468.5980637 | 0.381141843 | 0.306451 | 1.243727 | 0.2136   | 0.293953 |
| 15351 | C1orf116  | 89.57392628 | 0.381111055 | 0.421097 | 0.905044 | 0.365442 | 0.466616 |
| 10725 | TMEM51    | 1058.815048 | 0.381070495 | 0.15958  | 2.387952 | 0.016943 | 0.030964 |
| 5629  | C6orf64   | 501.9514374 | 0.381067262 | 0.085514 | 4.456181 | 8.34E-06 | 2.91E-05 |
| 9968  | ARSK      | 311.3624239 | 0.381062883 | 0.14303  | 2.664225 | 0.007717 | 0.015174 |
| 13789 | FNFRSF11I | 686.0986518 | 0.381015195 | 0.27425  | 1.389297 | 0.164743 | 0.234188 |
| 8801  | TXNDC9    | 598.6372718 | 0.380998296 | 0.123442 | 3.086466 | 0.002026 | 0.004511 |
| 7794  | C5orf33   | 791.8413888 | 0.380992891 | 0.108767 | 3.502839 | 0.00046  | 0.001158 |
| 10418 | ZNF354B   | 170.5014928 | 0.380985554 | 0.152093 | 2.504958 | 0.012247 | 0.023041 |
| 11431 | ESRP2     | 393.7278335 | 0.380886121 | 0.178032 | 2.139423 | 0.032401 | 0.055559 |
| 9899  | CEP135    | 216.1987591 | 0.380778903 | 0.141663 | 2.687913 | 0.00719  | 0.014237 |
| 9088  | CETN3     | 343.5801369 | 0.380773538 | 0.127661 | 2.982692 | 0.002857 | 0.006162 |
| 14172 | FGFR3     | 563.2251793 | 0.380481588 | 0.300843 | 1.264717 | 0.205973 | 0.284877 |
| 7798  | PRMT5     | 1067.311679 | 0.380380982 | 0.108607 | 3.502361 | 0.000461 | 0.001159 |
| 15592 | SOX21     | 1.047918867 | 0.380359527 | 0.454505 | 0.836866 | 0.402668 | 0.506201 |
| 7654  | C10orf137 | 251.6028468 | 0.380344875 | 0.10691  | 3.557601 | 0.000374 | 0.000958 |
| 10294 | EIF2AK3   | 905.8929356 | 0.380338257 | 0.14927  | 2.547992 | 0.010834 | 0.02063  |
| 8264  | DNAJA3    | 1280.36794  | 0.380090467 | 0.114968 | 3.306064 | 0.000946 | 0.002244 |
| 15192 | C16orf81  | 1.260044005 | 0.380049897 | 0.399705 | 0.950826 | 0.341693 | 0.440858 |
| 15250 | CDR1      | 12.72723463 | 0.379786054 | 0.407292 | 0.932466 | 0.351096 | 0.451267 |
| 10136 | ZSWIM6    | 548.9862501 | 0.379550071 | 0.145819 | 2.602892 | 0.009244 | 0.017876 |
| 6683  | ZNF561    | 720.7745108 | 0.379534205 | 0.096143 | 3.947594 | 7.89E-05 | 0.000232 |
| 8498  | TRUB2     | 617.275443  | 0.379464148 | 0.118308 | 3.207431 | 0.001339 | 0.003089 |

|       |          |             |             |          |          |          |          |
|-------|----------|-------------|-------------|----------|----------|----------|----------|
| 16639 | FSHR     | 0.997528642 | 0.379408118 | 0.70463  | 0.53845  | 0.590266 | 0.695343 |
| 13331 | CNTNAP3  | 91.32451986 | 0.379391747 | 0.247426 | 1.533357 | 0.125188 | 0.184068 |
| 16421 | KRT72    | 0.717239467 | 0.37912139  | 0.634029 | 0.597956 | 0.549869 | 0.656354 |
| 9580  | HINT2    | 474.7825916 | 0.379099106 | 0.135974 | 2.788017 | 0.005303 | 0.01085  |
| 12748 | C11orf52 | 265.828356  | 0.37896885  | 0.220471 | 1.718907 | 0.085631 | 0.131665 |
| 5981  | RBM26    | 701.5992217 | 0.378868243 | 0.088581 | 4.277085 | 1.89E-05 | 6.21E-05 |
| 8376  | MCEE     | 133.8740208 | 0.378868049 | 0.116253 | 3.258994 | 0.001118 | 0.002616 |
| 7784  | TADA2A   | 135.9192351 | 0.378751352 | 0.108024 | 3.506172 | 0.000455 | 0.001145 |
| 8590  | C9orf64  | 560.2706619 | 0.378691493 | 0.119194 | 3.177101 | 0.001488 | 0.003394 |
| 11540 | RHOA     | 924.8763756 | 0.378499402 | 0.180119 | 2.101386 | 0.035607 | 0.06048  |
| 11353 | CTPS     | 557.651218  | 0.378362047 | 0.174738 | 2.165305 | 0.030364 | 0.052424 |
| 8940  | SNX25    | 410.0824189 | 0.378054291 | 0.124552 | 3.03531  | 0.002403 | 0.005268 |
| 8821  | MAGEH1   | 606.4336386 | 0.377925711 | 0.122628 | 3.081889 | 0.002057 | 0.004571 |
| 9760  | ZHX3     | 1382.594585 | 0.377871443 | 0.138533 | 2.72766  | 0.006379 | 0.01281  |
| 7634  | TP53BP1  | 979.27022   | 0.377710454 | 0.105909 | 3.566371 | 0.000362 | 0.000929 |
| 7848  | MSH3     | 514.7552438 | 0.37753203  | 0.108718 | 3.472593 | 0.000515 | 0.001287 |
| 8174  | RAD21    | 3331.40095  | 0.377492602 | 0.112873 | 3.344407 | 0.000825 | 0.001977 |
| 8002  | FYTTD1   | 1691.692138 | 0.377267372 | 0.110663 | 3.409166 | 0.000652 | 0.001596 |
| 6775  | UBE4B    | 941.7141495 | 0.377236137 | 0.096512 | 3.908707 | 9.28E-05 | 0.000268 |
| 10146 | ANP32E   | 1621.590244 | 0.377182796 | 0.145075 | 2.599919 | 0.009325 | 0.018014 |
| 4600  | MTMR1    | 594.017762  | 0.377144726 | 0.075605 | 4.988381 | 6.09E-07 | 2.59E-06 |
| 5797  | PPP2R5C  | 1697.615321 | 0.377139247 | 0.086189 | 4.375711 | 1.21E-05 | 4.09E-05 |
| 6704  | ARID2    | 832.467435  | 0.377058067 | 0.095702 | 3.939937 | 8.15E-05 | 0.000238 |
| 12878 | CYP27A1  | 1506.775355 | 0.376882754 | 0.224132 | 1.681522 | 0.092661 | 0.141036 |
| 14730 | FAM181B  | 5.886400102 | 0.376687043 | 0.345733 | 1.089532 | 0.275919 | 0.367162 |
| 6052  | PSMC6    | 1117.65439  | 0.376681096 | 0.088791 | 4.242329 | 2.21E-05 | 7.17E-05 |
| 5246  | HNRPDL   | 3543.914899 | 0.376583536 | 0.080937 | 4.652799 | 3.27E-06 | 1.22E-05 |
| 12808 | NRIP2    | 492.9803673 | 0.376517128 | 0.221212 | 1.702066 | 0.088743 | 0.13581  |
| 7859  | FAM51L   | 1487.276747 | 0.376333214 | 0.108518 | 3.467924 | 0.000524 | 0.001308 |
| 9464  | SNX12    | 211.1940387 | 0.376194929 | 0.132823 | 2.832307 | 0.004621 | 0.009571 |
| 9507  | IQCK     | 533.4343685 | 0.376085602 | 0.133505 | 2.817011 | 0.004847 | 0.009994 |
| 9633  | EPC1     | 416.6729106 | 0.376029085 | 0.135815 | 2.768678 | 0.005628 | 0.011453 |
| 16709 | NEUROD2  | 0.458400562 | 0.375933718 | 0.727255 | 0.516922 | 0.605211 | 0.709986 |
| 7412  | TCF20    | 969.0623507 | 0.375559116 | 0.102866 | 3.650946 | 0.000261 | 0.000691 |
| 9404  | ING5     | 287.6873684 | 0.375305981 | 0.131365 | 2.85698  | 0.004277 | 0.008914 |
| 8352  | ZNF546   | 105.1226287 | 0.375108055 | 0.114601 | 3.273157 | 0.001064 | 0.002496 |
| 6634  | ZNF318   | 634.0189643 | 0.375016342 | 0.094452 | 3.970425 | 7.17E-05 | 0.000212 |
| 11854 | TRIB2    | 1746.555972 | 0.375005825 | 0.187071 | 2.004621 | 0.045004 | 0.074415 |
| 7380  | CRNA0018 | 225.8689984 | 0.374826244 | 0.102314 | 3.663504 | 0.000249 | 0.000661 |
| 3402  | GGNBP2   | 1325.004022 | 0.374541757 | 0.065162 | 5.747886 | 9.04E-09 | 5.21E-08 |
| 10019 | C12orf23 | 2102.222134 | 0.374307418 | 0.141482 | 2.645624 | 0.008154 | 0.015952 |
| 10243 | KIAA1009 | 205.0176111 | 0.374160839 | 0.145706 | 2.567925 | 0.010231 | 0.019578 |
| 8287  | KLF3     | 1326.3371   | 0.374068407 | 0.113409 | 3.298395 | 0.000972 | 0.0023   |
| 12308 | CETP     | 171.9281325 | 0.374064863 | 0.200894 | 1.862002 | 0.062603 | 0.099698 |
| 9594  | CP110    | 404.3114805 | 0.373987829 | 0.134478 | 2.781025 | 0.005419 | 0.011071 |
| 5937  | DCAF7    | 2591.361015 | 0.373884475 | 0.086961 | 4.299469 | 1.71E-05 | 5.65E-05 |
| 13579 | USHBP1   | 150.0217227 | 0.373781764 | 0.2558   | 1.461228 | 0.143953 | 0.207793 |

|       |           |             |             |          |          |          |          |
|-------|-----------|-------------|-------------|----------|----------|----------|----------|
| 9610  | PNP       | 1474.046243 | 0.373652379 | 0.13463  | 2.775406 | 0.005513 | 0.011245 |
| 10594 | PEPD      | 2147.503655 | 0.373619507 | 0.15324  | 2.438134 | 0.014763 | 0.027315 |
| 10934 | TNS1      | 16397.43524 | 0.37357124  | 0.161837 | 2.308325 | 0.020981 | 0.037612 |
| 14371 | MOV10L1   | 8.633921667 | 0.373516968 | 0.309536 | 1.206698 | 0.227549 | 0.31036  |
| 12555 | SELENBP1  | 947.5276902 | 0.373395054 | 0.208779 | 1.788474 | 0.0737   | 0.115061 |
| 9867  | PTS       | 314.4180373 | 0.37333981  | 0.138379 | 2.697948 | 0.006977 | 0.013861 |
| 7657  | USP32     | 1185.046253 | 0.373266102 | 0.104953 | 3.556497 | 0.000376 | 0.000962 |
| 4621  | SF3B1     | 5885.995732 | 0.373147582 | 0.074932 | 4.979795 | 6.37E-07 | 2.70E-06 |
| 14909 | GRM5      | 38.01424499 | 0.373115567 | 0.360854 | 1.03398  | 0.301145 | 0.395919 |
| 4857  | VTI1A     | 316.7169264 | 0.373079501 | 0.076759 | 4.860376 | 1.17E-06 | 4.73E-06 |
| 11141 | FUT11     | 503.4253278 | 0.372781486 | 0.166433 | 2.239836 | 0.025102 | 0.044163 |
| 10470 | SMC2      | 525.3594165 | 0.372673288 | 0.149936 | 2.485541 | 0.012935 | 0.024217 |
| 11255 | KDM6B     | 1107.558851 | 0.372608305 | 0.169487 | 2.198453 | 0.027917 | 0.048618 |
| 5017  | DCAF8     | 2524.077555 | 0.372485137 | 0.078192 | 4.763741 | 1.90E-06 | 7.42E-06 |
| 5044  | ELAC1     | 122.3301165 | 0.372462667 | 0.078398 | 4.750941 | 2.02E-06 | 7.87E-06 |
| 11649 | RNF138P1  | 17.20872503 | 0.372430853 | 0.180688 | 2.061182 | 0.039286 | 0.066103 |
| 15456 | C1orf92   | 2.187933724 | 0.372193574 | 0.426071 | 0.873549 | 0.382364 | 0.484907 |
| 13199 | GOLGA6L4  | 50.3870374  | 0.372151277 | 0.235707 | 1.578873 | 0.114365 | 0.169837 |
| 11287 | ARAP1     | 3027.555286 | 0.37207398  | 0.170445 | 2.182956 | 0.029039 | 0.050429 |
| 6898  | RBM12     | 1657.745765 | 0.372011341 | 0.09624  | 3.865455 | 0.000111 | 0.000315 |
| 13345 | PCDH17    | 860.9231492 | 0.371865844 | 0.24313  | 1.529492 | 0.126142 | 0.185277 |
| 11033 | TNK1      | 181.1432193 | 0.371672382 | 0.163063 | 2.279311 | 0.022649 | 0.040237 |
| 10664 | PITPNC1   | 554.1758401 | 0.371618121 | 0.154414 | 2.406633 | 0.0161   | 0.029593 |
| 13497 | DNAH6     | 37.464504   | 0.371405525 | 0.249394 | 1.489235 | 0.136426 | 0.198109 |
| 10542 | CENPQ     | 96.42626581 | 0.371294809 | 0.151212 | 2.455464 | 0.01407  | 0.026161 |
| 5699  | NDNL2     | 476.3490547 | 0.37118652  | 0.083965 | 4.420728 | 9.84E-06 | 3.38E-05 |
| 12328 | SLC46A3   | 963.546467  | 0.370795667 | 0.199764 | 1.856167 | 0.06343  | 0.100851 |
| 9214  | SPTAN1    | 6221.002911 | 0.370505609 | 0.126291 | 2.93375  | 0.003349 | 0.007124 |
| 12566 | ZMAT1     | 600.4611942 | 0.370502444 | 0.207763 | 1.78329  | 0.074539 | 0.116269 |
| 9111  | PPP3CA    | 1002.539195 | 0.370483154 | 0.124541 | 2.974787 | 0.002932 | 0.006308 |
| 10554 | ZNF717    | 41.65062595 | 0.370460648 | 0.151111 | 2.451587 | 0.014223 | 0.026415 |
| 8690  | ATRN      | 1919.916914 | 0.370301578 | 0.118121 | 3.134939 | 0.001719 | 0.003877 |
| 12429 | ATP6V0C   | 4786.24887  | 0.37024168  | 0.202649 | 1.827013 | 0.067698 | 0.106762 |
| 9117  | LOC158572 | 38.69691361 | 0.370231256 | 0.12458  | 2.971824 | 0.00296  | 0.006365 |
| 6784  | ZFAND3    | 1837.361249 | 0.370175945 | 0.094799 | 3.904869 | 9.43E-05 | 0.000272 |
| 10842 | CTSO      | 2242.384512 | 0.370148055 | 0.157931 | 2.343732 | 0.019092 | 0.034516 |
| 10216 | SMCHD1    | 993.4146178 | 0.370115526 | 0.143649 | 2.576524 | 0.00998  | 0.019148 |
| 12580 | STARD10   | 767.4444533 | 0.370093267 | 0.208041 | 1.778941 | 0.075249 | 0.117247 |
| 4241  | DDX1      | 2261.166295 | 0.370020894 | 0.071352 | 5.185851 | 2.15E-07 | 9.94E-07 |
| 11578 | SLC25A24  | 1096.830027 | 0.369978215 | 0.17707  | 2.089447 | 0.036668 | 0.062076 |
| 5664  | MTRF1L    | 338.6973866 | 0.3699031   | 0.083293 | 4.440997 | 8.95E-06 | 3.10E-05 |
| 12269 | GIMAP8    | 1037.606014 | 0.369863431 | 0.19694  | 1.878054 | 0.060374 | 0.096465 |
| 6688  | BBS2      | 944.6969722 | 0.369667595 | 0.093678 | 3.946163 | 7.94E-05 | 0.000233 |
| 13753 | COLEC11   | 142.6955978 | 0.369649446 | 0.263634 | 1.40213  | 0.160876 | 0.229284 |
| 9382  | EFCAB2    | 215.3965612 | 0.369629148 | 0.128966 | 2.86609  | 0.004156 | 0.008682 |
| 7481  | HAUS3     | 299.0338394 | 0.36919489  | 0.101911 | 3.622711 | 0.000292 | 0.000764 |
| 9257  | SAMD8     | 109.0042584 | 0.369141735 | 0.12665  | 2.91466  | 0.003561 | 0.00754  |

|       |           |             |             |          |          |          |          |
|-------|-----------|-------------|-------------|----------|----------|----------|----------|
| 8487  | KLHL20    | 456.3598525 | 0.369103803 | 0.114907 | 3.212193 | 0.001317 | 0.003042 |
| 12413 | CSRNP1    | 1252.635709 | 0.369063987 | 0.201436 | 1.832162 | 0.066927 | 0.105683 |
| 7422  | CHD6      | 1086.378525 | 0.369033954 | 0.101149 | 3.648425 | 0.000264 | 0.000697 |
| 10535 | MLLT3     | 406.1426139 | 0.3690164   | 0.150067 | 2.459003 | 0.013932 | 0.025922 |
| 11035 | TMEM144   | 360.6217412 | 0.368966551 | 0.161922 | 2.278674 | 0.022686 | 0.040297 |
| 6231  | GATAD2B   | 789.2048456 | 0.368953842 | 0.088614 | 4.1636   | 3.13E-05 | 9.85E-05 |
| 13341 | KCNIP4    | 197.0387824 | 0.368729873 | 0.240765 | 1.531491 | 0.125648 | 0.184606 |
| 13227 | PLVAP     | 13052.1636  | 0.36869923  | 0.234501 | 1.572273 | 0.115887 | 0.171725 |
| 9348  | FAM18B2   | 241.8484823 | 0.368400652 | 0.12796  | 2.879034 | 0.003989 | 0.008364 |
| 6484  | ARL3      | 649.4135452 | 0.368395551 | 0.091313 | 4.034439 | 5.47E-05 | 0.000165 |
| 14048 | ARHGEF16  | 615.0296489 | 0.368371044 | 0.282899 | 1.302129 | 0.192872 | 0.269112 |
| 16065 | MAGEA12   | 1.00877342  | 0.368300154 | 0.531151 | 0.6934   | 0.488059 | 0.595492 |
| 6871  | POLR1B    | 602.9480246 | 0.368287235 | 0.095039 | 3.875102 | 0.000107 | 0.000304 |
| 8230  | ZNF8      | 84.69908592 | 0.368106942 | 0.110866 | 3.320279 | 0.000899 | 0.002142 |
| 8349  | MLL3      | 1815.493893 | 0.368069107 | 0.112398 | 3.274706 | 0.001058 | 0.002483 |
| 9952  | RASGRP3   | 822.9221143 | 0.368007004 | 0.13779  | 2.670787 | 0.007567 | 0.014904 |
| 14057 | GDF15     | 1776.977584 | 0.367949164 | 0.283032 | 1.300026 | 0.193592 | 0.269943 |
| 5078  | PPFIA1    | 1138.95096  | 0.367923672 | 0.077741 | 4.732696 | 2.22E-06 | 8.55E-06 |
| 10253 | NFIA      | 1586.850742 | 0.367692571 | 0.143374 | 2.564575 | 0.01033  | 0.019749 |
| 13920 | FAM27A    | 27.68761522 | 0.367642229 | 0.27362  | 1.343622 | 0.179071 | 0.252153 |
| 15887 | CDH4      | 144.0239253 | 0.367534035 | 0.49221  | 0.746702 | 0.455243 | 0.561668 |
| 12592 | FZD1      | 3042.451674 | 0.367521596 | 0.206971 | 1.775719 | 0.075779 | 0.11796  |
| 13598 | ANKRD20F  | 9.570409556 | 0.367470519 | 0.252317 | 1.456385 | 0.145286 | 0.209424 |
| 11614 | CTNNAL1   | 561.7294275 | 0.367447509 | 0.17694  | 2.076679 | 0.037831 | 0.063848 |
| 14957 | MAB21L1   | 3.344793414 | 0.367273601 | 0.359742 | 1.020937 | 0.307284 | 0.402693 |
| 10103 | NRAS      | 2056.613961 | 0.367240541 | 0.140403 | 2.61561  | 0.008907 | 0.01728  |
| 9578  | MFAP3     | 1494.456062 | 0.367144554 | 0.131655 | 2.788687 | 0.005292 | 0.01083  |
| 8449  | CNOT6     | 927.0538892 | 0.367088605 | 0.113734 | 3.2276   | 0.001248 | 0.002896 |
| 9098  | C12orf51  | 1055.493905 | 0.366973438 | 0.123289 | 2.97654  | 0.002915 | 0.006281 |
| 11679 | SIRT4     | 27.05000228 | 0.366525056 | 0.178264 | 2.056078 | 0.039775 | 0.066755 |
| 9852  | YEATS4    | 256.1558229 | 0.366508559 | 0.135558 | 2.703711 | 0.006857 | 0.013642 |
| 11567 | DYSF      | 2800.184017 | 0.366454693 | 0.175088 | 2.092979 | 0.036351 | 0.061599 |
| 4467  | SCYL3     | 235.4165623 | 0.36637962  | 0.072433 | 5.058154 | 4.23E-07 | 1.86E-06 |
| 8215  | ZFP62     | 511.9982968 | 0.366294887 | 0.110133 | 3.325934 | 0.000881 | 0.002103 |
| 11888 | ITPK1     | 1844.640702 | 0.366265855 | 0.183847 | 1.992234 | 0.046345 | 0.076415 |
| 7384  | TCEAL8    | 1279.125428 | 0.366244796 | 0.100003 | 3.66234  | 0.00025  | 0.000663 |
| 9711  | URB2      | 225.7729685 | 0.366039531 | 0.133366 | 2.744622 | 0.006058 | 0.012228 |
| 12334 | LOC151009 | 51.76604901 | 0.365865475 | 0.197378 | 1.853631 | 0.063792 | 0.101369 |
| 14581 | C1orf125  | 1.793216149 | 0.365721661 | 0.320196 | 1.142182 | 0.253378 | 0.340612 |
| 10492 | SLC30A6   | 337.009421  | 0.365565979 | 0.147766 | 2.473944 | 0.013363 | 0.024965 |
| 9730  | ZNF37A    | 529.8799934 | 0.365530876 | 0.133487 | 2.73832  | 0.006175 | 0.01244  |
| 7900  | ZUFSP     | 151.0771783 | 0.365363693 | 0.105959 | 3.448165 | 0.000564 | 0.0014   |
| 8481  | DNAJC3    | 3037.071487 | 0.365260663 | 0.113634 | 3.214359 | 0.001307 | 0.003022 |
| 14913 | PLCXD3    | 96.8887439  | 0.365223289 | 0.353887 | 1.032035 | 0.302056 | 0.397009 |
| 8056  | PATL1     | 1422.095615 | 0.365139788 | 0.107672 | 3.39122  | 0.000696 | 0.001693 |
| 8725  | MORC3     | 803.626595  | 0.365025123 | 0.117072 | 3.117949 | 0.001821 | 0.004091 |
| 11226 | LOC650623 | 56.90666351 | 0.364989575 | 0.165082 | 2.210961 | 0.027039 | 0.04721  |

|       |           |             |             |          |          |          |          |
|-------|-----------|-------------|-------------|----------|----------|----------|----------|
| 13976 | C8orf77   | 10.95952313 | 0.364923423 | 0.2754   | 1.325069 | 0.185148 | 0.259666 |
| 8473  | HSPA4     | 2401.031555 | 0.364867028 | 0.113367 | 3.218453 | 0.001289 | 0.002982 |
| 4954  | C13orf23  | 678.1645838 | 0.364759023 | 0.076084 | 4.794147 | 1.63E-06 | 6.46E-06 |
| 13868 | ADAM22    | 133.2147436 | 0.364676805 | 0.267795 | 1.361775 | 0.173269 | 0.244898 |
| 7720  | WAPAL     | 1463.094207 | 0.364529879 | 0.103186 | 3.532751 | 0.000411 | 0.001044 |
| 14147 | PLA2G4A   | 160.9501837 | 0.364509571 | 0.28652  | 1.272197 | 0.203303 | 0.281681 |
| 8322  | C17orf68  | 489.6585019 | 0.36447611  | 0.11103  | 3.282693 | 0.001028 | 0.002422 |
| 14833 | CDO1      | 18.91349988 | 0.364469538 | 0.344898 | 1.056747 | 0.290627 | 0.384048 |
| 11802 | SDC4      | 9299.78406  | 0.364342528 | 0.180331 | 2.020414 | 0.04334  | 0.071981 |
| 7115  | RNMT      | 921.6482994 | 0.364268626 | 0.096383 | 3.779383 | 0.000157 | 0.000433 |
| 14288 | TTBK1     | 45.15851354 | 0.363959298 | 0.295109 | 1.233304 | 0.217462 | 0.298326 |
| 10633 | SNX18     | 904.6991083 | 0.363954077 | 0.150302 | 2.421487 | 0.015457 | 0.028494 |
| 9327  | CNOT7     | 1764.307802 | 0.363885937 | 0.125938 | 2.889398 | 0.00386  | 0.008112 |
| 7266  | ZNF613    | 118.6519507 | 0.363856691 | 0.097896 | 3.716781 | 0.000202 | 0.000544 |
| 14486 | NDRG4     | 142.8013192 | 0.363690908 | 0.310121 | 1.172738 | 0.240901 | 0.325963 |
| 11243 | MGC3771   | 13.4081658  | 0.363600174 | 0.165128 | 2.201933 | 0.02767  | 0.04824  |
| 9791  | C9orf123  | 715.9622282 | 0.363489689 | 0.133674 | 2.719234 | 0.006543 | 0.013099 |
| 8359  | GRK4      | 54.67534215 | 0.363282618 | 0.111194 | 3.267098 | 0.001087 | 0.002548 |
| 9949  | MYO18A    | 1274.150418 | 0.363230573 | 0.135944 | 2.671916 | 0.007542 | 0.014859 |
| 7054  | DTWD1     | 302.3853085 | 0.363157877 | 0.095594 | 3.798954 | 0.000145 | 0.000404 |
| 14529 | C1orf150  | 2.464747126 | 0.363152601 | 0.313974 | 1.156634 | 0.247422 | 0.333796 |
| 5999  | KPNA1     | 1498.202436 | 0.363074278 | 0.085066 | 4.268153 | 1.97E-05 | 6.44E-05 |
| 9755  | OC1001293 | 76.93309253 | 0.363050823 | 0.132949 | 2.730748 | 0.006319 | 0.012697 |
| 11704 | ORC5L     | 400.6511719 | 0.362988501 | 0.177005 | 2.050724 | 0.040294 | 0.067481 |
| 8853  | MRE11A    | 367.6706612 | 0.362952175 | 0.118276 | 3.0687   | 0.00215  | 0.00476  |
| 15502 | NAT2      | 10.61177421 | 0.36286684  | 0.421861 | 0.860156 | 0.389703 | 0.492747 |
| 14482 | CCDC28B   | 160.8383821 | 0.362833293 | 0.309218 | 1.17339  | 0.240639 | 0.325699 |
| 11698 | GYG1      | 1182.8786   | 0.362781416 | 0.17681  | 2.05181  | 0.040188 | 0.067339 |
| 15274 | DNAH12    | 2.374960722 | 0.362605947 | 0.39123  | 0.926835 | 0.354012 | 0.454301 |
| 12755 | ACADS     | 1364.690684 | 0.362591249 | 0.2112   | 1.716818 | 0.086012 | 0.132169 |
| 9306  | ABCB7     | 510.2536239 | 0.362589772 | 0.125114 | 2.898073 | 0.003755 | 0.007908 |
| 15403 | EVPLL     | 10.03272574 | 0.362522992 | 0.407435 | 0.889769 | 0.37359  | 0.47541  |
| 6567  | ESD       | 2455.2519   | 0.362450172 | 0.090673 | 3.997312 | 6.41E-05 | 0.000191 |
| 12699 | ENDOG     | 208.1853445 | 0.36219525  | 0.208782 | 1.7348   | 0.082776 | 0.127766 |
| 7832  | CCDC28A   | 622.1633618 | 0.361886476 | 0.103834 | 3.485236 | 0.000492 | 0.001231 |
| 9166  | TMTC3     | 1146.540765 | 0.361541261 | 0.122469 | 2.952104 | 0.003156 | 0.006749 |
| 16089 | PROM1     | 761.1008738 | 0.361518208 | 0.527696 | 0.685089 | 0.493288 | 0.600966 |
| 10413 | INTS4L2   | 9.907894301 | 0.361497993 | 0.14424  | 2.506224 | 0.012203 | 0.02297  |
| 6496  | ATXN2     | 864.8938966 | 0.361320689 | 0.08965  | 4.030334 | 5.57E-05 | 0.000168 |
| 8731  | OSCP1     | 191.7665474 | 0.361313597 | 0.115958 | 3.115898 | 0.001834 | 0.004117 |
| 13013 | GTF2H2    | 159.3349651 | 0.361300089 | 0.220325 | 1.639848 | 0.101037 | 0.15219  |
| 8510  | EML4      | 2128.312986 | 0.361295798 | 0.112862 | 3.201211 | 0.001369 | 0.003152 |
| 10825 | SLC25A16  | 397.8482127 | 0.361269635 | 0.153536 | 2.353    | 0.018623 | 0.03372  |
| 9846  | ZNF283    | 52.16547547 | 0.361092798 | 0.133457 | 2.705683 | 0.006816 | 0.01357  |
| 8687  | CAPN2     | 5696.948644 | 0.360846465 | 0.115064 | 3.136049 | 0.001712 | 0.003864 |
| 9110  | SMCR7     | 367.5056017 | 0.360771156 | 0.121273 | 2.974865 | 0.002931 | 0.006307 |
| 13520 | ADAM21    | 2.883228064 | 0.360706126 | 0.24349  | 1.481403 | 0.138499 | 0.200793 |



|       |          |             |             |          |          |          |          |
|-------|----------|-------------|-------------|----------|----------|----------|----------|
| 9274  | TNRC6A   | 1456.2574   | 0.360648464 | 0.124032 | 2.907702 | 0.003641 | 0.007695 |
| 11336 | TTC38    | 1469.857659 | 0.36058597  | 0.166197 | 2.169632 | 0.030035 | 0.051933 |
| 8779  | COPB1    | 3624.031064 | 0.360295934 | 0.116491 | 3.092907 | 0.001982 | 0.004425 |
| 7343  | C21orf33 | 2082.083586 | 0.36006736  | 0.097742 | 3.683838 | 0.00023  | 0.000613 |
| 6614  | MRPL30   | 839.9522899 | 0.360005087 | 0.090498 | 3.978042 | 6.95E-05 | 0.000206 |
| 7927  | EPS15    | 1903.299946 | 0.359917777 | 0.10469  | 3.43794  | 0.000586 | 0.001449 |
| 13836 | CNTN4    | 155.3747886 | 0.359917421 | 0.262234 | 1.372503 | 0.169907 | 0.240702 |
| 12496 | HOXC10   | 790.9065834 | 0.359892485 | 0.199312 | 1.805674 | 0.070969 | 0.111326 |
| 8675  | ANKRD49  | 276.772963  | 0.359890017 | 0.11458  | 3.140939 | 0.001684 | 0.003805 |
| 12680 | EPHA2    | 1130.903547 | 0.35975887  | 0.206217 | 1.744561 | 0.081061 | 0.125306 |
| 13713 | C9orf117 | 4.70252053  | 0.359683666 | 0.254282 | 1.414509 | 0.157212 | 0.224715 |
| 13600 | RNASE4   | 1813.735248 | 0.359588387 | 0.24702  | 1.455704 | 0.145474 | 0.209665 |
| 12776 | DNM3     | 105.0661277 | 0.359491756 | 0.210016 | 1.711735 | 0.086945 | 0.133382 |
| 14042 | KCNAB1   | 294.4605751 | 0.359159218 | 0.275139 | 1.305372 | 0.191766 | 0.267683 |
| 8754  | MMADHC   | 1747.440904 | 0.359077985 | 0.115667 | 3.10441  | 0.001907 | 0.004269 |
| 7833  | MLLT10   | 587.0586745 | 0.359029969 | 0.103027 | 3.484822 | 0.000492 | 0.001232 |
| 7447  | DYM      | 608.7121039 | 0.35900739  | 0.098681 | 3.638068 | 0.000275 | 0.000723 |
| 16644 | TRPC7    | 2.52445973  | 0.358845797 | 0.668383 | 0.536887 | 0.591346 | 0.696428 |
| 10297 | FAM107B  | 4077.593943 | 0.358835202 | 0.140869 | 2.547302 | 0.010856 | 0.020663 |
| 8620  | IRGQ     | 654.8324553 | 0.358273012 | 0.113106 | 3.16759  | 0.001537 | 0.003495 |
| 5696  | VAPB     | 1173.994443 | 0.358260183 | 0.081015 | 4.422157 | 9.77E-06 | 3.36E-05 |
| 12626 | SH3RF3   | 385.9384503 | 0.358179049 | 0.202946 | 1.764902 | 0.07758  | 0.120437 |
| 10588 | PRMT3    | 319.811836  | 0.357991629 | 0.146724 | 2.439902 | 0.014691 | 0.027197 |
| 14475 | TMPRSS5  | 5.217315326 | 0.357979307 | 0.30447  | 1.175745 | 0.239697 | 0.32458  |
| 7655  | UBAP2    | 651.0016631 | 0.357851114 | 0.100595 | 3.557343 | 0.000375 | 0.000959 |
| 11771 | PIM3     | 2055.631235 | 0.357764366 | 0.176275 | 2.029584 | 0.042399 | 0.070602 |
| 14120 | CPA6     | 12.85643181 | 0.357763744 | 0.279178 | 1.28149  | 0.200022 | 0.277665 |
| 14217 | HYDIN    | 154.3161373 | 0.35764614  | 0.285713 | 1.251766 | 0.210655 | 0.290431 |
| 10533 | NDUFA9   | 1721.316418 | 0.357593796 | 0.145392 | 2.459519 | 0.013912 | 0.02589  |
| 10040 | C9orf46  | 282.8347273 | 0.357268091 | 0.135454 | 2.637564 | 0.00835  | 0.016302 |
| 6403  | COG2     | 637.8695224 | 0.357231213 | 0.087651 | 4.075594 | 4.59E-05 | 0.000141 |
| 10610 | SLC36A4  | 244.6500603 | 0.357124913 | 0.146765 | 2.433308 | 0.014962 | 0.02764  |
| 4907  | TRA2B    | 2002.125815 | 0.357072982 | 0.074029 | 4.823435 | 1.41E-06 | 5.64E-06 |
| 6804  | ZNF638   | 2123.639011 | 0.357012451 | 0.091578 | 3.898441 | 9.68E-05 | 0.000279 |
| 14867 | HNF4G    | 572.0534239 | 0.356915028 | 0.341026 | 1.046592 | 0.295288 | 0.389314 |
| 9538  | TRIM32   | 374.9954585 | 0.356786973 | 0.127283 | 2.803101 | 0.005061 | 0.010401 |
| 7969  | DDB1     | 5491.120184 | 0.356730402 | 0.104262 | 3.421473 | 0.000623 | 0.001532 |
| 12000 | ZNF681   | 77.56755484 | 0.356567189 | 0.181882 | 1.960434 | 0.049945 | 0.081581 |
| 9076  | VTA1     | 842.7170655 | 0.356056523 | 0.11918  | 2.987549 | 0.002812 | 0.006074 |
| 8670  | PJA1     | 504.6634081 | 0.355897068 | 0.11322  | 3.143412 | 0.00167  | 0.003775 |
| 7574  | NT5C2    | 1112.269349 | 0.35546302  | 0.099073 | 3.587888 | 0.000333 | 0.000863 |
| 10201 | TSC22D2  | 653.3843284 | 0.355398648 | 0.13765  | 2.581904 | 0.009826 | 0.01888  |
| 11186 | CTBS     | 917.8275291 | 0.355360434 | 0.15966  | 2.22573  | 0.026032 | 0.045616 |
| 12943 | ESR1     | 131.911343  | 0.355035999 | 0.213665 | 1.661648 | 0.096583 | 0.146267 |
| 9044  | ADK      | 222.2812708 | 0.35462501  | 0.11829  | 2.997931 | 0.002718 | 0.005891 |
| 7299  | AP3B1    | 1450.089806 | 0.354545269 | 0.095822 | 3.700026 | 0.000216 | 0.000579 |
| 15720 | IL1RAPL1 | 1.124218938 | 0.354448743 | 0.444171 | 0.798001 | 0.42487  | 0.529749 |

|       |            |              |             |          |          |          |          |
|-------|------------|--------------|-------------|----------|----------|----------|----------|
| 10165 | CHORDC1    | 406.4865726  | 0.354446632 | 0.136625 | 2.594294 | 0.009479 | 0.018277 |
| 16667 | C11orf87   | 0.919220285  | 0.354306533 | 0.668671 | 0.529866 | 0.596205 | 0.701193 |
| 12410 | CRYBG3     | 415.8358971  | 0.354280166 | 0.19333  | 1.832512 | 0.066875 | 0.10562  |
| 9850  | EDEM3      | 1306.342316  | 0.354191851 | 0.130991 | 2.703951 | 0.006852 | 0.013635 |
| 8102  | MLH3       | 529.2844201  | 0.35414583  | 0.105069 | 3.370605 | 0.00075  | 0.001815 |
| 5561  | MTMR3      | 1188.112455  | 0.354137941 | 0.078833 | 4.492265 | 7.05E-06 | 2.48E-05 |
| 8783  | PTCD2      | 127.9788494  | 0.353783589 | 0.114426 | 3.091822 | 0.001989 | 0.00444  |
| 7955  | ATXN7      | 644.8500558  | 0.353776817 | 0.103307 | 3.42451  | 0.000616 | 0.001518 |
| 6060  | FBXO38     | 915.0054971  | 0.353659654 | 0.083426 | 4.239214 | 2.24E-05 | 7.26E-05 |
| 14036 | HCG27      | 42.51537926  | 0.353529745 | 0.270362 | 1.307619 | 0.191003 | 0.266732 |
| 10032 | CCDC7      | 47.87940808  | 0.353492008 | 0.133854 | 2.640873 | 0.008269 | 0.016157 |
| 12043 | CPNE2      | 1220.192707  | 0.353416464 | 0.18157  | 1.94645  | 0.051601 | 0.083985 |
| 16563 | SLC28A2    | 0.28452586   | 0.353294209 | 0.635336 | 0.556075 | 0.57816  | 0.684206 |
| 17273 | DDI1       | 0.218755594  | 0.353293519 | 0.945464 | 0.373672 | 0.708648 | 0.804158 |
| 17335 | ARGFX      | 0.278141908  | 0.353293505 | 0.983285 | 0.359299 | 0.719371 | 0.813406 |
| 17347 | LOC286359  | 0.203222441  | 0.353293352 | 0.998634 | 0.353777 | 0.723506 | 0.817476 |
| 17430 | C8orf12    | 0.19330901   | 0.353293131 | 1.065607 | 0.331542 | 0.740235 | 0.832436 |
| 17531 | PRB3       | 0.230406609  | 0.35329295  | 1.148803 | 0.307531 | 0.758439 | 0.847993 |
| 17582 | LOC1001019 | 0.289311771  | 0.353292946 | 1.189309 | 0.297057 | 0.766423 | 0.854434 |
| 17617 | TRIML1     | 0.14644762   | 0.35329256  | 1.218005 | 0.290058 | 0.771772 | 0.858687 |
| 17822 | CAPZA3     | 0.415469087  | 0.353292289 | 1.46222  | 0.241614 | 0.80908  | 0.889842 |
| 17808 | C15orf60   | 0.1111752358 | 0.353291573 | 1.442693 | 0.244883 | 0.806547 | 0.887739 |
| 18013 | PRKACG     | 0.109919534  | 0.353290167 | 1.735724 | 0.20354  | 0.838713 | 0.912703 |
| 18122 | FIGLA      | 0.088225903  | 0.353288772 | 1.965552 | 0.17974  | 0.857356 | 0.927328 |
| 18200 | ZP2        | 0.09418208   | 0.353287359 | 2.186964 | 0.161542 | 0.871666 | 0.938765 |
| 18208 | GIF        | 0.088638198  | 0.353287238 | 2.204842 | 0.160232 | 0.872698 | 0.939474 |
| 18230 | KRTAP5-11  | 0.070089105  | 0.353286676 | 2.265113 | 0.155969 | 0.876058 | 0.941374 |
| 18441 | CYLC1      | 0.090737435  | 0.353281655 | 2.91407  | 0.121233 | 0.903506 | 0.96008  |
| 18439 | BSPH1      | 0.072356485  | 0.35328141  | 2.91407  | 0.121233 | 0.903507 | 0.96008  |
| 18440 | C3orf79    | 0.074239866  | 0.35328141  | 2.91407  | 0.121233 | 0.903507 | 0.96008  |
| 18442 | DEFB129    | 0.054627209  | 0.353281165 | 2.91407  | 0.121233 | 0.903507 | 0.96008  |
| 18444 | GOLGA6D    | 0.05129112   | 0.353281165 | 2.91407  | 0.121233 | 0.903507 | 0.96008  |
| 8177  | SLBP       | 845.2678804  | 0.353231111 | 0.105652 | 3.343343 | 0.000828 | 0.001984 |
| 12600 | GIMAP7     | 710.6201688  | 0.352992364 | 0.199086 | 1.773064 | 0.076218 | 0.118558 |
| 8123  | MTOR       | 1097.225641  | 0.352978231 | 0.105032 | 3.360685 | 0.000777 | 0.001876 |
| 12421 | SLC27A4    | 647.5370911  | 0.352840825 | 0.19283  | 1.829804 | 0.067279 | 0.106171 |
| 8293  | POMT2      | 461.93165    | 0.352818    | 0.107011 | 3.297018 | 0.000977 | 0.00231  |
| 8030  | CALCOCO    | 1910.865179  | 0.352774735 | 0.103769 | 3.399625 | 0.000675 | 0.001647 |
| 12419 | MPZL3      | 22.3473015   | 0.352633829 | 0.192703 | 1.829937 | 0.067259 | 0.106156 |
| 15672 | HIST1H2BI  | 1.642793446  | 0.352581694 | 0.432272 | 0.815648 | 0.414702 | 0.518668 |
| 9031  | MYNN       | 465.6383073  | 0.352565576 | 0.117457 | 3.001655 | 0.002685 | 0.005828 |
| 10616 | TMEM177    | 195.0449146  | 0.352547281 | 0.145101 | 2.429662 | 0.015113 | 0.027904 |
| 10346 | NEURL4     | 443.3685581  | 0.352532538 | 0.139315 | 2.530466 | 0.011391 | 0.021581 |
| 9813  | TIFA       | 277.0057118  | 0.35234787  | 0.129855 | 2.713405 | 0.00666  | 0.013302 |
| 9919  | TXNIP      | 20774.87659  | 0.35232786  | 0.131437 | 2.680586 | 0.007349 | 0.014523 |
| 9418  | PSMD5      | 729.0100327  | 0.352182372 | 0.123502 | 2.851637 | 0.004349 | 0.009052 |
| 11148 | MAPKAPK    | 1181.0469    | 0.352125748 | 0.157367 | 2.237615 | 0.025246 | 0.044389 |

|       |           |             |             |          |          |          |          |
|-------|-----------|-------------|-------------|----------|----------|----------|----------|
| 12482 | ETV3      | 127.2419636 | 0.352125185 | 0.194755 | 1.808043 | 0.0706   | 0.110857 |
| 10739 | PSKH1     | 870.6945682 | 0.351603751 | 0.147471 | 2.38423  | 0.017115 | 0.031238 |
| 13284 | GMCL1L    | 4.19671139  | 0.351582958 | 0.226954 | 1.549135 | 0.121349 | 0.179055 |
| 8538  | PHF20L1   | 851.8933736 | 0.351480324 | 0.110074 | 3.193124 | 0.001407 | 0.003231 |
| 7468  | SRBD1     | 409.980179  | 0.351319251 | 0.096814 | 3.628821 | 0.000285 | 0.000747 |
| 10489 | CRADD     | 277.7734261 | 0.351276431 | 0.14192  | 2.475173 | 0.013317 | 0.024886 |
| 8713  | ZNF160    | 861.81582   | 0.351185235 | 0.112361 | 3.125508 | 0.001775 | 0.003993 |
| 9025  | NCOA3     | 1307.507536 | 0.351087799 | 0.11688  | 3.003821 | 0.002666 | 0.00579  |
| 13771 | C1orf220  | 10.74051262 | 0.351073024 | 0.25155  | 1.395637 | 0.162824 | 0.231756 |
| 13952 | LOC387646 | 40.66880414 | 0.351039564 | 0.263185 | 1.333813 | 0.182265 | 0.256062 |
| 4627  | ATMIN     | 1549.588198 | 0.350827406 | 0.070505 | 4.975935 | 6.49E-07 | 2.75E-06 |
| 14696 | PURG      | 9.946737883 | 0.350606787 | 0.318522 | 1.100732 | 0.271013 | 0.361468 |
| 7839  | PNPT1     | 540.2676235 | 0.350319004 | 0.100678 | 3.479599 | 0.000502 | 0.001256 |
| 8530  | SLC35B4   | 940.3434952 | 0.350257524 | 0.109621 | 3.195166 | 0.001398 | 0.003211 |
| 10100 | SEC62     | 5555.8557   | 0.350170022 | 0.133829 | 2.61655  | 0.008882 | 0.017239 |
| 11181 | CLIP1     | 2178.376164 | 0.349848402 | 0.156941 | 2.229168 | 0.025803 | 0.045234 |
| 9302  | BCAS3     | 630.1136312 | 0.34938813  | 0.120463 | 2.900382 | 0.003727 | 0.007854 |
| 7838  | AHCTF1    | 1279.132005 | 0.349309843 | 0.100383 | 3.479784 | 0.000502 | 0.001255 |
| 8545  | PPP2R2A   | 872.180664  | 0.34918676  | 0.109413 | 3.191467 | 0.001416 | 0.003247 |
| 7578  | PURB      | 1901.160713 | 0.349144837 | 0.097342 | 3.586787 | 0.000335 | 0.000866 |
| 15024 | ALS2CL    | 301.5546621 | 0.349095905 | 0.349345 | 0.999287 | 0.317656 | 0.414428 |
| 9921  | CHD1      | 1035.446124 | 0.34893541  | 0.130212 | 2.679756 | 0.007368 | 0.014556 |
| 14214 | C22orf24  | 1.739238587 | 0.348794608 | 0.278291 | 1.253347 | 0.21008  | 0.289698 |
| 8849  | CEP76     | 80.75836034 | 0.348773532 | 0.113573 | 3.070925 | 0.002134 | 0.004727 |
| 10229 | PDSS1     | 92.15480009 | 0.34873511  | 0.135588 | 2.572027 | 0.01011  | 0.019374 |
| 11731 | AIG1      | 1717.055624 | 0.3485804   | 0.170655 | 2.042598 | 0.041092 | 0.06866  |
| 15449 | RGAG1     | 5.276017673 | 0.348099117 | 0.398027 | 0.874562 | 0.381812 | 0.484446 |
| 15620 | GALNT8    | 0.913092044 | 0.347986828 | 0.419395 | 0.829736 | 0.406688 | 0.510339 |
| 15721 | SCN2B     | 5.560283405 | 0.347927428 | 0.436013 | 0.797974 | 0.424886 | 0.529749 |
| 15998 | NXF5      | 0.802472559 | 0.347912568 | 0.487526 | 0.713628 | 0.475457 | 0.582537 |
| 9273  | HIC2      | 143.6789902 | 0.347642671 | 0.119546 | 2.908022 | 0.003637 | 0.007688 |
| 5766  | C3orf17   | 949.3280117 | 0.347619002 | 0.079207 | 4.388721 | 1.14E-05 | 3.88E-05 |
| 10579 | SASH1     | 1604.300438 | 0.347200601 | 0.142171 | 2.442133 | 0.014601 | 0.027053 |
| 7801  | NIPBL     | 1560.884233 | 0.346562705 | 0.09897  | 3.501679 | 0.000462 | 0.001162 |
| 8994  | AP4E1     | 353.3399175 | 0.346540918 | 0.11496  | 3.014461 | 0.002574 | 0.00561  |
| 8710  | CDS2      | 1109.591462 | 0.346524542 | 0.11083  | 3.126642 | 0.001768 | 0.003979 |
| 8861  | EPS15L1   | 781.8754549 | 0.346422818 | 0.11299  | 3.065956 | 0.00217  | 0.0048   |
| 10127 | SCCPDH    | 1206.946001 | 0.346418161 | 0.132904 | 2.606534 | 0.009146 | 0.017703 |
| 12616 | C20orf160 | 205.880797  | 0.346396764 | 0.196023 | 1.767123 | 0.077208 | 0.119957 |
| 9157  | DCUN1D2   | 186.8082476 | 0.346328432 | 0.117156 | 2.956136 | 0.003115 | 0.006668 |
| 8953  | DNAJC24   | 360.9650644 | 0.345985596 | 0.114153 | 3.030885 | 0.002438 | 0.005338 |
| 12300 | KLF7      | 194.5835123 | 0.345940847 | 0.185393 | 1.865991 | 0.062043 | 0.09887  |
| 10440 | PRPF39    | 484.6857259 | 0.345920725 | 0.1385   | 2.497621 | 0.012503 | 0.023474 |
| 8259  | RPAP3     | 452.6961273 | 0.345603548 | 0.104448 | 3.308845 | 0.000937 | 0.002223 |
| 7857  | ZMYM6     | 475.7503587 | 0.345392402 | 0.099577 | 3.468583 | 0.000523 | 0.001305 |
| 9212  | LRIG2     | 188.5368156 | 0.345133771 | 0.117621 | 2.934283 | 0.003343 | 0.007114 |
| 10422 | MIER1     | 1200.94452  | 0.345099228 | 0.137903 | 2.502478 | 0.012333 | 0.023195 |

|       |           |             |             |          |          |          |          |
|-------|-----------|-------------|-------------|----------|----------|----------|----------|
| 16331 | FABP2     | 1.039184784 | 0.344944802 | 0.55815  | 0.618015 | 0.536565 | 0.644003 |
| 4402  | INTS12    | 333.6223862 | 0.344478176 | 0.067514 | 5.102314 | 3.36E-07 | 1.49E-06 |
| 7315  | STAT5B    | 2161.519083 | 0.344408974 | 0.093207 | 3.69509  | 0.00022  | 0.000589 |
| 14680 | TSHR      | 16.148329   | 0.344370311 | 0.310749 | 1.108195 | 0.267777 | 0.357541 |
| 9038  | LPIN2     | 1504.858769 | 0.344328317 | 0.114798 | 2.999434 | 0.002705 | 0.005866 |
| 6109  | SLC25A17  | 508.6362116 | 0.344013949 | 0.081566 | 4.217621 | 2.47E-05 | 7.92E-05 |
| 14218 | LOC401052 | 29.69647629 | 0.343990337 | 0.274846 | 1.251576 | 0.210724 | 0.290506 |
| 8854  | PHF10     | 1170.76583  | 0.343791113 | 0.112034 | 3.068637 | 0.00215  | 0.004761 |
| 12883 | C6orf201  | 11.00160249 | 0.343680269 | 0.204692 | 1.679009 | 0.09315  | 0.141725 |
| 4511  | KPNA6     | 1718.429124 | 0.343370488 | 0.068278 | 5.029007 | 4.93E-07 | 2.14E-06 |
| 11476 | SLC3A2    | 3969.407418 | 0.343364988 | 0.161375 | 2.127746 | 0.033358 | 0.056976 |
| 6356  | DYNC1I2   | 1964.590068 | 0.343360137 | 0.083793 | 4.097708 | 4.17E-05 | 0.000129 |
| 14772 | SDK2      | 34.17529251 | 0.343265259 | 0.31884  | 1.076605 | 0.281657 | 0.373731 |
| 3959  | GPBP1L1   | 2139.206961 | 0.343245697 | 0.063908 | 5.370908 | 7.83E-08 | 3.88E-07 |
| 5590  | DDX20     | 379.7397828 | 0.343168204 | 0.076633 | 4.478097 | 7.53E-06 | 2.64E-05 |
| 16171 | ANGPTL5   | 1.023408279 | 0.343163492 | 0.518686 | 0.661601 | 0.508227 | 0.616026 |
| 13895 | LOC441666 | 49.43176086 | 0.343072363 | 0.254172 | 1.349766 | 0.177091 | 0.249814 |
| 9962  | ZNF397OS  | 366.8547102 | 0.343047137 | 0.12861  | 2.667342 | 0.007645 | 0.015043 |
| 7607  | RBMXL1    | 501.0382804 | 0.343037695 | 0.095878 | 3.577841 | 0.000346 | 0.000893 |
| 9383  | SMURF2    | 414.5690056 | 0.342989997 | 0.119682 | 2.865853 | 0.004159 | 0.008688 |
| 7032  | TBRG1     | 904.4107532 | 0.342783202 | 0.090018 | 3.807961 | 0.00014  | 0.000391 |
| 15101 | GIPR      | 6.996176146 | 0.342766604 | 0.351048 | 0.97641  | 0.328861 | 0.42686  |
| 11760 | JAK2      | 524.2097435 | 0.342753237 | 0.168504 | 2.034099 | 0.041942 | 0.069906 |
| 14949 | GGT3P     | 271.6968519 | 0.342488445 | 0.334867 | 1.022761 | 0.306421 | 0.401777 |
| 5250  | SFRS1     | 3530.800183 | 0.342460105 | 0.073616 | 4.651959 | 3.29E-06 | 1.23E-05 |
| 10399 | PLCD1     | 230.6819631 | 0.342404326 | 0.13652  | 2.508084 | 0.012139 | 0.022882 |
| 11393 | FICD      | 104.2275895 | 0.342397001 | 0.158975 | 2.153777 | 0.031258 | 0.053777 |
| 7620  | ALG13     | 581.5733715 | 0.342324889 | 0.095856 | 3.571223 | 0.000355 | 0.000914 |
| 11966 | C16orf45  | 264.9464099 | 0.342324042 | 0.17379  | 1.96976  | 0.048866 | 0.080045 |
| 6357  | OAZ2      | 2733.128568 | 0.342242315 | 0.083521 | 4.097676 | 4.17E-05 | 0.000129 |
| 8095  | UBE2G1    | 1033.327362 | 0.342184777 | 0.101435 | 3.373449 | 0.000742 | 0.001798 |
| 12762 | BSG       | 19325.42043 | 0.34207013  | 0.199439 | 1.715162 | 0.086316 | 0.132571 |
| 9317  | MTAP      | 497.9478548 | 0.341993151 | 0.118166 | 2.894178 | 0.003802 | 0.007998 |
| 9018  | ZNF785    | 194.870661  | 0.341836491 | 0.113706 | 3.006312 | 0.002644 | 0.005748 |
| 9820  | SEMA4D    | 1186.630753 | 0.34181505  | 0.126094 | 2.710803 | 0.006712 | 0.013398 |
| 9119  | EIF2C3    | 123.459923  | 0.341804063 | 0.115083 | 2.970075 | 0.002977 | 0.0064   |
| 12660 | SYT15     | 60.82561824 | 0.34163903  | 0.194802 | 1.753773 | 0.079469 | 0.12304  |
| 7630  | RAB2B     | 531.9927622 | 0.34145638  | 0.095722 | 3.567165 | 0.000361 | 0.000927 |
| 15107 | NPM2      | 34.92243625 | 0.341365908 | 0.350658 | 0.973501 | 0.330304 | 0.428563 |
| 14706 | TEX12     | 1.17846433  | 0.341174919 | 0.311031 | 1.096917 | 0.272678 | 0.363441 |
| 10665 | USP1      | 827.0818804 | 0.340888729 | 0.141686 | 2.40594  | 0.016131 | 0.029647 |
| 8354  | TM2D2     | 1159.825213 | 0.340882195 | 0.10422  | 3.270796 | 0.001072 | 0.002516 |
| 8325  | GPATCH2   | 257.8560931 | 0.340866919 | 0.103863 | 3.281895 | 0.001031 | 0.002428 |
| 9433  | UGGT2     | 496.5424909 | 0.340650859 | 0.119738 | 2.844979 | 0.004441 | 0.00923  |
| 13824 | DNAJC22   | 430.3089683 | 0.340515795 | 0.247069 | 1.378219 | 0.168136 | 0.238399 |
| 8311  | PRPF4     | 708.8693729 | 0.340501739 | 0.103545 | 3.288445 | 0.001007 | 0.002376 |
| 8173  | VMA21     | 1450.298334 | 0.340472956 | 0.101793 | 3.344757 | 0.000824 | 0.001975 |

|       |           |             |             |          |          |          |          |
|-------|-----------|-------------|-------------|----------|----------|----------|----------|
| 6959  | INO80     | 740.9408317 | 0.340314887 | 0.08857  | 3.842313 | 0.000122 | 0.000343 |
| 9132  | ZNF250    | 227.2853418 | 0.340271694 | 0.114758 | 2.965133 | 0.003026 | 0.006494 |
| 8430  | CCDC111   | 169.104801  | 0.340263865 | 0.105141 | 3.236265 | 0.001211 | 0.002816 |
| 7509  | EID2      | 248.1706046 | 0.340237522 | 0.094174 | 3.612873 | 0.000303 | 0.00079  |
| 6441  | NGDN      | 394.9881106 | 0.340150369 | 0.083915 | 4.053516 | 5.05E-05 | 0.000154 |
| 16528 | COL20A1   | 0.696729717 | 0.339969674 | 0.601872 | 0.564854 | 0.572173 | 0.678556 |
| 15314 | FAM65C    | 356.6848098 | 0.339886066 | 0.370218 | 0.91807  | 0.358582 | 0.458964 |
| 9138  | ZNF155    | 169.2559913 | 0.339638287 | 0.114616 | 2.963281 | 0.003044 | 0.006529 |
| 8302  | ZNF230    | 124.5429477 | 0.339484784 | 0.103088 | 3.293164 | 0.000991 | 0.002339 |
| 6604  | UNC50     | 661.5597269 | 0.339367858 | 0.085223 | 3.982134 | 6.83E-05 | 0.000203 |
| 8256  | ZNF12     | 950.8511702 | 0.339355708 | 0.10251  | 3.310478 | 0.000931 | 0.002211 |
| 8523  | CTNNB1    | 6623.577149 | 0.339186577 | 0.106133 | 3.195859 | 0.001394 | 0.003206 |
| 15564 | SLC34A3   | 24.62125545 | 0.33916383  | 0.401878 | 0.843947 | 0.398699 | 0.502114 |
| 10473 | APH1B     | 544.2603067 | 0.339158144 | 0.136543 | 2.483885 | 0.012996 | 0.024323 |
| 12203 | PIK3IP1   | 1303.95583  | 0.338868996 | 0.178791 | 1.895331 | 0.058049 | 0.09324  |
| 8676  | HEATR5B   | 838.9545499 | 0.338740706 | 0.107869 | 3.140308 | 0.001688 | 0.003813 |
| 7663  | ASNSD1    | 870.0437504 | 0.338621211 | 0.095292 | 3.553513 | 0.00038  | 0.000972 |
| 8029  | C10orf18  | 1292.63817  | 0.338619714 | 0.099596 | 3.39992  | 0.000674 | 0.001646 |
| 11085 | MRPL15    | 1111.636223 | 0.338567925 | 0.149752 | 2.260857 | 0.023768 | 0.042028 |
| 9091  | PRPF40A   | 1939.750604 | 0.338525686 | 0.113532 | 2.981758 | 0.002866 | 0.006179 |
| 9879  | TMCO3     | 1254.770934 | 0.338490048 | 0.125611 | 2.694759 | 0.007044 | 0.013976 |
| 9588  | COPS2     | 2015.433027 | 0.338330537 | 0.121558 | 2.783289 | 0.005381 | 0.011001 |
| 8728  | SMNDC1    | 638.2745682 | 0.338311863 | 0.108555 | 3.116488 | 0.00183  | 0.00411  |
| 9378  | YAP1      | 2617.644326 | 0.338296993 | 0.117872 | 2.870034 | 0.004104 | 0.008578 |
| 9705  | TNKS2     | 1508.84635  | 0.337781386 | 0.12303  | 2.745529 | 0.006041 | 0.012202 |
| 8565  | SRR       | 177.128335  | 0.337754572 | 0.106045 | 3.184999 | 0.001448 | 0.003313 |
| 7729  | FOXO4     | 374.9665743 | 0.337738596 | 0.095717 | 3.528522 | 0.000418 | 0.00106  |
| 9426  | SMARCA2   | 2229.350045 | 0.337633936 | 0.118544 | 2.848166 | 0.004397 | 0.009144 |
| 6398  | PTK2      | 2602.088999 | 0.337385185 | 0.082763 | 4.076512 | 4.57E-05 | 0.00014  |
| 8664  | PAN3      | 900.8968991 | 0.337223155 | 0.107189 | 3.146049 | 0.001655 | 0.003744 |
| 11120 | C8orf55   | 757.4143301 | 0.337176534 | 0.150167 | 2.24535  | 0.024746 | 0.043619 |
| 9573  | ZFP586I14 | 324.8615793 | 0.33715872  | 0.120827 | 2.790426 | 0.005264 | 0.010778 |
| 10251 | RNF123    | 602.1906434 | 0.337123293 | 0.13145  | 2.564659 | 0.010328 | 0.019748 |
| 7097  | ZC3H7A    | 1196.328026 | 0.337091437 | 0.089076 | 3.784315 | 0.000154 | 0.000426 |
| 9742  | FAM133B   | 105.2988555 | 0.337088873 | 0.123237 | 2.735283 | 0.006233 | 0.01254  |
| 9560  | LOC148189 | 45.12183451 | 0.337066388 | 0.12053  | 2.796546 | 0.005165 | 0.01059  |
| 9527  | ECHS1     | 3022.39658  | 0.337008463 | 0.120038 | 2.807515 | 0.004993 | 0.010272 |
| 11277 | HERC6     | 415.1323107 | 0.336867951 | 0.153989 | 2.187608 | 0.028698 | 0.049881 |
| 5968  | OXSR1     | 1154.889661 | 0.336653259 | 0.07861  | 4.282561 | 1.85E-05 | 6.07E-05 |
| 11494 | MGAT4A    | 1847.999576 | 0.336618331 | 0.158597 | 2.122474 | 0.033798 | 0.057636 |
| 12180 | NIPAL2    | 185.4881506 | 0.336592461 | 0.176908 | 1.902642 | 0.057087 | 0.091869 |
| 12168 | LPP       | 569.3979838 | 0.3364712   | 0.176455 | 1.906837 | 0.056542 | 0.091081 |
| 15550 | OR5K2     | 0.846663141 | 0.336337522 | 0.397391 | 0.846364 | 0.39735  | 0.500865 |
| 11326 | DPY19L3   | 320.3581163 | 0.336226733 | 0.154848 | 2.171331 | 0.029906 | 0.051754 |
| 7313  | ASH2L     | 902.5061649 | 0.336216701 | 0.090984 | 3.695346 | 0.00022  | 0.000589 |
| 6275  | KATNA1    | 250.9429696 | 0.336126169 | 0.081127 | 4.143192 | 3.43E-05 | 0.000107 |
| 15579 | DUSP26    | 7.592065162 | 0.335886949 | 0.399668 | 0.840414 | 0.400676 | 0.504118 |

|       |           |             |             |          |          |          |          |
|-------|-----------|-------------|-------------|----------|----------|----------|----------|
| 13204 | CLEC14A   | 1462.601504 | 0.335832064 | 0.212777 | 1.57833  | 0.11449  | 0.169957 |
| 10507 | ATG4C     | 246.5096424 | 0.33574862  | 0.135961 | 2.469448 | 0.013532 | 0.025244 |
| 10206 | DHDDS     | 844.7321674 | 0.335745415 | 0.130152 | 2.579634 | 0.009891 | 0.018994 |
| 10454 | C14orf1   | 677.7999294 | 0.335565407 | 0.134724 | 2.490754 | 0.012747 | 0.023901 |
| 10259 | C14orf28  | 103.9875809 | 0.335394472 | 0.130898 | 2.562257 | 0.010399 | 0.019869 |
| 10312 | VTI1B     | 1367.98323  | 0.335376199 | 0.131922 | 2.542225 | 0.011015 | 0.020937 |
| 10134 | C10orf58  | 2133.008709 | 0.335188976 | 0.128746 | 2.603489 | 0.009228 | 0.017849 |
| 9504  | RANBP10   | 772.2703354 | 0.335100212 | 0.118862 | 2.819238 | 0.004814 | 0.009928 |
| 5649  | SIN3A     | 1366.573201 | 0.335075727 | 0.075321 | 4.448642 | 8.64E-06 | 3.00E-05 |
| 11241 | OC1002718 | 275.5603792 | 0.335019741 | 0.152072 | 2.203034 | 0.027592 | 0.048113 |
| 11577 | SVIL      | 1602.602768 | 0.335012345 | 0.160327 | 2.089553 | 0.036658 | 0.06207  |
| 10902 | C10orf4   | 403.7618134 | 0.33489045  | 0.144274 | 2.321213 | 0.020275 | 0.036454 |
| 16363 | ANKRD34F  | 1.413242092 | 0.334807421 | 0.549149 | 0.609684 | 0.542071 | 0.649339 |
| 13287 | GPR75     | 17.36271015 | 0.334696473 | 0.216207 | 1.548035 | 0.121614 | 0.179405 |
| 12691 | DIAPH2    | 429.4420763 | 0.334568895 | 0.192659 | 1.736582 | 0.082461 | 0.127359 |
| 10148 | MEM167A   | 2811.221181 | 0.334245419 | 0.128594 | 2.59924  | 0.009343 | 0.018046 |
| 9593  | BTD       | 470.4697566 | 0.33414105  | 0.120126 | 2.781598 | 0.005409 | 0.011052 |
| 9495  | ATP6V1B2  | 3328.577098 | 0.334081247 | 0.118439 | 2.820699 | 0.004792 | 0.009891 |
| 11687 | PRKCH     | 971.6934749 | 0.334039703 | 0.162629 | 2.053998 | 0.039976 | 0.067046 |
| 10680 | MTHFS     | 682.1057227 | 0.334015412 | 0.139034 | 2.402394 | 0.016288 | 0.029894 |
| 9770  | PPP2R3C   | 450.6406124 | 0.333756972 | 0.122467 | 2.725289 | 0.006425 | 0.012889 |
| 7324  | TRAPPC10  | 1102.510496 | 0.333654251 | 0.090408 | 3.690542 | 0.000224 | 0.000599 |
| 8062  | ZNF146    | 1547.284211 | 0.333585599 | 0.098466 | 3.387816 | 0.000705 | 0.001713 |
| 10035 | ACBD3     | 1421.806961 | 0.333250593 | 0.126211 | 2.640418 | 0.00828  | 0.016174 |
| 12444 | C2orf63   | 58.33209048 | 0.33322143  | 0.182842 | 1.822457 | 0.068386 | 0.107717 |
| 12047 | DAB2      | 9365.855523 | 0.333205401 | 0.171282 | 1.945356 | 0.051732 | 0.08417  |
| 7889  | NUP54     | 606.0291983 | 0.333204399 | 0.096475 | 3.453792 | 0.000553 | 0.001373 |
| 9224  | NFS1      | 800.6140787 | 0.33310943  | 0.113729 | 2.928967 | 0.003401 | 0.007227 |
| 8345  | CBWD2     | 493.4874523 | 0.333107315 | 0.101691 | 3.275697 | 0.001054 | 0.002476 |
| 16450 | RNF113B   | 0.854098515 | 0.33302484  | 0.567708 | 0.586613 | 0.557464 | 0.664246 |
| 9026  | RBM12B    | 419.7220428 | 0.332945582 | 0.110844 | 3.00374  | 0.002667 | 0.005791 |
| 17881 | TMEM207   | 0.57211079  | 0.332813108 | 1.444025 | 0.230476 | 0.817722 | 0.89638  |
| 11409 | PXMP4     | 330.5606459 | 0.332644379 | 0.154961 | 2.146635 | 0.031822 | 0.054672 |
| 7590  | TBC1D5    | 1347.764674 | 0.332573361 | 0.092821 | 3.582953 | 0.00034  | 0.000877 |
| 8586  | ZNF140    | 451.2433888 | 0.332470897 | 0.104608 | 3.178254 | 0.001482 | 0.003382 |
| 8780  | PAIP2     | 2357.275711 | 0.332362526 | 0.107461 | 3.092867 | 0.001982 | 0.004425 |
| 11497 | SORT1     | 2428.759342 | 0.332313821 | 0.156771 | 2.119744 | 0.034028 | 0.058013 |
| 9320  | C14orf102 | 227.5352671 | 0.332284715 | 0.114891 | 2.89218  | 0.003826 | 0.008045 |
| 9585  | C10orf28  | 354.2529977 | 0.332279053 | 0.119321 | 2.78474  | 0.005357 | 0.010955 |
| 10190 | HDAC5     | 1194.81317  | 0.332126206 | 0.12844  | 2.58584  | 0.009714 | 0.018686 |
| 9371  | C3orf38   | 388.9714627 | 0.332106548 | 0.115622 | 2.872352 | 0.004074 | 0.008522 |
| 11161 | MORC4     | 541.7908166 | 0.332049556 | 0.148643 | 2.233871 | 0.025492 | 0.044768 |
| 10033 | SEC14L1   | 4071.607599 | 0.33194775  | 0.125709 | 2.640595 | 0.008276 | 0.016169 |
| 7611  | ZNF383    | 106.0247547 | 0.331930022 | 0.092808 | 3.576509 | 0.000348 | 0.000897 |
| 16432 | CNTFR     | 8.929430446 | 0.331903698 | 0.558531 | 0.594244 | 0.552349 | 0.658873 |
| 16333 | CCDC129   | 0.674014261 | 0.331874787 | 0.537666 | 0.617251 | 0.537069 | 0.644529 |
| 9402  | ZNF445    | 443.0965307 | 0.331829899 | 0.116109 | 2.857908 | 0.004264 | 0.00889  |

|       |          |             |             |          |          |          |          |
|-------|----------|-------------|-------------|----------|----------|----------|----------|
| 10516 | GIT2     | 2586.002453 | 0.331797428 | 0.134579 | 2.465442 | 0.013684 | 0.025507 |
| 8972  | C19orf12 | 767.0184629 | 0.331739197 | 0.109731 | 3.02321  | 0.002501 | 0.005464 |
| 11991 | EML2     | 570.8174772 | 0.331726382 | 0.169011 | 1.962752 | 0.049675 | 0.081196 |
| 10089 | PIGP     | 373.8426598 | 0.331598877 | 0.12652  | 2.62092  | 0.008769 | 0.017037 |
| 14279 | CHRM5    | 2.384401882 | 0.331587025 | 0.268534 | 1.234805 | 0.216903 | 0.297746 |
| 6521  | PPP2CA   | 3183.444963 | 0.331391741 | 0.082479 | 4.017889 | 5.87E-05 | 0.000177 |
| 12004 | DST      | 3332.83546  | 0.331173116 | 0.169021 | 1.959359 | 0.050071 | 0.081759 |
| 14832 | C19orf69 | 6.816265932 | 0.331151076 | 0.313303 | 1.056968 | 0.290526 | 0.38394  |
| 12159 | TGFBRAP1 | 298.3567041 | 0.331113298 | 0.173526 | 1.908144 | 0.056373 | 0.090876 |
| 11861 | PEX11A   | 180.5785913 | 0.330921492 | 0.165238 | 2.002692 | 0.04521  | 0.074713 |
| 12378 | DIXDC1   | 1226.834527 | 0.330710881 | 0.17949  | 1.842508 | 0.065401 | 0.103565 |
| 7597  | EFTUD1   | 518.3825326 | 0.330360102 | 0.092254 | 3.580971 | 0.000342 | 0.000883 |
| 10836 | LRRC16A  | 457.9211686 | 0.330148958 | 0.140669 | 2.346989 | 0.018926 | 0.034234 |
| 12086 | DDX21    | 1509.520953 | 0.330088255 | 0.170836 | 1.93219  | 0.053336 | 0.0865   |
| 9872  | MSH2     | 519.1987698 | 0.329942872 | 0.122366 | 2.696369 | 0.00701  | 0.013918 |
| 12206 | CCDC30   | 112.9627271 | 0.329821607 | 0.174068 | 1.894788 | 0.058121 | 0.093333 |
| 7653  | PAIP1    | 1116.173221 | 0.329766839 | 0.092675 | 3.558299 | 0.000373 | 0.000956 |
| 14491 | F2RL3    | 429.2950024 | 0.329195696 | 0.281072 | 1.171213 | 0.241513 | 0.326656 |
| 9115  | C15orf29 | 326.6840153 | 0.329187864 | 0.110722 | 2.973105 | 0.002948 | 0.006339 |
| 9626  | IFNAR1   | 2595.898408 | 0.32913714  | 0.118838 | 2.769622 | 0.005612 | 0.011428 |
| 7758  | SMAD2    | 1611.89113  | 0.328775165 | 0.093525 | 3.515372 | 0.000439 | 0.00111  |
| 8406  | C1orf43  | 5074.426641 | 0.328674671 | 0.101223 | 3.247045 | 0.001166 | 0.002719 |
| 9052  | ALMS1    | 587.8535159 | 0.328583001 | 0.109681 | 2.995798 | 0.002737 | 0.005927 |
| 7984  | CHTF8    | 1784.551317 | 0.32850766  | 0.096121 | 3.417642 | 0.000632 | 0.001551 |
| 9609  | RSBN1L   | 408.2175301 | 0.328388103 | 0.118313 | 2.775599 | 0.00551  | 0.01124  |
| 5570  | YWHAE    | 11139.13039 | 0.328223895 | 0.073124 | 4.488564 | 7.17E-06 | 2.52E-05 |
| 10471 | VAV2     | 1144.796822 | 0.328100622 | 0.132078 | 2.48414  | 0.012986 | 0.02431  |
| 11905 | PTGES2   | 715.2866622 | 0.328045358 | 0.165212 | 1.985602 | 0.047078 | 0.077511 |
| 11114 | ALDH2    | 4193.345019 | 0.327899346 | 0.145929 | 2.246986 | 0.024641 | 0.043455 |
| 14866 | PRPH2    | 17.79577236 | 0.327691057 | 0.31284  | 1.047473 | 0.294882 | 0.388805 |
| 13866 | PKP2     | 405.9478099 | 0.32756677  | 0.240423 | 1.362463 | 0.173052 | 0.244626 |
| 7881  | SEC22C   | 477.2031201 | 0.327540037 | 0.094715 | 3.458152 | 0.000544 | 0.001353 |
| 8369  | CXNRD3IT | 187.4085602 | 0.327501975 | 0.100345 | 3.263752 | 0.001099 | 0.002575 |
| 12612 | PDK1     | 1468.166736 | 0.327443252 | 0.185258 | 1.767498 | 0.077145 | 0.119895 |
| 9298  | ATF6     | 1370.482026 | 0.327284886 | 0.112822 | 2.900909 | 0.003721 | 0.007844 |
| 14614 | EDN1     | 1062.604715 | 0.327108478 | 0.290015 | 1.127902 | 0.259361 | 0.347868 |
| 7712  | ZSCAN29  | 418.7940838 | 0.327072566 | 0.092522 | 3.535089 | 0.000408 | 0.001036 |
| 6842  | EXOC2    | 707.3559661 | 0.327069948 | 0.084226 | 3.883259 | 0.000103 | 0.000295 |
| 8104  | NIPA2    | 993.8968868 | 0.327026334 | 0.097066 | 3.369099 | 0.000754 | 0.001824 |
| 7063  | RNASEL   | 425.1578753 | 0.327010709 | 0.086127 | 3.796827 | 0.000147 | 0.000407 |
| 13872 | PC       | 731.4064644 | 0.326970014 | 0.24022  | 1.36113  | 0.173473 | 0.245115 |
| 7820  | C1orf109 | 273.2834336 | 0.326903091 | 0.093511 | 3.495871 | 0.000473 | 0.001184 |
| 11873 | SLC41A2  | 743.7343633 | 0.32686766  | 0.163513 | 1.999029 | 0.045605 | 0.075289 |
| 8131  | CEPT1    | 768.2739352 | 0.326755715 | 0.097263 | 3.35949  | 0.000781 | 0.001882 |
| 9506  | SCAND2   | 349.6848901 | 0.326536332 | 0.115881 | 2.817857 | 0.004835 | 0.009969 |
| 8852  | RAB6A    | 3807.225458 | 0.326530471 | 0.106398 | 3.06896  | 0.002148 | 0.004756 |
| 5352  | SMG7     | 2244.441508 | 0.326519655 | 0.0711   | 4.592387 | 4.38E-06 | 1.60E-05 |

|       |          |             |             |          |          |          |          |
|-------|----------|-------------|-------------|----------|----------|----------|----------|
| 9655  | RNF219   | 417.0245781 | 0.326499708 | 0.118179 | 2.762757 | 0.005732 | 0.011636 |
| 11628 | AGPHD1   | 27.03300049 | 0.326453885 | 0.157842 | 2.068226 | 0.038619 | 0.065099 |
| 6799  | ASB8     | 878.8251968 | 0.326320328 | 0.083667 | 3.900221 | 9.61E-05 | 0.000277 |
| 8791  | PPP1R12A | 1426.501738 | 0.326203571 | 0.105623 | 3.088378 | 0.002013 | 0.004487 |
| 8042  | MRPL45   | 878.2082657 | 0.326142454 | 0.096046 | 3.395682 | 0.000685 | 0.001669 |
| 12199 | TYMS     | 691.5735047 | 0.325877014 | 0.171807 | 1.896757 | 0.05786  | 0.092968 |
| 11147 | ZNF350   | 261.2901319 | 0.32570111  | 0.145553 | 2.237686 | 0.025242 | 0.044385 |
| 10345 | UBE2B    | 1607.533067 | 0.325690846 | 0.128703 | 2.53056  | 0.011388 | 0.021577 |
| 11867 | ZEB1     | 1156.524451 | 0.325577987 | 0.162668 | 2.001492 | 0.045339 | 0.074888 |
| 14959 | TRIM55   | 380.6432241 | 0.325502496 | 0.319454 | 1.018934 | 0.308234 | 0.403884 |
| 14072 | CCDC48   | 44.66205901 | 0.325031004 | 0.250778 | 1.296089 | 0.194945 | 0.27154  |
| 9631  | ZC3H8    | 92.08522315 | 0.324962595 | 0.117359 | 2.768961 | 0.005624 | 0.011445 |
| 6821  | DYNC1LI2 | 2943.64636  | 0.324924525 | 0.083513 | 3.890729 | 9.99E-05 | 0.000287 |
| 13314 | CRNA0009 | 59.14043382 | 0.324917034 | 0.211143 | 1.53885  | 0.123841 | 0.18232  |
| 14757 | CLDN7    | 680.0797715 | 0.324702033 | 0.300113 | 1.081932 | 0.279283 | 0.370932 |
| 8633  | TCEANC   | 49.15877881 | 0.324485604 | 0.102682 | 3.160108 | 0.001577 | 0.003581 |
| 11871 | C5orf15  | 3952.601507 | 0.324132186 | 0.162117 | 1.999378 | 0.045567 | 0.075239 |
| 7937  | SNX5     | 2961.499387 | 0.324126314 | 0.094413 | 3.433067 | 0.000597 | 0.001474 |
| 13286 | PPIF     | 1686.242694 | 0.324022165 | 0.209306 | 1.548081 | 0.121603 | 0.179402 |
| 9648  | GTF2IP1  | 5973.933167 | 0.323997033 | 0.117241 | 2.763519 | 0.005718 | 0.011615 |
| 9908  | TMEM55B  | 482.0806582 | 0.323988881 | 0.120635 | 2.685699 | 0.007238 | 0.014319 |
| 13178 | ABCC5    | 953.6661248 | 0.323902111 | 0.204169 | 1.586439 | 0.11264  | 0.167537 |
| 9969  | CEP192   | 409.5081117 | 0.323896165 | 0.12162  | 2.663186 | 0.00774  | 0.015219 |
| 9941  | DIAPH1   | 5423.541435 | 0.323767061 | 0.12109  | 2.67377  | 0.0075   | 0.014789 |
| 7827  | TEX10    | 389.4211534 | 0.323663459 | 0.0927   | 3.49151  | 0.00048  | 0.001203 |
| 9809  | FEZ2     | 1035.528682 | 0.323260737 | 0.11911  | 2.71396  | 0.006648 | 0.013285 |
| 7161  | C19orf2  | 1249.272319 | 0.323242872 | 0.085968 | 3.760026 | 0.00017  | 0.000465 |
| 10411 | IFT81    | 314.731614  | 0.323232955 | 0.128961 | 2.506438 | 0.012195 | 0.022961 |
| 13308 | CATSPER3 | 18.65416152 | 0.323089363 | 0.20979  | 1.540061 | 0.123545 | 0.181967 |
| 12195 | C8orf83  | 1130.807875 | 0.323028465 | 0.170189 | 1.898058 | 0.057688 | 0.092722 |
| 12919 | C11orf63 | 108.3645911 | 0.322998874 | 0.193682 | 1.66768  | 0.095379 | 0.144711 |
| 11741 | HSPA13   | 1537.873825 | 0.322898749 | 0.158272 | 2.040157 | 0.041335 | 0.069006 |
| 7493  | CLUAP1   | 483.1333216 | 0.322489083 | 0.0891   | 3.619392 | 0.000295 | 0.000772 |
| 14767 | RGL4     | 21.66159239 | 0.322370561 | 0.298806 | 1.078863 | 0.280649 | 0.372519 |
| 6979  | RNF121   | 647.4562863 | 0.322331845 | 0.084068 | 3.834194 | 0.000126 | 0.000354 |
| 9233  | AZI2     | 804.8275707 | 0.32230407  | 0.110155 | 2.925927 | 0.003434 | 0.007291 |
| 12029 | RASA2    | 119.2275693 | 0.322181488 | 0.164938 | 1.953351 | 0.050778 | 0.082742 |
| 14422 | SERINC5  | 118.0358858 | 0.322152927 | 0.270357 | 1.191581 | 0.233425 | 0.317249 |
| 10691 | ANKS6    | 512.8968091 | 0.32210177  | 0.134216 | 2.399869 | 0.016401 | 0.03007  |
| 12450 | RFX3     | 58.07683948 | 0.322008054 | 0.176901 | 1.820276 | 0.068717 | 0.108187 |
| 7397  | LSM14A   | 3090.479386 | 0.321735621 | 0.087949 | 3.658193 | 0.000254 | 0.000673 |
| 9483  | NFKB1    | 1426.895042 | 0.321718508 | 0.113885 | 2.824938 | 0.004729 | 0.009775 |
| 7022  | DAZAP2   | 7380.098977 | 0.321699335 | 0.084356 | 3.813597 | 0.000137 | 0.000382 |
| 7688  | PUM2     | 2978.730067 | 0.32168902  | 0.09077  | 3.544013 | 0.000394 | 0.001005 |
| 10556 | VANGL1   | 736.3828873 | 0.321471522 | 0.131197 | 2.450291 | 0.014274 | 0.026505 |
| 12215 | WWTR1    | 1293.372462 | 0.321299294 | 0.169875 | 1.891382 | 0.058573 | 0.093991 |
| 8705  | RWDD2A   | 138.3258209 | 0.321092129 | 0.10266  | 3.12771  | 0.001762 | 0.003967 |



|       |          |             |             |          |          |          |          |
|-------|----------|-------------|-------------|----------|----------|----------|----------|
| 9933  | PRRC1    | 2049.63614  | 0.320427931 | 0.11971  | 2.676709 | 0.007435 | 0.014672 |
| 11247 | DARS     | 4185.062847 | 0.320005813 | 0.145377 | 2.201214 | 0.027721 | 0.048311 |
| 9230  | STX18    | 512.3822918 | 0.319955213 | 0.109271 | 2.92809  | 0.003411 | 0.007243 |
| 8480  | SUMO1    | 2013.299432 | 0.319942419 | 0.099491 | 3.215784 | 0.001301 | 0.003007 |
| 9557  | CAND1    | 2478.503618 | 0.319890441 | 0.114338 | 2.797752 | 0.005146 | 0.010554 |
| 13134 | HOXB3    | 353.0458203 | 0.319831589 | 0.200133 | 1.598093 | 0.110022 | 0.164196 |
| 7096  | SNIP1    | 258.9607191 | 0.319773687 | 0.084494 | 3.784559 | 0.000154 | 0.000425 |
| 6094  | HP1BP3   | 3389.970088 | 0.319693734 | 0.075692 | 4.223602 | 2.40E-05 | 7.73E-05 |
| 14035 | MALAT1   | 6824.786127 | 0.3196705   | 0.244456 | 1.307679 | 0.190982 | 0.266722 |
| 13261 | FOXRED2  | 390.3483319 | 0.319634462 | 0.20481  | 1.560641 | 0.118609 | 0.175314 |
| 9045  | IFT57    | 886.7206903 | 0.319420536 | 0.106559 | 2.997591 | 0.002721 | 0.005897 |
| 13885 | SFRS13B  | 55.95005137 | 0.318988933 | 0.235751 | 1.353076 | 0.176031 | 0.248498 |
| 11194 | B2M      | 86813.30164 | 0.318970656 | 0.143451 | 2.223549 | 0.026179 | 0.04584  |
| 6316  | PUM1     | 2053.029783 | 0.31893682  | 0.077446 | 4.118199 | 3.82E-05 | 0.000119 |
| 12724 | SLC38A1  | 7986.49118  | 0.31893063  | 0.184911 | 1.724775 | 0.084568 | 0.130275 |
| 13273 | RAPGEF5  | 1393.327294 | 0.318890356 | 0.205241 | 1.553739 | 0.120247 | 0.177575 |
| 11214 | ZNF514   | 259.2075291 | 0.318849308 | 0.143907 | 2.215666 | 0.026714 | 0.046694 |
| 11395 | RTN4IP1  | 181.802796  | 0.318526773 | 0.148084 | 2.150993 | 0.031477 | 0.054144 |
| 10111 | MRPS18B  | 1461.336726 | 0.31846664  | 0.121852 | 2.613545 | 0.008961 | 0.017371 |
| 6997  | ZNF227   | 289.1817645 | 0.318427341 | 0.083244 | 3.825249 | 0.000131 | 0.000366 |
| 15293 | IGF1     | 302.9255161 | 0.318131272 | 0.344766 | 0.922747 | 0.356139 | 0.456463 |
| 7596  | DBR1     | 347.6723527 | 0.317960403 | 0.088784 | 3.581275 | 0.000342 | 0.000882 |
| 10036 | ZBTB24   | 318.0569917 | 0.317914628 | 0.120412 | 2.64022  | 0.008285 | 0.016182 |
| 7771  | CHD2     | 1950.631088 | 0.317693901 | 0.090529 | 3.509321 | 0.000449 | 0.001133 |
| 11482 | ANKRD5   | 177.6753201 | 0.317682817 | 0.149388 | 2.126567 | 0.033456 | 0.057113 |
| 9453  | ARMC2    | 44.88313796 | 0.317682601 | 0.112003 | 2.836378 | 0.004563 | 0.009461 |
| 11452 | ASPRV1   | 79.27192575 | 0.317577265 | 0.148822 | 2.133943 | 0.032847 | 0.056221 |
| 8519  | TIRAP    | 148.0825106 | 0.317133798 | 0.099162 | 3.198139 | 0.001383 | 0.003182 |
| 10313 | ORC3L    | 537.6359766 | 0.317101225 | 0.124749 | 2.541921 | 0.011025 | 0.020953 |
| 8297  | PIGV     | 391.0856499 | 0.316560269 | 0.096074 | 3.294958 | 0.000984 | 0.002325 |
| 10249 | EPB41L1  | 2253.203454 | 0.31633046  | 0.123298 | 2.565586 | 0.0103   | 0.019699 |
| 13659 | RAET1G   | 9.555532697 | 0.316327302 | 0.22027  | 1.43609  | 0.150977 | 0.21666  |
| 9410  | POLR2A   | 4624.475039 | 0.316268553 | 0.110796 | 2.854515 | 0.00431  | 0.008978 |
| 11365 | MDM4     | 804.8754718 | 0.316242394 | 0.146234 | 2.162582 | 0.030573 | 0.052725 |
| 7005  | HCG18    | 356.0178027 | 0.316162145 | 0.082724 | 3.821875 | 0.000132 | 0.000371 |
| 13486 | MAP1LC3A | 352.169351  | 0.315522936 | 0.211567 | 1.491361 | 0.135867 | 0.197473 |
| 14993 | CELF4    | 31.10373387 | 0.31550535  | 0.312861 | 1.008454 | 0.313237 | 0.409508 |
| 6702  | HAUS2    | 462.0919613 | 0.315479407 | 0.080065 | 3.940278 | 8.14E-05 | 0.000238 |
| 11023 | CYB5RL   | 75.6617073  | 0.315265057 | 0.138134 | 2.282311 | 0.022471 | 0.039958 |
| 8847  | ANAPC10  | 126.5065117 | 0.315061579 | 0.102518 | 3.073225 | 0.002118 | 0.004692 |
| 13141 | SNTA1    | 1105.495195 | 0.315060445 | 0.197312 | 1.596765 | 0.110318 | 0.16455  |
| 8250  | PITPNB   | 1345.914292 | 0.314903187 | 0.095046 | 3.313164 | 0.000922 | 0.002192 |
| 9699  | ZNF799   | 157.8621017 | 0.314883527 | 0.114632 | 2.746909 | 0.006016 | 0.01216  |
| 11294 | C1GALT1  | 615.7965439 | 0.314872563 | 0.144456 | 2.17971  | 0.029279 | 0.050814 |
| 9706  | AMN1     | 198.6543706 | 0.314777621 | 0.114658 | 2.745354 | 0.006045 | 0.012204 |
| 8672  | UXS1     | 1122.882063 | 0.314718337 | 0.10014  | 3.142771 | 0.001674 | 0.003783 |
| 8570  | C15orf40 | 215.7841819 | 0.314410394 | 0.098763 | 3.183482 | 0.001455 | 0.003328 |

|       |           |             |             |          |          |          |          |
|-------|-----------|-------------|-------------|----------|----------|----------|----------|
| 9651  | ZRANB2    | 1193.894845 | 0.31405988  | 0.113647 | 2.763466 | 0.005719 | 0.011615 |
| 11751 | DDX58     | 877.3889344 | 0.313980829 | 0.154173 | 2.036548 | 0.041695 | 0.069549 |
| 9664  | UBLCP1    | 624.0117564 | 0.313913897 | 0.113763 | 2.759357 | 0.005792 | 0.011747 |
| 16291 | ART5      | 39.68507076 | 0.313890975 | 0.498905 | 0.62916  | 0.529244 | 0.636776 |
| 17203 | IGFN1     | 52.7897616  | 0.313857331 | 0.811675 | 0.386678 | 0.698994 | 0.79643  |
| 8769  | FAM118B   | 270.4972091 | 0.313764059 | 0.101342 | 3.096091 | 0.001961 | 0.004383 |
| 11040 | FRG1B     | 319.5257058 | 0.313757337 | 0.137837 | 2.276289 | 0.022829 | 0.040531 |
| 6713  | NOL11     | 836.8196048 | 0.31372042  | 0.079712 | 3.935696 | 8.30E-05 | 0.000242 |
| 12336 | IMPAD1    | 3457.047487 | 0.313548533 | 0.169163 | 1.853532 | 0.063806 | 0.101383 |
| 7872  | USP24     | 1482.286364 | 0.313503896 | 0.090517 | 3.463492 | 0.000533 | 0.001328 |
| 11816 | ZNF879    | 78.16228677 | 0.313476594 | 0.155492 | 2.016035 | 0.043796 | 0.072652 |
| 8082  | C22orf39  | 512.3699634 | 0.313363097 | 0.092755 | 3.378387 | 0.000729 | 0.001768 |
| 14392 | DC1001288 | 36.02924377 | 0.313246465 | 0.261005 | 1.200155 | 0.230079 | 0.313354 |
| 8694  | C6orf130  | 357.9469232 | 0.313172293 | 0.099958 | 3.133028 | 0.00173  | 0.003901 |
| 10840 | ZNF77     | 58.48941012 | 0.313124847 | 0.13352  | 2.345154 | 0.019019 | 0.034391 |
| 11401 | LMAN1     | 6672.351148 | 0.313037847 | 0.145662 | 2.149074 | 0.031629 | 0.054377 |
| 9208  | ZNF687    | 676.2457993 | 0.313025778 | 0.106641 | 2.935325 | 0.003332 | 0.007093 |
| 9427  | PTPDC1    | 191.411395  | 0.31270012  | 0.109805 | 2.847787 | 0.004402 | 0.009154 |
| 9121  | HUWE1     | 5262.84877  | 0.312651331 | 0.105314 | 2.968744 | 0.00299  | 0.006426 |
| 12294 | RPS6KA2   | 1200.314776 | 0.312640923 | 0.167385 | 1.867799 | 0.06179  | 0.098515 |
| 13512 | GLIPR1L2  | 27.70963469 | 0.312551826 | 0.210538 | 1.484539 | 0.137666 | 0.199703 |
| 9526  | MAK16     | 384.8269327 | 0.312345371 | 0.111242 | 2.807799 | 0.004988 | 0.010264 |
| 15577 | FERMT1    | 83.27747943 | 0.312212612 | 0.371035 | 0.841464 | 0.400088 | 0.503443 |
| 16622 | PPP1R1B   | 6.785247147 | 0.312143349 | 0.575255 | 0.542617 | 0.587393 | 0.692638 |
| 8693  | YPEL5     | 2544.089334 | 0.312024656 | 0.099591 | 3.133069 | 0.00173  | 0.003901 |
| 6307  | DYRK1A    | 1497.883486 | 0.311914758 | 0.075654 | 4.122897 | 3.74E-05 | 0.000116 |
| 13327 | C4orf36   | 5.348982422 | 0.311732789 | 0.203147 | 1.534516 | 0.124903 | 0.183704 |
| 10153 | ZNF226    | 327.0793212 | 0.311692458 | 0.119953 | 2.59845  | 0.009365 | 0.018079 |
| 9434  | UBR5      | 1722.157226 | 0.311659176 | 0.109563 | 2.844558 | 0.004447 | 0.00924  |
| 8723  | CNOT1     | 4075.807996 | 0.311617055 | 0.099881 | 3.119896 | 0.001809 | 0.004065 |
| 6190  | CPSF7     | 1825.605521 | 0.311563529 | 0.074541 | 4.179739 | 2.92E-05 | 9.24E-05 |
| 9311  | TMBIM4    | 1916.268609 | 0.311050489 | 0.107395 | 2.896313 | 0.003776 | 0.007949 |
| 9894  | ZSCAN20   | 55.65483969 | 0.310927758 | 0.115594 | 2.689835 | 0.007149 | 0.014162 |
| 10096 | ZNF407    | 280.345983  | 0.310776684 | 0.118727 | 2.61757  | 0.008856 | 0.017193 |
| 6755  | CNOT4     | 595.6994    | 0.310522223 | 0.079269 | 3.917329 | 8.95E-05 | 0.00026  |
| 10977 | APLP2     | 19645.35414 | 0.31043591  | 0.135298 | 2.294466 | 0.021764 | 0.038859 |
| 13019 | BNIP3L    | 5919.768905 | 0.310367497 | 0.18946  | 1.638168 | 0.101387 | 0.152645 |
| 9551  | TMBIM6    | 31065.63236 | 0.310218294 | 0.110739 | 2.801335 | 0.005089 | 0.010444 |
| 15580 | PROX2     | 0.840845137 | 0.310174189 | 0.369093 | 0.840368 | 0.400702 | 0.504118 |
| 10228 | METTL3    | 483.5836595 | 0.310152171 | 0.120572 | 2.572333 | 0.010102 | 0.019359 |
| 10451 | LOC441089 | 92.80506843 | 0.310036174 | 0.124378 | 2.492687 | 0.012678 | 0.023778 |
| 10712 | TAB2      | 1784.623855 | 0.309629587 | 0.129371 | 2.393355 | 0.016695 | 0.030549 |
| 8991  | TRAPPC2   | 337.8665666 | 0.30943103  | 0.102621 | 3.015294 | 0.002567 | 0.005597 |
| 13521 | BACH2     | 44.43953618 | 0.309387353 | 0.20888  | 1.48117  | 0.138561 | 0.200854 |
| 8880  | CBFA2T2   | 619.010355  | 0.309265876 | 0.101058 | 3.060273 | 0.002211 | 0.004881 |
| 11378 | SERHL     | 81.42220362 | 0.309104017 | 0.143149 | 2.159313 | 0.030826 | 0.053104 |
| 15446 | BMP3      | 4.048646889 | 0.309003071 | 0.35319  | 0.874891 | 0.381633 | 0.484293 |

|       |          |             |             |          |          |          |          |
|-------|----------|-------------|-------------|----------|----------|----------|----------|
| 7941  | CCAR1    | 1062.612961 | 0.308954905 | 0.090015 | 3.432242 | 0.000599 | 0.001478 |
| 8448  | CAMSAP1  | 701.175607  | 0.308778362 | 0.095653 | 3.228114 | 0.001246 | 0.002891 |
| 8546  | C5orf22  | 508.1781229 | 0.308751636 | 0.096749 | 3.19128  | 0.001416 | 0.003249 |
| 15418 | C7orf57  | 6.300818249 | 0.308698723 | 0.349132 | 0.884189 | 0.376594 | 0.478767 |
| 11285 | FARP1    | 3033.354896 | 0.308661789 | 0.141328 | 2.184003 | 0.028962 | 0.050304 |
| 13092 | ZNF177   | 77.20337224 | 0.308506666 | 0.191161 | 1.613856 | 0.106559 | 0.159549 |
| 8862  | PARP2    | 304.1863013 | 0.308404483 | 0.100594 | 3.065838 | 0.002171 | 0.004801 |
| 7818  | RBBP6    | 1074.379634 | 0.308341119 | 0.088197 | 3.496052 | 0.000472 | 0.001184 |
| 11225 | NDUFA10  | 2029.102859 | 0.308137618 | 0.139361 | 2.211072 | 0.027031 | 0.047201 |
| 16744 | SCGB2A1  | 5.595406308 | 0.308071352 | 0.607335 | 0.507251 | 0.611978 | 0.716399 |
| 5893  | ZNF592   | 1178.730755 | 0.308069566 | 0.071249 | 4.323824 | 1.53E-05 | 5.10E-05 |
| 9158  | SYNCRIP  | 3277.826665 | 0.308002536 | 0.1042   | 2.955887 | 0.003118 | 0.006673 |
| 8221  | NGLY1    | 499.1146891 | 0.307996278 | 0.092661 | 3.323892 | 0.000888 | 0.002117 |
| 8286  | LOC92249 | 529.7252753 | 0.307884799 | 0.093336 | 3.298658 | 0.000971 | 0.002298 |
| 14415 | HPN      | 2985.619925 | 0.30777277  | 0.257853 | 1.193598 | 0.232635 | 0.316329 |
| 13291 | WFS1     | 913.0527841 | 0.307742436 | 0.199083 | 1.545796 | 0.122154 | 0.180147 |
| 8756  | MRPS9    | 521.7112375 | 0.307676267 | 0.099127 | 3.103852 | 0.00191  | 0.004276 |
| 6872  | SLC9A6   | 532.0964128 | 0.307629407 | 0.07939  | 3.874915 | 0.000107 | 0.000304 |
| 16122 | C1orf227 | 0.584470966 | 0.307097746 | 0.45505  | 0.674865 | 0.499761 | 0.607606 |
| 10980 | ZNF823   | 135.4797795 | 0.306934972 | 0.13384  | 2.293297 | 0.021831 | 0.038972 |
| 9935  | SNN      | 779.5941089 | 0.306874486 | 0.114665 | 2.676265 | 0.007445 | 0.014688 |
| 11327 | LSS      | 626.9305717 | 0.306847851 | 0.141319 | 2.171316 | 0.029907 | 0.051754 |
| 8226  | PEX11B   | 800.7591929 | 0.306750811 | 0.092332 | 3.322251 | 0.000893 | 0.002128 |
| 15261 | VSIG2    | 12.6993761  | 0.306488038 | 0.329359 | 0.93056  | 0.352081 | 0.452208 |
| 9724  | MED7     | 276.627505  | 0.305971755 | 0.111654 | 2.740365 | 0.006137 | 0.012371 |
| 11472 | ACTR3B   | 138.2722038 | 0.305948086 | 0.14374  | 2.128487 | 0.033297 | 0.056891 |
| 12888 | MINA     | 513.1263    | 0.305778232 | 0.182352 | 1.67686  | 0.09357  | 0.142312 |
| 7865  | SFRS13A  | 1277.384684 | 0.305764265 | 0.088228 | 3.465609 | 0.000529 | 0.001319 |
| 11280 | ZNF491   | 44.9492467  | 0.305445787 | 0.139763 | 2.185456 | 0.028855 | 0.050141 |
| 9021  | C10orf88 | 193.2996028 | 0.305410728 | 0.101654 | 3.004418 | 0.002661 | 0.005782 |
| 4519  | MRFAP1   | 5723.236678 | 0.305331253 | 0.060762 | 5.025064 | 5.03E-07 | 2.18E-06 |
| 9525  | DHX40    | 1713.395549 | 0.305097971 | 0.108636 | 2.80845  | 0.004978 | 0.010244 |
| 11320 | C22orf32 | 724.0726641 | 0.305080243 | 0.14036  | 2.17356  | 0.029738 | 0.051493 |
| 16301 | GPR111   | 5.063725703 | 0.305071196 | 0.486816 | 0.626666 | 0.530878 | 0.63835  |
| 10900 | DHRS12   | 328.410336  | 0.304846697 | 0.131307 | 2.321642 | 0.020252 | 0.036419 |
| 14810 | ENTPD2   | 265.4309205 | 0.30475798  | 0.287043 | 1.061714 | 0.288365 | 0.381651 |
| 11051 | CDK17    | 865.429975  | 0.304705582 | 0.134037 | 2.273289 | 0.023009 | 0.040803 |
| 11205 | GAK      | 1552.108611 | 0.304699888 | 0.137253 | 2.219979 | 0.02642  | 0.046215 |
| 17396 | C1orf65  | 0.910342314 | 0.30463838  | 0.888784 | 0.342759 | 0.73178  | 0.824536 |
| 11869 | RASAL2   | 991.1170635 | 0.304536536 | 0.152193 | 2.000984 | 0.045394 | 0.074967 |
| 15666 | TM6SF2   | 87.92177636 | 0.3039438   | 0.371764 | 0.817571 | 0.413602 | 0.517491 |
| 10698 | STOM     | 9197.20253  | 0.303843965 | 0.126712 | 2.397907 | 0.016489 | 0.030211 |
| 17497 | VCX3B    | 0.449660825 | 0.303786899 | 0.963889 | 0.315168 | 0.752634 | 0.843142 |
| 12857 | C6orf170 | 66.1155116  | 0.303731251 | 0.179753 | 1.689712 | 0.091083 | 0.13886  |
| 13133 | RTP4     | 259.9220969 | 0.303565313 | 0.189949 | 1.598138 | 0.110012 | 0.164193 |
| 4345  | CTCF     | 1285.82735  | 0.303440606 | 0.059099 | 5.134419 | 2.83E-07 | 1.28E-06 |
| 17196 | C6orf146 | 0.614384932 | 0.303270365 | 0.781094 | 0.388263 | 0.697821 | 0.795417 |

|       |           |             |             |          |          |          |          |
|-------|-----------|-------------|-------------|----------|----------|----------|----------|
| 10861 | ING2      | 219.784115  | 0.30321225  | 0.129805 | 2.335909 | 0.019496 | 0.035184 |
| 12460 | ADAM10    | 2356.266856 | 0.30313231  | 0.166947 | 1.815736 | 0.069411 | 0.109191 |
| 15306 | QRFPR     | 319.0140161 | 0.3028842   | 0.329443 | 0.919383 | 0.357895 | 0.458324 |
| 12241 | NFIC      | 801.7485466 | 0.302700044 | 0.160582 | 1.88502  | 0.059427 | 0.095158 |
| 15474 | C17orf55  | 33.53857771 | 0.302586181 | 0.348645 | 0.867893 | 0.385453 | 0.488255 |
| 12558 | GALNTL4   | 859.1702032 | 0.302509039 | 0.169307 | 1.786749 | 0.073978 | 0.115468 |
| 14041 | FGL2      | 2140.62032  | 0.302413495 | 0.231655 | 1.305446 | 0.191741 | 0.267667 |
| 16479 | HIST3H2BI | 1.348894797 | 0.30234965  | 0.523387 | 0.577679 | 0.563481 | 0.670234 |
| 16808 | TM4SF20   | 0.543786792 | 0.302321648 | 0.618558 | 0.488752 | 0.625017 | 0.728903 |
| 14010 | FLJ37307  | 4.206985821 | 0.302181708 | 0.229713 | 1.315475 | 0.18835  | 0.263516 |
| 11252 | KIAA0020  | 584.1194685 | 0.302039322 | 0.137329 | 2.199379 | 0.027851 | 0.048516 |
| 13570 | OC1001282 | 59.31156676 | 0.301995358 | 0.206272 | 1.464063 | 0.143177 | 0.20681  |
| 9540  | HKR1      | 723.2495013 | 0.301984257 | 0.107739 | 2.802922 | 0.005064 | 0.010405 |
| 15272 | MYCBPAP   | 6.78960943  | 0.301706414 | 0.325249 | 0.927618 | 0.353606 | 0.453839 |
| 14342 | MDH1B     | 38.81488392 | 0.301629519 | 0.247923 | 1.216627 | 0.223746 | 0.305791 |
| 10012 | TMEM186   | 234.8709509 | 0.301593994 | 0.113837 | 2.649348 | 0.008065 | 0.01579  |
| 10858 | MRI1      | 525.8586843 | 0.301501902 | 0.12899  | 2.33741  | 0.019418 | 0.035053 |
| 12608 | SGSM2     | 908.4548623 | 0.301069775 | 0.170213 | 1.768778 | 0.076931 | 0.119601 |
| 10286 | PINX1     | 93.0883414  | 0.301069496 | 0.11805  | 2.550357 | 0.010761 | 0.020507 |
| 15326 | POM121L1  | 2.040261552 | 0.300948565 | 0.329866 | 0.912336 | 0.361592 | 0.462453 |
| 10746 | ZNF425    | 51.44904043 | 0.300917425 | 0.126296 | 2.382629 | 0.01719  | 0.031354 |
| 17137 | PCSK2     | 1.517245391 | 0.300840993 | 0.748755 | 0.401788 | 0.68784  | 0.786739 |
| 13373 | LOC253039 | 362.222855  | 0.300823912 | 0.19798  | 1.519466 | 0.128645 | 0.188557 |
| 10688 | DISP1     | 432.0154232 | 0.300787785 | 0.125287 | 2.400787 | 0.01636  | 0.03     |
| 11775 | SEL1L     | 4296.326462 | 0.300702978 | 0.148207 | 2.02894  | 0.042464 | 0.070688 |
| 14034 | REL       | 69.8306136  | 0.300453743 | 0.229725 | 1.307885 | 0.190912 | 0.266644 |
| 11045 | RASA1     | 965.5333623 | 0.300343867 | 0.132042 | 2.274602 | 0.02293  | 0.040692 |
| 9075  | KCTD18    | 403.0691799 | 0.30029202  | 0.100515 | 2.987529 | 0.002812 | 0.006074 |
| 7010  | C11orf57  | 874.669575  | 0.300237402 | 0.078613 | 3.819171 | 0.000134 | 0.000374 |
| 11427 | LOC284440 | 81.50673417 | 0.300178881 | 0.140259 | 2.14018  | 0.03234  | 0.055474 |
| 13112 | FXYD6     | 1046.947335 | 0.30003831  | 0.186682 | 1.607217 | 0.108007 | 0.161458 |
| 9150  | B3GALNT2  | 417.348     | 0.300007743 | 0.101405 | 2.958503 | 0.003091 | 0.006623 |
| 9269  | TMEM14B   | 850.9267402 | 0.299819583 | 0.103035 | 2.909882 | 0.003616 | 0.007646 |
| 12820 | IL11RA    | 139.6139869 | 0.299688117 | 0.176345 | 1.699444 | 0.089235 | 0.136436 |
| 7368  | SFRS6     | 2962.540038 | 0.299638514 | 0.081632 | 3.670597 | 0.000242 | 0.000644 |
| 11362 | CUEDC1    | 276.143422  | 0.299597966 | 0.138504 | 2.163104 | 0.030533 | 0.052674 |
| 10177 | MFS9      | 154.2412825 | 0.299548955 | 0.115636 | 2.59044  | 0.009585 | 0.018461 |
| 12818 | ECHDC2    | 1071.589929 | 0.299486333 | 0.176181 | 1.699877 | 0.089154 | 0.136342 |
| 10975 | ZNF689    | 138.7661946 | 0.299390744 | 0.130446 | 2.295126 | 0.021726 | 0.038802 |
| 8303  | HNRNPH3   | 2416.760506 | 0.299199966 | 0.09086  | 3.292978 | 0.000991 | 0.00234  |
| 10152 | PPID      | 681.0725654 | 0.298968282 | 0.115054 | 2.598506 | 0.009363 | 0.018078 |
| 10644 | MAGEF1    | 762.1950669 | 0.298951079 | 0.123729 | 2.416178 | 0.015684 | 0.028883 |
| 11857 | RMND1     | 606.3502773 | 0.298522501 | 0.149    | 2.003502 | 0.045123 | 0.074594 |
| 6018  | C15orf44  | 806.0068928 | 0.298447215 | 0.07012  | 4.256209 | 2.08E-05 | 6.77E-05 |
| 11039 | SLC26A2   | 698.179337  | 0.298398312 | 0.131043 | 2.277102 | 0.02278  | 0.040449 |
| 7980  | GLE1      | 807.6438792 | 0.298310901 | 0.087253 | 3.418936 | 0.000629 | 0.001544 |
| 15539 | C22orf34  | 6.505296443 | 0.298255178 | 0.351272 | 0.849071 | 0.395842 | 0.499303 |

|       |           |             |             |          |          |          |          |
|-------|-----------|-------------|-------------|----------|----------|----------|----------|
| 8187  | C2orf56   | 262.1115523 | 0.298187453 | 0.08931  | 3.338792 | 0.000841 | 0.002014 |
| 15180 | CRNA0016  | 1.69695805  | 0.298099576 | 0.312675 | 0.953385 | 0.340395 | 0.439553 |
| 9485  | ADO       | 616.4023093 | 0.298086428 | 0.105589 | 2.823078 | 0.004757 | 0.009829 |
| 10309 | TULP4     | 592.4846309 | 0.298044481 | 0.117228 | 2.542427 | 0.011009 | 0.020931 |
| 13185 | CARD6     | 379.5549185 | 0.298043016 | 0.1881   | 1.58449  | 0.113082 | 0.16811  |
| 16448 | OR10AD1   | 0.59643192  | 0.298041099 | 0.507309 | 0.587494 | 0.556872 | 0.663622 |
| 13528 | OC1001909 | 186.7607807 | 0.297993521 | 0.201633 | 1.477903 | 0.139434 | 0.202029 |
| 10225 | SHQ1      | 332.4864679 | 0.297862204 | 0.115761 | 2.573071 | 0.01008  | 0.019323 |
| 13564 | INF2      | 2706.769019 | 0.297835369 | 0.203208 | 1.465668 | 0.142739 | 0.206268 |
| 14231 | RFX2      | 243.4924577 | 0.297806784 | 0.238405 | 1.249165 | 0.211605 | 0.291465 |
| 11098 | MACF1     | 5074.179613 | 0.297713582 | 0.131968 | 2.255952 | 0.024074 | 0.042518 |
| 9920  | ZC3H6     | 380.3031095 | 0.297595985 | 0.111042 | 2.680028 | 0.007362 | 0.014546 |
| 10577 | TOP1      | 2439.866669 | 0.297448557 | 0.121706 | 2.443985 | 0.014526 | 0.026919 |
| 15162 | PTPRR     | 33.0234758  | 0.297405385 | 0.310554 | 0.957662 | 0.338233 | 0.437258 |
| 6986  | PSPC1     | 552.3978859 | 0.297169146 | 0.07757  | 3.830961 | 0.000128 | 0.000358 |
| 9368  | NOL9      | 159.9544154 | 0.296995849 | 0.10335  | 2.873681 | 0.004057 | 0.00849  |
| 11235 | SLMO2     | 1487.762938 | 0.296927119 | 0.134615 | 2.205756 | 0.027401 | 0.047805 |
| 12656 | KIAA1715  | 1069.661521 | 0.296924678 | 0.169181 | 1.755076 | 0.079246 | 0.122733 |
| 15884 | FOXP2     | 94.02200214 | 0.296869624 | 0.397133 | 0.747531 | 0.454743 | 0.561121 |
| 13128 | GIMAP6    | 1273.343013 | 0.296861125 | 0.185409 | 1.601113 | 0.109352 | 0.16327  |
| 12601 | PLS3      | 3844.026793 | 0.296805357 | 0.167397 | 1.773065 | 0.076218 | 0.118558 |
| 10301 | CCDC117   | 718.9524033 | 0.296736027 | 0.116583 | 2.545272 | 0.010919 | 0.020777 |
| 7855  | USP42     | 346.5227429 | 0.296668394 | 0.085506 | 3.469564 | 0.000521 | 0.001301 |
| 11042 | KIF1C     | 2418.812995 | 0.29648475  | 0.130269 | 2.275942 | 0.022849 | 0.040561 |
| 12520 | FAM168A   | 228.5829379 | 0.296287906 | 0.16479  | 1.797975 | 0.072181 | 0.113005 |
| 13098 | NHEDC1    | 4.233630673 | 0.296218001 | 0.183734 | 1.61221  | 0.106916 | 0.159999 |
| 13130 | ITGA1     | 3314.096432 | 0.296189519 | 0.18511  | 1.600075 | 0.109582 | 0.163588 |
| 11566 | ELF1      | 1490.459061 | 0.296026967 | 0.14143  | 2.093106 | 0.03634  | 0.061588 |
| 17447 | PRDM7     | 0.425360751 | 0.295841593 | 0.903902 | 0.327294 | 0.743446 | 0.835231 |
| 14318 | LOC283314 | 475.7573989 | 0.295797622 | 0.241538 | 1.224644 | 0.22071  | 0.302146 |
| 6861  | TMEM57    | 829.7140043 | 0.295755865 | 0.076282 | 3.877157 | 0.000106 | 0.000302 |
| 10325 | JRKL      | 466.2390037 | 0.295625653 | 0.11646  | 2.538433 | 0.011135 | 0.021139 |
| 16635 | CAGE1     | 0.376857027 | 0.295586597 | 0.548284 | 0.539112 | 0.589809 | 0.694972 |
| 16844 | TPO       | 0.350021088 | 0.295586503 | 0.616009 | 0.479841 | 0.63134  | 0.734801 |
| 17056 | GPR52     | 0.29538182  | 0.295586351 | 0.694126 | 0.42584  | 0.670225 | 0.770232 |
| 17069 | BTNL2     | 0.255721282 | 0.295586311 | 0.701323 | 0.421469 | 0.673412 | 0.773306 |
| 17185 | C2orf78   | 0.379465498 | 0.295586311 | 0.757501 | 0.390212 | 0.69638  | 0.794236 |
| 17325 | VCX       | 0.321829885 | 0.295586153 | 0.818225 | 0.361253 | 0.71791  | 0.812223 |
| 17374 | CCDC38    | 0.233077063 | 0.295586006 | 0.851276 | 0.347227 | 0.728421 | 0.821765 |
| 17536 | CRNA0016  | 0.359278868 | 0.295585912 | 0.963612 | 0.306748 | 0.759035 | 0.848418 |
| 17500 | TAAR5     | 0.192607221 | 0.29558576  | 0.938556 | 0.314937 | 0.75281  | 0.84319  |
| 17631 | ZNF716    | 0.291853132 | 0.295585653 | 1.040592 | 0.284055 | 0.776368 | 0.863161 |
| 17570 | IL5       | 0.1797456   | 0.295585605 | 0.989198 | 0.298813 | 0.765082 | 0.853522 |
| 17571 | APOBEC4   | 0.178809754 | 0.295585604 | 0.989597 | 0.298693 | 0.765174 | 0.853527 |
| 17669 | FAM46D    | 0.248084736 | 0.295585475 | 1.072378 | 0.275636 | 0.782828 | 0.868426 |
| 17650 | KBTBD13   | 0.154782171 | 0.295585386 | 1.057457 | 0.279525 | 0.779842 | 0.866005 |
| 17725 | KRTAP5-6  | 0.185435724 | 0.295585209 | 1.12897  | 0.261818 | 0.793461 | 0.877441 |

|       |            |             |             |          |          |          |          |
|-------|------------|-------------|-------------|----------|----------|----------|----------|
| 17818 | PTF1A      | 0.138359858 | 0.295584841 | 1.218914 | 0.242499 | 0.808394 | 0.889288 |
| 18087 | MT1IP      | 0.1179037   | 0.295583396 | 1.572106 | 0.188017 | 0.850863 | 0.922098 |
| 18169 | GHRHR      | 0.118369179 | 0.295582662 | 1.728619 | 0.170994 | 0.864229 | 0.932344 |
| 18175 | CLRN1      | 0.099637775 | 0.295582466 | 1.750232 | 0.168882 | 0.86589  | 0.933827 |
| 18242 | FLJ40504   | 0.139193587 | 0.295581882 | 1.899875 | 0.15558  | 0.876364 | 0.941652 |
| 18246 | DEFB125    | 0.119079415 | 0.295581699 | 1.914454 | 0.154395 | 0.877298 | 0.942449 |
| 18269 | IFNA1      | 0.080356247 | 0.295581087 | 1.983831 | 0.148995 | 0.881558 | 0.945832 |
| 18380 | OR2D2      | 0.079034911 | 0.295579536 | 2.23242  | 0.132403 | 0.894665 | 0.954099 |
| 18467 | OPTC       | 0.08150135  | 0.295577453 | 2.528087 | 0.116917 | 0.906925 | 0.962737 |
| 18496 | PRG3       | 0.06138215  | 0.29557648  | 2.629432 | 0.112411 | 0.910498 | 0.964893 |
| 18497 | DPRX       | 0.060350915 | 0.295576424 | 2.636428 | 0.112112 | 0.910734 | 0.96504  |
| 18529 | NBPF22P    | 0.099196614 | 0.295575203 | 2.840496 | 0.104058 | 0.917124 | 0.970184 |
| 18548 | GABRA6     | 0.144292475 | 0.295575079 | 2.91407  | 0.10143  | 0.919209 | 0.970766 |
| 18544 | CCT8L2     | 0.058837416 | 0.295574099 | 2.91407  | 0.10143  | 0.919209 | 0.970766 |
| 18546 | DEFB118    | 0.061312547 | 0.295574099 | 2.91407  | 0.10143  | 0.919209 | 0.970766 |
| 18552 | LOC732275  | 0.05910443  | 0.295574099 | 2.91407  | 0.10143  | 0.919209 | 0.970766 |
| 18559 | SNORA70    | 0.059769636 | 0.295574099 | 2.91407  | 0.10143  | 0.919209 | 0.970766 |
| 18545 | CFC1B      | 0.042972694 | 0.295573854 | 2.91407  | 0.10143  | 0.919209 | 0.970766 |
| 18551 | KRTAP13-1  | 0.04257075  | 0.295573854 | 2.91407  | 0.10143  | 0.919209 | 0.970766 |
| 18555 | OR10P1     | 0.042003151 | 0.295573854 | 2.91407  | 0.10143  | 0.919209 | 0.970766 |
| 18557 | PRSS41     | 0.039662643 | 0.295573854 | 2.91407  | 0.10143  | 0.919209 | 0.970766 |
| 18560 | SULT1C3    | 0.043781459 | 0.295573854 | 2.91407  | 0.10143  | 0.919209 | 0.970766 |
| 14547 | IL18R1     | 237.9147131 | 0.295481284 | 0.256516 | 1.151901 | 0.249362 | 0.335996 |
| 12008 | STARD8     | 755.0829196 | 0.295463644 | 0.150831 | 1.958907 | 0.050124 | 0.081818 |
| 8864  | C9orf85    | 117.7368124 | 0.295442068 | 0.096397 | 3.06485  | 0.002178 | 0.004816 |
| 8955  | AP3M1      | 1064.545788 | 0.295426103 | 0.097487 | 3.030418 | 0.002442 | 0.005345 |
| 8522  | TMEM59     | 6774.354648 | 0.295058243 | 0.092301 | 3.196708 | 0.00139  | 0.003197 |
| 16983 | C17orf99   | 0.411576554 | 0.295017648 | 0.665909 | 0.44303  | 0.657744 | 0.759138 |
| 10389 | GNRHR2     | 376.3432456 | 0.294981998 | 0.117506 | 2.510347 | 0.012061 | 0.022756 |
| 10903 | TM2D1      | 420.3468158 | 0.29476133  | 0.126995 | 2.321043 | 0.020285 | 0.036467 |
| 7730  | EXOSC3     | 229.1034149 | 0.294760691 | 0.083543 | 3.528236 | 0.000418 | 0.001061 |
| 13900 | LOC728819  | 27.35957706 | 0.294481959 | 0.218372 | 1.348531 | 0.177488 | 0.250283 |
| 14609 | C20orf165  | 11.4116639  | 0.294462156 | 0.260483 | 1.130445 | 0.258289 | 0.346548 |
| 15400 | C12orf27   | 77.83601169 | 0.294459045 | 0.330688 | 0.890443 | 0.373228 | 0.475041 |
| 10335 | PRCP       | 3979.73174  | 0.293507025 | 0.115757 | 2.535551 | 0.011227 | 0.021293 |
| 11656 | C11orf1    | 483.2217551 | 0.293445133 | 0.142483 | 2.059512 | 0.039445 | 0.066332 |
| 12049 | LOC1001300 | 87.04916819 | 0.29340529  | 0.150922 | 1.94408  | 0.051886 | 0.084406 |
| 11717 | C4orf34    | 556.5021218 | 0.293338569 | 0.143282 | 2.047274 | 0.040631 | 0.067971 |
| 15915 | WSCD2      | 11.08306194 | 0.293219691 | 0.397729 | 0.737235 | 0.46098  | 0.567745 |
| 15513 | DLX6AS     | 2.406181962 | 0.293218514 | 0.342731 | 0.855535 | 0.392255 | 0.495622 |
| 9577  | NDUFB3     | 743.9867487 | 0.293028741 | 0.105056 | 2.789254 | 0.005283 | 0.010812 |
| 9141  | ALG5       | 694.6929723 | 0.292938246 | 0.098917 | 2.961445 | 0.003062 | 0.006566 |
| 13307 | TPRN       | 321.3780528 | 0.292801903 | 0.190052 | 1.540641 | 0.123404 | 0.181773 |
| 12064 | VPS37A     | 1039.506225 | 0.292697732 | 0.150877 | 1.939972 | 0.052383 | 0.085115 |
| 12970 | FAS        | 771.6475787 | 0.292516098 | 0.17702  | 1.652444 | 0.098444 | 0.14877  |
| 10238 | VRK3       | 771.8890389 | 0.292454345 | 0.113778 | 2.57039  | 0.010158 | 0.019449 |
| 4378  | HNRNPK     | 11406.67881 | 0.292371352 | 0.057157 | 5.115194 | 3.13E-07 | 1.40E-06 |

|       |          |             |             |          |          |          |          |
|-------|----------|-------------|-------------|----------|----------|----------|----------|
| 9906  | TCF7L2   | 583.3316556 | 0.292231561 | 0.10878  | 2.686441 | 0.007222 | 0.014291 |
| 9785  | DDX18    | 1792.655146 | 0.292157147 | 0.107385 | 2.720653 | 0.006515 | 0.01305  |
| 8267  | DNAJC21  | 1099.729736 | 0.292100034 | 0.088368 | 3.305501 | 0.000948 | 0.002248 |
| 11529 | ALG11    | 19.79837638 | 0.29206219  | 0.13854  | 2.108146 | 0.035018 | 0.059536 |
| 11999 | KDM1B    | 495.5141697 | 0.292060754 | 0.148951 | 1.960778 | 0.049905 | 0.081522 |
| 14320 | KIF5C    | 137.1049608 | 0.292019686 | 0.238587 | 1.223956 | 0.220969 | 0.302459 |
| 13942 | TSPYL5   | 448.2060576 | 0.291975473 | 0.218426 | 1.336724 | 0.181313 | 0.254907 |
| 15635 | GOLGA6B  | 2.869193163 | 0.291911158 | 0.353403 | 0.826    | 0.408804 | 0.512502 |
| 14178 | HOXA9    | 394.2104792 | 0.291841294 | 0.231008 | 1.26334  | 0.206467 | 0.285439 |
| 7831  | DYNC1LI1 | 631.4679695 | 0.291814032 | 0.083725 | 3.485383 | 0.000491 | 0.00123  |
| 14068 | KLF4     | 659.8844986 | 0.291612113 | 0.224853 | 1.296902 | 0.194665 | 0.27121  |
| 11512 | MBNL2    | 2374.849738 | 0.291562409 | 0.138051 | 2.111985 | 0.034688 | 0.059061 |
| 11202 | SNAPC1   | 355.3335329 | 0.291521644 | 0.131258 | 2.220983 | 0.026352 | 0.04611  |
| 15668 | EFHB     | 16.47711603 | 0.291472209 | 0.356788 | 0.816933 | 0.413967 | 0.517881 |
| 16606 | ADAM29   | 0.77646414  | 0.29145315  | 0.532251 | 0.547586 | 0.583976 | 0.6893   |
| 13741 | DMD      | 552.2553772 | 0.291297262 | 0.207457 | 1.404137 | 0.160278 | 0.228629 |
| 14049 | LOC90834 | 21.21899125 | 0.291243051 | 0.223738 | 1.301713 | 0.193014 | 0.269291 |
| 7665  | ZBTB9    | 215.3573284 | 0.291064955 | 0.081923 | 3.552906 | 0.000381 | 0.000974 |
| 7540  | THOC2    | 1088.067706 | 0.290925665 | 0.080828 | 3.599329 | 0.000319 | 0.000829 |
| 14838 | MTMR9L   | 134.8345351 | 0.290787907 | 0.275583 | 1.055174 | 0.291346 | 0.384868 |
| 14490 | NHLRC4   | 27.06158321 | 0.290732033 | 0.248209 | 1.171318 | 0.241471 | 0.326644 |
| 8527  | CCDC55   | 713.7034367 | 0.290659348 | 0.090962 | 3.195403 | 0.001396 | 0.003209 |
| 13115 | RAB27A   | 603.1153492 | 0.290549397 | 0.180836 | 1.606699 | 0.10812  | 0.161591 |
| 8017  | AP2B1    | 5653.822995 | 0.290526683 | 0.085325 | 3.404961 | 0.000662 | 0.001617 |
| 10268 | HIPK1    | 1911.518991 | 0.290297689 | 0.113478 | 2.55819  | 0.010522 | 0.020084 |
| 11979 | GTF2H3   | 189.9649925 | 0.290156395 | 0.147609 | 1.965706 | 0.049333 | 0.08072  |
| 7527  | TIAL1    | 1237.895691 | 0.290156127 | 0.080488 | 3.604942 | 0.000312 | 0.000813 |
| 9496  | RHOT1    | 862.1028384 | 0.290087952 | 0.102842 | 2.820726 | 0.004792 | 0.009891 |
| 9965  | DOLK     | 394.1593441 | 0.290077031 | 0.10886  | 2.664678 | 0.007706 | 0.015158 |
| 13191 | SHROOM4  | 789.5733608 | 0.290047736 | 0.18332  | 1.582197 | 0.113605 | 0.168809 |
| 9128  | HUS1     | 328.7055464 | 0.290027864 | 0.097771 | 2.96641  | 0.003013 | 0.00647  |
| 14548 | FAM163A  | 24.30661723 | 0.289742825 | 0.251685 | 1.151211 | 0.249645 | 0.336355 |
| 14586 | ARHGAP20 | 39.5022012  | 0.289603317 | 0.253769 | 1.141207 | 0.253784 | 0.341041 |
| 8425  | C18orf8  | 484.7756225 | 0.289591432 | 0.089347 | 3.241186 | 0.00119  | 0.002769 |
| 13012 | ETS2     | 3908.968859 | 0.289230434 | 0.176377 | 1.639842 | 0.101038 | 0.15219  |
| 16411 | OPCML    | 224.0924874 | 0.289132474 | 0.482568 | 0.599154 | 0.54907  | 0.655799 |
| 9411  | MTF1     | 428.7823428 | 0.288895914 | 0.101247 | 2.85337  | 0.004326 | 0.00901  |
| 11107 | PGM2     | 643.5705355 | 0.288806138 | 0.128311 | 2.250824 | 0.024397 | 0.043054 |
| 7598  | NSMCE4A  | 339.6778021 | 0.288769258 | 0.080654 | 3.580365 | 0.000343 | 0.000885 |
| 12376 | TMCO4    | 662.2867053 | 0.288705492 | 0.156662 | 1.842852 | 0.065351 | 0.103502 |
| 10546 | RMND5B   | 639.1486567 | 0.288615792 | 0.117618 | 2.45384  | 0.014134 | 0.02627  |
| 14408 | TLE2     | 321.6974536 | 0.288560928 | 0.241461 | 1.19506  | 0.232063 | 0.315705 |
| 10816 | CRIP1    | 401.254382  | 0.28853447  | 0.122491 | 2.355559 | 0.018495 | 0.033517 |
| 10517 | SLC24A1  | 343.2594899 | 0.288354041 | 0.116969 | 2.465216 | 0.013693 | 0.02552  |
| 11971 | ARHGAP10 | 1032.872347 | 0.28835148  | 0.146509 | 1.968151 | 0.049051 | 0.080314 |
| 10984 | FAM76B   | 320.1908621 | 0.288238494 | 0.125753 | 2.292092 | 0.0219   | 0.039081 |
| 8719  | USP34    | 2351.702343 | 0.287582843 | 0.092087 | 3.122943 | 0.001791 | 0.004025 |

|       |           |             |             |          |          |          |          |
|-------|-----------|-------------|-------------|----------|----------|----------|----------|
| 10392 | ATR       | 646.9682937 | 0.287385516 | 0.114499 | 2.509939 | 0.012075 | 0.022776 |
| 13347 | EPB41L3   | 1422.31701  | 0.287271594 | 0.187871 | 1.529091 | 0.126242 | 0.185395 |
| 12226 | ZNF85     | 114.4823514 | 0.28724104  | 0.151991 | 1.889851 | 0.058778 | 0.094234 |
| 8182  | FIG4      | 489.7676128 | 0.287178154 | 0.085935 | 3.341805 | 0.000832 | 0.001994 |
| 11503 | SMAD1     | 584.8510427 | 0.287103176 | 0.135696 | 2.115781 | 0.034363 | 0.058553 |
| 11008 | FAM160B1  | 876.7698611 | 0.287010871 | 0.125476 | 2.287368 | 0.022174 | 0.039484 |
| 9500  | WDR5B     | 321.5658979 | 0.286993656 | 0.10177  | 2.820013 | 0.004802 | 0.009908 |
| 9373  | CAPRIN1   | 5003.253423 | 0.286972731 | 0.099935 | 2.871586 | 0.004084 | 0.008541 |
| 14950 | FHL5      | 235.3204686 | 0.286836403 | 0.280534 | 1.022464 | 0.306561 | 0.401934 |
| 8342  | C2orf64   | 602.8210123 | 0.286736829 | 0.087514 | 3.27647  | 0.001051 | 0.00247  |
| 12920 | EEA1      | 1159.621122 | 0.28672236  | 0.17198  | 1.667181 | 0.095478 | 0.144851 |
| 13394 | ZNF578    | 37.93349709 | 0.286700478 | 0.189528 | 1.51271  | 0.130353 | 0.190761 |
| 12554 | LOC440354 | 115.1614934 | 0.286586446 | 0.16021  | 1.788822 | 0.073643 | 0.114982 |
| 9702  | EXOG      | 140.7640933 | 0.286441623 | 0.104316 | 2.745914 | 0.006034 | 0.01219  |
| 9109  | BRD2      | 4120.030727 | 0.286346057 | 0.096256 | 2.974849 | 0.002931 | 0.006307 |
| 12803 | RUFY3     | 1342.631431 | 0.286320653 | 0.168167 | 1.702594 | 0.088644 | 0.135711 |
| 12279 | IGF2R     | 4651.093506 | 0.286301526 | 0.152912 | 1.872331 | 0.061161 | 0.097631 |
| 10619 | TBCC      | 357.4487217 | 0.286284388 | 0.117935 | 2.427481 | 0.015204 | 0.028064 |
| 9815  | GOLPH3    | 2575.71963  | 0.286270111 | 0.105538 | 2.712493 | 0.006678 | 0.013336 |
| 10565 | TUBD1     | 157.9471501 | 0.286034708 | 0.116857 | 2.447723 | 0.014376 | 0.026672 |
| 14017 | HIST1H2BI | 621.7410278 | 0.285971782 | 0.217634 | 1.314006 | 0.188844 | 0.264075 |
| 11004 | CEP57     | 783.2218281 | 0.285970985 | 0.124974 | 2.288241 | 0.022124 | 0.039408 |
| 12005 | TPCN2     | 630.1219715 | 0.285933784 | 0.145945 | 1.959191 | 0.05009  | 0.081778 |
| 13007 | ACLY      | 8948.451838 | 0.285618914 | 0.173947 | 1.641984 | 0.100593 | 0.15159  |
| 13680 | C3orf70   | 210.4352824 | 0.28552414  | 0.199998 | 1.427634 | 0.153397 | 0.219791 |
| 15114 | C9orf131  | 2.454107235 | 0.285450826 | 0.293735 | 0.971796 | 0.331152 | 0.429463 |
| 8581  | EIF3J     | 1251.284969 | 0.285406946 | 0.089753 | 3.179927 | 0.001473 | 0.003365 |
| 7474  | MORF4L1   | 4046.522485 | 0.285151881 | 0.078613 | 3.627265 | 0.000286 | 0.000751 |
| 12508 | INSIG2    | 1663.774955 | 0.285066136 | 0.158304 | 1.800752 | 0.071742 | 0.112417 |
| 8630  | WHAMM     | 357.9045577 | 0.284942358 | 0.09013  | 3.161444 | 0.00157  | 0.003566 |
| 9708  | SENP2     | 691.2268494 | 0.284788256 | 0.103732 | 2.745411 | 0.006044 | 0.012204 |
| 8504  | GPATCH8   | 1149.604285 | 0.284746746 | 0.088866 | 3.204224 | 0.001354 | 0.003121 |
| 10570 | INTS9     | 351.0379497 | 0.284638931 | 0.116323 | 2.446968 | 0.014406 | 0.026713 |
| 13201 | HIP1R     | 1539.282172 | 0.284366677 | 0.180149 | 1.578506 | 0.114449 | 0.169936 |
| 10562 | AGTPBP1   | 411.7156822 | 0.284226878 | 0.116092 | 2.448299 | 0.014353 | 0.026637 |
| 11835 | DHX33     | 265.2672076 | 0.284148654 | 0.141407 | 2.009437 | 0.044491 | 0.073679 |
| 10718 | SLC10A7   | 214.0659144 | 0.284019689 | 0.118825 | 2.39024  | 0.016837 | 0.030792 |
| 15777 | LOC348840 | 1.548906812 | 0.283917269 | 0.362828 | 0.782513 | 0.433913 | 0.539084 |
| 7199  | WDR92     | 160.6519087 | 0.283896802 | 0.075778 | 3.746437 | 0.000179 | 0.000488 |
| 8776  | FAM114A2  | 593.1067921 | 0.283762511 | 0.091728 | 3.093511 | 0.001978 | 0.004418 |
| 12547 | LM2-AKA   | 2862.052875 | 0.283614843 | 0.158264 | 1.792036 | 0.073127 | 0.114242 |
| 11917 | PDDC1     | 1164.599299 | 0.283484342 | 0.142946 | 1.983156 | 0.04735  | 0.077881 |
| 11603 | PBXIP1    | 3735.195187 | 0.283438125 | 0.136283 | 2.079771 | 0.037547 | 0.063428 |
| 14501 | ITGA9     | 238.6305509 | 0.283373897 | 0.242705 | 1.167567 | 0.242982 | 0.328438 |
| 12675 | NHSL1     | 423.8763534 | 0.283320029 | 0.162277 | 1.745899 | 0.080828 | 0.124995 |
| 10663 | AAK1      | 1257.247573 | 0.283307896 | 0.117709 | 2.406847 | 0.016091 | 0.029579 |
| 9619  | ZNF79     | 103.5039808 | 0.282843125 | 0.10202  | 2.772426 | 0.005564 | 0.011338 |



|       |           |             |             |          |          |          |          |
|-------|-----------|-------------|-------------|----------|----------|----------|----------|
| 8698  | CSNK1G1   | 586.8378628 | 0.282781371 | 0.090315 | 3.131057 | 0.001742 | 0.003925 |
| 8822  | SRP72     | 2244.927166 | 0.28267364  | 0.091722 | 3.081837 | 0.002057 | 0.004571 |
| 12063 | C10orf12  | 81.6440731  | 0.282536122 | 0.145644 | 1.939915 | 0.05239  | 0.085115 |
| 17094 | LYPD2     | 0.790745266 | 0.282499109 | 0.679828 | 0.415545 | 0.677743 | 0.777231 |
| 11238 | CDC26     | 98.41154942 | 0.282319367 | 0.128063 | 2.204543 | 0.027486 | 0.047941 |
| 12632 | DOCK4     | 1004.877049 | 0.282183993 | 0.159977 | 1.763906 | 0.077748 | 0.120622 |
| 8938  | UBIAD1    | 457.1325174 | 0.282107077 | 0.092862 | 3.037909 | 0.002382 | 0.005224 |
| 9590  | FAM65A    | 2268.61816  | 0.282098147 | 0.101359 | 2.783156 | 0.005383 | 0.011003 |
| 16501 | EEF1A2    | 130.4393791 | 0.282060923 | 0.492556 | 0.572647 | 0.566884 | 0.673383 |
| 9449  | FCF1      | 631.1925982 | 0.281900899 | 0.099324 | 2.838188 | 0.004537 | 0.009412 |
| 13431 | TMC7      | 59.56577356 | 0.281728419 | 0.187219 | 1.504806 | 0.132374 | 0.193185 |
| 12281 | TRIM52    | 289.402635  | 0.281518179 | 0.150367 | 1.872213 | 0.061177 | 0.097641 |
| 10084 | HAT1      | 807.6067183 | 0.281410675 | 0.107264 | 2.623529 | 0.008702 | 0.016914 |
| 15394 | JPH1      | 46.37625184 | 0.281238294 | 0.315397 | 0.891697 | 0.372555 | 0.47437  |
| 9256  | AHCYL1    | 3847.294851 | 0.28122567  | 0.09648  | 2.914875 | 0.003558 | 0.007535 |
| 9817  | ZBTB40    | 671.3689539 | 0.281209736 | 0.103708 | 2.711549 | 0.006697 | 0.013371 |
| 10500 | CEP350    | 1205.275165 | 0.281141051 | 0.113751 | 2.47155  | 0.013453 | 0.025113 |
| 11827 | UBA1      | 6964.958328 | 0.281050264 | 0.139666 | 2.012309 | 0.044187 | 0.073232 |
| 10075 | MED1      | 1131.583971 | 0.280491661 | 0.106779 | 2.626832 | 0.008618 | 0.016767 |
| 8851  | C4orf27   | 342.6256596 | 0.280441487 | 0.091351 | 3.069936 | 0.002141 | 0.004741 |
| 13810 | CXorf36   | 1304.419798 | 0.280425626 | 0.202738 | 1.383195 | 0.166605 | 0.236468 |
| 14503 | CDK18     | 5540.204465 | 0.280398063 | 0.240471 | 1.166037 | 0.2436   | 0.329228 |
| 8614  | SAP18     | 3109.083718 | 0.280313456 | 0.08845  | 3.169186 | 0.001529 | 0.003478 |
| 10813 | WDR36     | 938.0017221 | 0.280283151 | 0.118886 | 2.35758  | 0.018394 | 0.033344 |
| 16643 | CELF5     | 34.55622138 | 0.280240538 | 0.522001 | 0.536859 | 0.591365 | 0.696428 |
| 10627 | FMEM194E  | 190.3909936 | 0.280200907 | 0.115628 | 2.423295 | 0.01538  | 0.028368 |
| 10314 | LOC550112 | 301.4765407 | 0.280051852 | 0.110176 | 2.54187  | 0.011026 | 0.020954 |
| 11564 | CDKN1B    | 1466.07704  | 0.279935759 | 0.133742 | 2.093096 | 0.036341 | 0.061588 |
| 11562 | RSL24D1   | 2243.437244 | 0.279742796 | 0.133635 | 2.093338 | 0.036319 | 0.061571 |
| 8068  | BRD1      | 633.6816745 | 0.279729271 | 0.082644 | 3.384761 | 0.000712 | 0.001731 |
| 8928  | WDR37     | 455.2435546 | 0.279680525 | 0.091944 | 3.041864 | 0.002351 | 0.005162 |
| 11339 | KLHL5     | 920.4834159 | 0.279219767 | 0.12871  | 2.16938  | 0.030054 | 0.051952 |
| 12427 | ZNF267    | 515.9994929 | 0.279125378 | 0.152734 | 1.827521 | 0.067621 | 0.106659 |
| 16021 | ACTC1     | 84.91355512 | 0.278943778 | 0.395599 | 0.705118 | 0.480737 | 0.58816  |
| 14451 | TSPAN33   | 2007.780748 | 0.27876505  | 0.23583  | 1.182058 | 0.237183 | 0.321709 |
| 13109 | HERC5     | 274.7251091 | 0.278747086 | 0.173351 | 1.607989 | 0.107838 | 0.161242 |
| 12642 | C13orf37  | 462.9486018 | 0.278662059 | 0.158344 | 1.759857 | 0.078432 | 0.121606 |
| 14101 | GSTZ1     | 338.4680401 | 0.278468599 | 0.216121 | 1.288487 | 0.197576 | 0.27464  |
| 9243  | FAM185A   | 95.90547364 | 0.278384264 | 0.095314 | 2.920721 | 0.003492 | 0.007406 |
| 15895 | C15orf27  | 68.65197133 | 0.27835818  | 0.37405  | 0.744173 | 0.456772 | 0.56327  |
| 13035 | FAM50B    | 279.4541626 | 0.278021752 | 0.170208 | 1.633427 | 0.102379 | 0.15395  |
| 8817  | OCRL      | 938.845229  | 0.27776824  | 0.090116 | 3.08233  | 0.002054 | 0.004566 |
| 12022 | MTHFR     | 886.4828402 | 0.277763949 | 0.142077 | 1.955021 | 0.050581 | 0.082461 |
| 12170 | CIRBP     | 4981.42919  | 0.277762918 | 0.145699 | 1.906412 | 0.056597 | 0.091155 |
| 9353  | MRPL32    | 968.5695435 | 0.277660088 | 0.096452 | 2.878737 | 0.003993 | 0.008367 |
| 9372  | MAP2K5    | 309.3472539 | 0.277647875 | 0.096668 | 2.872179 | 0.004077 | 0.008526 |
| 12927 | SH3GLB2   | 812.6905901 | 0.277571806 | 0.166688 | 1.665223 | 0.095868 | 0.145364 |

|       |           |             |             |          |          |          |          |
|-------|-----------|-------------|-------------|----------|----------|----------|----------|
| 11523 | NMT2      | 483.9971361 | 0.2773135   | 0.131418 | 2.110166 | 0.034844 | 0.059275 |
| 10044 | AGA       | 546.599197  | 0.277214712 | 0.105162 | 2.636064 | 0.008387 | 0.016368 |
| 12779 | ZFYVE28   | 258.8104584 | 0.277176995 | 0.161935 | 1.711652 | 0.086961 | 0.133395 |
| 11015 | KIAA1191  | 4941.046145 | 0.277112272 | 0.121238 | 2.285693 | 0.022272 | 0.039633 |
| 14009 | SEMA4G    | 391.4280416 | 0.276878457 | 0.210398 | 1.315974 | 0.188183 | 0.2633   |
| 15071 | TNNI3K    | 22.8339331  | 0.27678103  | 0.280878 | 0.985415 | 0.32442  | 0.421933 |
| 12525 | MAP3K5    | 830.7806991 | 0.27673842  | 0.154018 | 1.79679  | 0.072369 | 0.113244 |
| 8617  | RPL7L1    | 749.6224013 | 0.276392836 | 0.087225 | 3.168732 | 0.001531 | 0.003483 |
| 12366 | WASF1     | 355.6160004 | 0.27618089  | 0.149607 | 1.846039 | 0.064887 | 0.10285  |
| 10275 | WDR59     | 707.7594417 | 0.276082131 | 0.108055 | 2.555027 | 0.010618 | 0.020255 |
| 9916  | PHF2      | 870.7488201 | 0.275944796 | 0.102897 | 2.681763 | 0.007324 | 0.014476 |
| 12848 | FRMD4B    | 874.7399542 | 0.275900278 | 0.163165 | 1.690923 | 0.090851 | 0.138604 |
| 8981  | VPS11     | 1551.330549 | 0.275898485 | 0.09135  | 3.020224 | 0.002526 | 0.005513 |
| 9932  | KPNA4     | 1811.771727 | 0.275527188 | 0.102923 | 2.677012 | 0.007428 | 0.01466  |
| 11724 | HMGCL     | 1273.610791 | 0.275219311 | 0.134559 | 2.045349 | 0.04082  | 0.068247 |
| 11382 | ZNF169    | 68.00160142 | 0.274958671 | 0.127397 | 2.158286 | 0.030906 | 0.053223 |
| 10805 | DPM1      | 525.7333682 | 0.274791397 | 0.11644  | 2.359949 | 0.018277 | 0.033157 |
| 11602 | BRF1      | 517.8653004 | 0.274689208 | 0.132059 | 2.080055 | 0.03752  | 0.063389 |
| 13039 | PTPRM     | 3103.079894 | 0.274518667 | 0.168156 | 1.632525 | 0.102569 | 0.154188 |
| 10651 | RNGTT     | 398.5385341 | 0.274418039 | 0.113698 | 2.413574 | 0.015797 | 0.029071 |
| 15095 | FAM19A1   | 2.409296555 | 0.27430049  | 0.280571 | 0.977651 | 0.328247 | 0.42626  |
| 11407 | AKT2      | 2158.274704 | 0.274191029 | 0.127724 | 2.146745 | 0.031814 | 0.054661 |
| 10872 | UBN2      | 720.2196995 | 0.273978282 | 0.11748  | 2.332124 | 0.019694 | 0.035506 |
| 10656 | GOPC      | 880.6736391 | 0.273963154 | 0.113609 | 2.411447 | 0.015889 | 0.029227 |
| 11686 | WDR24     | 337.6804216 | 0.273041147 | 0.132864 | 2.055049 | 0.039874 | 0.066881 |
| 9542  | REPS1     | 499.6907899 | 0.273009005 | 0.097412 | 2.802633 | 0.005069 | 0.010412 |
| 15183 | RGS16     | 545.1783594 | 0.272969863 | 0.286477 | 0.952851 | 0.340666 | 0.439794 |
| 14299 | TRIL      | 378.1527304 | 0.27294673  | 0.221978 | 1.229613 | 0.218842 | 0.299988 |
| 12309 | SNX6      | 1671.993636 | 0.272535677 | 0.146378 | 1.861866 | 0.062622 | 0.09972  |
| 13835 | C7orf63   | 127.7913327 | 0.272477359 | 0.198458 | 1.37297  | 0.169762 | 0.240513 |
| 11372 | TAF2      | 671.1475921 | 0.272222754 | 0.126019 | 2.16017  | 0.03076  | 0.053018 |
| 10523 | RAB10     | 3862.882176 | 0.272200426 | 0.110516 | 2.462993 | 0.013778 | 0.025665 |
| 10560 | C16orf46  | 43.50478175 | 0.272158564 | 0.111142 | 2.448744 | 0.014336 | 0.026609 |
| 12019 | FAM123B   | 178.3804061 | 0.272146163 | 0.139151 | 1.95576  | 0.050493 | 0.082346 |
| 10564 | C14orf169 | 196.9967706 | 0.272054825 | 0.111144 | 2.447767 | 0.014374 | 0.026671 |
| 10232 | C17orf85  | 588.7645361 | 0.271942986 | 0.105764 | 2.571233 | 0.010134 | 0.019413 |
| 10620 | UTP23     | 403.6258678 | 0.271850669 | 0.112005 | 2.427129 | 0.015219 | 0.028089 |
| 9861  | PRKRIR    | 981.0332976 | 0.271788097 | 0.100685 | 2.699402 | 0.006946 | 0.013808 |
| 12842 | SHB       | 758.3137258 | 0.271773357 | 0.160552 | 1.692739 | 0.090505 | 0.13814  |
| 15690 | C5orf40   | 1.173757958 | 0.27173912  | 0.335324 | 0.810377 | 0.417723 | 0.521848 |
| 13926 | SPINT1    | 2079.605582 | 0.271674684 | 0.202369 | 1.342471 | 0.179443 | 0.252569 |
| 16493 | PRSS12    | 27.05804699 | 0.27139224  | 0.47235  | 0.574557 | 0.565591 | 0.672173 |
| 13121 | NDUFB1    | 818.7259488 | 0.271303084 | 0.169119 | 1.604218 | 0.108666 | 0.162332 |
| 10539 | DNAJC11   | 1130.736556 | 0.271254553 | 0.110423 | 2.456508 | 0.014029 | 0.026093 |
| 11316 | SP3       | 1951.753122 | 0.271166767 | 0.124714 | 2.174307 | 0.029682 | 0.051414 |
| 12559 | DENND1C   | 499.4550704 | 0.271037453 | 0.151797 | 1.785528 | 0.074176 | 0.115767 |
| 7810  | ZNF434    | 293.8373692 | 0.271023511 | 0.077484 | 3.497782 | 0.000469 | 0.001177 |

|       |           |             |             |          |          |          |          |
|-------|-----------|-------------|-------------|----------|----------|----------|----------|
| 12288 | CLSTN1    | 5818.519371 | 0.270973711 | 0.144988 | 1.868944 | 0.061631 | 0.098309 |
| 12540 | USP11     | 1815.679043 | 0.270966443 | 0.151056 | 1.793809 | 0.072844 | 0.11386  |
| 12986 | FAM125B   | 310.680424  | 0.270895979 | 0.1643   | 1.648785 | 0.099192 | 0.149699 |
| 11259 | XRN2      | 2079.448035 | 0.270563175 | 0.123143 | 2.197154 | 0.028009 | 0.048762 |
| 10898 | C5orf43   | 1609.709238 | 0.270380098 | 0.116448 | 2.321898 | 0.020238 | 0.036401 |
| 10792 | TPRG1L    | 1477.341785 | 0.270282193 | 0.114295 | 2.364786 | 0.018041 | 0.032766 |
| 9897  | RAB3GAP1  | 1576.80006  | 0.270206774 | 0.100497 | 2.688699 | 0.007173 | 0.014206 |
| 9727  | PATZ1     | 827.7954835 | 0.270161549 | 0.09863  | 2.739135 | 0.00616  | 0.012413 |
| 10003 | CDK12     | 1104.587167 | 0.270105058 | 0.101858 | 2.651776 | 0.008007 | 0.01569  |
| 11652 | ENTPD4    | 331.1873805 | 0.270056678 | 0.131047 | 2.060756 | 0.039326 | 0.066149 |
| 10445 | PIGF      | 273.1688262 | 0.269990095 | 0.108163 | 2.49613  | 0.012556 | 0.023562 |
| 12321 | RNF19B    | 769.0204313 | 0.269811178 | 0.14514  | 1.858978 | 0.06303  | 0.100272 |
| 8993  | SPIN2B    | 85.61209085 | 0.269636989 | 0.089437 | 3.014817 | 0.002571 | 0.005604 |
| 7785  | FIP1L1    | 632.7295981 | 0.269554605 | 0.076887 | 3.505843 | 0.000455 | 0.001146 |
| 9195  | ACP1      | 1843.675836 | 0.269398584 | 0.091581 | 2.941644 | 0.003265 | 0.006958 |
| 17230 | OLIG2     | 7.835068414 | 0.269319956 | 0.705862 | 0.381548 | 0.702797 | 0.799508 |
| 12633 | MICAL3    | 2301.164751 | 0.269248435 | 0.152644 | 1.763903 | 0.077748 | 0.120622 |
| 9566  | TMCO1     | 2452.711751 | 0.26911042  | 0.096302 | 2.794438 | 0.005199 | 0.010653 |
| 10764 | TEC       | 73.43197795 | 0.268945409 | 0.113136 | 2.377194 | 0.017445 | 0.031767 |
| 14149 | FLJ22536  | 32.11768263 | 0.268827044 | 0.211393 | 1.271694 | 0.203482 | 0.281889 |
| 13232 | CLK1      | 1939.507657 | 0.268791348 | 0.171263 | 1.569465 | 0.11654  | 0.172634 |
| 12721 | C14orf2   | 921.5241233 | 0.26861969  | 0.155692 | 1.725328 | 0.084468 | 0.13015  |
| 8639  | LINS1     | 260.3199043 | 0.268167947 | 0.08495  | 3.156768 | 0.001595 | 0.00362  |
| 11937 | C17orf103 | 464.6391461 | 0.26816294  | 0.135523 | 1.978729 | 0.047846 | 0.078566 |
| 10817 | CENPBD1   | 251.8788215 | 0.267963561 | 0.113795 | 2.354793 | 0.018533 | 0.033583 |
| 7995  | FARS2     | 235.4523384 | 0.267799558 | 0.078508 | 3.411115 | 0.000647 | 0.001586 |
| 9234  | XPO7      | 1525.676872 | 0.26777757  | 0.091521 | 2.925846 | 0.003435 | 0.007292 |
| 10892 | NSF       | 1133.194927 | 0.267766168 | 0.115276 | 2.322818 | 0.020189 | 0.036328 |
| 14084 | CROCCL2   | 71.0231687  | 0.26772696  | 0.207121 | 1.292614 | 0.196145 | 0.272979 |
| 11063 | C12orf66  | 136.1001824 | 0.267717116 | 0.118007 | 2.268656 | 0.023289 | 0.041263 |
| 10321 | RABGGTB   | 1252.132619 | 0.267528225 | 0.105318 | 2.5402   | 0.011079 | 0.02104  |
| 8743  | CHD8      | 1251.973002 | 0.267388888 | 0.085954 | 3.110838 | 0.001866 | 0.004182 |
| 12846 | CLK4      | 736.0758463 | 0.267356114 | 0.158014 | 1.691975 | 0.090651 | 0.138319 |
| 11945 | RSPRY1    | 484.0766582 | 0.267347323 | 0.135208 | 1.977305 | 0.048007 | 0.078777 |
| 15929 | MUC6      | 10.58640389 | 0.267079121 | 0.36365  | 0.734441 | 0.46268  | 0.569339 |
| 7649  | CREBBP    | 2113.759378 | 0.266929606 | 0.074968 | 3.560595 | 0.00037  | 0.000948 |
| 15065 | PLCB4     | 557.0499114 | 0.266817149 | 0.270434 | 0.986625 | 0.323827 | 0.421329 |
| 11307 | UHRF2     | 642.5125831 | 0.266787985 | 0.122568 | 2.17666  | 0.029506 | 0.051149 |
| 12821 | ARHGAP26  | 1048.640095 | 0.266781027 | 0.157045 | 1.698761 | 0.089364 | 0.136622 |
| 9470  | TTC17     | 1327.547033 | 0.266696432 | 0.094207 | 2.830965 | 0.004641 | 0.009605 |
| 12928 | LDOC1     | 626.7797123 | 0.266651235 | 0.160139 | 1.665123 | 0.095888 | 0.145382 |
| 11582 | NR2F2     | 2502.691084 | 0.266471891 | 0.12758  | 2.08866  | 0.036738 | 0.062175 |
| 11271 | FAM53B    | 1104.94284  | 0.266448588 | 0.121616 | 2.190909 | 0.028458 | 0.049491 |
| 13164 | ASB14     | 9.754755385 | 0.26628293  | 0.167382 | 1.590871 | 0.111639 | 0.166216 |
| 14289 | HECW2     | 611.626812  | 0.266222886 | 0.216038 | 1.232297 | 0.217838 | 0.29882  |
| 12732 | DEXI      | 824.0818385 | 0.266136748 | 0.154501 | 1.722559 | 0.084968 | 0.130809 |
| 13590 | LOC400752 | 28.94352483 | 0.266053725 | 0.182528 | 1.457603 | 0.14495  | 0.209048 |

|       |           |             |             |          |          |          |          |
|-------|-----------|-------------|-------------|----------|----------|----------|----------|
| 11195 | POLR2K    | 916.8930921 | 0.266017016 | 0.119657 | 2.223162 | 0.026205 | 0.045881 |
| 16313 | KLHL33    | 1.205012816 | 0.265791238 | 0.425496 | 0.624662 | 0.532193 | 0.63946  |
| 9748  | LANCL2    | 572.840113  | 0.265770978 | 0.097233 | 2.733337 | 0.00627  | 0.012607 |
| 10964 | MGST3     | 2316.241244 | 0.265764748 | 0.115621 | 2.298585 | 0.021529 | 0.038488 |
| 13798 | TSTD1     | 455.1771455 | 0.265683174 | 0.191557 | 1.386963 | 0.165453 | 0.235037 |
| 9943  | MKRN2     | 489.2429106 | 0.265652656 | 0.099382 | 2.673048 | 0.007517 | 0.014818 |
| 8919  | TTF1      | 272.611228  | 0.265586512 | 0.087245 | 3.044153 | 0.002333 | 0.005128 |
| 11173 | SYAP1     | 1250.830562 | 0.265345513 | 0.118951 | 2.230721 | 0.0257   | 0.045081 |
| 15303 | LPAR1     | 251.436698  | 0.265330332 | 0.288369 | 0.920106 | 0.357517 | 0.45793  |
| 10685 | CCDC50    | 3353.487798 | 0.265258058 | 0.110469 | 2.401193 | 0.016342 | 0.029978 |
| 11261 | ATF7IP    | 1039.197227 | 0.265137054 | 0.120843 | 2.194065 | 0.028231 | 0.049139 |
| 10770 | FAM122B   | 713.2454266 | 0.265127985 | 0.111616 | 2.37535  | 0.017532 | 0.031908 |
| 8696  | STK24     | 2740.572775 | 0.265091639 | 0.08466  | 3.131255 | 0.001741 | 0.003923 |
| 12473 | SFRS18    | 1472.685136 | 0.264771677 | 0.146215 | 1.81084  | 0.070166 | 0.110263 |
| 12543 | DUS4L     | 196.7315711 | 0.264758696 | 0.147651 | 1.793136 | 0.072951 | 0.114001 |
| 13826 | PRICKLE2  | 578.3852981 | 0.26470761  | 0.192349 | 1.376183 | 0.168765 | 0.239257 |
| 11779 | CHD7      | 392.5842952 | 0.264513195 | 0.13041  | 2.028324 | 0.042527 | 0.070768 |
| 7796  | CPSF6     | 1333.30374  | 0.264474    | 0.075505 | 3.502744 | 0.00046  | 0.001158 |
| 15869 | C2orf40   | 45.44307737 | 0.264427318 | 0.351075 | 0.753192 | 0.451334 | 0.557477 |
| 12807 | GALC      | 1185.73532  | 0.264228777 | 0.155236 | 1.702114 | 0.088734 | 0.135807 |
| 9903  | MTR       | 1966.024992 | 0.263874879 | 0.09822  | 2.686557 | 0.007219 | 0.014289 |
| 7494  | HNRNPD    | 3440.149136 | 0.263800732 | 0.072889 | 3.619224 | 0.000295 | 0.000773 |
| 14334 | SPRY1     | 1980.429299 | 0.263763805 | 0.216119 | 1.220457 | 0.222292 | 0.303972 |
| 13692 | FZD3      | 106.3804859 | 0.263632834 | 0.185751 | 1.419278 | 0.155818 | 0.223064 |
| 8166  | METTL2A   | 317.7779522 | 0.263372231 | 0.078701 | 3.346473 | 0.000818 | 0.001965 |
| 14148 | RFTN2     | 109.5195843 | 0.263364369 | 0.207046 | 1.272008 | 0.20337  | 0.281754 |
| 13618 | GATS      | 272.7941324 | 0.263303318 | 0.181665 | 1.449391 | 0.147228 | 0.211913 |
| 8839  | VPS24     | 2534.704729 | 0.263280542 | 0.08563  | 3.074616 | 0.002108 | 0.004674 |
| 13695 | RHOBTB1   | 1596.884758 | 0.263204919 | 0.185501 | 1.418888 | 0.155932 | 0.223178 |
| 15197 | DC1001314 | 49.02277418 | 0.263118961 | 0.277263 | 0.948987 | 0.342627 | 0.441919 |
| 16163 | LOC285733 | 39.18777655 | 0.263021945 | 0.39646  | 0.663426 | 0.507058 | 0.614913 |
| 9493  | NPEPPS    | 2265.964701 | 0.262982206 | 0.093218 | 2.82115  | 0.004785 | 0.00988  |
| 11642 | PGCP      | 1591.130016 | 0.262973693 | 0.127446 | 2.06342  | 0.039073 | 0.065785 |
| 15022 | C9orf68   | 75.55183174 | 0.262923871 | 0.262626 | 1.001135 | 0.316762 | 0.413317 |
| 13759 | STL       | 4.634709878 | 0.262904032 | 0.18759  | 1.40148  | 0.161071 | 0.22946  |
| 16165 | EPX       | 1.025197408 | 0.262854672 | 0.396374 | 0.663147 | 0.507236 | 0.615053 |
| 9351  | NCOA6     | 1302.767309 | 0.262850558 | 0.091303 | 2.878877 | 0.003991 | 0.008365 |
| 14798 | NLRP9     | 6.74944228  | 0.262742407 | 0.246552 | 1.065669 | 0.286573 | 0.379587 |
| 12122 | PIGX      | 665.2476421 | 0.262660918 | 0.136677 | 1.921761 | 0.054636 | 0.088345 |
| 14400 | MORN1     | 89.7880351  | 0.262620638 | 0.219263 | 1.19774  | 0.231018 | 0.314458 |
| 15657 | STEAP1    | 123.3116817 | 0.262611153 | 0.320235 | 0.820057 | 0.412184 | 0.516013 |
| 9146  | TUBGCP3   | 470.0329763 | 0.262490771 | 0.088678 | 2.960044 | 0.003076 | 0.006592 |
| 9271  | VPS37C    | 595.9371383 | 0.262305736 | 0.090184 | 2.908567 | 0.003631 | 0.007677 |
| 14723 | HNF1A     | 706.6753297 | 0.262207716 | 0.240352 | 1.090931 | 0.275303 | 0.366516 |
| 13360 | PLEKHG1   | 711.9106867 | 0.262201774 | 0.172161 | 1.523001 | 0.127759 | 0.18744  |
| 11355 | EID2B     | 65.20453018 | 0.262160632 | 0.121093 | 2.164956 | 0.030391 | 0.052456 |
| 9893  | ZNF35     | 116.7162794 | 0.261799736 | 0.097311 | 2.690351 | 0.007138 | 0.014142 |

|       |           |             |             |          |          |          |          |
|-------|-----------|-------------|-------------|----------|----------|----------|----------|
| 14179 | SNHG10    | 54.98168694 | 0.261796977 | 0.207239 | 1.263259 | 0.206496 | 0.28546  |
| 9280  | ZCCHC4    | 181.1950125 | 0.261706804 | 0.090043 | 2.906465 | 0.003655 | 0.007721 |
| 13451 | CRTC1     | 322.1082867 | 0.261645926 | 0.174257 | 1.501494 | 0.133228 | 0.194136 |
| 14093 | SLC22A5   | 1876.789655 | 0.26160014  | 0.202828 | 1.289766 | 0.197132 | 0.274177 |
| 13148 | NUDT9P1   | 6.419789574 | 0.261337925 | 0.163813 | 1.595343 | 0.110636 | 0.164925 |
| 9710  | KIAA0430  | 2022.99797  | 0.261326694 | 0.095211 | 2.744713 | 0.006056 | 0.012226 |
| 12685 | SNX7      | 842.1390137 | 0.261163747 | 0.14989  | 1.742365 | 0.081445 | 0.125849 |
| 15569 | ALPK2     | 1829.757927 | 0.261141382 | 0.309908 | 0.842641 | 0.399429 | 0.502868 |
| 11345 | ZNF563    | 81.05829438 | 0.260990997 | 0.120416 | 2.167411 | 0.030204 | 0.052183 |
| 14674 | PLSCR4    | 803.6504263 | 0.260868242 | 0.235145 | 1.109391 | 0.267261 | 0.356998 |
| 14543 | SLC40A1   | 5172.099391 | 0.260626184 | 0.226072 | 1.152846 | 0.248974 | 0.335566 |
| 10973 | NFE2L1    | 12050.41435 | 0.260565802 | 0.11349  | 2.295942 | 0.021679 | 0.038725 |
| 13986 | PER1      | 2536.010804 | 0.260487087 | 0.196783 | 1.323729 | 0.185593 | 0.260122 |
| 8965  | BCCIP     | 1000.06079  | 0.260313323 | 0.086057 | 3.024891 | 0.002487 | 0.005438 |
| 18012 | PGA4      | 0.736944411 | 0.260305866 | 1.27935  | 0.203467 | 0.83877  | 0.912703 |
| 12115 | SLC41A3   | 787.8804174 | 0.260245613 | 0.135318 | 1.923209 | 0.054454 | 0.088096 |
| 13851 | SPAG8     | 25.49600988 | 0.260209383 | 0.19016  | 1.368368 | 0.171197 | 0.242266 |
| 13263 | CEP70     | 382.4848763 | 0.260187936 | 0.166812 | 1.559764 | 0.118816 | 0.175594 |
| 12704 | HOOK3     | 1351.513255 | 0.260162237 | 0.150133 | 1.732876 | 0.083118 | 0.128242 |
| 15212 | HIST1H4H  | 145.6012228 | 0.259938638 | 0.275227 | 0.944452 | 0.344939 | 0.444461 |
| 7767  | LOC65125C | 1806.909282 | 0.259831206 | 0.074024 | 3.510115 | 0.000448 | 0.00113  |
| 11060 | TBK1      | 737.7470448 | 0.259741892 | 0.114405 | 2.270375 | 0.023185 | 0.041089 |
| 11160 | RNF2      | 579.5654198 | 0.259534142 | 0.116178 | 2.23394  | 0.025487 | 0.044764 |
| 16015 | PCOLCE2   | 1112.402627 | 0.25949042  | 0.366808 | 0.707428 | 0.4793   | 0.586623 |
| 13740 | PER2      | 953.2941403 | 0.259336271 | 0.18461  | 1.404779 | 0.160087 | 0.228375 |
| 14290 | OC1002717 | 35.11222716 | 0.259307553 | 0.21044  | 1.232217 | 0.217868 | 0.29884  |
| 12418 | DMXL2     | 849.8798079 | 0.259108459 | 0.141556 | 1.830435 | 0.067185 | 0.106047 |
| 10519 | FAM120C   | 309.2759055 | 0.25906752  | 0.105134 | 2.464162 | 0.013733 | 0.025591 |
| 11027 | ZNF224    | 254.4253786 | 0.258957863 | 0.113526 | 2.281048 | 0.022546 | 0.040076 |
| 14055 | TPI1P2    | 16.52492271 | 0.258685666 | 0.198954 | 1.300227 | 0.193523 | 0.269886 |
| 15359 | GPER      | 635.3805995 | 0.258543628 | 0.286322 | 0.902981 | 0.366536 | 0.467769 |
| 9220  | GNL3L     | 583.5649725 | 0.258470369 | 0.088215 | 2.930008 | 0.00339  | 0.007205 |
| 15573 | LOC221442 | 46.04211789 | 0.258367263 | 0.306754 | 0.842261 | 0.399642 | 0.503023 |
| 9297  | SEC16A    | 2201.226507 | 0.258217057 | 0.089003 | 2.901201 | 0.003717 | 0.007837 |
| 10841 | ZSCAN21   | 223.7835832 | 0.258149212 | 0.110133 | 2.343971 | 0.01908  | 0.034497 |
| 10537 | IPO5      | 3188.452545 | 0.258148998 | 0.105065 | 2.457048 | 0.014008 | 0.026058 |
| 11475 | ZNF616    | 191.1421377 | 0.258091501 | 0.121282 | 2.128021 | 0.033335 | 0.056942 |
| 9268  | LGALS8    | 1031.189251 | 0.257657604 | 0.088513 | 2.910974 | 0.003603 | 0.00762  |
| 11242 | OSGEPL1   | 202.8775481 | 0.257612581 | 0.116962 | 2.202529 | 0.027628 | 0.048171 |
| 16177 | HIST1H2BC | 0.861548848 | 0.257600933 | 0.390038 | 0.660451 | 0.508964 | 0.616691 |
| 10993 | UBE3C     | 1887.338601 | 0.257494428 | 0.112443 | 2.28999  | 0.022022 | 0.039269 |
| 10699 | WDR12     | 403.7011787 | 0.257372163 | 0.107335 | 2.397851 | 0.016492 | 0.030213 |
| 10460 | PRPF8     | 5892.768153 | 0.257221531 | 0.103318 | 2.489603 | 0.012789 | 0.023965 |
| 16483 | RBM11     | 14.47256389 | 0.257160578 | 0.446171 | 0.576373 | 0.564363 | 0.671121 |
| 10161 | UBE2N     | 1916.057867 | 0.257053419 | 0.099049 | 2.595226 | 0.009453 | 0.018235 |
| 14382 | ADAMTS5   | 750.9597888 | 0.25695789  | 0.213658 | 1.20266  | 0.229108 | 0.312248 |
| 11081 | TANK      | 857.9089235 | 0.256816742 | 0.113487 | 2.262954 | 0.023639 | 0.041814 |

|       |           |             |             |          |          |          |          |
|-------|-----------|-------------|-------------|----------|----------|----------|----------|
| 11589 | TMED4     | 1700.51118  | 0.256710875 | 0.123194 | 2.083802 | 0.037178 | 0.062881 |
| 9284  | SUPT16H   | 1990.822609 | 0.256616244 | 0.088316 | 2.905658 | 0.003665 | 0.007737 |
| 9330  | CALM1     | 9074.194902 | 0.256597346 | 0.08887  | 2.887331 | 0.003885 | 0.008162 |
| 8125  | ATXN10    | 1742.763537 | 0.256579682 | 0.076356 | 3.36032  | 0.000779 | 0.001878 |
| 10740 | PPP3CB    | 995.0665188 | 0.25657207  | 0.10763  | 2.383838 | 0.017133 | 0.031269 |
| 8606  | BRD7      | 1064.410392 | 0.256384579 | 0.080796 | 3.173243 | 0.001507 | 0.003433 |
| 11730 | METT11D1  | 581.9315873 | 0.256365533 | 0.125503 | 2.042698 | 0.041082 | 0.068649 |
| 14089 | LNPEP     | 386.6390285 | 0.256342325 | 0.19849  | 1.291464 | 0.196543 | 0.273436 |
| 11631 | EIF4B     | 11018.2502  | 0.256044313 | 0.123808 | 2.06807  | 0.038633 | 0.06511  |
| 10650 | MLL       | 1826.593602 | 0.25599074  | 0.10604  | 2.414104 | 0.015774 | 0.029031 |
| 11165 | UBTD2     | 712.991941  | 0.25597985  | 0.114637 | 2.232959 | 0.025552 | 0.044858 |
| 13144 | C9orf72   | 302.3709969 | 0.255904504 | 0.160328 | 1.596135 | 0.110459 | 0.164722 |
| 15244 | ALS2CR12  | 3.539831118 | 0.255859364 | 0.273781 | 0.93454  | 0.350026 | 0.450039 |
| 14923 | IL18      | 698.1461543 | 0.255805448 | 0.248434 | 1.029672 | 0.303164 | 0.398199 |
| 11419 | ARL6IP1   | 5563.83841  | 0.255487749 | 0.119253 | 2.142399 | 0.032161 | 0.055206 |
| 13650 | ATP8B1    | 540.7772003 | 0.255206823 | 0.177506 | 1.437737 | 0.150509 | 0.21611  |
| 14958 | PRKG1     | 145.8667888 | 0.255163033 | 0.249943 | 1.020883 | 0.30731  | 0.4027   |
| 10287 | ERCC8     | 174.2585958 | 0.255119839 | 0.100036 | 2.550288 | 0.010763 | 0.020509 |
| 12951 | OSBPL10   | 852.3497327 | 0.255104431 | 0.153896 | 1.657645 | 0.097389 | 0.147396 |
| 10958 | SRPK1     | 723.9737161 | 0.255085178 | 0.110847 | 2.301244 | 0.021378 | 0.038242 |
| 10056 | GORASP1   | 737.0003595 | 0.254915332 | 0.096805 | 2.633276 | 0.008457 | 0.016483 |
| 10819 | CDC27     | 1486.775434 | 0.254802492 | 0.10822  | 2.354485 | 0.018548 | 0.033601 |
| 11456 | COQ4      | 783.1824672 | 0.254798243 | 0.119476 | 2.13263  | 0.032955 | 0.056385 |
| 10260 | NAE1      | 711.9856884 | 0.254751703 | 0.099426 | 2.562214 | 0.010401 | 0.01987  |
| 11357 | ZNF816A   | 176.688402  | 0.254544764 | 0.117595 | 2.164597 | 0.030419 | 0.052499 |
| 10943 | C9orf6    | 343.8014858 | 0.254437734 | 0.110346 | 2.305812 | 0.021121 | 0.037832 |
| 14828 | FAM27C    | 30.87278896 | 0.254384531 | 0.240596 | 1.05731  | 0.29037  | 0.383838 |
| 13702 | USP49     | 13.59093669 | 0.254359383 | 0.179449 | 1.417449 | 0.156352 | 0.223665 |
| 10076 | IRF2BP2   | 4409.165589 | 0.254260747 | 0.096796 | 2.626764 | 0.00862  | 0.016769 |
| 14710 | C17orf107 | 127.904135  | 0.254226542 | 0.232201 | 1.094858 | 0.273579 | 0.364543 |
| 15316 | PRICKLE4  | 87.54264467 | 0.254193589 | 0.277092 | 0.91736  | 0.358954 | 0.459379 |
| 9499  | MAP3K7    | 581.8992107 | 0.253917189 | 0.090037 | 2.820128 | 0.0048   | 0.009906 |
| 12934 | PISD      | 781.3001697 | 0.253807847 | 0.152531 | 1.663972 | 0.096118 | 0.145663 |
| 12140 | TATDN1    | 309.1841961 | 0.253551835 | 0.13237  | 1.915471 | 0.055432 | 0.0895   |
| 15590 | LOC283174 | 85.43209964 | 0.253538685 | 0.3026   | 0.837867 | 0.402105 | 0.505559 |
| 11196 | CSNK2A1   | 1474.974511 | 0.253148913 | 0.113873 | 2.223073 | 0.026211 | 0.045888 |
| 16391 | GLRB      | 77.49833731 | 0.253053916 | 0.419944 | 0.60259  | 0.546782 | 0.653823 |
| 10927 | ADNP      | 2053.127548 | 0.252657306 | 0.109356 | 2.310406 | 0.020866 | 0.037429 |
| 8762  | MED4      | 822.4094047 | 0.252570915 | 0.081434 | 3.101551 | 0.001925 | 0.004307 |
| 14843 | SLC43A1   | 146.7448346 | 0.252506112 | 0.239675 | 1.053536 | 0.292095 | 0.385728 |
| 9948  | TFDP1     | 1013.201966 | 0.252457545 | 0.094481 | 2.672058 | 0.007539 | 0.014854 |
| 10887 | C3orf63   | 1519.236961 | 0.252203664 | 0.108524 | 2.323939 | 0.020129 | 0.03624  |
| 16541 | LOC440563 | 0.612863512 | 0.252075615 | 0.448438 | 0.562119 | 0.574035 | 0.680226 |
| 10552 | TSPAN14   | 3024.370144 | 0.252067874 | 0.102779 | 2.452528 | 0.014186 | 0.026351 |
| 9100  | RBM39     | 3670.484077 | 0.252043094 | 0.084684 | 2.976275 | 0.002918 | 0.006285 |
| 10701 | PSMD6     | 937.846201  | 0.251959996 | 0.105111 | 2.397089 | 0.016526 | 0.03027  |
| 11197 | DCTN3     | 777.7958783 | 0.251944542 | 0.113364 | 2.222431 | 0.026254 | 0.045959 |

|       |           |             |             |          |          |          |          |
|-------|-----------|-------------|-------------|----------|----------|----------|----------|
| 9137  | SEPHS1    | 997.9992079 | 0.251903538 | 0.084995 | 2.963732 | 0.003039 | 0.00652  |
| 14170 | RAB9B     | 9.783237085 | 0.251728143 | 0.19894  | 1.26535  | 0.205746 | 0.284603 |
| 14998 | RSPH4A    | 10.03834493 | 0.251717196 | 0.249796 | 1.007689 | 0.313604 | 0.409851 |
| 13297 | DC1001255 | 45.40281538 | 0.251708898 | 0.163056 | 1.5437   | 0.122661 | 0.180814 |
| 15498 | C20orf26  | 3.399525593 | 0.251696078 | 0.291966 | 0.862072 | 0.388648 | 0.49154  |
| 12443 | QSER1     | 960.0776899 | 0.251656125 | 0.138048 | 1.822958 | 0.06831  | 0.107606 |
| 15068 | UNC5CL    | 493.5220505 | 0.251606899 | 0.255192 | 0.985952 | 0.324157 | 0.421675 |
| 16934 | CR2       | 14.35761208 | 0.251590385 | 0.553471 | 0.454569 | 0.64942  | 0.751699 |
| 14892 | BHMT2     | 3921.569781 | 0.251480318 | 0.24205  | 1.03896  | 0.298823 | 0.393314 |
| 9571  | ZNF20     | 114.0342516 | 0.251074277 | 0.089943 | 2.791484 | 0.005247 | 0.010745 |
| 15284 | DSCAML1   | 256.8741625 | 0.251059745 | 0.271424 | 0.924972 | 0.354981 | 0.455246 |
| 11640 | ATAD2B    | 284.2871523 | 0.251032075 | 0.121622 | 2.06403  | 0.039015 | 0.065698 |
| 16290 | ADCY2     | 55.45348961 | 0.25093452  | 0.398153 | 0.630247 | 0.528533 | 0.63596  |
| 11759 | C11orf95  | 580.1233276 | 0.25083283  | 0.123258 | 2.035021 | 0.041849 | 0.069763 |
| 14050 | DLEU2L    | 5.357760375 | 0.250803796 | 0.192823 | 1.300698 | 0.193362 | 0.269736 |
| 12687 | HSPA8     | 20739.7563  | 0.250687152 | 0.143906 | 1.742022 | 0.081505 | 0.125922 |
| 9336  | TAF8      | 415.5478858 | 0.250602097 | 0.086886 | 2.884247 | 0.003924 | 0.008237 |
| 11445 | VPS41     | 1385.914181 | 0.250533328 | 0.117294 | 2.135935 | 0.032685 | 0.055977 |
| 8556  | RSRC2     | 1308.335618 | 0.250513912 | 0.078589 | 3.187658 | 0.001434 | 0.003286 |
| 14720 | ZNF732    | 3.917559665 | 0.250384731 | 0.229201 | 1.092425 | 0.274646 | 0.36573  |
| 16792 | ZFP57     | 17.04610857 | 0.250368547 | 0.509498 | 0.491403 | 0.623142 | 0.727339 |
| 13441 | TMEM123   | 8326.444608 | 0.250225052 | 0.166503 | 1.502822 | 0.132885 | 0.193786 |
| 9185  | N4BP1     | 1063.800776 | 0.25010646  | 0.084924 | 2.945047 | 0.003229 | 0.006891 |
| 12884 | PDXP      | 366.4686636 | 0.250090937 | 0.148989 | 1.678582 | 0.093234 | 0.14184  |
| 12727 | RP2       | 739.4390621 | 0.249905387 | 0.144981 | 1.723712 | 0.08476  | 0.130529 |
| 8321  | TRIM39    | 410.0544516 | 0.249734375 | 0.076063 | 3.283246 | 0.001026 | 0.002417 |
| 11630 | C3orf31   | 108.356656  | 0.249712935 | 0.120747 | 2.068076 | 0.038633 | 0.06511  |
| 13723 | MYO19     | 675.1147108 | 0.249651358 | 0.177046 | 1.41009  | 0.158513 | 0.226409 |
| 15182 | PYGM      | 85.16196307 | 0.249615687 | 0.261955 | 0.952895 | 0.340643 | 0.439794 |
| 11782 | POMT1     | 651.3994907 | 0.249551252 | 0.123051 | 2.028039 | 0.042556 | 0.070798 |
| 13847 | PSIMCT-1  | 11.23760377 | 0.249520212 | 0.182261 | 1.36903  | 0.17099  | 0.24205  |
| 10409 | UTP15     | 251.4271791 | 0.249380986 | 0.099479 | 2.506876 | 0.01218  | 0.022937 |
| 12962 | ANKRD32   | 165.7113506 | 0.249198081 | 0.150667 | 1.653971 | 0.098134 | 0.148396 |
| 13009 | CCNL1     | 1276.439978 | 0.249138891 | 0.151832 | 1.64088  | 0.100822 | 0.151912 |
| 11149 | FKRP      | 306.3203828 | 0.249137801 | 0.111355 | 2.237321 | 0.025265 | 0.044419 |
| 15184 | SGPP2     | 347.8896679 | 0.249024612 | 0.261512 | 0.952251 | 0.34097  | 0.440129 |
| 9993  | DDX6      | 3239.947762 | 0.248938124 | 0.093789 | 2.654234 | 0.007949 | 0.015591 |
| 9283  | GGPS1     | 727.9548529 | 0.248936468 | 0.085664 | 2.905966 | 0.003661 | 0.007731 |
| 10374 | LRRC37B2  | 534.5141062 | 0.248750343 | 0.098921 | 2.514626 | 0.011916 | 0.022514 |
| 14974 | AMACR     | 2938.088119 | 0.248706206 | 0.245001 | 1.015123 | 0.310047 | 0.405852 |
| 12829 | IPO7      | 4151.252573 | 0.248617562 | 0.146629 | 1.695558 | 0.08997  | 0.137462 |
| 9486  | EPN2      | 755.39849   | 0.248609014 | 0.088066 | 2.822999 | 0.004758 | 0.009831 |
| 7526  | SUDS3     | 927.0380972 | 0.248551652 | 0.068931 | 3.60578  | 0.000311 | 0.000811 |
| 16045 | DLGAP2    | 6.407877972 | 0.248504664 | 0.355885 | 0.698272 | 0.485007 | 0.592516 |
| 8733  | RPRD1B    | 783.5408372 | 0.24848774  | 0.079758 | 3.115524 | 0.001836 | 0.004121 |
| 12521 | AMMECR1   | 336.4477707 | 0.248435057 | 0.138206 | 1.797573 | 0.072245 | 0.113095 |
| 12441 | NDUFC1    | 1376.450254 | 0.248265951 | 0.136097 | 1.824184 | 0.068124 | 0.107331 |

|       |           |             |             |          |          |          |          |
|-------|-----------|-------------|-------------|----------|----------|----------|----------|
| 15772 | BAALC     | 129.3658246 | 0.248231472 | 0.316708 | 0.783786 | 0.433166 | 0.538295 |
| 7880  | ZNF317    | 697.9090788 | 0.248156107 | 0.071749 | 3.458659 | 0.000543 | 0.00135  |
| 14248 | TXNRD2    | 505.5251003 | 0.248009332 | 0.199587 | 1.242614 | 0.21401  | 0.294414 |
| 11334 | ZNF621    | 556.2621267 | 0.247895668 | 0.11424  | 2.169958 | 0.03001  | 0.051899 |
| 13818 | FHIT      | 82.6811985  | 0.247785229 | 0.179568 | 1.379897 | 0.167618 | 0.237765 |
| 9244  | NKRF      | 322.3304004 | 0.247747754 | 0.084827 | 2.920624 | 0.003493 | 0.007407 |
| 15501 | CRISPLD1  | 87.99345063 | 0.247540468 | 0.287685 | 0.860456 | 0.389538 | 0.49257  |
| 15916 | CTSK      | 680.055708  | 0.247427005 | 0.335791 | 0.736848 | 0.461215 | 0.567999 |
| 10812 | BAT1      | 4011.708419 | 0.247340495 | 0.104888 | 2.358144 | 0.018367 | 0.033297 |
| 13142 | ZNF248    | 555.6189203 | 0.247276126 | 0.154894 | 1.596418 | 0.110395 | 0.164652 |
| 9481  | FAM21C    | 1504.158351 | 0.247222316 | 0.087495 | 2.825549 | 0.00472  | 0.009758 |
| 8894  | PRKAG1    | 1229.069701 | 0.2472115   | 0.080937 | 3.054376 | 0.002255 | 0.00497  |
| 10642 | RBBP4     | 3075.099722 | 0.247180055 | 0.102245 | 2.417524 | 0.015627 | 0.028782 |
| 16833 | LRRC67    | 1.337718027 | 0.246949743 | 0.512458 | 0.481893 | 0.629882 | 0.733459 |
| 10449 | SLC35B3   | 520.4281977 | 0.24693606  | 0.098975 | 2.494938 | 0.012598 | 0.023632 |
| 14472 | IPMK      | 79.15732707 | 0.246926666 | 0.209968 | 1.176021 | 0.239587 | 0.324498 |
| 16023 | INE2      | 16.38716951 | 0.246878163 | 0.350854 | 0.703649 | 0.481651 | 0.589206 |
| 12605 | GUSBL2    | 79.46557635 | 0.246644944 | 0.139288 | 1.770756 | 0.076601 | 0.119116 |
| 10521 | ZNF84     | 793.5810358 | 0.246511122 | 0.100071 | 2.463372 | 0.013764 | 0.025642 |
| 9980  | ZNF131    | 447.9319239 | 0.246261029 | 0.092602 | 2.659339 | 0.007829 | 0.015377 |
| 13880 | RNF125    | 228.9165731 | 0.246200727 | 0.181728 | 1.354773 | 0.17549  | 0.247823 |
| 14854 | LOC442421 | 10.40729021 | 0.246073454 | 0.23406  | 1.051324 | 0.29311  | 0.386778 |
| 15882 | NPY5R     | 13.721054   | 0.245851212 | 0.328459 | 0.748498 | 0.45416  | 0.560508 |
| 8486  | GPBP1     | 2121.392809 | 0.245808187 | 0.076517 | 3.212474 | 0.001316 | 0.00304  |
| 13756 | HS6ST1    | 877.4689735 | 0.245675595 | 0.175248 | 1.401878 | 0.160952 | 0.229324 |
| 9926  | RPAIN     | 473.2262887 | 0.245563381 | 0.091682 | 2.678433 | 0.007397 | 0.014605 |
| 11354 | SEC63     | 2164.8222   | 0.245481199 | 0.113382 | 2.165086 | 0.030381 | 0.052448 |
| 16372 | TPTE      | 0.921306249 | 0.245320659 | 0.40371  | 0.607666 | 0.543409 | 0.650584 |
| 14713 | MYH10     | 1748.09102  | 0.245191619 | 0.224224 | 1.093512 | 0.274169 | 0.365254 |
| 14488 | KIAA1377  | 252.6849755 | 0.245136448 | 0.209085 | 1.172425 | 0.241026 | 0.326088 |
| 12535 | IMMP2L    | 265.2264556 | 0.245094004 | 0.136578 | 1.794531 | 0.072728 | 0.113726 |
| 11667 | MAP1LC3B  | 317.4631302 | 0.245028402 | 0.119053 | 2.058149 | 0.039576 | 0.066489 |
| 12301 | RYBP      | 1362.891031 | 0.244987113 | 0.13138  | 1.864721 | 0.062221 | 0.099145 |
| 9544  | ELF2      | 677.2608056 | 0.244852102 | 0.087372 | 2.802401 | 0.005072 | 0.010416 |
| 12941 | C6orf225  | 264.0662481 | 0.244827652 | 0.147308 | 1.662009 | 0.096511 | 0.14618  |
| 11658 | DR1       | 1148.492968 | 0.244813902 | 0.11888  | 2.059333 | 0.039462 | 0.066349 |
| 9497  | RBM8A     | 1732.526304 | 0.24479199  | 0.086791 | 2.820482 | 0.004795 | 0.009897 |
| 9786  | FN3KRP    | 886.9412044 | 0.244709722 | 0.089944 | 2.720686 | 0.006515 | 0.01305  |
| 10550 | TUBGCP5   | 321.6102324 | 0.244567726 | 0.099716 | 2.452645 | 0.014181 | 0.026347 |
| 11509 | C1QBP     | 1391.914441 | 0.244535372 | 0.115749 | 2.112636 | 0.034632 | 0.058982 |
| 12046 | ZSWIM7    | 290.715512  | 0.244515913 | 0.125679 | 1.945557 | 0.051708 | 0.084139 |
| 14004 | LOC400927 | 24.25802892 | 0.244515706 | 0.185658 | 1.317022 | 0.187831 | 0.262902 |
| 14882 | APBA1     | 158.9038562 | 0.244448933 | 0.234417 | 1.042795 | 0.297043 | 0.391234 |
| 11257 | CYLD      | 1648.788276 | 0.244381642 | 0.111208 | 2.197519 | 0.027983 | 0.048724 |
| 7931  | ECD       | 566.0912389 | 0.244218477 | 0.07109  | 3.435347 | 0.000592 | 0.001462 |
| 15127 | CCNJL     | 270.1033388 | 0.244116415 | 0.252864 | 0.965406 | 0.334341 | 0.433227 |
| 9337  | PRPF38A   | 731.1900027 | 0.244063926 | 0.084628 | 2.883977 | 0.003927 | 0.008244 |



|       |           |             |             |          |          |          |          |
|-------|-----------|-------------|-------------|----------|----------|----------|----------|
| 11163 | CASP7     | 689.1801197 | 0.243981092 | 0.109252 | 2.233199 | 0.025536 | 0.044838 |
| 9192  | GFOD2     | 618.4411406 | 0.243935952 | 0.082913 | 2.942059 | 0.00326  | 0.006952 |
| 16467 | DOK7      | 20.22564492 | 0.243738663 | 0.418774 | 0.582029 | 0.560547 | 0.667208 |
| 11690 | ZNF449    | 223.165686  | 0.243679509 | 0.118666 | 2.053488 | 0.040025 | 0.067112 |
| 14201 | ITGA2     | 890.5083593 | 0.243644867 | 0.193941 | 1.256286 | 0.209012 | 0.28849  |
| 14254 | CYP46A1   | 49.45336723 | 0.243259142 | 0.195951 | 1.241426 | 0.214448 | 0.294872 |
| 6504  | TMEM199   | 422.1317086 | 0.242796963 | 0.06031  | 4.025799 | 5.68E-05 | 0.000171 |
| 12105 | POLH      | 733.9288491 | 0.242749983 | 0.125923 | 1.92776  | 0.053885 | 0.087253 |
| 11612 | ZNF419    | 163.4259242 | 0.242703668 | 0.116846 | 2.077127 | 0.03779  | 0.063789 |
| 17301 | TEPP      | 1.28093753  | 0.242559227 | 0.661418 | 0.366726 | 0.713823 | 0.808719 |
| 15574 | AMPH      | 12.0498317  | 0.242532623 | 0.287986 | 0.842169 | 0.399693 | 0.503043 |
| 13797 | LOC44094  | 165.9818515 | 0.242490176 | 0.174767 | 1.387507 | 0.165287 | 0.234829 |
| 13732 | CYC1      | 2640.888879 | 0.242469721 | 0.172357 | 1.40679  | 0.15949  | 0.227655 |
| 9332  | EIF4G3    | 1544.202515 | 0.242432523 | 0.08399  | 2.886434 | 0.003896 | 0.008184 |
| 15194 | SAMD13    | 13.75110868 | 0.242219692 | 0.254952 | 0.95006  | 0.342082 | 0.441302 |
| 12311 | KLHL22    | 490.2835497 | 0.242113059 | 0.130086 | 1.861177 | 0.062719 | 0.099859 |
| 13325 | ANKRD50   | 779.737651  | 0.24208255  | 0.157751 | 1.534587 | 0.124885 | 0.183693 |
| 13102 | ENOX2     | 280.4352096 | 0.242069009 | 0.15034  | 1.610148 | 0.107366 | 0.160622 |
| 9718  | SET       | 5070.608378 | 0.242009857 | 0.088231 | 2.742917 | 0.00609  | 0.012283 |
| 10576 | SNRNP27   | 619.0990377 | 0.241897181 | 0.098958 | 2.444442 | 0.014508 | 0.026888 |
| 12538 | ITF2IRD2P | 233.2212715 | 0.241820874 | 0.134803 | 1.793882 | 0.072832 | 0.11386  |
| 14258 | ANXA4     | 15617.44613 | 0.241655712 | 0.19476  | 1.240789 | 0.214684 | 0.295113 |
| 13653 | CDK19     | 986.1217463 | 0.241630033 | 0.168103 | 1.437391 | 0.150607 | 0.21622  |
| 16412 | ANXA3     | 197.85015   | 0.241598418 | 0.403349 | 0.598981 | 0.549185 | 0.655801 |
| 12295 | TSR2      | 987.6952727 | 0.241582694 | 0.129375 | 1.867305 | 0.061859 | 0.098617 |
| 12708 | RAP2C     | 920.3519163 | 0.241576219 | 0.139641 | 1.729983 | 0.083633 | 0.128997 |
| 11335 | NUCKS1    | 7292.746562 | 0.241505328 | 0.11131  | 2.169672 | 0.030032 | 0.051932 |
| 13499 | PDGFC     | 897.6744337 | 0.241489775 | 0.162168 | 1.489133 | 0.136452 | 0.198133 |
| 15493 | FAM71E1   | 33.79635369 | 0.241371327 | 0.279374 | 0.863973 | 0.387603 | 0.490376 |
| 8571  | HNRNPU    | 8436.01502  | 0.241327571 | 0.075828 | 3.182558 | 0.00146  | 0.003338 |
| 9732  | SRRM1     | 1423.253777 | 0.241309883 | 0.08814  | 2.737796 | 0.006185 | 0.012458 |
| 10543 | ATP5C1    | 3826.901854 | 0.241285034 | 0.098292 | 2.454777 | 0.014097 | 0.026209 |
| 11898 | EIF2C4    | 284.9435428 | 0.241169953 | 0.121254 | 1.98896  | 0.046706 | 0.076944 |
| 10404 | C10orf84  | 685.1745709 | 0.241129678 | 0.096152 | 2.507798 | 0.012149 | 0.022888 |
| 10757 | UBP1      | 971.5442316 | 0.240939811 | 0.101275 | 2.379067 | 0.017357 | 0.031626 |
| 12276 | NDUFV2    | 1919.120546 | 0.240846551 | 0.128617 | 1.872594 | 0.061124 | 0.097597 |
| 8811  | MAPKAPK   | 475.4170199 | 0.240427367 | 0.077969 | 3.083637 | 0.002045 | 0.004549 |
| 15495 | ABCC6     | 717.3775797 | 0.240415392 | 0.278522 | 0.863182 | 0.388037 | 0.490863 |
| 8203  | MBD1      | 926.4478218 | 0.240372507 | 0.07216  | 3.331121 | 0.000865 | 0.002067 |
| 10689 | SSB       | 1781.172244 | 0.240311258 | 0.100097 | 2.400788 | 0.01636  | 0.03     |
| 16510 | FAM189A1  | 93.64552393 | 0.240295123 | 0.421998 | 0.569423 | 0.569069 | 0.67561  |
| 12810 | C5orf54   | 229.7135608 | 0.240275922 | 0.141209 | 1.701565 | 0.088837 | 0.135932 |
| 13967 | MEF2C     | 1787.793291 | 0.240274605 | 0.18069  | 1.329763 | 0.183596 | 0.25767  |
| 10652 | TPR       | 2610.535309 | 0.240263848 | 0.099564 | 2.413172 | 0.015814 | 0.029099 |
| 10123 | MAP3K4    | 506.321945  | 0.239922758 | 0.092013 | 2.607481 | 0.009121 | 0.017661 |
| 10945 | SMC1A     | 2057.520506 | 0.239887186 | 0.104051 | 2.305466 | 0.02114  | 0.03786  |
| 7121  | ZDHHC5    | 2676.092845 | 0.23988682  | 0.063502 | 3.777626 | 0.000158 | 0.000436 |

|       |           |             |             |          |          |          |          |
|-------|-----------|-------------|-------------|----------|----------|----------|----------|
| 15199 | ERBB3     | 3775.774199 | 0.239883927 | 0.253098 | 0.947791 | 0.343236 | 0.442646 |
| 9632  | MED28     | 501.6437176 | 0.239821017 | 0.086612 | 2.768906 | 0.005624 | 0.011446 |
| 15136 | GPT2      | 647.6668582 | 0.239652324 | 0.24867  | 0.963737 | 0.335178 | 0.434084 |
| 15143 | ANGPT2    | 2760.332041 | 0.239645163 | 0.249147 | 0.961863 | 0.336119 | 0.43507  |
| 14520 | CAV2      | 4040.132279 | 0.23945969  | 0.206337 | 1.160526 | 0.245835 | 0.33186  |
| 16769 | UGT2B15   | 1.49289866  | 0.239342475 | 0.48011  | 0.498515 | 0.618121 | 0.722511 |
| 11048 | UBB       | 12952.7245  | 0.238955219 | 0.10507  | 2.274246 | 0.022951 | 0.040719 |
| 12036 | NME7      | 283.3909765 | 0.238954972 | 0.122594 | 1.949157 | 0.051277 | 0.083506 |
| 9213  | C8orf41   | 227.973017  | 0.23873165  | 0.081369 | 2.933933 | 0.003347 | 0.007121 |
| 14252 | NHS       | 601.9340144 | 0.238658858 | 0.192192 | 1.241775 | 0.21432  | 0.294736 |
| 9503  | C9orf78   | 1281.72774  | 0.238562734 | 0.084611 | 2.819516 | 0.00481  | 0.00992  |
| 16452 | TNNC2     | 3.803131293 | 0.238489398 | 0.406731 | 0.586357 | 0.557636 | 0.66437  |
| 11569 | UPF2      | 702.120073  | 0.238439851 | 0.113934 | 2.092789 | 0.036368 | 0.061617 |
| 12961 | BCKDHA    | 1454.266115 | 0.238391313 | 0.144119 | 1.654124 | 0.098102 | 0.148361 |
| 11664 | ZNF280C   | 82.21977155 | 0.238244105 | 0.115724 | 2.058722 | 0.039521 | 0.066417 |
| 17630 | TMEM215   | 0.423392823 | 0.238123216 | 0.838456 | 0.284002 | 0.776409 | 0.863161 |
| 17545 | DAZ1      | 8.445546119 | 0.238030207 | 0.786193 | 0.302763 | 0.76207  | 0.851352 |
| 11946 | C1orf156  | 160.8559764 | 0.237989182 | 0.120366 | 1.977215 | 0.048017 | 0.078787 |
| 11820 | ESYT1     | 3250.096268 | 0.237935925 | 0.118091 | 2.01486  | 0.043919 | 0.072825 |
| 17157 | SCGBL     | 0.368236133 | 0.237878754 | 0.59961  | 0.396722 | 0.691572 | 0.790086 |
| 17190 | LENEP     | 0.305200754 | 0.237878708 | 0.611266 | 0.389157 | 0.69716  | 0.794941 |
| 17298 | KDM4DL    | 0.353190853 | 0.237878695 | 0.647434 | 0.367417 | 0.713308 | 0.808275 |
| 17394 | FKSG29    | 0.247662844 | 0.23787855  | 0.693739 | 0.342894 | 0.731679 | 0.824469 |
| 17502 | USP50     | 0.226945004 | 0.237878428 | 0.756373 | 0.314499 | 0.753142 | 0.843466 |
| 17765 | AKAP14    | 0.217268186 | 0.237878035 | 0.938692 | 0.253414 | 0.799948 | 0.882622 |
| 17966 | RAG2      | 0.288271976 | 0.237877739 | 1.114065 | 0.213522 | 0.83092  | 0.906538 |
| 17927 | LOC126536 | 0.182057987 | 0.23787769  | 1.066261 | 0.223095 | 0.823461 | 0.900318 |
| 17977 | IFNW1     | 0.152641665 | 0.237877445 | 1.128884 | 0.210719 | 0.833106 | 0.908367 |
| 18183 | LOC144776 | 0.14742052  | 0.237876451 | 1.426329 | 0.166775 | 0.867547 | 0.935202 |
| 18184 | HMX1      | 0.147334286 | 0.237876438 | 1.429856 | 0.166364 | 0.867871 | 0.935485 |
| 18254 | OR52R1    | 0.126779248 | 0.237875827 | 1.567659 | 0.15174  | 0.879392 | 0.944285 |
| 18326 | ATP1B4    | 0.150394278 | 0.237875328 | 1.701149 | 0.139832 | 0.888793 | 0.950577 |
| 18351 | OR5A1     | 0.106072034 | 0.237874966 | 1.742656 | 0.136501 | 0.891425 | 0.952033 |
| 18409 | DBX1      | 0.151467447 | 0.237874481 | 1.882057 | 0.126391 | 0.899423 | 0.957585 |
| 18446 | ZBPB      | 0.091888416 | 0.23787378  | 1.95572  | 0.12163  | 0.903192 | 0.96008  |
| 18448 | RIT2      | 0.08812687  | 0.237873725 | 1.965825 | 0.121005 | 0.903687 | 0.960168 |
| 18504 | GPR6      | 0.10782819  | 0.237872761 | 2.157049 | 0.110277 | 0.91219  | 0.966216 |
| 18516 | OR2T35    | 0.086262409 | 0.237872301 | 2.210611 | 0.107605 | 0.914309 | 0.967909 |
| 18525 | OR5B12    | 0.069145459 | 0.237871785 | 2.269384 | 0.104818 | 0.91652  | 0.969755 |
| 18691 | OR51A7    | 0.091362398 | 0.237867649 | 2.867948 | 0.08294  | 0.933899 | 0.979957 |
| 18675 | CD300LD   | 0.068762358 | 0.237867032 | 2.91407  | 0.081627 | 0.934943 | 0.979957 |
| 18699 | TTL8      | 0.070693554 | 0.237867032 | 2.91407  | 0.081627 | 0.934943 | 0.979957 |
| 18672 | ATXN8OS   | 0.068796644 | 0.237867032 | 2.91407  | 0.081627 | 0.934943 | 0.979957 |
| 18673 | AWAT1     | 0.048087795 | 0.237866787 | 2.91407  | 0.081627 | 0.934943 | 0.979957 |
| 18679 | FBXW12    | 0.050835768 | 0.237866787 | 2.91407  | 0.081627 | 0.934943 | 0.979957 |
| 18689 | OR4F4     | 0.046877228 | 0.237866787 | 2.91407  | 0.081627 | 0.934943 | 0.979957 |
| 18690 | OR4F5     | 0.047572343 | 0.237866787 | 2.91407  | 0.081627 | 0.934943 | 0.979957 |

|       |           |             |             |          |          |          |          |
|-------|-----------|-------------|-------------|----------|----------|----------|----------|
| 18692 | OR51G1    | 0.050153627 | 0.237866787 | 2.91407  | 0.081627 | 0.934943 | 0.979957 |
| 18694 | RBMY1A1   | 0.050013461 | 0.237866787 | 2.91407  | 0.081627 | 0.934943 | 0.979957 |
| 18696 | SPATA3    | 0.049681277 | 0.237866787 | 2.91407  | 0.081627 | 0.934943 | 0.979957 |
| 18700 | ZCCHC13   | 0.050400456 | 0.237866787 | 2.91407  | 0.081627 | 0.934943 | 0.979957 |
| 18685 | LOC285045 | 0.04924983  | 0.237866787 | 2.91407  | 0.081627 | 0.934943 | 0.979957 |
| 18677 | DEFB126   | 0.030452161 | 0.237866542 | 2.91407  | 0.081627 | 0.934943 | 0.979957 |
| 18680 | GNAT3     | 0.029368297 | 0.237866542 | 2.91407  | 0.081627 | 0.934943 | 0.979957 |
| 18682 | KRTAP1-3  | 0.030873529 | 0.237866542 | 2.91407  | 0.081627 | 0.934943 | 0.979957 |
| 18687 | OR11L1    | 0.030633055 | 0.237866542 | 2.91407  | 0.081627 | 0.934943 | 0.979957 |
| 18688 | OR4D9     | 0.030675717 | 0.237866542 | 2.91407  | 0.081627 | 0.934943 | 0.979957 |
| 18698 | SPINT3    | 0.030089998 | 0.237866542 | 2.91407  | 0.081627 | 0.934943 | 0.979957 |
| 16472 | CBLN1     | 15.79190647 | 0.237791694 | 0.409208 | 0.581102 | 0.561172 | 0.667771 |
| 8355  | GOLGA1    | 532.1940905 | 0.237742355 | 0.072698 | 3.270257 | 0.001074 | 0.002521 |
| 10750 | MBD5      | 394.6693099 | 0.237726208 | 0.099855 | 2.380716 | 0.017279 | 0.031506 |
| 12624 | CMPK1     | 3446.489242 | 0.237455708 | 0.134532 | 1.765055 | 0.077554 | 0.120417 |
| 13687 | ZNF321    | 81.46293663 | 0.237310001 | 0.166701 | 1.423566 | 0.154572 | 0.221361 |
| 14814 | KLF2      | 542.5000463 | 0.237293211 | 0.223784 | 1.060365 | 0.288978 | 0.382359 |
| 14075 | C9orf150  | 339.4188644 | 0.237142256 | 0.183022 | 1.295704 | 0.195078 | 0.271667 |
| 11101 | PNMA1     | 1168.681067 | 0.237131278 | 0.105175 | 2.254644 | 0.024156 | 0.042652 |
| 15356 | C8orf46   | 92.49302186 | 0.236533061 | 0.261836 | 0.903362 | 0.366334 | 0.467572 |
| 14346 | ZBED3     | 75.41060208 | 0.236515594 | 0.1946   | 1.215392 | 0.224217 | 0.306348 |
| 14077 | TCTE3     | 44.66701955 | 0.236290168 | 0.182543 | 1.294434 | 0.195516 | 0.272238 |
| 13276 | RAB30     | 58.90458449 | 0.236239513 | 0.152215 | 1.552013 | 0.120659 | 0.178144 |
| 11312 | SFRS12    | 1459.931983 | 0.236208003 | 0.108597 | 2.17509  | 0.029623 | 0.05133  |
| 15503 | CXCL12    | 1934.377802 | 0.235862241 | 0.274225 | 0.860104 | 0.389732 | 0.492752 |
| 9545  | TTLL5     | 391.5346435 | 0.23576645  | 0.08413  | 2.802409 | 0.005072 | 0.010416 |
| 11283 | PHC1      | 597.4803744 | 0.235718941 | 0.107914 | 2.184326 | 0.028938 | 0.050272 |
| 9827  | MSL2      | 748.8124391 | 0.235677823 | 0.08697  | 2.709873 | 0.006731 | 0.013426 |
| 12797 | LOH12CR2  | 27.90763794 | 0.235518554 | 0.138154 | 1.704749 | 0.088241 | 0.135158 |
| 16859 | STAB2     | 4.544218811 | 0.235474146 | 0.493837 | 0.476826 | 0.633486 | 0.736518 |
| 11815 | HDHD1A    | 497.5986675 | 0.23497796  | 0.116497 | 2.017036 | 0.043692 | 0.072484 |
| 14393 | FGD5      | 1198.738876 | 0.234879732 | 0.195796 | 1.199617 | 0.230288 | 0.313616 |
| 12096 | PARP11    | 264.6767286 | 0.234492577 | 0.121461 | 1.930593 | 0.053533 | 0.086748 |
| 15639 | TCF21     | 117.6699448 | 0.234454713 | 0.284285 | 0.824718 | 0.409532 | 0.513283 |
| 13578 | RAB11FIP3 | 2492.533862 | 0.234397089 | 0.160393 | 1.461388 | 0.143909 | 0.207745 |
| 11469 | VAMP4     | 464.3276663 | 0.234276196 | 0.110055 | 2.128714 | 0.033278 | 0.056868 |
| 12625 | KLC2      | 499.0902391 | 0.234122413 | 0.132653 | 1.764919 | 0.077577 | 0.120437 |
| 11100 | MRPS10    | 791.2342431 | 0.233988153 | 0.103778 | 2.254694 | 0.024153 | 0.04265  |
| 11544 | TSFM      | 643.2336051 | 0.233865438 | 0.11136  | 2.100077 | 0.035722 | 0.060654 |
| 11939 | GTF3C3    | 598.0239877 | 0.233819643 | 0.118174 | 1.978612 | 0.04786  | 0.078574 |
| 14263 | C16orf71  | 15.14678398 | 0.233810243 | 0.188569 | 1.239917 | 0.215006 | 0.295473 |
| 12553 | TMPO      | 1236.606375 | 0.233695559 | 0.130582 | 1.789648 | 0.073511 | 0.114784 |
| 13781 | ICOSLG    | 598.2510565 | 0.233652371 | 0.167741 | 1.392936 | 0.163639 | 0.232747 |
| 15839 | FAM71F2   | 9.298382728 | 0.23357005  | 0.306924 | 0.761002 | 0.446656 | 0.552708 |
| 12475 | IQSEC1    | 1593.988603 | 0.233564785 | 0.129037 | 1.810063 | 0.070286 | 0.110426 |
| 9247  | MARK3     | 977.4401508 | 0.233563966 | 0.079987 | 2.920025 | 0.0035   | 0.007419 |
| 12081 | CSNK1G3   | 758.4993691 | 0.233483042 | 0.120768 | 1.933313 | 0.053198 | 0.086311 |

|       |           |             |             |          |          |          |          |
|-------|-----------|-------------|-------------|----------|----------|----------|----------|
| 12394 | PMS1      | 279.9870208 | 0.233179944 | 0.126914 | 1.837306 | 0.066165 | 0.104639 |
| 13404 | PGAM4     | 110.4098847 | 0.233174741 | 0.154284 | 1.511332 | 0.130704 | 0.191132 |
| 10936 | AP3D1     | 3077.607624 | 0.23302664  | 0.100962 | 2.308053 | 0.020996 | 0.037632 |
| 12187 | RLF       | 756.4923438 | 0.232975635 | 0.122587 | 1.900495 | 0.057368 | 0.092268 |
| 15163 | PCDHGA6   | 55.99788253 | 0.232911026 | 0.243255 | 0.957478 | 0.338326 | 0.437349 |
| 13823 | GCH1      | 282.6129941 | 0.232880266 | 0.168932 | 1.378543 | 0.168036 | 0.238275 |
| 17138 | C21orf128 | 1.059117068 | 0.232817876 | 0.580271 | 0.401222 | 0.688256 | 0.787158 |
| 8232  | RNF214    | 329.2922846 | 0.232773926 | 0.070131 | 3.319124 | 0.000903 | 0.00215  |
| 11697 | EBAG9     | 793.3889265 | 0.232734304 | 0.113421 | 2.051942 | 0.040175 | 0.067323 |
| 12767 | PRKD3     | 1125.85293  | 0.232700112 | 0.135786 | 1.713723 | 0.08658  | 0.132925 |
| 14047 | SPDYE1    | 11.24282555 | 0.232698183 | 0.178697 | 1.302194 | 0.19285  | 0.2691   |
| 10484 | POLR2C    | 1997.51334  | 0.232627408 | 0.093867 | 2.47826  | 0.013202 | 0.024684 |
| 12368 | MRPL3     | 1577.189939 | 0.232366644 | 0.125941 | 1.84504  | 0.065032 | 0.103063 |
| 11808 | ERLEC1    | 1809.827385 | 0.232340249 | 0.115102 | 2.018559 | 0.043533 | 0.072264 |
| 15714 | HYMAI     | 4.519845207 | 0.232286416 | 0.290269 | 0.800246 | 0.423568 | 0.528363 |
| 15243 | ST8SIA4   | 1216.471697 | 0.231965563 | 0.248177 | 0.934676 | 0.349955 | 0.450008 |
| 11951 | IRAK4     | 597.5051198 | 0.231866481 | 0.117433 | 1.974455 | 0.04833  | 0.079267 |
| 14051 | MCART2    | 6.3371091   | 0.231842441 | 0.17825  | 1.300662 | 0.193374 | 0.269736 |
| 10697 | CRNKL1    | 768.7647403 | 0.231097351 | 0.096351 | 2.398505 | 0.016462 | 0.030165 |
| 9997  | VPS53     | 809.8833962 | 0.231050452 | 0.08707  | 2.653632 | 0.007963 | 0.015613 |
| 14103 | FZD6      | 985.7262778 | 0.231029305 | 0.179362 | 1.288064 | 0.197724 | 0.274806 |
| 13727 | PPIL6     | 94.21510355 | 0.231000544 | 0.164114 | 1.407558 | 0.159262 | 0.227413 |
| 12109 | FBXO31    | 647.2173141 | 0.23096115  | 0.119942 | 1.925614 | 0.054153 | 0.087657 |
| 16649 | CBWD5     | 2.798029838 | 0.230892193 | 0.431918 | 0.534574 | 0.592945 | 0.698078 |
| 15108 | ATP1B2    | 328.0300184 | 0.230591742 | 0.236976 | 0.97306  | 0.330523 | 0.428811 |
| 9645  | KDM4C     | 602.6858024 | 0.230478199 | 0.083373 | 2.764414 | 0.005703 | 0.011589 |
| 9488  | YTHDF2    | 1677.598182 | 0.230471274 | 0.081654 | 2.82253  | 0.004765 | 0.009843 |
| 12099 | MGST2     | 970.7953931 | 0.230368655 | 0.119414 | 1.929157 | 0.053711 | 0.087015 |
| 10856 | GPR107    | 2691.428037 | 0.23029923  | 0.098505 | 2.337947 | 0.01939  | 0.03501  |
| 15641 | BAGE2     | 2.927531318 | 0.230071831 | 0.279113 | 0.824297 | 0.409771 | 0.513517 |
| 12324 | SMC6      | 651.9999014 | 0.229931749 | 0.12377  | 1.857737 | 0.063206 | 0.100528 |
| 13380 | KIAA0182  | 1601.861057 | 0.229923938 | 0.15153  | 1.517345 | 0.12918  | 0.189242 |
| 14221 | GBE1      | 1806.697015 | 0.229918559 | 0.183748 | 1.251272 | 0.210835 | 0.290597 |
| 12903 | NCK1      | 762.1349021 | 0.229867027 | 0.137452 | 1.67235  | 0.094455 | 0.143491 |
| 13992 | KALRN     | 555.7199853 | 0.229850051 | 0.174103 | 1.320198 | 0.186769 | 0.261639 |
| 8832  | LEO1      | 442.7879348 | 0.229802589 | 0.074683 | 3.077054 | 0.002091 | 0.004639 |
| 12603 | CHKB      | 275.3713982 | 0.229796907 | 0.129732 | 1.771317 | 0.076508 | 0.11899  |
| 14256 | OC1002868 | 21.0302126  | 0.229661206 | 0.185054 | 1.241052 | 0.214587 | 0.295031 |
| 10028 | ZC3H11A   | 2891.732732 | 0.229186161 | 0.086729 | 2.64256  | 0.008228 | 0.016083 |
| 14630 | PAX8      | 3076.577428 | 0.229174    | 0.204128 | 1.122696 | 0.261567 | 0.350442 |
| 13328 | ACADVL    | 8149.796088 | 0.229093659 | 0.149317 | 1.534279 | 0.124961 | 0.183776 |
| 14673 | OC1001709 | 36.07960125 | 0.22908812  | 0.206406 | 1.109892 | 0.267046 | 0.356734 |
| 8247  | PRPSAP1   | 559.454756  | 0.228979642 | 0.069101 | 3.313709 | 0.000921 | 0.002188 |
| 15875 | GPR20     | 11.96882063 | 0.228872736 | 0.305338 | 0.749571 | 0.453513 | 0.559956 |
| 12381 | GSPT2     | 222.2018268 | 0.228858034 | 0.124268 | 1.841653 | 0.065526 | 0.103737 |
| 10602 | FAM82B    | 865.0713277 | 0.228759424 | 0.093934 | 2.435322 | 0.014879 | 0.027507 |
| 13552 | KIAA1530  | 215.3192946 | 0.228634366 | 0.155476 | 1.470541 | 0.141415 | 0.204537 |

|       |           |             |             |          |          |          |          |
|-------|-----------|-------------|-------------|----------|----------|----------|----------|
| 13436 | RNF168    | 132.3757232 | 0.228459139 | 0.151885 | 1.504157 | 0.132541 | 0.193356 |
| 9024  | RNF8      | 294.3158244 | 0.228436923 | 0.076047 | 3.003879 | 0.002666 | 0.00579  |
| 14078 | USP6      | 51.66632685 | 0.228318407 | 0.176411 | 1.294241 | 0.195582 | 0.272312 |
| 17577 | KCNB2     | 0.650892482 | 0.228255314 | 0.766959 | 0.297611 | 0.766    | 0.854157 |
| 9784  | YWHAB     | 6968.523442 | 0.228245125 | 0.083866 | 2.72154  | 0.006498 | 0.013018 |
| 11557 | PHF15     | 1480.24059  | 0.228010648 | 0.108804 | 2.095615 | 0.036116 | 0.061254 |
| 12350 | EIF4A2    | 7991.150017 | 0.227951599 | 0.123269 | 1.849223 | 0.064426 | 0.102243 |
| 13402 | MINPP1    | 720.5943893 | 0.227939821 | 0.15078  | 1.511743 | 0.130599 | 0.191007 |
| 15254 | P2RY14    | 116.6260354 | 0.227876658 | 0.244471 | 0.932121 | 0.351274 | 0.451378 |
| 14799 | TCF4      | 2332.533618 | 0.227864644 | 0.213846 | 1.065557 | 0.286624 | 0.379628 |
| 15013 | NEIL1     | 69.38884471 | 0.227719542 | 0.226577 | 1.005041 | 0.314877 | 0.411104 |
| 13375 | C2orf18   | 2820.338255 | 0.227714102 | 0.149924 | 1.518867 | 0.128796 | 0.188736 |
| 10761 | MTCH1     | 3568.932286 | 0.22709733  | 0.095496 | 2.378092 | 0.017402 | 0.031698 |
| 15483 | ADAMTS1   | 59.90390681 | 0.226939081 | 0.262061 | 0.865978 | 0.386502 | 0.4893   |
| 9624  | NUP214    | 1379.179562 | 0.226873555 | 0.081878 | 2.77086  | 0.005591 | 0.011387 |
| 14300 | OSTCL     | 5.664646038 | 0.226769326 | 0.18444  | 1.229504 | 0.218883 | 0.300023 |
| 14931 | HSD17B7   | 432.2977416 | 0.226593645 | 0.220921 | 1.025678 | 0.305043 | 0.400425 |
| 11874 | ZNF236    | 244.1657368 | 0.226547082 | 0.113365 | 1.998384 | 0.045675 | 0.075398 |
| 13502 | MAN2C1    | 1386.968278 | 0.226426021 | 0.152152 | 1.488154 | 0.13671  | 0.198462 |
| 11964 | DC1001327 | 132.1350866 | 0.226226322 | 0.114826 | 1.970167 | 0.048819 | 0.079982 |
| 12270 | SNX3      | 4329.066807 | 0.226107913 | 0.120415 | 1.877736 | 0.060417 | 0.096515 |
| 12034 | FOXO3     | 1719.127439 | 0.226043602 | 0.115905 | 1.950254 | 0.051146 | 0.083307 |
| 14734 | ADCK1     | 152.7427058 | 0.22599199  | 0.207537 | 1.088925 | 0.276187 | 0.367418 |
| 10226 | APTX      | 452.5131011 | 0.225890653 | 0.087794 | 2.572968 | 0.010083 | 0.019327 |
| 16150 | ENPP3     | 5529.067897 | 0.225444494 | 0.3384   | 0.666208 | 0.505278 | 0.613248 |
| 9475  | TRMT12    | 227.7659149 | 0.225378495 | 0.079678 | 2.828609 | 0.004675 | 0.009671 |
| 16765 | SPDYE2    | 1.141750793 | 0.225354619 | 0.451048 | 0.499625 | 0.617339 | 0.72177  |
| 10769 | USP3      | 518.8230304 | 0.22529559  | 0.094823 | 2.375953 | 0.017504 | 0.031859 |
| 14899 | HOXA6     | 18.19647868 | 0.225061957 | 0.217046 | 1.036932 | 0.299768 | 0.394372 |
| 9915  | NUP43     | 596.5293912 | 0.224983259 | 0.083875 | 2.682379 | 0.00731  | 0.014451 |
| 15099 | LGMN      | 5218.349191 | 0.224570508 | 0.229927 | 0.976705 | 0.328715 | 0.426727 |
| 12082 | JMJD5     | 109.2479003 | 0.224564136 | 0.116171 | 1.933052 | 0.05323  | 0.086356 |
| 13778 | TMEM63A   | 1297.80819  | 0.224423109 | 0.161049 | 1.393506 | 0.163467 | 0.232553 |
| 11104 | TAF1      | 801.160386  | 0.22433342  | 0.099573 | 2.252954 | 0.024262 | 0.042828 |
| 13177 | RPGR      | 172.8124793 | 0.224166965 | 0.141296 | 1.586501 | 0.112626 | 0.167533 |
| 15058 | PROCA1    | 27.70375729 | 0.224056116 | 0.226804 | 0.987885 | 0.323209 | 0.420721 |
| 15227 | C17orf57  | 50.28103905 | 0.223961236 | 0.238298 | 0.939837 | 0.347301 | 0.447064 |
| 10948 | TM9SF3    | 4863.172732 | 0.223908609 | 0.097179 | 2.304075 | 0.021218 | 0.037989 |
| 12664 | RALB      | 2690.736597 | 0.223876139 | 0.127797 | 1.751811 | 0.079806 | 0.123522 |
| 11011 | MED14     | 1366.901911 | 0.223573696 | 0.097786 | 2.286357 | 0.022233 | 0.039578 |
| 16080 | C15orf26  | 1.465028874 | 0.223479263 | 0.32478  | 0.688094 | 0.491394 | 0.598993 |
| 11851 | STIM2     | 521.8113006 | 0.223334524 | 0.111319 | 2.006252 | 0.044829 | 0.074146 |
| 15463 | FGFR2     | 699.9289724 | 0.223262653 | 0.256107 | 0.871755 | 0.383342 | 0.485927 |
| 11481 | HELZ      | 1284.642691 | 0.22297174  | 0.104829 | 2.127003 | 0.03342  | 0.057056 |
| 17085 | LECT2     | 0.819860137 | 0.222960309 | 0.535536 | 0.416331 | 0.677167 | 0.77689  |
| 12463 | ATP5J     | 1720.516835 | 0.222683437 | 0.122721 | 1.814551 | 0.069593 | 0.109451 |
| 15781 | FAM166B   | 5.148977751 | 0.222659525 | 0.285086 | 0.781026 | 0.434787 | 0.540033 |

|       |           |             |             |          |          |          |          |
|-------|-----------|-------------|-------------|----------|----------|----------|----------|
| 15313 | TMEM139   | 706.7742805 | 0.222611678 | 0.242439 | 0.918219 | 0.358504 | 0.458894 |
| 12504 | MCFD2     | 4617.64986  | 0.222292962 | 0.123313 | 1.802677 | 0.071439 | 0.111986 |
| 10723 | TMCO7     | 389.5063254 | 0.222210863 | 0.093052 | 2.38804  | 0.016939 | 0.030963 |
| 13556 | PHIP      | 1446.869462 | 0.222132383 | 0.151247 | 1.468671 | 0.141922 | 0.205209 |
| 9628  | C12orf41  | 525.8521115 | 0.22182656  | 0.080103 | 2.769262 | 0.005618 | 0.011437 |
| 8759  | COIL      | 383.9603026 | 0.221799061 | 0.071486 | 3.102677 | 0.001918 | 0.004292 |
| 12373 | ERCC6     | 219.0465443 | 0.221697208 | 0.120286 | 1.843089 | 0.065316 | 0.103472 |
| 14849 | ARHGEF15  | 655.1704693 | 0.221674723 | 0.210707 | 1.052051 | 0.292776 | 0.386471 |
| 17042 | SLC44A5   | 126.906913  | 0.221618841 | 0.517026 | 0.428642 | 0.668184 | 0.768514 |
| 15120 | DDIT3     | 853.2286736 | 0.221529306 | 0.229054 | 0.967148 | 0.33347  | 0.43227  |
| 10954 | FXR2      | 683.515529  | 0.221527694 | 0.096229 | 2.302095 | 0.02133  | 0.038167 |
| 16223 | SHISA3    | 130.0007868 | 0.221208085 | 0.340883 | 0.648927 | 0.516386 | 0.623918 |
| 16319 | CYP4B1    | 13.15280554 | 0.221152793 | 0.354537 | 0.62378  | 0.532772 | 0.639921 |
| 17006 | SLC15A1   | 192.9931153 | 0.22105409  | 0.504293 | 0.438345 | 0.661136 | 0.762021 |
| 12208 | TIPRL     | 899.5808142 | 0.220822721 | 0.116568 | 1.894362 | 0.058177 | 0.093408 |
| 11785 | ARIH2     | 1058.637518 | 0.220724622 | 0.108887 | 2.027089 | 0.042653 | 0.070942 |
| 12216 | C20orf108 | 1564.902873 | 0.220664696 | 0.116677 | 1.891239 | 0.058593 | 0.093999 |
| 14321 | LRRC8C    | 732.4038674 | 0.220593828 | 0.180287 | 1.223574 | 0.221113 | 0.302614 |
| 14186 | CCDC75    | 69.51628373 | 0.220586799 | 0.174893 | 1.261268 | 0.207212 | 0.286319 |
| 11928 | HBXIP     | 2097.233583 | 0.220493483 | 0.111333 | 1.980493 | 0.047648 | 0.078299 |
| 13409 | ZNF629    | 848.7685141 | 0.220144663 | 0.145761 | 1.510308 | 0.130965 | 0.191442 |
| 14561 | ACY1      | 1272.066567 | 0.22014463  | 0.191793 | 1.147827 | 0.25104  | 0.337932 |
| 9994  | KCTD2     | 1014.674321 | 0.220061557 | 0.082913 | 2.654111 | 0.007952 | 0.015596 |
| 13473 | GDE1      | 1697.49368  | 0.219947866 | 0.147025 | 1.495986 | 0.134657 | 0.195898 |
| 13535 | LPHN2     | 2366.966005 | 0.21994179  | 0.149129 | 1.474844 | 0.140254 | 0.203113 |
| 12415 | MRPL16    | 776.2835207 | 0.219890555 | 0.120081 | 1.831192 | 0.067072 | 0.105894 |
| 16478 | KCNE1     | 11.96931608 | 0.219873993 | 0.380178 | 0.578345 | 0.563031 | 0.66974  |
| 12006 | WDR43     | 892.9441807 | 0.219601638 | 0.112087 | 1.959211 | 0.050088 | 0.081778 |
| 12330 | PIGB      | 334.4153255 | 0.219510879 | 0.118304 | 1.855482 | 0.063527 | 0.10099  |
| 10798 | CSDE1     | 11467.86484 | 0.219453077 | 0.092935 | 2.361357 | 0.018208 | 0.033052 |
| 16064 | HLA-G     | 719.7991116 | 0.21933608  | 0.316347 | 0.693339 | 0.488097 | 0.595492 |
| 12876 | CASD1     | 792.1444728 | 0.219288305 | 0.130339 | 1.682447 | 0.092482 | 0.140774 |
| 10939 | RTN3      | 3889.54893  | 0.219237364 | 0.095032 | 2.306978 | 0.021056 | 0.037729 |
| 11132 | GPR108    | 1438.444604 | 0.219131297 | 0.097741 | 2.241955 | 0.024964 | 0.043958 |
| 12839 | RAP1A     | 1674.083225 | 0.219086192 | 0.129396 | 1.69315  | 0.090427 | 0.138053 |
| 11458 | GOLGA2    | 1547.022119 | 0.218927885 | 0.102696 | 2.131797 | 0.033024 | 0.056488 |
| 13420 | PUS10     | 183.7382146 | 0.218906149 | 0.145166 | 1.507974 | 0.131561 | 0.192156 |
| 13153 | ARL17A    | 65.31954803 | 0.218895763 | 0.137341 | 1.593808 | 0.110979 | 0.165384 |
| 12145 | RAPGEF1   | 2824.343167 | 0.218889733 | 0.114389 | 1.913551 | 0.055678 | 0.089859 |
| 15223 | KCNN2     | 24.89956671 | 0.218857708 | 0.232649 | 0.94072  | 0.346848 | 0.446599 |
| 15815 | AKAP12    | 5264.292488 | 0.21865917  | 0.28335  | 0.771693 | 0.440296 | 0.5457   |
| 14983 | KLHDC9    | 97.90381425 | 0.218568225 | 0.21629  | 1.010532 | 0.31224  | 0.408478 |
| 9974  | VPS39     | 1811.161647 | 0.218551376 | 0.0821   | 2.66203  | 0.007767 | 0.015264 |
| 11606 | ZNF605    | 448.2219254 | 0.218523418 | 0.105099 | 2.079215 | 0.037598 | 0.063497 |
| 12351 | NDUFS4    | 808.2032078 | 0.218376355 | 0.118091 | 1.849228 | 0.064425 | 0.102243 |
| 14578 | SQLE      | 525.0461134 | 0.21832317  | 0.191074 | 1.142613 | 0.253199 | 0.340442 |
| 11922 | HDAC2     | 1417.299819 | 0.218281599 | 0.110141 | 1.981844 | 0.047497 | 0.07809  |

|       |           |             |             |          |          |          |          |
|-------|-----------|-------------|-------------|----------|----------|----------|----------|
| 12838 | CRAMP1L   | 557.4697555 | 0.217974732 | 0.128736 | 1.693197 | 0.090418 | 0.13805  |
| 13488 | ZNF432    | 155.139192  | 0.217869203 | 0.146105 | 1.491184 | 0.135913 | 0.197513 |
| 13433 | EVI5      | 425.9400469 | 0.217805934 | 0.144765 | 1.504544 | 0.132441 | 0.193254 |
| 14478 | PLXNB1    | 1456.1724   | 0.217778896 | 0.18538  | 1.174771 | 0.240086 | 0.32504  |
| 16298 | MYO3A     | 177.0440925 | 0.217715115 | 0.346714 | 0.627939 | 0.530044 | 0.637464 |
| 14246 | SLC39A13  | 1537.841064 | 0.217447581 | 0.174913 | 1.243173 | 0.213804 | 0.294172 |
| 14045 | C14orf106 | 340.2230626 | 0.217402309 | 0.166885 | 1.302707 | 0.192675 | 0.268911 |
| 12220 | SNAPC5    | 98.09166183 | 0.21712018  | 0.114825 | 1.890885 | 0.05864  | 0.094059 |
| 12120 | SAMM50    | 1087.306835 | 0.217054958 | 0.112903 | 1.922492 | 0.054544 | 0.088211 |
| 14405 | KCTD14    | 340.0718416 | 0.216877184 | 0.18121  | 1.196826 | 0.231375 | 0.314833 |
| 14421 | VPS18     | 1025.021575 | 0.216853428 | 0.181945 | 1.191865 | 0.233314 | 0.31712  |
| 14817 | CCDC152   | 130.0612723 | 0.216771428 | 0.204599 | 1.059495 | 0.289375 | 0.382806 |
| 15889 | EPHB1     | 85.55024971 | 0.216747105 | 0.290555 | 0.745976 | 0.455682 | 0.562139 |
| 14628 | GATC      | 35.82395285 | 0.216467844 | 0.19252  | 1.124389 | 0.260848 | 0.349527 |
| 12229 | C4orf52   | 492.1953282 | 0.216459419 | 0.1146   | 1.888828 | 0.058915 | 0.09443  |
| 13547 | CALML4    | 717.493211  | 0.216443665 | 0.14704  | 1.472004 | 0.14102  | 0.20404  |
| 16736 | OR56B4    | 0.710874645 | 0.216313052 | 0.42439  | 0.509703 | 0.610259 | 0.714728 |
| 11610 | ULK2      | 543.615512  | 0.216234545 | 0.104025 | 2.078669 | 0.037648 | 0.06356  |
| 11633 | USP47     | 1743.40081  | 0.21581826  | 0.104371 | 2.067804 | 0.038658 | 0.065137 |
| 11645 | KIAA0753  | 336.7729028 | 0.215760612 | 0.10462  | 2.062335 | 0.039176 | 0.065941 |
| 12224 | NXF1      | 1423.939312 | 0.215742461 | 0.114128 | 1.890351 | 0.058711 | 0.094135 |
| 15576 | SMN1      | 4.027870482 | 0.215728331 | 0.256337 | 0.84158  | 0.400023 | 0.503394 |
| 10876 | PTPN9     | 1249.012946 | 0.21557287  | 0.092503 | 2.330431 | 0.019783 | 0.035654 |
| 17842 | CLEC2L    | 0.950619084 | 0.215418725 | 0.909883 | 0.236754 | 0.812847 | 0.892979 |
| 12438 | TNKS      | 1152.099013 | 0.215298692 | 0.117967 | 1.825078 | 0.067989 | 0.107144 |
| 12026 | TMEM167E  | 1370.913315 | 0.215271096 | 0.110157 | 1.95423  | 0.050674 | 0.082596 |
| 11891 | GRPEL1    | 881.3282264 | 0.215248655 | 0.108087 | 1.991442 | 0.046432 | 0.076539 |
| 10956 | C22orf29  | 302.9562509 | 0.215179919 | 0.093507 | 2.301216 | 0.021379 | 0.038242 |
| 14005 | DC1003024 | 21.1833843  | 0.214909012 | 0.163212 | 1.316749 | 0.187923 | 0.263011 |
| 14987 | FAM149A   | 898.9206457 | 0.214793461 | 0.21267  | 1.009983 | 0.312504 | 0.408703 |
| 11367 | ANAPC16   | 2413.055914 | 0.214599502 | 0.099253 | 2.162157 | 0.030606 | 0.052776 |
| 12194 | TEP1      | 688.5274913 | 0.214558919 | 0.113023 | 1.898372 | 0.057647 | 0.092664 |
| 14236 | RGPD1     | 313.4169012 | 0.214364278 | 0.172011 | 1.246221 | 0.212683 | 0.292835 |
| 12782 | BBS5      | 158.7303546 | 0.214352272 | 0.125378 | 1.709642 | 0.087332 | 0.133922 |
| 12738 | SMAD3     | 1729.08491  | 0.21433099  | 0.124556 | 1.720759 | 0.085295 | 0.13125  |
| 12322 | MEX3C     | 795.4197958 | 0.214158721 | 0.115221 | 1.85868  | 0.063073 | 0.100332 |
| 11212 | CAMTA1    | 514.3948002 | 0.213833435 | 0.096468 | 2.216618 | 0.026649 | 0.046589 |
| 12431 | MLLT6     | 2840.003492 | 0.213777215 | 0.117024 | 1.826787 | 0.067732 | 0.10679  |
| 10502 | PCBP1     | 9271.473348 | 0.213736037 | 0.086506 | 2.470753 | 0.013483 | 0.025165 |
| 10638 | SF3A1     | 2567.217179 | 0.213593208 | 0.088277 | 2.419585 | 0.015538 | 0.02863  |
| 13037 | ZFP82     | 102.3362698 | 0.213495644 | 0.130749 | 1.632863 | 0.102498 | 0.154104 |
| 11750 | CTNS      | 459.3809608 | 0.213458699 | 0.104804 | 2.036748 | 0.041675 | 0.069521 |
| 11926 | TMEM131   | 1664.141097 | 0.213441208 | 0.10775  | 1.9809   | 0.047603 | 0.078237 |
| 12638 | PAPOLG    | 350.6671836 | 0.213383941 | 0.121141 | 1.761446 | 0.078163 | 0.121227 |
| 11337 | UBXN2A    | 215.5172968 | 0.213200359 | 0.098268 | 2.169588 | 0.030038 | 0.051934 |
| 10213 | TSPAN3    | 4580.38515  | 0.213099794 | 0.082693 | 2.577015 | 0.009966 | 0.019127 |
| 12477 | MGC57346  | 139.1573915 | 0.213094159 | 0.117794 | 1.809043 | 0.070444 | 0.110666 |

|       |          |             |             |          |          |          |          |
|-------|----------|-------------|-------------|----------|----------|----------|----------|
| 12834 | ZFC3H1   | 730.176024  | 0.213068133 | 0.125777 | 1.694012 | 0.090263 | 0.137856 |
| 14634 | GUCY1A3  | 3045.548228 | 0.212933612 | 0.189796 | 1.121907 | 0.261902 | 0.350803 |
| 8746  | ADD1     | 5547.726639 | 0.212749397 | 0.068413 | 3.109767 | 0.001872 | 0.004196 |
| 8540  | RBM45    | 149.6982646 | 0.212702283 | 0.06662  | 3.192786 | 0.001409 | 0.003234 |
| 14900 | FAM86B1  | 75.45660135 | 0.212510086 | 0.205062 | 1.036322 | 0.300052 | 0.394719 |
| 14040 | SH2B1    | 1046.489342 | 0.212077161 | 0.162441 | 1.305568 | 0.1917   | 0.267628 |
| 14030 | SEC24A   | 1408.326121 | 0.212027862 | 0.161823 | 1.310242 | 0.190114 | 0.265604 |
| 10428 | DHX57    | 503.2595236 | 0.211857133 | 0.084727 | 2.50046  | 0.012403 | 0.023314 |
| 16338 | CHRM4    | 2.890003049 | 0.211826311 | 0.343756 | 0.616211 | 0.537755 | 0.645184 |
| 11812 | C6orf70  | 357.0460529 | 0.211713932 | 0.104945 | 2.017388 | 0.043655 | 0.072436 |
| 12367 | ERCC2    | 368.1166317 | 0.211675243 | 0.114669 | 1.845966 | 0.064897 | 0.102858 |
| 15247 | C6orf165 | 43.51966681 | 0.211261198 | 0.226131 | 0.934241 | 0.35018  | 0.450178 |
| 11672 | PDS5A    | 2635.160179 | 0.211209626 | 0.102657 | 2.05743  | 0.039645 | 0.066575 |
| 15540 | FAM38B   | 388.8055503 | 0.211095701 | 0.248627 | 0.849045 | 0.395856 | 0.499303 |
| 9955  | ZXDC     | 1089.554369 | 0.211081862 | 0.079089 | 2.66891  | 0.00761  | 0.014983 |
| 14373 | CCDC73   | 51.05366715 | 0.211062675 | 0.174963 | 1.206325 | 0.227692 | 0.310512 |
| 12578 | VDAC1    | 7697.308005 | 0.210882624 | 0.118533 | 1.779111 | 0.075222 | 0.117222 |
| 9290  | BSDC1    | 1762.517969 | 0.210796891 | 0.072606 | 2.903318 | 0.003692 | 0.00779  |
| 15559 | GPR88    | 6.933893423 | 0.21069842  | 0.249488 | 0.844523 | 0.398377 | 0.50187  |
| 12162 | SMG5     | 2455.197532 | 0.210598655 | 0.110392 | 1.907733 | 0.056426 | 0.090953 |
| 10548 | DNTTIP2  | 1195.755606 | 0.21050058  | 0.085792 | 2.453629 | 0.014142 | 0.02628  |
| 16243 | EFHC2    | 109.1046777 | 0.21043032  | 0.327516 | 0.642504 | 0.520546 | 0.628161 |
| 10979 | DHX35    | 261.7042982 | 0.210353048 | 0.091687 | 2.294244 | 0.021777 | 0.038878 |
| 13183 | STYX     | 499.8721398 | 0.210297435 | 0.132707 | 1.584679 | 0.113039 | 0.168071 |
| 11767 | ATP9B    | 564.1192621 | 0.210051359 | 0.103419 | 2.031066 | 0.042248 | 0.070376 |
| 17835 | NPPC     | 0.86916411  | 0.209839476 | 0.880829 | 0.23823  | 0.811703 | 0.892124 |
| 14750 | EVC2     | 150.0564606 | 0.209839298 | 0.1936   | 1.083881 | 0.278418 | 0.369984 |
| 12901 | MLL2     | 1977.56966  | 0.209657361 | 0.125304 | 1.673189 | 0.09429  | 0.143259 |
| 17583 | ARX      | 31.25283166 | 0.209557971 | 0.705731 | 0.296938 | 0.766514 | 0.854438 |
| 13379 | TMX3     | 1455.363348 | 0.209475334 | 0.138016 | 1.517758 | 0.129075 | 0.189103 |
| 14970 | PPP1R16B | 517.6407277 | 0.209329115 | 0.206099 | 1.015674 | 0.309785 | 0.405617 |
| 11721 | RIOK2    | 516.0109741 | 0.209309705 | 0.102309 | 2.045858 | 0.04077  | 0.06818  |
| 14471 | ALOX12   | 5.329166723 | 0.209276734 | 0.177943 | 1.176089 | 0.239559 | 0.324483 |
| 14977 | FOXJ3    | 3423.272509 | 0.208929542 | 0.205932 | 1.014556 | 0.310317 | 0.406125 |
| 10729 | ZNF143   | 334.110941  | 0.208736099 | 0.087426 | 2.38758  | 0.01696  | 0.030984 |
| 14357 | SCARF1   | 530.5306331 | 0.20856972  | 0.172151 | 1.211552 | 0.225684 | 0.308117 |
| 10417 | ZFYVE20  | 501.6781325 | 0.208420407 | 0.083201 | 2.505033 | 0.012244 | 0.023039 |
| 12611 | ZNF623   | 342.7643575 | 0.208314884 | 0.117833 | 1.767876 | 0.077082 | 0.119806 |
| 13688 | C17orf86 | 149.2251079 | 0.208300427 | 0.146416 | 1.422663 | 0.154834 | 0.22172  |
| 10361 | SFRS3    | 3861.187903 | 0.208252996 | 0.082557 | 2.522525 | 0.011652 | 0.022042 |
| 13059 | SOCS5    | 717.8348727 | 0.20814259  | 0.128011 | 1.625974 | 0.103955 | 0.156032 |
| 13777 | SBF1     | 1702.389781 | 0.208082594 | 0.149262 | 1.394076 | 0.163295 | 0.232325 |
| 8798  | GANC     | 339.7573833 | 0.207958259 | 0.067367 | 3.086964 | 0.002022 | 0.004505 |
| 15601 | PKDCC    | 468.1590287 | 0.207712123 | 0.248803 | 0.834845 | 0.403805 | 0.507338 |
| 11319 | DHX16    | 650.0475098 | 0.207639816 | 0.095526 | 2.173646 | 0.029732 | 0.051486 |
| 9929  | DCAF5    | 1467.764936 | 0.207620784 | 0.077541 | 2.677548 | 0.007416 | 0.014641 |
| 16534 | IL12RB2  | 46.63712683 | 0.207274406 | 0.36791  | 0.563384 | 0.573173 | 0.679495 |



|       |          |             |             |          |          |          |          |
|-------|----------|-------------|-------------|----------|----------|----------|----------|
| 14473 | GMCL1    | 437.9730226 | 0.207246118 | 0.176238 | 1.175942 | 0.239618 | 0.324518 |
| 13677 | GCDH     | 344.687462  | 0.207115119 | 0.145023 | 1.428158 | 0.153246 | 0.219623 |
| 11351 | CUL2     | 651.1236935 | 0.20695843  | 0.095574 | 2.165434 | 0.030354 | 0.052416 |
| 14281 | NKTR     | 1297.570947 | 0.206907043 | 0.167589 | 1.23461  | 0.216976 | 0.297804 |
| 12929 | ANAPC2   | 602.4316831 | 0.206723666 | 0.124188 | 1.664602 | 0.095992 | 0.145506 |
| 15554 | AK3L1    | 1151.746905 | 0.206358007 | 0.244125 | 0.845298 | 0.397944 | 0.501421 |
| 12819 | COX16    | 744.5578973 | 0.206339785 | 0.121398 | 1.699702 | 0.089187 | 0.136372 |
| 10420 | NFATC2IP | 706.5814669 | 0.206281499 | 0.082387 | 2.503807 | 0.012287 | 0.023112 |
| 12518 | KIAA0100 | 3730.240595 | 0.206062464 | 0.114568 | 1.79861  | 0.07208  | 0.112865 |
| 15077 | PLEKHJ1  | 786.0619731 | 0.205970181 | 0.209347 | 0.983872 | 0.325179 | 0.422752 |
| 11909 | TAF3     | 188.6322165 | 0.205943501 | 0.103739 | 1.98521  | 0.047121 | 0.077556 |
| 13369 | METTL8   | 337.6049567 | 0.205906048 | 0.13535  | 1.521282 | 0.128189 | 0.187945 |
| 15014 | ROBO4    | 1576.392357 | 0.205773171 | 0.204775 | 1.004875 | 0.314957 | 0.411181 |
| 16226 | PAQR6    | 56.3638055  | 0.205746535 | 0.31748  | 0.64806  | 0.516946 | 0.62447  |
| 17614 | NR2E1    | 86.61004637 | 0.205715927 | 0.70878  | 0.290239 | 0.771633 | 0.858679 |
| 13193 | BCL10    | 509.822352  | 0.205706332 | 0.130096 | 1.581192 | 0.113834 | 0.169125 |
| 12352 | ATG5     | 670.5658302 | 0.205564852 | 0.111168 | 1.849141 | 0.064437 | 0.102254 |
| 14341 | ZNF502   | 71.84283467 | 0.205493128 | 0.168843 | 1.217069 | 0.223578 | 0.305587 |
| 11341 | UTP18    | 589.1349522 | 0.20543532  | 0.094723 | 2.168795 | 0.030098 | 0.05202  |
| 12694 | KIAA1432 | 749.5112932 | 0.205387073 | 0.118346 | 1.735485 | 0.082655 | 0.127629 |
| 15659 | PIP5K1P1 | 2.27094665  | 0.205366325 | 0.25073  | 0.819073 | 0.412745 | 0.516616 |
| 9747  | RBMX     | 3500.320205 | 0.205003825 | 0.075    | 2.733389 | 0.006269 | 0.012606 |
| 17331 | TAGLN3   | 7.780259217 | 0.204823156 | 0.568574 | 0.36024  | 0.718667 | 0.812798 |
| 13575 | COX7A2   | 1442.417148 | 0.204814507 | 0.140022 | 1.462729 | 0.143542 | 0.20726  |
| 10372 | SRP14    | 4166.092241 | 0.204788345 | 0.081397 | 2.515914 | 0.011872 | 0.022436 |
| 13215 | PTEN     | 2313.662105 | 0.204784263 | 0.13001  | 1.575145 | 0.115223 | 0.170903 |
| 13937 | SLFN12   | 169.4913168 | 0.20470317  | 0.152796 | 1.339718 | 0.180337 | 0.253626 |
| 14395 | ZNF774   | 14.17295287 | 0.204669932 | 0.170688 | 1.199085 | 0.230495 | 0.313854 |
| 13249 | MAP4K2   | 267.396598  | 0.204550256 | 0.130873 | 1.562972 | 0.118059 | 0.174672 |
| 13752 | HS2ST1   | 1536.726798 | 0.204413198 | 0.145779 | 1.402209 | 0.160853 | 0.229267 |
| 11371 | TNFAIP1  | 1716.504464 | 0.204051453 | 0.094439 | 2.160661 | 0.030722 | 0.052957 |
| 17345 | IGLL3    | 0.558214825 | 0.203990588 | 0.575599 | 0.354397 | 0.723041 | 0.817078 |
| 15893 | ETNK2    | 653.1651158 | 0.203837278 | 0.273697 | 0.744755 | 0.45642  | 0.562872 |
| 13064 | MAPKBP1  | 429.0918579 | 0.203744241 | 0.125403 | 1.62471  | 0.104224 | 0.156376 |
| 11248 | MFF      | 1428.717086 | 0.203669197 | 0.092533 | 2.201055 | 0.027732 | 0.048327 |
| 11172 | SF1      | 3773.958231 | 0.203560694 | 0.091244 | 2.230946 | 0.025685 | 0.045064 |
| 12137 | MIA3     | 1689.966213 | 0.20326502  | 0.106082 | 1.916104 | 0.055352 | 0.089385 |
| 15441 | TUBB2A   | 723.1795697 | 0.203223743 | 0.232069 | 0.875704 | 0.381191 | 0.483888 |
| 11915 | ARHGAP21 | 1501.778699 | 0.203060414 | 0.102385 | 1.983305 | 0.047333 | 0.07786  |
| 16061 | HLA-J    | 70.53990973 | 0.202869122 | 0.29216  | 0.694377 | 0.487446 | 0.594884 |
| 16033 | TCAP     | 8.860118073 | 0.202753861 | 0.288739 | 0.702206 | 0.482551 | 0.590004 |
| 11670 | INTS4    | 518.0031814 | 0.202598129 | 0.098466 | 2.057535 | 0.039635 | 0.066571 |
| 12805 | FKBP3    | 1028.856776 | 0.202591966 | 0.119004 | 1.702395 | 0.088681 | 0.135747 |
| 12501 | SLC35D2  | 684.8010237 | 0.202496642 | 0.112283 | 1.803444 | 0.071319 | 0.111824 |
| 14934 | ZNF534   | 4.585486714 | 0.202420606 | 0.19749  | 1.024968 | 0.305378 | 0.400812 |
| 15834 | C8orf4   | 958.9928207 | 0.202226415 | 0.264437 | 0.764744 | 0.444424 | 0.550155 |
| 12326 | KIAA0247 | 2636.392786 | 0.202161791 | 0.108897 | 1.856456 | 0.063389 | 0.100802 |

|       |           |             |             |          |          |          |          |
|-------|-----------|-------------|-------------|----------|----------|----------|----------|
| 14984 | P2RY8     | 496.3609003 | 0.201972747 | 0.199896 | 1.010388 | 0.31231  | 0.408514 |
| 12780 | PWWP2A    | 655.3287297 | 0.201930773 | 0.117988 | 1.711459 | 0.086996 | 0.133429 |
| 15124 | PPP1R3C   | 2026.610913 | 0.20188343  | 0.208888 | 0.966466 | 0.333811 | 0.43261  |
| 14011 | NXT2      | 358.0647508 | 0.201793415 | 0.153454 | 1.315011 | 0.188506 | 0.263715 |
| 15093 | TAS2R14   | 8.433584967 | 0.2017689   | 0.206334 | 0.977876 | 0.328135 | 0.426143 |
| 14095 | TMEM19    | 1311.312995 | 0.201728814 | 0.156439 | 1.289506 | 0.197222 | 0.274264 |
| 10006 | RAB7A     | 6023.449872 | 0.201640851 | 0.076068 | 2.650802 | 0.00803  | 0.01573  |
| 11455 | ARCN1     | 4360.944995 | 0.201126536 | 0.094285 | 2.133187 | 0.032909 | 0.056312 |
| 13601 | KLC4      | 935.8031903 | 0.200992421 | 0.138091 | 1.455504 | 0.14553  | 0.209729 |
| 12020 | MDC1      | 678.2243736 | 0.200949032 | 0.102763 | 1.955455 | 0.050529 | 0.082398 |
| 14437 | ACPL2     | 480.468918  | 0.200848167 | 0.169158 | 1.187342 | 0.235093 | 0.319183 |
| 14067 | RFESD     | 31.42542663 | 0.200713707 | 0.154706 | 1.297389 | 0.194497 | 0.271013 |
| 11881 | PCMT1     | 1106.1878   | 0.200627576 | 0.100525 | 1.995789 | 0.045957 | 0.075819 |
| 12387 | WDFY1     | 1579.726398 | 0.200476587 | 0.108942 | 1.84021  | 0.065737 | 0.104022 |
| 12966 | DGCR11    | 46.12605586 | 0.200127886 | 0.121061 | 1.653119 | 0.098307 | 0.148612 |
| 15328 | ECM2      | 592.2571303 | 0.200096849 | 0.219525 | 0.911501 | 0.362031 | 0.462955 |
| 11414 | VAMP3     | 2640.484665 | 0.200091818 | 0.093341 | 2.143659 | 0.03206  | 0.055056 |
| 14470 | GSN       | 10234.99961 | 0.199885209 | 0.169943 | 1.176189 | 0.239519 | 0.324452 |
| 12348 | FAM160A2  | 707.3662017 | 0.19983046  | 0.108044 | 1.849537 | 0.06438  | 0.102196 |
| 16930 | NMBR      | 0.749955461 | 0.199815639 | 0.438902 | 0.455262 | 0.64892  | 0.751299 |
| 14636 | PRPF40B   | 319.4516322 | 0.199794434 | 0.178125 | 1.121651 | 0.262011 | 0.350893 |
| 13561 | ZFHX3     | 970.9990746 | 0.199782428 | 0.136207 | 1.466752 | 0.142443 | 0.205887 |
| 14098 | LMO2      | 646.5226211 | 0.199418082 | 0.154702 | 1.289045 | 0.197383 | 0.274429 |
| 14220 | LOC729603 | 42.42292361 | 0.199276646 | 0.159234 | 1.251467 | 0.210764 | 0.290527 |
| 12243 | ERC1      | 1353.056418 | 0.199244659 | 0.105747 | 1.884161 | 0.059543 | 0.095328 |
| 11253 | DIP2A     | 750.481517  | 0.199054207 | 0.090507 | 2.19932  | 0.027855 | 0.048519 |
| 14684 | KIAA1524  | 121.1715564 | 0.198783806 | 0.179698 | 1.106208 | 0.268637 | 0.358591 |
| 13620 | C5orf28   | 295.4785628 | 0.198767159 | 0.137215 | 1.448579 | 0.147455 | 0.212208 |
| 11560 | NOP14     | 676.167932  | 0.198755107 | 0.094933 | 2.093641 | 0.036292 | 0.061536 |
| 14582 | MTMR8     | 12.02805308 | 0.198644512 | 0.173925 | 1.142126 | 0.253402 | 0.34062  |
| 14326 | FAM35B    | 312.1907861 | 0.19842882  | 0.162249 | 1.222992 | 0.221333 | 0.30283  |
| 14700 | EPHX1     | 2330.288521 | 0.198328761 | 0.18052  | 1.098655 | 0.271919 | 0.362577 |
| 14962 | TNFRSF14  | 2782.486807 | 0.198294623 | 0.194682 | 1.018556 | 0.308414 | 0.404038 |
| 13267 | BAP1      | 1301.203196 | 0.198171541 | 0.127246 | 1.557388 | 0.119378 | 0.176373 |
| 9583  | MRPS14    | 313.227578  | 0.198140374 | 0.071105 | 2.786583 | 0.005327 | 0.010895 |
| 15880 | BZRAP1    | 269.7392808 | 0.19808939  | 0.264523 | 0.748854 | 0.453945 | 0.560314 |
| 17401 | S100A5    | 2.49506369  | 0.197952961 | 0.579898 | 0.341358 | 0.732834 | 0.825486 |
| 16847 | PDZD9     | 0.734648742 | 0.197871316 | 0.413141 | 0.478944 | 0.631978 | 0.735289 |
| 11284 | ZNF197    | 301.9206707 | 0.197786672 | 0.090551 | 2.184249 | 0.028944 | 0.050277 |
| 10857 | SUN1      | 2571.988599 | 0.197700056 | 0.084567 | 2.337781 | 0.019399 | 0.035022 |
| 12149 | NFU1      | 719.7211838 | 0.197607304 | 0.103371 | 1.911623 | 0.055925 | 0.090228 |
| 12472 | ARF6      | 2785.696975 | 0.196976116 | 0.108762 | 1.811067 | 0.07013  | 0.110217 |
| 10988 | CDC42     | 5549.947579 | 0.196694303 | 0.085861 | 2.290834 | 0.021973 | 0.039197 |
| 17639 | USP9Y     | 348.6768203 | 0.19655277  | 0.696124 | 0.282353 | 0.777673 | 0.864174 |
| 13760 | MDM2      | 2767.756084 | 0.196428494 | 0.140187 | 1.401188 | 0.161158 | 0.229568 |
| 10649 | BICD2     | 983.0890599 | 0.196393899 | 0.081351 | 2.414166 | 0.015771 | 0.029029 |
| 13266 | CCDC109A  | 672.1373212 | 0.196310046 | 0.126034 | 1.5576   | 0.119328 | 0.176311 |

|       |           |             |             |          |          |          |          |
|-------|-----------|-------------|-------------|----------|----------|----------|----------|
| 17336 | LMX1B     | 7.170031436 | 0.19630317  | 0.546958 | 0.3589   | 0.71967  | 0.813697 |
| 13877 | C14orf138 | 111.0891599 | 0.196186776 | 0.14453  | 1.357415 | 0.174649 | 0.246689 |
| 13800 | CRNA0018  | 41.76738765 | 0.196120713 | 0.141425 | 1.386746 | 0.165519 | 0.235063 |
| 13657 | LOC642852 | 285.9460674 | 0.195936619 | 0.136364 | 1.436869 | 0.150755 | 0.216369 |
| 14167 | TCFL5     | 244.3861448 | 0.195707441 | 0.154548 | 1.266319 | 0.205399 | 0.284183 |
| 11244 | CTNNA1    | 10438.36878 | 0.195699284 | 0.08888  | 2.201839 | 0.027677 | 0.048247 |
| 11580 | KLHL18    | 314.0461438 | 0.195508479 | 0.093593 | 2.088915 | 0.036715 | 0.062141 |
| 13887 | PMPCA     | 1020.527937 | 0.195348838 | 0.144455 | 1.352316 | 0.176274 | 0.248805 |
| 14343 | SLC38A7   | 282.45254   | 0.195258464 | 0.16051  | 1.216488 | 0.223799 | 0.305842 |
| 13820 | USP54     | 423.3713254 | 0.194856483 | 0.141259 | 1.379427 | 0.167763 | 0.23794  |
| 13584 | LOC729991 | 284.0918606 | 0.194700178 | 0.133387 | 1.459664 | 0.144382 | 0.208336 |
| 13972 | GCFC1     | 573.5765692 | 0.19448818  | 0.146449 | 1.32803  | 0.184168 | 0.258365 |
| 15016 | LOC284232 | 10.85350973 | 0.194468969 | 0.19357  | 1.004644 | 0.315068 | 0.411272 |
| 11969 | RAB1A     | 4300.432128 | 0.194414978 | 0.09875  | 1.968769 | 0.04898  | 0.080211 |
| 10946 | H2AFV     | 3603.360144 | 0.194339041 | 0.084313 | 2.304965 | 0.021169 | 0.037907 |
| 11676 | POLR3F    | 278.9412475 | 0.194209548 | 0.094421 | 2.056856 | 0.0397   | 0.066646 |
| 14485 | SCPEP1    | 1669.681526 | 0.194205485 | 0.165579 | 1.172888 | 0.240841 | 0.325904 |
| 14410 | ULK3      | 897.3401767 | 0.19414488  | 0.1625   | 1.194736 | 0.23219  | 0.315834 |
| 12991 | MEM185E   | 546.7956858 | 0.194120221 | 0.117833 | 1.647422 | 0.099471 | 0.150084 |
| 11003 | PIGG      | 702.5739752 | 0.194117088 | 0.084831 | 2.288276 | 0.022121 | 0.039408 |
| 15621 | DC1001297 | 13.20967416 | 0.193992556 | 0.233884 | 0.82944  | 0.406856 | 0.510484 |
| 12355 | WHSC1L1   | 877.5405156 | 0.193961544 | 0.104936 | 1.848383 | 0.064547 | 0.102403 |
| 14512 | MKNK2     | 2738.527737 | 0.193869815 | 0.16675  | 1.162634 | 0.244978 | 0.330886 |
| 15106 | NAGLU     | 1243.20423  | 0.193849631 | 0.198968 | 0.974275 | 0.32992  | 0.428093 |
| 13250 | RBMS2     | 1605.070732 | 0.193689612 | 0.123932 | 1.562873 | 0.118082 | 0.174682 |
| 12950 | TGOLN2    | 10584.8208  | 0.19339685  | 0.116663 | 1.657742 | 0.09737  | 0.147378 |
| 13214 | PIGN      | 455.8745499 | 0.193273421 | 0.122692 | 1.575278 | 0.115192 | 0.170871 |
| 13209 | RFC3      | 173.7734146 | 0.193268427 | 0.122545 | 1.577128 | 0.114766 | 0.170303 |
| 13100 | ZNF22     | 929.2801502 | 0.193180301 | 0.119913 | 1.611    | 0.10718  | 0.160369 |
| 16580 | WNT9B     | 5.14814305  | 0.192923586 | 0.349476 | 0.552037 | 0.580923 | 0.686772 |
| 14531 | C5orf35   | 121.6054752 | 0.19276788  | 0.166718 | 1.156252 | 0.247578 | 0.333959 |
| 12529 | ETF1      | 2783.331887 | 0.192586716 | 0.107241 | 1.795831 | 0.072521 | 0.113456 |
| 14890 | HHEX      | 193.343207  | 0.192496422 | 0.185207 | 1.039357 | 0.298639 | 0.393124 |
| 14322 | SEC11C    | 1180.232949 | 0.192449601 | 0.15728  | 1.223608 | 0.2211   | 0.302614 |
| 14930 | ERG       | 820.5433342 | 0.192420971 | 0.187587 | 1.025771 | 0.305    | 0.400422 |
| 12775 | NAA40     | 402.7185698 | 0.192107424 | 0.112215 | 1.711956 | 0.086905 | 0.13334  |
| 14212 | RHGEF10   | 1056.813644 | 0.192098619 | 0.153242 | 1.253566 | 0.21     | 0.289626 |
| 11083 | COQ5      | 752.9847847 | 0.192084968 | 0.084952 | 2.261105 | 0.023753 | 0.042008 |
| 13862 | ZNF25     | 431.4760972 | 0.191871741 | 0.140622 | 1.364447 | 0.172427 | 0.243813 |
| 12515 | RNMTL1    | 314.3532891 | 0.19183263  | 0.106622 | 1.799186 | 0.071989 | 0.11275  |
| 12742 | SLC25A32  | 536.6910741 | 0.191740169 | 0.111488 | 1.719827 | 0.085464 | 0.131469 |
| 15525 | PCDHB14   | 247.3854555 | 0.191641871 | 0.224914 | 0.852067 | 0.394177 | 0.497666 |
| 15298 | PDE5A     | 683.3192872 | 0.191483279 | 0.207855 | 0.921236 | 0.356927 | 0.457323 |
| 11233 | UBAP1     | 1380.375242 | 0.191374731 | 0.086735 | 2.206429 | 0.027354 | 0.047731 |
| 14307 | NBR2      | 132.0934192 | 0.19134604  | 0.15593  | 1.227126 | 0.219775 | 0.301099 |
| 12514 | PPCS      | 1186.685532 | 0.191049881 | 0.106181 | 1.799281 | 0.071974 | 0.112735 |
| 15761 | ST7OT3    | 2.251657607 | 0.190967759 | 0.242694 | 0.786867 | 0.43136  | 0.536456 |

|       |           |             |             |          |          |          |          |
|-------|-----------|-------------|-------------|----------|----------|----------|----------|
| 15845 | PDE6B     | 241.2065412 | 0.190863845 | 0.251042 | 0.760287 | 0.447083 | 0.553062 |
| 16366 | ZDHHC11   | 57.54033847 | 0.190701201 | 0.313075 | 0.609123 | 0.542443 | 0.649665 |
| 11421 | PHF8      | 725.705742  | 0.190682151 | 0.089031 | 2.141748 | 0.032214 | 0.055286 |
| 15384 | TRIM78P   | 14.7065785  | 0.190540787 | 0.21312  | 0.894054 | 0.371293 | 0.47307  |
| 11498 | DFFA      | 394.5276844 | 0.190444081 | 0.089882 | 2.118825 | 0.034105 | 0.05814  |
| 10982 | ATG3      | 872.0602554 | 0.190202545 | 0.082964 | 2.292585 | 0.021872 | 0.039038 |
| 12815 | EXOSC6    | 295.9239297 | 0.190167899 | 0.111819 | 1.700673 | 0.089004 | 0.136135 |
| 13066 | PPIL2     | 1083.810781 | 0.190060059 | 0.117006 | 1.624364 | 0.104298 | 0.156463 |
| 12442 | WDR5      | 783.1952279 | 0.190036187 | 0.10419  | 1.823933 | 0.068162 | 0.107382 |
| 12977 | KLHDC5    | 678.7551579 | 0.189682697 | 0.114928 | 1.65045  | 0.098851 | 0.149286 |
| 14301 | NEK8      | 111.1880806 | 0.189546291 | 0.154182 | 1.229369 | 0.218934 | 0.300071 |
| 14604 | HIST2H4A  | 216.0548489 | 0.189513508 | 0.167382 | 1.132219 | 0.257542 | 0.345665 |
| 15904 | LQK1      | 37.81383952 | 0.189509423 | 0.255618 | 0.741377 | 0.458465 | 0.565038 |
| 13518 | IQCB1     | 420.8487217 | 0.189459729 | 0.127874 | 1.48161  | 0.138444 | 0.200728 |
| 13807 | POLR1A    | 536.5267605 | 0.189351106 | 0.136674 | 1.385422 | 0.165923 | 0.235552 |
| 16734 | COL24A1   | 28.25511227 | 0.189200771 | 0.371166 | 0.509748 | 0.610228 | 0.714728 |
| 12069 | RAB5C     | 2866.131147 | 0.189042913 | 0.097514 | 1.938628 | 0.052547 | 0.08534  |
| 11254 | HNRNPA3   | 4219.161854 | 0.188896604 | 0.085911 | 2.198741 | 0.027896 | 0.048587 |
| 16714 | CXCL11    | 205.1962989 | 0.188856846 | 0.365969 | 0.516046 | 0.605822 | 0.710456 |
| 16232 | DC1002722 | 51.18615678 | 0.188797277 | 0.292498 | 0.645466 | 0.518625 | 0.626267 |
| 13180 | ARHGAP19  | 278.1132288 | 0.188597242 | 0.118892 | 1.586289 | 0.112674 | 0.167566 |
| 13683 | DLEU1     | 149.3509518 | 0.188385748 | 0.132131 | 1.425752 | 0.15394  | 0.22052  |
| 12503 | ZNF639    | 614.5178005 | 0.188317037 | 0.104447 | 1.802985 | 0.071391 | 0.111919 |
| 12261 | PALB2     | 261.2494313 | 0.188307758 | 0.100212 | 1.8791   | 0.060231 | 0.096288 |
| 16008 | HMCN1     | 682.3011647 | 0.188280541 | 0.265486 | 0.709191 | 0.478206 | 0.585539 |
| 12233 | BBS9      | 334.6710388 | 0.188243742 | 0.099757 | 1.88702  | 0.059158 | 0.094789 |
| 12489 | GTF2A2    | 623.1547823 | 0.188207914 | 0.104174 | 1.806677 | 0.070813 | 0.111138 |
| 12824 | ZZEF1     | 1147.429119 | 0.188092679 | 0.110806 | 1.6975   | 0.089602 | 0.136953 |
| 13506 | FAM165B   | 291.2966395 | 0.188066911 | 0.126545 | 1.486166 | 0.137235 | 0.199167 |
| 11715 | MIS12     | 427.8512103 | 0.188024192 | 0.091791 | 2.048389 | 0.040522 | 0.067799 |
| 15937 | VWF       | 20293.81287 | 0.187847111 | 0.256927 | 0.73113  | 0.4647   | 0.571537 |
| 14083 | ATP5L     | 3221.641564 | 0.187846887 | 0.145313 | 1.292709 | 0.196112 | 0.272952 |
| 13855 | UBE2H     | 1456.09256  | 0.187834063 | 0.137452 | 1.366542 | 0.171769 | 0.243006 |
| 12826 | USP27X    | 137.3957327 | 0.187719471 | 0.110624 | 1.69692  | 0.089712 | 0.1371   |
| 10609 | LUC7L2    | 1780.063129 | 0.187386516 | 0.077    | 2.433598 | 0.01495  | 0.027621 |
| 14546 | LRIG1     | 997.9653673 | 0.18736398  | 0.162635 | 1.15205  | 0.2493   | 0.335937 |
| 15735 | SLC16A8   | 6.001180897 | 0.187363115 | 0.235945 | 0.794095 | 0.42714  | 0.532086 |
| 13708 | INO80C    | 328.8945801 | 0.187177266 | 0.132229 | 1.415558 | 0.156905 | 0.224358 |
| 14026 | AIMP2     | 402.3702031 | 0.18715204  | 0.142655 | 1.311924 | 0.189546 | 0.264886 |
| 14657 | NUDT16    | 1168.292042 | 0.187053887 | 0.167817 | 1.114631 | 0.265009 | 0.354412 |
| 13033 | NDUFC2    | 1537.826271 | 0.186966597 | 0.114426 | 1.633946 | 0.10227  | 0.153809 |
| 15713 | ETV3L     | 2.35841669  | 0.186945858 | 0.233619 | 0.800216 | 0.423586 | 0.528363 |
| 13041 | RHBDD1    | 378.5434717 | 0.186892549 | 0.114484 | 1.632471 | 0.10258  | 0.15419  |
| 15606 | RPL21P44  | 3.720481871 | 0.186649446 | 0.223863 | 0.833765 | 0.404413 | 0.507927 |
| 13023 | LIMD1     | 846.6950075 | 0.186606455 | 0.114025 | 1.636538 | 0.101727 | 0.15311  |
| 14449 | NIN       | 1163.921679 | 0.186575154 | 0.15774  | 1.182798 | 0.236889 | 0.321355 |
| 13636 | CFZp761E1 | 437.0872343 | 0.186500564 | 0.129272 | 1.442696 | 0.149106 | 0.214318 |

|       |           |             |             |          |          |          |          |
|-------|-----------|-------------|-------------|----------|----------|----------|----------|
| 16390 | KCNJ12    | 57.88284051 | 0.186363008 | 0.309045 | 0.603029 | 0.54649  | 0.65356  |
| 15694 | GSTM3     | 556.3020913 | 0.186246545 | 0.230395 | 0.808378 | 0.418873 | 0.523151 |
| 14533 | LETMD1    | 1472.508657 | 0.186062582 | 0.160978 | 1.155825 | 0.247753 | 0.33415  |
| 16520 | ALDH1A3   | 743.8925671 | 0.186061269 | 0.328744 | 0.565976 | 0.57141  | 0.677955 |
| 15023 | CDKN2B    | 277.5766345 | 0.185996821 | 0.186077 | 0.99957  | 0.317518 | 0.414277 |
| 11087 | KIAA1267  | 996.105592  | 0.185984239 | 0.082275 | 2.260515 | 0.023789 | 0.042058 |
| 13285 | GTF2IRD2  | 393.417169  | 0.18591222  | 0.120024 | 1.548959 | 0.121391 | 0.179104 |
| 9598  | ZNF2      | 116.6545318 | 0.185811221 | 0.066834 | 2.780198 | 0.005433 | 0.011094 |
| 14446 | SLC9A3R1  | 4462.737188 | 0.185724117 | 0.156886 | 1.183814 | 0.236487 | 0.320877 |
| 12404 | SNRNP200  | 5102.090931 | 0.18547956  | 0.101058 | 1.835383 | 0.066449 | 0.105004 |
| 12860 | CIAPIN1   | 954.2091066 | 0.185468    | 0.109786 | 1.689354 | 0.091152 | 0.138924 |
| 13606 | SPDYE3    | 72.2885808  | 0.18534175  | 0.127432 | 1.45444  | 0.145824 | 0.210077 |
| 14100 | UCKL1     | 553.8987967 | 0.185313175 | 0.143814 | 1.288558 | 0.197552 | 0.274625 |
| 15957 | ABCC6P2   | 106.5777406 | 0.185238975 | 0.255401 | 0.725286 | 0.468277 | 0.575214 |
| 11329 | ZFP161    | 384.0887773 | 0.185164396 | 0.085299 | 2.17078  | 0.029948 | 0.051815 |
| 15822 | TC2N      | 516.7602721 | 0.185005534 | 0.240737 | 0.768496 | 0.442193 | 0.547808 |
| 14058 | RALA      | 1389.190628 | 0.184963422 | 0.142312 | 1.299701 | 0.193704 | 0.27008  |
| 13006 | LOC643387 | 30.89418904 | 0.184412027 | 0.112302 | 1.642108 | 0.100568 | 0.151563 |
| 16881 | PCDHGB1   | 91.79287807 | 0.18434797  | 0.392352 | 0.469853 | 0.63846  | 0.741334 |
| 14158 | PLEKHM1   | 683.8826273 | 0.18411407  | 0.145176 | 1.26821  | 0.204723 | 0.283428 |
| 13332 | TGS1      | 443.6075329 | 0.184043837 | 0.120039 | 1.533206 | 0.125225 | 0.184109 |
| 14096 | BLCAP     | 1574.624721 | 0.183958575 | 0.142667 | 1.289426 | 0.19725  | 0.274283 |
| 12497 | RAF1      | 1694.530323 | 0.183872081 | 0.101852 | 1.805293 | 0.071029 | 0.111406 |
| 13237 | SAPS2     | 1042.502312 | 0.183859416 | 0.117282 | 1.567669 | 0.116958 | 0.173194 |
| 15437 | ZNF843    | 9.129509854 | 0.183855552 | 0.209656 | 0.87694  | 0.380519 | 0.483161 |
| 12088 | TSN       | 1796.837768 | 0.18378806  | 0.095136 | 1.931853 | 0.053378 | 0.086553 |
| 13494 | SLC35A1   | 573.5189985 | 0.183711116 | 0.123316 | 1.489761 | 0.136287 | 0.197967 |
| 10981 | RYK       | 1037.844958 | 0.183661812 | 0.080089 | 2.293227 | 0.021835 | 0.038975 |
| 12634 | NUDT19    | 421.1698347 | 0.183462537 | 0.104009 | 1.76391  | 0.077747 | 0.120622 |
| 12474 | HMGB1     | 4776.501264 | 0.183368388 | 0.101288 | 1.810371 | 0.070238 | 0.110369 |
| 16752 | SPESP1    | 55.44831409 | 0.183325145 | 0.363589 | 0.50421  | 0.614114 | 0.718529 |
| 11521 | PCBP2     | 13373.09602 | 0.183240271 | 0.086829 | 2.11035  | 0.034828 | 0.059254 |
| 14602 | AP1S2     | 701.6633461 | 0.183175708 | 0.161632 | 1.133291 | 0.257092 | 0.345108 |
| 10793 | GPATCH1   | 249.9125977 | 0.183086627 | 0.077446 | 2.364067 | 0.018076 | 0.032827 |
| 12200 | LOC387647 | 494.780941  | 0.182770796 | 0.0964   | 1.895954 | 0.057966 | 0.093131 |
| 11423 | TFCP2     | 505.9469415 | 0.182549962 | 0.085279 | 2.14062  | 0.032305 | 0.055432 |
| 13879 | C14orf79  | 225.9379324 | 0.182412417 | 0.134577 | 1.355453 | 0.175273 | 0.247535 |
| 16146 | HIST1H2B1 | 14.75875765 | 0.182304391 | 0.273442 | 0.666702 | 0.504962 | 0.613017 |
| 14868 | C9orf23   | 369.1387572 | 0.182138944 | 0.174111 | 1.046111 | 0.29551  | 0.389581 |
| 16627 | C14orf132 | 327.9733255 | 0.182067609 | 0.33605  | 0.541787 | 0.587965 | 0.6931   |
| 14113 | NIPAL3    | 1025.324285 | 0.181977485 | 0.141857 | 1.282823 | 0.199554 | 0.277153 |
| 11543 | HNRNPR    | 2116.661336 | 0.181659242 | 0.086497 | 2.100182 | 0.035713 | 0.060643 |
| 10464 | SFPQ      | 3599.007895 | 0.18148132  | 0.072937 | 2.488186 | 0.01284  | 0.024051 |
| 14651 | ARSB      | 1298.593853 | 0.181221523 | 0.162328 | 1.116393 | 0.264254 | 0.35353  |
| 16126 | STON2     | 529.8205925 | 0.1809205   | 0.268504 | 0.673809 | 0.500433 | 0.608272 |
| 10074 | QRICH1    | 962.9228364 | 0.18089463  | 0.068856 | 2.62713  | 0.008611 | 0.016754 |
| 15324 | DC1001339 | 6.400006127 | 0.180874672 | 0.198009 | 0.913466 | 0.360998 | 0.461754 |

|       |           |             |             |          |          |          |          |
|-------|-----------|-------------|-------------|----------|----------|----------|----------|
| 11980 | RIOK1     | 327.7608317 | 0.180857552 | 0.092008 | 1.965682 | 0.049335 | 0.08072  |
| 10436 | DIDO1     | 1621.391839 | 0.180687278 | 0.072315 | 2.49862  | 0.012468 | 0.023417 |
| 10532 | SEC31A    | 5351.219547 | 0.180652126 | 0.073442 | 2.45979  | 0.013902 | 0.025873 |
| 14438 | MALT1     | 1138.307682 | 0.180644854 | 0.152158 | 1.18722  | 0.235141 | 0.319227 |
| 12314 | NSUN3     | 109.5475467 | 0.180613805 | 0.097072 | 1.860621 | 0.062798 | 0.099959 |
| 12985 | BAG3      | 1398.233236 | 0.180434806 | 0.109418 | 1.649036 | 0.09914  | 0.149653 |
| 11036 | DCAF12    | 991.9512717 | 0.180409787 | 0.079184 | 2.278368 | 0.022705 | 0.040326 |
| 14420 | DNAJB5    | 353.8977861 | 0.180375723 | 0.151327 | 1.191958 | 0.233278 | 0.317093 |
| 11842 | UNG       | 903.4516704 | 0.180297006 | 0.089774 | 2.008335 | 0.044608 | 0.073835 |
| 17501 | PROKR1    | 0.445739894 | 0.180266691 | 0.572826 | 0.314697 | 0.752991 | 0.843345 |
| 16260 | IL1RL2    | 57.0926056  | 0.180251979 | 0.282541 | 0.637967 | 0.523495 | 0.63106  |
| 17674 | SPACA5    | 0.289385987 | 0.18017087  | 0.656091 | 0.274613 | 0.783614 | 0.869051 |
| 17781 | TAS2R30   | 0.23647207  | 0.18017073  | 0.723492 | 0.249029 | 0.803338 | 0.885565 |
| 17986 | DC1001317 | 0.354177478 | 0.180170605 | 0.868725 | 0.207397 | 0.8357   | 0.910743 |
| 18093 | MYT1L     | 0.369966744 | 0.180170435 | 0.968396 | 0.18605  | 0.852405 | 0.923451 |
| 18083 | MYH7      | 0.235774733 | 0.180170306 | 0.952433 | 0.189168 | 0.849961 | 0.921261 |
| 18071 | UOX       | 0.198819222 | 0.180170289 | 0.936368 | 0.192414 | 0.847418 | 0.919166 |
| 18273 | PABPC1L2  | 0.138145599 | 0.180169452 | 1.21908  | 0.147791 | 0.882507 | 0.946592 |
| 18344 | DVWA      | 0.179774353 | 0.180169234 | 1.319412 | 0.136553 | 0.891384 | 0.952033 |
| 18350 | MYCNOS    | 0.137936927 | 0.180169143 | 1.316644 | 0.13684  | 0.891157 | 0.952033 |
| 18424 | FGF21     | 0.273432028 | 0.180169119 | 1.445809 | 0.124615 | 0.900829 | 0.958357 |
| 18355 | SNORA59E  | 0.121625071 | 0.180169075 | 1.322047 | 0.13628  | 0.8916   | 0.952033 |
| 18359 | C20orf144 | 0.119322395 | 0.180169067 | 1.324399 | 0.136038 | 0.891791 | 0.952074 |
| 18408 | CABP5     | 0.157578712 | 0.180168829 | 1.425406 | 0.126398 | 0.899417 | 0.957585 |
| 18420 | RFX6      | 0.119991713 | 0.180168667 | 1.43754  | 0.125331 | 0.900261 | 0.957988 |
| 18423 | DC1002718 | 0.116054457 | 0.18016865  | 1.442255 | 0.124922 | 0.900586 | 0.958196 |
| 18474 | OR5C1     | 0.155923346 | 0.18016838  | 1.549168 | 0.1163   | 0.907415 | 0.962771 |
| 18490 | C16orf82  | 0.098171676 | 0.180167993 | 1.592819 | 0.113113 | 0.909941 | 0.964616 |
| 18493 | TAAR8     | 0.096523727 | 0.180167981 | 1.595675 | 0.11291  | 0.910102 | 0.96463  |
| 18542 | TFDP3     | 0.098479517 | 0.180167294 | 1.752546 | 0.102803 | 0.918119 | 0.970735 |
| 18539 | C17orf54  | 0.09669424  | 0.180167278 | 1.756176 | 0.102591 | 0.918288 | 0.970735 |
| 18615 | BPY2      | 0.138832345 | 0.180166842 | 1.890783 | 0.095287 | 0.924087 | 0.973018 |
| 18619 | DKK4      | 0.122226875 | 0.180166669 | 1.905364 | 0.094558 | 0.924666 | 0.973435 |
| 18623 | KRT35     | 0.102541188 | 0.180166419 | 1.934262 | 0.093145 | 0.925789 | 0.974407 |
| 18633 | OR7E5P    | 0.078580794 | 0.180166022 | 1.989381 | 0.090564 | 0.927839 | 0.976027 |
| 18637 | PNLIPRP1  | 0.077225764 | 0.180165999 | 1.993721 | 0.090367 | 0.927996 | 0.976045 |
| 18635 | ACTRT1    | 0.076698919 | 0.18016599  | 1.995433 | 0.090289 | 0.928057 | 0.976045 |
| 18704 | OR51F2    | 0.078178336 | 0.180164632 | 2.235752 | 0.080583 | 0.935773 | 0.980651 |
| 18705 | FKSG83    | 0.076567916 | 0.180164593 | 2.242141 | 0.080354 | 0.935956 | 0.980779 |
| 18778 | tAKR      | 0.102520311 | 0.180163434 | 2.454698 | 0.073395 | 0.941492 | 0.982755 |
| 18801 | C1orf185  | 0.061426867 | 0.180161876 | 2.629132 | 0.068525 | 0.945368 | 0.985142 |
| 18800 | C16orf90  | 0.061290425 | 0.180161869 | 2.630049 | 0.068501 | 0.945387 | 0.985142 |
| 18811 | C17orf77  | 0.060715406 | 0.180161841 | 2.633938 | 0.0684   | 0.945467 | 0.985171 |
| 18814 | PRAMEF1c  | 0.056768509 | 0.180161639 | 2.661975 | 0.06768  | 0.946041 | 0.985614 |
| 18923 | PTPN20A   | 0.171380058 | 0.180161191 | 2.91407  | 0.061825 | 0.950703 | 0.986718 |
| 18876 | DC1001285 | 0.079041261 | 0.180159966 | 2.91407  | 0.061824 | 0.950703 | 0.986718 |
| 18889 | MBD3L1    | 0.061565997 | 0.180159721 | 2.91407  | 0.061824 | 0.950703 | 0.986718 |

|       |           |             |             |          |          |          |          |
|-------|-----------|-------------|-------------|----------|----------|----------|----------|
| 18890 | MC5R      | 0.058089788 | 0.180159721 | 2.91407  | 0.061824 | 0.950703 | 0.986718 |
| 18843 | CTRB1     | 0.059156586 | 0.180159721 | 2.91407  | 0.061824 | 0.950703 | 0.986718 |
| 18841 | CRISP1    | 0.040020147 | 0.180159476 | 2.91407  | 0.061824 | 0.950703 | 0.986718 |
| 18846 | CXorf66   | 0.039936512 | 0.180159476 | 2.91407  | 0.061824 | 0.950703 | 0.986718 |
| 18856 | FBP2      | 0.040130368 | 0.180159476 | 2.91407  | 0.061824 | 0.950703 | 0.986718 |
| 18874 | KRTAP26-1 | 0.041183851 | 0.180159476 | 2.91407  | 0.061824 | 0.950703 | 0.986718 |
| 18898 | OR11G2    | 0.03812668  | 0.180159476 | 2.91407  | 0.061824 | 0.950703 | 0.986718 |
| 18910 | OR8B3     | 0.041344487 | 0.180159476 | 2.91407  | 0.061824 | 0.950703 | 0.986718 |
| 18912 | OTOR      | 0.043403309 | 0.180159476 | 2.91407  | 0.061824 | 0.950703 | 0.986718 |
| 18915 | PATE3     | 0.040061612 | 0.180159476 | 2.91407  | 0.061824 | 0.950703 | 0.986718 |
| 18956 | UNCX      | 0.03940046  | 0.180159476 | 2.91407  | 0.061824 | 0.950703 | 0.986718 |
| 18833 | C13orf28  | 0.021513198 | 0.18015923  | 2.91407  | 0.061824 | 0.950703 | 0.986718 |
| 18849 | DEFB121   | 0.021626811 | 0.18015923  | 2.91407  | 0.061824 | 0.950703 | 0.986718 |
| 18851 | EDDM3B    | 0.020928677 | 0.18015923  | 2.91407  | 0.061824 | 0.950703 | 0.986718 |
| 18865 | IL9       | 0.02193968  | 0.18015923  | 2.91407  | 0.061824 | 0.950703 | 0.986718 |
| 18873 | KRTAP10-2 | 0.020892739 | 0.18015923  | 2.91407  | 0.061824 | 0.950703 | 0.986718 |
| 18899 | OR13C4    | 0.021066752 | 0.18015923  | 2.91407  | 0.061824 | 0.950703 | 0.986718 |
| 18902 | OR4D10    | 0.021135509 | 0.18015923  | 2.91407  | 0.061824 | 0.950703 | 0.986718 |
| 18906 | OR5K4     | 0.021626811 | 0.18015923  | 2.91407  | 0.061824 | 0.950703 | 0.986718 |
| 18919 | PRAMEF9   | 0.020997434 | 0.18015923  | 2.91407  | 0.061824 | 0.950703 | 0.986718 |
| 18920 | PRB1      | 0.021626811 | 0.18015923  | 2.91407  | 0.061824 | 0.950703 | 0.986718 |
| 18939 | SNORA2B   | 0.021738035 | 0.18015923  | 2.91407  | 0.061824 | 0.950703 | 0.986718 |
| 18948 | TBC1D21   | 0.021764886 | 0.18015923  | 2.91407  | 0.061824 | 0.950703 | 0.986718 |
| 18953 | TRIM60    | 0.023367094 | 0.18015923  | 2.91407  | 0.061824 | 0.950703 | 0.986718 |
| 18962 | ZP4       | 0.021202422 | 0.18015923  | 2.91407  | 0.061824 | 0.950703 | 0.986718 |
| 19613 | BHLHE23   | 0.01877631  | 0.18015923  | 2.91407  | 0.061824 | 0.950703 | NA       |
| 19684 | DAZ3      | 0.019037914 | 0.18015923  | 2.91407  | 0.061824 | 0.950703 | NA       |
| 19716 | ESX1      | 0.020258979 | 0.18015923  | 2.91407  | 0.061824 | 0.950703 | NA       |
| 19854 | LCE1D     | 0.020534354 | 0.18015923  | 2.91407  | 0.061824 | 0.950703 | NA       |
| 20202 | SNORA4    | 0.018957247 | 0.18015923  | 2.91407  | 0.061824 | 0.950703 | NA       |
| 12823 | SCARB2    | 7597.948842 | 0.180153197 | 0.106103 | 1.697903 | 0.089526 | 0.136848 |
| 14538 | CYB5R4    | 358.0733555 | 0.180142143 | 0.156129 | 1.153801 | 0.248582 | 0.335153 |
| 15102 | TLR4      | 966.2982181 | 0.180133849 | 0.184682 | 0.975372 | 0.329376 | 0.427499 |
| 12024 | ERP44     | 1812.064204 | 0.180085218 | 0.092121 | 1.95488  | 0.050597 | 0.082481 |
| 14359 | HAGH      | 905.5641572 | 0.18000391  | 0.148689 | 1.210609 | 0.226045 | 0.308549 |
| 13442 | BTBD6     | 906.5569053 | 0.179952521 | 0.119765 | 1.502547 | 0.132956 | 0.193875 |
| 13689 | C9orf21   | 246.0236277 | 0.179844813 | 0.126418 | 1.422618 | 0.154847 | 0.221722 |
| 13120 | SRRM2     | 10233.62904 | 0.179483295 | 0.111873 | 1.604355 | 0.108636 | 0.1623   |
| 12667 | PPIL1     | 432.150211  | 0.17929651  | 0.102404 | 1.750866 | 0.079969 | 0.123745 |
| 17170 | HCN4      | 10.80054099 | 0.179268216 | 0.455203 | 0.39382  | 0.693714 | 0.791933 |
| 14150 | CCNJ      | 164.1198278 | 0.1791551   | 0.14091  | 1.271414 | 0.203581 | 0.282007 |
| 14406 | TMEM67    | 241.3396798 | 0.17911533  | 0.149699 | 1.196499 | 0.231502 | 0.314984 |
| 16904 | GSTO2     | 120.6911105 | 0.179058876 | 0.385812 | 0.46411  | 0.642569 | 0.74509  |
| 12918 | LOC653566 | 1815.256156 | 0.178996929 | 0.107297 | 1.668233 | 0.095269 | 0.144556 |
| 16282 | KCNMA1    | 1374.824983 | 0.178955365 | 0.282779 | 0.632844 | 0.526835 | 0.634201 |
| 17581 | TEX15     | 112.2730405 | 0.178644488 | 0.601044 | 0.297224 | 0.766296 | 0.854381 |
| 12583 | TAOK2     | 1594.319815 | 0.178529654 | 0.100404 | 1.77811  | 0.075386 | 0.117431 |

|       |           |             |             |          |          |          |          |
|-------|-----------|-------------|-------------|----------|----------|----------|----------|
| 8899  | HMG20A    | 910.5558934 | 0.178510024 | 0.058482 | 3.052419 | 0.00227  | 0.005    |
| 11963 | RAD1      | 464.4464667 | 0.178345344 | 0.09052  | 1.97023  | 0.048812 | 0.079977 |
| 15350 | ZBTB42    | 298.2173787 | 0.177983416 | 0.19661  | 0.905261 | 0.365327 | 0.4665   |
| 12371 | SIAH2     | 752.6940636 | 0.177920573 | 0.096521 | 1.843342 | 0.065279 | 0.10343  |
| 13070 | UCK1      | 807.4934669 | 0.177816424 | 0.109583 | 1.622664 | 0.104661 | 0.156969 |
| 13945 | CEP120    | 709.7559529 | 0.17767401  | 0.133013 | 1.335764 | 0.181626 | 0.255293 |
| 15847 | C6orf163  | 8.506333216 | 0.177462208 | 0.233467 | 0.760118 | 0.447184 | 0.553118 |
| 13487 | ACVR1     | 1067.434136 | 0.17742967  | 0.118986 | 1.49118  | 0.135914 | 0.197513 |
| 12881 | PPIL5     | 103.0421914 | 0.177408204 | 0.105587 | 1.680207 | 0.092917 | 0.141392 |
| 14718 | HCG26     | 124.4073752 | 0.177364653 | 0.162342 | 1.09254  | 0.274596 | 0.365699 |
| 16315 | SLC14A1   | 136.6944753 | 0.17736205  | 0.28408  | 0.624338 | 0.532406 | 0.639638 |
| 16924 | COL9A3    | 14.17791342 | 0.177305316 | 0.386169 | 0.459139 | 0.646134 | 0.748338 |
| 14834 | TUBB2C    | 4278.40658  | 0.177277477 | 0.167815 | 1.056389 | 0.290791 | 0.384238 |
| 15486 | GNA14     | 122.760234  | 0.177183782 | 0.204688 | 0.865627 | 0.386695 | 0.489448 |
| 11845 | NUP50     | 1215.63785  | 0.176930917 | 0.088133 | 2.007549 | 0.044691 | 0.073955 |
| 15583 | GPR3      | 70.69043713 | 0.176747871 | 0.210422 | 0.839968 | 0.400926 | 0.504303 |
| 13169 | CYB561D1  | 383.0876646 | 0.176603321 | 0.111108 | 1.58947  | 0.111954 | 0.166635 |
| 16784 | MIP       | 1.293905526 | 0.176210038 | 0.356683 | 0.494024 | 0.621289 | 0.725566 |
| 13268 | PANK4     | 340.6126172 | 0.17618031  | 0.113131 | 1.55731  | 0.119397 | 0.176387 |
| 13233 | WDR3      | 654.8998133 | 0.176179488 | 0.112263 | 1.569352 | 0.116566 | 0.17266  |
| 12895 | ALG14     | 220.7207467 | 0.176143251 | 0.105234 | 1.67383  | 0.094164 | 0.143134 |
| 14552 | SLC35F2   | 447.4265768 | 0.176102143 | 0.153085 | 1.150356 | 0.249997 | 0.336737 |
| 13812 | ZNF738    | 137.4518467 | 0.176044867 | 0.127311 | 1.382795 | 0.166728 | 0.236625 |
| 15134 | APOL6     | 2771.776427 | 0.175887276 | 0.182515 | 0.963689 | 0.335202 | 0.434084 |
| 12739 | ZNF324    | 138.8103342 | 0.175692284 | 0.102106 | 1.720677 | 0.085309 | 0.131262 |
| 14155 | TESK2     | 71.06562122 | 0.175640755 | 0.138309 | 1.269912 | 0.204116 | 0.282648 |
| 12487 | QTRTD1    | 444.3508546 | 0.175542265 | 0.097131 | 1.80727  | 0.07072  | 0.11101  |
| 16444 | ELAVL4    | 1.692609874 | 0.175508011 | 0.298358 | 0.588247 | 0.556367 | 0.663181 |
| 15432 | L3MBTL    | 114.3741671 | 0.175476421 | 0.199594 | 0.879166 | 0.379311 | 0.481783 |
| 13055 | IP6K1     | 1114.037421 | 0.175393613 | 0.107729 | 1.628108 | 0.103502 | 0.1554   |
| 13221 | LOC72864C | 35.03533405 | 0.17502234  | 0.111237 | 1.573421 | 0.115621 | 0.171416 |
| 11021 | ZNF200    | 202.902675  | 0.174859995 | 0.076583 | 2.283288 | 0.022413 | 0.039863 |
| 18251 | ARHGDI3   | 0.674247772 | 0.174848099 | 1.145918 | 0.152583 | 0.878727 | 0.943673 |
| 13684 | CBL       | 1019.449359 | 0.174828248 | 0.122654 | 1.425376 | 0.154049 | 0.22066  |
| 15032 | CD83      | 371.3781002 | 0.174812083 | 0.175491 | 0.996133 | 0.319186 | 0.416147 |
| 15147 | RILP      | 264.8199554 | 0.174590832 | 0.181694 | 0.960906 | 0.336599 | 0.435577 |
| 11556 | PRKRA     | 867.2482675 | 0.17451489  | 0.083273 | 2.095693 | 0.036109 | 0.061248 |
| 15423 | TMCC2     | 82.36371144 | 0.174354936 | 0.197465 | 0.882968 | 0.377254 | 0.479449 |
| 12763 | PAPD4     | 1114.127921 | 0.174190552 | 0.101568 | 1.715016 | 0.086342 | 0.132602 |
| 14519 | ABCG1     | 1414.306548 | 0.173989533 | 0.149875 | 1.160895 | 0.245685 | 0.33168  |
| 16147 | ABCA10    | 17.98778325 | 0.173969347 | 0.261084 | 0.666336 | 0.505197 | 0.613244 |
| 14658 | STIM1     | 1869.654541 | 0.173937337 | 0.156122 | 1.114109 | 0.265232 | 0.354674 |
| 13510 | SUPT3H    | 132.3656432 | 0.173852919 | 0.117087 | 1.484824 | 0.13759  | 0.199625 |
| 14927 | ATP8B5P   | 27.44441413 | 0.173779013 | 0.169262 | 1.026689 | 0.304567 | 0.399934 |
| 15458 | C6orf124  | 24.52317439 | 0.173740591 | 0.199015 | 0.873001 | 0.382663 | 0.485222 |
| 16322 | ACOT6     | 9.531111783 | 0.173621387 | 0.279217 | 0.621816 | 0.534063 | 0.641353 |
| 14156 | CCDC45    | 483.624048  | 0.173517697 | 0.136718 | 1.269168 | 0.204381 | 0.282995 |



|       |           |             |             |          |          |          |          |
|-------|-----------|-------------|-------------|----------|----------|----------|----------|
| 14897 | TINAGL1   | 2502.337339 | 0.173412022 | 0.167152 | 1.037454 | 0.299524 | 0.394123 |
| 12405 | 44076     | 8910.730522 | 0.173399165 | 0.094516 | 1.834597 | 0.066565 | 0.105179 |
| 12461 | UPF3A     | 530.34163   | 0.173171814 | 0.095403 | 1.815157 | 0.0695   | 0.109322 |
| 14493 | LOC645332 | 100.1231795 | 0.173119606 | 0.147965 | 1.170006 | 0.241999 | 0.32729  |
| 14137 | PTPN23    | 1052.978524 | 0.17270723  | 0.135311 | 1.276374 | 0.201823 | 0.279829 |
| 15637 | HIST1H2BM | 10.43643593 | 0.172684434 | 0.209351 | 0.824854 | 0.409454 | 0.513252 |
| 15896 | PTER      | 1194.38686  | 0.172481907 | 0.231905 | 0.743761 | 0.457021 | 0.563542 |
| 12485 | KIAA1967  | 1539.836781 | 0.172378962 | 0.095345 | 1.807946 | 0.070615 | 0.110863 |
| 14598 | LBR       | 1111.663382 | 0.172234185 | 0.151583 | 1.136236 | 0.255858 | 0.343545 |
| 15487 | DCI       | 1444.796006 | 0.172220816 | 0.199    | 0.865433 | 0.386801 | 0.489552 |
| 12769 | ZBTB39    | 175.5520639 | 0.172132334 | 0.100455 | 1.713529 | 0.086615 | 0.132958 |
| 17682 | ASCL1     | 3.019563794 | 0.171743161 | 0.629844 | 0.272676 | 0.785103 | 0.870308 |
| 16654 | GOLT1A    | 193.2315706 | 0.171690575 | 0.322006 | 0.533191 | 0.593902 | 0.698995 |
| 13146 | PPT2      | 475.1967113 | 0.17161799  | 0.107535 | 1.595921 | 0.110506 | 0.164768 |
| 16779 | CDH8      | 20.21211243 | 0.171560128 | 0.345763 | 0.496179 | 0.619768 | 0.724005 |
| 11993 | COG7      | 604.1022844 | 0.171471923 | 0.087375 | 1.962481 | 0.049706 | 0.081232 |
| 15424 | KLHL25    | 147.8540403 | 0.171306251 | 0.194117 | 0.882489 | 0.377513 | 0.479747 |
| 12356 | POGK      | 1268.642904 | 0.17124593  | 0.092655 | 1.848211 | 0.064572 | 0.102434 |
| 13097 | MAP1LC3E  | 2769.351929 | 0.171218629 | 0.106188 | 1.61241  | 0.106873 | 0.159946 |
| 16238 | RAMP3     | 1182.356829 | 0.170936018 | 0.265086 | 0.644832 | 0.519036 | 0.626532 |
| 10334 | WDR45L    | 2040.549793 | 0.170855794 | 0.067381 | 2.535675 | 0.011223 | 0.021287 |
| 12104 | UBE2A     | 1353.128754 | 0.170825677 | 0.088597 | 1.928116 | 0.053841 | 0.087189 |
| 14515 | GGT7      | 414.5162441 | 0.170549436 | 0.146856 | 1.161335 | 0.245506 | 0.331484 |
| 12457 | OPTN      | 3470.774689 | 0.170488041 | 0.093787 | 1.817824 | 0.069091 | 0.108718 |
| 12245 | COPS8     | 1446.044973 | 0.170484026 | 0.090501 | 1.883772 | 0.059596 | 0.095397 |
| 13171 | PSMD12    | 816.6955315 | 0.170060129 | 0.107026 | 1.588968 | 0.112068 | 0.166788 |
| 13788 | EIF2A     | 2531.763578 | 0.169891662 | 0.122288 | 1.38928  | 0.164748 | 0.234188 |
| 12259 | ANKRA2    | 264.895212  | 0.169857784 | 0.090346 | 1.880079 | 0.060097 | 0.09609  |
| 15685 | BAIAP2    | 793.6167977 | 0.169771821 | 0.209251 | 0.811332 | 0.417175 | 0.521329 |
| 14574 | TMEM20    | 88.56205867 | 0.169584855 | 0.148144 | 1.14473  | 0.252321 | 0.339354 |
| 13721 | INPP1     | 551.222812  | 0.169253281 | 0.119976 | 1.410729 | 0.158325 | 0.226173 |
| 15786 | RNF148    | 2.897304621 | 0.169235067 | 0.217001 | 0.779881 | 0.435461 | 0.540726 |
| 16299 | OC1001339 | 14.69587965 | 0.16903644  | 0.2694   | 0.627455 | 0.530361 | 0.637806 |
| 15500 | CD34      | 3892.57085  | 0.169027899 | 0.196338 | 0.860903 | 0.389292 | 0.492291 |
| 12771 | ZNF652    | 882.625885  | 0.168991584 | 0.098648 | 1.713073 | 0.086699 | 0.133066 |
| 16820 | HAPLN2    | 5.518179091 | 0.168916102 | 0.348063 | 0.485304 | 0.627461 | 0.731161 |
| 14606 | WIPI2     | 1895.950371 | 0.16884171  | 0.14917  | 1.131878 | 0.257686 | 0.345786 |
| 12509 | KIAA0141  | 1426.737585 | 0.168735794 | 0.093703 | 1.800749 | 0.071742 | 0.112417 |
| 15264 | ZNF710    | 246.1135133 | 0.168630805 | 0.181327 | 0.92998  | 0.352382 | 0.452505 |
| 10126 | SNW1      | 1178.097366 | 0.168448998 | 0.064616 | 2.606934 | 0.009136 | 0.017684 |
| 14327 | TSPAN6    | 1127.302537 | 0.168302598 | 0.137651 | 1.222672 | 0.221453 | 0.302974 |
| 15043 | LOC338758 | 35.49719493 | 0.168261282 | 0.16934  | 0.99363  | 0.320403 | 0.417457 |
| 12459 | POGZ      | 1742.535441 | 0.168212376 | 0.092634 | 1.815872 | 0.06939  | 0.109167 |
| 13538 | G3BP1     | 2273.764694 | 0.168199115 | 0.114121 | 1.47387  | 0.140517 | 0.203439 |
| 9405  | WDR33     | 1228.658461 | 0.168137423 | 0.058867 | 2.856217 | 0.004287 | 0.008935 |
| 14839 | MORN2     | 352.0232789 | 0.168034152 | 0.159294 | 1.054867 | 0.291486 | 0.385027 |
| 12500 | BRD8      | 929.2668954 | 0.168028775 | 0.093121 | 1.804419 | 0.071166 | 0.111594 |

|       |           |             |             |          |          |          |          |
|-------|-----------|-------------|-------------|----------|----------|----------|----------|
| 13950 | WDR19     | 446.8031438 | 0.167970446 | 0.125914 | 1.334006 | 0.182202 | 0.25601  |
| 11538 | ZCCHC3    | 582.4792498 | 0.167844047 | 0.079785 | 2.103709 | 0.035404 | 0.060145 |
| 14353 | UBE2V2    | 744.4101804 | 0.16783384  | 0.138381 | 1.212835 | 0.225193 | 0.307562 |
| 12976 | COMMD3    | 664.6334565 | 0.167729499 | 0.101625 | 1.650476 | 0.098846 | 0.149286 |
| 14187 | TRAP1     | 2227.244443 | 0.167709278 | 0.132972 | 1.261234 | 0.207224 | 0.286319 |
| 17693 | GRM4      | 3.29657219  | 0.167564389 | 0.623113 | 0.268915 | 0.787995 | 0.872954 |
| 14595 | CRNA0012  | 32.7409342  | 0.167258117 | 0.147113 | 1.136936 | 0.255565 | 0.343222 |
| 13651 | PSEN2     | 469.0914637 | 0.167251475 | 0.116329 | 1.437749 | 0.150505 | 0.21611  |
| 11756 | GTF2B     | 474.3142246 | 0.167107895 | 0.082089 | 2.035704 | 0.04178  | 0.069661 |
| 10333 | CSTF1     | 638.4679781 | 0.166962777 | 0.065843 | 2.535762 | 0.01122  | 0.021284 |
| 12900 | 1PHOSPH1  | 678.4456959 | 0.166844422 | 0.099711 | 1.673273 | 0.094273 | 0.143245 |
| 12711 | UPF1      | 2033.706613 | 0.166823318 | 0.096507 | 1.728614 | 0.083878 | 0.129334 |
| 13008 | C10orf119 | 1336.685596 | 0.166809012 | 0.101657 | 1.6409   | 0.100818 | 0.151912 |
| 14779 | ZBTB46    | 257.2715392 | 0.166741903 | 0.155142 | 1.074767 | 0.282479 | 0.374661 |
| 13002 | MAPK9     | 1204.887295 | 0.166558201 | 0.101334 | 1.643662 | 0.100246 | 0.151124 |
| 15181 | MR1       | 362.3221122 | 0.166394436 | 0.174626 | 0.952861 | 0.340661 | 0.439794 |
| 14553 | MBTPS2    | 840.1258113 | 0.166286216 | 0.14456  | 1.150291 | 0.250024 | 0.33675  |
| 13469 | ZC3HAV1   | 1161.219955 | 0.166239395 | 0.111048 | 1.497006 | 0.134392 | 0.195576 |
| 13106 | CUL4B     | 2079.670833 | 0.166235129 | 0.103357 | 1.608352 | 0.107758 | 0.161148 |
| 14139 | WIPI1     | 683.2280147 | 0.166216771 | 0.130307 | 1.275582 | 0.202103 | 0.280177 |
| 16614 | S100A14   | 53.88527809 | 0.166176366 | 0.304909 | 0.545004 | 0.585751 | 0.691062 |
| 14842 | EID3      | 47.62883721 | 0.166158499 | 0.157679 | 1.053776 | 0.291986 | 0.385609 |
| 14603 | ARHGEF17  | 2638.014833 | 0.166034143 | 0.14658  | 1.132724 | 0.25733  | 0.345404 |
| 13514 | TBCE      | 422.3925135 | 0.166008004 | 0.111935 | 1.483073 | 0.138055 | 0.200238 |
| 14428 | ZC4H2     | 176.3165436 | 0.165900244 | 0.139515 | 1.189122 | 0.234392 | 0.31843  |
| 12891 | RPS6KB1   | 777.7288927 | 0.165311918 | 0.09864  | 1.675914 | 0.093755 | 0.142556 |
| 11849 | 2ALCOCO   | 2841.206464 | 0.165262192 | 0.082356 | 2.006692 | 0.044782 | 0.074076 |
| 12956 | ZMYM2     | 1141.500157 | 0.165151598 | 0.099808 | 1.654692 | 0.097987 | 0.148243 |
| 12565 | ZNF174    | 211.7992491 | 0.165027835 | 0.092527 | 1.78356  | 0.074495 | 0.11621  |
| 12935 | MTIF2     | 809.0985447 | 0.164966575 | 0.099155 | 1.663717 | 0.096169 | 0.145729 |
| 14370 | MRPS2     | 895.9622286 | 0.164811275 | 0.136567 | 1.206815 | 0.227504 | 0.31032  |
| 11968 | XPC       | 1020.084321 | 0.164775472 | 0.083681 | 1.969091 | 0.048943 | 0.080158 |
| 12531 | DCP1A     | 613.389341  | 0.164609949 | 0.09169  | 1.795297 | 0.072606 | 0.113571 |
| 14398 | LATS2     | 982.4588124 | 0.164551189 | 0.137345 | 1.198086 | 0.230884 | 0.314318 |
| 15469 | CCDC138   | 30.36951989 | 0.164402695 | 0.188901 | 0.87031  | 0.384131 | 0.48673  |
| 16082 | P2RY1     | 93.37798267 | 0.164230643 | 0.238939 | 0.687334 | 0.491872 | 0.599502 |
| 13155 | ZNF193    | 154.7360042 | 0.163957894 | 0.102918 | 1.593086 | 0.111141 | 0.165606 |
| 14350 | EIF2AK2   | 404.6901111 | 0.163889758 | 0.135136 | 1.212778 | 0.225215 | 0.307562 |
| 12039 | FBXL14    | 618.8501361 | 0.163833354 | 0.084114 | 1.947758 | 0.051444 | 0.083757 |
| 14111 | OC1001305 | 44.96653395 | 0.163595857 | 0.127461 | 1.283496 | 0.199318 | 0.276865 |
| 15681 | NUDT14    | 516.3215383 | 0.163168074 | 0.200797 | 0.8126   | 0.416447 | 0.520552 |
| 12853 | C12orf4   | 445.4795851 | 0.16301889  | 0.096432 | 1.690501 | 0.090932 | 0.138673 |
| 10728 | TBP       | 215.122491  | 0.162840456 | 0.068201 | 2.38767  | 0.016956 | 0.030979 |
| 14209 | MRPL13    | 672.1689615 | 0.162770974 | 0.129797 | 1.25404  | 0.209828 | 0.289452 |
| 14317 | TRIM38    | 1121.916142 | 0.162647671 | 0.132724 | 1.225456 | 0.220403 | 0.301748 |
| 14524 | 43899     | 462.7481501 | 0.1622021   | 0.13987  | 1.159659 | 0.246188 | 0.332245 |
| 13622 | ATPAF2    | 299.9770943 | 0.162138537 | 0.111944 | 1.44839  | 0.147508 | 0.212253 |

|       |           |             |             |          |          |          |          |
|-------|-----------|-------------|-------------|----------|----------|----------|----------|
| 16596 | BET3L     | 2.236217315 | 0.161930024 | 0.295345 | 0.548273 | 0.583504 | 0.688909 |
| 14427 | LOC72902C | 27.87313254 | 0.161922634 | 0.136161 | 1.189197 | 0.234362 | 0.318412 |
| 13857 | PHF1      | 1204.879824 | 0.161794641 | 0.118447 | 1.365966 | 0.171949 | 0.243226 |
| 12716 | PAK1      | 1223.073781 | 0.161348778 | 0.093395 | 1.727598 | 0.08406  | 0.129574 |
| 14027 | SUMO1P3   | 161.6498241 | 0.16118296  | 0.122874 | 1.31177  | 0.189598 | 0.26494  |
| 11532 | TBCCD1    | 284.7984812 | 0.16118292  | 0.076497 | 2.107053 | 0.035113 | 0.059682 |
| 12539 | FAM53C    | 933.5476257 | 0.161172077 | 0.089848 | 1.793836 | 0.072839 | 0.11386  |
| 16827 | TSPAN10   | 23.20759632 | 0.161158902 | 0.332994 | 0.483969 | 0.628408 | 0.732004 |
| 12923 | TERF1     | 593.9859284 | 0.16112933  | 0.096711 | 1.666095 | 0.095694 | 0.145145 |
| 16715 | TIMP4     | 52.63902387 | 0.16097291  | 0.311959 | 0.516006 | 0.60585  | 0.710456 |
| 11886 | NFYA      | 633.8580682 | 0.160876382 | 0.080737 | 1.992603 | 0.046305 | 0.076361 |
| 10024 | PTPRA     | 1944.476565 | 0.160698021 | 0.06078  | 2.643924 | 0.008195 | 0.016025 |
| 15364 | FAM115A   | 321.4020021 | 0.160529047 | 0.178165 | 0.901013 | 0.367581 | 0.468951 |
| 17148 | KLB       | 29.11987096 | 0.160280521 | 0.402119 | 0.39859  | 0.690195 | 0.788927 |
| 13745 | ABII      | 1339.953661 | 0.160224037 | 0.114155 | 1.40356  | 0.16045  | 0.228809 |
| 15459 | LEKR1     | 18.89032753 | 0.160048247 | 0.183366 | 0.872834 | 0.382753 | 0.485306 |
| 15704 | ICA1L     | 124.0019593 | 0.159682926 | 0.198596 | 0.804058 | 0.421364 | 0.525927 |
| 15819 | PI4KAP1   | 292.1025301 | 0.159665632 | 0.207226 | 0.770492 | 0.441008 | 0.546444 |
| 14487 | FAM117A   | 257.3487274 | 0.159635723 | 0.136154 | 1.172464 | 0.241011 | 0.326088 |
| 12594 | SCAMP2    | 2592.684249 | 0.159617952 | 0.089912 | 1.775269 | 0.075853 | 0.118056 |
| 16987 | CXCL14    | 9575.495943 | 0.159581934 | 0.360796 | 0.442305 | 0.658268 | 0.759564 |
| 14737 | FYN       | 1167.38948  | 0.159524708 | 0.146633 | 1.087919 | 0.276631 | 0.367934 |
| 13003 | ACOT13    | 781.8876132 | 0.159494158 | 0.097044 | 1.643531 | 0.100273 | 0.151154 |
| 15224 | JAG1      | 3946.782007 | 0.159390987 | 0.169495 | 0.940388 | 0.347018 | 0.446789 |
| 14941 | WBP11P1   | 8.477398222 | 0.159276959 | 0.155491 | 1.02435  | 0.30567  | 0.401055 |
| 14961 | TRPS1     | 467.7814314 | 0.159260774 | 0.156339 | 1.018686 | 0.308352 | 0.403984 |
| 15325 | CLCN2     | 113.8087742 | 0.159237972 | 0.174498 | 0.912548 | 0.36148  | 0.462341 |
| 14526 | BTN2A2    | 536.6955212 | 0.159229786 | 0.13747  | 1.158287 | 0.246747 | 0.332954 |
| 15821 | FBXO17    | 2292.106724 | 0.159228214 | 0.207038 | 0.769077 | 0.441847 | 0.547415 |
| 13122 | SETD1B    | 773.1200789 | 0.15905448  | 0.099166 | 1.60392  | 0.108732 | 0.162418 |
| 13274 | MTIF3     | 911.1981196 | 0.158977571 | 0.102411 | 1.552349 | 0.120579 | 0.178052 |
| 13843 | SPCS1     | 1436.695184 | 0.158872311 | 0.115924 | 1.370485 | 0.170536 | 0.24147  |
| 14605 | C16orf61  | 446.0877735 | 0.158653968 | 0.140136 | 1.132139 | 0.257576 | 0.345686 |
| 17844 | LRFN2     | 1.465168313 | 0.158576118 | 0.670079 | 0.236653 | 0.812926 | 0.892979 |
| 16938 | C2orf62   | 17.29316647 | 0.158411372 | 0.349516 | 0.453231 | 0.650382 | 0.752636 |
| 13135 | SAFB2     | 1481.097151 | 0.158169574 | 0.098981 | 1.597985 | 0.110046 | 0.164219 |
| 13365 | RPAP2     | 221.509565  | 0.157898807 | 0.103741 | 1.522052 | 0.127996 | 0.187718 |
| 13733 | SLC37A3   | 895.4811143 | 0.157894839 | 0.112262 | 1.406485 | 0.15958  | 0.227767 |
| 13464 | SUB1      | 2860.931375 | 0.157716592 | 0.10531  | 1.497638 | 0.134227 | 0.195409 |
| 17992 | REG4      | 0.55580467  | 0.157401241 | 0.761132 | 0.206799 | 0.836167 | 0.910944 |
| 16435 | PCDHA7    | 33.52972058 | 0.157374336 | 0.265449 | 0.59286  | 0.553275 | 0.659856 |
| 15625 | RTTN      | 262.1149218 | 0.157307464 | 0.189982 | 0.828011 | 0.407664 | 0.5114   |
| 16806 | QPCT      | 765.9087177 | 0.157267323 | 0.321707 | 0.488853 | 0.624946 | 0.72888  |
| 13182 | AMBRA1    | 842.3100492 | 0.157253647 | 0.099219 | 1.584921 | 0.112984 | 0.168002 |
| 12880 | HMGXB4    | 435.8929741 | 0.157208195 | 0.093557 | 1.68035  | 0.092889 | 0.141361 |
| 14340 | LRRC8D    | 858.130694  | 0.157171082 | 0.12914  | 1.217059 | 0.223582 | 0.305587 |
| 16462 | LDLR      | 421.9910021 | 0.156933133 | 0.268964 | 0.583473 | 0.559575 | 0.666276 |

|       |           |             |             |          |          |          |          |
|-------|-----------|-------------|-------------|----------|----------|----------|----------|
| 13924 | MTMR2     | 1316.584133 | 0.156854089 | 0.116824 | 1.342658 | 0.179383 | 0.252524 |
| 16546 | PNMA2     | 1678.16065  | 0.156543443 | 0.279928 | 0.559227 | 0.576007 | 0.68234  |
| 11798 | LARP4B    | 1181.151475 | 0.155993387 | 0.077153 | 2.021875 | 0.043189 | 0.071754 |
| 15711 | FOXP1     | 969.5319307 | 0.155761033 | 0.194477 | 0.800921 | 0.423177 | 0.527955 |
| 11832 | HIF1AN    | 1117.078144 | 0.155420915 | 0.077281 | 2.011104 | 0.044314 | 0.073412 |
| 14576 | GCA       | 505.2606716 | 0.155410476 | 0.135958 | 1.143081 | 0.253005 | 0.340227 |
| 13545 | FAM21B    | 615.6603977 | 0.155333471 | 0.10549  | 1.472499 | 0.140886 | 0.203877 |
| 16939 | HOMER2    | 85.36587154 | 0.155292138 | 0.342875 | 0.452912 | 0.650612 | 0.752857 |
| 15567 | NUDT16P1  | 176.9678835 | 0.154882603 | 0.18369  | 0.843173 | 0.399132 | 0.502562 |
| 11618 | ZNF398    | 353.2174259 | 0.154747817 | 0.074614 | 2.073975 | 0.038082 | 0.064248 |
| 15476 | HOXC4     | 136.9919442 | 0.154617885 | 0.178261 | 0.86737  | 0.385739 | 0.488555 |
| 14972 | MICA      | 415.1132142 | 0.154587244 | 0.152243 | 1.015397 | 0.309917 | 0.405736 |
| 13544 | SLC30A5   | 1192.833832 | 0.154484135 | 0.104899 | 1.472693 | 0.140834 | 0.203816 |
| 15645 | MNS1      | 147.0736506 | 0.154269314 | 0.18728  | 0.823735 | 0.41009  | 0.513753 |
| 12498 | MOCS3     | 202.4866415 | 0.154193217 | 0.085421 | 1.805103 | 0.071059 | 0.111443 |
| 16167 | DC1001343 | 5.03977695  | 0.154120386 | 0.232546 | 0.662752 | 0.50749  | 0.615283 |
| 13563 | VGLL4     | 1606.843004 | 0.154109608 | 0.105088 | 1.466479 | 0.142518 | 0.20597  |
| 14643 | ZNF761    | 318.6678415 | 0.153890063 | 0.13747  | 1.119447 | 0.262949 | 0.351982 |
| 12124 | SFRS15    | 708.3447322 | 0.153870229 | 0.080154 | 1.919692 | 0.054897 | 0.088752 |
| 17350 | CDHR2     | 451.6472023 | 0.153869391 | 0.43605  | 0.352871 | 0.724185 | 0.818142 |
| 15336 | HSPA12A   | 1097.179227 | 0.152942138 | 0.168101 | 0.90982  | 0.362917 | 0.463846 |
| 12018 | UMPS      | 539.9237636 | 0.152940141 | 0.078176 | 1.956354 | 0.050423 | 0.082239 |
| 15080 | FMNL2     | 1886.592252 | 0.152933196 | 0.155511 | 0.983423 | 0.325399 | 0.422961 |
| 12123 | RBM4      | 1756.29329  | 0.15280192  | 0.079514 | 1.921691 | 0.054645 | 0.088352 |
| 13419 | TOP1P1    | 104.478197  | 0.152375015 | 0.100996 | 1.508718 | 0.131371 | 0.191892 |
| 13951 | FLJ10038  | 266.9457358 | 0.152268505 | 0.114149 | 1.333939 | 0.182224 | 0.256022 |
| 14594 | TUSC2     | 485.6256756 | 0.152230657 | 0.133739 | 1.13827  | 0.255008 | 0.342497 |
| 15617 | NDUFV1    | 2738.111403 | 0.152013554 | 0.182864 | 0.831293 | 0.405808 | 0.509332 |
| 14773 | IARS      | 2512.432143 | 0.151990594 | 0.141193 | 1.076476 | 0.281714 | 0.373782 |
| 13326 | KIN       | 199.3955635 | 0.151893778 | 0.098981 | 1.534583 | 0.124886 | 0.183693 |
| 14846 | TMEM201   | 309.1166181 | 0.15178879  | 0.14418  | 1.052773 | 0.292445 | 0.386112 |
| 12476 | PSMD10    | 939.2756474 | 0.151773809 | 0.083849 | 1.81008  | 0.070283 | 0.110426 |
| 14091 | THOC1     | 353.2803587 | 0.151472267 | 0.117353 | 1.290742 | 0.196793 | 0.273745 |
| 15029 | TLE4      | 237.3092503 | 0.15117903  | 0.151659 | 0.996836 | 0.318844 | 0.41584  |
| 15457 | C20orf94  | 24.75394045 | 0.151101603 | 0.172988 | 0.873482 | 0.382401 | 0.484922 |
| 16801 | PSD3      | 371.5518642 | 0.151090158 | 0.308884 | 0.489148 | 0.624737 | 0.728853 |
| 14525 | GNA13     | 2804.539087 | 0.151007018 | 0.130243 | 1.159422 | 0.246284 | 0.332352 |
| 15752 | ARVCF     | 260.9688612 | 0.150921103 | 0.191191 | 0.789375 | 0.429893 | 0.534937 |
| 15614 | STAG3L3   | 184.6445722 | 0.150786966 | 0.181194 | 0.832186 | 0.405304 | 0.508797 |
| 13533 | PAK1IP1   | 263.3441456 | 0.150709847 | 0.102126 | 1.475723 | 0.140018 | 0.2028   |
| 14829 | CASK      | 1032.186975 | 0.150540601 | 0.142397 | 1.057189 | 0.290425 | 0.383852 |
| 16063 | COLGA6L1  | 124.5320225 | 0.150524156 | 0.217092 | 0.693367 | 0.488079 | 0.595492 |
| 12147 | UBE3B     | 1309.395735 | 0.150441606 | 0.07864  | 1.91304  | 0.055743 | 0.08995  |
| 13388 | ZBTB49    | 78.00935008 | 0.150393483 | 0.099292 | 1.514653 | 0.12986  | 0.190125 |
| 13980 | F11R      | 2814.81165  | 0.150331388 | 0.113536 | 1.324083 | 0.185476 | 0.260051 |
| 14518 | EXTL3     | 1066.135143 | 0.150219191 | 0.129364 | 1.161212 | 0.245556 | 0.331529 |
| 14044 | C12orf5   | 393.315146  | 0.150114126 | 0.115236 | 1.302672 | 0.192687 | 0.268911 |

|       |           |             |             |          |          |          |          |
|-------|-----------|-------------|-------------|----------|----------|----------|----------|
| 17893 | DC1001303 | 0.541839525 | 0.150111113 | 0.654753 | 0.229264 | 0.818664 | 0.896833 |
| 14796 | EFR3A     | 2450.890912 | 0.150080459 | 0.140605 | 1.067392 | 0.285795 | 0.378607 |
| 15537 | IL15      | 173.8296612 | 0.150041908 | 0.176642 | 0.849413 | 0.395651 | 0.499142 |
| 14537 | C17orf100 | 59.22704753 | 0.150009558 | 0.129954 | 1.154332 | 0.248364 | 0.334882 |
| 17380 | FAM138F   | 2.096984571 | 0.149915248 | 0.43356  | 0.345777 | 0.72951  | 0.822687 |
| 12562 | PSME3     | 1787.711527 | 0.149822176 | 0.083978 | 1.784069 | 0.074412 | 0.116116 |
| 15701 | HSPB8     | 5808.684841 | 0.149813687 | 0.185892 | 0.805918 | 0.42029  | 0.524687 |
| 11956 | C6orf89   | 2487.761282 | 0.149745694 | 0.075906 | 1.972765 | 0.048522 | 0.079542 |
| 12990 | GZF1      | 451.6374464 | 0.149694095 | 0.090863 | 1.647477 | 0.09946  | 0.150078 |
| 16458 | TAS2R31   | 2.864131163 | 0.149692597 | 0.25579  | 0.585216 | 0.558402 | 0.665041 |
| 13456 | HEXIM1    | 1071.170841 | 0.149593269 | 0.09972  | 1.500131 | 0.133581 | 0.194585 |
| 13913 | RQCD1     | 149.7393937 | 0.149554336 | 0.111044 | 1.346802 | 0.178044 | 0.250833 |
| 14249 | KIAA0922  | 414.5142631 | 0.149496421 | 0.120343 | 1.242258 | 0.214141 | 0.294574 |
| 12993 | POLDIP3   | 1756.694202 | 0.149180107 | 0.090613 | 1.646347 | 0.099692 | 0.150383 |
| 13205 | BBS4      | 453.2001616 | 0.149136688 | 0.094503 | 1.578116 | 0.114539 | 0.170017 |
| 15985 | GPR4      | 1005.625992 | 0.149063073 | 0.208068 | 0.716416 | 0.473734 | 0.580899 |
| 18494 | CDH7      | 0.652832599 | 0.148802835 | 1.318891 | 0.112824 | 0.91017  | 0.96465  |
| 14363 | LIPT1     | 139.3384666 | 0.148795345 | 0.12306  | 1.20913  | 0.226613 | 0.309256 |
| 14188 | DNAJC10   | 2452.365583 | 0.148732896 | 0.117938 | 1.261107 | 0.20727  | 0.286348 |
| 12753 | NUBP1     | 561.5831677 | 0.14863422  | 0.086565 | 1.717019 | 0.085976 | 0.132142 |
| 15780 | COQ2      | 198.3823841 | 0.148627733 | 0.190257 | 0.781193 | 0.434689 | 0.539945 |
| 12816 | ZSCAN22   | 87.89303173 | 0.14862471  | 0.087399 | 1.700531 | 0.089031 | 0.136166 |
| 13770 | RING1     | 716.6020599 | 0.148530955 | 0.106418 | 1.395732 | 0.162795 | 0.231732 |
| 13928 | GTF2F2    | 353.3866926 | 0.1484636   | 0.110666 | 1.341542 | 0.179744 | 0.252956 |
| 12435 | SENP5     | 707.1599422 | 0.148358241 | 0.081258 | 1.825776 | 0.067884 | 0.107004 |
| 16887 | FOXD4L2   | 3.100609964 | 0.148324612 | 0.317041 | 0.46784  | 0.639899 | 0.74274  |
| 17059 | P2RY4     | 0.983926954 | 0.148234853 | 0.349203 | 0.424495 | 0.671205 | 0.771223 |
| 13024 | TAF9      | 1205.790664 | 0.1481473   | 0.090555 | 1.635993 | 0.101841 | 0.15327  |
| 12868 | UBA2      | 2151.649212 | 0.148081504 | 0.087748 | 1.687576 | 0.091493 | 0.139365 |
| 12248 | LSG1      | 823.3167606 | 0.148077111 | 0.07867  | 1.882268 | 0.0598   | 0.0957   |
| 14417 | PHB       | 2950.846906 | 0.148074879 | 0.124097 | 1.193223 | 0.232782 | 0.316488 |
| 10909 | TLK2      | 527.6451487 | 0.14805406  | 0.063868 | 2.318117 | 0.020443 | 0.036731 |
| 15736 | FAR2      | 131.5423955 | 0.147963086 | 0.18648  | 0.793452 | 0.427515 | 0.532513 |
| 17047 | DUOX2     | 5.220414987 | 0.147942587 | 0.345454 | 0.428255 | 0.668465 | 0.76864  |
| 13346 | ZNF599    | 96.63957599 | 0.147764945 | 0.09662  | 1.529337 | 0.126181 | 0.185319 |
| 15345 | NBN       | 2129.392084 | 0.147623425 | 0.162914 | 0.906142 | 0.364861 | 0.46607  |
| 13678 | MAP2K1    | 1622.097088 | 0.147529219 | 0.103306 | 1.428074 | 0.153271 | 0.219642 |
| 11394 | C12orf43  | 278.473953  | 0.147523594 | 0.068532 | 2.15263  | 0.031348 | 0.053927 |
| 13576 | TTC3      | 3625.005817 | 0.147520072 | 0.100866 | 1.462535 | 0.143595 | 0.207322 |
| 14914 | LOC202781 | 205.5866674 | 0.147400577 | 0.142852 | 1.031844 | 0.302145 | 0.397073 |
| 15377 | SUMF1     | 1128.603801 | 0.147390396 | 0.164545 | 0.895746 | 0.370388 | 0.472133 |
| 16285 | C15orf51  | 14.36178496 | 0.147283808 | 0.233047 | 0.631992 | 0.527392 | 0.634781 |
| 12889 | RXRB      | 863.0093539 | 0.147224716 | 0.087825 | 1.676346 | 0.09367  | 0.14245  |
| 15475 | ATL1      | 219.0796217 | 0.147140229 | 0.169548 | 0.86784  | 0.385482 | 0.488261 |
| 12827 | METAP2    | 1544.502642 | 0.147095559 | 0.086698 | 1.696635 | 0.089766 | 0.137171 |
| 11600 | PPP1R8    | 770.9915739 | 0.146967228 | 0.070644 | 2.080389 | 0.03749  | 0.06335  |
| 16309 | APOBEC2   | 2.771918695 | 0.146593634 | 0.234348 | 0.625537 | 0.531619 | 0.638927 |

|       |           |             |             |          |          |          |          |
|-------|-----------|-------------|-------------|----------|----------|----------|----------|
| 13762 | SETD6     | 272.526911  | 0.14635424  | 0.10462  | 1.398909 | 0.16184  | 0.230507 |
| 12129 | VPS52     | 1106.12541  | 0.146269292 | 0.07626  | 1.918024 | 0.055108 | 0.089057 |
| 12041 | RIPK1     | 1113.583472 | 0.146160906 | 0.075051 | 1.947481 | 0.051477 | 0.083797 |
| 12698 | MARK2     | 891.1767837 | 0.146155575 | 0.084242 | 1.734959 | 0.082748 | 0.127732 |
| 12108 | MBTPS1    | 2750.802278 | 0.146067502 | 0.075833 | 1.926177 | 0.054082 | 0.087551 |
| 16214 | GJA1      | 3588.693252 | 0.145695872 | 0.223808 | 0.650987 | 0.515055 | 0.622647 |
| 14504 | SFRS11    | 2421.923079 | 0.145064244 | 0.124513 | 1.165055 | 0.243997 | 0.329742 |
| 14175 | RPUSD2    | 150.2866275 | 0.144912454 | 0.114632 | 1.264157 | 0.206174 | 0.285098 |
| 13238 | YRDC      | 308.3657576 | 0.144891437 | 0.09243  | 1.567572 | 0.116981 | 0.173209 |
| 14384 | LOC285033 | 34.64011018 | 0.144819278 | 0.120424 | 1.202573 | 0.229141 | 0.31225  |
| 15941 | LDLRAD3   | 372.3472216 | 0.144813162 | 0.198889 | 0.728111 | 0.466546 | 0.573663 |
| 16823 | GSTM2P1   | 1.467216418 | 0.144653096 | 0.298321 | 0.48489  | 0.627754 | 0.731416 |
| 13439 | TSR1      | 1182.031363 | 0.144638711 | 0.096215 | 1.503284 | 0.132766 | 0.193641 |
| 15008 | IFT122    | 910.9273839 | 0.144449706 | 0.143571 | 1.006118 | 0.314359 | 0.410564 |
| 14128 | SAMD4B    | 1543.308887 | 0.144434885 | 0.112883 | 1.279511 | 0.200717 | 0.278472 |
| 14459 | CAST      | 6648.918264 | 0.144425691 | 0.122444 | 1.179521 | 0.238191 | 0.322876 |
| 13787 | HIATL1    | 1186.641074 | 0.144288108 | 0.103778 | 1.390355 | 0.164421 | 0.233758 |
| 14522 | NCAPD3    | 332.6789466 | 0.144192132 | 0.124287 | 1.160154 | 0.245986 | 0.332019 |
| 13472 | INRNPA3P  | 68.15263999 | 0.144016824 | 0.096255 | 1.496198 | 0.134602 | 0.195839 |
| 14018 | ZMIZ1     | 2852.189615 | 0.144013532 | 0.109629 | 1.313639 | 0.188968 | 0.264229 |
| 14560 | STARD3NI  | 1299.586947 | 0.143943144 | 0.125359 | 1.148248 | 0.250866 | 0.337742 |
| 15222 | QKI       | 3401.565059 | 0.143802203 | 0.152768 | 0.941311 | 0.346546 | 0.446239 |
| 16403 | GRRP1     | 73.71598109 | 0.1434057   | 0.238814 | 0.600492 | 0.548178 | 0.655054 |
| 14613 | COX7A2L   | 2199.80905  | 0.143383051 | 0.127075 | 1.128335 | 0.259179 | 0.347647 |
| 17442 | KRT23     | 3.692963941 | 0.143375726 | 0.436429 | 0.32852  | 0.742518 | 0.834381 |
| 13984 | ZNHIT6    | 377.684288  | 0.143311218 | 0.108258 | 1.323791 | 0.185572 | 0.260112 |
| 14497 | OFD1      | 805.1403253 | 0.142831239 | 0.12221  | 1.16874  | 0.242508 | 0.327889 |
| 17210 | AZGP1     | 790.128711  | 0.142778083 | 0.370346 | 0.385526 | 0.699848 | 0.797078 |
| 14348 | N6AMT1    | 243.4002593 | 0.142422446 | 0.117362 | 1.213531 | 0.224927 | 0.307276 |
| 13608 | MON1B     | 682.2760264 | 0.142356926 | 0.097952 | 1.453337 | 0.14613  | 0.210486 |
| 14782 | ACAA1     | 1197.9783   | 0.142305093 | 0.132544 | 1.073643 | 0.282983 | 0.375236 |
| 15057 | MORN4     | 187.9326817 | 0.142178002 | 0.14391  | 0.987962 | 0.323171 | 0.4207   |
| 15087 | BTAF1     | 957.9721428 | 0.142129438 | 0.145005 | 0.980169 | 0.327003 | 0.424841 |
| 15344 | ACYP1     | 79.77639553 | 0.142096769 | 0.156819 | 0.906121 | 0.364872 | 0.46607  |
| 14687 | RAP1B     | 3112.324413 | 0.142015096 | 0.128573 | 1.10455  | 0.269354 | 0.359476 |
| 13977 | WDTC1     | 1496.505043 | 0.141902716 | 0.107109 | 1.324848 | 0.185222 | 0.25975  |
| 13143 | HNRNPH1   | 4094.747589 | 0.141753219 | 0.088805 | 1.596227 | 0.110438 | 0.164703 |
| 17048 | CCDC8     | 319.6816026 | 0.141734568 | 0.331573 | 0.427462 | 0.669043 | 0.769235 |
| 13944 | MAVS      | 2494.096964 | 0.141719635 | 0.106069 | 1.33611  | 0.181513 | 0.255152 |
| 12781 | TAF4      | 375.3056468 | 0.141701267 | 0.082812 | 1.711118 | 0.087059 | 0.133514 |
| 17193 | PCDHA13   | 10.91940916 | 0.141655503 | 0.364385 | 0.388752 | 0.69746  | 0.79512  |
| 13939 | SMYD4     | 390.1660081 | 0.141606174 | 0.105781 | 1.338673 | 0.180677 | 0.25405  |
| 17867 | RFPL4B    | 1.659697263 | 0.141473173 | 0.603506 | 0.234419 | 0.81466  | 0.893794 |
| 13001 | PCID2     | 548.6837418 | 0.141265841 | 0.085902 | 1.644501 | 0.100073 | 0.150875 |
| 14492 | MPHOSPHO  | 237.3218262 | 0.141017152 | 0.120402 | 1.17122  | 0.24151  | 0.326656 |
| 16909 | CLDN3     | 345.2209017 | 0.140817957 | 0.304076 | 0.463101 | 0.643292 | 0.745707 |
| 14775 | CMTM6     | 2058.840332 | 0.140806124 | 0.13092  | 1.075513 | 0.282145 | 0.374303 |

|       |           |             |             |          |          |          |          |
|-------|-----------|-------------|-------------|----------|----------|----------|----------|
| 15516 | RPL32P3   | 137.0114615 | 0.140714955 | 0.164776 | 0.853975 | 0.393119 | 0.496618 |
| 14339 | HLCS      | 567.4061325 | 0.140538781 | 0.115456 | 1.217253 | 0.223508 | 0.305529 |
| 14386 | SH3GLB1   | 3427.47953  | 0.140490239 | 0.116875 | 1.202054 | 0.229343 | 0.312481 |
| 15401 | TIGD1     | 131.9386263 | 0.140469401 | 0.15778  | 0.890286 | 0.373312 | 0.475118 |
| 13406 | MAPKAP1   | 1325.222758 | 0.140432218 | 0.092961 | 1.510654 | 0.130877 | 0.191356 |
| 14622 | PARP4     | 2384.558534 | 0.140087261 | 0.124392 | 1.126173 | 0.260092 | 0.348657 |
| 16203 | TMEM217   | 38.53544288 | 0.140047294 | 0.214188 | 0.653853 | 0.513207 | 0.62085  |
| 13452 | TRIM35    | 503.6913343 | 0.1399336   | 0.093198 | 1.501471 | 0.133234 | 0.194136 |
| 14640 | ATP6AP1   | 4514.011137 | 0.139521354 | 0.124565 | 1.120065 | 0.262686 | 0.351701 |
| 14432 | LAMP1     | 6462.996623 | 0.139482324 | 0.117377 | 1.188325 | 0.234705 | 0.318763 |
| 14225 | RARS2     | 629.6815447 | 0.139330508 | 0.111387 | 1.250863 | 0.210984 | 0.290721 |
| 16202 | TMEM151F  | 12.49415266 | 0.139216625 | 0.212924 | 0.653832 | 0.51322  | 0.62085  |
| 16419 | PABPC5    | 27.59107851 | 0.13913901  | 0.232511 | 0.59842  | 0.54956  | 0.656064 |
| 15925 | FAM35B2   | 94.17886129 | 0.139064883 | 0.189209 | 0.734981 | 0.462351 | 0.569077 |
| 16487 | PCDHB4    | 150.4858181 | 0.139030445 | 0.241417 | 0.575894 | 0.564687 | 0.671349 |
| 16221 | CG030     | 60.52310004 | 0.139013382 | 0.2142   | 0.648987 | 0.516346 | 0.623918 |
| 17472 | FLJ30679  | 0.968766794 | 0.138929978 | 0.432893 | 0.320934 | 0.74826  | 0.839438 |
| 13881 | ZNF70     | 164.7622718 | 0.138904825 | 0.10256  | 1.354382 | 0.175615 | 0.247981 |
| 15849 | HOXA5     | 138.9655304 | 0.138762292 | 0.182877 | 0.758773 | 0.447988 | 0.554042 |
| 16188 | US1-DBND1 | 32.66656663 | 0.138752776 | 0.211409 | 0.656323 | 0.511616 | 0.619483 |
| 12030 | FRG1      | 548.3197634 | 0.138665949 | 0.071033 | 1.952128 | 0.050923 | 0.082971 |
| 13774 | PPP5C     | 1042.312867 | 0.138382264 | 0.099199 | 1.394996 | 0.163017 | 0.23198  |
| 15410 | DOT1L     | 515.0008523 | 0.138057059 | 0.155713 | 0.886614 | 0.375287 | 0.477352 |
| 14069 | ZNF609    | 948.2072493 | 0.138011719 | 0.106417 | 1.296897 | 0.194667 | 0.27121  |
| 17802 | HIST1H4B  | 0.608073135 | 0.137818444 | 0.560196 | 0.246018 | 0.805668 | 0.887086 |
| 14624 | PPP3R1    | 1486.273341 | 0.137678947 | 0.122343 | 1.125349 | 0.260441 | 0.349077 |
| 15111 | JAZF1     | 652.4123777 | 0.137669864 | 0.141523 | 0.972773 | 0.330666 | 0.428918 |
| 12740 | MED6      | 274.6777732 | 0.137668769 | 0.080015 | 1.720535 | 0.085335 | 0.131292 |
| 14728 | WNK1      | 3970.318963 | 0.137600219 | 0.126229 | 1.090087 | 0.275675 | 0.366886 |
| 15995 | NEK11     | 230.0176163 | 0.137489182 | 0.192475 | 0.714324 | 0.475027 | 0.58212  |
| 13613 | FAM48A    | 732.8175472 | 0.13741571  | 0.094643 | 1.451937 | 0.146519 | 0.210969 |
| 15582 | TPD52     | 1614.420772 | 0.137395771 | 0.163546 | 0.840104 | 0.40085  | 0.50424  |
| 16131 | FAM167B   | 360.2006995 | 0.137309844 | 0.204192 | 0.672455 | 0.501294 | 0.60913  |
| 15999 | CCT6B     | 51.12345326 | 0.137282041 | 0.192392 | 0.713553 | 0.475503 | 0.582558 |
| 15958 | PGM2L1    | 597.4923461 | 0.137161168 | 0.189165 | 0.725088 | 0.468398 | 0.575327 |
| 16810 | PGBD5     | 501.6000501 | 0.137130895 | 0.281133 | 0.487779 | 0.625707 | 0.729594 |
| 12344 | DDX19A    | 841.2999371 | 0.13706522  | 0.074081 | 1.850199 | 0.064285 | 0.102069 |
| 17870 | SH2D6     | 1.436483789 | 0.137054499 | 0.586856 | 0.23354  | 0.815342 | 0.894321 |
| 16005 | TMEM141   | 1320.224103 | 0.136991791 | 0.19262  | 0.711201 | 0.47696  | 0.584123 |
| 13679 | C3orf19   | 354.6040189 | 0.136912424 | 0.0959   | 1.427658 | 0.15339  | 0.219791 |
| 14986 | SERTAD2   | 1327.503941 | 0.136908063 | 0.135519 | 1.010248 | 0.312377 | 0.408574 |
| 17414 | C12orf42  | 1.255295267 | 0.136893329 | 0.404791 | 0.338182 | 0.735226 | 0.827562 |
| 15079 | ELOVL5    | 2236.970924 | 0.136624858 | 0.138934 | 0.983381 | 0.32542  | 0.422961 |
| 13053 | ZNF766    | 360.4878474 | 0.13660291  | 0.083861 | 1.628929 | 0.103328 | 0.155162 |
| 16947 | P2RY12    | 44.29304633 | 0.136522085 | 0.302929 | 0.450674 | 0.652225 | 0.754362 |
| 12257 | VPS8      | 759.0105732 | 0.136421345 | 0.072531 | 1.880864 | 0.05999  | 0.095938 |
| 16506 | C9orf96   | 7.151514404 | 0.136259052 | 0.238815 | 0.570562 | 0.568296 | 0.674856 |

|       |           |             |             |          |          |          |          |
|-------|-----------|-------------|-------------|----------|----------|----------|----------|
| 18126 | GABRA4    | 1.034852893 | 0.136018756 | 0.761203 | 0.178689 | 0.858182 | 0.928058 |
| 14872 | ANAPC1    | 552.602907  | 0.135825323 | 0.129974 | 1.045016 | 0.296015 | 0.390143 |
| 14062 | LOC728190 | 153.6064288 | 0.135623224 | 0.104446 | 1.298498 | 0.194116 | 0.270578 |
| 14994 | CUL9      | 590.5363085 | 0.135599622 | 0.134486 | 1.008282 | 0.313319 | 0.409588 |
| 17495 | AKR1C4    | 3.435530102 | 0.135537007 | 0.429396 | 0.315646 | 0.752272 | 0.842828 |
| 15792 | PRPS2     | 950.8864771 | 0.135201451 | 0.17362  | 0.778722 | 0.436143 | 0.54134  |
| 17362 | PXDNL     | 136.6719972 | 0.135135927 | 0.385943 | 0.350145 | 0.72623  | 0.819885 |
| 16086 | INSIG1    | 927.9027267 | 0.135074963 | 0.196989 | 0.685698 | 0.492903 | 0.600609 |
| 13407 | C14orf119 | 831.1356556 | 0.135067326 | 0.089419 | 1.510491 | 0.130918 | 0.191402 |
| 13665 | ZBTB22    | 478.9291437 | 0.135060963 | 0.09421  | 1.433615 | 0.151682 | 0.217572 |
| 12757 | CDC16     | 1420.66805  | 0.134963181 | 0.078648 | 1.716033 | 0.086156 | 0.132365 |
| 11777 | TERF2     | 603.9584392 | 0.134915625 | 0.066499 | 2.028839 | 0.042475 | 0.070693 |
| 13849 | UQCC      | 994.1969268 | 0.134891818 | 0.09856  | 1.36862  | 0.171118 | 0.24219  |
| 15276 | NPHP1     | 171.8603074 | 0.134711482 | 0.14541  | 0.926426 | 0.354225 | 0.454514 |
| 14906 | AZIN1     | 2733.03532  | 0.13462494  | 0.130177 | 1.034165 | 0.301059 | 0.395885 |
| 15631 | EXOC3     | 1840.06557  | 0.134622328 | 0.162855 | 0.826641 | 0.408441 | 0.512177 |
| 13816 | ZSCAN5A   | 74.49801622 | 0.134610297 | 0.097465 | 1.381115 | 0.167244 | 0.237272 |
| 14131 | FAM103A1  | 283.6635839 | 0.134204057 | 0.104922 | 1.279083 | 0.200868 | 0.278621 |
| 14173 | PMS2      | 797.2568401 | 0.134108145 | 0.106078 | 1.264237 | 0.206145 | 0.285095 |
| 15828 | GNG11     | 3036.920591 | 0.133699479 | 0.174389 | 0.766673 | 0.443276 | 0.548926 |
| 15774 | STAMBPL1  | 302.9658091 | 0.133629053 | 0.170617 | 0.783209 | 0.433504 | 0.538678 |
| 16173 | HCG4      | 131.8576183 | 0.133428461 | 0.201769 | 0.661294 | 0.508424 | 0.616188 |
| 16593 | LIMS1     | 729.2331376 | 0.133427534 | 0.2428   | 0.549537 | 0.582637 | 0.688258 |
| 13947 | ZNF500    | 188.9094178 | 0.132921781 | 0.099566 | 1.335015 | 0.181871 | 0.255601 |
| 15865 | HELB      | 31.06156659 | 0.132824883 | 0.176169 | 0.753963 | 0.450871 | 0.557046 |
| 14760 | ATG2A     | 651.6997369 | 0.132583115 | 0.122573 | 1.081666 | 0.279401 | 0.371039 |
| 14413 | HERC4     | 793.2980424 | 0.132535423 | 0.11098  | 1.194226 | 0.23239  | 0.316039 |
| 14789 | MRPS5     | 1056.813253 | 0.132360082 | 0.123582 | 1.071032 | 0.284155 | 0.376613 |
| 15225 | AGFG1     | 2036.60283  | 0.13221985  | 0.140614 | 0.940301 | 0.347063 | 0.446816 |
| 13336 | ARNT      | 1273.569497 | 0.132117984 | 0.086236 | 1.532059 | 0.125508 | 0.184469 |
| 15753 | OSGIN2    | 1043.036466 | 0.132092155 | 0.167484 | 0.788686 | 0.430295 | 0.535404 |
| 13690 | NSUN4     | 542.2857339 | 0.131933422 | 0.09275  | 1.422466 | 0.154891 | 0.221769 |
| 13871 | MED18     | 228.0495327 | 0.1318625   | 0.096865 | 1.361295 | 0.17342  | 0.245059 |
| 16218 | NR1I3     | 9.873226081 | 0.131798226 | 0.202853 | 0.649724 | 0.51587  | 0.623478 |
| 15088 | SLC25A38  | 508.3608434 | 0.131775367 | 0.134526 | 0.979551 | 0.327308 | 0.42521  |
| 18213 | ADH4      | 4.054104017 | 0.131631621 | 0.826513 | 0.159261 | 0.873463 | 0.940029 |
| 15193 | ACP6      | 224.5015066 | 0.131583974 | 0.138479 | 0.950209 | 0.342006 | 0.441234 |
| 17314 | SBF1P1    | 0.910512621 | 0.131542363 | 0.361522 | 0.363857 | 0.715965 | 0.810536 |
| 17607 | DC1001446 | 1.974652333 | 0.13144931  | 0.449614 | 0.29236  | 0.770011 | 0.857215 |
| 14585 | CXorf38   | 290.3392523 | 0.131298727 | 0.115035 | 1.141376 | 0.253714 | 0.340969 |
| 14237 | FANCF     | 422.2356025 | 0.131214039 | 0.105333 | 1.245709 | 0.212871 | 0.293074 |
| 14639 | SLC12A4   | 1706.347215 | 0.131125898 | 0.116941 | 1.121295 | 0.262162 | 0.351043 |
| 15347 | CBR1      | 1919.011891 | 0.130947095 | 0.144581 | 0.905701 | 0.365094 | 0.466263 |
| 14088 | PIP5K1A   | 1074.782496 | 0.1308425   | 0.101286 | 1.291808 | 0.196424 | 0.273289 |
| 14826 | SERP1     | 3696.856554 | 0.130609226 | 0.123508 | 1.057492 | 0.290287 | 0.383754 |
| 15237 | LOC283267 | 450.8925796 | 0.130484723 | 0.13922  | 0.937254 | 0.348628 | 0.448478 |
| 11001 | KIAA0174  | 2955.127679 | 0.130448044 | 0.056996 | 2.288725 | 0.022095 | 0.039368 |



|       |           |             |             |          |          |          |          |
|-------|-----------|-------------|-------------|----------|----------|----------|----------|
| 16097 | PTPRN2    | 297.330411  | 0.130326227 | 0.191034 | 0.682213 | 0.495104 | 0.602878 |
| 15643 | TCEAL3    | 384.6404621 | 0.130200035 | 0.157985 | 0.82413  | 0.409866 | 0.513579 |
| 14219 | ANAPC4    | 461.8210953 | 0.129838228 | 0.10375  | 1.251452 | 0.21077  | 0.290527 |
| 15841 | ASB13     | 1300.80533  | 0.129822345 | 0.170632 | 0.760832 | 0.446757 | 0.552729 |
| 14745 | C1orf212  | 765.5282355 | 0.12966125  | 0.119543 | 1.084644 | 0.27808  | 0.36966  |
| 15759 | FUZ       | 415.197392  | 0.129639164 | 0.16473  | 0.786978 | 0.431295 | 0.536432 |
| 13496 | ZCCHC8    | 627.7005431 | 0.129517404 | 0.086954 | 1.489488 | 0.136359 | 0.19805  |
| 14286 | KDM5A     | 1336.969093 | 0.129255333 | 0.104775 | 1.233643 | 0.217336 | 0.298194 |
| 12672 | TERF2IP   | 1570.651856 | 0.129142762 | 0.073946 | 1.746458 | 0.080731 | 0.124875 |
| 14261 | BAT2      | 4051.129104 | 0.129067343 | 0.104081 | 1.240069 | 0.21495  | 0.295437 |
| 15671 | KIAA0907  | 811.0989031 | 0.128971718 | 0.158087 | 0.815829 | 0.414598 | 0.518582 |
| 15951 | TUBGCP6   | 951.3445467 | 0.128933556 | 0.177465 | 0.726531 | 0.467513 | 0.574494 |
| 16798 | PPP2R2B   | 47.81844637 | 0.128925548 | 0.262782 | 0.490618 | 0.623697 | 0.72777  |
| 15115 | OGT       | 3120.261624 | 0.12889343  | 0.132708 | 0.971255 | 0.331421 | 0.429784 |
| 15842 | GPR135    | 20.49081795 | 0.128629673 | 0.169055 | 0.760875 | 0.446732 | 0.552729 |
| 14682 | ABCF1     | 1291.246396 | 0.128460503 | 0.115994 | 1.107474 | 0.268089 | 0.357884 |
| 17107 | MYO1H     | 4.507692746 | 0.128408604 | 0.312648 | 0.410714 | 0.681283 | 0.780606 |
| 15287 | HSPD1     | 9396.032892 | 0.128358408 | 0.138927 | 0.92393  | 0.355523 | 0.455851 |
| 14881 | ZNF528    | 327.588175  | 0.12829226  | 0.123    | 1.043024 | 0.296937 | 0.391121 |
| 14388 | XPO1      | 3127.901191 | 0.128278037 | 0.106752 | 1.201648 | 0.2295   | 0.312651 |
| 15484 | NGFRAP1   | 1957.895091 | 0.128251251 | 0.148109 | 0.865927 | 0.38653  | 0.489303 |
| 17339 | AMY2A     | 2.041338924 | 0.128242303 | 0.358142 | 0.358077 | 0.720286 | 0.814205 |
| 14951 | C22orf23  | 39.20754178 | 0.128194374 | 0.125398 | 1.022299 | 0.306639 | 0.401984 |
| 16364 | GPR176    | 226.975094  | 0.128134861 | 0.210268 | 0.609389 | 0.542267 | 0.649534 |
| 15460 | KANK1     | 1904.356455 | 0.128045155 | 0.146722 | 0.872707 | 0.382823 | 0.485331 |
| 16976 | GTF2H2B   | 92.23973786 | 0.128013771 | 0.28817  | 0.44423  | 0.656877 | 0.758271 |
| 14883 | ZNF30     | 61.45171595 | 0.127935236 | 0.122705 | 1.042623 | 0.297123 | 0.391312 |
| 12795 | NUP88     | 590.2755612 | 0.127799539 | 0.074909 | 1.706065 | 0.087996 | 0.134803 |
| 15295 | LIN9      | 86.80024978 | 0.127581399 | 0.138316 | 0.92239  | 0.356325 | 0.456642 |
| 13524 | CEP63     | 517.3491689 | 0.127455967 | 0.086136 | 1.479702 | 0.138953 | 0.201391 |
| 13969 | KHDRBS1   | 3580.693332 | 0.127259475 | 0.095798 | 1.328411 | 0.184042 | 0.258244 |
| 15509 | CLEC16A   | 764.600628  | 0.127052214 | 0.148314 | 0.856643 | 0.391642 | 0.494976 |
| 12915 | ELAVL1    | 1714.845189 | 0.126514846 | 0.07581  | 1.668831 | 0.095151 | 0.14441  |
| 13089 | ZNF830    | 305.5651123 | 0.126507189 | 0.078354 | 1.614558 | 0.106406 | 0.159345 |
| 14099 | TMEM87A   | 1672.553771 | 0.1264671   | 0.098146 | 1.288557 | 0.197552 | 0.274625 |
| 17246 | DOC2B     | 18.64144495 | 0.12634001  | 0.334651 | 0.377528 | 0.705781 | 0.802158 |
| 17004 | ANKRD45   | 34.95707284 | 0.126325579 | 0.288121 | 0.438447 | 0.661062 | 0.761993 |
| 14521 | CCDC125   | 229.2086173 | 0.126260057 | 0.108824 | 1.160223 | 0.245958 | 0.332004 |
| 15514 | RAI1      | 788.8641825 | 0.126228691 | 0.147584 | 0.8553   | 0.392385 | 0.495755 |
| 15561 | RAPH1     | 1017.169173 | 0.126155635 | 0.149404 | 0.844394 | 0.398449 | 0.50187  |
| 15741 | CABC1     | 1101.073493 | 0.126126546 | 0.159274 | 0.791883 | 0.428429 | 0.533488 |
| 14726 | MRPL48    | 435.5364758 | 0.12612549  | 0.115637 | 1.090706 | 0.275402 | 0.366577 |
| 15967 | COX8A     | 2639.850048 | 0.126078746 | 0.174283 | 0.723413 | 0.469426 | 0.576265 |
| 15218 | SLC25A11  | 1350.670414 | 0.125994654 | 0.133623 | 0.942912 | 0.345726 | 0.4453   |
| 15581 | LARGE     | 259.8267786 | 0.125642085 | 0.149555 | 0.840109 | 0.400847 | 0.50424  |
| 14394 | RWDD3     | 212.4712682 | 0.125626449 | 0.104762 | 1.199156 | 0.230467 | 0.313838 |
| 14852 | DC1001306 | 20.89942782 | 0.125528066 | 0.119374 | 1.051549 | 0.293006 | 0.386697 |

|       |          |             |             |          |          |          |          |
|-------|----------|-------------|-------------|----------|----------|----------|----------|
| 15415 | NDUFAB1  | 1156.567905 | 0.125312257 | 0.141644 | 0.884697 | 0.37632  | 0.478511 |
| 16378 | CLCF1    | 263.4002247 | 0.125266211 | 0.206737 | 0.60592  | 0.544568 | 0.651693 |
| 17408 | CES3     | 989.79462   | 0.125069995 | 0.368548 | 0.339359 | 0.734339 | 0.826849 |
| 14938 | IMMP1L   | 68.60424657 | 0.125067084 | 0.122096 | 1.024331 | 0.305679 | 0.401055 |
| 14074 | C6orf62  | 3369.863289 | 0.125009095 | 0.096469 | 1.295849 | 0.195028 | 0.271617 |
| 13279 | C6orf47  | 635.5215904 | 0.124912893 | 0.080515 | 1.551433 | 0.120798 | 0.178309 |
| 13022 | PPP4R1   | 1353.410998 | 0.124837055 | 0.076274 | 1.636694 | 0.101694 | 0.153073 |
| 15273 | CFLAR    | 1786.820565 | 0.124729263 | 0.134504 | 0.92733  | 0.353755 | 0.454001 |
| 13938 | LARS     | 2825.707413 | 0.124609655 | 0.093064 | 1.338969 | 0.180581 | 0.253951 |
| 15611 | ACYP2    | 146.8870358 | 0.124522353 | 0.149622 | 0.832248 | 0.405269 | 0.508786 |
| 16555 | DLL4     | 1505.768908 | 0.124445559 | 0.223193 | 0.55757  | 0.577138 | 0.683304 |
| 17171 | FOXD4L6  | 1.317760176 | 0.124426129 | 0.316087 | 0.393645 | 0.693843 | 0.792034 |
| 17868 | OR4F29   | 0.473581224 | 0.124400068 | 0.531401 | 0.234098 | 0.814909 | 0.893946 |
| 15220 | KIAA1731 | 298.3773268 | 0.124395235 | 0.131972 | 0.942588 | 0.345892 | 0.445455 |
| 16721 | LPHN1    | 409.1857025 | 0.124317201 | 0.241775 | 0.514186 | 0.607122 | 0.711649 |
| 17239 | MSTN     | 14.31091859 | 0.124051936 | 0.327303 | 0.379013 | 0.704678 | 0.80123  |
| 15152 | INPP5E   | 275.9988508 | 0.123919675 | 0.129259 | 0.958694 | 0.337713 | 0.436816 |
| 14676 | FAM119A  | 231.2675329 | 0.123821622 | 0.111666 | 1.10886  | 0.267491 | 0.357256 |
| 16679 | FAM195A  | 703.4612321 | 0.12368146  | 0.235218 | 0.525816 | 0.599016 | 0.703958 |
| 15518 | TBC1D8   | 690.7537535 | 0.12346828  | 0.144661 | 0.853499 | 0.393383 | 0.496887 |
| 15060 | C7orf60  | 374.6640038 | 0.123430321 | 0.124996 | 0.987475 | 0.32341  | 0.420926 |
| 17100 | ID2B     | 9.835964672 | 0.123114126 | 0.29824  | 0.412802 | 0.679751 | 0.77917  |
| 15673 | SASS6    | 91.5247617  | 0.123016599 | 0.15083  | 0.815597 | 0.414731 | 0.518672 |
| 15731 | CCDC51   | 231.119768  | 0.12290359  | 0.154624 | 0.794854 | 0.426698 | 0.531604 |
| 13476 | TAF11    | 522.8586414 | 0.122879682 | 0.082163 | 1.495559 | 0.134769 | 0.196023 |
| 15960 | SLC48A1  | 777.3032584 | 0.122816591 | 0.169468 | 0.724717 | 0.468626 | 0.575568 |
| 16562 | GJA5     | 564.8645163 | 0.122687646 | 0.220622 | 0.556099 | 0.578143 | 0.684206 |
| 13959 | TRMT6    | 332.9857359 | 0.122667061 | 0.092123 | 1.331557 | 0.183006 | 0.256974 |
| 13763 | WDR73    | 344.3229484 | 0.122520852 | 0.087653 | 1.397789 | 0.162176 | 0.230968 |
| 17843 | GALR2    | 0.900195725 | 0.122499934 | 0.517658 | 0.236643 | 0.812934 | 0.892979 |
| 15873 | NUCB2    | 2018.429745 | 0.122474553 | 0.163187 | 0.750518 | 0.452943 | 0.559323 |
| 17829 | HTA      | 0.42494108  | 0.12246331  | 0.509713 | 0.240259 | 0.810129 | 0.890647 |
| 18039 | TMEM40   | 0.385112638 | 0.122463197 | 0.616179 | 0.198746 | 0.842461 | 0.91541  |
| 18059 | TAS2R1   | 0.331103161 | 0.122463149 | 0.629827 | 0.194439 | 0.845832 | 0.918089 |
| 18210 | C9orf171 | 0.243954811 | 0.122462907 | 0.767116 | 0.159641 | 0.873164 | 0.939811 |
| 18292 | USP17L2  | 0.226891279 | 0.122462762 | 0.843152 | 0.145244 | 0.884518 | 0.947815 |
| 18353 | PRO1768  | 0.243514886 | 0.122462688 | 0.89669  | 0.136572 | 0.891369 | 0.952033 |
| 18477 | OR3A1    | 0.307640697 | 0.122462462 | 1.058718 | 0.115671 | 0.907914 | 0.963144 |
| 18430 | IFNA13   | 0.166810914 | 0.122462396 | 0.98956  | 0.123754 | 0.90151  | 0.95879  |
| 18498 | NANOS2   | 0.259455924 | 0.122462327 | 1.092118 | 0.112133 | 0.910718 | 0.96504  |
| 18476 | ARR3     | 0.146355143 | 0.122462208 | 1.056942 | 0.115865 | 0.90776  | 0.963033 |
| 18513 | PRSS42   | 0.148129468 | 0.122462018 | 1.131733 | 0.108208 | 0.913831 | 0.967536 |
| 18563 | OR2T8    | 0.144806859 | 0.122461779 | 1.219202 | 0.100444 | 0.919992 | 0.971435 |
| 18564 | IFNA21   | 0.12513995  | 0.12246172  | 1.224604 | 0.100001 | 0.920343 | 0.97165  |
| 18624 | IL19     | 0.145872555 | 0.122461488 | 1.317562 | 0.092946 | 0.925947 | 0.974521 |
| 18626 | OR2A2    | 0.127763948 | 0.122461427 | 1.32107  | 0.092699 | 0.926143 | 0.974623 |
| 18627 | MGC15885 | 0.125011286 | 0.122461419 | 1.323727 | 0.092513 | 0.926291 | 0.974726 |

|       |           |             |             |          |          |          |          |
|-------|-----------|-------------|-------------|----------|----------|----------|----------|
| 18659 | LOC644669 | 0.186423947 | 0.122461267 | 1.423825 | 0.086009 | 0.93146  | 0.978432 |
| 18664 | CRNA0009  | 0.178578734 | 0.122461223 | 1.437599 | 0.085185 | 0.932115 | 0.97891  |
| 18662 | OR1F2P    | 0.126043267 | 0.122461051 | 1.435533 | 0.085307 | 0.932017 | 0.978892 |
| 18666 | IFNA5     | 0.109630018 | 0.122460957 | 1.44543  | 0.084723 | 0.932482 | 0.979191 |
| 18732 | PHOX2B    | 0.125943583 | 0.122460584 | 1.566209 | 0.078189 | 0.937678 | 0.981752 |
| 18712 | ANP32D    | 0.111820503 | 0.122460476 | 1.575942 | 0.077706 | 0.938062 | 0.981752 |
| 18789 | IFNK      | 0.11363336  | 0.122459857 | 1.729301 | 0.070815 | 0.943545 | 0.984322 |
| 18793 | SNORA6    | 0.10878502  | 0.122459822 | 1.737738 | 0.070471 | 0.943819 | 0.984446 |
| 18792 | FAM71E2   | 0.107985156 | 0.122459816 | 1.739173 | 0.070413 | 0.943865 | 0.984446 |
| 18795 | CRNA0020  | 0.105893569 | 0.122459789 | 1.745435 | 0.07016  | 0.944066 | 0.984551 |
| 18932 | SGCZ      | 0.187085672 | 0.122459672 | 1.862897 | 0.065736 | 0.947588 | 0.986718 |
| 18925 | RLN3      | 0.134619439 | 0.122459244 | 1.891484 | 0.064742 | 0.948379 | 0.986718 |
| 18877 | DC1001288 | 0.10532225  | 0.122458938 | 1.93499  | 0.063287 | 0.949538 | 0.986718 |
| 18867 | IQCF6     | 0.090642376 | 0.122458713 | 1.959011 | 0.06251  | 0.950156 | 0.986718 |
| 18897 | OR10W1    | 0.085783298 | 0.122458647 | 1.972388 | 0.062086 | 0.950494 | 0.986718 |
| 18979 | TAAR9     | 0.070874578 | 0.12245697  | 2.261613 | 0.054146 | 0.956819 | 0.988177 |
| 19004 | BPIL1     | 0.23848217  | 0.122456607 | 2.56681  | 0.047708 | 0.961949 | 0.989949 |
| 19161 | RGS8      | 0.068630426 | 0.122454943 | 2.588555 | 0.047306 | 0.962269 | 0.989949 |
| 19181 | SNORA54   | 0.09238297  | 0.122453291 | 2.85974  | 0.04282  | 0.965845 | 0.989949 |
| 19176 | SNORA14E  | 0.072394966 | 0.122452654 | 2.91407  | 0.042021 | 0.966482 | 0.989949 |
| 19012 | C1orf14   | 0.071167567 | 0.122452654 | 2.91407  | 0.042021 | 0.966482 | 0.989949 |
| 19034 | FAM138D   | 0.047959867 | 0.122452409 | 2.91407  | 0.042021 | 0.966482 | 0.989949 |
| 19052 | HIST1H4F  | 0.049364881 | 0.122452409 | 2.91407  | 0.042021 | 0.966482 | 0.989949 |
| 19086 | CRNA0011  | 0.056599234 | 0.122452409 | 2.91407  | 0.042021 | 0.966482 | 0.989949 |
| 19096 | OR10G4    | 0.048037958 | 0.122452409 | 2.91407  | 0.042021 | 0.966482 | 0.989949 |
| 19100 | OR10V1    | 0.050038799 | 0.122452409 | 2.91407  | 0.042021 | 0.966482 | 0.989949 |
| 19105 | OR1L4     | 0.049031868 | 0.122452409 | 2.91407  | 0.042021 | 0.966482 | 0.989949 |
| 19136 | OR9I1     | 0.049398829 | 0.122452409 | 2.91407  | 0.042021 | 0.966482 | 0.989949 |
| 19150 | PRAMEF2   | 0.048900744 | 0.122452409 | 2.91407  | 0.042021 | 0.966482 | 0.989949 |
| 19179 | SNORA29   | 0.050451545 | 0.122452409 | 2.91407  | 0.042021 | 0.966482 | 0.989949 |
| 19072 | LOC440040 | 0.048205661 | 0.122452409 | 2.91407  | 0.042021 | 0.966482 | 0.989949 |
| 19165 | RPL10L    | 0.050280664 | 0.122452409 | 2.91407  | 0.042021 | 0.966482 | 0.989949 |
| 19187 | SPEM1     | 0.048634051 | 0.122452409 | 2.91407  | 0.042021 | 0.966482 | 0.989949 |
| 19164 | RNU6ATAC  | 0.030463495 | 0.122452164 | 2.91407  | 0.042021 | 0.966482 | 0.989949 |
| 19182 | SNORA55   | 0.030592725 | 0.122452164 | 2.91407  | 0.042021 | 0.966482 | 0.989949 |
| 19015 | C7orf72   | 0.029144021 | 0.122452164 | 2.91407  | 0.042021 | 0.966482 | 0.989949 |
| 19027 | DEFA6     | 0.030411723 | 0.122452164 | 2.91407  | 0.042021 | 0.966482 | 0.989949 |
| 19029 | DPPA3     | 0.029174081 | 0.122452164 | 2.91407  | 0.042021 | 0.966482 | 0.989949 |
| 19053 | HIST1H4K  | 0.029864509 | 0.122452164 | 2.91407  | 0.042021 | 0.966482 | 0.989949 |
| 19059 | KLHL1     | 0.029091132 | 0.122452164 | 2.91407  | 0.042021 | 0.966482 | 0.989949 |
| 19076 | LOC728276 | 0.031254283 | 0.122452164 | 2.91407  | 0.042021 | 0.966482 | 0.989949 |
| 19093 | OPN1LW    | 0.03043052  | 0.122452164 | 2.91407  | 0.042021 | 0.966482 | 0.989949 |
| 19095 | OR10A3    | 0.029848293 | 0.122452164 | 2.91407  | 0.042021 | 0.966482 | 0.989949 |
| 19099 | OR10H5    | 0.029594838 | 0.122452164 | 2.91407  | 0.042021 | 0.966482 | 0.989949 |
| 19103 | OR13G1    | 0.028591521 | 0.122452164 | 2.91407  | 0.042021 | 0.966482 | 0.989949 |
| 19111 | OR2V2     | 0.030475902 | 0.122452164 | 2.91407  | 0.042021 | 0.966482 | 0.989949 |
| 19119 | OR4S1     | 0.028683554 | 0.122452164 | 2.91407  | 0.042021 | 0.966482 | 0.989949 |

|       |           |             |             |         |          |          |          |
|-------|-----------|-------------|-------------|---------|----------|----------|----------|
| 19120 | OR51F1    | 0.030331886 | 0.122452164 | 2.91407 | 0.042021 | 0.966482 | 0.989949 |
| 19124 | OR5AP2    | 0.028945066 | 0.122452164 | 2.91407 | 0.042021 | 0.966482 | 0.989949 |
| 19125 | OR5M8     | 0.031205749 | 0.122452164 | 2.91407 | 0.042021 | 0.966482 | 0.989949 |
| 19127 | OR5W2     | 0.029149935 | 0.122452164 | 2.91407 | 0.042021 | 0.966482 | 0.989949 |
| 19131 | OR6T1     | 0.031233063 | 0.122452164 | 2.91407 | 0.042021 | 0.966482 | 0.989949 |
| 19134 | OR8I2     | 0.029144021 | 0.122452164 | 2.91407 | 0.042021 | 0.966482 | 0.989949 |
| 19147 | PPIAL4E   | 0.033566368 | 0.122452164 | 2.91407 | 0.042021 | 0.966482 | 0.989949 |
| 19175 | SMR3B     | 0.030738585 | 0.122452164 | 2.91407 | 0.042021 | 0.966482 | 0.989949 |
| 19192 | SSX8      | 0.029192832 | 0.122452164 | 2.91407 | 0.042021 | 0.966482 | 0.989949 |
| 19039 | FGF6      | 0.029516636 | 0.122452164 | 2.91407 | 0.042021 | 0.966482 | 0.989949 |
| 19064 | KRTAP27-1 | 0.030078554 | 0.122452164 | 2.91407 | 0.042021 | 0.966482 | 0.989949 |
| 19123 | OR52L1    | 0.028468418 | 0.122452164 | 2.91407 | 0.042021 | 0.966482 | 0.989949 |
| 19610 | BASE      | 0.010756599 | 0.122451919 | 2.91407 | 0.042021 | 0.966482 | NA       |
| 19618 | C11orf94  | 0.010756599 | 0.122451919 | 2.91407 | 0.042021 | 0.966482 | NA       |
| 19621 | C14orf70  | 0.009569956 | 0.122451919 | 2.91407 | 0.042021 | 0.966482 | NA       |
| 19630 | C20orf71  | 0.00968232  | 0.122451919 | 2.91407 | 0.042021 | 0.966482 | NA       |
| 19632 | C20orf85  | 0.010108809 | 0.122451919 | 2.91407 | 0.042021 | 0.966482 | NA       |
| 19643 | C7orf66   | 0.009678283 | 0.122451919 | 2.91407 | 0.042021 | 0.966482 | NA       |
| 19648 | CATSPER4  | 0.00968232  | 0.122451919 | 2.91407 | 0.042021 | 0.966482 | NA       |
| 19649 | CDX4      | 0.010058465 | 0.122451919 | 2.91407 | 0.042021 | 0.966482 | NA       |
| 19654 | CELA3A    | 0.009628185 | 0.122451919 | 2.91407 | 0.042021 | 0.966482 | NA       |
| 19678 | CXorf27   | 0.011008287 | 0.122451919 | 2.91407 | 0.042021 | 0.966482 | NA       |
| 19680 | CYMP      | 0.01044637  | 0.122451919 | 2.91407 | 0.042021 | 0.966482 | NA       |
| 19687 | DEFA5     | 0.009560525 | 0.122451919 | 2.91407 | 0.042021 | 0.966482 | NA       |
| 19693 | DEFB109P1 | 0.009761189 | 0.122451919 | 2.91407 | 0.042021 | 0.966482 | NA       |
| 19696 | DEFB112   | 0.010267177 | 0.122451919 | 2.91407 | 0.042021 | 0.966482 | NA       |
| 19711 | DHRS7C    | 0.009518957 | 0.122451919 | 2.91407 | 0.042021 | 0.966482 | NA       |
| 19724 | FAM99B    | 0.010127223 | 0.122451919 | 2.91407 | 0.042021 | 0.966482 | NA       |
| 19735 | FTMT      | 0.010870212 | 0.122451919 | 2.91407 | 0.042021 | 0.966482 | NA       |
| 19752 | GLYCAM1   | 0.013239872 | 0.122451919 | 2.91407 | 0.042021 | 0.966482 | NA       |
| 19765 | GUCY2GP   | 0.010870212 | 0.122451919 | 2.91407 | 0.042021 | 0.966482 | NA       |
| 19794 | IL31      | 0.009626576 | 0.122451919 | 2.91407 | 0.042021 | 0.966482 | NA       |
| 19796 | IQCF2     | 0.009678283 | 0.122451919 | 2.91407 | 0.042021 | 0.966482 | NA       |
| 19859 | LCE2D     | 0.01012949  | 0.122451919 | 2.91407 | 0.042021 | 0.966482 | NA       |
| 19871 | LIPM      | 0.010870212 | 0.122451919 | 2.91407 | 0.042021 | 0.966482 | NA       |
| 19883 | LOC339568 | 0.009862242 | 0.122451919 | 2.91407 | 0.042021 | 0.966482 | NA       |
| 19887 | LOC642929 | 0.010870212 | 0.122451919 | 2.91407 | 0.042021 | 0.966482 | NA       |
| 19893 | LOC727924 | 0.01044637  | 0.122451919 | 2.91407 | 0.042021 | 0.966482 | NA       |
| 19903 | MLN       | 0.009497346 | 0.122451919 | 2.91407 | 0.042021 | 0.966482 | NA       |
| 19908 | MS4A12    | 0.010756599 | 0.122451919 | 2.91407 | 0.042021 | 0.966482 | NA       |
| 19911 | MSGN1     | 0.009678283 | 0.122451919 | 2.91407 | 0.042021 | 0.966482 | NA       |
| 19924 | NKX1-2    | 0.010267177 | 0.122451919 | 2.91407 | 0.042021 | 0.966482 | NA       |
| 19939 | OR10H4    | 0.010194136 | 0.122451919 | 2.91407 | 0.042021 | 0.966482 | NA       |
| 19945 | OR10T2    | 0.011535339 | 0.122451919 | 2.91407 | 0.042021 | 0.966482 | NA       |
| 19975 | OR2M7     | 0.009678283 | 0.122451919 | 2.91407 | 0.042021 | 0.966482 | NA       |
| 19986 | OR4A5     | 0.010756599 | 0.122451919 | 2.91407 | 0.042021 | 0.966482 | NA       |
| 20019 | OR52E2    | 0.009678283 | 0.122451919 | 2.91407 | 0.042021 | 0.966482 | NA       |

|       |           |             |             |          |          |          |          |
|-------|-----------|-------------|-------------|----------|----------|----------|----------|
| 20020 | OR52E4    | 0.010058465 | 0.122451919 | 2.91407  | 0.042021 | 0.966482 | NA       |
| 20022 | OR52J3    | 0.009855685 | 0.122451919 | 2.91407  | 0.042021 | 0.966482 | NA       |
| 20052 | OR5P2     | 0.009676406 | 0.122451919 | 2.91407  | 0.042021 | 0.966482 | NA       |
| 20064 | OR6C68    | 0.011008287 | 0.122451919 | 2.91407  | 0.042021 | 0.966482 | NA       |
| 20089 | OR8G2     | 0.00968232  | 0.122451919 | 2.91407  | 0.042021 | 0.966482 | NA       |
| 20107 | PLGLA     | 0.009518957 | 0.122451919 | 2.91407  | 0.042021 | 0.966482 | NA       |
| 20114 | PPIAL4B   | 0.009567091 | 0.122451919 | 2.91407  | 0.042021 | 0.966482 | NA       |
| 20186 | SNORA14A  | 0.010959637 | 0.122451919 | 2.91407  | 0.042021 | 0.966482 | NA       |
| 20188 | SNORA1    | 0.011535339 | 0.122451919 | 2.91407  | 0.042021 | 0.966482 | NA       |
| 20212 | SNORA77   | 0.009678283 | 0.122451919 | 2.91407  | 0.042021 | 0.966482 | NA       |
| 20480 | TTY1B     | 0.00968232  | 0.122451919 | 2.91407  | 0.042021 | 0.966482 | NA       |
| 20486 | TTY6      | 0.010756599 | 0.122451919 | 2.91407  | 0.042021 | 0.966482 | NA       |
| 14664 | KPNA3     | 960.2171514 | 0.122435944 | 0.110137 | 1.111666 | 0.266282 | 0.355932 |
| 15063 | AP3S2     | 1814.48561  | 0.122375783 | 0.123969 | 0.98715  | 0.323569 | 0.42105  |
| 14633 | ARHGFB18  | 900.743414  | 0.122340098 | 0.109048 | 1.121894 | 0.261908 | 0.350803 |
| 14310 | IKBKB     | 791.1187544 | 0.122326491 | 0.09971  | 1.226826 | 0.219888 | 0.30119  |
| 15185 | ZCCHC2    | 497.9840054 | 0.122188211 | 0.128315 | 0.952253 | 0.340969 | 0.440129 |
| 15310 | WWP2      | 1385.553495 | 0.122155767 | 0.132922 | 0.919007 | 0.358092 | 0.458471 |
| 17243 | PCDHGB7   | 564.7998207 | 0.12212042  | 0.322872 | 0.378232 | 0.705259 | 0.801703 |
| 17711 | GLIPR1L1  | 0.573131784 | 0.122108588 | 0.460676 | 0.265064 | 0.79096  | 0.87537  |
| 14185 | C10orf46  | 1014.284059 | 0.122069455 | 0.096788 | 1.261205 | 0.207235 | 0.286319 |
| 16474 | D2HGDH    | 556.697618  | 0.121947223 | 0.210544 | 0.5792   | 0.562454 | 0.669216 |
| 14000 | ZC3H18    | 761.2003481 | 0.121704143 | 0.092328 | 1.318177 | 0.187444 | 0.262436 |
| 13301 | KIAA0319I | 2005.564124 | 0.121562559 | 0.078807 | 1.542541 | 0.122942 | 0.181174 |
| 15251 | NUDCD1    | 399.4512879 | 0.121458711 | 0.130273 | 0.932341 | 0.35116  | 0.451321 |
| 14090 | WDR26     | 2608.751234 | 0.121264642 | 0.093903 | 1.291381 | 0.196571 | 0.273456 |
| 17449 | DCHS2     | 77.78216123 | 0.121234253 | 0.370807 | 0.326947 | 0.743708 | 0.83543  |
| 14402 | AARS2     | 453.0620644 | 0.121204257 | 0.101227 | 1.197354 | 0.231169 | 0.314619 |
| 16463 | DBF4      | 192.2112858 | 0.121122029 | 0.207623 | 0.583375 | 0.559641 | 0.666313 |
| 16002 | IRAK2     | 206.860357  | 0.120820389 | 0.169536 | 0.712655 | 0.476059 | 0.583129 |
| 15695 | NAV2      | 706.4879582 | 0.120655984 | 0.149325 | 0.808008 | 0.419086 | 0.523384 |
| 15201 | HIVEP2    | 1182.17911  | 0.120589686 | 0.127301 | 0.94728  | 0.343496 | 0.442922 |
| 15930 | HECTD2    | 324.6837246 | 0.12057866  | 0.164198 | 0.734348 | 0.462736 | 0.569372 |
| 15733 | NUDT13    | 60.88469668 | 0.120405646 | 0.15147  | 0.794912 | 0.426664 | 0.531604 |
| 12683 | PDCD7     | 424.7874742 | 0.120250473 | 0.068991 | 1.742998 | 0.081334 | 0.125698 |
| 16665 | IL17RE    | 66.24843098 | 0.120212676 | 0.226796 | 0.530049 | 0.596078 | 0.701094 |
| 14315 | C10orf57  | 503.174632  | 0.119961039 | 0.097855 | 1.225909 | 0.220233 | 0.301557 |
| 14267 | C3orf1    | 1114.713851 | 0.11990363  | 0.096837 | 1.238198 | 0.215643 | 0.296265 |
| 14943 | TIMM9     | 514.9535457 | 0.119832714 | 0.117044 | 1.02383  | 0.305916 | 0.401275 |
| 15765 | VPS37B    | 653.3321585 | 0.119775003 | 0.152383 | 0.786011 | 0.431861 | 0.536948 |
| 15982 | DUSP6     | 2312.026992 | 0.11974012  | 0.166917 | 0.717364 | 0.47315  | 0.580288 |
| 14989 | BZW1      | 3459.999434 | 0.119546334 | 0.118386 | 1.009804 | 0.312589 | 0.40877  |
| 16951 | BTBD18    | 1.751405258 | 0.119458321 | 0.265255 | 0.450352 | 0.652457 | 0.75443  |
| 14802 | LDB1      | 1015.783865 | 0.119367958 | 0.112088 | 1.064947 | 0.2869   | 0.379916 |
| 15529 | JRK       | 410.5071871 | 0.119364545 | 0.140158 | 0.851641 | 0.394413 | 0.497836 |
| 17093 | LRRC50    | 13.54150663 | 0.119352117 | 0.287276 | 0.415462 | 0.677804 | 0.777231 |
| 14191 | USP15     | 886.7560232 | 0.119304704 | 0.094691 | 1.259936 | 0.207693 | 0.286871 |

|       |           |             |             |          |          |          |          |
|-------|-----------|-------------|-------------|----------|----------|----------|----------|
| 16950 | PLA1A     | 1439.033291 | 0.119286798 | 0.264817 | 0.45045  | 0.652386 | 0.75442  |
| 15528 | ARL6IP5   | 4686.646461 | 0.119002448 | 0.139708 | 0.851797 | 0.394327 | 0.497759 |
| 15242 | SUV39H2   | 126.6403154 | 0.118689827 | 0.126907 | 0.935252 | 0.349658 | 0.449656 |
| 17950 | ARMC4     | 3.859104615 | 0.118581562 | 0.546958 | 0.216802 | 0.828363 | 0.904503 |
| 16745 | GCAT      | 169.2693946 | 0.118575317 | 0.234347 | 0.505982 | 0.612869 | 0.717399 |
| 15473 | GPR180    | 362.5828169 | 0.11846781  | 0.136344 | 0.868888 | 0.384909 | 0.487597 |
| 14140 | PPWD1     | 436.3008103 | 0.118269239 | 0.092754 | 1.27509  | 0.202277 | 0.280399 |
| 14568 | SLU7      | 1184.537579 | 0.118225063 | 0.103169 | 1.145936 | 0.251822 | 0.338824 |
| 16279 | BMS1P4    | 23.31334714 | 0.118191916 | 0.186633 | 0.633285 | 0.526547 | 0.63392  |
| 12833 | CLP1      | 222.474746  | 0.118144889 | 0.069709 | 1.694826 | 0.090108 | 0.137631 |
| 14143 | GON4L     | 878.3453243 | 0.118067157 | 0.092694 | 1.273737 | 0.202757 | 0.281004 |
| 15221 | IRF2BP1   | 468.2318173 | 0.117971281 | 0.125175 | 0.942448 | 0.345963 | 0.445518 |
| 14577 | SLC38A9   | 189.1504189 | 0.117967431 | 0.10324  | 1.142653 | 0.253183 | 0.340442 |
| 14324 | RSAD1     | 758.4682006 | 0.117574836 | 0.096102 | 1.223439 | 0.221164 | 0.302641 |
| 13747 | CHERP     | 986.1853815 | 0.117541698 | 0.083786 | 1.40288  | 0.160653 | 0.229065 |
| 14672 | ZCCHC9    | 346.260559  | 0.117539421 | 0.105896 | 1.10995  | 0.267021 | 0.356725 |
| 13966 | FAM193A   | 663.2061439 | 0.117536797 | 0.088391 | 1.329732 | 0.183607 | 0.25767  |
| 15357 | TPRKB     | 343.8066286 | 0.117389968 | 0.129947 | 0.903365 | 0.366332 | 0.467572 |
| 15034 | MEM126A   | 305.8805574 | 0.117381993 | 0.117833 | 0.996174 | 0.319165 | 0.416147 |
| 15021 | ZNF195    | 408.2255642 | 0.117253825 | 0.117114 | 1.001194 | 0.316733 | 0.413307 |
| 16516 | ZNF219    | 596.5120597 | 0.117091401 | 0.206272 | 0.567655 | 0.570269 | 0.676789 |
| 16317 | SC4MOL    | 1323.598009 | 0.116965446 | 0.187439 | 0.624019 | 0.532615 | 0.63981  |
| 15000 | RNF139    | 956.527113  | 0.116905454 | 0.116084 | 1.007072 | 0.3139   | 0.410184 |
| 13372 | IWS1      | 938.0951379 | 0.116674508 | 0.076783 | 1.519542 | 0.128626 | 0.188543 |
| 14409 | NOL8      | 613.502223  | 0.116623333 | 0.097611 | 1.194776 | 0.232174 | 0.315834 |
| 15738 | C1orf56   | 160.0734933 | 0.116472856 | 0.146841 | 0.793192 | 0.427666 | 0.53264  |
| 14815 | NHLRC3    | 866.4416252 | 0.11641816  | 0.109859 | 1.059703 | 0.28928  | 0.382711 |
| 15678 | ASCC3     | 997.2545076 | 0.116408273 | 0.143114 | 0.813393 | 0.415993 | 0.520084 |
| 15804 | CDK16     | 2116.039326 | 0.11637662  | 0.150301 | 0.774291 | 0.438759 | 0.544172 |
| 13370 | VIPAR     | 466.9314751 | 0.116339221 | 0.076496 | 1.52086  | 0.128295 | 0.188086 |
| 14891 | ATP5SL    | 849.1212302 | 0.116277068 | 0.111916 | 1.038963 | 0.298822 | 0.393314 |
| 13612 | TARDBP    | 2884.763275 | 0.116071233 | 0.079939 | 1.452    | 0.146502 | 0.210959 |
| 13405 | CSTF3     | 498.8355049 | 0.115878256 | 0.076691 | 1.510969 | 0.130796 | 0.191253 |
| 14887 | C1orf107  | 626.6441283 | 0.115821317 | 0.111331 | 1.040331 | 0.298186 | 0.392608 |
| 14895 | C20orf112 | 788.7637928 | 0.115738479 | 0.111481 | 1.038192 | 0.299181 | 0.393705 |
| 15557 | TBL1XR1   | 3820.227855 | 0.115444736 | 0.136659 | 0.844766 | 0.398241 | 0.501763 |
| 15697 | SURF1     | 810.5369858 | 0.115376357 | 0.142829 | 0.807794 | 0.419209 | 0.523471 |
| 14029 | C7orf64   | 293.6908067 | 0.115086125 | 0.087755 | 1.311447 | 0.189707 | 0.265054 |
| 16006 | ACER3     | 506.9729015 | 0.11502167  | 0.161797 | 0.710903 | 0.477145 | 0.584313 |
| 15146 | RBAK      | 549.1878227 | 0.114953758 | 0.119605 | 0.961115 | 0.336494 | 0.43547  |
| 15799 | ITPKB     | 921.2514452 | 0.114888252 | 0.148064 | 0.775936 | 0.437787 | 0.543142 |
| 15109 | DNAJC18   | 236.8592408 | 0.114770284 | 0.117952 | 0.973028 | 0.33054  | 0.428811 |
| 16871 | SFTPD     | 21.18954715 | 0.11464873  | 0.242537 | 0.472707 | 0.636422 | 0.739406 |
| 14314 | EIF2C1    | 831.1731027 | 0.114549798 | 0.093412 | 1.226282 | 0.220093 | 0.301386 |
| 17079 | CA12      | 23952.20625 | 0.114355739 | 0.273663 | 0.417871 | 0.676041 | 0.77587  |
| 15338 | NUP155    | 448.0289117 | 0.114258802 | 0.125676 | 0.909157 | 0.363267 | 0.464233 |
| 16057 | TLE1      | 781.4997842 | 0.114081955 | 0.16377  | 0.6966   | 0.486053 | 0.593332 |

|       |           |             |             |          |          |          |          |
|-------|-----------|-------------|-------------|----------|----------|----------|----------|
| 17080 | CLDN18    | 5.626256895 | 0.114033662 | 0.273029 | 0.417661 | 0.676195 | 0.776001 |
| 15053 | PFAS      | 504.2910492 | 0.113881384 | 0.115092 | 0.989481 | 0.322428 | 0.419844 |
| 14530 | DCTN1     | 3728.531558 | 0.113797032 | 0.098406 | 1.156407 | 0.247515 | 0.333898 |
| 15160 | CLPTM1    | 3158.124145 | 0.113752996 | 0.118744 | 0.957967 | 0.338079 | 0.437117 |
| 16451 | FZD7      | 319.9450932 | 0.113741846 | 0.193972 | 0.586383 | 0.557618 | 0.66437  |
| 13931 | TRIM26    | 1233.159461 | 0.113578172 | 0.0847   | 1.340954 | 0.179936 | 0.25317  |
| 17034 | C10orf68  | 7.634225596 | 0.113420348 | 0.262107 | 0.432725 | 0.665215 | 0.765372 |
| 15056 | RAB2A     | 1134.053855 | 0.113413452 | 0.114763 | 0.988242 | 0.323034 | 0.420549 |
| 17144 | SYT6      | 28.06636611 | 0.113407809 | 0.283272 | 0.400349 | 0.6889   | 0.78763  |
| 16608 | TM6SF1    | 219.5145531 | 0.113380836 | 0.207101 | 0.547466 | 0.584058 | 0.689314 |
| 15358 | RNF19A    | 2007.116059 | 0.113377285 | 0.125515 | 0.903297 | 0.366369 | 0.467586 |
| 14813 | ZNF182    | 220.0551526 | 0.113349237 | 0.106844 | 1.060884 | 0.288743 | 0.382073 |
| 15626 | PGAP3     | 795.3507499 | 0.113323704 | 0.136942 | 0.827528 | 0.407938 | 0.511711 |
| 17499 | PDZD3     | 150.2321149 | 0.113306005 | 0.359685 | 0.315015 | 0.75275  | 0.843172 |
| 17354 | NEU4      | 5.892984479 | 0.113251085 | 0.321988 | 0.351724 | 0.725045 | 0.818924 |
| 16011 | SPRED1    | 1635.566936 | 0.113243779 | 0.159847 | 0.708449 | 0.478666 | 0.585993 |
| 14759 | SURF6     | 532.9979077 | 0.113192957 | 0.104639 | 1.081746 | 0.279365 | 0.371017 |
| 13243 | YTHDF1    | 1213.783252 | 0.113055963 | 0.072235 | 1.565119 | 0.117555 | 0.173993 |
| 17267 | MRO       | 142.6852282 | 0.112982575 | 0.301679 | 0.374512 | 0.708023 | 0.803799 |
| 14954 | TXNL1     | 1416.3183   | 0.112942398 | 0.110539 | 1.021744 | 0.306902 | 0.402273 |
| 18397 | C20orf114 | 0.875520779 | 0.11280378  | 0.875218 | 0.128886 | 0.897447 | 0.956181 |
| 16207 | LRRC27    | 232.3149502 | 0.112285023 | 0.171865 | 0.653334 | 0.513541 | 0.621084 |
| 16989 | RBM44     | 7.806136736 | 0.112093102 | 0.253678 | 0.441872 | 0.658582 | 0.759836 |
| 15226 | SSR1      | 4013.517065 | 0.111998149 | 0.119152 | 0.939957 | 0.347239 | 0.447014 |
| 16246 | RAB38     | 217.3134223 | 0.111964395 | 0.1746   | 0.641263 | 0.521352 | 0.629017 |
| 16049 | DNAH14    | 60.81591892 | 0.11192951  | 0.160419 | 0.697734 | 0.485344 | 0.592761 |
| 15791 | ACTR2     | 6839.130018 | 0.111916799 | 0.143713 | 0.778751 | 0.436127 | 0.54134  |
| 17353 | HIST1H2AM | 5.400035444 | 0.111750815 | 0.3177   | 0.351749 | 0.725027 | 0.818924 |
| 15340 | LOC285359 | 59.95094244 | 0.111492196 | 0.122809 | 0.907848 | 0.363959 | 0.465056 |
| 15667 | ZNF821    | 171.0566641 | 0.111480441 | 0.136379 | 0.81743  | 0.413683 | 0.517559 |
| 14991 | ZFP64     | 343.6772809 | 0.111459945 | 0.110426 | 1.009364 | 0.3128   | 0.408991 |
| 17119 | SLC25A18  | 31.80944992 | 0.111324158 | 0.27363  | 0.406842 | 0.684124 | 0.783335 |
| 16382 | C1orf204  | 41.2048185  | 0.111244159 | 0.183877 | 0.604993 | 0.545184 | 0.65231  |
| 16619 | UBE2NL    | 4.673185856 | 0.111166144 | 0.204444 | 0.543747 | 0.586615 | 0.691874 |
| 14841 | TXNDC15   | 1812.219574 | 0.111159798 | 0.105445 | 1.054199 | 0.291792 | 0.385379 |
| 17201 | CDH6      | 3664.105545 | 0.111097611 | 0.286856 | 0.387294 | 0.698539 | 0.796004 |
| 15652 | ANKRD28   | 861.0964134 | 0.111093433 | 0.134925 | 0.82219  | 0.410969 | 0.514656 |
| 14902 | WDR1      | 6374.273284 | 0.110887489 | 0.107081 | 1.035543 | 0.300415 | 0.395144 |
| 16406 | TP53INP1  | 1602.888939 | 0.110838568 | 0.184707 | 0.600078 | 0.548454 | 0.655263 |
| 17601 | PCP2      | 7.739910491 | 0.110809149 | 0.377659 | 0.29341  | 0.769208 | 0.856614 |
| 14476 | IFT46     | 578.3229991 | 0.110747235 | 0.094221 | 1.175399 | 0.239835 | 0.324745 |
| 12989 | THRAP3    | 2649.281837 | 0.110731389 | 0.067194 | 1.647947 | 0.099364 | 0.149944 |
| 18503 | PROKR2    | 0.615254575 | 0.110684446 | 1.001975 | 0.110466 | 0.91204  | 0.966162 |
| 17078 | RP1L1     | 5.54794929  | 0.110620966 | 0.264493 | 0.418238 | 0.675773 | 0.775608 |
| 14375 | CSRP2BP   | 560.8371679 | 0.110471666 | 0.091671 | 1.205083 | 0.228171 | 0.311123 |
| 17858 | NRXN1     | 2.382218181 | 0.110131456 | 0.467661 | 0.235494 | 0.813825 | 0.893444 |
| 14659 | RPAP1     | 507.5544162 | 0.110024577 | 0.09881  | 1.113497 | 0.265495 | 0.355002 |

|       |          |             |             |          |          |          |          |
|-------|----------|-------------|-------------|----------|----------|----------|----------|
| 13795 | DCTN5    | 1330.937243 | 0.10991884  | 0.079207 | 1.387748 | 0.165214 | 0.234749 |
| 16876 | VEGFA    | 28892.11738 | 0.109819403 | 0.233196 | 0.470933 | 0.637689 | 0.740658 |
| 17527 | C8orf80  | 40.46912824 | 0.109556385 | 0.355619 | 0.308073 | 0.758027 | 0.847726 |
| 15198 | AHSA1    | 1365.53436  | 0.109555067 | 0.115589 | 0.947797 | 0.343233 | 0.442646 |
| 16865 | TTC39A   | 1137.402164 | 0.109507631 | 0.230508 | 0.475071 | 0.634736 | 0.737709 |
| 15802 | RUSC2    | 1034.628303 | 0.109502885 | 0.141191 | 0.775565 | 0.438006 | 0.543308 |
| 16602 | ZNF185   | 546.660687  | 0.109491964 | 0.19963  | 0.548476 | 0.583365 | 0.688909 |
| 15346 | CACYBP   | 1148.786304 | 0.109483792 | 0.120839 | 0.906034 | 0.364918 | 0.466099 |
| 17482 | TUBB8    | 3.035796482 | 0.109456893 | 0.343514 | 0.318639 | 0.75     | 0.840908 |
| 16355 | RAGE     | 153.2179761 | 0.109453696 | 0.178762 | 0.612288 | 0.540347 | 0.647591 |
| 17045 | AGBL3    | 30.37354061 | 0.109379634 | 0.255425 | 0.428226 | 0.668486 | 0.76864  |
| 15820 | DAP      | 3662.813446 | 0.10929382  | 0.141905 | 0.770193 | 0.441186 | 0.54663  |
| 16247 | CROCCL1  | 299.1956073 | 0.1092396   | 0.170549 | 0.640517 | 0.521837 | 0.629486 |
| 16445 | PAX6     | 84.67252531 | 0.109164265 | 0.185621 | 0.588103 | 0.556463 | 0.663222 |
| 15653 | ORAOV1   | 206.587505  | 0.108983256 | 0.132714 | 0.821186 | 0.41154  | 0.515325 |
| 13393 | NOL7     | 678.4678847 | 0.108823255 | 0.071936 | 1.512782 | 0.130335 | 0.190749 |
| 16898 | WSCD1    | 649.3320825 | 0.108767231 | 0.233478 | 0.465856 | 0.641318 | 0.743943 |
| 15281 | SKA2     | 624.6293994 | 0.108701527 | 0.117456 | 0.925463 | 0.354725 | 0.455007 |
| 14783 | CXorf42  | 21.50890988 | 0.108694443 | 0.101261 | 1.073404 | 0.28309  | 0.375353 |
| 15028 | PPP2R5D  | 1000.161323 | 0.108611434 | 0.108859 | 0.997725 | 0.318413 | 0.415306 |
| 17365 | FOLR1    | 1032.147846 | 0.108511773 | 0.310422 | 0.349562 | 0.726668 | 0.820237 |
| 15511 | SPCS2    | 902.7546066 | 0.108271867 | 0.126474 | 0.856082 | 0.391953 | 0.495304 |
| 14233 | WBP11    | 1703.52917  | 0.108127379 | 0.086607 | 1.248487 | 0.211853 | 0.291754 |
| 16504 | ESAM     | 2341.602318 | 0.108091747 | 0.188998 | 0.57192  | 0.567376 | 0.673845 |
| 16615 | INE1     | 23.15918504 | 0.108068838 | 0.19841  | 0.544674 | 0.585978 | 0.691288 |
| 15398 | SLC11A2  | 1282.992355 | 0.108061995 | 0.121323 | 0.890697 | 0.373092 | 0.47493  |
| 15669 | CYB5R1   | 1351.534813 | 0.108045588 | 0.132385 | 0.816149 | 0.414415 | 0.518409 |
| 13676 | CDK13    | 1083.376267 | 0.107895149 | 0.075532 | 1.428472 | 0.153156 | 0.21951  |
| 17061 | RNF207   | 241.9515302 | 0.107546533 | 0.25366  | 0.423979 | 0.671581 | 0.771564 |
| 13700 | ZNF410   | 848.4762928 | 0.107535105 | 0.075851 | 1.417713 | 0.156275 | 0.223598 |
| 14431 | LARP1    | 5139.092151 | 0.10722367  | 0.09022  | 1.188469 | 0.234649 | 0.318713 |
| 14886 | PIAS4    | 226.2161451 | 0.107081191 | 0.102899 | 1.040647 | 0.29804  | 0.392441 |
| 17220 | BCL11A   | 53.85425426 | 0.106792851 | 0.277946 | 0.384222 | 0.700814 | 0.797715 |
| 16275 | AFAP1L1  | 876.0334555 | 0.106683025 | 0.168385 | 0.633566 | 0.526364 | 0.633849 |
| 17318 | NMNAT2   | 52.35629922 | 0.106576393 | 0.294092 | 0.362391 | 0.71706  | 0.811606 |
| 15445 | UBE2E1   | 1099.452411 | 0.106212131 | 0.121393 | 0.874943 | 0.381605 | 0.484288 |
| 17271 | TUBA8    | 121.758147  | 0.106046796 | 0.283359 | 0.374249 | 0.708219 | 0.803799 |
| 14621 | MEAF6    | 1072.112179 | 0.105672865 | 0.093807 | 1.126488 | 0.259959 | 0.348502 |
| 16666 | BARD1    | 41.56319577 | 0.105625319 | 0.199359 | 0.529824 | 0.596234 | 0.701193 |
| 16388 | TMEM182  | 135.737426  | 0.105590123 | 0.174965 | 0.603494 | 0.54618  | 0.653279 |
| 15755 | PNPO     | 1475.753098 | 0.105589195 | 0.133944 | 0.78831  | 0.430515 | 0.53561  |
| 15914 | ATP5O    | 3576.552934 | 0.105527709 | 0.143046 | 0.737717 | 0.460686 | 0.567419 |
| 15478 | LRRC37B  | 116.3722933 | 0.105505713 | 0.121672 | 0.867135 | 0.385868 | 0.488638 |
| 14296 | PPP3CC   | 417.002186  | 0.105315046 | 0.085592 | 1.230437 | 0.218533 | 0.299627 |
| 15497 | ITFG2    | 530.392666  | 0.105250041 | 0.122037 | 0.862444 | 0.388443 | 0.491313 |
| 16671 | FLJ42709 | 76.98920254 | 0.105189318 | 0.199521 | 0.527209 | 0.598049 | 0.703158 |
| 17592 | C9orf169 | 3.983715062 | 0.105186583 | 0.356023 | 0.295449 | 0.767651 | 0.855316 |



|       |           |             |             |          |          |          |          |
|-------|-----------|-------------|-------------|----------|----------|----------|----------|
| 16572 | C3orf58   | 829.7839057 | 0.105054186 | 0.189644 | 0.553955 | 0.579609 | 0.685508 |
| 16380 | C12orf60  | 45.45719742 | 0.10494342  | 0.173333 | 0.605445 | 0.544883 | 0.65203  |
| 16085 | IFRD1     | 873.5201451 | 0.104753484 | 0.152552 | 0.686675 | 0.492288 | 0.599896 |
| 16054 | MEGF8     | 1880.241586 | 0.104688363 | 0.150253 | 0.696747 | 0.485961 | 0.59333  |
| 15116 | TJAP1     | 543.4281141 | 0.104640192 | 0.107857 | 0.970177 | 0.331958 | 0.430452 |
| 16081 | NEK3      | 202.2121982 | 0.104589226 | 0.152041 | 0.687903 | 0.491514 | 0.599102 |
| 14704 | FNTA      | 1260.806945 | 0.104588694 | 0.095335 | 1.097071 | 0.272611 | 0.3634   |
| 16607 | ARHGEF3   | 10.88765409 | 0.104576599 | 0.191    | 0.547523 | 0.58402  | 0.68931  |
| 15677 | TTNBP2N   | 1094.416691 | 0.104561579 | 0.128459 | 0.813967 | 0.415664 | 0.519706 |
| 16727 | CPD       | 4480.798838 | 0.104392168 | 0.203548 | 0.512862 | 0.608048 | 0.71248  |
| 15154 | TMEM188   | 385.8141079 | 0.104344328 | 0.108837 | 0.958719 | 0.3377   | 0.436816 |
| 16630 | CAMK1D    | 97.71756333 | 0.104238347 | 0.192674 | 0.541008 | 0.588502 | 0.69364  |
| 13995 | NCBP2     | 1513.711651 | 0.104219401 | 0.078971 | 1.319714 | 0.186931 | 0.261825 |
| 15033 | TIGD6     | 193.4149958 | 0.104152069 | 0.104556 | 0.996137 | 0.319184 | 0.416147 |
| 14434 | C2CD3     | 480.197358  | 0.103934281 | 0.087472 | 1.188195 | 0.234757 | 0.318793 |
| 15232 | MASTL     | 259.3968581 | 0.103917836 | 0.110759 | 0.938231 | 0.348126 | 0.447979 |
| 14915 | PPP1R10   | 1808.66664  | 0.103904937 | 0.100696 | 1.031865 | 0.302135 | 0.397073 |
| 16650 | SLC37A4   | 3943.184405 | 0.103732264 | 0.194132 | 0.534338 | 0.593108 | 0.698228 |
| 15361 | TRIM25    | 951.3782986 | 0.103730907 | 0.11497  | 0.902247 | 0.366926 | 0.468206 |
| 16281 | SLC35D1   | 912.6484369 | 0.103685415 | 0.163707 | 0.633361 | 0.526498 | 0.63392  |
| 17161 | LHX4      | 7.847791019 | 0.103570459 | 0.261656 | 0.395826 | 0.692233 | 0.790657 |
| 14637 | CCDC90B   | 725.5682236 | 0.103546262 | 0.092342 | 1.121331 | 0.262147 | 0.351043 |
| 15923 | CDKL3     | 46.96420311 | 0.103250827 | 0.140412 | 0.735342 | 0.462131 | 0.568877 |
| 16176 | ATP6V0A1  | 2248.13249  | 0.103191271 | 0.156161 | 0.6608   | 0.50874  | 0.616458 |
| 15118 | C4orf43   | 329.2124912 | 0.103039066 | 0.106459 | 0.967873 | 0.333108 | 0.431886 |
| 16691 | CDH5      | 2960.655893 | 0.103034017 | 0.197924 | 0.520574 | 0.602664 | 0.707693 |
| 15427 | UBE2J1    | 2115.28795  | 0.103019437 | 0.116919 | 0.88112  | 0.378253 | 0.480594 |
| 15935 | UBA6      | 1142.285731 | 0.103019251 | 0.140811 | 0.731613 | 0.464405 | 0.571245 |
| 15969 | ZNF331    | 454.8945494 | 0.102995915 | 0.14248  | 0.722881 | 0.469753 | 0.576594 |
| 14502 | POLB      | 203.9371693 | 0.102952809 | 0.088183 | 1.167496 | 0.24301  | 0.328454 |
| 15773 | MTERFD1   | 332.5094972 | 0.102746198 | 0.13109  | 0.783783 | 0.433168 | 0.538295 |
| 14860 | MLL5      | 1990.989618 | 0.102568339 | 0.097687 | 1.049968 | 0.293733 | 0.387447 |
| 17770 | NRADDP    | 1.009652934 | 0.102548488 | 0.405881 | 0.252656 | 0.800534 | 0.88302  |
| 15903 | DRAM1     | 2226.152178 | 0.102302928 | 0.137988 | 0.741388 | 0.458458 | 0.565038 |
| 16325 | SLC12A7   | 3949.951564 | 0.102284052 | 0.164766 | 0.620785 | 0.534741 | 0.64205  |
| 15360 | SR140     | 1989.205692 | 0.102115703 | 0.113152 | 0.902467 | 0.366809 | 0.468087 |
| 16274 | ZFP2      | 67.68140693 | 0.101973666 | 0.160889 | 0.633814 | 0.526202 | 0.633777 |
| 15171 | ANKHD1    | 2417.027837 | 0.101918524 | 0.106654 | 0.955595 | 0.339277 | 0.438299 |
| 15319 | SLC7A6OS  | 167.1709579 | 0.101862799 | 0.111258 | 0.915556 | 0.3599   | 0.4605   |
| 14719 | GABPB1    | 368.6580541 | 0.101811397 | 0.0932   | 1.092401 | 0.274657 | 0.36573  |
| 16423 | CDK14     | 1008.99683  | 0.101680716 | 0.170333 | 0.596952 | 0.55054  | 0.656994 |
| 16072 | TMEM143   | 254.5541572 | 0.10167257  | 0.147031 | 0.691504 | 0.489249 | 0.596675 |
| 15734 | KANK2     | 2788.651975 | 0.101280683 | 0.127492 | 0.794406 | 0.426959 | 0.531894 |
| 14857 | LYSMD1    | 213.4645168 | 0.101088781 | 0.096242 | 1.050359 | 0.293553 | 0.387262 |
| 17030 | OC1001327 | 2.479065115 | 0.101059728 | 0.232897 | 0.433924 | 0.664344 | 0.764656 |
| 16328 | KDEL2     | 2019.340201 | 0.10097326  | 0.162728 | 0.620504 | 0.534926 | 0.642154 |
| 16788 | CD24      | 41629.35246 | 0.100701274 | 0.204415 | 0.492632 | 0.622273 | 0.726541 |

|       |           |             |             |          |          |          |          |
|-------|-----------|-------------|-------------|----------|----------|----------|----------|
| 17930 | KCNN1     | 57.63120136 | 0.100550729 | 0.451768 | 0.222571 | 0.823869 | 0.900616 |
| 15085 | ELP2      | 1205.217971 | 0.100296179 | 0.102309 | 0.980327 | 0.326925 | 0.424797 |
| 15492 | C7orf36   | 209.5656814 | 0.100179677 | 0.115931 | 0.864131 | 0.387516 | 0.490299 |
| 15510 | LOC90110  | 218.3418291 | 0.100050145 | 0.116817 | 0.856469 | 0.391738 | 0.495065 |
| 14793 | COPA      | 5755.053521 | 0.099917197 | 0.093417 | 1.069585 | 0.284806 | 0.377373 |
| 15633 | EAF1      | 763.8213268 | 0.099762163 | 0.12073  | 0.826327 | 0.408618 | 0.512304 |
| 15744 | PCYT1A    | 445.589288  | 0.099598476 | 0.125862 | 0.79133  | 0.428751 | 0.533854 |
| 15594 | CDV3      | 3528.01409  | 0.099527892 | 0.118947 | 0.836739 | 0.402739 | 0.506226 |
| 14973 | IKZF4     | 241.1937338 | 0.099168468 | 0.097682 | 1.015212 | 0.310005 | 0.405824 |
| 15148 | RWDD2B    | 361.2661807 | 0.099092089 | 0.10316  | 0.960569 | 0.336769 | 0.435767 |
| 16945 | PHLDA1    | 3932.415686 | 0.099008522 | 0.21955  | 0.450961 | 0.652018 | 0.754234 |
| 15380 | PSMG2     | 930.5244181 | 0.098928637 | 0.110599 | 0.894478 | 0.371066 | 0.472904 |
| 15245 | INPPL1    | 2203.022871 | 0.098872513 | 0.105797 | 0.934551 | 0.35002  | 0.450039 |
| 17403 | HIST1H1C  | 1445.397952 | 0.098409972 | 0.289058 | 0.340451 | 0.733517 | 0.82616  |
| 15462 | MBNL1     | 4240.294484 | 0.098361739 | 0.112802 | 0.871982 | 0.383218 | 0.485801 |
| 17371 | PCDHAC1   | 15.78527764 | 0.09809598  | 0.281735 | 0.348186 | 0.727701 | 0.821119 |
| 14566 | TRAPPC4   | 912.9132356 | 0.097938923 | 0.085455 | 1.146082 | 0.251761 | 0.338787 |
| 17049 | GJA4      | 1022.697875 | 0.097893982 | 0.229083 | 0.42733  | 0.669139 | 0.769278 |
| 14399 | OGFOD1    | 722.3316052 | 0.097838747 | 0.081677 | 1.197873 | 0.230967 | 0.314409 |
| 16114 | ZBTB8A    | 161.7905943 | 0.097825168 | 0.144602 | 0.676514 | 0.498714 | 0.606634 |
| 14744 | VPS29     | 1473.665728 | 0.097820814 | 0.090128 | 1.085356 | 0.277764 | 0.369265 |
| 17002 | SGK196    | 20.68496692 | 0.097813157 | 0.222926 | 0.438771 | 0.660828 | 0.761845 |
| 15863 | RNF31     | 755.9063935 | 0.097509105 | 0.12916  | 0.754947 | 0.450281 | 0.556386 |
| 15544 | COG5      | 927.8962185 | 0.097286914 | 0.114698 | 0.848201 | 0.396326 | 0.499767 |
| 17416 | EGLN3     | 11629.01652 | 0.097231457 | 0.288124 | 0.337463 | 0.735768 | 0.828034 |
| 15230 | LRRC28    | 248.8272384 | 0.097211991 | 0.103536 | 0.938916 | 0.347774 | 0.447585 |
| 15953 | ACSL4     | 1995.110193 | 0.097098962 | 0.133724 | 0.726113 | 0.467769 | 0.574735 |
| 16888 | ISP90AB2I | 32.92769669 | 0.097094714 | 0.207604 | 0.467693 | 0.640004 | 0.742775 |
| 15994 | NME6      | 138.7770704 | 0.097045681 | 0.135804 | 0.7146   | 0.474856 | 0.581959 |
| 14122 | CCNK      | 723.0164781 | 0.097033805 | 0.075761 | 1.280786 | 0.200269 | 0.277968 |
| 16749 | LOC389333 | 42.22549561 | 0.096976024 | 0.192009 | 0.50506  | 0.613516 | 0.717985 |
| 15899 | TIMM44    | 651.58274   | 0.096969491 | 0.130561 | 0.742715 | 0.457654 | 0.564217 |
| 17779 | CCL3L3    | 6.931991353 | 0.096913802 | 0.387769 | 0.249926 | 0.802644 | 0.8849   |
| 15749 | TMEM203   | 745.3983872 | 0.096909296 | 0.122602 | 0.790437 | 0.429273 | 0.534267 |
| 17558 | MS4A2     | 34.49910558 | 0.096860404 | 0.321675 | 0.301112 | 0.763329 | 0.852148 |
| 16110 | HIATL2    | 19.27618136 | 0.096780826 | 0.142764 | 0.67791  | 0.497829 | 0.605707 |
| 16449 | LITAF     | 5107.415788 | 0.096673068 | 0.164782 | 0.586674 | 0.557423 | 0.664237 |
| 16511 | ZNF391    | 29.99478877 | 0.096610316 | 0.169894 | 0.568649 | 0.569594 | 0.676193 |
| 16014 | B3GNT1    | 1194.524827 | 0.09653844  | 0.136446 | 0.707521 | 0.479243 | 0.586589 |
| 15073 | ACAD9     | 928.5257724 | 0.096029323 | 0.09746  | 0.985318 | 0.324468 | 0.42194  |
| 16921 | C2orf77   | 85.5581208  | 0.095978279 | 0.208907 | 0.459431 | 0.645925 | 0.748228 |
| 15813 | RAD18     | 114.9919106 | 0.095962809 | 0.124162 | 0.772884 | 0.439591 | 0.544895 |
| 15943 | PDLIM5    | 3612.89756  | 0.095949022 | 0.131863 | 0.727643 | 0.466832 | 0.573943 |
| 16141 | ZNF788    | 116.5529073 | 0.095941966 | 0.143507 | 0.668555 | 0.50378  | 0.61177  |
| 16108 | HFE       | 309.1940832 | 0.095896295 | 0.141435 | 0.678023 | 0.497757 | 0.605663 |
| 15229 | NAT15     | 1510.055795 | 0.095792695 | 0.101975 | 0.939372 | 0.34754  | 0.447338 |
| 15405 | ST7L      | 252.2508642 | 0.095711552 | 0.107596 | 0.889547 | 0.373709 | 0.4755   |

|       |           |             |             |          |          |          |          |
|-------|-----------|-------------|-------------|----------|----------|----------|----------|
| 17539 | ATP1A2    | 107.350749  | 0.095612102 | 0.312734 | 0.30573  | 0.75981  | 0.849139 |
| 15782 | SLC26A11  | 334.4582106 | 0.095471983 | 0.122249 | 0.780961 | 0.434825 | 0.540047 |
| 14177 | HNRNPF    | 3481.319033 | 0.095460263 | 0.075532 | 1.263831 | 0.206291 | 0.285216 |
| 16684 | NBPF10    | 402.5435317 | 0.09506906  | 0.18187  | 0.522732 | 0.601161 | 0.706267 |
| 14985 | SMAP1     | 756.7173374 | 0.094954411 | 0.093975 | 1.010421 | 0.312294 | 0.408514 |
| 16087 | C19orf55  | 71.29555087 | 0.094933253 | 0.138463 | 0.685624 | 0.49295  | 0.600629 |
| 18291 | C12orf56  | 33.73584135 | 0.094711986 | 0.651757 | 0.145318 | 0.88446  | 0.947805 |
| 17963 | FAM3B     | 14.0243878  | 0.094692887 | 0.442361 | 0.214063 | 0.830498 | 0.906229 |
| 14274 | EXOSC9    | 424.9925617 | 0.094638463 | 0.076577 | 1.235862 | 0.21651  | 0.297311 |
| 14677 | XRCC5     | 5945.855258 | 0.094630593 | 0.085345 | 1.108797 | 0.267518 | 0.357267 |
| 16459 | RBM6      | 1029.981741 | 0.094509375 | 0.161524 | 0.585111 | 0.558473 | 0.665084 |
| 15395 | DUT       | 849.1958911 | 0.094323032 | 0.105792 | 0.891591 | 0.372612 | 0.474412 |
| 16027 | HECA      | 921.6731583 | 0.094321705 | 0.134223 | 0.702722 | 0.482229 | 0.589729 |
| 16588 | LOC153684 | 43.13771952 | 0.094293196 | 0.171151 | 0.550936 | 0.581678 | 0.687332 |
| 16259 | TCEA1     | 1565.271226 | 0.094293066 | 0.147779 | 0.638068 | 0.523429 | 0.631019 |
| 17798 | NOX5      | 9.209069472 | 0.094156756 | 0.382045 | 0.246455 | 0.80533  | 0.886898 |
| 17187 | KIAA0802  | 569.1839485 | 0.094116722 | 0.241234 | 0.390146 | 0.696428 | 0.794245 |
| 15812 | THUMPD2   | 196.7149224 | 0.093787179 | 0.121317 | 0.773077 | 0.439477 | 0.544788 |
| 14130 | USP48     | 1077.807485 | 0.093523447 | 0.073105 | 1.279304 | 0.20079  | 0.278534 |
| 15604 | FAM122C   | 27.35675961 | 0.093383611 | 0.111987 | 0.833877 | 0.40435  | 0.507925 |
| 15794 | SCLT1     | 173.7654825 | 0.093311758 | 0.120066 | 0.777171 | 0.437058 | 0.542407 |
| 13725 | RAB5B     | 4101.297894 | 0.093301678 | 0.066182 | 1.409765 | 0.158609 | 0.226513 |
| 15585 | SBDSP1    | 544.6543232 | 0.093178461 | 0.111032 | 0.839203 | 0.401355 | 0.504753 |
| 15732 | FLJ33630  | 414.5333792 | 0.09310574  | 0.117136 | 0.794853 | 0.426699 | 0.531604 |
| 16566 | ST7OT1    | 35.61114062 | 0.092966203 | 0.167475 | 0.555105 | 0.578823 | 0.684867 |
| 17183 | KLF5      | 304.4518833 | 0.092411671 | 0.236578 | 0.390618 | 0.696079 | 0.794032 |
| 16900 | CELSR2    | 1279.026621 | 0.092307547 | 0.198298 | 0.4655   | 0.641574 | 0.744112 |
| 16245 | GPR125    | 677.1106523 | 0.092093194 | 0.143487 | 0.641822 | 0.520989 | 0.628618 |
| 17055 | SPDYE5    | 9.74869418  | 0.091974475 | 0.215733 | 0.426335 | 0.669864 | 0.769862 |
| 15972 | USP20     | 517.4258798 | 0.091948433 | 0.127453 | 0.721432 | 0.470643 | 0.577578 |
| 16832 | ZMAT3     | 256.051057  | 0.091732647 | 0.19005  | 0.482676 | 0.629326 | 0.732855 |
| 16544 | AMOTL2    | 2201.391715 | 0.091639963 | 0.163298 | 0.561182 | 0.574674 | 0.680862 |
| 16310 | BEND3     | 81.7687532  | 0.091539727 | 0.146364 | 0.625424 | 0.531693 | 0.638977 |
| 13854 | SPOP      | 1084.832406 | 0.091468353 | 0.066891 | 1.367422 | 0.171493 | 0.242633 |
| 15864 | DHX30     | 1182.695358 | 0.091460672 | 0.121268 | 0.754203 | 0.450727 | 0.556903 |
| 16822 | ADAM9     | 4642.580427 | 0.091288261 | 0.188248 | 0.484936 | 0.627722 | 0.731416 |
| 15082 | CNBP      | 6802.691321 | 0.091239539 | 0.092792 | 0.983267 | 0.325476 | 0.422998 |
| 18629 | AGR3      | 1.23684732  | 0.091144353 | 0.994113 | 0.091684 | 0.926949 | 0.975314 |
| 17162 | ANXA9     | 122.6642636 | 0.090808331 | 0.22953  | 0.395628 | 0.69238  | 0.790778 |
| 14483 | CWC27     | 400.3203719 | 0.090758873 | 0.077362 | 1.173173 | 0.240726 | 0.325794 |
| 16908 | SNHG7     | 568.6223523 | 0.090582298 | 0.195386 | 0.463608 | 0.642929 | 0.745347 |
| 15139 | CSTF2     | 224.1551583 | 0.090531128 | 0.093994 | 0.963163 | 0.335466 | 0.434339 |
| 16616 | ECH1      | 5166.178858 | 0.090332659 | 0.165899 | 0.544504 | 0.586095 | 0.691376 |
| 18070 | LGR5      | 2.434050246 | 0.090303925 | 0.468982 | 0.192553 | 0.847309 | 0.919098 |
| 16068 | PTENP1    | 301.0353516 | 0.090024383 | 0.130048 | 0.69224  | 0.488787 | 0.59626  |
| 17310 | C6orf154  | 42.22644654 | 0.089828119 | 0.246358 | 0.364624 | 0.715392 | 0.810075 |
| 17437 | PDE3A     | 280.261638  | 0.089363697 | 0.270666 | 0.330163 | 0.741277 | 0.833273 |

|       |           |             |             |          |          |          |          |
|-------|-----------|-------------|-------------|----------|----------|----------|----------|
| 14926 | SUPV3L1   | 513.8372663 | 0.089214325 | 0.086753 | 1.028377 | 0.303773 | 0.398918 |
| 17896 | RAPSN     | 1.991065461 | 0.089035506 | 0.390115 | 0.228229 | 0.819468 | 0.897441 |
| 15955 | PNO1      | 531.260838  | 0.088733911 | 0.122219 | 0.726022 | 0.467825 | 0.574757 |
| 15618 | PAPSS1    | 1023.781691 | 0.088707846 | 0.106727 | 0.831164 | 0.405881 | 0.509391 |
| 16257 | IPO13     | 937.0005316 | 0.088605169 | 0.138822 | 0.638265 | 0.523301 | 0.630903 |
| 16777 | ARHGGEF3  | 496.5769243 | 0.088441413 | 0.177979 | 0.496922 | 0.619244 | 0.723479 |
| 16589 | RAB36     | 560.6585161 | 0.088435249 | 0.160557 | 0.550803 | 0.581769 | 0.687398 |
| 16732 | FLJ40852  | 37.44260575 | 0.088204387 | 0.172829 | 0.510356 | 0.609802 | 0.714364 |
| 15964 | LRPAP1    | 2784.324918 | 0.087992044 | 0.121587 | 0.723694 | 0.469253 | 0.576161 |
| 16911 | SYT11     | 849.1118507 | 0.087942309 | 0.190196 | 0.462378 | 0.64381  | 0.74622  |
| 14506 | HNRPUL    | 2838.474097 | 0.087852499 | 0.075423 | 1.164797 | 0.244101 | 0.329838 |
| 16439 | JHDM1D    | 716.3796131 | 0.087838546 | 0.148476 | 0.591601 | 0.554117 | 0.660701 |
| 15676 | C2CD2     | 769.1583706 | 0.087694403 | 0.107732 | 0.814007 | 0.415641 | 0.519706 |
| 15743 | NUMA1     | 6244.473499 | 0.087692415 | 0.110836 | 0.791192 | 0.428832 | 0.533854 |
| 17894 | MLPH      | 183.8728626 | 0.087631054 | 0.382918 | 0.228851 | 0.818985 | 0.897112 |
| 16136 | DNAJB1    | 3172.881878 | 0.087620743 | 0.130625 | 0.670778 | 0.502362 | 0.610238 |
| 15692 | TNPO2     | 1823.281694 | 0.087476384 | 0.108028 | 0.809756 | 0.41808  | 0.522228 |
| 16519 | PAK4      | 1116.144341 | 0.08745916  | 0.154401 | 0.566442 | 0.571093 | 0.677644 |
| 15913 | STOML2    | 1700.463294 | 0.087310229 | 0.118274 | 0.7382   | 0.460393 | 0.567093 |
| 15386 | METTL2B   | 260.0384139 | 0.087230885 | 0.097586 | 0.893887 | 0.371382 | 0.473123 |
| 14804 | ZNF747    | 286.3090397 | 0.087193769 | 0.081967 | 1.063766 | 0.287435 | 0.380573 |
| 18128 | TEX11     | 72.25636614 | 0.086940679 | 0.487246 | 0.178433 | 0.858383 | 0.928131 |
| 18008 | DC1001246 | 5.678874937 | 0.086904354 | 0.426387 | 0.203816 | 0.838498 | 0.912672 |
| 16149 | ZNF137    | 62.0021352  | 0.086887191 | 0.13041  | 0.666262 | 0.505244 | 0.613244 |
| 16522 | MPHOSPH9  | 235.0813486 | 0.08687927  | 0.153561 | 0.565763 | 0.571555 | 0.678068 |
| 15505 | LTV1      | 413.9777909 | 0.086822748 | 0.100971 | 0.859874 | 0.389858 | 0.492848 |
| 16771 | ZNF713    | 42.43696078 | 0.086799531 | 0.174207 | 0.498256 | 0.618304 | 0.722638 |
| 15211 | C4orf14   | 509.8617369 | 0.086492454 | 0.091576 | 0.944484 | 0.344922 | 0.444461 |
| 14732 | CNOT10    | 381.0863473 | 0.086470996 | 0.079392 | 1.089166 | 0.276081 | 0.367327 |
| 15067 | ZNF473    | 217.5268646 | 0.086469921 | 0.087685 | 0.986147 | 0.324061 | 0.421578 |
| 15137 | CYB5B     | 1734.575647 | 0.08633382  | 0.089596 | 0.96359  | 0.335251 | 0.434119 |
| 15158 | KHNYN     | 1319.289301 | 0.086163501 | 0.089932 | 0.958093 | 0.338016 | 0.437092 |
| 14126 | MESDC2    | 1626.294373 | 0.085998176 | 0.067208 | 1.279575 | 0.200695 | 0.278472 |
| 15790 | KIAA0495  | 499.1618754 | 0.085977109 | 0.110385 | 0.778886 | 0.436047 | 0.541289 |
| 16796 | TMEM53    | 236.0311576 | 0.085928464 | 0.175005 | 0.491005 | 0.623423 | 0.727537 |
| 16304 | LOC147804 | 139.4026863 | 0.085805916 | 0.137034 | 0.626163 | 0.531208 | 0.638551 |
| 15934 | PTGES3    | 6022.279133 | 0.085742745 | 0.117144 | 0.731942 | 0.464204 | 0.571035 |
| 17000 | NAPRT1    | 758.4595352 | 0.085668595 | 0.194966 | 0.439403 | 0.66037  | 0.761407 |
| 16968 | ZNF37B    | 360.2177804 | 0.085533775 | 0.191364 | 0.446968 | 0.654898 | 0.756522 |
| 17888 | QRFP      | 0.879749735 | 0.085492909 | 0.372286 | 0.229643 | 0.818369 | 0.896733 |
| 17432 | SUSD3     | 164.1180056 | 0.085423834 | 0.25803  | 0.331061 | 0.740598 | 0.832748 |
| 16969 | ULK4      | 65.93611305 | 0.085365672 | 0.191303 | 0.446232 | 0.65543  | 0.757091 |
| 17576 | CCDC13    | 17.11739558 | 0.085271489 | 0.285857 | 0.298301 | 0.765474 | 0.853667 |
| 15984 | RBM5      | 1361.379936 | 0.085247282 | 0.118861 | 0.717204 | 0.473249 | 0.580339 |
| 18647 | TRIM72    | 0.709023549 | 0.085234267 | 0.955094 | 0.089242 | 0.92889  | 0.976665 |
| 15142 | ZNF584    | 176.2471904 | 0.084956359 | 0.08831  | 0.962029 | 0.336035 | 0.434995 |
| 15536 | KIAA0226  | 683.7722964 | 0.084802942 | 0.099793 | 0.849785 | 0.395445 | 0.498913 |

|       |          |             |             |          |          |          |          |
|-------|----------|-------------|-------------|----------|----------|----------|----------|
| 16583 | SPHK2    | 303.1516257 | 0.084694241 | 0.153529 | 0.551649 | 0.581189 | 0.686962 |
| 15748 | USP40    | 1042.547816 | 0.084629981 | 0.107044 | 0.790606 | 0.429174 | 0.534178 |
| 15217 | MBD4     | 832.4524741 | 0.084526914 | 0.089643 | 0.942929 | 0.345717 | 0.4453   |
| 15795 | ZNF142   | 495.7470001 | 0.084316163 | 0.108503 | 0.777089 | 0.437106 | 0.542432 |
| 17921 | FAM153B  | 32.8606708  | 0.084292938 | 0.37558  | 0.224434 | 0.82242  | 0.899517 |
| 15670 | FUNDC1   | 382.7130328 | 0.084154154 | 0.103154 | 0.815814 | 0.414607 | 0.518582 |
| 18250 | NLRP4    | 0.769980626 | 0.084024617 | 0.547806 | 0.153384 | 0.878095 | 0.943099 |
| 17689 | MEM132E  | 20.08888853 | 0.08391832  | 0.310033 | 0.270675 | 0.786641 | 0.871698 |
| 17038 | SEMA3F   | 2141.08799  | 0.083875566 | 0.194346 | 0.431578 | 0.666048 | 0.766241 |
| 17954 | AVPR2    | 26.9590366  | 0.083562518 | 0.386346 | 0.21629  | 0.828762 | 0.904806 |
| 14803 | ASTE1    | 175.2028425 | 0.083515387 | 0.078493 | 1.063992 | 0.287332 | 0.380464 |
| 17968 | KSR2     | 24.12531539 | 0.083455607 | 0.391334 | 0.213259 | 0.831125 | 0.906631 |
| 16399 | MTRR     | 1129.019667 | 0.0834473   | 0.138741 | 0.601462 | 0.547532 | 0.654441 |
| 17820 | RNF183   | 54.51735743 | 0.083363814 | 0.34419  | 0.242203 | 0.808623 | 0.88944  |
| 14645 | MMECR1   | 711.6711904 | 0.083220677 | 0.074356 | 1.119212 | 0.26305  | 0.352068 |
| 18084 | NLRP2    | 89.00868591 | 0.083212654 | 0.439833 | 0.189192 | 0.849943 | 0.921261 |
| 15788 | C17orf48 | 147.866873  | 0.083004642 | 0.106458 | 0.779697 | 0.435569 | 0.540765 |
| 15856 | TMED10   | 7502.703381 | 0.082891855 | 0.109601 | 0.756306 | 0.449466 | 0.555625 |
| 15784 | ZSWIM1   | 230.4572661 | 0.082867389 | 0.10624  | 0.779998 | 0.435392 | 0.540682 |
| 16340 | NAPA     | 2831.701893 | 0.082718264 | 0.134376 | 0.615574 | 0.538175 | 0.64558  |
| 15061 | CBX1     | 1253.122877 | 0.082702643 | 0.083758 | 0.987405 | 0.323444 | 0.420944 |
| 15311 | POLR3A   | 412.4884726 | 0.082337836 | 0.089603 | 0.918919 | 0.358138 | 0.458485 |
| 17433 | PIK3AP1  | 1620.987339 | 0.082322951 | 0.248944 | 0.330689 | 0.740879 | 0.833017 |
| 17488 | CLIP4    | 434.477039  | 0.082279469 | 0.259619 | 0.316924 | 0.751301 | 0.842048 |
| 14981 | COPS5    | 1106.350601 | 0.082273315 | 0.081364 | 1.01118  | 0.31193  | 0.408127 |
| 14935 | MED29    | 1987.523914 | 0.0821671   | 0.080177 | 1.024817 | 0.305449 | 0.400878 |
| 17112 | MLF1     | 313.8941542 | 0.082119653 | 0.200839 | 0.408884 | 0.682625 | 0.781915 |
| 15983 | ZNF333   | 192.6869842 | 0.081869037 | 0.114132 | 0.71732  | 0.473177 | 0.580288 |
| 18165 | RNASE13  | 0.808805563 | 0.081802262 | 0.477234 | 0.171409 | 0.863902 | 0.932196 |
| 16991 | DLC1     | 1440.864599 | 0.081590041 | 0.184778 | 0.441557 | 0.65881  | 0.76001  |
| 16055 | DYRK2    | 723.8719168 | 0.081583763 | 0.117104 | 0.696677 | 0.486005 | 0.593332 |
| 13804 | ZNF207   | 2593.119389 | 0.08141976  | 0.058739 | 1.386121 | 0.16571  | 0.2353   |
| 16377 | L3MBTL3  | 223.2405939 | 0.081247307 | 0.133992 | 0.606359 | 0.544276 | 0.651423 |
| 17217 | SORBS1   | 2156.711141 | 0.081230045 | 0.211028 | 0.384926 | 0.700292 | 0.79726  |
| 16770 | BTN3A3   | 966.4309684 | 0.081209893 | 0.162943 | 0.498396 | 0.618205 | 0.722566 |
| 17165 | BCAM     | 3908.072079 | 0.081165499 | 0.205507 | 0.394952 | 0.692878 | 0.791195 |
| 15826 | ACTR1B   | 1565.788766 | 0.0811293   | 0.105788 | 0.766906 | 0.443138 | 0.548805 |
| 18364 | FAM71F1  | 1.136118776 | 0.081049458 | 0.598209 | 0.135487 | 0.892227 | 0.952276 |
| 16434 | SLCO3A1  | 749.7624124 | 0.080912874 | 0.136461 | 0.592937 | 0.553223 | 0.659835 |
| 14023 | LSM14B   | 782.3491803 | 0.080873875 | 0.061605 | 1.312784 | 0.189256 | 0.264552 |
| 15971 | CALM2    | 7455.251348 | 0.080830539 | 0.111903 | 0.722327 | 0.470093 | 0.576939 |
| 17270 | SDHAP2   | 273.1147592 | 0.080777943 | 0.215864 | 0.374207 | 0.70825  | 0.803799 |
| 16109 | KIAA0913 | 1645.117329 | 0.08067497  | 0.118987 | 0.678016 | 0.497762 | 0.605663 |
| 17900 | COL6A6   | 2.019905411 | 0.080500668 | 0.353188 | 0.227926 | 0.819704 | 0.89755  |
| 16837 | CXXC5    | 987.0587021 | 0.080469254 | 0.167384 | 0.480746 | 0.630697 | 0.734245 |
| 16415 | THAP4    | 1144.427971 | 0.08026884  | 0.134015 | 0.598954 | 0.549204 | 0.655801 |
| 18445 | OR14I1   | 0.663637171 | 0.080232255 | 0.661051 | 0.121371 | 0.903397 | 0.96008  |

|       |          |             |             |          |          |          |          |
|-------|----------|-------------|-------------|----------|----------|----------|----------|
| 17202 | SPATA1   | 2.706129877 | 0.07974551  | 0.20609  | 0.386945 | 0.698797 | 0.796252 |
| 15055 | RNASEN   | 1040.333994 | 0.079694891 | 0.08061  | 0.988645 | 0.322837 | 0.42032  |
| 16433 | ZFP36L2  | 3695.720638 | 0.079692372 | 0.134143 | 0.594084 | 0.552456 | 0.65896  |
| 17097 | KIF20B   | 214.1131149 | 0.079518436 | 0.191789 | 0.414615 | 0.678424 | 0.777785 |
| 16537 | CHCHD3   | 1145.351961 | 0.079141977 | 0.140612 | 0.562838 | 0.573545 | 0.679812 |
| 15940 | LRP10    | 3639.723585 | 0.078970329 | 0.108189 | 0.729927 | 0.465435 | 0.572333 |
| 16199 | ZCCHC6   | 660.2169045 | 0.07893764  | 0.120601 | 0.654536 | 0.512766 | 0.620468 |
| 15532 | TOP3A    | 368.4589623 | 0.078840503 | 0.092651 | 0.850937 | 0.394804 | 0.498233 |
| 17139 | MYOM2    | 134.3614893 | 0.078821481 | 0.196473 | 0.401182 | 0.688286 | 0.787158 |
| 15968 | RERE     | 3275.778022 | 0.078589524 | 0.108654 | 0.723302 | 0.469495 | 0.576313 |
| 18212 | YIPF7    | 0.594352812 | 0.078496529 | 0.492559 | 0.159365 | 0.873382 | 0.939993 |
| 16043 | USP36    | 1141.366557 | 0.078321697 | 0.112097 | 0.698695 | 0.484742 | 0.592274 |
| 16895 | MYL5     | 169.0769059 | 0.07809058  | 0.167344 | 0.466648 | 0.640752 | 0.743378 |
| 17373 | PRKAR2B  | 160.1998724 | 0.078021097 | 0.224415 | 0.347665 | 0.728092 | 0.821466 |
| 14874 | FTSJD2   | 997.947776  | 0.077877564 | 0.074573 | 1.044314 | 0.29634  | 0.390518 |
| 17274 | ASAP3    | 460.2094713 | 0.077730322 | 0.208253 | 0.373249 | 0.708963 | 0.804377 |
| 17706 | CSMD2    | 33.77949903 | 0.077663661 | 0.292495 | 0.265521 | 0.790608 | 0.875174 |
| 15156 | SEC11A   | 2452.6631   | 0.077513872 | 0.080866 | 0.958548 | 0.337786 | 0.436879 |
| 17543 | CCDC141  | 28.12925574 | 0.077409978 | 0.254689 | 0.30394  | 0.761174 | 0.850469 |
| 17697 | LRRC66   | 44.98855668 | 0.077406131 | 0.28923  | 0.267628 | 0.788985 | 0.873852 |
| 17166 | WEE1     | 677.0688843 | 0.077324103 | 0.1958   | 0.394914 | 0.692906 | 0.791195 |
| 16962 | PDE7A    | 845.7485005 | 0.077223226 | 0.17185  | 0.449363 | 0.65317  | 0.754814 |
| 16073 | STK19    | 342.3890343 | 0.077135714 | 0.111583 | 0.691286 | 0.489386 | 0.596806 |
| 16361 | ACVR1B   | 1787.171049 | 0.077119758 | 0.126257 | 0.610816 | 0.541322 | 0.648521 |
| 15548 | NAP1L4   | 2449.739487 | 0.077042788 | 0.091014 | 0.84649  | 0.397279 | 0.500841 |
| 15515 | STAU1    | 3591.926884 | 0.076973034 | 0.090055 | 0.854737 | 0.392697 | 0.496116 |
| 17364 | CCRL2    | 156.3052506 | 0.076967523 | 0.220128 | 0.349649 | 0.726602 | 0.82021  |
| 16216 | TIPIN    | 77.38195616 | 0.076885123 | 0.118265 | 0.650109 | 0.515622 | 0.623255 |
| 15663 | EIF2AK4  | 1301.89414  | 0.076804597 | 0.093871 | 0.818197 | 0.413245 | 0.517143 |
| 16220 | TRAPPC2P | 169.3729095 | 0.076646807 | 0.118042 | 0.649318 | 0.516133 | 0.623741 |
| 18080 | MAL2     | 1171.98441  | 0.076578317 | 0.402187 | 0.190405 | 0.848992 | 0.920414 |
| 15769 | FAM40A   | 451.3606986 | 0.076514015 | 0.097504 | 0.784723 | 0.432616 | 0.537745 |
| 16613 | PMS2L2   | 43.88795004 | 0.076498231 | 0.140308 | 0.545218 | 0.585604 | 0.690938 |
| 15081 | RTF1     | 1345.629063 | 0.076454908 | 0.077748 | 0.983369 | 0.325426 | 0.422961 |
| 16425 | VSIG10   | 549.1748605 | 0.076446093 | 0.128056 | 0.596975 | 0.550524 | 0.656994 |
| 18134 | LRRN4CL  | 108.1470481 | 0.076226254 | 0.428506 | 0.177888 | 0.858811 | 0.928286 |
| 16657 | SMURF1   | 1118.706995 | 0.076082746 | 0.142876 | 0.53251  | 0.594373 | 0.699461 |
| 17596 | TDRD10   | 25.96894399 | 0.076038657 | 0.258198 | 0.294498 | 0.768377 | 0.855931 |
| 15987 | TNS3     | 5543.201598 | 0.076027646 | 0.106195 | 0.715928 | 0.474036 | 0.581196 |
| 16430 | ZNF700   | 342.3895821 | 0.076001815 | 0.127709 | 0.595117 | 0.551765 | 0.658256 |
| 16367 | ZNF530   | 53.94494036 | 0.075967068 | 0.124766 | 0.608874 | 0.542608 | 0.649823 |
| 16044 | DCTN4    | 2099.467731 | 0.075817814 | 0.108583 | 0.698248 | 0.485022 | 0.592516 |
| 16128 | ZNF48    | 167.3210657 | 0.075761159 | 0.112546 | 0.67316  | 0.500846 | 0.608698 |
| 17302 | PCDH1    | 1305.603106 | 0.075757112 | 0.20661  | 0.366667 | 0.713867 | 0.808722 |
| 16197 | SRPK2    | 719.5232412 | 0.075643388 | 0.115442 | 0.655251 | 0.512306 | 0.619974 |
| 17060 | NRP1     | 9084.039237 | 0.075608153 | 0.178323 | 0.423995 | 0.67157  | 0.771564 |
| 17942 | COL21A1  | 212.6250692 | 0.075086286 | 0.341807 | 0.219675 | 0.826125 | 0.902512 |

|       |           |             |             |          |          |          |          |
|-------|-----------|-------------|-------------|----------|----------|----------|----------|
| 16585 | PGK1      | 20858.326   | 0.075046898 | 0.136143 | 0.551236 | 0.581472 | 0.687213 |
| 17469 | CIB2      | 142.6194667 | 0.075038879 | 0.232836 | 0.322282 | 0.747239 | 0.838436 |
| 15094 | DCTD      | 1618.598589 | 0.074685206 | 0.076396 | 0.977607 | 0.328269 | 0.42626  |
| 16187 | 44089     | 3565.85974  | 0.074631873 | 0.113691 | 0.656445 | 0.511538 | 0.619427 |
| 17087 | PLEKHA5   | 1370.568505 | 0.074619446 | 0.179394 | 0.415954 | 0.677444 | 0.77707  |
| 16206 | LOC729678 | 493.3705738 | 0.074407508 | 0.11388  | 0.653385 | 0.513508 | 0.621083 |
| 17846 | EGR1      | 8272.216803 | 0.07432764  | 0.314754 | 0.236145 | 0.81332  | 0.893272 |
| 17436 | GRAMD2    | 37.51841131 | 0.074278055 | 0.224953 | 0.330193 | 0.741254 | 0.833273 |
| 17105 | CNTF      | 12.21504474 | 0.074246347 | 0.180354 | 0.41167  | 0.680581 | 0.779893 |
| 15064 | TEX261    | 2539.649574 | 0.074162588 | 0.075145 | 0.986924 | 0.32368  | 0.421166 |
| 17225 | RRN3P1    | 68.12589069 | 0.074102953 | 0.193619 | 0.382726 | 0.701923 | 0.798749 |
| 16974 | CCNB3     | 10.68972295 | 0.074018611 | 0.166515 | 0.444515 | 0.65667  | 0.758271 |
| 15878 | KCTD21    | 233.3936585 | 0.073899344 | 0.098634 | 0.749226 | 0.453721 | 0.560108 |
| 16174 | B4GALT4   | 685.9909546 | 0.073717994 | 0.111504 | 0.661124 | 0.508533 | 0.616244 |
| 17696 | C1orf53   | 33.48235182 | 0.07329044  | 0.273324 | 0.268145 | 0.788588 | 0.873481 |
| 16314 | DEF8      | 935.5430944 | 0.073246002 | 0.117267 | 0.624611 | 0.532227 | 0.639462 |
| 17029 | DDTL      | 386.0384178 | 0.073120068 | 0.168517 | 0.433904 | 0.664358 | 0.764656 |
| 16570 | HSPE1     | 1791.893305 | 0.072884741 | 0.13149  | 0.554298 | 0.579375 | 0.685355 |
| 16402 | ZNF19     | 89.5192323  | 0.072840012 | 0.121274 | 0.600622 | 0.548092 | 0.65499  |
| 15656 | NIF3L1    | 378.2703976 | 0.072827223 | 0.088776 | 0.820349 | 0.412017 | 0.515837 |
| 16755 | PMS2L4    | 62.77330152 | 0.072648422 | 0.144222 | 0.503726 | 0.614454 | 0.718825 |
| 17064 | PRX       | 172.7788303 | 0.072514751 | 0.171484 | 0.422865 | 0.672394 | 0.772362 |
| 16542 | LXN       | 496.7654114 | 0.072468268 | 0.128931 | 0.562071 | 0.574068 | 0.680226 |
| 16098 | PAICS     | 2229.829015 | 0.07216085  | 0.105813 | 0.681966 | 0.495261 | 0.603032 |
| 17700 | GBP1      | 2478.119062 | 0.072081858 | 0.269943 | 0.267026 | 0.789449 | 0.874213 |
| 16409 | TBPL1     | 207.9445919 | 0.071976488 | 0.120095 | 0.599332 | 0.548952 | 0.655738 |
| 18450 | RAB3B     | 6.951631634 | 0.071967054 | 0.597629 | 0.120421 | 0.90415  | 0.960555 |
| 17655 | SIM2      | 41.82959375 | 0.071763943 | 0.257777 | 0.278395 | 0.780709 | 0.866792 |
| 16454 | MGC23284  | 41.29732929 | 0.071339606 | 0.121716 | 0.586117 | 0.557797 | 0.664481 |
| 17743 | FAM19A5   | 95.98520178 | 0.071264642 | 0.277393 | 0.256908 | 0.79725  | 0.880735 |
| 18300 | TMC2      | 0.717092673 | 0.071238421 | 0.495934 | 0.143645 | 0.885781 | 0.948754 |
| 16805 | LOC652276 | 55.33844482 | 0.071211644 | 0.145658 | 0.488895 | 0.624916 | 0.72888  |
| 17184 | PDE9A     | 549.4441812 | 0.071131407 | 0.182215 | 0.39037  | 0.696263 | 0.794195 |
| 16198 | CCDC149   | 349.2014425 | 0.071104455 | 0.108636 | 0.654518 | 0.512778 | 0.620468 |
| 16189 | RBBP7     | 2089.796322 | 0.070883649 | 0.108038 | 0.6561   | 0.51176  | 0.619619 |
| 15956 | MAN2A2    | 1406.374522 | 0.070762299 | 0.097528 | 0.725558 | 0.46811  | 0.575045 |
| 16003 | TAF7      | 2998.786016 | 0.070707398 | 0.099281 | 0.712194 | 0.476345 | 0.583443 |
| 16617 | PSMA6     | 1993.980538 | 0.070250878 | 0.129028 | 0.544463 | 0.586123 | 0.691376 |
| 17116 | COX7C     | 5317.019984 | 0.070065512 | 0.172021 | 0.407307 | 0.683782 | 0.783058 |
| 16337 | C16orf91  | 171.3047423 | 0.069970561 | 0.113556 | 0.616174 | 0.537779 | 0.645184 |
| 16846 | ZNF354A   | 400.9368247 | 0.069924825 | 0.145929 | 0.47917  | 0.631818 | 0.735155 |
| 18453 | LIPN      | 0.778915304 | 0.069860889 | 0.586323 | 0.119151 | 0.905156 | 0.961468 |
| 17082 | ATP13A3   | 4895.904151 | 0.06984756  | 0.16754  | 0.416902 | 0.67675  | 0.776547 |
| 16759 | SLC44A2   | 3785.119804 | 0.069809892 | 0.139098 | 0.501875 | 0.615756 | 0.720197 |
| 18339 | CXorf58   | 0.629153519 | 0.069658718 | 0.504599 | 0.138048 | 0.890203 | 0.951429 |
| 16210 | C7orf25   | 348.5062415 | 0.069651763 | 0.106695 | 0.652813 | 0.513877 | 0.621366 |
| 18991 | KC6       | 0.743367404 | 0.069642125 | 1.341133 | 0.051928 | 0.958586 | 0.989376 |

|       |           |             |             |          |          |          |          |
|-------|-----------|-------------|-------------|----------|----------|----------|----------|
| 16379 | R3HCC1    | 660.9823613 | 0.069311505 | 0.114387 | 0.605937 | 0.544556 | 0.651693 |
| 15040 | CDKAL1    | 293.655747  | 0.069128968 | 0.069517 | 0.994422 | 0.320017 | 0.417065 |
| 18017 | HDC       | 16.2571539  | 0.069062055 | 0.340254 | 0.202972 | 0.839157 | 0.912933 |
| 16944 | LOC729795 | 21.34075295 | 0.068899598 | 0.152799 | 0.450918 | 0.652049 | 0.754234 |
| 15921 | C19orf42  | 1362.09366  | 0.06888849  | 0.093631 | 0.735742 | 0.461888 | 0.568649 |
| 16851 | TXN       | 2437.30409  | 0.068835786 | 0.144041 | 0.47789  | 0.632729 | 0.735987 |
| 16182 | CCDC53    | 666.329257  | 0.06881266  | 0.104378 | 0.659262 | 0.509727 | 0.617425 |
| 14752 | BRAP      | 584.0501992 | 0.06865344  | 0.063411 | 1.082682 | 0.27895  | 0.370641 |
| 16481 | BCORL1    | 397.3346505 | 0.068541866 | 0.118709 | 0.577396 | 0.563672 | 0.67038  |
| 15877 | PRDM2     | 744.5284974 | 0.068515609 | 0.091422 | 0.749445 | 0.453589 | 0.55998  |
| 17677 | GBP3      | 1374.813931 | 0.068487026 | 0.25011  | 0.273828 | 0.784217 | 0.869523 |
| 16215 | FOXO3B    | 709.8364859 | 0.068485445 | 0.105293 | 0.650428 | 0.515416 | 0.623045 |
| 17244 | NBEAL2    | 797.6960699 | 0.068465445 | 0.181197 | 0.377852 | 0.705541 | 0.801978 |
| 17564 | NT5C1B    | 2.113146774 | 0.068331727 | 0.228141 | 0.299515 | 0.764547 | 0.853216 |
| 17421 | NFIL3     | 1256.694011 | 0.068322255 | 0.202716 | 0.337034 | 0.736091 | 0.828203 |
| 16656 | ACSS2     | 1214.490385 | 0.068108704 | 0.127912 | 0.532464 | 0.594405 | 0.699461 |
| 16612 | PMF1      | 844.5895695 | 0.06801571  | 0.124752 | 0.545207 | 0.585611 | 0.690938 |
| 16104 | PAK2      | 3047.610132 | 0.067930347 | 0.099859 | 0.680264 | 0.496337 | 0.604118 |
| 18226 | POU4F3    | 0.610955053 | 0.067857446 | 0.432508 | 0.156893 | 0.875329 | 0.941365 |
| 15702 | CHD4      | 5003.382583 | 0.067718558 | 0.084045 | 0.805743 | 0.420391 | 0.524779 |
| 16581 | C15orf38  | 299.3936385 | 0.067694387 | 0.122652 | 0.551924 | 0.581    | 0.686822 |
| 18385 | TFAP2C    | 27.34968193 | 0.067647004 | 0.514499 | 0.131481 | 0.895395 | 0.954617 |
| 15827 | NGRN      | 2439.937005 | 0.067570448 | 0.088108 | 0.766907 | 0.443137 | 0.548805 |
| 18533 | TFAP2B    | 5.260054231 | 0.067486944 | 0.6517   | 0.103555 | 0.917522 | 0.970344 |
| 17791 | RPS6KL1   | 112.4600061 | 0.067420981 | 0.272727 | 0.247211 | 0.804745 | 0.886568 |
| 16677 | C2orf34   | 79.87471408 | 0.067368531 | 0.128032 | 0.526185 | 0.598759 | 0.703741 |
| 16569 | KIF24     | 73.23511215 | 0.067223009 | 0.121246 | 0.554434 | 0.579282 | 0.685286 |
| 16901 | GALM      | 1083.460213 | 0.067161759 | 0.144447 | 0.464957 | 0.641962 | 0.744518 |
| 15239 | TMEM127   | 2938.340693 | 0.06705139  | 0.071625 | 0.936148 | 0.349197 | 0.449151 |
| 16702 | ABL1      | 1930.186518 | 0.06699945  | 0.129313 | 0.518119 | 0.604375 | 0.709278 |
| 15910 | KDM5B     | 1191.138896 | 0.066803828 | 0.090432 | 0.738717 | 0.460079 | 0.566814 |
| 15299 | BECN1     | 1317.116785 | 0.066591806 | 0.072304 | 0.920993 | 0.357054 | 0.457456 |
| 16356 | SMARCC1   | 1508.523901 | 0.066525147 | 0.108685 | 0.61209  | 0.540478 | 0.647708 |
| 17022 | TENC1     | 3265.640571 | 0.066364478 | 0.152171 | 0.436119 | 0.66275  | 0.763241 |
| 16611 | ARID3B    | 97.96836276 | 0.066309416 | 0.121235 | 0.546949 | 0.584414 | 0.689609 |
| 16696 | VAR52     | 807.0185684 | 0.06626672  | 0.127458 | 0.51991  | 0.603126 | 0.708066 |
| 16535 | IQGAP1    | 6512.881155 | 0.066253143 | 0.117636 | 0.563203 | 0.573297 | 0.679559 |
| 16835 | ERF       | 1185.734344 | 0.066239034 | 0.137661 | 0.481177 | 0.630391 | 0.733965 |
| 16420 | ORMDL1    | 794.0988397 | 0.065754384 | 0.109899 | 0.598315 | 0.54963  | 0.656108 |
| 16878 | LOC401397 | 1074.761138 | 0.065738992 | 0.139801 | 0.470232 | 0.63819  | 0.741151 |
| 16928 | LARP6     | 386.6627352 | 0.065631747 | 0.143747 | 0.456579 | 0.647973 | 0.750291 |
| 16271 | SBDS      | 2588.014048 | 0.06560359  | 0.103384 | 0.634564 | 0.525713 | 0.633304 |
| 16676 | C3orf39   | 345.5445189 | 0.065495217 | 0.124435 | 0.526343 | 0.59865  | 0.703654 |
| 17036 | PELI1     | 1034.027517 | 0.06540687  | 0.151125 | 0.432801 | 0.665159 | 0.765372 |
| 16273 | SLC35E3   | 284.2518224 | 0.065263524 | 0.102953 | 0.633916 | 0.526136 | 0.633749 |
| 18415 | HERC2P4   | 2.226005356 | 0.06525788  | 0.518073 | 0.125963 | 0.899761 | 0.957629 |
| 17604 | ADCY4     | 305.1804092 | 0.065035408 | 0.221902 | 0.293081 | 0.76946  | 0.856747 |



|       |           |             |             |          |          |          |          |
|-------|-----------|-------------|-------------|----------|----------|----------|----------|
| 15926 | TM9SF1    | 1754.583033 | 0.065019345 | 0.088473 | 0.734905 | 0.462397 | 0.569098 |
| 18146 | FAM106A   | 5.405536201 | 0.064783908 | 0.367941 | 0.176071 | 0.860238 | 0.929333 |
| 18492 | RNF222    | 0.392283891 | 0.064755465 | 0.573057 | 0.113    | 0.910031 | 0.96463  |
| 18457 | MEP1B     | 0.33397506  | 0.064755458 | 0.549878 | 0.117763 | 0.906255 | 0.962427 |
| 18523 | LY6G6C    | 0.38492398  | 0.064755429 | 0.615306 | 0.105241 | 0.916185 | 0.969496 |
| 18505 | PRPS1L1   | 0.293585282 | 0.064755404 | 0.587079 | 0.110301 | 0.912171 | 0.966216 |
| 18549 | HPYR1     | 0.350299921 | 0.064755386 | 0.636965 | 0.101662 | 0.919025 | 0.970766 |
| 18618 | WDR87     | 0.327776486 | 0.064755323 | 0.684084 | 0.09466  | 0.924585 | 0.973402 |
| 18571 | OR2AG2    | 0.27529025  | 0.064755322 | 0.651401 | 0.099409 | 0.920813 | 0.97193  |
| 18640 | ODF3      | 0.234227347 | 0.064755202 | 0.723942 | 0.089448 | 0.928726 | 0.976607 |
| 18707 | AJC25-GN0 | 0.259376216 | 0.064755096 | 0.808509 | 0.080092 | 0.936164 | 0.980903 |
| 18693 | POU1F1    | 0.224310883 | 0.064755085 | 0.791409 | 0.081823 | 0.934788 | 0.979957 |
| 18681 | HIST1H3J  | 0.197643508 | 0.064755074 | 0.787065 | 0.082274 | 0.934429 | 0.979957 |
| 18774 | DC1001909 | 0.312850142 | 0.064755051 | 0.879966 | 0.073588 | 0.941338 | 0.982718 |
| 18781 | PATE4     | 0.229953291 | 0.064754928 | 0.899197 | 0.072014 | 0.942591 | 0.983656 |
| 18815 | ADH7      | 0.265743366 | 0.064754844 | 0.961032 | 0.067381 | 0.946279 | 0.985725 |
| 18924 | RGSL1     | 0.23985609  | 0.064754721 | 1.012001 | 0.063987 | 0.948981 | 0.986718 |
| 18847 | CYP2F1    | 0.173876449 | 0.064754363 | 1.132104 | 0.057198 | 0.954387 | 0.986718 |
| 18885 | LOC494141 | 0.15654308  | 0.064754327 | 1.131686 | 0.057219 | 0.95437  | 0.986718 |
| 18982 | CLEC1B    | 0.17558778  | 0.064754148 | 1.219496 | 0.053099 | 0.957653 | 0.988615 |
| 19172 | SLCO6A1   | 0.296204444 | 0.064754126 | 1.344077 | 0.048177 | 0.961575 | 0.989949 |
| 18983 | FAM19A4   | 0.159548724 | 0.064754112 | 1.216737 | 0.053219 | 0.957557 | 0.988615 |
| 18987 | NLRP13    | 0.154653    | 0.064754103 | 1.220008 | 0.053077 | 0.957671 | 0.988615 |
| 18984 | GOLGA6C   | 0.136643154 | 0.06475406  | 1.220254 | 0.053066 | 0.957679 | 0.988615 |
| 18988 | TRIM42    | 0.135983613 | 0.064754058 | 1.220774 | 0.053043 | 0.957697 | 0.988615 |
| 19206 | TTC9B     | 0.136512173 | 0.064753778 | 1.320567 | 0.049035 | 0.960892 | 0.989949 |
| 19077 | LOC729609 | 0.116843705 | 0.06475335  | 1.441295 | 0.044927 | 0.964165 | 0.989949 |
| 19014 | C4orf45   | 0.097357963 | 0.06475275  | 1.594222 | 0.040617 | 0.967601 | 0.989949 |
| 19180 | SNORA40   | 0.095209293 | 0.064752736 | 1.597995 | 0.040521 | 0.967678 | 0.989949 |
| 19151 | PRG1      | 0.140985157 | 0.064752471 | 1.710787 | 0.03785  | 0.969808 | 0.989949 |
| 19214 | IQCJ      | 0.099264667 | 0.064752141 | 1.750974 | 0.036981 | 0.9705   | 0.990048 |
| 19216 | LCE1E     | 0.095297079 | 0.064752108 | 1.759074 | 0.03681  | 0.970636 | 0.990054 |
| 19215 | C3orf74   | 0.094677133 | 0.064752102 | 1.760376 | 0.036783 | 0.970658 | 0.990054 |
| 19244 | ACCSL     | 0.076753486 | 0.064750962 | 1.995255 | 0.032452 | 0.974111 | 0.992182 |
| 19255 | SYNPR     | 0.114051817 | 0.064750473 | 2.14825  | 0.030141 | 0.975955 | 0.993674 |
| 19257 | CYLC2     | 0.094351994 | 0.064750108 | 2.194047 | 0.029512 | 0.976456 | 0.993693 |
| 19263 | SNORA47   | 0.080704191 | 0.064749801 | 2.226053 | 0.029087 | 0.976795 | 0.993934 |
| 19311 | GNG13     | 0.080439771 | 0.06474806  | 2.533099 | 0.025561 | 0.979608 | 0.994878 |
| 19332 | LOC151300 | 0.076818065 | 0.064747966 | 2.548604 | 0.025405 | 0.979732 | 0.994878 |
| 19418 | TPD52L3   | 0.076944883 | 0.064747956 | 2.550212 | 0.025389 | 0.979744 | 0.994878 |
| 19405 | SPINK9    | 0.06120751  | 0.06474726  | 2.630607 | 0.024613 | 0.980364 | 0.994878 |
| 19357 | OR2T33    | 0.060947769 | 0.064747249 | 2.632361 | 0.024597 | 0.980377 | 0.994878 |
| 19346 | CRNA0020  | 0.059278917 | 0.064747175 | 2.643865 | 0.02449  | 0.980462 | 0.994878 |
| 19277 | BARHL1    | 0.059131866 | 0.064747168 | 2.644898 | 0.02448  | 0.98047  | 0.994878 |
| 19359 | OR2T4     | 0.057158218 | 0.064747076 | 2.659097 | 0.024349 | 0.980574 | 0.994878 |
| 19328 | RTAP10-1  | 0.097881889 | 0.064746329 | 2.839871 | 0.022799 | 0.981811 | 0.994878 |
| 19323 | IFLTD1    | 0.076084946 | 0.064745587 | 2.91407  | 0.022218 | 0.982274 | 0.994878 |

|       |           |             |             |         |          |          |          |
|-------|-----------|-------------|-------------|---------|----------|----------|----------|
| 19299 | DNAJB8    | 0.057487762 | 0.064745342 | 2.91407 | 0.022218 | 0.982274 | 0.994878 |
| 19274 | ATOH1     | 0.058668532 | 0.064745342 | 2.91407 | 0.022218 | 0.982274 | 0.994878 |
| 19329 | KRTAP11-1 | 0.05879604  | 0.064745342 | 2.91407 | 0.022218 | 0.982274 | 0.994878 |
| 19363 | OR51A4    | 0.06029921  | 0.064745342 | 2.91407 | 0.022218 | 0.982274 | 0.994878 |
| 19378 | PPBPL2    | 0.056123375 | 0.064745342 | 2.91407 | 0.022218 | 0.982274 | 0.994878 |
| 19425 | ZG16      | 0.059110593 | 0.064745342 | 2.91407 | 0.022218 | 0.982274 | 0.994878 |
| 19356 | OR2A5     | 0.059753838 | 0.064745342 | 2.91407 | 0.022218 | 0.982274 | 0.994878 |
| 19297 | DEFB119   | 0.061482993 | 0.064745342 | 2.91407 | 0.022218 | 0.982274 | 0.994878 |
| 19421 | UBQLN3    | 0.056314946 | 0.064745342 | 2.91407 | 0.022218 | 0.982274 | 0.994878 |
| 19370 | OR7G3     | 0.039049697 | 0.064745097 | 2.91407 | 0.022218 | 0.982274 | 0.994878 |
| 19283 | C4orf35   | 0.037861806 | 0.064745097 | 2.91407 | 0.022218 | 0.982274 | 0.994878 |
| 19333 | LOC154449 | 0.040467749 | 0.064745097 | 2.91407 | 0.022218 | 0.982274 | 0.994878 |
| 19358 | OR2T34    | 0.038857302 | 0.064745097 | 2.91407 | 0.022218 | 0.982274 | 0.994878 |
| 19375 | PMCHL1    | 0.03893523  | 0.064745097 | 2.91407 | 0.022218 | 0.982274 | 0.994878 |
| 19385 | RIPPLY2   | 0.041170719 | 0.064745097 | 2.91407 | 0.022218 | 0.982274 | 0.994878 |
| 19290 | CDY2B     | 0.041852471 | 0.064745097 | 2.91407 | 0.022218 | 0.982274 | 0.994878 |
| 19334 | LOC284661 | 0.040721824 | 0.064745097 | 2.91407 | 0.022218 | 0.982274 | 0.994878 |
| 19371 | OR8B2     | 0.041214837 | 0.064745097 | 2.91407 | 0.022218 | 0.982274 | 0.994878 |
| 19348 | NKAIN3    | 0.039758009 | 0.064745097 | 2.91407 | 0.022218 | 0.982274 | 0.994878 |
| 19354 | OR10Z1    | 0.037790855 | 0.064745097 | 2.91407 | 0.022218 | 0.982274 | 0.994878 |
| 19383 | PRSS48    | 0.038560768 | 0.064745097 | 2.91407 | 0.022218 | 0.982274 | 0.994878 |
| 19294 | CLRN2     | 0.040487804 | 0.064745097 | 2.91407 | 0.022218 | 0.982274 | 0.994878 |
| 19301 | FAM47A    | 0.037885413 | 0.064745097 | 2.91407 | 0.022218 | 0.982274 | 0.994878 |
| 19302 | FAM71B    | 0.03744315  | 0.064745097 | 2.91407 | 0.022218 | 0.982274 | 0.994878 |
| 19338 | LY6G6E    | 0.038022829 | 0.064745097 | 2.91407 | 0.022218 | 0.982274 | 0.994878 |
| 19364 | OR52I1    | 0.040540779 | 0.064745097 | 2.91407 | 0.022218 | 0.982274 | 0.994878 |
| 19365 | OR52I2    | 0.040011141 | 0.064745097 | 2.91407 | 0.022218 | 0.982274 | 0.994878 |
| 19369 | OR6V1     | 0.038805087 | 0.064745097 | 2.91407 | 0.022218 | 0.982274 | 0.994878 |
| 19401 | SNORA62   | 0.038736079 | 0.064745097 | 2.91407 | 0.022218 | 0.982274 | 0.994878 |
| 19416 | TMEM88B   | 0.038469198 | 0.064745097 | 2.91407 | 0.022218 | 0.982274 | 0.994878 |
| 19417 | TMEM95    | 0.039280716 | 0.064745097 | 2.91407 | 0.022218 | 0.982274 | 0.994878 |
| 19897 | LY6G6D    | 0.019129642 | 0.064744852 | 2.91407 | 0.022218 | 0.982274 | NA       |
| 19607 | AMELY     | 0.019112282 | 0.064744852 | 2.91407 | 0.022218 | 0.982274 | NA       |
| 19745 | GALNTL5   | 0.018724626 | 0.064744852 | 2.91407 | 0.022218 | 0.982274 | NA       |
| 19942 | OR10K1    | 0.018533056 | 0.064744852 | 2.91407 | 0.022218 | 0.982274 | NA       |
| 20068 | OR6F1     | 0.018533056 | 0.064744852 | 2.91407 | 0.022218 | 0.982274 | NA       |
| 20441 | SPRR2F    | 0.020267937 | 0.064744852 | 2.91407 | 0.022218 | 0.982274 | NA       |
| 20448 | TAAR2     | 0.018724626 | 0.064744852 | 2.91407 | 0.022218 | 0.982274 | NA       |
| 20487 | TTY6B     | 0.018533056 | 0.064744852 | 2.91407 | 0.022218 | 0.982274 | NA       |
| 19657 | CLDN17    | 0.019467615 | 0.064744852 | 2.91407 | 0.022218 | 0.982274 | NA       |
| 19802 | KRTAP10-1 | 0.019467615 | 0.064744852 | 2.91407 | 0.022218 | 0.982274 | NA       |
| 19835 | KRTAP3-3  | 0.020229646 | 0.064744852 | 2.91407 | 0.022218 | 0.982274 | NA       |
| 19922 | NEUROG1   | 0.019467615 | 0.064744852 | 2.91407 | 0.022218 | 0.982274 | NA       |
| 19935 | OR10G7    | 0.020540666 | 0.064744852 | 2.91407 | 0.022218 | 0.982274 | NA       |
| 19950 | OR13C5    | 0.019467615 | 0.064744852 | 2.91407 | 0.022218 | 0.982274 | NA       |
| 19995 | OR4D5     | 0.019467615 | 0.064744852 | 2.91407 | 0.022218 | 0.982274 | NA       |
| 20010 | OR4X1     | 0.018747901 | 0.064744852 | 2.91407 | 0.022218 | 0.982274 | NA       |

|       |           |             |             |          |          |          |          |
|-------|-----------|-------------|-------------|----------|----------|----------|----------|
| 20083 | OR7G2     | 0.019467615 | 0.064744852 | 2.91407  | 0.022218 | 0.982274 | NA       |
| 20465 | TRIM48    | 0.018747901 | 0.064744852 | 2.91407  | 0.022218 | 0.982274 | NA       |
| 19361 | OR4K17    | 0.020707435 | 0.064744852 | 2.91407  | 0.022218 | 0.982274 | 0.994878 |
| 19396 | SNORA2A   | 0.021727849 | 0.064744852 | 2.91407  | 0.022218 | 0.982274 | 0.994878 |
| 19398 | SNORA36A  | 0.025077593 | 0.064744852 | 2.91407  | 0.022218 | 0.982274 | 0.994878 |
| 19641 | C5orf48   | 0.019314616 | 0.064744852 | 2.91407  | 0.022218 | 0.982274 | NA       |
| 19663 | CSHL1     | 0.018275686 | 0.064744852 | 2.91407  | 0.022218 | 0.982274 | NA       |
| 19728 | FLJ25363  | 0.018074854 | 0.064744852 | 2.91407  | 0.022218 | 0.982274 | NA       |
| 19732 | FOXR1     | 0.020150484 | 0.064744852 | 2.91407  | 0.022218 | 0.982274 | NA       |
| 19783 | IFNA16    | 0.018952867 | 0.064744852 | 2.91407  | 0.022218 | 0.982274 | NA       |
| 19808 | KRTAP10-5 | 0.020095221 | 0.064744852 | 2.91407  | 0.022218 | 0.982274 | NA       |
| 19836 | KRTAP4-12 | 0.0185229   | 0.064744852 | 2.91407  | 0.022218 | 0.982274 | NA       |
| 19878 | LOC284375 | 0.018358592 | 0.064744852 | 2.91407  | 0.022218 | 0.982274 | NA       |
| 19913 | MUC7      | 0.01955704  | 0.064744852 | 2.91407  | 0.022218 | 0.982274 | NA       |
| 19964 | OR2B3     | 0.018279723 | 0.064744852 | 2.91407  | 0.022218 | 0.982274 | NA       |
| 19966 | OR2G3     | 0.018279723 | 0.064744852 | 2.91407  | 0.022218 | 0.982274 | NA       |
| 19985 | OR4A16    | 0.018275686 | 0.064744852 | 2.91407  | 0.022218 | 0.982274 | NA       |
| 19987 | OR4B1     | 0.018358592 | 0.064744852 | 2.91407  | 0.022218 | 0.982274 | NA       |
| 20011 | OR51A2    | 0.019354002 | 0.064744852 | 2.91407  | 0.022218 | 0.982274 | NA       |
| 20014 | OR51L1    | 0.018453088 | 0.064744852 | 2.91407  | 0.022218 | 0.982274 | NA       |
| 20015 | OR51M1    | 0.0201571   | 0.064744852 | 2.91407  | 0.022218 | 0.982274 | NA       |
| 20029 | OR5AN1    | 0.0185229   | 0.064744852 | 2.91407  | 0.022218 | 0.982274 | NA       |
| 20082 | OR7G1     | 0.018817199 | 0.064744852 | 2.91407  | 0.022218 | 0.982274 | NA       |
| 20087 | OR8D1     | 0.020257652 | 0.064744852 | 2.91407  | 0.022218 | 0.982274 | NA       |
| 20102 | OR9Q2     | 0.018273809 | 0.064744852 | 2.91407  | 0.022218 | 0.982274 | NA       |
| 20118 | PRAMEF22  | 0.018279723 | 0.064744852 | 2.91407  | 0.022218 | 0.982274 | NA       |
| 20146 | RNASE8    | 0.019314616 | 0.064744852 | 2.91407  | 0.022218 | 0.982274 | NA       |
| 20197 | SNORA38   | 0.01955704  | 0.064744852 | 2.91407  | 0.022218 | 0.982274 | NA       |
| 20452 | TCP10     | 0.01960569  | 0.064744852 | 2.91407  | 0.022218 | 0.982274 | NA       |
| 20453 | TCP10L2   | 0.018434801 | 0.064744852 | 2.91407  | 0.022218 | 0.982274 | NA       |
| 20462 | TNP2      | 0.019354002 | 0.064744852 | 2.91407  | 0.022218 | 0.982274 | NA       |
| 20000 | OR4F6     | 0.019014523 | 0.064744852 | 2.91407  | 0.022218 | 0.982274 | NA       |
| 20113 | POTEH     | 0.019582082 | 0.064744852 | 2.91407  | 0.022218 | 0.982274 | NA       |
| 19789 | IGFL4     | 0.019515169 | 0.064744852 | 2.91407  | 0.022218 | 0.982274 | NA       |
| 19929 | OCM2      | 0.020068549 | 0.064744852 | 2.91407  | 0.022218 | 0.982274 | NA       |
| 19956 | OR14C36   | 0.019323599 | 0.064744852 | 2.91407  | 0.022218 | 0.982274 | NA       |
| 20447 | SYCP1     | 0.019192865 | 0.064744852 | 2.91407  | 0.022218 | 0.982274 | NA       |
| 19839 | KRTAP4-4  | 0.01906623  | 0.064744852 | 2.91407  | 0.022218 | 0.982274 | NA       |
| 19915 | CRNA0002  | 0.01906623  | 0.064744852 | 2.91407  | 0.022218 | 0.982274 | NA       |
| 20070 | OR6K3     | 0.019169338 | 0.064744852 | 2.91407  | 0.022218 | 0.982274 | NA       |
| 20140 | RBMV2FP   | 0.019225344 | 0.064744852 | 2.91407  | 0.022218 | 0.982274 | NA       |
| 17222 | GALNT10   | 936.0913212 | 0.064419259 | 0.16819  | 0.383014 | 0.70171  | 0.798595 |
| 16029 | KBTBD2    | 1295.53197  | 0.064265579 | 0.091466 | 0.702617 | 0.482295 | 0.589772 |
| 16913 | CCDC58    | 281.2028789 | 0.064193566 | 0.139205 | 0.461145 | 0.644695 | 0.747157 |
| 15623 | TINF2     | 1013.162619 | 0.064060296 | 0.077304 | 0.828683 | 0.407284 | 0.510989 |
| 16785 | APBB2     | 1711.089089 | 0.063691792 | 0.129021 | 0.493656 | 0.621549 | 0.725826 |
| 17456 | EXD3      | 190.8547842 | 0.063444061 | 0.195364 | 0.324748 | 0.745372 | 0.836868 |

|       |          |             |             |          |          |          |          |
|-------|----------|-------------|-------------|----------|----------|----------|----------|
| 16040 | ARL8A    | 1008.518554 | 0.063365019 | 0.090675 | 0.698814 | 0.484668 | 0.592255 |
| 16512 | RFX5     | 897.0067271 | 0.063224091 | 0.111223 | 0.568447 | 0.569732 | 0.676315 |
| 18057 | NANOG    | 1.214271009 | 0.063212239 | 0.325166 | 0.1944   | 0.845863 | 0.918089 |
| 16428 | BTN2A1   | 771.1685682 | 0.063191859 | 0.10596  | 0.596375 | 0.550925 | 0.657334 |
| 16603 | CARD8    | 915.3411868 | 0.06307106  | 0.115053 | 0.548192 | 0.58356  | 0.688933 |
| 17471 | BSN      | 34.69579168 | 0.062944316 | 0.195397 | 0.322136 | 0.74735  | 0.838464 |
| 16179 | PGBD3    | 86.81687685 | 0.062798346 | 0.095142 | 0.660051 | 0.509221 | 0.616926 |
| 16694 | ZNF286A  | 234.4365996 | 0.062768495 | 0.120689 | 0.520083 | 0.603006 | 0.70801  |
| 18287 | HECW1    | 38.7617158  | 0.062658383 | 0.429047 | 0.146041 | 0.883889 | 0.947401 |
| 16120 | ZNF512   | 803.3407187 | 0.062521559 | 0.092575 | 0.675359 | 0.499448 | 0.6073   |
| 14611 | SNAP29   | 901.1749064 | 0.062403237 | 0.05523  | 1.129872 | 0.25853  | 0.346824 |
| 16438 | TAOK3    | 1095.238669 | 0.062390047 | 0.105407 | 0.591896 | 0.55392  | 0.660506 |
| 14666 | CIAO1    | 2055.718689 | 0.061908042 | 0.05571  | 1.111248 | 0.266462 | 0.356124 |
| 16158 | SLC9A8   | 610.0083153 | 0.061848598 | 0.093113 | 0.664229 | 0.506544 | 0.61448  |
| 17172 | ZNF138   | 182.0073352 | 0.061670794 | 0.156719 | 0.393512 | 0.693941 | 0.7921   |
| 17066 | TDRKH    | 137.905525  | 0.061594763 | 0.145968 | 0.421974 | 0.673044 | 0.772979 |
| 17938 | ERRFI1   | 5676.099765 | 0.06149794  | 0.279183 | 0.220278 | 0.825655 | 0.902175 |
| 15931 | RTCD1    | 740.6173108 | 0.061360432 | 0.083604 | 0.733946 | 0.462982 | 0.569638 |
| 16312 | PRPF38B  | 1108.657142 | 0.061314726 | 0.098132 | 0.624821 | 0.532089 | 0.639374 |
| 18256 | CREB3L1  | 349.301657  | 0.061220818 | 0.406331 | 0.150667 | 0.880238 | 0.94507  |
| 16690 | ZCCHC7   | 400.8298069 | 0.061124173 | 0.117386 | 0.520709 | 0.602569 | 0.707667 |
| 15818 | C16orf80 | 540.0820858 | 0.060998037 | 0.07915  | 0.770667 | 0.440904 | 0.54635  |
| 17043 | WDR34    | 1039.074087 | 0.060963104 | 0.14224  | 0.428592 | 0.66822  | 0.768514 |
| 16499 | POLR1D   | 1743.184138 | 0.060955774 | 0.106327 | 0.573288 | 0.56645  | 0.672949 |
| 16169 | NOM1     | 415.9354823 | 0.060924109 | 0.091979 | 0.662368 | 0.507736 | 0.615507 |
| 15997 | DHX8     | 777.9321297 | 0.06087514  | 0.085247 | 0.714102 | 0.475164 | 0.582215 |
| 16799 | C20orf30 | 3378.641264 | 0.060801646 | 0.124079 | 0.490022 | 0.624118 | 0.728218 |
| 16335 | OXA1L    | 2531.988092 | 0.060789615 | 0.098572 | 0.616701 | 0.537432 | 0.644885 |
| 16831 | FAM22D   | 54.70230274 | 0.060737228 | 0.125707 | 0.483165 | 0.628979 | 0.732494 |
| 16276 | ARFGAP2  | 1592.295201 | 0.06066893  | 0.095759 | 0.633561 | 0.526367 | 0.633849 |
| 16824 | MAPK6    | 1178.49914  | 0.06055795  | 0.124955 | 0.484637 | 0.627934 | 0.731582 |
| 16529 | SERBP1   | 5492.547102 | 0.0603874   | 0.10693  | 0.564738 | 0.572252 | 0.678608 |
| 16592 | PHF11    | 606.214891  | 0.060345068 | 0.109777 | 0.549708 | 0.58252  | 0.688161 |
| 17899 | MYH7B    | 20.43727628 | 0.060234877 | 0.264013 | 0.228151 | 0.819529 | 0.897457 |
| 17135 | CCDC15   | 43.46090935 | 0.060026149 | 0.149244 | 0.402201 | 0.687536 | 0.786483 |
| 16480 | ARMCX6   | 223.4307844 | 0.059956957 | 0.103809 | 0.577568 | 0.563556 | 0.670282 |
| 17504 | C16orf86 | 59.48187701 | 0.05992167  | 0.190788 | 0.314075 | 0.753464 | 0.843682 |
| 17289 | PEX6     | 665.5234878 | 0.059758153 | 0.161148 | 0.370828 | 0.710765 | 0.805814 |
| 18550 | INSRR    | 8.9913831   | 0.059681104 | 0.587691 | 0.101552 | 0.919112 | 0.970766 |
| 17698 | ZNF454   | 13.34428439 | 0.059256881 | 0.221444 | 0.267593 | 0.789012 | 0.873852 |
| 17461 | FAM41C   | 11.64449204 | 0.059229083 | 0.182693 | 0.324201 | 0.745786 | 0.837222 |
| 16993 | C11orf61 | 250.9385168 | 0.05920654  | 0.134148 | 0.441353 | 0.658957 | 0.760091 |
| 16251 | NOLC1    | 1498.935152 | 0.05915617  | 0.092408 | 0.640164 | 0.522066 | 0.629685 |
| 17444 | FAM101B  | 907.7664505 | 0.059018781 | 0.179866 | 0.328126 | 0.742816 | 0.834667 |
| 17703 | DCXR     | 574.2764258 | 0.058950241 | 0.221305 | 0.266376 | 0.78995  | 0.874643 |
| 17643 | GFOD1    | 52.09484476 | 0.058934154 | 0.209206 | 0.281704 | 0.778171 | 0.864531 |
| 15595 | PPHLN1   | 899.1137667 | 0.058761287 | 0.070246 | 0.83651  | 0.402868 | 0.506323 |

|       |           |             |             |          |          |          |          |
|-------|-----------|-------------|-------------|----------|----------|----------|----------|
| 16517 | BLMH      | 963.1211945 | 0.058727025 | 0.103489 | 0.567468 | 0.570396 | 0.676898 |
| 17117 | KLF13     | 2346.278976 | 0.058697287 | 0.144255 | 0.406899 | 0.684082 | 0.783335 |
| 18107 | CPO       | 3.82158732  | 0.058563521 | 0.32246  | 0.181615 | 0.855885 | 0.926484 |
| 17388 | GLB1      | 1560.933544 | 0.058349258 | 0.169438 | 0.344369 | 0.730569 | 0.82355  |
| 18262 | FAM153A   | 100.8135528 | 0.058335455 | 0.389838 | 0.14964  | 0.881048 | 0.945545 |
| 17072 | PELI3     | 264.6443501 | 0.058302343 | 0.138586 | 0.420694 | 0.673979 | 0.77382  |
| 16052 | ZBTB7A    | 739.682442  | 0.058272112 | 0.083587 | 0.697139 | 0.485716 | 0.593105 |
| 17007 | PRPF3     | 708.3075599 | 0.058270059 | 0.133046 | 0.437968 | 0.66141  | 0.762291 |
| 17088 | SLC39A10  | 817.0483415 | 0.058259324 | 0.140038 | 0.416025 | 0.677392 | 0.77707  |
| 18703 | AQP2      | 29.27950827 | 0.058120227 | 0.72104  | 0.080606 | 0.935755 | 0.980651 |
| 16346 | SUGT1     | 635.9976773 | 0.05783973  | 0.09403  | 0.615117 | 0.538477 | 0.645705 |
| 17261 | TRAPPC6A  | 341.158479  | 0.057836167 | 0.154128 | 0.375249 | 0.707475 | 0.803475 |
| 16531 | FDXACB1   | 77.11802837 | 0.057707964 | 0.102332 | 0.563931 | 0.572801 | 0.679177 |
| 16711 | FUCA2     | 2050.018699 | 0.057658694 | 0.111616 | 0.516583 | 0.605447 | 0.710153 |
| 17315 | ADII      | 3075.033707 | 0.057603085 | 0.158512 | 0.363399 | 0.716307 | 0.810877 |
| 17084 | PMVK      | 1119.861936 | 0.057480446 | 0.138021 | 0.416461 | 0.677073 | 0.776826 |
| 16825 | C8orf38   | 139.4069628 | 0.057469992 | 0.118637 | 0.484418 | 0.628089 | 0.731676 |
| 17205 | NF2       | 1135.812413 | 0.057379392 | 0.148442 | 0.386545 | 0.699093 | 0.796467 |
| 18628 | C1orf230  | 1.108133033 | 0.056980265 | 0.620517 | 0.091827 | 0.926835 | 0.975247 |
| 17701 | TTC25     | 85.32044974 | 0.056772351 | 0.212633 | 0.266997 | 0.789472 | 0.874213 |
| 18670 | OVOL2     | 2.612048925 | 0.056627181 | 0.676927 | 0.083653 | 0.933332 | 0.979874 |
| 16632 | TP53BP2   | 889.9628573 | 0.056571331 | 0.104616 | 0.540752 | 0.588679 | 0.693764 |
| 18118 | C21orf71  | 2.295126235 | 0.056527943 | 0.313634 | 0.180235 | 0.856968 | 0.927074 |
| 16742 | OGG1      | 348.9133718 | 0.056503076 | 0.111014 | 0.508973 | 0.610771 | 0.715072 |
| 17768 | GPR44     | 6.090967662 | 0.055962668 | 0.221072 | 0.253143 | 0.800158 | 0.882705 |
| 17485 | TMEM8A    | 1612.886319 | 0.055918818 | 0.175824 | 0.318038 | 0.750456 | 0.841275 |
| 16488 | NUP98     | 2069.034148 | 0.055902305 | 0.097119 | 0.575606 | 0.564881 | 0.671533 |
| 16992 | NPHP3     | 493.3085352 | 0.055580437 | 0.125895 | 0.441483 | 0.658863 | 0.760027 |
| 17797 | TOX2      | 160.673468  | 0.05533366  | 0.224408 | 0.246576 | 0.805236 | 0.886859 |
| 18489 | PTX4      | 0.639669892 | 0.055296164 | 0.488388 | 0.113222 | 0.909855 | 0.964577 |
| 17962 | TTC18     | 90.17191838 | 0.055195229 | 0.257067 | 0.214711 | 0.829993 | 0.905728 |
| 17419 | NDUFB9    | 2581.325389 | 0.05507202  | 0.163253 | 0.337342 | 0.735859 | 0.828037 |
| 16874 | CEBPG     | 1023.047847 | 0.054934287 | 0.116392 | 0.471975 | 0.636945 | 0.739881 |
| 16349 | NR2C1     | 404.9431601 | 0.054832063 | 0.089275 | 0.614193 | 0.539088 | 0.646319 |
| 16815 | STK40     | 1283.294432 | 0.054774503 | 0.112424 | 0.487212 | 0.626108 | 0.729845 |
| 17132 | MPI       | 1360.864714 | 0.054770709 | 0.135764 | 0.403426 | 0.686635 | 0.78559  |
| 17516 | LOC442454 | 227.467901  | 0.054734912 | 0.17549  | 0.311897 | 0.755119 | 0.844991 |
| 16670 | PSMA3     | 1183.764302 | 0.05472046  | 0.103764 | 0.527356 | 0.597946 | 0.70308  |
| 18328 | CHRNA7    | 7.337230992 | 0.054712799 | 0.391488 | 0.139756 | 0.888853 | 0.950589 |
| 17810 | KIAA0895I | 541.5963912 | 0.054354456 | 0.222416 | 0.244382 | 0.806935 | 0.888082 |
| 18636 | P2RX3     | 1.373972407 | 0.054242727 | 0.600364 | 0.09035  | 0.928009 | 0.976045 |
| 16653 | EPRS      | 2765.920727 | 0.054128368 | 0.101495 | 0.533312 | 0.593818 | 0.698939 |
| 18041 | ANKRD53   | 22.73145285 | 0.054072597 | 0.27346  | 0.197735 | 0.843252 | 0.916041 |
| 17092 | FTO       | 2246.537674 | 0.054005957 | 0.129968 | 0.415533 | 0.677752 | 0.777231 |
| 16001 | RNF41     | 911.4458817 | 0.053928361 | 0.075658 | 0.712793 | 0.475974 | 0.583061 |
| 16321 | NFATC3    | 722.8610049 | 0.053865548 | 0.086593 | 0.622056 | 0.533905 | 0.641203 |
| 16240 | RBM14     | 812.3144638 | 0.05364037  | 0.083346 | 0.643589 | 0.519842 | 0.627428 |

|       |           |             |             |          |          |          |          |
|-------|-----------|-------------|-------------|----------|----------|----------|----------|
| 16418 | PUS3      | 206.642398  | 0.053625173 | 0.089603 | 0.598478 | 0.549521 | 0.656058 |
| 18111 | SLC22A20  | 2.878679698 | 0.053444179 | 0.294557 | 0.181439 | 0.856023 | 0.92649  |
| 17019 | C4orf10   | 334.9505503 | 0.053361958 | 0.122397 | 0.435973 | 0.662856 | 0.763241 |
| 16782 | SLC23A2   | 1123.544797 | 0.053355281 | 0.107576 | 0.495978 | 0.61991  | 0.724041 |
| 17106 | TBC1D17   | 861.2427228 | 0.053247941 | 0.129541 | 0.411051 | 0.681035 | 0.780368 |
| 17292 | SCAP      | 1163.075614 | 0.053219068 | 0.144261 | 0.368908 | 0.712196 | 0.807296 |
| 17694 | HCN3      | 126.0582589 | 0.053215969 | 0.197854 | 0.268966 | 0.787956 | 0.872954 |
| 16610 | RBM9      | 1916.081569 | 0.053146602 | 0.097151 | 0.547052 | 0.584343 | 0.689567 |
| 18099 | RASGRF1   | 15.15137577 | 0.053097121 | 0.288501 | 0.184045 | 0.853978 | 0.924848 |
| 17133 | PGAM5     | 317.2098402 | 0.05304797  | 0.131743 | 0.402663 | 0.687196 | 0.786186 |
| 17441 | TRIM66    | 303.031458  | 0.053043897 | 0.161285 | 0.328883 | 0.742244 | 0.834168 |
| 16371 | SEC22A    | 341.7199066 | 0.052899094 | 0.087013 | 0.607946 | 0.543223 | 0.650425 |
| 16953 | IDS       | 4778.887811 | 0.052888239 | 0.117466 | 0.450244 | 0.652534 | 0.754458 |
| 16620 | BAT5      | 776.7014194 | 0.05283959  | 0.097337 | 0.542854 | 0.587231 | 0.692558 |
| 16970 | CAPRIN2   | 355.1450716 | 0.052656103 | 0.118131 | 0.445743 | 0.655783 | 0.757455 |
| 17027 | UGP2      | 2745.200957 | 0.052586143 | 0.121098 | 0.434246 | 0.66411  | 0.764504 |
| 17538 | ROGDI     | 498.4920535 | 0.052499948 | 0.171668 | 0.305822 | 0.75974  | 0.849108 |
| 17720 | DZIP1     | 849.7164442 | 0.052435164 | 0.200033 | 0.262133 | 0.793219 | 0.877341 |
| 16255 | NFRKB     | 537.7535329 | 0.052396993 | 0.08194  | 0.639454 | 0.522528 | 0.630106 |
| 17860 | C10orf111 | 3.475599276 | 0.052394155 | 0.223004 | 0.234947 | 0.81425  | 0.893523 |
| 17276 | TACO1     | 540.4736727 | 0.052377784 | 0.14033  | 0.373247 | 0.708965 | 0.804377 |
| 17556 | C9orf37   | 141.3630857 | 0.052153811 | 0.172991 | 0.301482 | 0.763047 | 0.85193  |
| 17785 | TCP10L    | 15.28893464 | 0.05191322  | 0.208938 | 0.248462 | 0.803777 | 0.885849 |
| 17231 | PSMG1     | 365.2924553 | 0.051892538 | 0.136114 | 0.381243 | 0.703023 | 0.799718 |
| 18452 | C2CD4A    | 21.36707981 | 0.051876727 | 0.433609 | 0.119639 | 0.904769 | 0.961108 |
| 16957 | DYNC1H1   | 7265.438224 | 0.051828472 | 0.115248 | 0.449714 | 0.652917 | 0.754655 |
| 17154 | ATXN1     | 999.9685376 | 0.051619781 | 0.129972 | 0.397162 | 0.691248 | 0.789828 |
| 16144 | TAF5L     | 479.0219873 | 0.051521083 | 0.077214 | 0.66725  | 0.504612 | 0.612667 |
| 17952 | TMEM98    | 942.2361495 | 0.051449711 | 0.237437 | 0.216688 | 0.828451 | 0.90455  |
| 16151 | CCT2      | 2627.691858 | 0.051383393 | 0.077135 | 0.666146 | 0.505318 | 0.613258 |
| 16508 | RABL2B    | 340.040236  | 0.051163984 | 0.089799 | 0.56976  | 0.56884  | 0.67542  |
| 16741 | VDAC2     | 1803.730052 | 0.051155361 | 0.100458 | 0.509221 | 0.610598 | 0.714911 |
| 17890 | YPEL4     | 35.99726965 | 0.051024231 | 0.222334 | 0.229493 | 0.818486 | 0.896766 |
| 16723 | PHACTR4   | 1129.531025 | 0.050769137 | 0.098756 | 0.514085 | 0.607192 | 0.711689 |
| 16845 | CNOT8     | 1395.249409 | 0.050574889 | 0.10555  | 0.479158 | 0.631826 | 0.735155 |
| 17949 | TCN2      | 4291.993452 | 0.050391402 | 0.231628 | 0.217553 | 0.827777 | 0.903965 |
| 18002 | PLA2G6    | 312.042432  | 0.050391016 | 0.24481  | 0.205838 | 0.836918 | 0.911256 |
| 17933 | ADAMTS1   | 31.01129625 | 0.0502777   | 0.226196 | 0.222275 | 0.8241   | 0.900752 |
| 17521 | PNRC1     | 3856.286017 | 0.050270358 | 0.161851 | 0.310597 | 0.756107 | 0.845868 |
| 17784 | TBX2      | 1176.257953 | 0.05007154  | 0.201505 | 0.248488 | 0.803757 | 0.885849 |
| 17268 | NISCH     | 1333.832086 | 0.049929156 | 0.133406 | 0.374264 | 0.708208 | 0.803799 |
| 17550 | CRNA0018  | 8043.827114 | 0.049785805 | 0.164685 | 0.30231  | 0.762416 | 0.851439 |
| 16767 | WDR25     | 166.9885409 | 0.049613909 | 0.099391 | 0.499181 | 0.617652 | 0.722049 |
| 16552 | RRAGA     | 2681.929377 | 0.049388227 | 0.088384 | 0.558792 | 0.576303 | 0.682463 |
| 17529 | ATP6V0D1  | 2272.573535 | 0.04922567  | 0.159986 | 0.307687 | 0.75832  | 0.847957 |
| 16675 | HINFP     | 318.6573486 | 0.049197124 | 0.093431 | 0.526559 | 0.5985   | 0.70352  |
| 16461 | UBE2G2    | 1681.854935 | 0.04913663  | 0.08416  | 0.583846 | 0.559324 | 0.666017 |

|       |          |             |             |          |          |          |          |
|-------|----------|-------------|-------------|----------|----------|----------|----------|
| 16547 | SFRS2    | 2701.456976 | 0.048985548 | 0.087594 | 0.559232 | 0.576004 | 0.68234  |
| 17026 | SYF2     | 1221.785752 | 0.04896881  | 0.11272  | 0.43443  | 0.663977 | 0.764396 |
| 16857 | UBE2E3   | 1266.898175 | 0.048843973 | 0.102378 | 0.477097 | 0.633293 | 0.736408 |
| 17551 | NUDT16L1 | 632.7608374 | 0.048333943 | 0.159895 | 0.302286 | 0.762434 | 0.851439 |
| 17625 | FGFRL1   | 868.7027113 | 0.048139774 | 0.167369 | 0.287626 | 0.773633 | 0.860368 |
| 16860 | MYL12B   | 7109.869105 | 0.048135535 | 0.101137 | 0.475942 | 0.634115 | 0.737206 |
| 16998 | SERF1A   | 410.0979926 | 0.048125763 | 0.109431 | 0.439781 | 0.660096 | 0.76118  |
| 16269 | IPO9     | 1591.906567 | 0.047824992 | 0.075365 | 0.634577 | 0.525705 | 0.633304 |
| 18225 | GNMT     | 4.694798416 | 0.047530906 | 0.302412 | 0.157173 | 0.875109 | 0.94118  |
| 17068 | YPEL1    | 199.5444206 | 0.047443286 | 0.112466 | 0.421846 | 0.673137 | 0.773035 |
| 16648 | PEX5     | 1121.476629 | 0.047362794 | 0.088459 | 0.535422 | 0.592358 | 0.69743  |
| 17985 | BHLHE41  | 3167.089829 | 0.047272379 | 0.228068 | 0.207273 | 0.835796 | 0.910743 |
| 17917 | PCDHB13  | 107.8736602 | 0.047055184 | 0.209132 | 0.225002 | 0.821977 | 0.899234 |
| 17140 | ZNF496   | 291.6352468 | 0.047021576 | 0.117277 | 0.400945 | 0.68846  | 0.787311 |
| 16647 | CHMP7    | 931.1704995 | 0.046790579 | 0.087389 | 0.535429 | 0.592354 | 0.69743  |
| 17062 | MAPK14   | 1388.240252 | 0.04673821  | 0.110352 | 0.423536 | 0.671904 | 0.771891 |
| 17096 | TFG      | 2348.373073 | 0.046686445 | 0.112526 | 0.414894 | 0.678219 | 0.777596 |
| 16961 | MBD2     | 1513.343622 | 0.04654879  | 0.103594 | 0.449337 | 0.653189 | 0.754814 |
| 18806 | FSTL5    | 1.011291093 | 0.046541736 | 0.678034 | 0.068642 | 0.945274 | 0.985142 |
| 17621 | C17orf69 | 52.09157337 | 0.046495807 | 0.161331 | 0.288202 | 0.773192 | 0.86006  |
| 17057 | POLR3E   | 535.7592669 | 0.046484346 | 0.109195 | 0.425701 | 0.670326 | 0.770303 |
| 17208 | MRPL47   | 618.7538186 | 0.046404438 | 0.120255 | 0.385885 | 0.699582 | 0.796909 |
| 17889 | SLC25A35 | 97.46763115 | 0.046304801 | 0.20159  | 0.229698 | 0.818326 | 0.896733 |
| 18108 | FLJ13224 | 2.478290308 | 0.046248641 | 0.254739 | 0.181553 | 0.855933 | 0.926484 |
| 16964 | TRIM5    | 640.4929847 | 0.046176157 | 0.10288  | 0.448836 | 0.65355  | 0.755142 |
| 16849 | WTAP     | 1803.06684  | 0.046129845 | 0.096373 | 0.478662 | 0.632179 | 0.735435 |
| 17756 | TRIM22   | 2021.192015 | 0.046032062 | 0.180286 | 0.255329 | 0.798469 | 0.881437 |
| 16523 | RHOA     | 9252.568252 | 0.046015071 | 0.081364 | 0.565547 | 0.571701 | 0.678166 |
| 16856 | PHF23    | 716.7254811 | 0.045838735 | 0.09608  | 0.477087 | 0.6333   | 0.736408 |
| 17067 | WWOX     | 287.6446847 | 0.045832463 | 0.108616 | 0.421967 | 0.673049 | 0.772979 |
| 17935 | FLJ43663 | 187.8406506 | 0.045669486 | 0.206675 | 0.220972 | 0.825114 | 0.90176  |
| 17517 | MIOS     | 772.9622997 | 0.045374789 | 0.145451 | 0.311959 | 0.755071 | 0.844991 |
| 17278 | PCTP     | 619.4074072 | 0.045272316 | 0.121365 | 0.373025 | 0.70913  | 0.804471 |
| 16986 | VRK1     | 154.9675122 | 0.04511666  | 0.101905 | 0.442732 | 0.657959 | 0.759252 |
| 16329 | OBFC1    | 615.7131072 | 0.045108268 | 0.072827 | 0.619385 | 0.535663 | 0.642998 |
| 17258 | TRIP12   | 3190.954591 | 0.045064195 | 0.119988 | 0.375571 | 0.707236 | 0.803252 |
| 17708 | CAPN10   | 300.022954  | 0.045063579 | 0.169806 | 0.265383 | 0.790714 | 0.875193 |
| 16010 | C20orf11 | 1326.96939  | 0.044987588 | 0.063457 | 0.708946 | 0.478358 | 0.585652 |
| 17664 | ZRANB3   | 60.89970351 | 0.044976686 | 0.162637 | 0.276546 | 0.782129 | 0.867895 |
| 18174 | TPTE2P1  | 12.72425422 | 0.044949525 | 0.264723 | 0.169798 | 0.865169 | 0.93315  |
| 17151 | POLG2    | 109.2465937 | 0.044921268 | 0.112869 | 0.397994 | 0.690635 | 0.789291 |
| 16626 | RNF167   | 2010.79377  | 0.044919664 | 0.082831 | 0.542308 | 0.587607 | 0.692751 |
| 17052 | C1orf66  | 400.8977449 | 0.044856497 | 0.105093 | 0.426828 | 0.669505 | 0.769579 |
| 16885 | TDG      | 441.7803801 | 0.044610001 | 0.09518  | 0.468691 | 0.639291 | 0.742122 |
| 17760 | FBXO44   | 617.5602416 | 0.044555668 | 0.175032 | 0.254557 | 0.799066 | 0.881897 |
| 16405 | INRNPA2B | 11337.3939  | 0.044516801 | 0.074181 | 0.600112 | 0.548432 | 0.655263 |
| 16841 | CTDSP2   | 4720.675262 | 0.044470642 | 0.092703 | 0.479709 | 0.631434 | 0.734801 |

|       |           |             |             |          |          |          |          |
|-------|-----------|-------------|-------------|----------|----------|----------|----------|
| 17295 | ZNF768    | 1224.736257 | 0.044463584 | 0.120766 | 0.36818  | 0.712739 | 0.807771 |
| 16536 | VPS45     | 666.4430444 | 0.044219565 | 0.078508 | 0.563252 | 0.573263 | 0.679559 |
| 17713 | FAM13A    | 3416.951895 | 0.044136924 | 0.167307 | 0.263808 | 0.791928 | 0.876269 |
| 17008 | ATF7      | 1539.014337 | 0.044089018 | 0.100698 | 0.437833 | 0.661507 | 0.762314 |
| 18194 | PLN       | 466.335012  | 0.044045404 | 0.269364 | 0.163517 | 0.870112 | 0.9374   |
| 17297 | RFX7      | 519.5723396 | 0.043984337 | 0.119558 | 0.36789  | 0.712955 | 0.807923 |
| 17235 | YIPF3     | 2511.973956 | 0.043613642 | 0.114747 | 0.380085 | 0.703882 | 0.80051  |
| 16431 | PITPNA    | 2047.267578 | 0.043507415 | 0.073148 | 0.594786 | 0.551986 | 0.65848  |
| 18302 | DNASE1L2  | 9.042095831 | 0.043398482 | 0.302968 | 0.143244 | 0.886097 | 0.948989 |
| 18075 | TGFB2     | 239.1806211 | 0.043335472 | 0.22546  | 0.192209 | 0.847579 | 0.919213 |
| 17800 | C6orf108  | 783.7906097 | 0.043251634 | 0.175644 | 0.246246 | 0.805491 | 0.886941 |
| 16967 | RNF26     | 949.6294396 | 0.043245861 | 0.096646 | 0.447466 | 0.654539 | 0.756151 |
| 16579 | UBN1      | 1019.121251 | 0.043041269 | 0.077953 | 0.552143 | 0.58085  | 0.686727 |
| 17672 | KCTD20    | 1498.141214 | 0.043004218 | 0.156316 | 0.275111 | 0.783231 | 0.868772 |
| 17167 | TRIM24    | 534.0694115 | 0.043002568 | 0.108922 | 0.394803 | 0.692988 | 0.791243 |
| 16518 | C16orf70  | 523.6797938 | 0.042952789 | 0.075777 | 0.566834 | 0.570827 | 0.677369 |
| 17959 | JPH4      | 27.25414251 | 0.042708341 | 0.198702 | 0.214937 | 0.829817 | 0.905666 |
| 18796 | WNT7A     | 0.714965708 | 0.042628571 | 0.609532 | 0.069937 | 0.944244 | 0.984684 |
| 18091 | AKAP5     | 88.4895098  | 0.042560368 | 0.228111 | 0.186577 | 0.851992 | 0.923054 |
| 17348 | RBPMS     | 2849.388265 | 0.042552722 | 0.120284 | 0.353768 | 0.723513 | 0.817476 |
| 17223 | SDHAF1    | 208.6011834 | 0.042546596 | 0.111079 | 0.383031 | 0.701697 | 0.798595 |
| 17606 | AACS      | 619.1719725 | 0.042489999 | 0.145098 | 0.292836 | 0.769647 | 0.856859 |
| 18437 | PEG10     | 1070.650171 | 0.042457519 | 0.34838  | 0.121871 | 0.903001 | 0.960011 |
| 17156 | PCGF3     | 1061.270266 | 0.042279666 | 0.106479 | 0.39707  | 0.691316 | 0.789839 |
| 17152 | FAM134A   | 3881.495301 | 0.04221604  | 0.106136 | 0.397754 | 0.690811 | 0.789447 |
| 18459 | PDLIM4    | 241.9388895 | 0.042068338 | 0.357493 | 0.117676 | 0.906324 | 0.962435 |
| 17759 | LOC283070 | 291.5886399 | 0.042023719 | 0.164913 | 0.254824 | 0.798859 | 0.881718 |
| 17767 | C17orf79  | 777.9329453 | 0.041983422 | 0.16583  | 0.253172 | 0.800136 | 0.882705 |
| 16708 | MCM3AP    | 1693.221539 | 0.04195178  | 0.081168 | 0.516848 | 0.605262 | 0.709986 |
| 17766 | FGFR1     | 1992.471032 | 0.041707149 | 0.164674 | 0.253271 | 0.800059 | 0.882695 |
| 16659 | SENP3     | 746.7721259 | 0.041687674 | 0.078349 | 0.532076 | 0.594673 | 0.699693 |
| 16912 | ALKBH5    | 2945.194004 | 0.041532092 | 0.089885 | 0.462059 | 0.644039 | 0.746441 |
| 17003 | SEC22B    | 1664.015146 | 0.041076147 | 0.093646 | 0.438632 | 0.660928 | 0.761916 |
| 18276 | NCR1      | 3.314271168 | 0.041047421 | 0.278341 | 0.147472 | 0.88276  | 0.946759 |
| 17159 | SNAP23    | 1487.59444  | 0.040680554 | 0.102604 | 0.396482 | 0.691749 | 0.790196 |
| 18565 | IGSF9     | 11.59933589 | 0.040644291 | 0.40644  | 0.100001 | 0.920344 | 0.97165  |
| 17480 | URB1      | 699.2514957 | 0.040481938 | 0.126829 | 0.319185 | 0.749586 | 0.84054  |
| 17817 | C12orf35  | 1229.655638 | 0.040449029 | 0.166684 | 0.242669 | 0.808262 | 0.889192 |
| 18031 | LAYN      | 305.9946608 | 0.040285594 | 0.201779 | 0.199652 | 0.841752 | 0.915046 |
| 17673 | HS1BP3    | 1503.14896  | 0.040181388 | 0.146153 | 0.274927 | 0.783373 | 0.868833 |
| 16982 | DDX50     | 818.7062485 | 0.040149462 | 0.090497 | 0.443656 | 0.657291 | 0.75866  |
| 17018 | SAR1A     | 2564.162846 | 0.04002797  | 0.091718 | 0.436422 | 0.66253  | 0.76309  |
| 17014 | SUPT6H    | 2620.926593 | 0.039933413 | 0.091417 | 0.436826 | 0.662237 | 0.762931 |
| 17719 | LYST      | 681.2819004 | 0.039810766 | 0.151532 | 0.262722 | 0.792765 | 0.876968 |
| 16946 | YWHAH     | 4815.38463  | 0.039790979 | 0.088251 | 0.450886 | 0.652072 | 0.754234 |
| 17814 | MXD1      | 613.3039928 | 0.039783058 | 0.163435 | 0.243418 | 0.807681 | 0.888682 |
| 17296 | SPRYD3    | 1286.15709  | 0.039720651 | 0.107913 | 0.368081 | 0.712813 | 0.807808 |



|       |           |             |             |          |          |          |          |
|-------|-----------|-------------|-------------|----------|----------|----------|----------|
| 18088 | NEURL2    | 54.5918376  | 0.039575974 | 0.21062  | 0.187902 | 0.850954 | 0.922133 |
| 18207 | C10orf105 | 13.52788913 | 0.03945378  | 0.246334 | 0.160164 | 0.872752 | 0.939474 |
| 17252 | SCFD2     | 350.0422107 | 0.03931186  | 0.104266 | 0.377034 | 0.706149 | 0.802296 |
| 17862 | DC1001295 | 48.84493999 | 0.03925132  | 0.166993 | 0.235047 | 0.814172 | 0.893523 |
| 16716 | C4orf23   | 156.5715134 | 0.039154334 | 0.075974 | 0.515362 | 0.6063   | 0.71087  |
| 16999 | L3MBTL2   | 821.6864656 | 0.039119837 | 0.089016 | 0.439469 | 0.660321 | 0.761395 |
| 17755 | STK38L    | 787.0978642 | 0.039063056 | 0.152789 | 0.255666 | 0.798209 | 0.881199 |
| 18508 | PSORS1C3  | 29.61338087 | 0.039001726 | 0.35601  | 0.109552 | 0.912764 | 0.966677 |
| 17513 | XRCC4     | 160.2902971 | 0.038996884 | 0.124712 | 0.312696 | 0.754512 | 0.844469 |
| 17130 | TXNDC11   | 1881.772156 | 0.038839646 | 0.096183 | 0.403809 | 0.686353 | 0.785359 |
| 17658 | CCDC104   | 1293.754802 | 0.03883234  | 0.13984  | 0.277691 | 0.78125  | 0.867175 |
| 18018 | COX6C     | 2325.803185 | 0.038524465 | 0.189917 | 0.202849 | 0.839253 | 0.912987 |
| 18170 | ZNF389    | 10.009876   | 0.038436952 | 0.225137 | 0.170727 | 0.864438 | 0.932518 |
| 17366 | CABIN1    | 1343.748486 | 0.03829819  | 0.109717 | 0.349064 | 0.727041 | 0.820611 |
| 17632 | DMTF1     | 941.6962609 | 0.038293061 | 0.135022 | 0.283606 | 0.776712 | 0.863401 |
| 17393 | DCAF13    | 727.7094361 | 0.038158069 | 0.111198 | 0.343156 | 0.731481 | 0.824341 |
| 18064 | TFRC      | 2499.459654 | 0.038135943 | 0.197246 | 0.193342 | 0.846691 | 0.918733 |
| 18115 | PPAPDC3   | 92.05848292 | 0.038135739 | 0.210637 | 0.181049 | 0.856329 | 0.926611 |
| 17479 | 44081     | 4027.224245 | 0.038100385 | 0.119365 | 0.319193 | 0.749581 | 0.84054  |
| 18322 | MCF2L2    | 16.03906318 | 0.037891066 | 0.269686 | 0.140501 | 0.888264 | 0.950219 |
| 17845 | CEP290    | 612.1533624 | 0.03778607  | 0.159908 | 0.236298 | 0.813201 | 0.893223 |
| 17326 | ISG20L2   | 486.7774771 | 0.037611333 | 0.104191 | 0.360984 | 0.718111 | 0.812403 |
| 17739 | LOC723972 | 9.784168065 | 0.037459819 | 0.145357 | 0.257709 | 0.796631 | 0.880201 |
| 18500 | KRTAP5-9  | 3.94704582  | 0.037457666 | 0.334761 | 0.111894 | 0.910908 | 0.965119 |
| 17028 | KIAA0892  | 1155.544581 | 0.037206084 | 0.085712 | 0.434082 | 0.664229 | 0.764597 |
| 18327 | CRNA0009  | 5.671295407 | 0.03718762  | 0.26587  | 0.139872 | 0.888761 | 0.950577 |
| 17192 | CCDC90A   | 323.6991988 | 0.037171841 | 0.095601 | 0.388822 | 0.697408 | 0.79512  |
| 16975 | FOXJ2     | 762.2751916 | 0.036721415 | 0.08263  | 0.444408 | 0.656747 | 0.758271 |
| 18334 | THSD4     | 514.1895791 | 0.036369498 | 0.261609 | 0.139022 | 0.889432 | 0.950931 |
| 18538 | BCL8      | 2.816822786 | 0.036207121 | 0.352677 | 0.102664 | 0.91823  | 0.970735 |
| 18518 | C2CD4D    | 7.635599255 | 0.036052491 | 0.336447 | 0.107157 | 0.914665 | 0.968158 |
| 16772 | C2orf44   | 221.0557416 | 0.035988976 | 0.072296 | 0.497801 | 0.618624 | 0.72297  |
| 17385 | TMEM14C   | 2169.170289 | 0.03583104  | 0.103803 | 0.345183 | 0.729957 | 0.823001 |
| 17525 | C6orf153  | 535.9536675 | 0.035730408 | 0.115524 | 0.309291 | 0.7571   | 0.846786 |
| 17544 | LOC221710 | 342.9692549 | 0.035715312 | 0.11778  | 0.303237 | 0.76171  | 0.851019 |
| 16866 | SLC4A1AF  | 698.4771033 | 0.035688537 | 0.075152 | 0.474882 | 0.634871 | 0.737822 |
| 18443 | ENPP1     | 330.8743712 | 0.035684056 | 0.293603 | 0.121538 | 0.903265 | 0.96008  |
| 17425 | COBRA1    | 1217.208125 | 0.035608707 | 0.106609 | 0.334014 | 0.738369 | 0.830575 |
| 17812 | GSTM4     | 739.393949  | 0.03548462  | 0.145623 | 0.243675 | 0.807483 | 0.888535 |
| 16811 | ASB3      | 285.5912228 | 0.03540798  | 0.072631 | 0.487507 | 0.625899 | 0.729711 |
| 16893 | MLH1      | 558.4053983 | 0.035372797 | 0.075728 | 0.467105 | 0.640425 | 0.743087 |
| 17329 | NBAS      | 1282.928281 | 0.035301511 | 0.097992 | 0.360248 | 0.718661 | 0.812798 |
| 17476 | C18orf10  | 1026.806026 | 0.035209998 | 0.110262 | 0.31933  | 0.749476 | 0.84054  |
| 17032 | POLE3     | 1158.636137 | 0.03517112  | 0.081223 | 0.433017 | 0.665002 | 0.765307 |
| 18297 | PCDHAC2   | 63.34149613 | 0.035144976 | 0.243448 | 0.144363 | 0.885214 | 0.948301 |
| 17580 | LRSAM1    | 466.0556082 | 0.035128042 | 0.118206 | 0.297177 | 0.766332 | 0.854381 |
| 17786 | WBP5      | 1497.985224 | 0.035098299 | 0.141489 | 0.248064 | 0.804085 | 0.886139 |

|       |           |             |             |          |          |          |          |
|-------|-----------|-------------|-------------|----------|----------|----------|----------|
| 17653 | MINK1     | 1657.33337  | 0.035089514 | 0.125969 | 0.278557 | 0.780584 | 0.866722 |
| 17455 | CREB3     | 1247.112941 | 0.034947391 | 0.1075   | 0.325093 | 0.745111 | 0.836759 |
| 18591 | HIST1H2AC | 4.337029784 | 0.034620801 | 0.358467 | 0.09658  | 0.92306  | 0.972284 |
| 17101 | CCT8      | 3502.06672  | 0.034616128 | 0.083901 | 0.412581 | 0.679914 | 0.779311 |
| 17683 | NDUFB4    | 2228.011051 | 0.034609641 | 0.127309 | 0.271855 | 0.785734 | 0.87091  |
| 17219 | MEM183A   | 873.2558138 | 0.034455044 | 0.08962  | 0.384456 | 0.70064  | 0.797564 |
| 17796 | GNS       | 9959.005507 | 0.034329342 | 0.139224 | 0.246577 | 0.805236 | 0.886859 |
| 17929 | TOP3B     | 274.6544932 | 0.03424707  | 0.153603 | 0.222958 | 0.823568 | 0.900372 |
| 18386 | DC1001309 | 149.4068678 | 0.03418265  | 0.260336 | 0.131302 | 0.895537 | 0.954716 |
| 17509 | LSM3      | 615.8916055 | 0.034162202 | 0.108977 | 0.31348  | 0.753916 | 0.843995 |
| 17176 | CCDC52    | 300.0422889 | 0.033909537 | 0.086338 | 0.392752 | 0.694503 | 0.792599 |
| 18073 | ARHGAP39  | 102.5715987 | 0.033852291 | 0.176174 | 0.192152 | 0.847623 | 0.919213 |
| 17291 | C7orf44   | 707.4036221 | 0.03378524  | 0.091324 | 0.369948 | 0.711422 | 0.806464 |
| 18171 | EPOR      | 273.4604523 | 0.033749261 | 0.198448 | 0.170066 | 0.864958 | 0.933028 |
| 18284 | GLB1L2    | 792.2315951 | 0.033737806 | 0.230424 | 0.146416 | 0.883593 | 0.947238 |
| 18243 | C17orf28  | 255.6176495 | 0.033708427 | 0.217322 | 0.155109 | 0.876736 | 0.942    |
| 17514 | NUPL2     | 442.4534121 | 0.033614777 | 0.10767  | 0.312203 | 0.754886 | 0.84484  |
| 17769 | LOC151162 | 1441.794066 | 0.033578246 | 0.132863 | 0.252729 | 0.800478 | 0.883008 |
| 17841 | UBAC1     | 700.083209  | 0.033420883 | 0.141036 | 0.236968 | 0.812682 | 0.89287  |
| 17323 | CCDC115   | 1070.02992  | 0.033419054 | 0.092417 | 0.361613 | 0.717641 | 0.812012 |
| 17804 | NUDT2     | 256.0637202 | 0.033344798 | 0.135657 | 0.245802 | 0.805836 | 0.887171 |
| 17381 | GART      | 929.5598551 | 0.03325633  | 0.096168 | 0.345815 | 0.729482 | 0.822687 |
| 18499 | ZNF404    | 58.03870634 | 0.033034267 | 0.294932 | 0.112007 | 0.910818 | 0.965076 |
| 18214 | MID1      | 973.8568634 | 0.032748319 | 0.205759 | 0.159159 | 0.873544 | 0.940064 |
| 17098 | MAPRE1    | 2828.771307 | 0.032734672 | 0.079007 | 0.414324 | 0.678637 | 0.777984 |
| 16907 | CASC3     | 1836.74388  | 0.032655313 | 0.07044  | 0.463588 | 0.642943 | 0.745347 |
| 17727 | ZNF217    | 1428.871372 | 0.032614169 | 0.124925 | 0.26107  | 0.794039 | 0.87798  |
| 17309 | EDC3      | 591.9667042 | 0.032568871 | 0.089201 | 0.365118 | 0.715024 | 0.809705 |
| 17245 | C2orf49   | 118.6921314 | 0.032529377 | 0.086136 | 0.377651 | 0.70569  | 0.802101 |
| 18650 | ABCC11    | 3.58978294  | 0.032443696 | 0.366994 | 0.088404 | 0.929556 | 0.976956 |
| 17555 | C12orf11  | 658.1726054 | 0.03244339  | 0.107538 | 0.301692 | 0.762887 | 0.851799 |
| 18383 | ZSCAN5B   | 1.915606971 | 0.032354027 | 0.245526 | 0.131775 | 0.895163 | 0.954473 |
| 17642 | EIF3L     | 6595.252817 | 0.03233298  | 0.11474  | 0.281795 | 0.778101 | 0.864503 |
| 18303 | ATP6V0E2  | 914.43198   | 0.032305611 | 0.225701 | 0.143134 | 0.886184 | 0.94903  |
| 17646 | ASNA1     | 1573.033554 | 0.032295113 | 0.115147 | 0.280469 | 0.779117 | 0.865436 |
| 17865 | GNG10     | 723.1879966 | 0.032242176 | 0.137561 | 0.234385 | 0.814686 | 0.893794 |
| 17443 | LSM1      | 460.6274347 | 0.032175603 | 0.097939 | 0.328527 | 0.742513 | 0.834381 |
| 17063 | C2orf42   | 206.1745783 | 0.032165377 | 0.075983 | 0.423322 | 0.67206  | 0.772024 |
| 18425 | NHLH1     | 5.309911493 | 0.032066436 | 0.257404 | 0.124576 | 0.900859 | 0.958357 |
| 17009 | FAF1      | 859.6190897 | 0.031994858 | 0.073072 | 0.437851 | 0.661494 | 0.762314 |
| 17234 | VCP       | 5975.671981 | 0.031623364 | 0.083154 | 0.380297 | 0.703725 | 0.800378 |
| 18836 | C4orf50   | 1.59263395  | 0.031609981 | 0.52565  | 0.060135 | 0.952048 | 0.986718 |
| 17907 | HEMK1     | 338.5739006 | 0.031554681 | 0.139292 | 0.226537 | 0.820784 | 0.89843  |
| 17282 | CRTC3     | 1271.467169 | 0.031554409 | 0.084797 | 0.372118 | 0.709805 | 0.805083 |
| 17506 | TARS      | 1722.412859 | 0.031376861 | 0.09993  | 0.31399  | 0.753529 | 0.843706 |
| 17919 | POT1      | 736.6338605 | 0.031321482 | 0.139397 | 0.224692 | 0.822219 | 0.899398 |
| 17168 | NSUN2     | 1195.412237 | 0.031124749 | 0.078911 | 0.39443  | 0.693264 | 0.791505 |

|       |           |             |             |          |          |          |          |
|-------|-----------|-------------|-------------|----------|----------|----------|----------|
| 18000 | EEF2K     | 982.2375357 | 0.03108285  | 0.150962 | 0.205898 | 0.836871 | 0.911256 |
| 18426 | LY6G5B    | 46.0401136  | 0.030988993 | 0.249068 | 0.12442  | 0.900983 | 0.958437 |
| 17494 | AGK       | 637.8984984 | 0.030892747 | 0.09772  | 0.316136 | 0.7519   | 0.842459 |
| 17721 | PPPDE1    | 1063.132804 | 0.030560966 | 0.116547 | 0.26222  | 0.793152 | 0.877341 |
| 17883 | XPO5      | 941.8860705 | 0.030461532 | 0.132245 | 0.230341 | 0.817827 | 0.896441 |
| 18095 | BCAT2     | 712.5895915 | 0.030378351 | 0.164088 | 0.185135 | 0.853123 | 0.924127 |
| 18333 | KLRD1     | 66.29263869 | 0.030375279 | 0.218553 | 0.138984 | 0.889463 | 0.950931 |
| 17805 | PDE4A     | 685.5726687 | 0.030317147 | 0.123502 | 0.245479 | 0.806086 | 0.887396 |
| 18268 | NR1D1     | 820.6058983 | 0.030284247 | 0.203036 | 0.149157 | 0.88143  | 0.945747 |
| 17801 | TFIP11    | 961.5854027 | 0.030115356 | 0.122297 | 0.246248 | 0.80549  | 0.886941 |
| 17680 | JARID2    | 381.2804622 | 0.029872827 | 0.109277 | 0.273369 | 0.78457  | 0.869816 |
| 18376 | FIGN      | 128.3989321 | 0.029285157 | 0.220222 | 0.13298  | 0.894209 | 0.953769 |
| 17994 | ZNF792    | 121.5214847 | 0.028804252 | 0.139384 | 0.206654 | 0.83628  | 0.910966 |
| 17744 | GNPTAB    | 1608.164148 | 0.028717598 | 0.111813 | 0.256837 | 0.797305 | 0.880747 |
| 18414 | HAAO      | 765.9530199 | 0.028535949 | 0.226496 | 0.125989 | 0.899741 | 0.957629 |
| 17970 | TPP1      | 10053.11502 | 0.028463162 | 0.13352  | 0.213176 | 0.83119  | 0.906631 |
| 17926 | BLOC1S2   | 812.1630891 | 0.028346016 | 0.127066 | 0.22308  | 0.823473 | 0.900318 |
| 18188 | FLI1      | 865.0145372 | 0.028328096 | 0.17147  | 0.165207 | 0.868781 | 0.936313 |
| 17904 | KIAA0556  | 475.0805991 | 0.028258644 | 0.124108 | 0.227695 | 0.819884 | 0.897595 |
| 17300 | ZNF740    | 658.8526064 | 0.028166914 | 0.076778 | 0.366863 | 0.713721 | 0.808651 |
| 18985 | LGALS4    | 175.2078998 | 0.027961891 | 0.52394  | 0.053369 | 0.957438 | 0.988615 |
| 17086 | COPS3     | 895.6804196 | 0.027954669 | 0.067205 | 0.415962 | 0.677437 | 0.77707  |
| 17599 | GLG1      | 6726.230594 | 0.027818556 | 0.094735 | 0.293646 | 0.769029 | 0.856511 |
| 17619 | NOL6      | 845.5732641 | 0.027651457 | 0.095478 | 0.28961  | 0.772115 | 0.858972 |
| 18338 | C6orf204  | 55.00742344 | 0.027420377 | 0.198403 | 0.138206 | 0.890078 | 0.951381 |
| 17771 | CBX5      | 3668.336107 | 0.027413775 | 0.108561 | 0.25252  | 0.800639 | 0.883086 |
| 18139 | C1orf89   | 72.24237805 | 0.027300333 | 0.154726 | 0.176443 | 0.859946 | 0.929206 |
| 17863 | GMNN      | 224.5375801 | 0.027198254 | 0.115833 | 0.234805 | 0.81436  | 0.893544 |
| 18438 | RAB15     | 361.9614608 | 0.026986748 | 0.221597 | 0.121783 | 0.903071 | 0.960033 |
| 18374 | TNFRSF10A | 118.7987022 | 0.026955871 | 0.202191 | 0.133319 | 0.893941 | 0.953638 |
| 18716 | EPHA7     | 911.487844  | 0.026898172 | 0.35078  | 0.076681 | 0.938877 | 0.981752 |
| 18179 | SDCBP     | 5086.93383  | 0.026799413 | 0.159682 | 0.167829 | 0.866717 | 0.934514 |
| 17678 | PBX2      | 1366.49299  | 0.026688225 | 0.097446 | 0.273876 | 0.78418  | 0.869523 |
| 18398 | C8orf39   | 8.019955445 | 0.026507214 | 0.205887 | 0.128746 | 0.897558 | 0.956248 |
| 17636 | C1orf83   | 137.1204411 | 0.026371515 | 0.093385 | 0.282396 | 0.77764  | 0.864174 |
| 18695 | SLCO4A1   | 568.6382187 | 0.026283128 | 0.31881  | 0.082441 | 0.934296 | 0.979957 |
| 18106 | RPL23AP5  | 181.7251696 | 0.026192231 | 0.143902 | 0.182015 | 0.855571 | 0.926215 |
| 17415 | SFRS7     | 1461.094184 | 0.026073456 | 0.077146 | 0.337975 | 0.735382 | 0.82769  |
| 17773 | HSPA14    | 451.0338056 | 0.026054054 | 0.103406 | 0.251958 | 0.801074 | 0.883466 |
| 17795 | ASB6      | 628.6776736 | 0.025966493 | 0.10514  | 0.246971 | 0.80493  | 0.886622 |
| 18172 | TAF1D     | 777.9344684 | 0.025895062 | 0.152382 | 0.169935 | 0.865061 | 0.933088 |
| 18536 | HIST2H2BI | 62.34476591 | 0.025883933 | 0.250831 | 0.103193 | 0.91781  | 0.970543 |
| 18347 | ITPRIP    | 1928.202099 | 0.025697513 | 0.18751  | 0.137046 | 0.890994 | 0.952033 |
| 18839 | CHD5      | 4.122651688 | 0.025693186 | 0.417323 | 0.061567 | 0.950908 | 0.986718 |
| 19219 | CLLU1OS   | 1.31429194  | 0.025510181 | 0.699831 | 0.036452 | 0.970922 | 0.990194 |
| 18040 | AEN       | 816.9455667 | 0.025500103 | 0.128927 | 0.197787 | 0.843211 | 0.916041 |
| 18332 | AFG3L1    | 231.9472217 | 0.025467167 | 0.182966 | 0.13919  | 0.8893   | 0.95086  |

|       |           |             |             |          |          |          |          |
|-------|-----------|-------------|-------------|----------|----------|----------|----------|
| 17428 | DNAJC8    | 1843.731789 | 0.025441224 | 0.07654  | 0.332393 | 0.739592 | 0.831808 |
| 18151 | LOC649330 | 9.55091171  | 0.025181586 | 0.144217 | 0.174609 | 0.861387 | 0.930199 |
| 17714 | CRNA0009  | 644.7262873 | 0.025145285 | 0.095329 | 0.263773 | 0.791955 | 0.876269 |
| 18026 | C11orf74  | 237.9061617 | 0.025120793 | 0.125298 | 0.200489 | 0.841098 | 0.914466 |
| 18038 | C6orf134  | 148.2881858 | 0.024987358 | 0.12569  | 0.198801 | 0.842419 | 0.91541  |
| 18049 | BAT4      | 453.1681396 | 0.024815691 | 0.126052 | 0.196869 | 0.84393  | 0.916498 |
| 17958 | BTF3L4    | 898.2825861 | 0.024741572 | 0.114906 | 0.21532  | 0.829518 | 0.905411 |
| 17877 | MTF2      | 470.8565955 | 0.024678946 | 0.106816 | 0.231041 | 0.817283 | 0.896099 |
| 17873 | AP2A2     | 2103.356539 | 0.024540448 | 0.105699 | 0.232173 | 0.816403 | 0.895335 |
| 18319 | STBD1     | 867.9301164 | 0.024518547 | 0.174155 | 0.140785 | 0.888039 | 0.950134 |
| 17777 | CDAN1     | 237.9129148 | 0.024495895 | 0.097941 | 0.25011  | 0.802503 | 0.884806 |
| 18065 | C20orf29  | 251.5132056 | 0.024209157 | 0.125274 | 0.19325  | 0.846763 | 0.918755 |
| 18986 | DC1002407 | 1.93615423  | 0.024188256 | 0.454233 | 0.053251 | 0.957532 | 0.988615 |
| 18558 | RPS15AP10 | 4.042969375 | 0.023911674 | 0.233775 | 0.102285 | 0.91853  | 0.970766 |
| 18278 | UQCRB     | 4520.661407 | 0.023583834 | 0.160074 | 0.147331 | 0.882871 | 0.946791 |
| 18069 | ZNF630    | 80.04308059 | 0.023566675 | 0.122233 | 0.192802 | 0.847114 | 0.918938 |
| 18154 | PPRC1     | 756.8441254 | 0.023323887 | 0.134498 | 0.173414 | 0.862326 | 0.931059 |
| 18782 | PRINS     | 4.418993226 | 0.02330578  | 0.323712 | 0.071996 | 0.942605 | 0.983656 |
| 18547 | FCRLB     | 51.59983617 | 0.023253277 | 0.228229 | 0.101886 | 0.918847 | 0.970766 |
| 18066 | CMAS      | 890.2196719 | 0.023160596 | 0.119881 | 0.193196 | 0.846805 | 0.918755 |
| 18994 | RCOR2     | 15.24651783 | 0.023124143 | 0.451273 | 0.051242 | 0.959133 | 0.989784 |
| 18455 | SPRY4     | 2135.17505  | 0.022686295 | 0.191483 | 0.118477 | 0.90569  | 0.96193  |
| 17615 | HERPUD2   | 843.7244557 | 0.022616598 | 0.077949 | 0.290146 | 0.771705 | 0.858687 |
| 18337 | ATPIF1    | 1942.817449 | 0.022567237 | 0.163243 | 0.138243 | 0.890048 | 0.951381 |
| 17679 | PRPS1     | 922.4194435 | 0.022539268 | 0.082416 | 0.273481 | 0.784483 | 0.869769 |
| 17341 | SUPT7L    | 1124.268349 | 0.022490308 | 0.062906 | 0.357523 | 0.7207   | 0.814627 |
| 18098 | PGM3      | 417.4885147 | 0.022485467 | 0.122113 | 0.184137 | 0.853906 | 0.924821 |
| 18265 | ZFAND2B   | 667.2538154 | 0.022482435 | 0.150385 | 0.1495   | 0.881159 | 0.945612 |
| 17957 | EXOSC2    | 396.7521589 | 0.022427561 | 0.104018 | 0.215613 | 0.82929  | 0.905213 |
| 17850 | GTF2H1    | 773.7723121 | 0.022363681 | 0.094883 | 0.235697 | 0.813668 | 0.893435 |
| 19035 | FAM166A   | 0.946229719 | 0.022173071 | 0.562642 | 0.039409 | 0.968564 | 0.989949 |
| 17839 | ZMYM4     | 1292.192283 | 0.022121749 | 0.093115 | 0.237574 | 0.812211 | 0.892435 |
| 17969 | MOBK2C    | 522.1265427 | 0.022029047 | 0.103313 | 0.213227 | 0.83115  | 0.906631 |
| 18348 | KLHDC10   | 1160.48492  | 0.021988541 | 0.161178 | 0.136424 | 0.891486 | 0.952033 |
| 17912 | C22orf28  | 1732.006262 | 0.021898809 | 0.096912 | 0.225967 | 0.821227 | 0.898664 |
| 18926 | RNF212    | 90.91892742 | 0.021539612 | 0.375968 | 0.057291 | 0.954313 | 0.986718 |
| 18686 | MYOZ1     | 18.75415929 | 0.021482623 | 0.259685 | 0.082726 | 0.93407  | 0.979957 |
| 17519 | NFYC      | 969.4582601 | 0.021479866 | 0.069001 | 0.311299 | 0.755574 | 0.845368 |
| 17666 | TOR1A     | 832.0142807 | 0.021301736 | 0.077088 | 0.276331 | 0.782294 | 0.867981 |
| 18857 | FOXD1     | 84.20804847 | 0.021256681 | 0.331054 | 0.064209 | 0.948804 | 0.986718 |
| 18349 | LUC7L3    | 2034.357745 | 0.021093626 | 0.154615 | 0.136426 | 0.891484 | 0.952033 |
| 17847 | MED31     | 123.0304299 | 0.021081003 | 0.089302 | 0.236064 | 0.813383 | 0.893272 |
| 18405 | IFIT3     | 1305.119583 | 0.021000483 | 0.165226 | 0.127101 | 0.89886  | 0.95727  |
| 18569 | KCTD12    | 3725.8869   | 0.020923167 | 0.209864 | 0.099699 | 0.920584 | 0.971781 |
| 18665 | LOC389705 | 3.551447135 | 0.020904757 | 0.24642  | 0.084834 | 0.932393 | 0.97915  |
| 18954 | TSPAN11   | 144.2538504 | 0.020499197 | 0.31235  | 0.065629 | 0.947673 | 0.986718 |
| 18218 | CCDC6     | 1691.392061 | 0.020083092 | 0.126918 | 0.158237 | 0.87427  | 0.940588 |

|       |           |             |             |          |          |          |          |
|-------|-----------|-------------|-------------|----------|----------|----------|----------|
| 17838 | BUD13     | 336.1119415 | 0.020077381 | 0.084488 | 0.237635 | 0.812164 | 0.892434 |
| 18434 | ZDHC14    | 191.9690557 | 0.020052999 | 0.162802 | 0.123174 | 0.901969 | 0.95907  |
| 18281 | C14orf4   | 759.7403265 | 0.020029978 | 0.136443 | 0.146801 | 0.883289 | 0.947068 |
| 18798 | AMY2B     | 313.7897235 | 0.019962755 | 0.291098 | 0.068577 | 0.945326 | 0.985142 |
| 18217 | C8orf44   | 34.09598177 | 0.019817578 | 0.125144 | 0.158358 | 0.874175 | 0.940588 |
| 18304 | NDUFS3    | 1500.982933 | 0.019758981 | 0.138479 | 0.142686 | 0.886538 | 0.949305 |
| 18054 | SRCAP     | 2891.547269 | 0.019634996 | 0.100761 | 0.194866 | 0.845498 | 0.917943 |
| 18617 | RCAN3     | 73.62986662 | 0.019560296 | 0.205855 | 0.09502  | 0.924299 | 0.973153 |
| 18010 | ELMO2     | 913.3001512 | 0.019531457 | 0.095967 | 0.203523 | 0.838726 | 0.912703 |
| 18255 | ANKRD10   | 1611.372088 | 0.019418087 | 0.128688 | 0.150893 | 0.88006  | 0.94495  |
| 18957 | VWA2      | 4.282080126 | 0.01937378  | 0.332038 | 0.058348 | 0.953471 | 0.986718 |
| 18252 | TGFBR1    | 2373.592426 | 0.019328132 | 0.12665  | 0.15261  | 0.878706 | 0.943673 |
| 18509 | TEX264    | 1339.713718 | 0.01927505  | 0.176792 | 0.109027 | 0.913181 | 0.967058 |
| 18249 | SERINC3   | 2674.879424 | 0.019260452 | 0.125339 | 0.153667 | 0.877872 | 0.942911 |
| 18980 | IGSF1     | 28.22761768 | 0.019096967 | 0.3536   | 0.054007 | 0.956929 | 0.988239 |
| 18384 | NDUFA12   | 1049.906994 | 0.018699645 | 0.141991 | 0.131696 | 0.895225 | 0.954487 |
| 18478 | FRS3      | 98.37825836 | 0.018549678 | 0.160876 | 0.115304 | 0.908204 | 0.9634   |
| 18760 | LOC441869 | 51.82815972 | 0.018496062 | 0.246517 | 0.07503  | 0.940191 | 0.982315 |
| 17826 | GNPAT     | 1270.61276  | 0.018349664 | 0.076326 | 0.240412 | 0.810011 | 0.890617 |
| 18161 | LRRC42    | 492.6540468 | 0.018259955 | 0.105877 | 0.172464 | 0.863073 | 0.931506 |
| 18960 | YJEFN3    | 68.88985325 | 0.018174391 | 0.305659 | 0.05946  | 0.952586 | 0.986718 |
| 18006 | BAT3      | 3633.545286 | 0.018012468 | 0.088014 | 0.204654 | 0.837842 | 0.912009 |
| 18358 | ZNF512B   | 612.1697511 | 0.017820262 | 0.130179 | 0.136891 | 0.891117 | 0.952033 |
| 18201 | CDK5RAP2  | 953.3548072 | 0.017678893 | 0.109704 | 0.161152 | 0.871974 | 0.938942 |
| 18526 | TRIM56    | 459.1665584 | 0.017459135 | 0.166831 | 0.104652 | 0.916652 | 0.969842 |
| 19025 | DBC1      | 76.3426666  | 0.017307428 | 0.39519  | 0.043795 | 0.965068 | 0.989949 |
| 17851 | SLC35E1   | 1949.534551 | 0.017091792 | 0.072528 | 0.235659 | 0.813697 | 0.893435 |
| 18340 | GTF3C5    | 839.888944  | 0.017043308 | 0.12348  | 0.138025 | 0.890221 | 0.951429 |
| 18016 | LRRFIP2   | 858.4740033 | 0.016832533 | 0.082869 | 0.203123 | 0.839039 | 0.912885 |
| 18159 | SMG6      | 1061.510292 | 0.016830043 | 0.097433 | 0.172735 | 0.86286  | 0.931379 |
| 18020 | CCNH      | 636.2605081 | 0.016819634 | 0.083235 | 0.202074 | 0.839859 | 0.913545 |
| 18253 | MUS81     | 533.3387751 | 0.016790483 | 0.110463 | 0.152001 | 0.879186 | 0.944115 |
| 18484 | KLHL36    | 373.704694  | 0.016339427 | 0.143753 | 0.113664 | 0.909505 | 0.964465 |
| 19254 | SULT1E1   | 5.198161622 | 0.016210934 | 0.540639 | 0.029985 | 0.976079 | 0.993674 |
| 18203 | URGCP     | 1138.268707 | 0.016208675 | 0.100568 | 0.161172 | 0.871958 | 0.938942 |
| 18776 | TMEM26    | 157.0131327 | 0.016149815 | 0.219686 | 0.073513 | 0.941398 | 0.982718 |
| 18357 | ZNF319    | 320.4447101 | 0.016147354 | 0.118124 | 0.136699 | 0.891269 | 0.952033 |
| 18701 | ZNF320    | 1210.054725 | 0.016006395 | 0.194882 | 0.082134 | 0.93454  | 0.979957 |
| 18634 | SH3BP5    | 1725.540218 | 0.015999161 | 0.17675  | 0.090519 | 0.927875 | 0.976027 |
| 19211 | WEE2      | 1.091904041 | 0.01595894  | 0.328495 | 0.048582 | 0.961252 | 0.989949 |
| 18654 | TRPM4     | 536.0278534 | 0.015918269 | 0.180399 | 0.088239 | 0.929686 | 0.977032 |
| 19051 | HIST1H4E  | 3.681601502 | 0.01583235  | 0.36973  | 0.042821 | 0.965844 | 0.989949 |
| 19044 | GLDN      | 56.20273372 | 0.01570531  | 0.320297 | 0.049034 | 0.960893 | 0.989949 |
| 19393 | SNAP91    | 1.044761763 | 0.01569653  | 0.80361  | 0.019533 | 0.984416 | 0.994878 |
| 18974 | LIPG      | 118.7302088 | 0.015270784 | 0.27649  | 0.055231 | 0.955955 | 0.987593 |
| 18652 | ID2       | 3208.920785 | 0.015270352 | 0.173406 | 0.088061 | 0.929828 | 0.977032 |
| 18758 | BMS1P5    | 106.3822181 | 0.015267113 | 0.203531 | 0.075011 | 0.940206 | 0.982315 |

|       |           |             |             |          |          |          |          |
|-------|-----------|-------------|-------------|----------|----------|----------|----------|
| 18280 | S100PBP   | 473.4911471 | 0.015239014 | 0.103702 | 0.14695  | 0.883171 | 0.946994 |
| 18371 | CCDC71    | 279.8975612 | 0.014896956 | 0.111164 | 0.134008 | 0.893396 | 0.953212 |
| 18517 | TCP11L1   | 354.6099245 | 0.014803393 | 0.137948 | 0.107311 | 0.914542 | 0.96808  |
| 19194 | SYN2      | 9.305878278 | 0.0147723   | 0.397476 | 0.037165 | 0.970353 | 0.989949 |
| 18024 | SMARCE1   | 2514.992852 | 0.014739106 | 0.073203 | 0.201347 | 0.840427 | 0.91396  |
| 18164 | FAF2      | 1834.257648 | 0.014713659 | 0.085839 | 0.17141  | 0.863902 | 0.932196 |
| 18646 | MAP2K6    | 88.20875706 | 0.014590355 | 0.164048 | 0.08894  | 0.92913  | 0.976665 |
| 18373 | HCFC1     | 1421.584675 | 0.014560103 | 0.109001 | 0.133578 | 0.893736 | 0.953471 |
| 18562 | C9orf91   | 431.3819758 | 0.014476224 | 0.143571 | 0.10083  | 0.919685 | 0.971164 |
| 17982 | ILF3      | 4168.247564 | 0.014277172 | 0.068679 | 0.207883 | 0.83532  | 0.910528 |
| 17960 | KDM2A     | 2586.041957 | 0.014168098 | 0.065928 | 0.214903 | 0.829843 | 0.905666 |
| 18308 | TTC31     | 587.8533889 | 0.013998541 | 0.098288 | 0.142424 | 0.886745 | 0.94932  |
| 18019 | DDX42     | 2334.758739 | 0.013762888 | 0.067953 | 0.202534 | 0.839499 | 0.913204 |
| 18572 | TNPO3     | 986.9473132 | 0.013743271 | 0.138575 | 0.099176 | 0.920999 | 0.972028 |
| 19156 | PXT1      | 1.488106984 | 0.013629745 | 0.31324  | 0.043512 | 0.965293 | 0.989949 |
| 18532 | HTR7P1    | 91.91793724 | 0.013417661 | 0.129438 | 0.103661 | 0.917438 | 0.970344 |
| 18406 | SIP1      | 89.2353347  | 0.013332857 | 0.105065 | 0.126901 | 0.899018 | 0.957387 |
| 18663 | ZNF519    | 30.21586122 | 0.013253432 | 0.15543  | 0.085269 | 0.932047 | 0.978892 |
| 18967 | OC1001300 | 39.28458513 | 0.013246455 | 0.237009 | 0.05589  | 0.955429 | 0.987366 |
| 19420 | TYR       | 0.464149262 | 0.013242769 | 0.557587 | 0.02375  | 0.981052 | 0.994878 |
| 18722 | OC1001339 | 12.57766915 | 0.01314958  | 0.169472 | 0.077591 | 0.938153 | 0.981752 |
| 18204 | ALG9      | 702.5125054 | 0.013071757 | 0.081148 | 0.161085 | 0.872027 | 0.938947 |
| 18660 | RELL1     | 836.7107242 | 0.013028536 | 0.151383 | 0.086064 | 0.931416 | 0.978432 |
| 18481 | KDM3A     | 1745.728944 | 0.012904077 | 0.112846 | 0.114351 | 0.908959 | 0.964045 |
| 18275 | PDCD2     | 581.5454691 | 0.012811472 | 0.086722 | 0.14773  | 0.882556 | 0.946593 |
| 19033 | EPHB3     | 120.6837875 | 0.012627299 | 0.284182 | 0.044434 | 0.964559 | 0.989949 |
| 18790 | AFAP1L2   | 451.9427964 | 0.012576141 | 0.177993 | 0.070655 | 0.943672 | 0.984402 |
| 19142 | PCP4L1    | 2.352184313 | 0.012461731 | 0.283144 | 0.044012 | 0.964895 | 0.989949 |
| 18402 | GBF1      | 1741.175087 | 0.011893556 | 0.092931 | 0.127983 | 0.898163 | 0.956652 |
| 19250 | CABP1     | 178.0820206 | 0.011778349 | 0.394143 | 0.029883 | 0.97616  | 0.993674 |
| 19193 | STAC      | 63.71179002 | 0.01177006  | 0.28682  | 0.041036 | 0.967267 | 0.989949 |
| 18488 | GTPBP1    | 1082.178969 | 0.011765819 | 0.103741 | 0.113415 | 0.909701 | 0.964467 |
| 18554 | NAA25     | 565.1124551 | 0.011643279 | 0.114409 | 0.101769 | 0.91894  | 0.970766 |
| 18746 | ZFP41     | 263.7549957 | 0.011491193 | 0.150252 | 0.076479 | 0.939038 | 0.981867 |
| 18447 | TSEN2     | 117.0724645 | 0.011395459 | 0.094074 | 0.121133 | 0.903586 | 0.960112 |
| 18813 | SMPD1     | 1193.205424 | 0.011356788 | 0.167256 | 0.067901 | 0.945865 | 0.985483 |
| 18296 | RFWD3     | 572.8405448 | 0.011224667 | 0.077601 | 0.144646 | 0.88499  | 0.948114 |
| 18114 | NCOA5     | 895.4035866 | 0.010946866 | 0.060478 | 0.181007 | 0.856362 | 0.926611 |
| 18880 | LOC284441 | 80.39964787 | 0.010933895 | 0.17519  | 0.062412 | 0.950235 | 0.986718 |
| 18821 | HOXB4     | 139.2212657 | 0.010914626 | 0.16465  | 0.06629  | 0.947147 | 0.986438 |
| 18709 | SEPT7P2   | 139.4066115 | 0.010895982 | 0.137195 | 0.07942  | 0.936699 | 0.981358 |
| 19422 | UGT3A2    | 12.52660518 | 0.010740206 | 0.476168 | 0.022555 | 0.982005 | 0.994878 |
| 18787 | PION      | 727.3072823 | 0.010577443 | 0.148578 | 0.071191 | 0.943246 | 0.984062 |
| 18777 | ZNF266    | 565.5393945 | 0.010535588 | 0.143336 | 0.073503 | 0.941406 | 0.982718 |
| 18783 | TICAM1    | 689.8942071 | 0.010496855 | 0.145693 | 0.072048 | 0.942564 | 0.983656 |
| 18522 | CXorf26   | 411.5649474 | 0.010404847 | 0.098153 | 0.106006 | 0.915577 | 0.968914 |
| 18935 | SLC25A45  | 162.718293  | 0.01032978  | 0.169693 | 0.060873 | 0.95146  | 0.986718 |

|       |           |             |             |          |          |          |          |
|-------|-----------|-------------|-------------|----------|----------|----------|----------|
| 19229 | VIPR2     | 8.913863973 | 0.010301843 | 0.292542 | 0.035215 | 0.971908 | 0.990711 |
| 18756 | DCTPP1    | 639.8106375 | 0.010291548 | 0.136129 | 0.075602 | 0.939736 | 0.982073 |
| 18583 | ERCC5     | 1523.991121 | 0.010061428 | 0.1042   | 0.096559 | 0.923077 | 0.972284 |
| 18922 | PRH1      | 42.19182143 | 0.009796445 | 0.150113 | 0.065261 | 0.947966 | 0.986718 |
| 18362 | PPP1R11   | 1539.163313 | 0.009771524 | 0.071916 | 0.135874 | 0.89192  | 0.952104 |
| 18818 | ALG6      | 303.6624171 | 0.009610847 | 0.143073 | 0.067175 | 0.946443 | 0.985771 |
| 18791 | RNASEK    | 2757.853641 | 0.009500402 | 0.134583 | 0.070591 | 0.943723 | 0.984403 |
| 18361 | HNRNPA0   | 2775.633897 | 0.009473654 | 0.069674 | 0.135972 | 0.891843 | 0.952074 |
| 18742 | TSEN15    | 443.4004114 | 0.009118013 | 0.116759 | 0.078093 | 0.937754 | 0.981752 |
| 18725 | MGC16142  | 10.89499933 | 0.008959435 | 0.116543 | 0.076877 | 0.938722 | 0.981752 |
| 19242 | ZNF702P   | 250.6874783 | 0.008953173 | 0.270987 | 0.033039 | 0.973643 | 0.991809 |
| 18407 | PSMD11    | 1024.439848 | 0.008878085 | 0.070086 | 0.126675 | 0.899198 | 0.957526 |
| 18854 | FAM66C    | 27.04201886 | 0.008830057 | 0.151959 | 0.058108 | 0.953663 | 0.986718 |
| 18964 | C1orf97   | 107.0251812 | 0.008506134 | 0.150069 | 0.056681 | 0.954799 | 0.986871 |
| 19280 | C11orf42  | 1.051376052 | 0.008389005 | 0.366348 | 0.022899 | 0.981731 | 0.994878 |
| 19246 | ZNF280B   | 44.14526091 | 0.008385836 | 0.261021 | 0.032127 | 0.974371 | 0.99237  |
| 18422 | HNRNPC    | 8127.074496 | 0.008381644 | 0.067111 | 0.124892 | 0.900609 | 0.958196 |
| 18763 | TMEM181   | 915.6049162 | 0.008232598 | 0.110074 | 0.074792 | 0.94038  | 0.982432 |
| 19217 | MGC16384  | 20.41036464 | 0.007805875 | 0.211769 | 0.03686  | 0.970596 | 0.990054 |
| 19003 | BMP2K     | 575.2174219 | 0.007730535 | 0.163411 | 0.047307 | 0.962268 | 0.989949 |
| 19084 | MPV17L2   | 231.2506793 | 0.007673661 | 0.19132  | 0.040109 | 0.968006 | 0.989949 |
| 19326 | KCP       | 277.2220287 | 0.007658704 | 0.343177 | 0.022317 | 0.982195 | 0.994878 |
| 18755 | INPP5K    | 856.2539119 | 0.007630916 | 0.100817 | 0.075691 | 0.939665 | 0.982052 |
| 18950 | TCF12     | 1845.791502 | 0.007588096 | 0.127564 | 0.059484 | 0.952566 | 0.986718 |
| 19249 | MYO15B    | 2493.673731 | 0.007428799 | 0.244456 | 0.030389 | 0.975757 | 0.9936   |
| 18997 | ACSF3     | 402.4996675 | 0.007417604 | 0.14854  | 0.049937 | 0.960173 | 0.989949 |
| 19440 | PRO0611   | 0.471963094 | 0.00734793  | 0.49685  | 0.014789 | 0.9882   | 0.996385 |
| 18757 | GTF2E1    | 267.4272029 | 0.007142754 | 0.094654 | 0.075462 | 0.939847 | 0.982137 |
| 19449 | CHRNA1    | 0.302988765 | 0.007047646 | 0.572062 | 0.01232  | 0.990171 | 0.997858 |
| 19472 | CXADRP2   | 0.346611338 | 0.007047584 | 0.661987 | 0.010646 | 0.991506 | 0.998328 |
| 19467 | C9orf144  | 0.26293436  | 0.007047447 | 0.734753 | 0.009592 | 0.992347 | 0.998328 |
| 19513 | LYPD4     | 0.259018577 | 0.007047396 | 0.774711 | 0.009097 | 0.992742 | 0.998328 |
| 19517 | CRNA0005  | 0.343386205 | 0.007047362 | 0.860966 | 0.008185 | 0.993469 | 0.998328 |
| 19542 | ABPC1L2I  | 0.260708472 | 0.007047338 | 0.817633 | 0.008619 | 0.993123 | 0.998328 |
| 19465 | C3orf27   | 0.246536109 | 0.007047336 | 0.805927 | 0.008744 | 0.993023 | 0.998328 |
| 19459 | BPESC1    | 0.293725356 | 0.007047137 | 0.986282 | 0.007145 | 0.994299 | 0.998328 |
| 19538 | OR5K1     | 0.169023266 | 0.007046795 | 1.058253 | 0.006659 | 0.994687 | 0.998328 |
| 19498 | IMP5      | 0.223059863 | 0.00704671  | 1.149544 | 0.00613  | 0.995109 | 0.998328 |
| 19507 | LOC284632 | 0.186117291 | 0.007046669 | 1.133718 | 0.006216 | 0.995041 | 0.998328 |
| 19565 | RNASE11   | 0.247426236 | 0.007046566 | 1.237169 | 0.005696 | 0.995456 | 0.998328 |
| 19544 | PADI6     | 0.163274834 | 0.007046439 | 1.21667  | 0.005792 | 0.995379 | 0.998328 |
| 19511 | LOC441601 | 0.145811633 | 0.007046135 | 1.317612 | 0.005348 | 0.995733 | 0.998328 |
| 19559 | PRAMEF8   | 0.126315303 | 0.007046072 | 1.32246  | 0.005328 | 0.995749 | 0.998328 |
| 19492 | HRH3      | 0.108808443 | 0.007045652 | 1.446507 | 0.004871 | 0.996114 | 0.998328 |
| 19500 | ISL1      | 0.107552596 | 0.007045647 | 1.44817  | 0.004865 | 0.996118 | 0.998328 |
| 19475 | FAM92A3   | 0.14172182  | 0.007045429 | 1.558785 | 0.00452  | 0.996394 | 0.998328 |
| 19456 | ANXA10    | 0.107473063 | 0.007045209 | 1.582509 | 0.004452 | 0.996448 | 0.998328 |

|       |           |             |             |          |          |          |          |
|-------|-----------|-------------|-------------|----------|----------|----------|----------|
| 19528 | OR2C3     | 0.107307102 | 0.007045208 | 1.582766 | 0.004451 | 0.996448 | 0.998328 |
| 19561 | PRY2      | 0.185420576 | 0.007045146 | 1.694113 | 0.004159 | 0.996682 | 0.998328 |
| 19569 | 44088     | 0.146904455 | 0.007044942 | 1.705436 | 0.004131 | 0.996704 | 0.998328 |
| 19480 | GABRG2    | 0.128447644 | 0.007044802 | 1.721072 | 0.004093 | 0.996734 | 0.998328 |
| 19554 | POU4F2    | 0.108940996 | 0.007044655 | 1.73746  | 0.004055 | 0.996765 | 0.998328 |
| 19494 | HTR3C     | 0.106803581 | 0.007044641 | 1.741315 | 0.004046 | 0.996772 | 0.998328 |
| 19455 | ACTL7B    | 0.088191048 | 0.007044442 | 1.769915 | 0.00398  | 0.996824 | 0.998328 |
| 19482 | GJA8      | 0.088174462 | 0.007044442 | 1.769953 | 0.00398  | 0.996824 | 0.998328 |
| 19479 | FOXD4L3   | 0.086521017 | 0.007044427 | 1.773793 | 0.003971 | 0.996831 | 0.998328 |
| 19491 | HIST1H2BI | 0.108052528 | 0.007043899 | 1.929029 | 0.003652 | 0.997087 | 0.998328 |
| 19541 | OTX2      | 0.10307081  | 0.007042822 | 2.173124 | 0.003241 | 0.997414 | 0.998328 |
| 19555 | PPP1R2P9  | 0.069341938 | 0.007042069 | 2.268489 | 0.003104 | 0.997523 | 0.998328 |
| 19583 | TMEM146   | 0.068956115 | 0.00704206  | 2.27025  | 0.003102 | 0.997525 | 0.998328 |
| 19563 | R3HDML    | 0.067666155 | 0.007042029 | 2.276227 | 0.003094 | 0.997532 | 0.998328 |
| 19536 | OR5B2     | 0.067621664 | 0.007042028 | 2.276436 | 0.003093 | 0.997532 | 0.998328 |
| 19576 | SNORA65   | 0.066684802 | 0.007042005 | 2.28087  | 0.003087 | 0.997537 | 0.998328 |
| 19499 | IQCF3     | 0.126960764 | 0.007041846 | 2.405018 | 0.002928 | 0.997664 | 0.998328 |
| 19533 | OR52N5    | 0.088676494 | 0.007040976 | 2.503989 | 0.002812 | 0.997756 | 0.998328 |
| 19591 | USP29     | 0.085899782 | 0.007040928 | 2.512567 | 0.002802 | 0.997764 | 0.998328 |
| 19502 | KCNG4     | 0.071738578 | 0.00704041  | 2.570955 | 0.002738 | 0.997815 | 0.998328 |
| 19531 | OR4F15    | 0.071280006 | 0.007040395 | 2.57349  | 0.002736 | 0.997817 | 0.998328 |
| 19580 | STARD6    | 0.069850315 | 0.007040348 | 2.581529 | 0.002727 | 0.997824 | 0.998328 |
| 19568 | SEBOX     | 0.06929789  | 0.007040329 | 2.584691 | 0.002724 | 0.997827 | 0.998328 |
| 19483 | GLT6D1    | 0.066277234 | 0.007040224 | 2.602567 | 0.002705 | 0.997842 | 0.998328 |
| 19501 | KBTBD5    | 0.065462974 | 0.007040195 | 2.607564 | 0.0027   | 0.997846 | 0.998328 |
| 19526 | OR1L1     | 0.068388632 | 0.007038276 | 2.91407  | 0.002415 | 0.998073 | 0.998328 |
| 19476 | FGF16     | 0.068810894 | 0.007038276 | 2.91407  | 0.002415 | 0.998073 | 0.998328 |
| 19594 | ZAR1      | 0.04905305  | 0.007038031 | 2.91407  | 0.002415 | 0.998073 | 0.998328 |
| 19529 | OR2L3     | 0.048404328 | 0.007038031 | 2.91407  | 0.002415 | 0.998073 | 0.998328 |
| 19575 | SNORA37   | 0.05027878  | 0.007038031 | 2.91407  | 0.002415 | 0.998073 | 0.998328 |
| 19523 | OR11H6    | 0.046668589 | 0.007038031 | 2.91407  | 0.002415 | 0.998073 | 0.998328 |
| 19579 | SNTN      | 0.04835586  | 0.007038031 | 2.91407  | 0.002415 | 0.998073 | 0.998328 |
| 19567 | SCARNA8   | 0.049911135 | 0.007038031 | 2.91407  | 0.002415 | 0.998073 | 0.998328 |
| 19496 | IFNA8     | 0.048552493 | 0.007038031 | 2.91407  | 0.002415 | 0.998073 | 0.998328 |
| 19466 | C6orf10   | 0.051323388 | 0.007038031 | 2.91407  | 0.002415 | 0.998073 | 0.998328 |
| 19522 | OR10A4    | 0.049693203 | 0.007038031 | 2.91407  | 0.002415 | 0.998073 | 0.998328 |
| 19486 | GPR101    | 0.047471335 | 0.007038031 | 2.91407  | 0.002415 | 0.998073 | 0.998328 |
| 19505 | KRTAP7-1  | 0.048899835 | 0.007038031 | 2.91407  | 0.002415 | 0.998073 | 0.998328 |
| 19508 | LOC284788 | 0.04845117  | 0.007038031 | 2.91407  | 0.002415 | 0.998073 | 0.998328 |
| 19516 | MYF5      | 0.0488551   | 0.007038031 | 2.91407  | 0.002415 | 0.998073 | 0.998328 |
| 19596 | ZIM3      | 0.047594359 | 0.007038031 | 2.91407  | 0.002415 | 0.998073 | 0.998328 |
| 19484 | GLYATL3   | 0.047539826 | 0.007038031 | 2.91407  | 0.002415 | 0.998073 | 0.998328 |
| 19509 | LOC285627 | 0.049221649 | 0.007038031 | 2.91407  | 0.002415 | 0.998073 | 0.998328 |
| 19543 | PABPNIL   | 0.048585279 | 0.007038031 | 2.91407  | 0.002415 | 0.998073 | 0.998328 |
| 19592 | VCX2      | 0.029063939 | 0.007037786 | 2.91407  | 0.002415 | 0.998073 | 0.998328 |
| 19470 | CSN2      | 0.030168934 | 0.007037786 | 2.91407  | 0.002415 | 0.998073 | 0.998328 |
| 19578 | NORD115   | 0.027970382 | 0.007037786 | 2.91407  | 0.002415 | 0.998073 | 0.998328 |



|       |           |             |             |         |          |          |          |
|-------|-----------|-------------|-------------|---------|----------|----------|----------|
| 19457 | ASB10     | 0.029242899 | 0.007037786 | 2.91407 | 0.002415 | 0.998073 | 0.998328 |
| 19477 | FKSG73    | 0.028970029 | 0.007037786 | 2.91407 | 0.002415 | 0.998073 | 0.998328 |
| 19535 | OR5B21    | 0.027996159 | 0.007037786 | 2.91407 | 0.002415 | 0.998073 | 0.998328 |
| 19577 | SNORA71C  | 0.02928194  | 0.007037786 | 2.91407 | 0.002415 | 0.998073 | 0.998328 |
| 19464 | C3orf24   | 0.029116467 | 0.007037786 | 2.91407 | 0.002415 | 0.998073 | 0.998328 |
| 19468 | CLEC2A    | 0.032371485 | 0.007037786 | 2.91407 | 0.002415 | 0.998073 | 0.998328 |
| 19487 | GPR119    | 0.028590529 | 0.007037786 | 2.91407 | 0.002415 | 0.998073 | 0.998328 |
| 19525 | OR1D2     | 0.028822179 | 0.007037786 | 2.91407 | 0.002415 | 0.998073 | 0.998328 |
| 19527 | OR2A12    | 0.030235827 | 0.007037786 | 2.91407 | 0.002415 | 0.998073 | 0.998328 |
| 19530 | OR4C3     | 0.029014371 | 0.007037786 | 2.91407 | 0.002415 | 0.998073 | 0.998328 |
| 19590 | USP26     | 0.030434678 | 0.007037786 | 2.91407 | 0.002415 | 0.998073 | 0.998328 |
| 19506 | LCE3D     | 0.02902417  | 0.007037786 | 2.91407 | 0.002415 | 0.998073 | 0.998328 |
| 19512 | LRRC30    | 0.028252527 | 0.007037786 | 2.91407 | 0.002415 | 0.998073 | 0.998328 |
| 19460 | C10orf122 | 0.029733852 | 0.007037786 | 2.91407 | 0.002415 | 0.998073 | 0.998328 |
| 19462 | C15orf43  | 0.028959785 | 0.007037786 | 2.91407 | 0.002415 | 0.998073 | 0.998328 |
| 19495 | IFNA10    | 0.026672257 | 0.007037786 | 2.91407 | 0.002415 | 0.998073 | 0.998328 |
| 19497 | IL3       | 0.029047982 | 0.007037786 | 2.91407 | 0.002415 | 0.998073 | 0.998328 |
| 19504 | KRTAP10-4 | 0.028965044 | 0.007037786 | 2.91407 | 0.002415 | 0.998073 | 0.998328 |
| 19532 | OR52A5    | 0.028203093 | 0.007037786 | 2.91407 | 0.002415 | 0.998073 | 0.998328 |
| 19537 | OR5H6     | 0.027253271 | 0.007037786 | 2.91407 | 0.002415 | 0.998073 | 0.998328 |
| 19557 | PRAMEF13  | 0.027130459 | 0.007037786 | 2.91407 | 0.002415 | 0.998073 | 0.998328 |
| 19564 | RESP18    | 0.027462801 | 0.007037786 | 2.91407 | 0.002415 | 0.998073 | 0.998328 |
| 19573 | SNAR-B2   | 0.029632699 | 0.007037786 | 2.91407 | 0.002415 | 0.998073 | 0.998328 |
| 19582 | TMCO5A    | 0.028377906 | 0.007037786 | 2.91407 | 0.002415 | 0.998073 | 0.998328 |
| 19461 | C10orf40  | 0.028741949 | 0.007037786 | 2.91407 | 0.002415 | 0.998073 | 0.998328 |
| 19463 | C17orf105 | 0.027713295 | 0.007037786 | 2.91407 | 0.002415 | 0.998073 | 0.998328 |
| 19471 | CST9L     | 0.028702563 | 0.007037786 | 2.91407 | 0.002415 | 0.998073 | 0.998328 |
| 19488 | GPR139    | 0.028576597 | 0.007037786 | 2.91407 | 0.002415 | 0.998073 | 0.998328 |
| 19489 | GPR149    | 0.027878303 | 0.007037786 | 2.91407 | 0.002415 | 0.998073 | 0.998328 |
| 19510 | LOC29034  | 0.027579727 | 0.007037786 | 2.91407 | 0.002415 | 0.998073 | 0.998328 |
| 19515 | MRGPRX2   | 0.027654182 | 0.007037786 | 2.91407 | 0.002415 | 0.998073 | 0.998328 |
| 19520 | OPN1MW    | 0.028105695 | 0.007037786 | 2.91407 | 0.002415 | 0.998073 | 0.998328 |
| 19524 | OR1C1     | 0.028832996 | 0.007037786 | 2.91407 | 0.002415 | 0.998073 | 0.998328 |
| 19539 | OR5T1     | 0.026976198 | 0.007037786 | 2.91407 | 0.002415 | 0.998073 | 0.998328 |
| 19540 | OR8D2     | 0.027822747 | 0.007037786 | 2.91407 | 0.002415 | 0.998073 | 0.998328 |
| 19546 | PATE1     | 0.027951405 | 0.007037786 | 2.91407 | 0.002415 | 0.998073 | 0.998328 |
| 19550 | PCNAP1    | 0.028945362 | 0.007037786 | 2.91407 | 0.002415 | 0.998073 | 0.998328 |
| 19553 | POTEG     | 0.028209183 | 0.007037786 | 2.91407 | 0.002415 | 0.998073 | 0.998328 |
| 19556 | PRAMEF12  | 0.028025867 | 0.007037786 | 2.91407 | 0.002415 | 0.998073 | 0.998328 |
| 19558 | PRAMEF4   | 0.027628373 | 0.007037786 | 2.91407 | 0.002415 | 0.998073 | 0.998328 |
| 19570 | SERPINA13 | 0.028079395 | 0.007037786 | 2.91407 | 0.002415 | 0.998073 | 0.998328 |
| 19574 | SNORA11   | 0.029319955 | 0.007037786 | 2.91407 | 0.002415 | 0.998073 | 0.998328 |
| 19581 | TBPL2     | 0.029804591 | 0.007037786 | 2.91407 | 0.002415 | 0.998073 | 0.998328 |
| 19584 | TMEM202   | 0.027826479 | 0.007037786 | 2.91407 | 0.002415 | 0.998073 | 0.998328 |
| 19585 | TMEM89    | 0.029459335 | 0.007037786 | 2.91407 | 0.002415 | 0.998073 | 0.998328 |
| 19588 | UCMA      | 0.029443321 | 0.007037786 | 2.91407 | 0.002415 | 0.998073 | 0.998328 |
| 19552 | PLUNC     | 0.03146396  | 0.007037786 | 2.91407 | 0.002415 | 0.998073 | 0.998328 |

|       |           |             |             |         |          |          |          |
|-------|-----------|-------------|-------------|---------|----------|----------|----------|
| 19587 | TSPY2     | 0.029148652 | 0.007037786 | 2.91407 | 0.002415 | 0.998073 | 0.998328 |
| 19521 | OPRD1     | 0.029804914 | 0.007037786 | 2.91407 | 0.002415 | 0.998073 | 0.998328 |
| 19560 | PRNT      | 0.028218847 | 0.007037786 | 2.91407 | 0.002415 | 0.998073 | 0.998328 |
| 19666 | CSPG4PY2  | 0.009943144 | 0.007037541 | 2.91407 | 0.002415 | 0.998073 | NA       |
| 20045 | OR5K3     | 0.009943144 | 0.007037541 | 2.91407 | 0.002415 | 0.998073 | NA       |
| 19604 | ACTRT2    | 0.008597403 | 0.007037541 | 2.91407 | 0.002415 | 0.998073 | NA       |
| 19609 | ATXN3L    | 0.008597403 | 0.007037541 | 2.91407 | 0.002415 | 0.998073 | NA       |
| 19611 | BCYRN1    | 0.008597403 | 0.007037541 | 2.91407 | 0.002415 | 0.998073 | NA       |
| 19612 | BEYLA     | 0.008597403 | 0.007037541 | 2.91407 | 0.002415 | 0.998073 | NA       |
| 19622 | C14orf86  | 0.008597403 | 0.007037541 | 2.91407 | 0.002415 | 0.998073 | NA       |
| 19627 | C20orf166 | 0.009772179 | 0.007037541 | 2.91407 | 0.002415 | 0.998073 | NA       |
| 19635 | C21orf94  | 0.008597403 | 0.007037541 | 2.91407 | 0.002415 | 0.998073 | NA       |
| 19640 | C4orf11   | 0.008597403 | 0.007037541 | 2.91407 | 0.002415 | 0.998073 | NA       |
| 19642 | C5orf52   | 0.010046964 | 0.007037541 | 2.91407 | 0.002415 | 0.998073 | NA       |
| 19652 | CEACAM1   | 0.009746144 | 0.007037541 | 2.91407 | 0.002415 | 0.998073 | NA       |
| 19653 | CELA2B    | 0.010283642 | 0.007037541 | 2.91407 | 0.002415 | 0.998073 | NA       |
| 19655 | CETN1     | 0.008597403 | 0.007037541 | 2.91407 | 0.002415 | 0.998073 | NA       |
| 19658 | CLDN25    | 0.008597403 | 0.007037541 | 2.91407 | 0.002415 | 0.998073 | NA       |
| 19659 | CNBD1     | 0.010046964 | 0.007037541 | 2.91407 | 0.002415 | 0.998073 | NA       |
| 19660 | CRYGA     | 0.008597403 | 0.007037541 | 2.91407 | 0.002415 | 0.998073 | NA       |
| 19664 | CSN1S1    | 0.00984087  | 0.007037541 | 2.91407 | 0.002415 | 0.998073 | NA       |
| 19667 | CST11     | 0.009523784 | 0.007037541 | 2.91407 | 0.002415 | 0.998073 | NA       |
| 19672 | CT47A1    | 0.009670454 | 0.007037541 | 2.91407 | 0.002415 | 0.998073 | NA       |
| 19679 | CXorf51   | 0.008597403 | 0.007037541 | 2.91407 | 0.002415 | 0.998073 | NA       |
| 19681 | CYP11B2   | 0.014320994 | 0.007037541 | 2.91407 | 0.002415 | 0.998073 | NA       |
| 19683 | DAOA      | 0.008597403 | 0.007037541 | 2.91407 | 0.002415 | 0.998073 | NA       |
| 19713 | DMRTB1    | 0.008597403 | 0.007037541 | 2.91407 | 0.002415 | 0.998073 | NA       |
| 19718 | FABP12    | 0.009354564 | 0.007037541 | 2.91407 | 0.002415 | 0.998073 | NA       |
| 19725 | FERD3L    | 0.009670454 | 0.007037541 | 2.91407 | 0.002415 | 0.998073 | NA       |
| 19736 | GABRR3    | 0.009746144 | 0.007037541 | 2.91407 | 0.002415 | 0.998073 | NA       |
| 19755 | GOLGA2P3  | 0.009354564 | 0.007037541 | 2.91407 | 0.002415 | 0.998073 | NA       |
| 19762 | GSTTP1    | 0.008597403 | 0.007037541 | 2.91407 | 0.002415 | 0.998073 | NA       |
| 19774 | HIGD1C    | 0.010768212 | 0.007037541 | 2.91407 | 0.002415 | 0.998073 | NA       |
| 19776 | HIST1H4L  | 0.009289    | 0.007037541 | 2.91407 | 0.002415 | 0.998073 | NA       |
| 19778 | HSFYL1    | 0.008597403 | 0.007037541 | 2.91407 | 0.002415 | 0.998073 | NA       |
| 19780 | HTN3      | 0.009670454 | 0.007037541 | 2.91407 | 0.002415 | 0.998073 | NA       |
| 19781 | HYALP1    | 0.008597403 | 0.007037541 | 2.91407 | 0.002415 | 0.998073 | NA       |
| 19785 | IFNA2     | 0.008597403 | 0.007037541 | 2.91407 | 0.002415 | 0.998073 | NA       |
| 19786 | IFNA4     | 0.008597403 | 0.007037541 | 2.91407 | 0.002415 | 0.998073 | NA       |
| 19788 | IFNA7     | 0.008597403 | 0.007037541 | 2.91407 | 0.002415 | 0.998073 | NA       |
| 19798 | KCNK18    | 0.009746144 | 0.007037541 | 2.91407 | 0.002415 | 0.998073 | NA       |
| 19800 | KRT76     | 0.008597403 | 0.007037541 | 2.91407 | 0.002415 | 0.998073 | NA       |
| 19803 | KRTAP10-3 | 0.008597403 | 0.007037541 | 2.91407 | 0.002415 | 0.998073 | NA       |
| 19804 | KRTAP10-5 | 0.008597403 | 0.007037541 | 2.91407 | 0.002415 | 0.998073 | NA       |
| 19806 | KRTAP10-7 | 0.008597403 | 0.007037541 | 2.91407 | 0.002415 | 0.998073 | NA       |
| 19810 | KRTAP12-2 | 0.008597403 | 0.007037541 | 2.91407 | 0.002415 | 0.998073 | NA       |
| 19837 | KRTAP4-2  | 0.008597403 | 0.007037541 | 2.91407 | 0.002415 | 0.998073 | NA       |

|       |           |             |             |         |          |          |    |
|-------|-----------|-------------|-------------|---------|----------|----------|----|
| 19840 | KRTAP4-5  | 0.008597403 | 0.007037541 | 2.91407 | 0.002415 | 0.998073 | NA |
| 19841 | KRTAP4-7  | 0.008597403 | 0.007037541 | 2.91407 | 0.002415 | 0.998073 | NA |
| 19842 | KRTAP4-8  | 0.008597403 | 0.007037541 | 2.91407 | 0.002415 | 0.998073 | NA |
| 19848 | KRTAP9-2  | 0.008597403 | 0.007037541 | 2.91407 | 0.002415 | 0.998073 | NA |
| 19851 | KRTAP9-9  | 0.008597403 | 0.007037541 | 2.91407 | 0.002415 | 0.998073 | NA |
| 19857 | LCE2B     | 0.008597403 | 0.007037541 | 2.91407 | 0.002415 | 0.998073 | NA |
| 19860 | LCE3A     | 0.009746144 | 0.007037541 | 2.91407 | 0.002415 | 0.998073 | NA |
| 19881 | LOC286135 | 0.008597403 | 0.007037541 | 2.91407 | 0.002415 | 0.998073 | NA |
| 19882 | LOC286238 | 0.008597403 | 0.007037541 | 2.91407 | 0.002415 | 0.998073 | NA |
| 19888 | LOC644145 | 0.010128162 | 0.007037541 | 2.91407 | 0.002415 | 0.998073 | NA |
| 19889 | LOC646815 | 0.009354564 | 0.007037541 | 2.91407 | 0.002415 | 0.998073 | NA |
| 19898 | LYZL1     | 0.009772179 | 0.007037541 | 2.91407 | 0.002415 | 0.998073 | NA |
| 19904 | MMD2      | 0.008597403 | 0.007037541 | 2.91407 | 0.002415 | 0.998073 | NA |
| 19916 | CRNA0011  | 0.008597403 | 0.007037541 | 2.91407 | 0.002415 | 0.998073 | NA |
| 19934 | OR10C1    | 0.009138916 | 0.007037541 | 2.91407 | 0.002415 | 0.998073 | NA |
| 19937 | OR10G9    | 0.008597403 | 0.007037541 | 2.91407 | 0.002415 | 0.998073 | NA |
| 19938 | OR10H3    | 0.008597403 | 0.007037541 | 2.91407 | 0.002415 | 0.998073 | NA |
| 19943 | OR10R2    | 0.008597403 | 0.007037541 | 2.91407 | 0.002415 | 0.998073 | NA |
| 19948 | OR13C2    | 0.009354564 | 0.007037541 | 2.91407 | 0.002415 | 0.998073 | NA |
| 19955 | OR14A16   | 0.008597403 | 0.007037541 | 2.91407 | 0.002415 | 0.998073 | NA |
| 19957 | OR14J1    | 0.009632296 | 0.007037541 | 2.91407 | 0.002415 | 0.998073 | NA |
| 19958 | OR1A1     | 0.008597403 | 0.007037541 | 2.91407 | 0.002415 | 0.998073 | NA |
| 19962 | OR1S1     | 0.008597403 | 0.007037541 | 2.91407 | 0.002415 | 0.998073 | NA |
| 19968 | OR2J3     | 0.008597403 | 0.007037541 | 2.91407 | 0.002415 | 0.998073 | NA |
| 19974 | OR2M5     | 0.008597403 | 0.007037541 | 2.91407 | 0.002415 | 0.998073 | NA |
| 19976 | OR2T12    | 0.008597403 | 0.007037541 | 2.91407 | 0.002415 | 0.998073 | NA |
| 19978 | OR2T27    | 0.009772179 | 0.007037541 | 2.91407 | 0.002415 | 0.998073 | NA |
| 19981 | OR2W1     | 0.008597403 | 0.007037541 | 2.91407 | 0.002415 | 0.998073 | NA |
| 19982 | OR2W5     | 0.009354564 | 0.007037541 | 2.91407 | 0.002415 | 0.998073 | NA |
| 19989 | OR4C12    | 0.008597403 | 0.007037541 | 2.91407 | 0.002415 | 0.998073 | NA |
| 19990 | OR4C13    | 0.008597403 | 0.007037541 | 2.91407 | 0.002415 | 0.998073 | NA |
| 19992 | OR4C45    | 0.008597403 | 0.007037541 | 2.91407 | 0.002415 | 0.998073 | NA |
| 19997 | OR4E2     | 0.008597403 | 0.007037541 | 2.91407 | 0.002415 | 0.998073 | NA |
| 20003 | OR4K15    | 0.008597403 | 0.007037541 | 2.91407 | 0.002415 | 0.998073 | NA |
| 20004 | OR4K1     | 0.008597403 | 0.007037541 | 2.91407 | 0.002415 | 0.998073 | NA |
| 20005 | OR4K5     | 0.008597403 | 0.007037541 | 2.91407 | 0.002415 | 0.998073 | NA |
| 20006 | OR4L1     | 0.008597403 | 0.007037541 | 2.91407 | 0.002415 | 0.998073 | NA |
| 20008 | OR4N5     | 0.008597403 | 0.007037541 | 2.91407 | 0.002415 | 0.998073 | NA |
| 20012 | OR51B6    | 0.008597403 | 0.007037541 | 2.91407 | 0.002415 | 0.998073 | NA |
| 20016 | OR51S1    | 0.008597403 | 0.007037541 | 2.91407 | 0.002415 | 0.998073 | NA |
| 20018 | OR52A4    | 0.008597403 | 0.007037541 | 2.91407 | 0.002415 | 0.998073 | NA |
| 20021 | OR52E8    | 0.008597403 | 0.007037541 | 2.91407 | 0.002415 | 0.998073 | NA |
| 20028 | OR5AC2    | 0.008597403 | 0.007037541 | 2.91407 | 0.002415 | 0.998073 | NA |
| 20030 | OR5AR1    | 0.008597403 | 0.007037541 | 2.91407 | 0.002415 | 0.998073 | NA |
| 20032 | OR5B17    | 0.008597403 | 0.007037541 | 2.91407 | 0.002415 | 0.998073 | NA |
| 20033 | OR5B3     | 0.008597403 | 0.007037541 | 2.91407 | 0.002415 | 0.998073 | NA |
| 20036 | OR5D16    | 0.008597403 | 0.007037541 | 2.91407 | 0.002415 | 0.998073 | NA |

|       |           |             |             |         |          |          |    |
|-------|-----------|-------------|-------------|---------|----------|----------|----|
| 20037 | OR5D18    | 0.008597403 | 0.007037541 | 2.91407 | 0.002415 | 0.998073 | NA |
| 20042 | OR5H15    | 0.008597403 | 0.007037541 | 2.91407 | 0.002415 | 0.998073 | NA |
| 20046 | OR5L1     | 0.008597403 | 0.007037541 | 2.91407 | 0.002415 | 0.998073 | NA |
| 20050 | OR5M3     | 0.008597403 | 0.007037541 | 2.91407 | 0.002415 | 0.998073 | NA |
| 20053 | OR5P3     | 0.008597403 | 0.007037541 | 2.91407 | 0.002415 | 0.998073 | NA |
| 20060 | OR6C3     | 0.008597403 | 0.007037541 | 2.91407 | 0.002415 | 0.998073 | NA |
| 20061 | OR6C4     | 0.008597403 | 0.007037541 | 2.91407 | 0.002415 | 0.998073 | NA |
| 20062 | OR6C6     | 0.008597403 | 0.007037541 | 2.91407 | 0.002415 | 0.998073 | NA |
| 20065 | OR6C70    | 0.008597403 | 0.007037541 | 2.91407 | 0.002415 | 0.998073 | NA |
| 20069 | OR6K2     | 0.008597403 | 0.007037541 | 2.91407 | 0.002415 | 0.998073 | NA |
| 20071 | OR6N1     | 0.008597403 | 0.007037541 | 2.91407 | 0.002415 | 0.998073 | NA |
| 20073 | OR6P1     | 0.008597403 | 0.007037541 | 2.91407 | 0.002415 | 0.998073 | NA |
| 20077 | OR7A10    | 0.008597403 | 0.007037541 | 2.91407 | 0.002415 | 0.998073 | NA |
| 20084 | OR8B12    | 0.008597403 | 0.007037541 | 2.91407 | 0.002415 | 0.998073 | NA |
| 20086 | OR8B8     | 0.008597403 | 0.007037541 | 2.91407 | 0.002415 | 0.998073 | NA |
| 20088 | OR8D4     | 0.008597403 | 0.007037541 | 2.91407 | 0.002415 | 0.998073 | NA |
| 20094 | OR8J1     | 0.008597403 | 0.007037541 | 2.91407 | 0.002415 | 0.998073 | NA |
| 20095 | OR8J3     | 0.008597403 | 0.007037541 | 2.91407 | 0.002415 | 0.998073 | NA |
| 20096 | OR8K1     | 0.008597403 | 0.007037541 | 2.91407 | 0.002415 | 0.998073 | NA |
| 20115 | PRAMEF10  | 0.008597403 | 0.007037541 | 2.91407 | 0.002415 | 0.998073 | NA |
| 20116 | PRAMEF17  | 0.008597403 | 0.007037541 | 2.91407 | 0.002415 | 0.998073 | NA |
| 20139 | RBMV2EP   | 0.009354564 | 0.007037541 | 2.91407 | 0.002415 | 0.998073 | NA |
| 20154 | SCARNA15  | 0.009354564 | 0.007037541 | 2.91407 | 0.002415 | 0.998073 | NA |
| 20163 | SERPINB12 | 0.009746144 | 0.007037541 | 2.91407 | 0.002415 | 0.998073 | NA |
| 20164 | SFTA3     | 0.008597403 | 0.007037541 | 2.91407 | 0.002415 | 0.998073 | NA |
| 20191 | SNORA28   | 0.008597403 | 0.007037541 | 2.91407 | 0.002415 | 0.998073 | NA |
| 20198 | SNORA41   | 0.009772179 | 0.007037541 | 2.91407 | 0.002415 | 0.998073 | NA |
| 20205 | SNORA56   | 0.009772179 | 0.007037541 | 2.91407 | 0.002415 | 0.998073 | NA |
| 20215 | SNORA80   | 0.009648852 | 0.007037541 | 2.91407 | 0.002415 | 0.998073 | NA |
| 20434 | SPANXN1   | 0.009772179 | 0.007037541 | 2.91407 | 0.002415 | 0.998073 | NA |
| 20450 | TAS2R16   | 0.008597403 | 0.007037541 | 2.91407 | 0.002415 | 0.998073 | NA |
| 20451 | TAS2R39   | 0.008597403 | 0.007037541 | 2.91407 | 0.002415 | 0.998073 | NA |
| 20456 | TGIF2LY   | 0.009670454 | 0.007037541 | 2.91407 | 0.002415 | 0.998073 | NA |
| 20464 | TRIM43    | 0.009670454 | 0.007037541 | 2.91407 | 0.002415 | 0.998073 | NA |
| 20466 | TRIM64    | 0.008597403 | 0.007037541 | 2.91407 | 0.002415 | 0.998073 | NA |
| 20491 | UBTFL1    | 0.009746144 | 0.007037541 | 2.91407 | 0.002415 | 0.998073 | NA |
| 20493 | VCY       | 0.008597403 | 0.007037541 | 2.91407 | 0.002415 | 0.998073 | NA |
| 20494 | VN1R2     | 0.008597403 | 0.007037541 | 2.91407 | 0.002415 | 0.998073 | NA |
| 20495 | VN1R4     | 0.008597403 | 0.007037541 | 2.91407 | 0.002415 | 0.998073 | NA |
| 19639 | C2orf51   | 0.009375785 | 0.007037541 | 2.91407 | 0.002415 | 0.998073 | NA |
| 19751 | GHRH      | 0.009375785 | 0.007037541 | 2.91407 | 0.002415 | 0.998073 | NA |
| 19782 | IFNA14    | 0.009375785 | 0.007037541 | 2.91407 | 0.002415 | 0.998073 | NA |
| 19923 | NF1P1     | 0.009375785 | 0.007037541 | 2.91407 | 0.002415 | 0.998073 | NA |
| 19931 | OR10A6    | 0.010649019 | 0.007037541 | 2.91407 | 0.002415 | 0.998073 | NA |
| 20108 | PNLIP     | 0.009375785 | 0.007037541 | 2.91407 | 0.002415 | 0.998073 | NA |
| 20134 | RBMV1A3I  | 0.009375785 | 0.007037541 | 2.91407 | 0.002415 | 0.998073 | NA |
| 19615 | C10orf120 | 0.009308199 | 0.007037541 | 2.91407 | 0.002415 | 0.998073 | NA |

|       |            |             |             |         |          |          |    |
|-------|------------|-------------|-------------|---------|----------|----------|----|
| 19624 | C19orf41   | 0.009387947 | 0.007037541 | 2.91407 | 0.002415 | 0.998073 | NA |
| 19626 | C1orf68    | 0.00914858  | 0.007037541 | 2.91407 | 0.002415 | 0.998073 | NA |
| 19646 | CABP2      | 0.009378496 | 0.007037541 | 2.91407 | 0.002415 | 0.998073 | NA |
| 19662 | CRYGC      | 0.009387947 | 0.007037541 | 2.91407 | 0.002415 | 0.998073 | NA |
| 19710 | DEFB4A     | 0.010081801 | 0.007037541 | 2.91407 | 0.002415 | 0.998073 | NA |
| 19714 | DUPD1      | 0.009546756 | 0.007037541 | 2.91407 | 0.002415 | 0.998073 | NA |
| 19717 | EVX2       | 0.009308199 | 0.007037541 | 2.91407 | 0.002415 | 0.998073 | NA |
| 19720 | FAM194B    | 0.009546756 | 0.007037541 | 2.91407 | 0.002415 | 0.998073 | NA |
| 19722 | FAM27L     | 0.009546756 | 0.007037541 | 2.91407 | 0.002415 | 0.998073 | NA |
| 19726 | FGF4       | 0.009387947 | 0.007037541 | 2.91407 | 0.002415 | 0.998073 | NA |
| 19727 | FLJ25328   | 0.009387947 | 0.007037541 | 2.91407 | 0.002415 | 0.998073 | NA |
| 19730 | FLJ44082   | 0.009387947 | 0.007037541 | 2.91407 | 0.002415 | 0.998073 | NA |
| 19766 | H2BFWT     | 0.009498034 | 0.007037541 | 2.91407 | 0.002415 | 0.998073 | NA |
| 19793 | IL28B      | 0.009387947 | 0.007037541 | 2.91407 | 0.002415 | 0.998073 | NA |
| 19811 | KRTAP12-5  | 0.009387947 | 0.007037541 | 2.91407 | 0.002415 | 0.998073 | NA |
| 19823 | KRTAP19-5  | 0.009387947 | 0.007037541 | 2.91407 | 0.002415 | 0.998073 | NA |
| 19849 | KRTAP9-4   | 0.009387947 | 0.007037541 | 2.91407 | 0.002415 | 0.998073 | NA |
| 19865 | LCE6A      | 0.009546756 | 0.007037541 | 2.91407 | 0.002415 | 0.998073 | NA |
| 19867 | LELP1      | 0.009387947 | 0.007037541 | 2.91407 | 0.002415 | 0.998073 | NA |
| 19874 | LOC1002877 | 0.009450928 | 0.007037541 | 2.91407 | 0.002415 | 0.998073 | NA |
| 19875 | LOC146481  | 0.009387947 | 0.007037541 | 2.91407 | 0.002415 | 0.998073 | NA |
| 19886 | LOC388946  | 0.009387947 | 0.007037541 | 2.91407 | 0.002415 | 0.998073 | NA |
| 19895 | LOC729121  | 0.009387947 | 0.007037541 | 2.91407 | 0.002415 | 0.998073 | NA |
| 19900 | LYZL4      | 0.010081801 | 0.007037541 | 2.91407 | 0.002415 | 0.998073 | NA |
| 19901 | MBD3L2     | 0.009387947 | 0.007037541 | 2.91407 | 0.002415 | 0.998073 | NA |
| 19932 | OR10A7     | 0.009387947 | 0.007037541 | 2.91407 | 0.002415 | 0.998073 | NA |
| 19941 | OR10J5     | 0.009387947 | 0.007037541 | 2.91407 | 0.002415 | 0.998073 | NA |
| 19953 | OR13F1     | 0.009387947 | 0.007037541 | 2.91407 | 0.002415 | 0.998073 | NA |
| 19959 | OR1A2      | 0.009387947 | 0.007037541 | 2.91407 | 0.002415 | 0.998073 | NA |
| 19967 | OR2J2      | 0.009546756 | 0.007037541 | 2.91407 | 0.002415 | 0.998073 | NA |
| 19983 | OR2Y1      | 0.009387947 | 0.007037541 | 2.91407 | 0.002415 | 0.998073 | NA |
| 19994 | OR4D2      | 0.009546756 | 0.007037541 | 2.91407 | 0.002415 | 0.998073 | NA |
| 19999 | OR4F21     | 0.009500523 | 0.007037541 | 2.91407 | 0.002415 | 0.998073 | NA |
| 20031 | OR5AS1     | 0.009387947 | 0.007037541 | 2.91407 | 0.002415 | 0.998073 | NA |
| 20035 | OR5D14     | 0.009546756 | 0.007037541 | 2.91407 | 0.002415 | 0.998073 | NA |
| 20044 | OR5J2      | 0.009387947 | 0.007037541 | 2.91407 | 0.002415 | 0.998073 | NA |
| 20049 | OR5M1      | 0.009387947 | 0.007037541 | 2.91407 | 0.002415 | 0.998073 | NA |
| 20079 | OR7C2      | 0.009387947 | 0.007037541 | 2.91407 | 0.002415 | 0.998073 | NA |
| 20111 | POTEB      | 0.009546756 | 0.007037541 | 2.91407 | 0.002415 | 0.998073 | NA |
| 20130 | PRR21      | 0.009387947 | 0.007037541 | 2.91407 | 0.002415 | 0.998073 | NA |
| 20133 | RAB9BP1    | 0.009387947 | 0.007037541 | 2.91407 | 0.002415 | 0.998073 | NA |
| 20141 | RBMY3AP    | 0.009387947 | 0.007037541 | 2.91407 | 0.002415 | 0.998073 | NA |
| 20142 | RETNLB     | 0.009387947 | 0.007037541 | 2.91407 | 0.002415 | 0.998073 | NA |
| 20161 | SCGB1D1    | 0.009546756 | 0.007037541 | 2.91407 | 0.002415 | 0.998073 | NA |
| 20181 | SNORA11E   | 0.009387947 | 0.007037541 | 2.91407 | 0.002415 | 0.998073 | NA |
| 20201 | SNORA45    | 0.009387947 | 0.007037541 | 2.91407 | 0.002415 | 0.998073 | NA |
| 20442 | SPZ1       | 0.009387947 | 0.007037541 | 2.91407 | 0.002415 | 0.998073 | NA |

|       |           |             |             |          |          |          |          |
|-------|-----------|-------------|-------------|----------|----------|----------|----------|
| 20446 | SYCN      | 0.009546756 | 0.007037541 | 2.91407  | 0.002415 | 0.998073 | NA       |
| 20458 | TLX3      | 0.00914858  | 0.007037541 | 2.91407  | 0.002415 | 0.998073 | NA       |
| 20485 | TTY5      | 0.009387947 | 0.007037541 | 2.91407  | 0.002415 | 0.998073 | NA       |
| 18929 | SDCCAG3   | 563.2532322 | 0.006955368 | 0.111556 | 0.062349 | 0.950285 | 0.986718 |
| 18799 | ARL2BP    | 2524.820016 | 0.006817174 | 0.099321 | 0.068638 | 0.945278 | 0.985142 |
| 18981 | KRCC1     | 890.398742  | 0.006741122 | 0.125259 | 0.053818 | 0.957081 | 0.988343 |
| 19366 | OR52N4    | 4.874695278 | 0.006733236 | 0.355016 | 0.018966 | 0.984868 | 0.994878 |
| 18785 | ZFP90     | 656.3928909 | 0.006731661 | 0.093764 | 0.071794 | 0.942766 | 0.983719 |
| 19243 | NR5A2     | 165.0918793 | 0.006709341 | 0.203975 | 0.032893 | 0.97376  | 0.991876 |
| 18869 | KCTD7     | 434.4335633 | 0.006618771 | 0.107815 | 0.06139  | 0.951048 | 0.986718 |
| 18990 | DC1001295 | 233.6277673 | 0.006502757 | 0.124034 | 0.052427 | 0.958188 | 0.989018 |
| 19157 | RAD51L1   | 60.84531887 | 0.006502133 | 0.145055 | 0.044825 | 0.964247 | 0.989949 |
| 19024 | CTCFL     | 8.179602675 | 0.006443278 | 0.138019 | 0.046684 | 0.962765 | 0.989949 |
| 19415 | TKTL1     | 4.068589117 | 0.006435233 | 0.309867 | 0.020768 | 0.983431 | 0.994878 |
| 19199 | TMEM111   | 985.0296346 | 0.006258603 | 0.135494 | 0.046191 | 0.963158 | 0.989949 |
| 18812 | PI4KB     | 1674.502629 | 0.005916471 | 0.086573 | 0.068341 | 0.945514 | 0.985171 |
| 19245 | FAM57A    | 573.5627008 | 0.005897429 | 0.183751 | 0.032095 | 0.974397 | 0.99237  |
| 18951 | TCP1      | 3154.973847 | 0.005808139 | 0.092793 | 0.062592 | 0.950091 | 0.986718 |
| 18930 | SFT2D1    | 387.2866019 | 0.005550191 | 0.086448 | 0.064203 | 0.948809 | 0.986718 |
| 18829 | BAZ2A     | 2733.96537  | 0.005491972 | 0.087893 | 0.062485 | 0.950177 | 0.986718 |
| 19303 | FAT3      | 56.53745625 | 0.005461367 | 0.30121  | 0.018131 | 0.985534 | 0.994878 |
| 19312 | GPRC5D    | 4.011251065 | 0.005398681 | 0.302162 | 0.017867 | 0.985745 | 0.994878 |
| 19282 | C1orf104  | 63.83021766 | 0.005271468 | 0.221292 | 0.023821 | 0.980995 | 0.994878 |
| 19345 | CRNA0020  | 829.6935184 | 0.005249884 | 0.221958 | 0.023653 | 0.98113  | 0.994878 |
| 19068 | DC1000096 | 97.37320856 | 0.005018309 | 0.120674 | 0.041586 | 0.966829 | 0.989949 |
| 19261 | ZNF93     | 57.30835343 | 0.004960695 | 0.167971 | 0.029533 | 0.976439 | 0.993693 |
| 18949 | TCEB3     | 1070.232307 | 0.00487099  | 0.075386 | 0.064614 | 0.948481 | 0.986718 |
| 19534 | OR56B1    | 0.868752369 | 0.004813031 | 0.521346 | 0.009232 | 0.992634 | 0.998328 |
| 19391 | SEMA6C    | 237.767461  | 0.004762617 | 0.188714 | 0.025237 | 0.979866 | 0.994878 |
| 18786 | ARF3      | 5661.532338 | 0.004672991 | 0.065597 | 0.071238 | 0.943208 | 0.984062 |
| 19248 | PARP3     | 450.9950747 | 0.004582854 | 0.149526 | 0.030649 | 0.975549 | 0.99344  |
| 19251 | CREG1     | 4015.08931  | 0.004580805 | 0.153444 | 0.029853 | 0.976184 | 0.993674 |
| 19273 | ANKRD44   | 140.1307503 | 0.004561083 | 0.192941 | 0.02364  | 0.98114  | 0.994878 |
| 19253 | PRKDC     | 2636.915631 | 0.004501998 | 0.150052 | 0.030003 | 0.976065 | 0.993674 |
| 19270 | BCAR1     | 2228.402451 | 0.004474996 | 0.159491 | 0.028058 | 0.977616 | 0.994408 |
| 19195 | TAF5      | 87.18489629 | 0.004378076 | 0.108556 | 0.04033  | 0.96783  | 0.989949 |
| 19428 | ZNF876P   | 15.25306939 | 0.004341954 | 0.180769 | 0.024019 | 0.980837 | 0.994878 |
| 19256 | TIA1      | 1348.281521 | 0.004176269 | 0.138499 | 0.030154 | 0.975944 | 0.993674 |
| 19450 | G6GALNA3  | 3.689943135 | 0.003805726 | 0.308304 | 0.012344 | 0.990151 | 0.997858 |
| 19430 | CA11      | 189.4102449 | 0.003802983 | 0.224724 | 0.016923 | 0.986498 | 0.995155 |
| 19406 | SREBF1    | 2189.583921 | 0.003776907 | 0.186418 | 0.02026  | 0.983836 | 0.994878 |
| 19547 | PCDHA11   | 51.64975054 | 0.003729882 | 0.432681 | 0.00862  | 0.993122 | 0.998328 |
| 19493 | HRNR      | 29.11461087 | 0.003568621 | 0.333525 | 0.0107   | 0.991463 | 0.998328 |
| 19269 | AHI1      | 260.499614  | 0.003375918 | 0.119647 | 0.028216 | 0.97749  | 0.994332 |
| 19551 | PEG3AS    | 0.644141608 | 0.003044734 | 0.536831 | 0.005672 | 0.995475 | 0.998328 |
| 19412 | TASP1     | 164.402592  | 0.003035491 | 0.112075 | 0.027084 | 0.978392 | 0.994878 |
| 19439 | DC1001309 | 10.4266765  | 0.00297803  | 0.199298 | 0.014943 | 0.988078 | 0.996312 |

|       |          |             |              |          |           |          |          |
|-------|----------|-------------|--------------|----------|-----------|----------|----------|
| 19474 | FAM157A  | 8.059767583 | 0.002961558  | 0.283568 | 0.010444  | 0.991667 | 0.998328 |
| 19278 | BNIP2    | 881.944188  | 0.002950001  | 0.123747 | 0.023839  | 0.980981 | 0.994878 |
| 19490 | GUCY2C   | 3.488892885 | 0.002888259  | 0.286173 | 0.010093  | 0.991947 | 0.998328 |
| 19000 | ARHGAP17 | 1231.470299 | 0.002877779  | 0.075058 | 0.038341  | 0.969416 | 0.989949 |
| 19454 | PKD1L1   | 15.44194473 | 0.002863914  | 0.246179 | 0.011633  | 0.990718 | 0.998204 |
| 19262 | C19orf52 | 196.7232099 | 0.00276426   | 0.094576 | 0.029228  | 0.976683 | 0.993872 |
| 19218 | SF3B2    | 3614.300279 | 0.002738425  | 0.074823 | 0.036598  | 0.970805 | 0.990153 |
| 19324 | IMP3     | 1209.104961 | 0.002727988  | 0.107031 | 0.025488  | 0.979666 | 0.994878 |
| 19343 | NAAA     | 573.2430371 | 0.002714095  | 0.132191 | 0.020532  | 0.983619 | 0.994878 |
| 19589 | UGT1A6   | 5282.48608  | 0.002655115  | 0.382756 | 0.006937  | 0.994465 | 0.998328 |
| 19432 | DDT      | 903.3059188 | 0.002463681  | 0.151501 | 0.016262  | 0.987026 | 0.99561  |
| 19275 | ATXN7L1  | 290.6785739 | 0.002448031  | 0.106465 | 0.022994  | 0.981655 | 0.994878 |
| 19337 | LPGAT1   | 2271.606948 | 0.002403134  | 0.124323 | 0.01933   | 0.984578 | 0.994878 |
| 19443 | KIAA1407 | 212.4228331 | 0.002313648  | 0.165369 | 0.013991  | 0.988837 | 0.996873 |
| 19342 | MAP2K7   | 775.9092207 | 0.002286902  | 0.109098 | 0.020962  | 0.983276 | 0.994878 |
| 19426 | ZNF324B  | 94.26443092 | 0.002262959  | 0.092418 | 0.024486  | 0.980465 | 0.994878 |
| 19447 | A4GALT   | 1183.079668 | 0.00226073   | 0.18093  | 0.012495  | 0.990031 | 0.997819 |
| 19387 | RNF44    | 1359.287718 | 0.002202385  | 0.10046  | 0.021923  | 0.982509 | 0.994878 |
| 19485 | GOLGA2B  | 206.9293721 | 0.002085238  | 0.256585 | 0.008127  | 0.993516 | 0.998328 |
| 19458 | ATHL1    | 2022.64646  | 0.002034874  | 0.356156 | 0.005713  | 0.995441 | 0.998328 |
| 19593 | WDR27    | 128.0593596 | 0.001838564  | 0.218555 | 0.008412  | 0.993288 | 0.998328 |
| 19349 | NOL10    | 626.1684999 | 0.001739859  | 0.073601 | 0.023639  | 0.981141 | 0.994878 |
| 19435 | MED12    | 979.4686546 | 0.001630281  | 0.102311 | 0.015935  | 0.987287 | 0.995719 |
| 19279 | BTBD10   | 573.6935165 | 0.001627295  | 0.093729 | 0.017362  | 0.986148 | 0.994878 |
| 19330 | KTI12    | 174.3421718 | 0.001618705  | 0.091994 | 0.017596  | 0.985961 | 0.994878 |
| 19448 | KIAA0467 | 890.724761  | 0.001602722  | 0.127626 | 0.012558  | 0.98998  | 0.997819 |
| 19549 | PCDHGA10 | 96.19802102 | 0.001416108  | 0.323434 | 0.004378  | 0.996507 | 0.998328 |
| 19478 | FLJ42627 | 55.91311107 | 0.001335501  | 0.174279 | 0.007663  | 0.993886 | 0.998328 |
| 19586 | TRPC6    | 144.1704842 | 0.001233922  | 0.234997 | 0.005251  | 0.99581  | 0.998328 |
| 19452 | GCC1     | 593.6247301 | 0.001231216  | 0.102867 | 0.011969  | 0.99045  | 0.998029 |
| 19444 | RBM4B    | 255.007031  | 0.001203211  | 0.087908 | 0.013687  | 0.98908  | 0.997036 |
| 19572 | SLC9A3R2 | 1685.88133  | 0.001070628  | 0.232345 | 0.004608  | 0.996323 | 0.998328 |
| 19518 | NLRX1    | 510.1305936 | 0.00097217   | 0.108891 | 0.008928  | 0.992877 | 0.998328 |
| 19438 | C10orf76 | 645.9371226 | 0.000882995  | 0.058825 | 0.01501   | 0.988024 | 0.996309 |
| 19503 | KIAA1919 | 212.7648942 | 0.000713549  | 0.141874 | 0.005029  | 0.995987 | 0.998328 |
| 19514 | MMP24    | 1272.428877 | 0.000642075  | 0.209467 | 0.003065  | 0.997554 | 0.998328 |
| 19473 | CYSLTR1  | 57.80957414 | 0.000543113  | 0.21233  | 0.002558  | 0.997959 | 0.998328 |
| 19598 | RERG     | 1078.524329 | 0.000506191  | 0.25215  | 0.002007  | 0.998398 | 0.998551 |
| 19469 | COX4NB   | 448.9453532 | 0.000467519  | 0.084603 | 0.005526  | 0.995591 | 0.998328 |
| 19601 | IDH3B    | 1688.355076 | 6.87E-05     | 0.107116 | 0.000642  | 0.999488 | 0.999488 |
| 19602 | ACTL6B   | 0           | 0            | 0        | 0         | 1        | NA       |
| 19738 | GAGE12D  | 0           | 0            | 0        | 0         | 1        | NA       |
| 19740 | GAGE12J  | 0           | 0            | 0        | 0         | 1        | NA       |
| 19742 | GAGE2B   | 0           | 0            | 0        | 0         | 1        | NA       |
| 19599 | NIP7     | 572.826337  | -0.000167825 | 0.095021 | -0.001766 | 0.998591 | 0.998693 |
| 19600 | SEC23A   | 1863.846145 | -0.000182543 | 0.158884 | -0.001149 | 0.999083 | 0.999134 |
| 19597 | SMARCB1  | 1323.346742 | -0.000210609 | 0.099279 | -0.002121 | 0.998307 | 0.998511 |

|       |           |             |              |          |           |          |          |
|-------|-----------|-------------|--------------|----------|-----------|----------|----------|
| 19566 | RPF1      | 505.1202062 | -0.000430167 | 0.099136 | -0.004339 | 0.996538 | 0.998328 |
| 19519 | NUP205    | 1152.258319 | -0.000723111 | 0.11981  | -0.006035 | 0.995184 | 0.998328 |
| 19595 | ZDHHC4    | 1031.801594 | -0.000784856 | 0.107206 | -0.007321 | 0.994159 | 0.998328 |
| 19481 | GIMAP5    | 1109.893834 | -0.000812693 | 0.18905  | -0.004299 | 0.99657  | 0.998328 |
| 19545 | PARP9     | 1598.101721 | -0.000931705 | 0.12614  | -0.007386 | 0.994107 | 0.998328 |
| 19571 | SLC22A16  | 2.801363715 | -0.000987143 | 0.370003 | -0.002668 | 0.997871 | 0.998328 |
| 19445 | TMEM85    | 1473.977062 | -0.001034201 | 0.07571  | -0.01366  | 0.989101 | 0.997036 |
| 19548 | PCDHA6    | 46.37063102 | -0.001328961 | 0.274523 | -0.004841 | 0.996137 | 0.998328 |
| 19441 | GEMIN4    | 365.0600134 | -0.001412204 | 0.099139 | -0.014245 | 0.988635 | 0.996771 |
| 19433 | NSD1      | 1700.96857  | -0.00147293  | 0.091369 | -0.016121 | 0.987138 | 0.995672 |
| 19453 | MRPS18A   | 683.9879012 | -0.001644469 | 0.138012 | -0.011915 | 0.990493 | 0.998029 |
| 19434 | CAMTA2    | 1000.399036 | -0.001889069 | 0.118176 | -0.015985 | 0.987246 | 0.995719 |
| 19309 | GDI2      | 5781.410368 | -0.00209779  | 0.117681 | -0.017826 | 0.985778 | 0.994878 |
| 19315 | GTPBP4    | 720.6728148 | -0.002124315 | 0.082059 | -0.025888 | 0.979347 | 0.994878 |
| 19446 | MAPRE3    | 451.1814742 | -0.002134922 | 0.168604 | -0.012662 | 0.989897 | 0.997787 |
| 19437 | C7orf28B  | 592.3061931 | -0.002250663 | 0.147715 | -0.015236 | 0.987844 | 0.996178 |
| 19258 | E2F6      | 284.5300196 | -0.002397795 | 0.080605 | -0.029748 | 0.976268 | 0.993693 |
| 19436 | FLJ39653  | 82.38823497 | -0.002438324 | 0.158079 | -0.015425 | 0.987693 | 0.996078 |
| 19380 | PQLC3     | 783.3307539 | -0.002484767 | 0.133755 | -0.018577 | 0.985179 | 0.994878 |
| 19339 | MAFG      | 648.7906032 | -0.002507043 | 0.118238 | -0.021203 | 0.983083 | 0.994878 |
| 19295 | CRIPAK    | 249.1676273 | -0.002547184 | 0.142382 | -0.01789  | 0.985727 | 0.994878 |
| 19314 | GTF3C1    | 1873.938526 | -0.002563872 | 0.109551 | -0.023403 | 0.981329 | 0.994878 |
| 19220 | DNAJC14   | 1156.051294 | -0.002655131 | 0.072903 | -0.03642  | 0.970947 | 0.990194 |
| 19236 | DEM1      | 124.8821655 | -0.002877546 | 0.084134 | -0.034202 | 0.972716 | 0.991173 |
| 19160 | RFWD2     | 675.3664683 | -0.003110357 | 0.075481 | -0.041207 | 0.967131 | 0.989949 |
| 19285 | C9orf86   | 1664.921792 | -0.003281548 | 0.153672 | -0.021354 | 0.982963 | 0.994878 |
| 19392 | SIN3B     | 1055.679107 | -0.003317566 | 0.121758 | -0.027247 | 0.978263 | 0.994878 |
| 19451 | C2CD4C    | 39.09957997 | -0.003356644 | 0.277872 | -0.01208  | 0.990362 | 0.997999 |
| 19293 | CLDND1    | 1586.42234  | -0.003475201 | 0.130582 | -0.026613 | 0.978768 | 0.994878 |
| 19562 | psiTPTE22 | 86.32787973 | -0.003593924 | 0.363405 | -0.00989  | 0.992109 | 0.998328 |
| 19188 | SPG21     | 1944.294176 | -0.00361874  | 0.071822 | -0.050385 | 0.959816 | 0.989949 |
| 19005 | BRF2      | 287.6755759 | -0.004024286 | 0.105946 | -0.037984 | 0.9697   | 0.989949 |
| 19442 | PRSS16    | 267.4105971 | -0.004238363 | 0.300397 | -0.014109 | 0.988743 | 0.996829 |
| 19238 | NDST1     | 3191.132242 | -0.004373762 | 0.129122 | -0.033873 | 0.972978 | 0.991337 |
| 19231 | ZNF167    | 58.5452218  | -0.004437126 | 0.126791 | -0.034996 | 0.972083 | 0.990786 |
| 19268 | ATP2B1    | 1115.75129  | -0.004580551 | 0.160156 | -0.028601 | 0.977183 | 0.994071 |
| 19234 | CLN6      | 1218.983494 | -0.005009402 | 0.145266 | -0.034484 | 0.972491 | 0.990995 |
| 19240 | C6orf192  | 375.6097412 | -0.005072484 | 0.150603 | -0.033681 | 0.973131 | 0.99139  |
| 19305 | FLJ10213  | 12.13262816 | -0.005137154 | 0.205629 | -0.024983 | 0.980069 | 0.994878 |
| 19252 | PDGFB     | 1102.105965 | -0.005175164 | 0.173219 | -0.029876 | 0.976166 | 0.993674 |
| 18965 | ERH       | 1425.559747 | -0.005339636 | 0.094483 | -0.056514 | 0.954932 | 0.986956 |
| 19222 | C2orf74   | 324.820066  | -0.00535801  | 0.150432 | -0.035618 | 0.971587 | 0.990696 |
| 19028 | DENND1A   | 822.1413511 | -0.005382344 | 0.120299 | -0.044741 | 0.964314 | 0.989949 |
| 19162 | RHOQ      | 2537.202423 | -0.005402436 | 0.141177 | -0.038267 | 0.969475 | 0.989949 |
| 18992 | GCN1L1    | 2280.930037 | -0.00554418  | 0.107355 | -0.051643 | 0.958813 | 0.989558 |
| 18972 | PSME4     | 1243.959523 | -0.005796823 | 0.104709 | -0.055361 | 0.95585  | 0.98755  |
| 18848 | DAD1      | 2346.759857 | -0.005823125 | 0.098809 | -0.058933 | 0.953005 | 0.986718 |



|       |           |             |              |          |           |          |          |
|-------|-----------|-------------|--------------|----------|-----------|----------|----------|
| 19226 | CCDC56    | 1620.866319 | -0.006201725 | 0.175593 | -0.035319 | 0.971826 | 0.990697 |
| 18888 | MAP3K3    | 961.2535473 | -0.006306932 | 0.100135 | -0.062985 | 0.949779 | 0.986718 |
| 19239 | MTSS1L    | 852.6895815 | -0.006467721 | 0.191479 | -0.033778 | 0.973054 | 0.991363 |
| 18918 | PPP1CC    | 3232.957703 | -0.006600586 | 0.113719 | -0.058043 | 0.953714 | 0.986718 |
| 19018 | CDC42EP2  | 195.0264296 | -0.00668417  | 0.172466 | -0.038756 | 0.969085 | 0.989949 |
| 18978 | SIPAIL3   | 988.4952273 | -0.00681778  | 0.124016 | -0.054975 | 0.956158 | 0.987637 |
| 19173 | SMAD7     | 829.9087261 | -0.006874354 | 0.157402 | -0.043674 | 0.965164 | 0.989949 |
| 19001 | B9D1      | 264.0472791 | -0.006885905 | 0.181    | -0.038044 | 0.969653 | 0.989949 |
| 19388 | RSPO3     | 52.26863469 | -0.006970241 | 0.335932 | -0.020749 | 0.983446 | 0.994878 |
| 18649 | CSRNP2    | 794.1674562 | -0.006976388 | 0.078659 | -0.088692 | 0.929327 | 0.976767 |
| 18807 | RWDD1     | 921.0972488 | -0.007304433 | 0.105658 | -0.069133 | 0.944884 | 0.985142 |
| 18852 | ERGIC2    | 787.2947056 | -0.007357289 | 0.120271 | -0.061172 | 0.951222 | 0.986718 |
| 18645 | CRCP      | 829.6142865 | -0.007394169 | 0.083065 | -0.089016 | 0.929069 | 0.976665 |
| 19228 | ZNF395    | 8294.441566 | -0.007712225 | 0.218503 | -0.035296 | 0.971844 | 0.990697 |
| 18788 | SNX15     | 443.7560496 | -0.007823146 | 0.109705 | -0.07131  | 0.943151 | 0.984062 |
| 19092 | NQO2      | 1051.73475  | -0.007824874 | 0.163042 | -0.047993 | 0.961722 | 0.989949 |
| 19221 | ANKS1B    | 111.2790181 | -0.007830735 | 0.217623 | -0.035983 | 0.971296 | 0.990498 |
| 18566 | UBAP2L    | 2549.344118 | -0.008064934 | 0.080639 | -0.100013 | 0.920334 | 0.97165  |
| 18741 | STAT6     | 4997.835994 | -0.008140331 | 0.106089 | -0.076731 | 0.938837 | 0.981752 |
| 19170 | SH3TC1    | 1224.473021 | -0.008159127 | 0.16351  | -0.0499   | 0.960202 | 0.989949 |
| 19325 | KCNH2     | 111.0375942 | -0.008198102 | 0.4353   | -0.018833 | 0.984974 | 0.994878 |
| 19159 | RBMS3     | 81.37703103 | -0.008327464 | 0.221706 | -0.037561 | 0.970038 | 0.989949 |
| 19141 | PCDHB12   | 77.45462351 | -0.008379416 | 0.214378 | -0.039087 | 0.968821 | 0.989949 |
| 18970 | SCHIP1    | 455.1215799 | -0.008515644 | 0.153186 | -0.05559  | 0.955668 | 0.987457 |
| 19013 | C2orf55   | 230.0024034 | -0.00857193  | 0.193932 | -0.044201 | 0.964744 | 0.989949 |
| 18784 | DCP2      | 892.2403892 | -0.008644364 | 0.120325 | -0.071842 | 0.942728 | 0.983719 |
| 18775 | TM2D3     | 993.7934282 | -0.008720761 | 0.118533 | -0.073572 | 0.941351 | 0.982718 |
| 19247 | ESR2      | 17.02067681 | -0.008733553 | 0.278881 | -0.031316 | 0.975017 | 0.99295  |
| 19200 | TNFSF10   | 5560.407983 | -0.008807999 | 0.230281 | -0.038249 | 0.969489 | 0.989949 |
| 19056 | KCNK7     | 5.921250559 | -0.008845793 | 0.226775 | -0.039007 | 0.968885 | 0.989949 |
| 18927 | RTKN      | 1242.063809 | -0.009022126 | 0.147846 | -0.061024 | 0.95134  | 0.986718 |
| 18824 | ADAT2     | 102.9144293 | -0.009029096 | 0.153396 | -0.058862 | 0.953062 | 0.986718 |
| 18931 | SFXN4     | 571.2238116 | -0.009293908 | 0.156729 | -0.059299 | 0.952714 | 0.986718 |
| 19310 | GLOD5     | 13.08982565 | -0.009430988 | 0.397008 | -0.023755 | 0.981048 | 0.994878 |
| 18541 | RPUSD4    | 435.2153316 | -0.009740231 | 0.094831 | -0.102712 | 0.918192 | 0.970735 |
| 18451 | HARS2     | 794.7393332 | -0.009760682 | 0.08132  | -0.120028 | 0.904461 | 0.960833 |
| 18607 | TMEM107   | 222.3741161 | -0.009824502 | 0.101207 | -0.097073 | 0.922668 | 0.972284 |
| 19233 | DCAF4L1   | 9.45450325  | -0.009839651 | 0.283798 | -0.034671 | 0.972342 | 0.99099  |
| 19146 | PPARGC1E  | 24.22953593 | -0.009898312 | 0.206282 | -0.047984 | 0.961729 | 0.989949 |
| 18661 | KIF9      | 90.96295496 | -0.009918473 | 0.115925 | -0.08556  | 0.931817 | 0.978754 |
| 18602 | RPS6KC1   | 428.5047598 | -0.010079327 | 0.104191 | -0.096739 | 0.922933 | 0.972284 |
| 18631 | NIT1      | 838.1560837 | -0.010539207 | 0.115991 | -0.090862 | 0.927602 | 0.975853 |
| 19431 | FLJ44054  | 0.85296285  | -0.010584176 | 0.626646 | -0.01689  | 0.986524 | 0.995155 |
| 18521 | ACIN1     | 2236.985671 | -0.010676324 | 0.100396 | -0.106342 | 0.915311 | 0.968685 |
| 18480 | GMEB1     | 116.3409791 | -0.010783419 | 0.094082 | -0.114617 | 0.908748 | 0.963873 |
| 19074 | LOC541473 | 4.187170202 | -0.010810783 | 0.245159 | -0.044097 | 0.964827 | 0.989949 |
| 18648 | GPATCH4   | 423.0251351 | -0.010993219 | 0.123798 | -0.0888   | 0.929241 | 0.97673  |

|       |           |             |              |          |           |          |          |
|-------|-----------|-------------|--------------|----------|-----------|----------|----------|
| 18861 | HOXA10    | 581.6078876 | -0.011071506 | 0.185204 | -0.05978  | 0.952331 | 0.986718 |
| 19241 | STX19     | 1.58863875  | -0.011211266 | 0.334284 | -0.033538 | 0.973245 | 0.991455 |
| 18969 | PNMAL2    | 40.79471451 | -0.011211963 | 0.201439 | -0.055659 | 0.955613 | 0.987452 |
| 19232 | ACPP      | 22.41364832 | -0.011240781 | 0.324716 | -0.034617 | 0.972385 | 0.99099  |
| 19032 | EFCAB5    | 4.203755594 | -0.011379517 | 0.25292  | -0.044993 | 0.964113 | 0.989949 |
| 19264 | C7orf71   | 0.707393787 | -0.011579827 | 0.401594 | -0.028835 | 0.976996 | 0.993972 |
| 18534 | TTF2      | 227.4919375 | -0.011664346 | 0.112605 | -0.103587 | 0.917497 | 0.970344 |
| 19185 | SOX5      | 35.44964721 | -0.011826715 | 0.254202 | -0.046525 | 0.962892 | 0.989949 |
| 18779 | ZNF107    | 223.2361539 | -0.011961377 | 0.163619 | -0.073105 | 0.941722 | 0.982944 |
| 18655 | YIPF5     | 1511.329191 | -0.012043906 | 0.13752  | -0.087579 | 0.930211 | 0.977382 |
| 19237 | RAB27B    | 17.11666053 | -0.012114624 | 0.35572  | -0.034057 | 0.972832 | 0.99124  |
| 18702 | DOCK7     | 785.8386534 | -0.012139964 | 0.149846 | -0.081016 | 0.935429 | 0.980395 |
| 18394 | GAR1      | 308.3264144 | -0.012218233 | 0.094141 | -0.129786 | 0.896736 | 0.955579 |
| 18621 | FAM111A   | 1006.261146 | -0.012298755 | 0.131416 | -0.093586 | 0.925438 | 0.974143 |
| 18377 | TFB1M     | 161.1571183 | -0.012339285 | 0.092725 | -0.133075 | 0.894134 | 0.953769 |
| 18501 | POLR1C    | 339.2444087 | -0.012450434 | 0.111651 | -0.111512 | 0.91121  | 0.965387 |
| 18630 | PARD3     | 989.2223712 | -0.012487009 | 0.137004 | -0.091143 | 0.927379 | 0.975714 |
| 18868 | KCNK1     | 491.8088673 | -0.012727692 | 0.200783 | -0.06339  | 0.949456 | 0.986718 |
| 18804 | CIDEB     | 1133.690999 | -0.01314532  | 0.191597 | -0.068609 | 0.945301 | 0.985142 |
| 18820 | FLJ44606  | 34.81291727 | -0.013167764 | 0.198777 | -0.066244 | 0.947184 | 0.986438 |
| 18458 | DPY30     | 693.6956616 | -0.013338735 | 0.113396 | -0.117629 | 0.906361 | 0.962435 |
| 18222 | HNRNPM    | 2976.384563 | -0.01369757  | 0.086929 | -0.157573 | 0.874794 | 0.940984 |
| 18511 | DHRS1     | 369.943193  | -0.013731677 | 0.126661 | -0.108413 | 0.913668 | 0.967469 |
| 18388 | KDM5C     | 2222.882365 | -0.013802932 | 0.105325 | -0.13105  | 0.895735 | 0.954824 |
| 17980 | ZNF498    | 392.4065177 | -0.014034758 | 0.06714  | -0.209036 | 0.83442  | 0.909678 |
| 18432 | HDDC2     | 908.2449373 | -0.014037114 | 0.113795 | -0.123354 | 0.901826 | 0.95897  |
| 18152 | C15orf24  | 1511.433046 | -0.01420929  | 0.081547 | -0.174248 | 0.861671 | 0.930455 |
| 18241 | ZNF576    | 200.0242089 | -0.014284656 | 0.091334 | -0.1564   | 0.875718 | 0.941374 |
| 19286 | CAPN8     | 2.988390632 | -0.014476678 | 0.582413 | -0.024856 | 0.98017  | 0.994878 |
| 18671 | ACCS      | 348.1275509 | -0.014488004 | 0.175559 | -0.082525 | 0.934229 | 0.979957 |
| 18805 | CPM       | 1734.232348 | -0.014528767 | 0.209893 | -0.06922  | 0.944815 | 0.985142 |
| 18828 | AVIL      | 38.69637556 | -0.01455563  | 0.251614 | -0.057849 | 0.953869 | 0.986718 |
| 18674 | C18orf1   | 805.3438672 | -0.014805629 | 0.181431 | -0.081605 | 0.934961 | 0.979957 |
| 18528 | C1orf93   | 851.845474  | -0.014859583 | 0.142799 | -0.10406  | 0.917122 | 0.970184 |
| 18401 | LACTB     | 525.8036601 | -0.014867146 | 0.115805 | -0.128381 | 0.897847 | 0.956399 |
| 18047 | R3HDM2    | 1323.709632 | -0.015110919 | 0.076612 | -0.197239 | 0.84364  | 0.916285 |
| 18643 | C1orf183  | 81.1004467  | -0.015131942 | 0.169505 | -0.089272 | 0.928866 | 0.976665 |
| 18802 | C1orf63   | 577.4399806 | -0.015192294 | 0.219815 | -0.069114 | 0.944899 | 0.985142 |
| 18382 | UNKL      | 228.9352705 | -0.015379655 | 0.116503 | -0.132011 | 0.894976 | 0.954326 |
| 18105 | SAP130    | 577.2231769 | -0.015477936 | 0.084972 | -0.182153 | 0.855463 | 0.926149 |
| 18537 | ZNF814    | 276.6051397 | -0.015499665 | 0.150331 | -0.103104 | 0.917881 | 0.970566 |
| 18683 | LOC144486 | 8.121421214 | -0.015547092 | 0.188777 | -0.082357 | 0.934363 | 0.979957 |
| 18167 | SP1       | 3271.033391 | -0.015645947 | 0.091401 | -0.171179 | 0.864083 | 0.932331 |
| 18177 | EED       | 301.0058375 | -0.015731712 | 0.093654 | -0.167977 | 0.866601 | 0.934491 |
| 18510 | FLJ37453  | 76.68203886 | -0.015749786 | 0.144876 | -0.108712 | 0.913431 | 0.967269 |
| 18678 | FAM100A   | 396.5866658 | -0.015904657 | 0.191789 | -0.082928 | 0.933909 | 0.979957 |
| 18620 | BHLHE40   | 7550.085533 | -0.0159841   | 0.169651 | -0.094217 | 0.924937 | 0.973667 |

|       |           |             |              |          |           |          |          |
|-------|-----------|-------------|--------------|----------|-----------|----------|----------|
| 17928 | RNF4      | 1424.683889 | -0.016008513 | 0.071727 | -0.223185 | 0.823391 | 0.900318 |
| 18267 | MYO1C     | 5390.352553 | -0.016141077 | 0.108087 | -0.149335 | 0.88129  | 0.945648 |
| 18248 | SETD4     | 302.2280918 | -0.016334258 | 0.106125 | -0.153915 | 0.877676 | 0.942764 |
| 18223 | ZNF805    | 341.7705918 | -0.016365517 | 0.103891 | -0.157525 | 0.874831 | 0.940984 |
| 18221 | COG1      | 892.5358148 | -0.016554031 | 0.104871 | -0.157852 | 0.874574 | 0.940811 |
| 18568 | C7orf23   | 857.376653  | -0.016577559 | 0.166345 | -0.099658 | 0.920616 | 0.971781 |
| 18003 | ADAR      | 6232.921988 | -0.016673057 | 0.081195 | -0.205346 | 0.837302 | 0.911623 |
| 18410 | DNAJC15   | 843.1868082 | -0.016712887 | 0.132089 | -0.126528 | 0.899314 | 0.957585 |
| 18668 | OR2A7     | 140.7140324 | -0.016804949 | 0.199891 | -0.084071 | 0.933    | 0.97963  |
| 17988 | ZNF764    | 192.8563085 | -0.016957492 | 0.081785 | -0.207341 | 0.835743 | 0.910743 |
| 18325 | RBMS1     | 1732.269777 | -0.016984885 | 0.121245 | -0.140088 | 0.888591 | 0.950465 |
| 18030 | ZNF346    | 267.4012112 | -0.017213648 | 0.0858   | -0.200626 | 0.840991 | 0.914466 |
| 19347 | NELL1     | 6.604213331 | -0.017274675 | 0.84114  | -0.020537 | 0.983615 | 0.994878 |
| 18708 | CMPK2     | 263.6703504 | -0.017312986 | 0.217163 | -0.079723 | 0.936457 | 0.981158 |
| 18062 | ARID1A    | 1659.595439 | -0.017360848 | 0.089518 | -0.193936 | 0.846226 | 0.918307 |
| 18651 | ELK3      | 646.392354  | -0.017531161 | 0.199079 | -0.088061 | 0.929828 | 0.977032 |
| 18237 | TOPBP1    | 654.6803514 | -0.01766026  | 0.112777 | -0.156595 | 0.875564 | 0.941374 |
| 18142 | BRD4      | 1529.286185 | -0.01773505  | 0.100864 | -0.175831 | 0.860427 | 0.929333 |
| 18324 | DUS2L     | 199.5970827 | -0.018027895 | 0.128646 | -0.140136 | 0.888553 | 0.950465 |
| 18369 | FUK       | 534.3379065 | -0.018094106 | 0.134188 | -0.134842 | 0.892737 | 0.952613 |
| 19296 | DCAF12L2  | 3.833027543 | -0.018178717 | 0.7556   | -0.024059 | 0.980806 | 0.994878 |
| 18295 | KDM4D     | 30.81859844 | -0.01824037  | 0.126071 | -0.144683 | 0.884961 | 0.948114 |
| 18257 | TNRC6C    | 352.3831008 | -0.01869929  | 0.124142 | -0.150629 | 0.880269 | 0.94507  |
| 17813 | ICMT      | 1925.134006 | -0.018769943 | 0.077012 | -0.243727 | 0.807443 | 0.888535 |
| 18029 | ERMAP     | 375.4194243 | -0.019003817 | 0.094832 | -0.200394 | 0.841173 | 0.914466 |
| 18731 | PCSK5     | 161.9918052 | -0.019010152 | 0.245697 | -0.077372 | 0.938327 | 0.981752 |
| 18436 | BET1      | 865.7841515 | -0.01919109  | 0.157136 | -0.12213  | 0.902796 | 0.959845 |
| 18916 | PCDHB6    | 135.1765504 | -0.019216436 | 0.321077 | -0.05985  | 0.952275 | 0.986718 |
| 18527 | ARAP3     | 745.7645276 | -0.01934053  | 0.18528  | -0.104385 | 0.916864 | 0.970014 |
| 18711 | LOC728743 | 249.2692189 | -0.019430816 | 0.245604 | -0.079114 | 0.936942 | 0.981508 |
| 18491 | RAB8B     | 1253.670848 | -0.019518814 | 0.172861 | -0.112916 | 0.910097 | 0.96463  |
| 18053 | ZNF263    | 665.1077954 | -0.019605198 | 0.100564 | -0.194953 | 0.84543  | 0.917923 |
| 18240 | UBE2D1    | 438.7075097 | -0.019606931 | 0.125648 | -0.156046 | 0.875997 | 0.941374 |
| 18181 | TRIM4     | 967.5560436 | -0.019622685 | 0.117211 | -0.167414 | 0.867045 | 0.934764 |
| 18150 | NAPB      | 276.315053  | -0.01987205  | 0.113749 | -0.1747   | 0.861315 | 0.930173 |
| 18411 | MAP2K3    | 1233.722018 | -0.019910053 | 0.157569 | -0.126358 | 0.899449 | 0.957585 |
| 18435 | PDF       | 230.9485076 | -0.020027668 | 0.163574 | -0.122438 | 0.902552 | 0.959638 |
| 18625 | SLC25A10  | 616.809617  | -0.02004645  | 0.215896 | -0.092852 | 0.926021 | 0.974547 |
| 18063 | GMEB2     | 424.1524686 | -0.020172722 | 0.104035 | -0.193903 | 0.846252 | 0.918307 |
| 18456 | ATP5G1    | 988.134885  | -0.020190751 | 0.171281 | -0.117881 | 0.906162 | 0.96238  |
| 18102 | TUT1      | 530.7266145 | -0.020225556 | 0.110053 | -0.183781 | 0.854185 | 0.924919 |
| 18884 | LOC374491 | 3.970260722 | -0.020341467 | 0.344562 | -0.059036 | 0.952924 | 0.986718 |
| 18032 | PIGS      | 1446.008279 | -0.020354375 | 0.102    | -0.199553 | 0.841831 | 0.91508  |
| 18195 | DOLPP1    | 221.0570809 | -0.020449234 | 0.125374 | -0.163105 | 0.870435 | 0.937697 |
| 18519 | KCNQ1OT1  | 179.1870984 | -0.02054355  | 0.191979 | -0.107009 | 0.914782 | 0.968229 |
| 18015 | C6orf106  | 3747.625423 | -0.020590688 | 0.101388 | -0.203088 | 0.839067 | 0.912885 |
| 18431 | TFEB      | 573.1622254 | -0.020824246 | 0.168359 | -0.12369  | 0.901561 | 0.958792 |

|       |           |             |              |          |           |          |          |
|-------|-----------|-------------|--------------|----------|-----------|----------|----------|
| 17589 | GTF3C2    | 1180.432242 | -0.021076169 | 0.071123 | -0.296332 | 0.766976 | 0.85471  |
| 17793 | MGAT2     | 875.6388361 | -0.021097865 | 0.085381 | -0.247102 | 0.804829 | 0.886576 |
| 18312 | USP13     | 376.8031974 | -0.021207393 | 0.149843 | -0.141531 | 0.887451 | 0.949919 |
| 18163 | TXN2      | 1779.861838 | -0.021321202 | 0.124267 | -0.171576 | 0.863771 | 0.932158 |
| 18540 | NEDD4     | 866.3596618 | -0.021348984 | 0.208022 | -0.102628 | 0.918258 | 0.970735 |
| 18125 | CA5BP     | 257.1314718 | -0.021366369 | 0.119606 | -0.17864  | 0.85822  | 0.928058 |
| 18310 | C4orf46   | 171.6545806 | -0.021445823 | 0.150987 | -0.142037 | 0.887051 | 0.949595 |
| 18599 | PLCH1     | 231.1636269 | -0.021462622 | 0.221844 | -0.096747 | 0.922928 | 0.972284 |
| 17923 | C10orf26  | 1842.727022 | -0.021709502 | 0.097018 | -0.223768 | 0.822938 | 0.899968 |
| 18199 | MRPL2     | 511.3432495 | -0.021726706 | 0.134194 | -0.161905 | 0.87138  | 0.938509 |
| 18157 | LOC348926 | 58.8838969  | -0.02178809  | 0.126063 | -0.172835 | 0.862781 | 0.931345 |
| 18046 | POLDIP2   | 2700.776349 | -0.022223421 | 0.11261  | -0.197349 | 0.843555 | 0.916243 |
| 18404 | PSTK      | 31.36050107 | -0.022272637 | 0.174776 | -0.127435 | 0.898596 | 0.957041 |
| 17906 | CXorf40B  | 396.2672    | -0.022363611 | 0.098427 | -0.227209 | 0.820261 | 0.897908 |
| 18454 | SYNJ2     | 307.6224536 | -0.022642956 | 0.19029  | -0.118992 | 0.905282 | 0.961549 |
| 18130 | MRPL4     | 684.204396  | -0.02266027  | 0.12714  | -0.17823  | 0.858542 | 0.928204 |
| 18366 | C8orf45   | 38.10595497 | -0.022683242 | 0.16757  | -0.135365 | 0.892323 | 0.952296 |
| 18120 | MEM194A   | 563.1178315 | -0.022724701 | 0.126105 | -0.180205 | 0.856992 | 0.927074 |
| 17990 | FAM98A    | 995.1284912 | -0.022757059 | 0.109915 | -0.207042 | 0.835977 | 0.910838 |
| 18365 | LOC401093 | 101.8129857 | -0.022815112 | 0.168356 | -0.135517 | 0.892203 | 0.952276 |
| 17641 | DDX47     | 962.9144117 | -0.022889016 | 0.08117  | -0.281988 | 0.777953 | 0.864387 |
| 19191 | SSTR5     | 2.960577257 | -0.022928855 | 0.616205 | -0.03721  | 0.970318 | 0.989949 |
| 17751 | SYS1      | 1438.309528 | -0.023282275 | 0.090868 | -0.256219 | 0.797781 | 0.880926 |
| 17772 | HGSNAT    | 2349.954829 | -0.023289583 | 0.092287 | -0.25236  | 0.800763 | 0.883173 |
| 18298 | ECSIT     | 932.7633809 | -0.023346217 | 0.162159 | -0.143971 | 0.885524 | 0.948582 |
| 18479 | LOC401127 | 6.030303853 | -0.023384398 | 0.203128 | -0.115122 | 0.908349 | 0.963501 |
| 18067 | C15orf41  | 130.2634381 | -0.023551881 | 0.122029 | -0.193003 | 0.846957 | 0.918834 |
| 18844 | CXorf48   | 0.90552434  | -0.023552529 | 0.379565 | -0.062051 | 0.950522 | 0.986718 |
| 17542 | YY1AP1    | 1316.57225  | -0.023590441 | 0.077506 | -0.304368 | 0.760848 | 0.850153 |
| 18335 | ABHD11    | 596.4816796 | -0.023669254 | 0.170439 | -0.138872 | 0.889551 | 0.950973 |
| 18346 | HEATR7A   | 509.6432437 | -0.023921883 | 0.175083 | -0.136632 | 0.891322 | 0.952033 |
| 18391 | BTN2A3    | 32.40051826 | -0.024010483 | 0.183659 | -0.130734 | 0.895986 | 0.954883 |
| 18642 | C10orf128 | 39.62794207 | -0.024113659 | 0.270939 | -0.089    | 0.929082 | 0.976665 |
| 18155 | C1orf201  | 167.1840691 | -0.024176601 | 0.139603 | -0.173181 | 0.862509 | 0.931206 |
| 18074 | CNNM4     | 518.0439909 | -0.024185883 | 0.12589  | -0.192118 | 0.847649 | 0.919213 |
| 18301 | NPC1      | 1876.968053 | -0.024249519 | 0.168897 | -0.143576 | 0.885835 | 0.94876  |
| 18261 | DDX60L    | 517.7545744 | -0.024296967 | 0.162334 | -0.149673 | 0.881023 | 0.945545 |
| 17692 | FDPS      | 1548.804949 | -0.024317821 | 0.090442 | -0.268878 | 0.788023 | 0.872954 |
| 17941 | TOMM40L   | 437.392882  | -0.024450961 | 0.111224 | -0.219835 | 0.826    | 0.902426 |
| 18773 | PPP1R14C  | 302.14254   | -0.024507401 | 0.332135 | -0.073787 | 0.94118  | 0.982691 |
| 17575 | APEX1     | 2416.313375 | -0.024549986 | 0.082293 | -0.298323 | 0.765457 | 0.853667 |
| 18036 | WDR60     | 708.1224514 | -0.024564193 | 0.123432 | -0.19901  | 0.842255 | 0.915338 |
| 18037 | ARAF      | 1257.616072 | -0.024928026 | 0.125391 | -0.198803 | 0.842417 | 0.91541  |
| 18772 | HFM1      | 3.113929964 | -0.024934453 | 0.337641 | -0.073849 | 0.941131 | 0.982691 |
| 18375 | FGGY      | 321.1207148 | -0.025153843 | 0.189156 | -0.132979 | 0.89421  | 0.953769 |
| 17875 | ARHGEF11  | 1009.141908 | -0.025212462 | 0.108937 | -0.23144  | 0.816973 | 0.895818 |
| 17837 | C11orf59  | 2003.296146 | -0.025408848 | 0.106795 | -0.237921 | 0.811942 | 0.892239 |

|       |           |             |              |          |           |          |          |
|-------|-----------|-------------|--------------|----------|-----------|----------|----------|
| 17510 | SLC25A14  | 131.7731689 | -0.025463155 | 0.081311 | -0.313157 | 0.754161 | 0.844221 |
| 18329 | LAPTM4B   | 2385.656682 | -0.025550819 | 0.183019 | -0.139607 | 0.88897  | 0.950653 |
| 18644 | CASQ1     | 3.260053711 | -0.025563834 | 0.286876 | -0.089111 | 0.928994 | 0.976665 |
| 18055 | TAF1A     | 51.05133914 | -0.025702015 | 0.131933 | -0.194811 | 0.845541 | 0.917943 |
| 17640 | SRPR      | 3780.045653 | -0.025778823 | 0.091322 | -0.282286 | 0.777725 | 0.864183 |
| 18274 | SMTN      | 1254.954676 | -0.025834844 | 0.174795 | -0.147801 | 0.8825   | 0.946592 |
| 18004 | SELK      | 606.0727586 | -0.025849709 | 0.125999 | -0.205159 | 0.837448 | 0.911731 |
| 17446 | PKNOX1    | 405.5463028 | -0.025905943 | 0.07911  | -0.327467 | 0.743315 | 0.835132 |
| 18025 | PACS2     | 1187.15528  | -0.026084847 | 0.129896 | -0.200813 | 0.840845 | 0.914363 |
| 18580 | CUZD1     | 24.47146386 | -0.02614232  | 0.270695 | -0.096575 | 0.923064 | 0.972284 |
| 17685 | NAA20     | 1195.326187 | -0.026168669 | 0.096304 | -0.27173  | 0.785829 | 0.870966 |
| 18416 | POLN      | 17.44659921 | -0.026358491 | 0.209302 | -0.125935 | 0.899783 | 0.957629 |
| 18379 | STAP2     | 703.8940592 | -0.026376083 | 0.198881 | -0.132623 | 0.894492 | 0.954011 |
| 18215 | SLC27A1   | 782.0483689 | -0.026682207 | 0.167821 | -0.158992 | 0.873675 | 0.940154 |
| 17876 | LAPTM4A   | 10277.66489 | -0.026833554 | 0.115947 | -0.23143  | 0.81698  | 0.895818 |
| 18429 | ZDHHC20   | 159.2179763 | -0.026943771 | 0.21746  | -0.123902 | 0.901393 | 0.958717 |
| 17483 | METTL13   | 607.4799663 | -0.027006557 | 0.084806 | -0.318452 | 0.750142 | 0.841019 |
| 17996 | DNAJC30   | 388.4392462 | -0.027098994 | 0.131301 | -0.206388 | 0.836488 | 0.911092 |
| 17285 | NKAP      | 330.7607773 | -0.027159496 | 0.073075 | -0.371668 | 0.71014  | 0.805291 |
| 17910 | RGMB      | 310.7002523 | -0.027180629 | 0.12018  | -0.226166 | 0.821072 | 0.898595 |
| 17975 | B4GALT5   | 3425.775047 | -0.027384178 | 0.129177 | -0.211989 | 0.832115 | 0.907388 |
| 18168 | XBP1      | 4324.058721 | -0.02768716  | 0.161848 | -0.171069 | 0.86417  | 0.932331 |
| 18449 | GVIN1     | 214.5443966 | -0.027718055 | 0.229798 | -0.120619 | 0.903992 | 0.96044  |
| 18963 | SYT16     | 1.886843031 | -0.027799821 | 0.489202 | -0.056827 | 0.954683 | 0.986803 |
| 17398 | UNK       | 636.3269407 | -0.028035923 | 0.081937 | -0.342165 | 0.732227 | 0.824944 |
| 17897 | SFRS12IP1 | 847.7895015 | -0.028217168 | 0.123562 | -0.228364 | 0.819363 | 0.897441 |
| 18968 | OCM       | 0.613674068 | -0.028251243 | 0.506676 | -0.055758 | 0.955535 | 0.987423 |
| 18113 | CKAP2     | 456.9620946 | -0.028308281 | 0.156242 | -0.181183 | 0.856224 | 0.926564 |
| 18794 | CLLU1     | 2.249862472 | -0.028371721 | 0.40344  | -0.070325 | 0.943935 | 0.984467 |
| 18259 | SCRN2     | 774.6071455 | -0.028386397 | 0.18894  | -0.15024  | 0.880575 | 0.945295 |
| 17609 | TP53RK    | 402.0845788 | -0.028418574 | 0.097331 | -0.29198  | 0.770302 | 0.857442 |
| 18512 | RNF133    | 1.799789292 | -0.028433557 | 0.262586 | -0.108283 | 0.913771 | 0.967525 |
| 17507 | METTL6    | 197.8995579 | -0.028595755 | 0.091106 | -0.313875 | 0.753616 | 0.843756 |
| 18288 | CA14      | 7.265086246 | -0.028764359 | 0.197065 | -0.145964 | 0.88395  | 0.947414 |
| 17557 | STAMBP    | 784.2460151 | -0.028791443 | 0.09552  | -0.301416 | 0.763097 | 0.851937 |
| 18669 | SHBG      | 8.486303517 | -0.028825288 | 0.343516 | -0.083912 | 0.933126 | 0.97971  |
| 18667 | ADRA1A    | 10.42662677 | -0.02885403  | 0.342524 | -0.084239 | 0.932866 | 0.979542 |
| 18189 | PTPN14    | 298.7714912 | -0.029053695 | 0.176322 | -0.164776 | 0.86912  | 0.936589 |
| 17964 | C15orf21  | 26.87352845 | -0.029692418 | 0.138927 | -0.213727 | 0.83076  | 0.906439 |
| 17695 | CASP6     | 278.2131197 | -0.029757124 | 0.110793 | -0.268583 | 0.788251 | 0.873156 |
| 17370 | TCTN3     | 1469.525507 | -0.029816021 | 0.085613 | -0.348264 | 0.727642 | 0.8211   |
| 17915 | RECQL     | 1139.374428 | -0.029853731 | 0.132369 | -0.225534 | 0.821564 | 0.898882 |
| 17859 | OLA1      | 1774.223186 | -0.030000469 | 0.127544 | -0.235216 | 0.814041 | 0.893444 |
| 18258 | PPP1R2P1  | 3.77972694  | -0.030006166 | 0.199414 | -0.150471 | 0.880393 | 0.945152 |
| 18186 | IFIT2     | 857.8553914 | -0.030055306 | 0.181273 | -0.165801 | 0.868313 | 0.935874 |
| 17686 | C16orf58  | 2253.979862 | -0.030383714 | 0.112105 | -0.271028 | 0.786369 | 0.871516 |
| 17891 | SLC38A2   | 4888.213771 | -0.030637291 | 0.133543 | -0.229419 | 0.818544 | 0.896779 |

|       |           |             |              |          |           |          |          |
|-------|-----------|-------------|--------------|----------|-----------|----------|----------|
| 17561 | RAB22A    | 1378.830981 | -0.030657642 | 0.102128 | -0.30019  | 0.764033 | 0.852788 |
| 18427 | ELFN1     | 127.202787  | -0.03092338  | 0.248996 | -0.124192 | 0.901163 | 0.958577 |
| 17559 | INTS5     | 609.0676778 | -0.031034164 | 0.103154 | -0.300852 | 0.763527 | 0.852321 |
| 17587 | TRIOBP    | 1866.274008 | -0.031037322 | 0.10467  | -0.296526 | 0.766828 | 0.854665 |
| 17378 | R3HDM1    | 561.4046638 | -0.031080721 | 0.08972  | -0.346418 | 0.729029 | 0.822286 |
| 18110 | DC1001316 | 29.27210016 | -0.031191402 | 0.172014 | -0.18133  | 0.856108 | 0.92649  |
| 18034 | PAQR7     | 622.5676724 | -0.031270497 | 0.156969 | -0.199214 | 0.842095 | 0.915266 |
| 17794 | VCL       | 3392.145875 | -0.031440909 | 0.127248 | -0.247084 | 0.804843 | 0.886576 |
| 18043 | OTUB2     | 56.33338918 | -0.031607596 | 0.159903 | -0.197667 | 0.843305 | 0.916041 |
| 18759 | FOSB      | 2560.818535 | -0.031613597 | 0.421535 | -0.074996 | 0.940218 | 0.982315 |
| 18247 | DZIP1L    | 131.4315428 | -0.031630234 | 0.205524 | -0.153901 | 0.877688 | 0.942764 |
| 17728 | UBOX5     | 308.8116063 | -0.03189057  | 0.122323 | -0.260707 | 0.794318 | 0.87824  |
| 18610 | SNAP25    | 151.9747873 | -0.032200493 | 0.3349   | -0.09615  | 0.923402 | 0.972574 |
| 17603 | ZFYVE27   | 807.6064837 | -0.032253492 | 0.109999 | -0.293216 | 0.769357 | 0.856682 |
| 18780 | LMO3      | 23.74089819 | -0.032285827 | 0.446689 | -0.072278 | 0.942381 | 0.983578 |
| 17997 | FEM1C     | 1551.372708 | -0.03245821  | 0.15739  | -0.206228 | 0.836613 | 0.911177 |
| 17585 | CAPN1     | 3190.930733 | -0.032687456 | 0.110112 | -0.296858 | 0.766575 | 0.854458 |
| 18989 | NAP1L6    | 5.501904884 | -0.032693815 | 0.621576 | -0.052598 | 0.958052 | 0.988929 |
| 17465 | SETD5     | 1376.568592 | -0.03291123  | 0.101863 | -0.323092 | 0.746625 | 0.837939 |
| 18089 | NBPF15    | 314.670744  | -0.033121386 | 0.176862 | -0.187273 | 0.851447 | 0.922617 |
| 17821 | DAK       | 785.7610672 | -0.033156951 | 0.136988 | -0.242043 | 0.808747 | 0.889526 |
| 18096 | COX6A1    | 3149.136769 | -0.033187161 | 0.180045 | -0.184327 | 0.853757 | 0.924762 |
| 19073 | LOC441177 | 1.022192457 | -0.03336971  | 0.797087 | -0.041865 | 0.966607 | 0.989949 |
| 17125 | CLCC1     | 889.1951705 | -0.03358685  | 0.083058 | -0.40438  | 0.685933 | 0.785108 |
| 17993 | MYO1D     | 1893.174077 | -0.033612434 | 0.162621 | -0.206692 | 0.836251 | 0.910966 |
| 17537 | CALM3     | 7746.25224  | -0.033839311 | 0.110475 | -0.306307 | 0.759371 | 0.848744 |
| 17688 | BCL2L1    | 4459.774422 | -0.033846387 | 0.12506  | -0.270641 | 0.786667 | 0.871698 |
| 18543 | SVEP1     | 463.1874634 | -0.034012054 | 0.331792 | -0.10251  | 0.918352 | 0.97075  |
| 18605 | SOX11     | 146.8493059 | -0.034040034 | 0.347204 | -0.09804  | 0.9219   | 0.972284 |
| 17787 | NCKIPSD   | 726.503511  | -0.034048862 | 0.137389 | -0.247828 | 0.804268 | 0.886291 |
| 17872 | CRLS1     | 1344.945826 | -0.034071625 | 0.146523 | -0.232535 | 0.816123 | 0.895077 |
| 18381 | GPC6      | 1533.987406 | -0.034085662 | 0.25792  | -0.132156 | 0.894861 | 0.954255 |
| 18768 | SORCS2    | 529.0913822 | -0.034224454 | 0.461519 | -0.074156 | 0.940886 | 0.982489 |
| 18005 | TPK1      | 234.8311    | -0.034258499 | 0.167033 | -0.2051   | 0.837494 | 0.911731 |
| 17405 | TMBIM1    | 5454.705745 | -0.034340504 | 0.101119 | -0.339606 | 0.734153 | 0.826781 |
| 18048 | SNHG8     | 683.791543  | -0.034371924 | 0.1745   | -0.196974 | 0.843848 | 0.916459 |
| 17021 | SNX11     | 533.4984864 | -0.034577139 | 0.079274 | -0.436175 | 0.66271  | 0.763241 |
| 17486 | POLA1     | 330.7419132 | -0.034579324 | 0.108905 | -0.317519 | 0.75085  | 0.841668 |
| 17852 | ZNF841    | 265.2907631 | -0.034657695 | 0.147072 | -0.235651 | 0.813703 | 0.893435 |
| 18090 | PLSCR1    | 1905.57115  | -0.03471149  | 0.185559 | -0.187065 | 0.85161  | 0.922742 |
| 18092 | CD55      | 828.4792372 | -0.034884823 | 0.18692  | -0.18663  | 0.851951 | 0.923054 |
| 17908 | C9orf9    | 136.0626142 | -0.034888881 | 0.154127 | -0.226365 | 0.820918 | 0.898504 |
| 17687 | TARBP1    | 485.4885886 | -0.034977559 | 0.129084 | -0.270967 | 0.786416 | 0.871518 |
| 17937 | FLNB      | 6460.366333 | -0.035045984 | 0.158931 | -0.220511 | 0.825473 | 0.902051 |
| 17648 | TTL       | 757.210768  | -0.035195337 | 0.125717 | -0.279956 | 0.779511 | 0.865775 |
| 17361 | DENR      | 1322.640937 | -0.035221518 | 0.100576 | -0.350199 | 0.726189 | 0.819885 |
| 17498 | NUDCD2    | 373.5545001 | -0.035264483 | 0.111935 | -0.315044 | 0.752728 | 0.843172 |

|       |          |             |              |          |           |          |          |
|-------|----------|-------------|--------------|----------|-----------|----------|----------|
| 17195 | PITRM1   | 1521.762934 | -0.035287054 | 0.090789 | -0.38867  | 0.69752  | 0.79512  |
| 18418 | KLHL10   | 1.378987525 | -0.035356927 | 0.281096 | -0.125782 | 0.899904 | 0.957706 |
| 16819 | TRIM27   | 1076.745062 | -0.035480243 | 0.073032 | -0.485818 | 0.627096 | 0.730823 |
| 18153 | ATP6V0B  | 2776.91932  | -0.035795763 | 0.205745 | -0.173982 | 0.86188  | 0.930629 |
| 17459 | DHRS7B   | 569.2983516 | -0.035974801 | 0.110849 | -0.324538 | 0.745531 | 0.836998 |
| 17448 | CCNY     | 2259.188713 | -0.035975588 | 0.109986 | -0.327092 | 0.743599 | 0.835355 |
| 16963 | SDF2     | 655.3739369 | -0.036052339 | 0.080258 | -0.449206 | 0.653283 | 0.754878 |
| 17775 | DHFR     | 252.36449   | -0.036057603 | 0.143498 | -0.251275 | 0.801601 | 0.883949 |
| 17016 | ZBED4    | 433.3203092 | -0.036320818 | 0.083176 | -0.436676 | 0.662346 | 0.762967 |
| 18515 | ABCA6    | 67.54233736 | -0.036340892 | 0.337811 | -0.107578 | 0.914331 | 0.967909 |
| 17438 | CUL7     | 1255.355684 | -0.036345484 | 0.110115 | -0.330068 | 0.741349 | 0.833305 |
| 17407 | USP31    | 545.6531776 | -0.036530583 | 0.107619 | -0.339443 | 0.734276 | 0.826825 |
| 17197 | TIMM22   | 446.2283859 | -0.036537007 | 0.094141 | -0.388108 | 0.697936 | 0.795501 |
| 17726 | HAUS6    | 466.0757421 | -0.036707046 | 0.140256 | -0.261715 | 0.793541 | 0.877479 |
| 17712 | ZBTB38   | 3360.850517 | -0.03675297  | 0.13901  | -0.264391 | 0.791478 | 0.87589  |
| 18428 | CDCA2    | 489.1881995 | -0.036887912 | 0.297209 | -0.124114 | 0.901225 | 0.958591 |
| 17182 | LSM6     | 235.1607387 | -0.037002974 | 0.094662 | -0.390894 | 0.695875 | 0.793846 |
| 17306 | VEZT     | 1430.437097 | -0.037019981 | 0.101261 | -0.36559  | 0.714671 | 0.809445 |
| 16751 | ZNF3     | 601.9306971 | -0.037096037 | 0.073545 | -0.5044   | 0.61398  | 0.718443 |
| 16936 | NCL      | 9242.820968 | -0.037434295 | 0.082431 | -0.454128 | 0.649736 | 0.751977 |
| 18825 | AKR1B10  | 112.2926995 | -0.037499804 | 0.622813 | -0.06021  | 0.951988 | 0.986718 |
| 17463 | MECR     | 331.9032563 | -0.037507807 | 0.115991 | -0.323368 | 0.746417 | 0.837801 |
| 17905 | C3orf71  | 22.55543266 | -0.037522342 | 0.164942 | -0.227488 | 0.820045 | 0.897721 |
| 18570 | GABBR2   | 8.107310131 | -0.037612258 | 0.378566 | -0.099354 | 0.920857 | 0.97193  |
| 16933 | RPP38    | 230.4538048 | -0.037767141 | 0.082993 | -0.455062 | 0.649065 | 0.75142  |
| 17735 | LIPT2    | 40.17642986 | -0.037825412 | 0.145672 | -0.259661 | 0.795125 | 0.878785 |
| 17406 | CSNK1A1  | 5634.347402 | -0.037951226 | 0.111803 | -0.339447 | 0.734273 | 0.826825 |
| 17391 | BRPF1    | 371.7980274 | -0.038080658 | 0.110753 | -0.343833 | 0.730972 | 0.823862 |
| 17953 | ACN9     | 211.7612867 | -0.03808247  | 0.176089 | -0.216268 | 0.828779 | 0.904806 |
| 17344 | TCEAL4   | 1944.276068 | -0.038089085 | 0.107129 | -0.355543 | 0.722183 | 0.816162 |
| 17460 | ANKRD52  | 1174.161506 | -0.038090557 | 0.117505 | -0.324162 | 0.745816 | 0.837222 |
| 18149 | TOP1P2   | 5.843121993 | -0.03829002  | 0.218307 | -0.175395 | 0.860769 | 0.929634 |
| 17397 | STK16    | 812.9674738 | -0.038305096 | 0.111865 | -0.342423 | 0.732033 | 0.824773 |
| 17037 | C17orf63 | 749.2115086 | -0.038418274 | 0.088846 | -0.432416 | 0.665439 | 0.765585 |
| 17562 | FLJ90757 | 714.0152292 | -0.038476751 | 0.128205 | -0.300119 | 0.764086 | 0.852799 |
| 18156 | DNAH10   | 25.16711208 | -0.038616022 | 0.223081 | -0.173103 | 0.86257  | 0.931221 |
| 17145 | TYW1     | 543.187314  | -0.038789371 | 0.096973 | -0.400003 | 0.689154 | 0.787875 |
| 17143 | WHSC1    | 1017.121649 | -0.039267344 | 0.098062 | -0.400433 | 0.688837 | 0.787604 |
| 17901 | RASA4    | 321.0238062 | -0.039621639 | 0.173837 | -0.227924 | 0.819705 | 0.89755  |
| 17729 | ZNF277   | 597.4960772 | -0.039714063 | 0.152384 | -0.260619 | 0.794386 | 0.878265 |
| 17141 | BUB3     | 1408.133589 | -0.03972534  | 0.099108 | -0.400828 | 0.688547 | 0.787364 |
| 17492 | RINT1    | 586.9645041 | -0.039737396 | 0.125586 | -0.316416 | 0.751687 | 0.842317 |
| 18553 | LRR1Q4   | 0.978259889 | -0.040008127 | 0.393683 | -0.101625 | 0.919054 | 0.970766 |
| 17264 | DGCR2    | 2850.193041 | -0.040078856 | 0.107003 | -0.374559 | 0.707988 | 0.803799 |
| 17530 | MFSD1    | 1848.997448 | -0.040112958 | 0.130407 | -0.307597 | 0.758389 | 0.847985 |
| 16919 | PHF5A    | 408.8407524 | -0.040137696 | 0.087327 | -0.459627 | 0.645784 | 0.748154 |
| 18021 | MRVI1    | 879.9133134 | -0.040491977 | 0.200499 | -0.201956 | 0.839951 | 0.913594 |

|       |           |             |              |          |           |          |          |
|-------|-----------|-------------|--------------|----------|-----------|----------|----------|
| 18403 | PAX9      | 4.052928075 | -0.04051822  | 0.316652 | -0.127958 | 0.898182 | 0.956652 |
| 17774 | HYAL2     | 1947.987326 | -0.040731781 | 0.161742 | -0.251832 | 0.801171 | 0.883524 |
| 17241 | PHTF1     | 354.704172  | -0.04074468  | 0.107633 | -0.378551 | 0.705021 | 0.801527 |
| 17983 | DBP       | 354.8861607 | -0.040939213 | 0.197132 | -0.207674 | 0.835484 | 0.910655 |
| 18323 | NRCAM     | 1165.157504 | -0.041096768 | 0.29243  | -0.140535 | 0.888237 | 0.950219 |
| 16713 | RPA1      | 1569.915308 | -0.041116877 | 0.079652 | -0.516206 | 0.605711 | 0.710377 |
| 17493 | KIAA0195  | 1793.603948 | -0.041343281 | 0.130727 | -0.316257 | 0.751807 | 0.842404 |
| 16864 | SNAP47    | 553.2260697 | -0.041475445 | 0.08729  | -0.475147 | 0.634682 | 0.73769  |
| 17656 | NDUFA1    | 2173.957022 | -0.041488179 | 0.149094 | -0.278269 | 0.780806 | 0.86682  |
| 17898 | USP43     | 95.69069816 | -0.041530214 | 0.181931 | -0.228274 | 0.819433 | 0.897441 |
| 17478 | IPO4      | 824.8809189 | -0.041531285 | 0.130095 | -0.319238 | 0.749546 | 0.84054  |
| 16862 | TMEM62    | 415.1837023 | -0.041577084 | 0.087384 | -0.475798 | 0.634218 | 0.737238 |
| 18061 | ZBTB47    | 500.7233144 | -0.041791968 | 0.215209 | -0.194192 | 0.846025 | 0.918163 |
| 17255 | SPAG7     | 912.9404967 | -0.041882231 | 0.111416 | -0.375908 | 0.706985 | 0.803108 |
| 17638 | SIPA1L2   | 1002.201994 | -0.041914141 | 0.148443 | -0.282358 | 0.777669 | 0.864174 |
| 17757 | KIFC3     | 1253.963185 | -0.042082541 | 0.164891 | -0.255215 | 0.798557 | 0.881485 |
| 18072 | AOC2      | 23.31205451 | -0.042166933 | 0.21932  | -0.192262 | 0.847537 | 0.919213 |
| 17427 | ATP5H     | 2882.760194 | -0.042396709 | 0.12738  | -0.332837 | 0.739257 | 0.831479 |
| 16594 | ANAPC7    | 901.4121929 | -0.042528944 | 0.0774   | -0.549469 | 0.582684 | 0.688272 |
| 17317 | MED11     | 317.4872143 | -0.042708659 | 0.117877 | -0.362315 | 0.717116 | 0.811606 |
| 17861 | HDAC9     | 141.9413242 | -0.042750622 | 0.181924 | -0.234991 | 0.814215 | 0.893523 |
| 18266 | SERHL2    | 36.5256473  | -0.043030701 | 0.287964 | -0.149431 | 0.881214 | 0.945618 |
| 17553 | C9orf119  | 314.0467377 | -0.043115579 | 0.142667 | -0.302211 | 0.762491 | 0.851455 |
| 17972 | FBXL22    | 14.0655326  | -0.043193544 | 0.203054 | -0.21272  | 0.831545 | 0.906918 |
| 17943 | SLFN5     | 670.9597552 | -0.043202169 | 0.196956 | -0.21935  | 0.826378 | 0.902738 |
| 17111 | BAT2L2    | 3885.123097 | -0.043266901 | 0.105797 | -0.40896  | 0.682569 | 0.781897 |
| 17334 | FBXW7     | 410.5723894 | -0.043484478 | 0.120848 | -0.359828 | 0.718976 | 0.813015 |
| 17102 | SMARCA4   | 2030.370594 | -0.043777536 | 0.106156 | -0.412387 | 0.680056 | 0.779428 |
| 17212 | EHD4      | 1633.57975  | -0.043846899 | 0.113795 | -0.385316 | 0.700003 | 0.797163 |
| 17013 | LRRC47    | 973.3734893 | -0.043982567 | 0.100637 | -0.437043 | 0.66208  | 0.762795 |
| 18187 | FATE1     | 33.03978647 | -0.043999733 | 0.266402 | -0.165163 | 0.868816 | 0.936313 |
| 16883 | PSMD1     | 1802.303139 | -0.044023866 | 0.093897 | -0.468853 | 0.639175 | 0.742076 |
| 18372 | MIR17HG   | 25.82019419 | -0.044113058 | 0.330051 | -0.133655 | 0.893675 | 0.953458 |
| 17874 | EPS8L2    | 3492.608919 | -0.044153204 | 0.190323 | -0.231991 | 0.816545 | 0.89544  |
| 17240 | PGAM1     | 6702.30428  | -0.044213093 | 0.116685 | -0.378909 | 0.704755 | 0.801271 |
| 16920 | C15orf57  | 459.0451339 | -0.044321008 | 0.096466 | -0.459445 | 0.645914 | 0.748228 |
| 17792 | RRP7B     | 78.13227905 | -0.044440502 | 0.179763 | -0.247217 | 0.80474  | 0.886568 |
| 16954 | CSE1L     | 1832.762862 | -0.045015087 | 0.100115 | -0.449636 | 0.652973 | 0.754655 |
| 16678 | C4orf42   | 363.861941  | -0.045096036 | 0.085733 | -0.526005 | 0.598885 | 0.703846 |
| 17699 | NR3C1     | 3524.43425  | -0.045116367 | 0.16865  | -0.267514 | 0.789073 | 0.87387  |
| 17816 | LOC285593 | 5.278151408 | -0.04514197  | 0.185569 | -0.243262 | 0.807802 | 0.888737 |
| 16556 | DUSP12    | 212.1491989 | -0.045311407 | 0.081269 | -0.557548 | 0.577153 | 0.683304 |
| 17624 | ZNF518B   | 262.9140985 | -0.045524045 | 0.158179 | -0.287802 | 0.773499 | 0.860267 |
| 17207 | MEMO1     | 307.9605682 | -0.045582122 | 0.118138 | -0.385837 | 0.699618 | 0.796909 |
| 17254 | RNF187    | 3812.113295 | -0.045661779 | 0.121459 | -0.375945 | 0.706958 | 0.803108 |
| 18309 | ZBTB16    | 216.2003323 | -0.045922824 | 0.322276 | -0.142495 | 0.886689 | 0.94932  |
| 18367 | PALM3     | 212.5144646 | -0.046030898 | 0.340115 | -0.135339 | 0.892344 | 0.952296 |



|       |           |             |              |          |           |          |          |
|-------|-----------|-------------|--------------|----------|-----------|----------|----------|
| 17824 | DEPDC6    | 624.3475151 | -0.046120357 | 0.1914   | -0.240963 | 0.809583 | 0.890297 |
| 17887 | C14orf19  | 3.57828009  | -0.046281904 | 0.201585 | -0.22959  | 0.81841  | 0.896733 |
| 17050 | HEBP1     | 1108.492339 | -0.046292944 | 0.108338 | -0.427303 | 0.669159 | 0.769278 |
| 16584 | EIF2B5    | 964.1189883 | -0.046311475 | 0.083971 | -0.551515 | 0.581281 | 0.687029 |
| 16906 | ZBTB2     | 361.8523376 | -0.046347956 | 0.099946 | -0.46373  | 0.642841 | 0.745317 |
| 17644 | C1orf103  | 342.8728031 | -0.046484065 | 0.165143 | -0.281477 | 0.778344 | 0.864675 |
| 18202 | IFI44L    | 1020.757105 | -0.046715436 | 0.289705 | -0.161252 | 0.871895 | 0.938942 |
| 16826 | DHX38     | 1289.421223 | -0.046783874 | 0.096577 | -0.48442  | 0.628088 | 0.731676 |
| 17722 | MEM120E   | 421.4203469 | -0.046824085 | 0.178643 | -0.26211  | 0.793237 | 0.877341 |
| 17731 | C20orf202 | 18.36119444 | -0.046964678 | 0.180428 | -0.260295 | 0.794636 | 0.878442 |
| 17431 | HDAC6     | 1849.518413 | -0.047057127 | 0.141969 | -0.331461 | 0.740297 | 0.832457 |
| 17198 | ZNF672    | 777.4438441 | -0.047123991 | 0.121571 | -0.387624 | 0.698294 | 0.795863 |
| 17054 | ZKSCAN4   | 103.2942654 | -0.047235573 | 0.110693 | -0.426727 | 0.669578 | 0.769579 |
| 17675 | GPRC5C    | 2258.930689 | -0.047293171 | 0.172519 | -0.274133 | 0.783982 | 0.869411 |
| 17218 | CD47      | 2137.909797 | -0.047373253 | 0.123119 | -0.384778 | 0.700402 | 0.797339 |
| 17253 | C21orf45  | 144.6692563 | -0.047418088 | 0.126134 | -0.375934 | 0.706966 | 0.803108 |
| 17411 | CANX      | 28923.04117 | -0.047555915 | 0.140251 | -0.339078 | 0.734551 | 0.826945 |
| 17840 | IRAK3     | 368.2534755 | -0.047724393 | 0.201413 | -0.236947 | 0.812698 | 0.89287  |
| 17634 | WASH2P    | 345.4849404 | -0.047903188 | 0.169143 | -0.283211 | 0.777015 | 0.863688 |
| 18009 | ANGPTL2   | 2226.875511 | -0.04807712  | 0.236342 | -0.203422 | 0.838805 | 0.912703 |
| 17520 | RCL1      | 367.871341  | -0.048172431 | 0.154907 | -0.310977 | 0.755818 | 0.845593 |
| 16839 | MRPS16    | 1468.509754 | -0.04819278  | 0.100317 | -0.480403 | 0.630941 | 0.73443  |
| 16797 | UNC45A    | 1654.567989 | -0.048254122 | 0.098326 | -0.490754 | 0.6236   | 0.727701 |
| 18706 | NTNG1     | 15.20100596 | -0.04830094  | 0.60148  | -0.080303 | 0.935996 | 0.980779 |
| 16955 | CTPS2     | 440.14744   | -0.048756565 | 0.108365 | -0.449929 | 0.652762 | 0.754655 |
| 17925 | EMID1     | 135.1285662 | -0.048946818 | 0.218935 | -0.223568 | 0.823094 | 0.900054 |
| 17984 | S3-LOC440 | 55.63245998 | -0.049268245 | 0.237376 | -0.207554 | 0.835577 | 0.910707 |
| 17389 | DOM3Z     | 308.3045463 | -0.049357866 | 0.143502 | -0.343952 | 0.730882 | 0.823808 |
| 17424 | TTC26     | 145.0345217 | -0.049574471 | 0.14806  | -0.334828 | 0.737755 | 0.829932 |
| 17515 | C21orf119 | 71.57991848 | -0.049726844 | 0.159455 | -0.311855 | 0.75515  | 0.844991 |
| 18749 | CYP2A6    | 0.425445999 | -0.049929743 | 0.655778 | -0.076138 | 0.939309 | 0.981934 |
| 16850 | ABHD15    | 470.461102  | -0.050042812 | 0.104625 | -0.478306 | 0.632432 | 0.735686 |
| 16914 | GTF2H4    | 355.9992607 | -0.050136536 | 0.108804 | -0.460798 | 0.644944 | 0.747401 |
| 16890 | TOMM5     | 888.3024604 | -0.050340033 | 0.107675 | -0.467517 | 0.64013  | 0.742877 |
| 16699 | LRRFIP1   | 3222.721386 | -0.050368822 | 0.096931 | -0.519636 | 0.603317 | 0.708163 |
| 18192 | LAMC3     | 453.3429036 | -0.050379174 | 0.307444 | -0.163865 | 0.869838 | 0.937208 |
| 16925 | TCERG1    | 865.1971833 | -0.050422391 | 0.109894 | -0.458828 | 0.646358 | 0.748553 |
| 17671 | IL7       | 100.8096214 | -0.050443387 | 0.183393 | -0.275056 | 0.783273 | 0.868772 |
| 18638 | DN1-GTF2a | 11.19845742 | -0.050557205 | 0.560215 | -0.090246 | 0.928092 | 0.976045 |
| 17475 | KCTD3     | 2766.783139 | -0.050563675 | 0.158146 | -0.319727 | 0.749175 | 0.840319 |
| 16668 | CWC15     | 999.3489925 | -0.050575946 | 0.095557 | -0.529273 | 0.596616 | 0.7016   |
| 18751 | MAB21L2   | 0.404040234 | -0.050660158 | 0.665915 | -0.076076 | 0.939359 | 0.981934 |
| 18710 | GNAT1     | 0.352129351 | -0.050660162 | 0.639996 | -0.079157 | 0.936908 | 0.981508 |
| 18753 | TERC      | 0.314836651 | -0.050660209 | 0.66637  | -0.076024 | 0.9394   | 0.981934 |
| 18752 | MYOG      | 0.314279048 | -0.05066021  | 0.666436 | -0.076017 | 0.939406 | 0.981934 |
| 18771 | ZBTB8B    | 0.330962134 | -0.050660211 | 0.681873 | -0.074296 | 0.940775 | 0.982489 |
| 18761 | PPP3R2    | 0.310481217 | -0.050660217 | 0.674845 | -0.075069 | 0.94016  | 0.982315 |

|       |           |             |              |          |           |          |          |
|-------|-----------|-------------|--------------|----------|-----------|----------|----------|
| 18827 | AQP12B    | 0.356973796 | -0.050660297 | 0.786936 | -0.064377 | 0.94867  | 0.986718 |
| 18886 | LOC91948  | 0.39548438  | -0.050660356 | 0.884574 | -0.057271 | 0.954329 | 0.986718 |
| 18914 | PAPOLB    | 0.292617198 | -0.050660414 | 0.840911 | -0.060245 | 0.951961 | 0.986718 |
| 18944 | TAS2R46   | 0.213064683 | -0.050660436 | 0.797642 | -0.063513 | 0.949358 | 0.986718 |
| 19132 | OR6W1P    | 0.231283049 | -0.050660726 | 1.007091 | -0.050304 | 0.95988  | 0.989949 |
| 19050 | HESRG     | 0.157966906 | -0.05066109  | 1.130833 | -0.0448   | 0.964267 | 0.989949 |
| 19016 | CACNG2    | 0.170562997 | -0.050661242 | 1.219807 | -0.041532 | 0.966872 | 0.989949 |
| 19060 | KRT37     | 0.137331159 | -0.050661327 | 1.219715 | -0.041535 | 0.966869 | 0.989949 |
| 19235 | PSAPL1    | 0.337762221 | -0.050661348 | 1.46853  | -0.034498 | 0.97248  | 0.990995 |
| 19155 | PWRN2     | 0.168575743 | -0.050661488 | 1.326838 | -0.038182 | 0.969542 | 0.989949 |
| 18999 | AOX2P     | 0.161224244 | -0.050661492 | 1.307896 | -0.038735 | 0.969102 | 0.989949 |
| 19223 | HS3ST6    | 0.303867195 | -0.050661498 | 1.42509  | -0.03555  | 0.971641 | 0.990696 |
| 19144 | PDILT     | 0.16065028  | -0.0506615   | 1.311024 | -0.038643 | 0.969175 | 0.989949 |
| 19224 | OR2L1P    | 0.180476248 | -0.050661732 | 1.425026 | -0.035551 | 0.97164  | 0.990696 |
| 19227 | PRSS33    | 0.136299872 | -0.050661861 | 1.429525 | -0.03544  | 0.971729 | 0.990697 |
| 19225 | C6orf94   | 0.135699203 | -0.05066187  | 1.43271  | -0.035361 | 0.971792 | 0.990697 |
| 19230 | C20orf173 | 0.115343663 | -0.050661959 | 1.443125 | -0.035106 | 0.971995 | 0.990748 |
| 19259 | OR11A1    | 0.142561689 | -0.050662707 | 1.70997  | -0.029628 | 0.976364 | 0.993693 |
| 19260 | RNU11     | 0.137579338 | -0.050662717 | 1.712894 | -0.029577 | 0.976404 | 0.993693 |
| 19266 | KRT71     | 0.097428222 | -0.050663034 | 1.754674 | -0.028873 | 0.976966 | 0.993972 |
| 19265 | HTR1A     | 0.096479824 | -0.05066304  | 1.756618 | -0.028841 | 0.976991 | 0.993972 |
| 19267 | OR51I1    | 0.094880771 | -0.050663052 | 1.759947 | -0.028787 | 0.977035 | 0.993972 |
| 19276 | BAGE      | 0.116304756 | -0.050663533 | 1.91666  | -0.026433 | 0.978912 | 0.994878 |
| 19289 | CCL27     | 0.097235947 | -0.050663767 | 1.949205 | -0.025992 | 0.979264 | 0.994878 |
| 19284 | C8orf86   | 0.095820143 | -0.050663781 | 1.952696 | -0.025946 | 0.979301 | 0.994878 |
| 19395 | SNORA21   | 0.080255666 | -0.050664021 | 1.984142 | -0.025534 | 0.979629 | 0.994878 |
| 19386 | RNF151    | 0.080127288 | -0.050664022 | 1.984539 | -0.025529 | 0.979633 | 0.994878 |
| 19424 | XKRY2     | 0.081523707 | -0.050665073 | 2.222987 | -0.022791 | 0.981817 | 0.994878 |
| 19271 | AMBN      | 0.079006163 | -0.050665118 | 2.232531 | -0.022694 | 0.981894 | 0.994878 |
| 19300 | EPGN      | 0.078807613 | -0.050665121 | 2.2333   | -0.022686 | 0.981901 | 0.994878 |
| 19402 | SPAG11B   | 0.077817485 | -0.050665139 | 2.237169 | -0.022647 | 0.981932 | 0.994878 |
| 19410 | SSX4      | 0.07756287  | -0.050665144 | 2.238174 | -0.022637 | 0.98194  | 0.994878 |
| 19335 | LOC338588 | 0.076800997 | -0.050665158 | 2.241206 | -0.022606 | 0.981964 | 0.994878 |
| 19320 | HSD3B1    | 0.076134092 | -0.050665171 | 2.24389  | -0.022579 | 0.981986 | 0.994878 |
| 19379 | PPY2      | 0.082949209 | -0.050666556 | 2.521381 | -0.020095 | 0.983968 | 0.994878 |
| 19429 | ZNRF4     | 0.076100261 | -0.05066672  | 2.552248 | -0.019852 | 0.984162 | 0.994878 |
| 19351 | ODF4      | 0.075644056 | -0.050666732 | 2.554587 | -0.019834 | 0.984176 | 0.994878 |
| 19291 | CELA3B    | 0.076053392 | -0.050666733 | 2.554735 | -0.019832 | 0.984177 | 0.994878 |
| 19400 | SNORA5C   | 0.061066445 | -0.05066735  | 2.631558 | -0.019254 | 0.984639 | 0.994878 |
| 19298 | DEFB131   | 0.060798506 | -0.05066736  | 2.633373 | -0.01924  | 0.984649 | 0.994878 |
| 19292 | CHRN3     | 0.05889044  | -0.050667435 | 2.646602 | -0.019144 | 0.984726 | 0.994878 |
| 19397 | SNORA3    | 0.058818828 | -0.050667438 | 2.64711  | -0.019141 | 0.984729 | 0.994878 |
| 19288 | CCDC70    | 0.058584254 | -0.050667448 | 2.648776 | -0.019129 | 0.984738 | 0.994878 |
| 19414 | TFAP2D    | 0.058468235 | -0.050667452 | 2.649604 | -0.019123 | 0.984743 | 0.994878 |
| 19322 | HTR5A     | 0.057883282 | -0.050667476 | 2.653809 | -0.019092 | 0.984767 | 0.994878 |
| 19382 | PRSS38    | 0.057770393 | -0.050667481 | 2.654626 | -0.019086 | 0.984772 | 0.994878 |
| 19411 | TAS2R60   | 0.05708424  | -0.05066751  | 2.659641 | -0.019051 | 0.984801 | 0.994878 |

|       |           |             |              |          |           |          |          |
|-------|-----------|-------------|--------------|----------|-----------|----------|----------|
| 19352 | OR10G2    | 0.056985858 | -0.050667514 | 2.660366 | -0.019045 | 0.984805 | 0.994878 |
| 19427 | ZNF645    | 0.056624077 | -0.050667529 | 2.663048 | -0.019026 | 0.98482  | 0.994878 |
| 19423 | VWC2L     | 0.056413291 | -0.050667538 | 2.66462  | -0.019015 | 0.984829 | 0.994878 |
| 19336 | LOC388428 | 0.056208618 | -0.050667547 | 2.666154 | -0.019004 | 0.984838 | 0.994878 |
| 19272 | AMELX     | 0.141837343 | -0.050668056 | 2.91407  | -0.017387 | 0.986128 | 0.994878 |
| 19304 | FEZF2     | 0.12771144  | -0.050668546 | 2.91407  | -0.017388 | 0.986127 | 0.994878 |
| 19403 | SPAM1     | 0.076945531 | -0.050668791 | 2.91407  | -0.017388 | 0.986127 | 0.994878 |
| 19399 | SNORA49   | 0.080697521 | -0.050668791 | 2.91407  | -0.017388 | 0.986127 | 0.994878 |
| 19353 | OR10G3    | 0.076714595 | -0.050668791 | 2.91407  | -0.017388 | 0.986127 | 0.994878 |
| 19360 | OR2Z1     | 0.076128921 | -0.050668791 | 2.91407  | -0.017388 | 0.986127 | 0.994878 |
| 19307 | GAB4      | 0.077796117 | -0.050669036 | 2.91407  | -0.017388 | 0.986127 | 0.994878 |
| 19390 | SDC4P     | 0.057291876 | -0.050669036 | 2.91407  | -0.017388 | 0.986127 | 0.994878 |
| 19419 | TRIM49L   | 0.058013413 | -0.050669036 | 2.91407  | -0.017388 | 0.986127 | 0.994878 |
| 19381 | PRAMEF18  | 0.055144776 | -0.050669036 | 2.91407  | -0.017388 | 0.986127 | 0.994878 |
| 19376 | PMCHL2    | 0.057853085 | -0.050669036 | 2.91407  | -0.017388 | 0.986127 | 0.994878 |
| 19308 | GBX1      | 0.055884655 | -0.050669036 | 2.91407  | -0.017388 | 0.986127 | 0.994878 |
| 19281 | C19orf30  | 0.037939303 | -0.050669281 | 2.91407  | -0.017388 | 0.986127 | 0.994878 |
| 19373 | PAX4      | 0.036522666 | -0.050669281 | 2.91407  | -0.017388 | 0.986127 | 0.994878 |
| 19374 | PER4      | 0.039588499 | -0.050669281 | 2.91407  | -0.017388 | 0.986127 | 0.994878 |
| 19313 | GRXCR2    | 0.039023232 | -0.050669281 | 2.91407  | -0.017388 | 0.986127 | 0.994878 |
| 19319 | HNRNPL    | 0.035901018 | -0.050669281 | 2.91407  | -0.017388 | 0.986127 | 0.994878 |
| 19321 | HTR1E     | 0.04110683  | -0.050669281 | 2.91407  | -0.017388 | 0.986127 | 0.994878 |
| 19367 | OR5H2     | 0.038852112 | -0.050669281 | 2.91407  | -0.017388 | 0.986127 | 0.994878 |
| 19404 | SPATA16   | 0.038456688 | -0.050669281 | 2.91407  | -0.017388 | 0.986127 | 0.994878 |
| 19372 | PAGE2     | 0.040411543 | -0.050669281 | 2.91407  | -0.017388 | 0.986127 | 0.994878 |
| 19384 | RBMXL3    | 0.036279039 | -0.050669281 | 2.91407  | -0.017388 | 0.986127 | 0.994878 |
| 19306 | FLJ46361  | 0.038402317 | -0.050669281 | 2.91407  | -0.017388 | 0.986127 | 0.994878 |
| 19316 | HMGB3L1   | 0.040855179 | -0.050669281 | 2.91407  | -0.017388 | 0.986127 | 0.994878 |
| 19341 | MAGEB4    | 0.037203934 | -0.050669281 | 2.91407  | -0.017388 | 0.986127 | 0.994878 |
| 19350 | NPSR1     | 0.038894471 | -0.050669281 | 2.91407  | -0.017388 | 0.986127 | 0.994878 |
| 19362 | OR4N4     | 0.037029123 | -0.050669281 | 2.91407  | -0.017388 | 0.986127 | 0.994878 |
| 19368 | OR6B2     | 0.039822624 | -0.050669281 | 2.91407  | -0.017388 | 0.986127 | 0.994878 |
| 19394 | SNORA16A  | 0.040979173 | -0.050669281 | 2.91407  | -0.017388 | 0.986127 | 0.994878 |
| 19409 | SSX3      | 0.03731163  | -0.050669281 | 2.91407  | -0.017388 | 0.986127 | 0.994878 |
| 19413 | TBC1D28   | 0.038182109 | -0.050669281 | 2.91407  | -0.017388 | 0.986127 | 0.994878 |
| 19287 | CCDC105   | 0.037214426 | -0.050669281 | 2.91407  | -0.017388 | 0.986127 | 0.994878 |
| 19317 | HMGB4     | 0.037319861 | -0.050669281 | 2.91407  | -0.017388 | 0.986127 | 0.994878 |
| 19318 | HMX3      | 0.038788305 | -0.050669281 | 2.91407  | -0.017388 | 0.986127 | 0.994878 |
| 19327 | KRT28     | 0.038109067 | -0.050669281 | 2.91407  | -0.017388 | 0.986127 | 0.994878 |
| 19331 | LOC149620 | 0.039286496 | -0.050669281 | 2.91407  | -0.017388 | 0.986127 | 0.994878 |
| 19340 | MAGEB1    | 0.035470493 | -0.050669281 | 2.91407  | -0.017388 | 0.986127 | 0.994878 |
| 19344 | CRNA0005  | 0.039103636 | -0.050669281 | 2.91407  | -0.017388 | 0.986127 | 0.994878 |
| 19355 | OR111     | 0.036420151 | -0.050669281 | 2.91407  | -0.017388 | 0.986127 | 0.994878 |
| 19377 | POTEC     | 0.037298793 | -0.050669281 | 2.91407  | -0.017388 | 0.986127 | 0.994878 |
| 19389 | SAMD7     | 0.037214426 | -0.050669281 | 2.91407  | -0.017388 | 0.986127 | 0.994878 |
| 19407 | SRY       | 0.038604052 | -0.050669281 | 2.91407  | -0.017388 | 0.986127 | 0.994878 |
| 19408 | SSTR4     | 0.039167423 | -0.050669281 | 2.91407  | -0.017388 | 0.986127 | 0.994878 |

|       |           |             |              |         |           |          |    |
|-------|-----------|-------------|--------------|---------|-----------|----------|----|
| 19744 | GAGE8     | 0.019886289 | -0.050669526 | 2.91407 | -0.017388 | 0.986127 | NA |
| 19853 | LALBA     | 0.018229699 | -0.050669526 | 2.91407 | -0.017388 | 0.986127 | NA |
| 19884 | LOC340017 | 0.017774032 | -0.050669526 | 2.91407 | -0.017388 | 0.986127 | NA |
| 19925 | NKX2-6    | 0.017973188 | -0.050669526 | 2.91407 | -0.017388 | 0.986127 | NA |
| 19603 | ACTL7A    | 0.017951967 | -0.050669526 | 2.91407 | -0.017388 | 0.986127 | NA |
| 19608 | ARSH      | 0.018725566 | -0.050669526 | 2.91407 | -0.017388 | 0.986127 | NA |
| 19619 | C12orf12  | 0.017736319 | -0.050669526 | 2.91407 | -0.017388 | 0.986127 | NA |
| 19620 | C14orf177 | 0.01798535  | -0.050669526 | 2.91407 | -0.017388 | 0.986127 | NA |
| 19623 | C15orf32  | 0.018280013 | -0.050669526 | 2.91407 | -0.017388 | 0.986127 | NA |
| 19631 | C20orf79  | 0.019777014 | -0.050669526 | 2.91407 | -0.017388 | 0.986127 | NA |
| 19633 | C21orf131 | 0.01798535  | -0.050669526 | 2.91407 | -0.017388 | 0.986127 | NA |
| 19636 | C22orf33  | 0.019160126 | -0.050669526 | 2.91407 | -0.017388 | 0.986127 | NA |
| 19637 | C22orf42  | 0.020281315 | -0.050669526 | 2.91407 | -0.017388 | 0.986127 | NA |
| 19638 | C2orf27B  | 0.018343547 | -0.050669526 | 2.91407 | -0.017388 | 0.986127 | NA |
| 19656 | CGB1      | 0.019025018 | -0.050669526 | 2.91407 | -0.017388 | 0.986127 | NA |
| 19661 | CRYGB     | 0.01829716  | -0.050669526 | 2.91407 | -0.017388 | 0.986127 | NA |
| 19694 | EFB109P1  | 0.020609081 | -0.050669526 | 2.91407 | -0.017388 | 0.986127 | NA |
| 19712 | KFZp434L1 | 0.01798535  | -0.050669526 | 2.91407 | -0.017388 | 0.986127 | NA |
| 19734 | FTLP10    | 0.018144159 | -0.050669526 | 2.91407 | -0.017388 | 0.986127 | NA |
| 19737 | GAGE10    | 0.017745983 | -0.050669526 | 2.91407 | -0.017388 | 0.986127 | NA |
| 19746 | GALP      | 0.019518323 | -0.050669526 | 2.91407 | -0.017388 | 0.986127 | NA |
| 19748 | GCG       | 0.019170341 | -0.050669526 | 2.91407 | -0.017388 | 0.986127 | NA |
| 19749 | GDEP      | 0.018144159 | -0.050669526 | 2.91407 | -0.017388 | 0.986127 | NA |
| 19750 | GDF2      | 0.017194806 | -0.050669526 | 2.91407 | -0.017388 | 0.986127 | NA |
| 19753 | GML       | 0.020609081 | -0.050669526 | 2.91407 | -0.017388 | 0.986127 | NA |
| 19754 | GNRH2     | 0.01907054  | -0.050669526 | 2.91407 | -0.017388 | 0.986127 | NA |
| 19759 | GPX5      | 0.01798535  | -0.050669526 | 2.91407 | -0.017388 | 0.986127 | NA |
| 19764 | GUCA2A    | 0.019335965 | -0.050669526 | 2.91407 | -0.017388 | 0.986127 | NA |
| 19772 | HDGFL1    | 0.019295964 | -0.050669526 | 2.91407 | -0.017388 | 0.986127 | NA |
| 19779 | HTN1      | 0.019340908 | -0.050669526 | 2.91407 | -0.017388 | 0.986127 | NA |
| 19784 | IFNA17    | 0.01798535  | -0.050669526 | 2.91407 | -0.017388 | 0.986127 | NA |
| 19791 | IL22      | 0.0192929   | -0.050669526 | 2.91407 | -0.017388 | 0.986127 | NA |
| 19792 | IL28A     | 0.01907054  | -0.050669526 | 2.91407 | -0.017388 | 0.986127 | NA |
| 19799 | KNCN      | 0.019365615 | -0.050669526 | 2.91407 | -0.017388 | 0.986127 | NA |
| 19801 | KRTAP10-1 | 0.01798535  | -0.050669526 | 2.91407 | -0.017388 | 0.986127 | NA |
| 19815 | KRTAP15-1 | 0.017736319 | -0.050669526 | 2.91407 | -0.017388 | 0.986127 | NA |
| 19838 | KRTAP4-3  | 0.019047992 | -0.050669526 | 2.91407 | -0.017388 | 0.986127 | NA |
| 19850 | KRTAP9-8  | 0.01798535  | -0.050669526 | 2.91407 | -0.017388 | 0.986127 | NA |
| 19856 | LCE2A     | 0.017745983 | -0.050669526 | 2.91407 | -0.017388 | 0.986127 | NA |
| 19863 | LCE3E     | 0.019605585 | -0.050669526 | 2.91407 | -0.017388 | 0.986127 | NA |
| 19864 | LCE4A     | 0.017736319 | -0.050669526 | 2.91407 | -0.017388 | 0.986127 | NA |
| 19876 | LOC200726 | 0.017194806 | -0.050669526 | 2.91407 | -0.017388 | 0.986127 | NA |
| 19879 | LOC285194 | 0.017194806 | -0.050669526 | 2.91407 | -0.017388 | 0.986127 | NA |
| 19891 | LOC653544 | 0.018742511 | -0.050669526 | 2.91407 | -0.017388 | 0.986127 | NA |
| 19907 | MRGPRX1   | 0.019365615 | -0.050669526 | 2.91407 | -0.017388 | 0.986127 | NA |
| 19921 | NEUROD6   | 0.017194806 | -0.050669526 | 2.91407 | -0.017388 | 0.986127 | NA |
| 19930 | ONECUT3   | 0.020422888 | -0.050669526 | 2.91407 | -0.017388 | 0.986127 | NA |

|       |           |             |              |          |           |          |          |
|-------|-----------|-------------|--------------|----------|-----------|----------|----------|
| 19940 | OR10J1    | 0.01798535  | -0.050669526 | 2.91407  | -0.017388 | 0.986127 | NA       |
| 19947 | OR12D3    | 0.017194806 | -0.050669526 | 2.91407  | -0.017388 | 0.986127 | NA       |
| 19949 | OR13C3    | 0.019311634 | -0.050669526 | 2.91407  | -0.017388 | 0.986127 | NA       |
| 19954 | OR13H1    | 0.017951967 | -0.050669526 | 2.91407  | -0.017388 | 0.986127 | NA       |
| 19961 | OR1M1     | 0.017886404 | -0.050669526 | 2.91407  | -0.017388 | 0.986127 | NA       |
| 19977 | OR2T1     | 0.018887649 | -0.050669526 | 2.91407  | -0.017388 | 0.986127 | NA       |
| 19984 | OR4A15    | 0.019044178 | -0.050669526 | 2.91407  | -0.017388 | 0.986127 | NA       |
| 20001 | OR4K13    | 0.01798535  | -0.050669526 | 2.91407  | -0.017388 | 0.986127 | NA       |
| 20002 | OR4K14    | 0.01798535  | -0.050669526 | 2.91407  | -0.017388 | 0.986127 | NA       |
| 20007 | OR4M2     | 0.01798535  | -0.050669526 | 2.91407  | -0.017388 | 0.986127 | NA       |
| 20013 | OR51D1    | 0.018526863 | -0.050669526 | 2.91407  | -0.017388 | 0.986127 | NA       |
| 20024 | OR56A1    | 0.018144159 | -0.050669526 | 2.91407  | -0.017388 | 0.986127 | NA       |
| 20025 | OR56A4    | 0.017194806 | -0.050669526 | 2.91407  | -0.017388 | 0.986127 | NA       |
| 20027 | OR5A2     | 0.01798535  | -0.050669526 | 2.91407  | -0.017388 | 0.986127 | NA       |
| 20039 | OR5F1     | 0.01798535  | -0.050669526 | 2.91407  | -0.017388 | 0.986127 | NA       |
| 20040 | OR5H1     | 0.018369583 | -0.050669526 | 2.91407  | -0.017388 | 0.986127 | NA       |
| 20043 | OR5I1     | 0.017194806 | -0.050669526 | 2.91407  | -0.017388 | 0.986127 | NA       |
| 20047 | OR5L2     | 0.017194806 | -0.050669526 | 2.91407  | -0.017388 | 0.986127 | NA       |
| 20048 | OR5M10    | 0.017194806 | -0.050669526 | 2.91407  | -0.017388 | 0.986127 | NA       |
| 20057 | OR6B1     | 0.018603915 | -0.050669526 | 2.91407  | -0.017388 | 0.986127 | NA       |
| 20058 | OR6B3     | 0.018662226 | -0.050669526 | 2.91407  | -0.017388 | 0.986127 | NA       |
| 20059 | OR6C1     | 0.017194806 | -0.050669526 | 2.91407  | -0.017388 | 0.986127 | NA       |
| 20067 | OR6C76    | 0.018679204 | -0.050669526 | 2.91407  | -0.017388 | 0.986127 | NA       |
| 20072 | OR6N2     | 0.01798535  | -0.050669526 | 2.91407  | -0.017388 | 0.986127 | NA       |
| 20076 | OR6Y1     | 0.019145335 | -0.050669526 | 2.91407  | -0.017388 | 0.986127 | NA       |
| 20080 | OR7D4     | 0.018742511 | -0.050669526 | 2.91407  | -0.017388 | 0.986127 | NA       |
| 20081 | OR7E24    | 0.020093928 | -0.050669526 | 2.91407  | -0.017388 | 0.986127 | NA       |
| 20085 | OR8B4     | 0.01798535  | -0.050669526 | 2.91407  | -0.017388 | 0.986127 | NA       |
| 20099 | OR9A2     | 0.018343547 | -0.050669526 | 2.91407  | -0.017388 | 0.986127 | NA       |
| 20121 | PRAMEF6   | 0.017194806 | -0.050669526 | 2.91407  | -0.017388 | 0.986127 | NA       |
| 20122 | PRB4      | 0.0190584   | -0.050669526 | 2.91407  | -0.017388 | 0.986127 | NA       |
| 20143 | RGR       | 0.01913409  | -0.050669526 | 2.91407  | -0.017388 | 0.986127 | NA       |
| 20160 | SCARNA4   | 0.020013024 | -0.050669526 | 2.91407  | -0.017388 | 0.986127 | NA       |
| 20166 | SMR3A     | 0.0195757   | -0.050669526 | 2.91407  | -0.017388 | 0.986127 | NA       |
| 20185 | SNORA13   | 0.017745983 | -0.050669526 | 2.91407  | -0.017388 | 0.986127 | NA       |
| 20199 | SNORA42   | 0.019228816 | -0.050669526 | 2.91407  | -0.017388 | 0.986127 | NA       |
| 20216 | SNORA84   | 0.018603915 | -0.050669526 | 2.91407  | -0.017388 | 0.986127 | NA       |
| 20436 | SPANXN5   | 0.017886404 | -0.050669526 | 2.91407  | -0.017388 | 0.986127 | NA       |
| 20459 | TMEM225   | 0.017194806 | -0.050669526 | 2.91407  | -0.017388 | 0.986127 | NA       |
| 20461 | MPRSS111  | 0.017951967 | -0.050669526 | 2.91407  | -0.017388 | 0.986127 | NA       |
| 20501 | ZNF735    | 0.01798535  | -0.050669526 | 2.91407  | -0.017388 | 0.986127 | NA       |
| 19896 | LST-3TM12 | 0.018763731 | -0.050669526 | 2.91407  | -0.017388 | 0.986127 | NA       |
| 20468 | TSPY1     | 0.01875157  | -0.050669526 | 2.91407  | -0.017388 | 0.986127 | NA       |
| 19647 | CARTPT    | 0.018766443 | -0.050669526 | 2.91407  | -0.017388 | 0.986127 | NA       |
| 19834 | KRTAP3-1  | 0.018536526 | -0.050669526 | 2.91407  | -0.017388 | 0.986127 | NA       |
| 20104 | PGLYRP3   | 0.018453589 | -0.050669526 | 2.91407  | -0.017388 | 0.986127 | NA       |
| 17040 | NCDN      | 594.6628019 | -0.050850439 | 0.118177 | -0.430289 | 0.666985 | 0.767229 |

|       |           |             |              |          |           |          |          |
|-------|-----------|-------------|--------------|----------|-----------|----------|----------|
| 17780 | FRMD6     | 475.411509  | -0.05099691  | 0.204454 | -0.24943  | 0.803028 | 0.885273 |
| 17468 | ZNF815    | 25.90761181 | -0.051243244 | 0.158948 | -0.32239  | 0.747157 | 0.838392 |
| 17951 | OM121L10  | 9.312970655 | -0.051316774 | 0.236668 | -0.21683  | 0.828341 | 0.904503 |
| 18270 | PTN       | 343.0818358 | -0.051497001 | 0.345803 | -0.14892  | 0.881617 | 0.945844 |
| 17505 | GLIS2     | 1573.458601 | -0.051830136 | 0.165007 | -0.314109 | 0.753438 | 0.843682 |
| 17511 | ARSG      | 154.2293541 | -0.051879264 | 0.165859 | -0.312791 | 0.75444  | 0.844447 |
| 17129 | LUZP6     | 5007.384858 | -0.052017856 | 0.128714 | -0.404134 | 0.686114 | 0.785162 |
| 16995 | MICALL1   | 566.358517  | -0.052140896 | 0.118294 | -0.440774 | 0.659377 | 0.760485 |
| 17828 | NMUR1     | 58.27375047 | -0.052392114 | 0.218012 | -0.240318 | 0.810084 | 0.890647 |
| 17736 | LIMS2     | 629.8620939 | -0.052519888 | 0.202656 | -0.259157 | 0.795514 | 0.879165 |
| 17387 | HD1-EIF4I | 874.8885338 | -0.05260895  | 0.152756 | -0.344398 | 0.730547 | 0.82355  |
| 18277 | SAMD11    | 109.7241935 | -0.052694333 | 0.357705 | -0.147312 | 0.882886 | 0.946791 |
| 18033 | C9orf163  | 8.881018222 | -0.052749382 | 0.264591 | -0.199362 | 0.841979 | 0.915191 |
| 16071 | XPNPEP1   | 1273.625654 | -0.052752552 | 0.076281 | -0.691558 | 0.489215 | 0.596671 |
| 17377 | TMEM175   | 371.4824919 | -0.052865562 | 0.152437 | -0.346803 | 0.728739 | 0.822007 |
| 15906 | BMS1      | 1021.252359 | -0.052870235 | 0.071355 | -0.740947 | 0.458726 | 0.565309 |
| 17351 | PCGF6     | 154.8650081 | -0.052881736 | 0.149989 | -0.352571 | 0.72441  | 0.818349 |
| 17194 | PCNXL3    | 1079.869083 | -0.052964296 | 0.136261 | -0.388696 | 0.697501 | 0.79512  |
| 16705 | MED24     | 1211.694828 | -0.053069737 | 0.102578 | -0.517359 | 0.604906 | 0.709773 |
| 17232 | VAT1      | 6884.152379 | -0.053403345 | 0.140184 | -0.380951 | 0.703239 | 0.799918 |
| 16498 | ZNFX1     | 1915.149944 | -0.05341081  | 0.093058 | -0.573952 | 0.566001 | 0.672456 |
| 18086 | KANK4     | 31.00457547 | -0.053514237 | 0.284645 | -0.188003 | 0.850874 | 0.922098 |
| 17524 | STS       | 901.8488438 | -0.053563268 | 0.172986 | -0.309639 | 0.756836 | 0.846538 |
| 16707 | CHRAC1    | 793.9268123 | -0.053676977 | 0.103855 | -0.516844 | 0.605265 | 0.709986 |
| 16497 | RABGEF1   | 1046.607559 | -0.053691189 | 0.093546 | -0.573957 | 0.565997 | 0.672456 |
| 18290 | PCDHGB2   | 156.2105    | -0.053742835 | 0.369428 | -0.145476 | 0.884335 | 0.947723 |
| 16621 | GEMIN5    | 687.9149906 | -0.053743286 | 0.099027 | -0.542714 | 0.587327 | 0.69263  |
| 17815 | RNLS      | 415.1522612 | -0.053789962 | 0.221008 | -0.243384 | 0.807708 | 0.888682 |
| 16793 | ZNF574    | 360.7329946 | -0.054044528 | 0.109976 | -0.491421 | 0.623129 | 0.727339 |
| 17541 | SLC20A1   | 1267.863768 | -0.054371851 | 0.178526 | -0.304559 | 0.760702 | 0.850038 |
| 17616 | LOC644538 | 251.9841555 | -0.05440101  | 0.187529 | -0.290094 | 0.771745 | 0.858687 |
| 16817 | IGHMBP2   | 291.9814058 | -0.054899348 | 0.112826 | -0.486583 | 0.626554 | 0.730278 |
| 17340 | FAIM      | 285.494173  | -0.054977689 | 0.15353  | -0.358091 | 0.720275 | 0.814205 |
| 17070 | TAF6L     | 223.1693971 | -0.055037718 | 0.130643 | -0.421283 | 0.673548 | 0.773417 |
| 17109 | MESDC1    | 553.7945313 | -0.055214912 | 0.134812 | -0.409569 | 0.682122 | 0.781477 |
| 16758 | CIZ1      | 1483.374673 | -0.055329184 | 0.110251 | -0.501849 | 0.615774 | 0.720197 |
| 16977 | LOC200030 | 424.7068855 | -0.055501032 | 0.1249   | -0.444365 | 0.656779 | 0.758271 |
| 17229 | TIMM13    | 849.8993684 | -0.055669733 | 0.145785 | -0.381863 | 0.702563 | 0.799288 |
| 18079 | ARSE      | 1663.307932 | -0.055688214 | 0.292369 | -0.190473 | 0.848939 | 0.920408 |
| 17532 | PBX3      | 430.7712415 | -0.055745865 | 0.181361 | -0.307374 | 0.758558 | 0.848078 |
| 17660 | ARPM1     | 36.84951222 | -0.055913224 | 0.201437 | -0.277571 | 0.781342 | 0.867218 |
| 18535 | SLC2A7    | 0.477115544 | -0.05595048  | 0.540927 | -0.103434 | 0.917618 | 0.970393 |
| 17924 | HRC       | 138.4350175 | -0.056264706 | 0.251488 | -0.223727 | 0.82297  | 0.899968 |
| 16457 | LTA4H     | 2241.877169 | -0.056329629 | 0.09622  | -0.585428 | 0.55826  | 0.664912 |
| 18321 | GTF2A1L   | 7.907417518 | -0.056359511 | 0.400509 | -0.14072  | 0.888091 | 0.950138 |
| 18363 | CCDC78    | 50.25236453 | -0.056467782 | 0.416403 | -0.135609 | 0.892131 | 0.952276 |
| 18228 | CMTM5     | 1.591029219 | -0.056660459 | 0.363253 | -0.155981 | 0.876048 | 0.941374 |

|       |           |             |              |          |           |          |          |
|-------|-----------|-------------|--------------|----------|-----------|----------|----------|
| 16469 | PTPMT1    | 663.8875494 | -0.056801076 | 0.097603 | -0.581957 | 0.560595 | 0.667208 |
| 17723 | C1orf133  | 48.06915558 | -0.057182336 | 0.218298 | -0.261947 | 0.793362 | 0.87743  |
| 16289 | COPB2     | 3316.716788 | -0.05738265  | 0.09087  | -0.63148  | 0.527727 | 0.635028 |
| 16756 | RFFL      | 823.962288  | -0.057578326 | 0.114328 | -0.503624 | 0.614526 | 0.718866 |
| 15602 | SPPL3     | 1353.379562 | -0.057662021 | 0.069075 | -0.83478  | 0.403842 | 0.507352 |
| 16843 | TARS2     | 555.37513   | -0.057698287 | 0.120282 | -0.479692 | 0.631446 | 0.734801 |
| 17277 | LAMB2     | 6930.732859 | -0.057748016 | 0.154805 | -0.373038 | 0.70912  | 0.804471 |
| 17627 | TIE1      | 1353.347477 | -0.057764229 | 0.201023 | -0.287351 | 0.773844 | 0.860505 |
| 17705 | CATSPER2  | 32.33156424 | -0.057769803 | 0.217187 | -0.265991 | 0.790246 | 0.874872 |
| 17005 | ZSWIM3    | 98.21155539 | -0.05786557  | 0.131983 | -0.438433 | 0.661073 | 0.761993 |
| 16526 | MNT       | 553.0888235 | -0.057904843 | 0.102464 | -0.565124 | 0.571989 | 0.678396 |
| 15927 | KCTD10    | 1973.642787 | -0.058081161 | 0.079043 | -0.734801 | 0.462461 | 0.569104 |
| 17024 | HLA-E     | 15327.71288 | -0.058098491 | 0.133337 | -0.435727 | 0.663035 | 0.763402 |
| 17662 | AURKAPS1  | 9.736714653 | -0.058217689 | 0.210443 | -0.276644 | 0.782054 | 0.867861 |
| 18085 | LOC643675 | 6.894750549 | -0.058266895 | 0.309193 | -0.188448 | 0.850525 | 0.921822 |
| 18140 | HAL       | 5.768561326 | -0.058331069 | 0.330509 | -0.176488 | 0.85991  | 0.929206 |
| 16737 | NRBF2     | 427.4804619 | -0.058370388 | 0.114556 | -0.509537 | 0.610376 | 0.714822 |
| 18193 | GPD1      | 1534.102046 | -0.058639133 | 0.358058 | -0.16377  | 0.869912 | 0.937237 |
| 16674 | HARBI1    | 61.38863078 | -0.058900833 | 0.111781 | -0.526933 | 0.59824  | 0.703279 |
| 16145 | TMEM69    | 471.6897268 | -0.058934425 | 0.088331 | -0.667203 | 0.504643 | 0.612667 |
| 17035 | KCTD11    | 729.3386399 | -0.058955669 | 0.136231 | -0.432762 | 0.665188 | 0.765372 |
| 17670 | PCDH12    | 1271.144902 | -0.05913234  | 0.214576 | -0.275577 | 0.782873 | 0.868426 |
| 17999 | DLEC1     | 6.901381197 | -0.059155194 | 0.287067 | -0.206068 | 0.836738 | 0.911256 |
| 16766 | UPF3B     | 224.8208962 | -0.059194944 | 0.118558 | -0.49929  | 0.617575 | 0.722002 |
| 18173 | HNF4A     | 1002.907455 | -0.05955401  | 0.350853 | -0.169741 | 0.865214 | 0.93315  |
| 15428 | SMARCC2   | 2613.590297 | -0.059588957 | 0.067641 | -0.88096  | 0.37834  | 0.480674 |
| 16875 | SCAMP4    | 1157.615317 | -0.059628011 | 0.126385 | -0.471797 | 0.637071 | 0.739984 |
| 17338 | PITPNM1   | 808.2824977 | -0.059658185 | 0.166535 | -0.358232 | 0.72017  | 0.814168 |
| 16601 | YWHAQ     | 6473.543561 | -0.059690671 | 0.108858 | -0.548333 | 0.583463 | 0.688909 |
| 17809 | HSN2      | 20.13397999 | -0.059795982 | 0.244222 | -0.244843 | 0.806578 | 0.887739 |
| 15881 | WDR53     | 128.7469355 | -0.060103355 | 0.08028  | -0.748668 | 0.454057 | 0.560417 |
| 16720 | GATAD1    | 1357.816997 | -0.060120429 | 0.116726 | -0.515057 | 0.606513 | 0.711021 |
| 16629 | MAGED2    | 5160.214354 | -0.060142884 | 0.111096 | -0.541361 | 0.588259 | 0.693394 |
| 18082 | HRASLS2   | 14.76575052 | -0.060224663 | 0.317452 | -0.189713 | 0.849534 | 0.920901 |
| 17429 | PHKA2     | 2526.670496 | -0.060235596 | 0.181282 | -0.332275 | 0.739681 | 0.83186  |
| 18076 | ALS2CR11  | 11.54810566 | -0.060447595 | 0.314755 | -0.192047 | 0.847706 | 0.919223 |
| 16916 | ZNF653    | 118.6457366 | -0.060703729 | 0.131831 | -0.460465 | 0.645182 | 0.747589 |
| 16288 | NUP107    | 704.6349316 | -0.06072972  | 0.096153 | -0.631593 | 0.527653 | 0.634978 |
| 17259 | C15orf34  | 16.56216734 | -0.060737704 | 0.161906 | -0.375142 | 0.707555 | 0.803475 |
| 17732 | PRCD      | 11.26285189 | -0.060801465 | 0.233857 | -0.259994 | 0.794868 | 0.87865  |
| 16540 | EHMT1     | 814.4885797 | -0.060814977 | 0.108097 | -0.562596 | 0.57371  | 0.679919 |
| 16062 | MSL1      | 1228.953055 | -0.060922598 | 0.087747 | -0.694298 | 0.487495 | 0.594907 |
| 16625 | CKAP5     | 1662.943387 | -0.061003643 | 0.112478 | -0.542363 | 0.587569 | 0.692748 |
| 17179 | LPCAT3    | 2717.580375 | -0.061380546 | 0.156672 | -0.391778 | 0.695222 | 0.793193 |
| 16918 | TUFM      | 3929.753227 | -0.061392128 | 0.133541 | -0.459723 | 0.645715 | 0.748118 |
| 16886 | RPS3A     | 5589.380355 | -0.061490471 | 0.131298 | -0.468326 | 0.639551 | 0.742381 |
| 17224 | ABHD8     | 251.2251662 | -0.061698227 | 0.161232 | -0.382667 | 0.701966 | 0.798749 |

|       |           |             |              |          |           |          |          |
|-------|-----------|-------------|--------------|----------|-----------|----------|----------|
| 16059 | SNRNP40   | 459.2259909 | -0.061822118 | 0.088888 | -0.695502 | 0.486741 | 0.594097 |
| 16646 | C2orf29   | 1204.515378 | -0.061944148 | 0.115691 | -0.535428 | 0.592354 | 0.69743  |
| 16973 | AHNAK     | 31291.59623 | -0.062035478 | 0.139603 | -0.444372 | 0.656774 | 0.758271 |
| 16673 | DAG1      | 2480.293546 | -0.062256906 | 0.118156 | -0.526905 | 0.598259 | 0.703279 |
| 17020 | MCL1      | 9839.891825 | -0.062627574 | 0.143634 | -0.436022 | 0.66282  | 0.763241 |
| 15810 | GOSR2     | 1194.819543 | -0.062843248 | 0.081256 | -0.773394 | 0.439289 | 0.544624 |
| 17704 | FAM69B    | 238.4671239 | -0.062954783 | 0.236495 | -0.2662   | 0.790085 | 0.874744 |
| 16663 | RAB11B    | 1968.63365  | -0.063063129 | 0.118842 | -0.530646 | 0.595664 | 0.700691 |
| 17955 | RICH2     | 374.2886435 | -0.063119064 | 0.29227  | -0.215961 | 0.829018 | 0.905017 |
| 16117 | TRA2A     | 1090.956984 | -0.063125857 | 0.093362 | -0.676141 | 0.498951 | 0.606846 |
| 16628 | MPRIIP    | 2281.646399 | -0.0632406   | 0.116728 | -0.541775 | 0.587973 | 0.6931   |
| 16267 | RBM15     | 155.0864104 | -0.063702373 | 0.100142 | -0.636118 | 0.524699 | 0.632239 |
| 16763 | MTDH      | 3817.142602 | -0.063761069 | 0.127565 | -0.49983  | 0.617195 | 0.721687 |
| 17491 | DTX3      | 542.1812354 | -0.063985269 | 0.202092 | -0.316614 | 0.751536 | 0.842197 |
| 16121 | WDR75     | 744.135234  | -0.064022909 | 0.094811 | -0.675266 | 0.499507 | 0.607334 |
| 17540 | INTS4L1   | 25.01134068 | -0.064030617 | 0.209899 | -0.305054 | 0.760325 | 0.849665 |
| 17120 | ETFB      | 1780.303945 | -0.064125504 | 0.157883 | -0.406159 | 0.684626 | 0.783841 |
| 15433 | DPF2      | 939.4433119 | -0.064274695 | 0.073185 | -0.878249 | 0.379808 | 0.482352 |
| 17523 | ITGA7     | 764.8378388 | -0.064301164 | 0.207385 | -0.310057 | 0.756518 | 0.846231 |
| 16025 | NFYB      | 682.2457332 | -0.064350695 | 0.091484 | -0.703413 | 0.481799 | 0.589313 |
| 17730 | CDKN1C    | 391.7963687 | -0.064363305 | 0.247132 | -0.260441 | 0.794523 | 0.878367 |
| 17574 | MURC      | 9.544334014 | -0.064382409 | 0.215704 | -0.298476 | 0.76534  | 0.853615 |
| 18614 | TSIX      | 74.97818493 | -0.064392825 | 0.674575 | -0.095457 | 0.923952 | 0.972944 |
| 16342 | TRIM8     | 2438.532151 | -0.064548987 | 0.104887 | -0.615412 | 0.538283 | 0.645663 |
| 16256 | ACTL6A    | 695.3913719 | -0.064976844 | 0.101788 | -0.638355 | 0.523243 | 0.630903 |
| 18135 | OC1001285 | 0.847705254 | -0.065025656 | 0.366116 | -0.17761  | 0.85903  | 0.928472 |
| 16686 | FBXW4     | 1250.291638 | -0.065131781 | 0.124855 | -0.521659 | 0.601908 | 0.707059 |
| 16235 | CIR1      | 904.1590394 | -0.0651838   | 0.101059 | -0.645009 | 0.518921 | 0.626509 |
| 17073 | C10orf78  | 184.4027401 | -0.065551398 | 0.156007 | -0.420183 | 0.674351 | 0.774162 |
| 18112 | SLC6A17   | 38.0590533  | -0.065607251 | 0.36173  | -0.181371 | 0.856077 | 0.92649  |
| 18360 | CRTAC1    | 219.462667  | -0.065627866 | 0.482651 | -0.135974 | 0.891842 | 0.952074 |
| 17286 | LETM2     | 58.46028912 | -0.065757244 | 0.177037 | -0.371432 | 0.710316 | 0.805397 |
| 16224 | RBM19     | 618.6372164 | -0.065803616 | 0.101446 | -0.648658 | 0.516559 | 0.62408  |
| 17895 | GPX3      | 56720.58238 | -0.065825619 | 0.288393 | -0.228249 | 0.819452 | 0.897441 |
| 15684 | EBNA1BP2  | 844.2698111 | -0.066107678 | 0.081431 | -0.811823 | 0.416893 | 0.52101  |
| 18022 | SCN9A     | 371.8759409 | -0.066197665 | 0.327995 | -0.201825 | 0.840053 | 0.913655 |
| 18279 | C9orf70   | 0.677223764 | -0.066221431 | 0.449741 | -0.147244 | 0.88294  | 0.946797 |
| 16396 | PGBD2     | 120.3326967 | -0.066290002 | 0.110093 | -0.602126 | 0.54709  | 0.654032 |
| 16132 | DPH2      | 358.6552767 | -0.066295996 | 0.098608 | -0.672318 | 0.501382 | 0.609198 |
| 16019 | TMEM5     | 366.1578232 | -0.066459179 | 0.094203 | -0.705488 | 0.480507 | 0.587952 |
| 16127 | HDAC8     | 262.3134443 | -0.066741023 | 0.099139 | -0.673205 | 0.500817 | 0.608698 |
| 18103 | HSD17B6   | 25.60038413 | -0.06695429  | 0.364545 | -0.183665 | 0.854276 | 0.924966 |
| 16773 | PI4K2A    | 834.1522073 | -0.067055992 | 0.134737 | -0.497681 | 0.618709 | 0.722993 |
| 16385 | C7orf11   | 435.7467455 | -0.067118488 | 0.111175 | -0.603717 | 0.546032 | 0.653205 |
| 16861 | SLC39A6   | 1823.632272 | -0.067140297 | 0.1411   | -0.475835 | 0.634192 | 0.737238 |
| 16600 | VAMP8     | 2483.773955 | -0.067257026 | 0.122646 | -0.548386 | 0.583427 | 0.688909 |
| 17200 | ABCA2     | 1573.382978 | -0.067272241 | 0.173665 | -0.387367 | 0.698484 | 0.795988 |



|       |          |             |              |          |           |          |          |
|-------|----------|-------------|--------------|----------|-----------|----------|----------|
| 17269 | NT5C3    | 823.1331225 | -0.067274233 | 0.179741 | -0.374283 | 0.708193 | 0.803799 |
| 17320 | AP1S3    | 474.8187418 | -0.067281115 | 0.185835 | -0.362047 | 0.717317 | 0.811763 |
| 16800 | CCDC9    | 402.8134909 | -0.067586969 | 0.137956 | -0.489916 | 0.624193 | 0.728263 |
| 15833 | TMEM50A  | 2860.098981 | -0.06761872  | 0.088399 | -0.764927 | 0.444315 | 0.550055 |
| 16637 | MAP7D3   | 415.4337195 | -0.06776294  | 0.125816 | -0.538586 | 0.590172 | 0.695274 |
| 17191 | FLJ39582 | 52.41903088 | -0.067768981 | 0.174179 | -0.389077 | 0.697219 | 0.794962 |
| 17470 | SAMD9L   | 1206.436363 | -0.06800962  | 0.211062 | -0.322225 | 0.747282 | 0.838436 |
| 17940 | GDF3     | 9.784706585 | -0.068082143 | 0.309232 | -0.220165 | 0.825742 | 0.902195 |
| 18356 | TMEM14E  | 0.583810512 | -0.068112648 | 0.49735  | -0.136951 | 0.891069 | 0.952033 |
| 16252 | TMEM110  | 136.9825218 | -0.068122313 | 0.106485 | -0.639735 | 0.522345 | 0.629983 |
| 15091 | ERCC3    | 887.6659636 | -0.068128393 | 0.069653 | -0.978118 | 0.328016 | 0.426045 |
| 16750 | GTF3C6   | 1127.571459 | -0.068172937 | 0.134996 | -0.504999 | 0.613559 | 0.717993 |
| 16250 | ACTR3    | 4668.181708 | -0.068215568 | 0.106533 | -0.640321 | 0.521964 | 0.629601 |
| 15214 | XRCC6    | 5371.237778 | -0.068300186 | 0.072333 | -0.944249 | 0.345042 | 0.444536 |
| 17173 | HEG1     | 2786.787767 | -0.068526224 | 0.174169 | -0.393447 | 0.69399  | 0.792109 |
| 16125 | WDR77    | 620.7417656 | -0.068538647 | 0.101618 | -0.674476 | 0.500008 | 0.607817 |
| 15175 | SEC24C   | 2664.3792   | -0.068548553 | 0.071795 | -0.954787 | 0.339686 | 0.43876  |
| 16867 | MPP1     | 1203.681118 | -0.068568955 | 0.144688 | -0.473911 | 0.635564 | 0.73854  |
| 16345 | RRS1     | 345.3520962 | -0.068702442 | 0.11168  | -0.615172 | 0.538441 | 0.645701 |
| 16140 | C22orf13 | 3054.210134 | -0.0687648   | 0.102795 | -0.668953 | 0.503525 | 0.611499 |
| 17368 | SPOCK2   | 2194.394733 | -0.068892332 | 0.197563 | -0.348711 | 0.727306 | 0.820816 |
| 15551 | APH1A    | 3725.701861 | -0.069047294 | 0.081622 | -0.845942 | 0.397585 | 0.50113  |
| 17400 | TTL9     | 8.354126835 | -0.069602232 | 0.203731 | -0.341638 | 0.732623 | 0.825296 |
| 15339 | GATAD2A  | 1548.930249 | -0.06995739  | 0.076974 | -0.908847 | 0.363431 | 0.464411 |
| 16471 | RGL2     | 1027.358617 | -0.069964917 | 0.120371 | -0.581242 | 0.561077 | 0.667699 |
| 16219 | MANBA    | 1162.668914 | -0.069985879 | 0.107788 | -0.64929  | 0.516151 | 0.623741 |
| 16960 | SNAPC4   | 233.5994386 | -0.069995857 | 0.155612 | -0.449811 | 0.652847 | 0.754655 |
| 17250 | JAM3     | 1052.056513 | -0.0704307   | 0.186689 | -0.377261 | 0.705979 | 0.802208 |
| 18653 | MYH13    | 3.857981642 | -0.070458456 | 0.799772 | -0.088098 | 0.929799 | 0.977032 |
| 17948 | MUC5B    | 5.894011448 | -0.070516677 | 0.323768 | -0.2178   | 0.827585 | 0.903805 |
| 16178 | GORAB    | 197.6321995 | -0.07071519  | 0.107134 | -0.66006  | 0.509215 | 0.616926 |
| 16244 | PMS2L5   | 52.53759377 | -0.070728971 | 0.110182 | -0.641931 | 0.520918 | 0.628572 |
| 16184 | ZNF74    | 185.4770403 | -0.07080652  | 0.107657 | -0.657704 | 0.510728 | 0.618561 |
| 15556 | PARP16   | 334.1002226 | -0.070855463 | 0.08382  | -0.845333 | 0.397925 | 0.501421 |
| 17251 | CCDC88C  | 407.3097327 | -0.071063712 | 0.188409 | -0.377178 | 0.706041 | 0.802221 |
| 15072 | ZKSCAN5  | 401.8442213 | -0.071079891 | 0.072135 | -0.985372 | 0.324441 | 0.421933 |
| 16978 | NPHP4    | 211.0826786 | -0.071174628 | 0.160196 | -0.444298 | 0.656827 | 0.758271 |
| 17256 | PIK3R1   | 2480.266227 | -0.0712934   | 0.189761 | -0.375702 | 0.707139 | 0.803235 |
| 14808 | ADIPOR1  | 2748.394331 | -0.071369986 | 0.067148 | -1.062874 | 0.287839 | 0.381006 |
| 17579 | FOXD4L1  | 6.290074928 | -0.071451691 | 0.240151 | -0.297528 | 0.766064 | 0.854179 |
| 16026 | KIAA1429 | 1320.264468 | -0.071522571 | 0.101763 | -0.702835 | 0.482159 | 0.589716 |
| 16200 | TSPAN31  | 1534.525361 | -0.071598826 | 0.109475 | -0.654018 | 0.5131   | 0.62082  |
| 17417 | EPDR1    | 1650.83352  | -0.071716274 | 0.212527 | -0.337445 | 0.735782 | 0.828034 |
| 15494 | MMS19    | 957.6684618 | -0.071716754 | 0.083053 | -0.863507 | 0.387859 | 0.490668 |
| 15430 | SPATA2   | 395.483843  | -0.071828138 | 0.081572 | -0.880546 | 0.378563 | 0.480896 |
| 17864 | ITGA10   | 115.3559173 | -0.071945747 | 0.306379 | -0.234826 | 0.814344 | 0.893544 |
| 18294 | NPHS1    | 12.48780045 | -0.07198106  | 0.496773 | -0.144897 | 0.884792 | 0.948005 |

|       |          |             |              |          |           |          |          |
|-------|----------|-------------|--------------|----------|-----------|----------|----------|
| 15874 | MRPL33   | 494.6215831 | -0.072273501 | 0.09631  | -0.750429 | 0.452996 | 0.559354 |
| 18622 | DCYAP1R  | 0.621624938 | -0.072326913 | 0.774265 | -0.093414 | 0.925575 | 0.974235 |
| 15297 | RAB1F    | 289.5567085 | -0.072462514 | 0.078632 | -0.921534 | 0.356772 | 0.457154 |
| 15682 | RBM15B   | 1127.488984 | -0.072500324 | 0.089253 | -0.812305 | 0.416617 | 0.520731 |
| 16111 | IRF2     | 936.7582126 | -0.072512453 | 0.107097 | -0.677072 | 0.49836  | 0.606316 |
| 15318 | TH1L     | 1472.526169 | -0.072675306 | 0.079349 | -0.91589  | 0.359724 | 0.460305 |
| 18007 | PCDHGA9  | 170.4310605 | -0.072856112 | 0.355946 | -0.204683 | 0.83782  | 0.912009 |
| 15950 | TMEM39A  | 543.9575701 | -0.072859024 | 0.100284 | -0.726529 | 0.467514 | 0.574494 |
| 16948 | TPM1     | 8767.071308 | -0.073092897 | 0.162203 | -0.450627 | 0.652259 | 0.754362 |
| 17023 | TP53I11  | 2559.33009  | -0.073209535 | 0.1679   | -0.43603  | 0.662815 | 0.763241 |
| 18260 | DSG1     | 1.64185989  | -0.073328432 | 0.488487 | -0.150113 | 0.880675 | 0.945351 |
| 15371 | SRP68    | 1886.496689 | -0.07348601  | 0.081756 | -0.898844 | 0.368736 | 0.47021  |
| 16660 | C1orf31  | 340.6928974 | -0.073567469 | 0.138424 | -0.531466 | 0.595096 | 0.700149 |
| 15737 | ING1     | 319.6895367 | -0.073580869 | 0.09274  | -0.793413 | 0.427537 | 0.532513 |
| 16137 | TOMM34   | 813.945678  | -0.07368611  | 0.109911 | -0.670418 | 0.502592 | 0.610479 |
| 17882 | FLJ33360 | 5.029483973 | -0.073948106 | 0.321114 | -0.230286 | 0.817869 | 0.896441 |
| 15547 | PIP4K2B  | 1878.209411 | -0.074015543 | 0.087408 | -0.846784 | 0.397116 | 0.500667 |
| 18299 | C6orf176 | 16.00976284 | -0.074213486 | 0.51599  | -0.143827 | 0.885637 | 0.948651 |
| 16786 | SGK223   | 349.3889982 | -0.074251199 | 0.150561 | -0.493162 | 0.621898 | 0.72619  |
| 16990 | BTG2     | 2592.723829 | -0.074390175 | 0.168378 | -0.441805 | 0.65863  | 0.759848 |
| 17262 | MAPK13   | 488.06904   | -0.074415598 | 0.198422 | -0.375037 | 0.707633 | 0.803517 |
| 17311 | FAM111B  | 99.7784867  | -0.07453619  | 0.204584 | -0.364331 | 0.715611 | 0.810276 |
| 17753 | ALDH3A1  | 28.12985921 | -0.074596995 | 0.291767 | -0.255673 | 0.798203 | 0.881199 |
| 14921 | ABT1     | 492.2080723 | -0.074625279 | 0.072454 | -1.029963 | 0.303027 | 0.398046 |
| 15470 | SELS     | 1017.44765  | -0.074891312 | 0.086055 | -0.870276 | 0.38415  | 0.48673  |
| 17961 | FLJ14107 | 1.183361089 | -0.074960872 | 0.349098 | -0.214727 | 0.82998  | 0.905728 |
| 17586 | AGAP8    | 29.43970063 | -0.074962294 | 0.252824 | -0.2965   | 0.766848 | 0.854665 |
| 16680 | PTPN12   | 2507.549223 | -0.074984684 | 0.143029 | -0.524262 | 0.600097 | 0.705185 |
| 16482 | ASMTL    | 619.754462  | -0.075080009 | 0.130136 | -0.576934 | 0.563984 | 0.670711 |
| 17181 | NRARP    | 440.8304618 | -0.075097242 | 0.192063 | -0.391003 | 0.695795 | 0.7938   |
| 15686 | ASXL1    | 1739.338159 | -0.075243563 | 0.092758 | -0.811186 | 0.417259 | 0.521401 |
| 16994 | DAPK1    | 1517.810498 | -0.075449514 | 0.171117 | -0.440925 | 0.659268 | 0.760404 |
| 16718 | TMEM48   | 208.3604079 | -0.075579164 | 0.146641 | -0.515404 | 0.606271 | 0.71087  |
| 17175 | C17orf51 | 183.0441878 | -0.075653477 | 0.192649 | -0.392701 | 0.69454  | 0.792599 |
| 15277 | NAIF1    | 162.2476104 | -0.075728516 | 0.081759 | -0.926241 | 0.354321 | 0.454608 |
| 16652 | MAP1D    | 67.83862306 | -0.075895911 | 0.142216 | -0.533667 | 0.593572 | 0.698691 |
| 17099 | C19orf25 | 491.3397874 | -0.076126892 | 0.183897 | -0.413964 | 0.6789   | 0.77824  |
| 17281 | BEND5    | 177.6803239 | -0.076148346 | 0.204656 | -0.37208  | 0.709834 | 0.805083 |
| 18211 | PPEF2    | 0.789833715 | -0.076161104 | 0.47703  | -0.159657 | 0.873152 | 0.939811 |
| 16311 | CXorf40A | 435.7369896 | -0.076182016 | 0.12189  | -0.625007 | 0.531966 | 0.639266 |
| 16525 | PIN1     | 694.619597  | -0.076913481 | 0.136064 | -0.565276 | 0.571886 | 0.678338 |
| 15796 | FNTB     | 630.7244592 | -0.077148491 | 0.099295 | -0.776964 | 0.43718  | 0.54249  |
| 16404 | PASK     | 165.39068   | -0.077206615 | 0.128614 | -0.600298 | 0.548308 | 0.655168 |
| 14556 | NRF1     | 325.9713725 | -0.077225168 | 0.067216 | -1.148918 | 0.25059  | 0.337442 |
| 16105 | C18orf21 | 242.6540453 | -0.077408598 | 0.113834 | -0.680014 | 0.496495 | 0.604272 |
| 16101 | MCRS1    | 965.0404757 | -0.077492707 | 0.113788 | -0.681028 | 0.495854 | 0.603641 |
| 15546 | CTTN     | 3901.360264 | -0.077580263 | 0.091604 | -0.846912 | 0.397044 | 0.500609 |

|       |           |             |              |          |           |          |          |
|-------|-----------|-------------|--------------|----------|-----------|----------|----------|
| 16417 | OSTC      | 1966.601071 | -0.077659558 | 0.129746 | -0.598549 | 0.549474 | 0.656041 |
| 17612 | TMEM169   | 74.13553943 | -0.07799844  | 0.268103 | -0.290927 | 0.771107 | 0.858192 |
| 17741 | LOC619207 | 27.62982684 | -0.07852081  | 0.304811 | -0.257605 | 0.796712 | 0.880241 |
| 15986 | CCT4      | 3357.290076 | -0.078584874 | 0.109747 | -0.716055 | 0.473957 | 0.581136 |
| 16492 | FBRSL1    | 465.5039049 | -0.078618177 | 0.136772 | -0.574813 | 0.565418 | 0.672008 |
| 17242 | PLGLB2    | 43.97376732 | -0.078642889 | 0.207807 | -0.378442 | 0.705102 | 0.801572 |
| 16802 | FAM22A    | 22.78488714 | -0.07874352  | 0.161015 | -0.489045 | 0.62481  | 0.728872 |
| 14762 | KIAA0406  | 666.6734018 | -0.078771561 | 0.072857 | -1.081175 | 0.279619 | 0.371279 |
| 15886 | PCIF1     | 927.4392657 | -0.078839896 | 0.105556 | -0.746905 | 0.455121 | 0.561553 |
| 15337 | KPNB1     | 4022.381395 | -0.078961186 | 0.086815 | -0.909534 | 0.363068 | 0.464009 |
| 17288 | C6orf26   | 45.14510975 | -0.079100383 | 0.213205 | -0.371006 | 0.710633 | 0.80571  |
| 16804 | ARHGEF5   | 421.5328584 | -0.079325014 | 0.162256 | -0.488889 | 0.62492  | 0.72888  |
| 18530 | SLC6A14   | 0.657758606 | -0.079326921 | 0.76321  | -0.103938 | 0.917218 | 0.970232 |
| 16651 | CDC42EP3  | 581.1947723 | -0.079451661 | 0.148728 | -0.534207 | 0.593199 | 0.698294 |
| 17128 | ID7-PLA2C | 318.7233797 | -0.079465658 | 0.196649 | -0.404098 | 0.68614  | 0.785162 |
| 14966 | MLX       | 1083.133384 | -0.079512676 | 0.078135 | -1.017629 | 0.308855 | 0.404507 |
| 15853 | AKT1      | 2656.281816 | -0.079527359 | 0.105128 | -0.75648  | 0.449362 | 0.555565 |
| 16228 | KLHDC3    | 1502.488321 | -0.079535209 | 0.122943 | -0.646926 | 0.51768  | 0.62528  |
| 15619 | TLE3      | 1297.734632 | -0.07957624  | 0.095885 | -0.829914 | 0.406587 | 0.510245 |
| 18271 | SLC6A20   | 111.6218455 | -0.079797677 | 0.537673 | -0.148413 | 0.882017 | 0.946172 |
| 18081 | F10       | 283.7487193 | -0.079818747 | 0.420119 | -0.189991 | 0.849316 | 0.920715 |
| 17155 | ELOVL6    | 344.4674004 | -0.079833584 | 0.201023 | -0.397137 | 0.691266 | 0.789828 |
| 14731 | FAM192A   | 1241.871189 | -0.079836101 | 0.073285 | -1.089393 | 0.275981 | 0.367219 |
| 15368 | GPATCH3   | 245.8542328 | -0.079872617 | 0.088775 | -0.899717 | 0.368271 | 0.469708 |
| 16550 | EEF1A1P9  | 7429.577572 | -0.079931532 | 0.143013 | -0.558912 | 0.576222 | 0.682463 |
| 16486 | PAN2      | 951.9670938 | -0.07993412  | 0.138786 | -0.575954 | 0.564646 | 0.671349 |
| 15844 | SLC39A7   | 2631.174187 | -0.079976159 | 0.105151 | -0.760582 | 0.446907 | 0.552879 |
| 16323 | TMEM99    | 296.5850661 | -0.080065132 | 0.128774 | -0.62175  | 0.534107 | 0.641366 |
| 17974 | C21orf81  | 1.42415078  | -0.080285349 | 0.378583 | -0.212068 | 0.832054 | 0.907371 |
| 15861 | ZDHHC7    | 1370.493981 | -0.080496485 | 0.106587 | -0.755215 | 0.45012  | 0.556257 |
| 14884 | MAML1     | 957.096898  | -0.080641214 | 0.077428 | -1.041505 | 0.297641 | 0.391969 |
| 16577 | PAM       | 7039.289614 | -0.080765641 | 0.146175 | -0.552526 | 0.580588 | 0.686499 |
| 17522 | CPAMD8    | 133.4208764 | -0.080821288 | 0.260654 | -0.310071 | 0.756507 | 0.846231 |
| 15612 | ALG8      | 717.8412982 | -0.080970755 | 0.097291 | -0.83225  | 0.405268 | 0.508786 |
| 15640 | SGPL1     | 1917.988929 | -0.081044729 | 0.098275 | -0.824669 | 0.40956  | 0.513285 |
| 15855 | MRPS27    | 1551.493458 | -0.081117558 | 0.107255 | -0.756305 | 0.449466 | 0.555625 |
| 15609 | DPH5      | 396.6403678 | -0.081244648 | 0.097533 | -0.832996 | 0.404847 | 0.508386 |
| 16774 | PLA2G16   | 2447.97271  | -0.08131159  | 0.163385 | -0.497669 | 0.618717 | 0.722993 |
| 16704 | INCA1     | 19.44082964 | -0.081354899 | 0.157135 | -0.517739 | 0.604641 | 0.709504 |
| 16942 | SLC16A2   | 502.8704248 | -0.081455156 | 0.18037  | -0.4516   | 0.651557 | 0.753817 |
| 18101 | KCNK15    | 12.77391692 | -0.08147613  | 0.443267 | -0.183808 | 0.854164 | 0.924919 |
| 17081 | CCHCR1    | 635.978247  | -0.081585521 | 0.195613 | -0.417075 | 0.676623 | 0.776447 |
| 18330 | LOC146336 | 2.937458813 | -0.081597929 | 0.584687 | -0.139558 | 0.889009 | 0.950653 |
| 17209 | SCN1B     | 397.083946  | -0.081720501 | 0.211883 | -0.385687 | 0.699729 | 0.796989 |
| 17661 | DNAH5     | 134.1318597 | -0.081891783 | 0.295733 | -0.276911 | 0.781848 | 0.867731 |
| 14452 | EWSR1     | 3250.601855 | -0.081941934 | 0.069348 | -1.181597 | 0.237366 | 0.321935 |
| 14850 | ENSA      | 3010.14657  | -0.082075188 | 0.07803  | -1.051838 | 0.292874 | 0.386574 |

|       |           |             |              |          |           |          |          |
|-------|-----------|-------------|--------------|----------|-----------|----------|----------|
| 16729 | RHOT2     | 1288.732671 | -0.082133165 | 0.160212 | -0.512654 | 0.608194 | 0.712607 |
| 16722 | TMTC4     | 472.7205955 | -0.082212249 | 0.159875 | -0.514229 | 0.607092 | 0.711649 |
| 17186 | TRPV1     | 148.6294547 | -0.082221535 | 0.210691 | -0.390247 | 0.696354 | 0.794236 |
| 16047 | SPAST     | 449.1870302 | -0.08253769  | 0.11825  | -0.697992 | 0.485183 | 0.592638 |
| 17831 | MME       | 4115.468165 | -0.082632411 | 0.344919 | -0.239571 | 0.810663 | 0.891134 |
| 15836 | CASP9     | 307.6042901 | -0.082876935 | 0.108536 | -0.763592 | 0.445111 | 0.550936 |
| 16154 | ALS2CR4   | 423.52275   | -0.08288104  | 0.124611 | -0.665119 | 0.505974 | 0.613941 |
| 15798 | DNAJC5    | 1938.290268 | -0.082954162 | 0.106909 | -0.775933 | 0.437789 | 0.543142 |
| 16783 | NFATC1    | 413.4799827 | -0.083012141 | 0.167996 | -0.494132 | 0.621213 | 0.72552  |
| 15912 | FURIN     | 2614.182587 | -0.083015402 | 0.112437 | -0.738325 | 0.460317 | 0.567036 |
| 15851 | HSP90AB1  | 22437.37963 | -0.08335861  | 0.109945 | -0.758183 | 0.448341 | 0.554409 |
| 15434 | LIG3      | 374.5743476 | -0.083459795 | 0.095026 | -0.878284 | 0.379789 | 0.482352 |
| 16927 | CCDC106   | 403.6788498 | -0.083546038 | 0.182798 | -0.45704  | 0.647642 | 0.749952 |
| 15709 | ZNF202    | 238.5640061 | -0.083589478 | 0.104348 | -0.801065 | 0.423094 | 0.527918 |
| 17275 | ITGA4     | 947.1748362 | -0.083615828 | 0.223984 | -0.373312 | 0.708916 | 0.804377 |
| 17046 | AHR       | 2390.334838 | -0.083960537 | 0.196053 | -0.428255 | 0.668465 | 0.76864  |
| 15898 | MYCBP     | 439.0886042 | -0.084046136 | 0.113096 | -0.743142 | 0.457396 | 0.563933 |
| 16316 | SEC61A2   | 100.0704693 | -0.084322956 | 0.135084 | -0.624227 | 0.532479 | 0.639686 |
| 17290 | SV2A      | 105.4567005 | -0.084475695 | 0.228161 | -0.370247 | 0.711199 | 0.806258 |
| 15030 | M6PR      | 3575.223891 | -0.084534786 | 0.084828 | -0.996538 | 0.318989 | 0.416001 |
| 15119 | WDR82     | 2117.749707 | -0.084803885 | 0.087654 | -0.967481 | 0.333304 | 0.432111 |
| 17445 | ARL17B    | 2.331754713 | -0.084877503 | 0.259118 | -0.327563 | 0.743242 | 0.835098 |
| 16284 | SGSM3     | 888.3528368 | -0.084881548 | 0.134217 | -0.632421 | 0.527112 | 0.634483 |
| 14349 | C20orf43  | 2349.641777 | -0.085015336 | 0.070094 | -1.212873 | 0.225178 | 0.307562 |
| 16633 | TCF7L1    | 321.9929594 | -0.085141097 | 0.157508 | -0.540552 | 0.588817 | 0.693885 |
| 17752 | CRNA0010  | 108.9708682 | -0.085252065 | 0.33291  | -0.256081 | 0.797888 | 0.880994 |
| 17518 | NR1H4     | 1032.658797 | -0.085350178 | 0.273887 | -0.311626 | 0.755325 | 0.845138 |
| 18606 | SPHKAP    | 0.799648334 | -0.085389758 | 0.871419 | -0.097989 | 0.921941 | 0.972284 |
| 15396 | ZNF696    | 172.4940461 | -0.08581811  | 0.096268 | -0.891449 | 0.372688 | 0.474478 |
| 16661 | IGFBP7    | 23184.32847 | -0.085900941 | 0.161822 | -0.530836 | 0.595532 | 0.70062  |
| 15268 | SENP1     | 425.8538616 | -0.085913157 | 0.092467 | -0.929127 | 0.352823 | 0.452976 |
| 16076 | C20orf111 | 862.4216748 | -0.085963081 | 0.124476 | -0.6906   | 0.489817 | 0.59722  |
| 14978 | USP4      | 1093.754578 | -0.086062955 | 0.085063 | -1.011753 | 0.311656 | 0.40785  |
| 18216 | MAP3K15   | 18.85513184 | -0.086106179 | 0.542079 | -0.158844 | 0.873792 | 0.940228 |
| 16162 | DTX3L     | 2147.967676 | -0.086117497 | 0.129757 | -0.663684 | 0.506892 | 0.61475  |
| 14791 | EP400     | 1157.60962  | -0.086178303 | 0.080476 | -1.070856 | 0.284234 | 0.376686 |
| 17395 | LRRC4B    | 54.30123528 | -0.08636942  | 0.251883 | -0.342895 | 0.731677 | 0.824469 |
| 15650 | NDEL1     | 751.084516  | -0.08639502  | 0.104989 | -0.822896 | 0.410567 | 0.514219 |
| 16039 | FUNDC2    | 2422.66497  | -0.086497403 | 0.123744 | -0.699    | 0.484552 | 0.592163 |
| 15756 | RABL2A    | 280.0660916 | -0.086617485 | 0.109948 | -0.787801 | 0.430813 | 0.535946 |
| 15399 | DCUN1D5   | 297.8150759 | -0.086726602 | 0.097385 | -0.890552 | 0.37317  | 0.474998 |
| 15332 | CD99L2    | 2199.278623 | -0.086889067 | 0.095445 | -0.910359 | 0.362633 | 0.463624 |
| 16689 | KIAA1908  | 124.0188591 | -0.087158174 | 0.167326 | -0.52089  | 0.602444 | 0.70759  |
| 16302 | GNPDA1    | 1727.291557 | -0.087244529 | 0.139266 | -0.62646  | 0.531013 | 0.638473 |
| 17104 | CELF2     | 801.4452914 | -0.087279957 | 0.211993 | -0.411712 | 0.68055  | 0.779893 |
| 16624 | BTN3A1    | 1513.974217 | -0.087284692 | 0.160911 | -0.542441 | 0.587515 | 0.692726 |
| 16513 | ERI1      | 312.851266  | -0.087577074 | 0.154122 | -0.568232 | 0.569877 | 0.676447 |

|       |          |             |              |          |           |          |          |
|-------|----------|-------------|--------------|----------|-----------|----------|----------|
| 16196 | RRN3P3   | 72.92085471 | -0.087697737 | 0.133807 | -0.655406 | 0.512207 | 0.619964 |
| 13893 | SART3    | 1160.638428 | -0.087709015 | 0.064941 | -1.350589 | 0.176827 | 0.249477 |
| 17869 | CL14-CCL | 103.6720044 | -0.087916516 | 0.376236 | -0.233674 | 0.815238 | 0.894257 |
| 15890 | DNASE1L1 | 771.8104057 | -0.087978984 | 0.117962 | -0.745823 | 0.455774 | 0.562217 |
| 15599 | HEATR3   | 254.6571672 | -0.087979155 | 0.105245 | -0.835949 | 0.403184 | 0.506622 |
| 15145 | LLPH     | 503.0893038 | -0.088382283 | 0.091936 | -0.961351 | 0.336376 | 0.435345 |
| 15202 | SIRT3    | 781.7885227 | -0.088640617 | 0.093627 | -0.946746 | 0.343768 | 0.443244 |
| 15439 | ELAC2    | 1322.797669 | -0.088792739 | 0.101339 | -0.876192 | 0.380926 | 0.483615 |
| 17177 | SSPN     | 1226.558324 | -0.088829252 | 0.226285 | -0.392555 | 0.694648 | 0.792676 |
| 16205 | GPI      | 12859.89474 | -0.088889295 | 0.136003 | -0.653585 | 0.513379 | 0.620965 |
| 16733 | C15orf62 | 32.69135734 | -0.088918941 | 0.174267 | -0.510246 | 0.609879 | 0.714411 |
| 16889 | MEIS2    | 258.1093949 | -0.088925549 | 0.190137 | -0.467693 | 0.640004 | 0.742775 |
| 14480 | CRKL     | 1948.549719 | -0.088928695 | 0.075729 | -1.174295 | 0.240277 | 0.325253 |
| 14980 | AGPAT1   | 2152.682702 | -0.08896072  | 0.087959 | -1.01139  | 0.31183  | 0.408023 |
| 16253 | SMS      | 2432.762674 | -0.088992319 | 0.139122 | -0.639673 | 0.522385 | 0.629993 |
| 16376 | PRNP     | 2982.471128 | -0.089208475 | 0.147004 | -0.606842 | 0.543956 | 0.65108  |
| 15947 | CCDC120  | 181.488338  | -0.08952334  | 0.123216 | -0.726555 | 0.467499 | 0.574494 |
| 14591 | TOR1B    | 601.7869278 | -0.089542869 | 0.078632 | -1.138755 | 0.254806 | 0.342296 |
| 16740 | RBL1     | 124.7352258 | -0.089641478 | 0.176027 | -0.50925  | 0.610577 | 0.714911 |
| 17051 | BCL6B    | 834.5559818 | -0.089668034 | 0.20989  | -0.427214 | 0.669224 | 0.769307 |
| 17526 | CDH2     | 2065.778865 | -0.089673835 | 0.290106 | -0.309107 | 0.75724  | 0.846894 |
| 18263 | FRG2C    | 1.776556423 | -0.089679806 | 0.598584 | -0.14982  | 0.880907 | 0.945545 |
| 15448 | POLR3GL  | 576.6173973 | -0.089792282 | 0.102672 | -0.874554 | 0.381816 | 0.484446 |
| 17328 | UTS2D    | 4.12685562  | -0.089855171 | 0.249291 | -0.360442 | 0.718516 | 0.812768 |
| 16442 | MIDN     | 2260.193391 | -0.089861305 | 0.152373 | -0.589745 | 0.555361 | 0.662063 |
| 16853 | SLC25A39 | 2761.674913 | -0.090065019 | 0.188549 | -0.477675 | 0.632882 | 0.736078 |
| 14781 | ZC3H10   | 181.8246361 | -0.090122143 | 0.083896 | -1.074215 | 0.282726 | 0.374922 |
| 15342 | LYPLA2P1 | 55.67653595 | -0.090137855 | 0.099334 | -0.907426 | 0.364182 | 0.46528  |
| 14056 | EI24     | 2147.254558 | -0.090142042 | 0.069335 | -1.300095 | 0.193568 | 0.26993  |
| 15379 | HEATR1   | 914.8134182 | -0.090297039 | 0.100928 | -0.894664 | 0.370967 | 0.472808 |
| 15534 | AAMP     | 2110.217224 | -0.090402037 | 0.106273 | -0.850658 | 0.394959 | 0.498365 |
| 14964 | ZNF786   | 116.2503843 | -0.090476878 | 0.088884 | -1.017922 | 0.308715 | 0.404379 |
| 16922 | CLIC2    | 453.980885  | -0.090567708 | 0.197196 | -0.459277 | 0.646035 | 0.748268 |
| 16781 | CLCN7    | 2239.783674 | -0.090573898 | 0.182617 | -0.495978 | 0.61991  | 0.724041 |
| 16351 | DPYSL2   | 4222.705643 | -0.090620684 | 0.147657 | -0.613726 | 0.539396 | 0.646609 |
| 15568 | FCHSD2   | 951.3179134 | -0.090655204 | 0.107576 | -0.842708 | 0.399392 | 0.502857 |
| 14464 | SDCCAG8  | 462.7245526 | -0.090704136 | 0.076955 | -1.17866  | 0.238534 | 0.323251 |
| 18289 | FAM55D   | 1.761616507 | -0.090739872 | 0.621968 | -0.145892 | 0.884007 | 0.947423 |
| 16780 | CDK10    | 1259.149722 | -0.090974797 | 0.183372 | -0.496122 | 0.619808 | 0.724009 |
| 16135 | CC2D1A   | 640.6031435 | -0.090975021 | 0.13551  | -0.671351 | 0.501997 | 0.609832 |
| 15598 | PEX10    | 544.307708  | -0.09100445  | 0.108837 | -0.836153 | 0.403069 | 0.506511 |
| 17778 | TMEM45B  | 34.43251236 | -0.09119194  | 0.36463  | -0.250094 | 0.802515 | 0.884806 |
| 17355 | CC2D2B   | 9.229996914 | -0.091215821 | 0.259576 | -0.351403 | 0.725286 | 0.819102 |
| 16465 | SLC25A43 | 678.5991177 | -0.091386701 | 0.156858 | -0.582609 | 0.560156 | 0.666846 |
| 17127 | EXOC3L   | 279.8514623 | -0.091540556 | 0.226455 | -0.404233 | 0.686041 | 0.78514  |
| 16190 | DBI      | 2398.963444 | -0.091682527 | 0.139756 | -0.65602  | 0.511811 | 0.619642 |
| 15292 | RPP30    | 399.2728573 | -0.091797641 | 0.099472 | -0.92285  | 0.356086 | 0.456424 |

|       |           |             |              |          |           |          |          |
|-------|-----------|-------------|--------------|----------|-----------|----------|----------|
| 15309 | NUP188    | 894.6005087 | -0.091800665 | 0.099894 | -0.918985 | 0.358104 | 0.458471 |
| 15472 | PAAF1     | 525.6172558 | -0.091825817 | 0.105668 | -0.869004 | 0.384845 | 0.487548 |
| 17011 | SPDYE7P   | 8.292225032 | -0.091837886 | 0.210052 | -0.437215 | 0.661955 | 0.762703 |
| 15044 | NOP58     | 896.5089762 | -0.091891911 | 0.092478 | -0.993662 | 0.320388 | 0.417457 |
| 15411 | KLC1      | 1022.614461 | -0.091904887 | 0.103705 | -0.886213 | 0.375503 | 0.477596 |
| 16067 | EIF3K     | 3335.563688 | -0.091957669 | 0.132644 | -0.693268 | 0.488141 | 0.59551  |
| 15381 | DIS3L2    | 420.6029397 | -0.092250669 | 0.103167 | -0.89419  | 0.37122  | 0.473039 |
| 16394 | HDAC4     | 341.0650026 | -0.092360381 | 0.153325 | -0.602385 | 0.546918 | 0.653906 |
| 14540 | PELO      | 933.1564594 | -0.09243833  | 0.080145 | -1.153384 | 0.248753 | 0.335337 |
| 15946 | C19orf47  | 215.9813741 | -0.092456353 | 0.127151 | -0.727136 | 0.467143 | 0.574217 |
| 16923 | PECAM1    | 4026.114348 | -0.092639828 | 0.201705 | -0.459283 | 0.646031 | 0.748268 |
| 13941 | RNF114    | 1897.654292 | -0.092764    | 0.069343 | -1.337757 | 0.180976 | 0.254451 |
| 16640 | OCIAD2    | 2332.142452 | -0.09276869  | 0.172456 | -0.537927 | 0.590628 | 0.695727 |
| 16762 | WSB1      | 2876.635528 | -0.092816006 | 0.185528 | -0.50028  | 0.616878 | 0.721359 |
| 17618 | ACY3      | 538.5044738 | -0.092923762 | 0.320851 | -0.289616 | 0.77211  | 0.858972 |
| 16809 | CHST10    | 265.5285054 | -0.0929591   | 0.190275 | -0.488552 | 0.625159 | 0.728999 |
| 17360 | ZNF486    | 118.1335958 | -0.093212948 | 0.266102 | -0.350291 | 0.72612  | 0.819855 |
| 15990 | RNF217    | 87.26099595 | -0.093259866 | 0.130438 | -0.714975 | 0.474624 | 0.581808 |
| 16717 | PLEKHM1   | 150.0931225 | -0.09344519  | 0.181326 | -0.515345 | 0.606312 | 0.71087  |
| 15683 | CREB3L2   | 2974.921466 | -0.093503796 | 0.11514  | -0.812091 | 0.416739 | 0.520851 |
| 15675 | MAPKAPK   | 3925.272095 | -0.093519152 | 0.114861 | -0.814197 | 0.415532 | 0.519607 |
| 15776 | C7orf70   | 449.4058158 | -0.093560598 | 0.119487 | -0.783021 | 0.433615 | 0.538748 |
| 16848 | HSBP1L1   | 175.5197208 | -0.093567959 | 0.195444 | -0.478745 | 0.63212  | 0.73541  |
| 16265 | LOC145783 | 47.94785607 | -0.0937554   | 0.147368 | -0.6362   | 0.524646 | 0.632239 |
| 17944 | MGC16025  | 0.722161209 | -0.093811209 | 0.427985 | -0.219193 | 0.8265   | 0.902771 |
| 15315 | TTC27     | 442.4894517 | -0.09384998  | 0.102271 | -0.917664 | 0.358795 | 0.459206 |
| 17303 | ASS1      | 2828.564894 | -0.093897482 | 0.256297 | -0.366362 | 0.714095 | 0.808933 |
| 15800 | TMEM60    | 404.4203116 | -0.093925683 | 0.12106  | -0.77586  | 0.437832 | 0.543161 |
| 15883 | MTA1      | 622.780418  | -0.09394466  | 0.125598 | -0.74798  | 0.454472 | 0.560858 |
| 14979 | POP4      | 674.3338052 | -0.094007178 | 0.09292  | -1.011705 | 0.311679 | 0.407852 |
| 16157 | NSUN6     | 174.4755709 | -0.094068043 | 0.141616 | -0.664246 | 0.506533 | 0.61448  |
| 16985 | GADD45B   | 2309.226665 | -0.094108328 | 0.212499 | -0.442866 | 0.657863 | 0.759186 |
| 18097 | POF1B     | 117.705311  | -0.094133315 | 0.511022 | -0.184206 | 0.853852 | 0.924813 |
| 15041 | GRWD1     | 659.857879  | -0.094322835 | 0.094874 | -0.994189 | 0.320131 | 0.417185 |
| 14280 | EXOSC10   | 1002.947651 | -0.094353853 | 0.076423 | -1.234629 | 0.216969 | 0.297804 |
| 16400 | HIP1      | 1262.910467 | -0.094389955 | 0.157153 | -0.600625 | 0.54809  | 0.65499  |
| 15933 | LRRC14    | 564.8267632 | -0.094408911 | 0.128969 | -0.732027 | 0.464152 | 0.571007 |
| 17399 | LOC143666 | 117.8131296 | -0.09443605  | 0.276258 | -0.34184  | 0.732471 | 0.825172 |
| 16094 | IFT140    | 648.6105853 | -0.094652074 | 0.138577 | -0.68303  | 0.494588 | 0.602362 |
| 17622 | CLSTN2    | 45.7549746  | -0.09470171  | 0.328648 | -0.288156 | 0.773228 | 0.86006  |
| 16587 | GUSBL1    | 24.06838461 | -0.094724224 | 0.17192  | -0.550978 | 0.581649 | 0.687332 |
| 15260 | MRPS23    | 781.8819906 | -0.094778551 | 0.101847 | -0.930596 | 0.352063 | 0.452208 |
| 14655 | ZMYM3     | 801.7068409 | -0.094782908 | 0.084974 | -1.115437 | 0.264663 | 0.353986 |
| 17763 | HOXB9     | 206.795065  | -0.094983322 | 0.37426  | -0.253789 | 0.799658 | 0.882402 |
| 15719 | C14orf143 | 51.54552546 | -0.095181834 | 0.119277 | -0.797987 | 0.424878 | 0.529749 |
| 17363 | PCDHGA1   | 24.83243087 | -0.095194317 | 0.272168 | -0.349763 | 0.726517 | 0.820161 |
| 17122 | ADPRHL1   | 13.23105122 | -0.095270289 | 0.23506  | -0.405302 | 0.685255 | 0.78447  |

|       |           |             |              |          |           |          |          |
|-------|-----------|-------------|--------------|----------|-----------|----------|----------|
| 16598 | LYSMD4    | 222.5939072 | -0.095292487 | 0.173794 | -0.548306 | 0.583482 | 0.688909 |
| 17946 | SLC35F3   | 61.41132414 | -0.095606627 | 0.4371   | -0.218729 | 0.826861 | 0.903115 |
| 14216 | ZNHIT3    | 547.7694159 | -0.095664852 | 0.076414 | -1.251921 | 0.210599 | 0.290373 |
| 17691 | TNS4      | 13.41192458 | -0.0957094   | 0.355668 | -0.269098 | 0.787855 | 0.872915 |
| 15632 | NUP37     | 291.9627095 | -0.095947767 | 0.116097 | -0.826443 | 0.408553 | 0.512285 |
| 14360 | MORF4L2   | 4132.092344 | -0.096165527 | 0.079436 | -1.210602 | 0.226048 | 0.308549 |
| 15417 | GEMIN8    | 465.6652187 | -0.096296456 | 0.108893 | -0.88432  | 0.376524 | 0.478708 |
| 17783 | CHRNA3    | 1.893548492 | -0.096303349 | 0.387557 | -0.248488 | 0.803757 | 0.885849 |
| 15173 | KTELC1    | 483.3998992 | -0.096374569 | 0.100854 | -0.955581 | 0.339284 | 0.438299 |
| 17283 | LRRN3     | 18.75041206 | -0.096689407 | 0.260042 | -0.371823 | 0.710025 | 0.805253 |
| 16595 | OSBPL11   | 790.7791654 | -0.096799978 | 0.176395 | -0.54877  | 0.583164 | 0.688797 |
| 15835 | POLR2E    | 2565.481276 | -0.096915261 | 0.126814 | -0.764229 | 0.444731 | 0.5505   |
| 16024 | BAZ1A     | 848.1091555 | -0.097001174 | 0.137894 | -0.703449 | 0.481776 | 0.589313 |
| 17834 | LOC440896 | 1.207656981 | -0.097146407 | 0.407885 | -0.238171 | 0.811749 | 0.892124 |
| 13296 | SUPT4H1   | 1352.916568 | -0.097149686 | 0.062912 | -1.544224 | 0.122534 | 0.18064  |
| 15177 | INTS8     | 627.0336856 | -0.09756933  | 0.102248 | -0.954244 | 0.33996  | 0.439056 |
| 15553 | APAF1     | 557.9603653 | -0.097613319 | 0.115413 | -0.845774 | 0.397679 | 0.501183 |
| 15241 | PCNT      | 506.7462323 | -0.097619743 | 0.104354 | -0.93547  | 0.349546 | 0.449541 |
| 16164 | CXXC1     | 774.3796736 | -0.09770607  | 0.147291 | -0.663353 | 0.507105 | 0.614932 |
| 15588 | MRPL22    | 581.4027789 | -0.097745602 | 0.116577 | -0.838464 | 0.40177  | 0.505202 |
| 15327 | C10orf2   | 233.7327964 | -0.097779732 | 0.107239 | -0.91179  | 0.361879 | 0.462791 |
| 15885 | SPG7      | 1567.003108 | -0.097798698 | 0.130824 | -0.747559 | 0.454726 | 0.561121 |
| 15945 | RAB20     | 723.720155  | -0.097834014 | 0.134515 | -0.72731  | 0.467036 | 0.574122 |
| 15541 | FAM86C    | 130.743537  | -0.097880962 | 0.11536  | -0.848485 | 0.396168 | 0.499633 |
| 14024 | PHF12     | 821.9793652 | -0.098065107 | 0.074739 | -1.312098 | 0.189487 | 0.264841 |
| 14385 | DUSP22    | 760.8154242 | -0.09819215  | 0.081682 | -1.202131 | 0.229313 | 0.312461 |
| 15531 | FIGNL1    | 201.4648172 | -0.098499612 | 0.115745 | -0.851004 | 0.394767 | 0.498218 |
| 16958 | LENG8     | 3134.145301 | -0.098538912 | 0.219154 | -0.449634 | 0.652975 | 0.754655 |
| 15412 | XRRA1     | 443.7198954 | -0.098646822 | 0.111393 | -0.885576 | 0.375846 | 0.478001 |
| 15778 | PARP1     | 2506.880105 | -0.098886171 | 0.126378 | -0.782466 | 0.433941 | 0.539084 |
| 15304 | CYTH2     | 1308.192526 | -0.099078247 | 0.107709 | -0.919867 | 0.357642 | 0.458059 |
| 16106 | PPARD     | 1111.086583 | -0.099291833 | 0.14607  | -0.679755 | 0.49666  | 0.604435 |
| 15090 | MRPL43    | 1105.074796 | -0.099624896 | 0.101762 | -0.978998 | 0.327581 | 0.425508 |
| 15928 | VAC14     | 1231.510652 | -0.099737266 | 0.135732 | -0.73481  | 0.462455 | 0.569104 |
| 15745 | POLG      | 1403.141697 | -0.099777639 | 0.126103 | -0.791242 | 0.428803 | 0.533854 |
| 14266 | VPS33B    | 275.0491178 | -0.099778201 | 0.080538 | -1.238903 | 0.215381 | 0.295927 |
| 16161 | ZNF436    | 567.5189665 | -0.100007689 | 0.150637 | -0.6639   | 0.506754 | 0.614621 |
| 15019 | MEF2D     | 1790.695406 | -0.100093796 | 0.099858 | -1.002363 | 0.316168 | 0.412625 |
| 15011 | PARVA     | 1874.47901  | -0.100146878 | 0.099623 | -1.005255 | 0.314774 | 0.410997 |
| 15854 | CDC42EP4  | 1130.760472 | -0.100247099 | 0.132518 | -0.756482 | 0.44936  | 0.555565 |
| 16791 | MOCS1     | 1029.04045  | -0.100485962 | 0.204463 | -0.491462 | 0.6231   | 0.727339 |
| 16233 | ZNF589    | 198.0587404 | -0.100713059 | 0.156068 | -0.645314 | 0.518724 | 0.626348 |
| 15089 | DRG1      | 1134.29127  | -0.100729464 | 0.102866 | -0.979228 | 0.327468 | 0.425389 |
| 15001 | PRUNE     | 850.1218753 | -0.100736389 | 0.100033 | -1.007029 | 0.313921 | 0.410184 |
| 15900 | ME2       | 913.8048062 | -0.100773721 | 0.135832 | -0.741899 | 0.458149 | 0.564719 |
| 17715 | TUBB2B    | 89.37930556 | -0.100891485 | 0.382362 | -0.263864 | 0.791885 | 0.876269 |
| 16725 | KRT222    | 55.77941622 | -0.100968232 | 0.196544 | -0.513719 | 0.607448 | 0.711904 |

|       |           |             |              |          |           |          |          |
|-------|-----------|-------------|--------------|----------|-----------|----------|----------|
| 15454 | LOC728758 | 40.21710879 | -0.101197945 | 0.115817 | -0.873777 | 0.38224  | 0.484781 |
| 16932 | HSD17B14  | 811.7477907 | -0.101513924 | 0.223117 | -0.45498  | 0.649124 | 0.75142  |
| 14861 | NDST2     | 501.8826958 | -0.101655966 | 0.096842 | -1.049708 | 0.293852 | 0.387578 |
| 15596 | TSC2      | 1400.435821 | -0.101930692 | 0.121849 | -0.83653  | 0.402857 | 0.506323 |
| 15660 | SKI       | 1884.585867 | -0.101991298 | 0.12452  | -0.819073 | 0.412745 | 0.516616 |
| 15687 | MITD1     | 249.5034629 | -0.102007289 | 0.125806 | -0.810832 | 0.417462 | 0.521621 |
| 16229 | NOTCH1    | 1450.358532 | -0.102076695 | 0.15786  | -0.646628 | 0.517873 | 0.625474 |
| 15718 | PLEKHA8   | 101.732504  | -0.102539205 | 0.128358 | -0.798855 | 0.424374 | 0.529212 |
| 16041 | ZDHHC1    | 238.5939287 | -0.10255475  | 0.146762 | -0.698783 | 0.484688 | 0.592255 |
| 17535 | OIT3      | 48.61227622 | -0.10256672  | 0.334042 | -0.307048 | 0.758807 | 0.848211 |
| 15808 | TTC1      | 1500.936163 | -0.102675874 | 0.132691 | -0.773798 | 0.43905  | 0.544397 |
| 14397 | PIGC      | 632.6166106 | -0.102743349 | 0.085753 | -1.198137 | 0.230864 | 0.314313 |
| 16143 | MCM8      | 152.0901979 | -0.102866057 | 0.154066 | -0.667674 | 0.504342 | 0.612377 |
| 17312 | ADAM20    | 1.829621621 | -0.102942392 | 0.282777 | -0.364041 | 0.715828 | 0.810428 |
| 15466 | VRK2      | 401.4276629 | -0.102979535 | 0.118237 | -0.87096  | 0.383776 | 0.486382 |
| 15086 | EIF3M     | 2625.279423 | -0.103014    | 0.105087 | -0.98027  | 0.326953 | 0.424805 |
| 16836 | CD200     | 745.1408638 | -0.103059738 | 0.214381 | -0.480732 | 0.630707 | 0.734245 |
| 15587 | ARMC6     | 556.0205337 | -0.103106272 | 0.122934 | -0.838716 | 0.401629 | 0.505057 |
| 15584 | FAM131A   | 300.4189472 | -0.103208375 | 0.122957 | -0.839384 | 0.401254 | 0.504683 |
| 15431 | FIZ1      | 362.594145  | -0.10325113  | 0.117348 | -0.879874 | 0.378928 | 0.481327 |
| 18182 | FAM71A    | 0.432540577 | -0.103585814 | 0.620296 | -0.166994 | 0.867375 | 0.935068 |
| 14825 | BFAR      | 1808.861899 | -0.103786794 | 0.098141 | -1.057532 | 0.290269 | 0.383754 |
| 15848 | EEF1A1    | 107240.8691 | -0.103822223 | 0.136704 | -0.759467 | 0.447573 | 0.553564 |
| 16217 | SLC36A1   | 604.305664  | -0.103869363 | 0.159787 | -0.650048 | 0.515661 | 0.623264 |
| 16778 | TTC23L    | 10.25834763 | -0.104061838 | 0.209485 | -0.49675  | 0.619365 | 0.723577 |
| 16760 | AQP11     | 47.41151905 | -0.104077147 | 0.207881 | -0.500656 | 0.616613 | 0.721136 |
| 14689 | SLC35A4   | 2569.102246 | -0.104083947 | 0.094249 | -1.104345 | 0.269443 | 0.359545 |
| 16966 | HIST1H2BF | 765.6602133 | -0.104115313 | 0.232448 | -0.447909 | 0.654219 | 0.755826 |
| 16514 | ZNF281    | 349.4733213 | -0.104310434 | 0.183599 | -0.568143 | 0.569938 | 0.676478 |
| 15811 | MLEC      | 12323.85711 | -0.104330242 | 0.13494  | -0.773163 | 0.439426 | 0.544759 |
| 15443 | ACTN4     | 11573.09321 | -0.10463407  | 0.119587 | -0.874962 | 0.381594 | 0.484288 |
| 17001 | LOC400043 | 188.4940237 | -0.104675565 | 0.23838  | -0.439111 | 0.660581 | 0.761605 |
| 16195 | RNF144B   | 1109.770635 | -0.105394084 | 0.160821 | -0.655349 | 0.512243 | 0.619964 |
| 15372 | ZBTB25    | 116.6941809 | -0.105498434 | 0.117394 | -0.898669 | 0.368829 | 0.470297 |
| 14567 | INTS10    | 908.9553927 | -0.10554431  | 0.092103 | -1.145932 | 0.251823 | 0.338824 |
| 13718 | UTP6      | 676.9770357 | -0.105651227 | 0.074814 | -1.412186 | 0.157895 | 0.225609 |
| 17257 | IRX3      | 1090.65055  | -0.105890056 | 0.281929 | -0.375591 | 0.707221 | 0.803252 |
| 16078 | COX17     | 636.487872  | -0.105914286 | 0.153468 | -0.690138 | 0.490108 | 0.5975   |
| 16286 | SLC38A6   | 269.2166883 | -0.105937493 | 0.16769  | -0.631745 | 0.527554 | 0.634937 |
| 16168 | LRP12     | 414.1865344 | -0.105973693 | 0.159911 | -0.662705 | 0.50752  | 0.615283 |
| 14822 | CCT6A     | 3694.505172 | -0.106027012 | 0.100213 | -1.058018 | 0.290047 | 0.38354  |
| 15644 | CCDC46    | 270.6891147 | -0.106078092 | 0.128772 | -0.823764 | 0.410074 | 0.513753 |
| 14844 | ZMAT2     | 2045.860848 | -0.106392411 | 0.100996 | -1.053429 | 0.292144 | 0.385767 |
| 16042 | CCDC159   | 229.438923  | -0.10643426  | 0.15234  | -0.698661 | 0.484764 | 0.592274 |
| 15613 | TUBG2     | 361.7055048 | -0.10661157  | 0.128095 | -0.832287 | 0.405247 | 0.508786 |
| 16037 | H3F3A     | 3024.637967 | -0.106909233 | 0.152686 | -0.700188 | 0.48381  | 0.59133  |
| 17422 | MAP1LC3C  | 12.90413382 | -0.107242954 | 0.319258 | -0.335913 | 0.736937 | 0.829106 |



|       |           |             |              |          |           |          |          |
|-------|-----------|-------------|--------------|----------|-----------|----------|----------|
| 14758 | TOE1      | 203.1394696 | -0.107272853 | 0.099148 | -1.081951 | 0.279274 | 0.370932 |
| 18293 | KRT73     | 0.511109186 | -0.107343458 | 0.740346 | -0.144991 | 0.884718 | 0.947978 |
| 17707 | TUBA4B    | 44.27536421 | -0.107370918 | 0.404373 | -0.265524 | 0.790606 | 0.875174 |
| 15562 | TMEM165   | 1474.351207 | -0.107430332 | 0.127229 | -0.844385 | 0.398455 | 0.50187  |
| 14121 | NAT10     | 1139.703662 | -0.107459158 | 0.083873 | -1.281206 | 0.200121 | 0.277783 |
| 17126 | C2orf50   | 5.506652902 | -0.107637464 | 0.266264 | -0.404251 | 0.686028 | 0.78514  |
| 15157 | C7orf28A  | 943.6044379 | -0.107739758 | 0.112428 | -0.958297 | 0.337913 | 0.436989 |
| 17807 | GLP1R     | 7.772988823 | -0.107871575 | 0.440279 | -0.245008 | 0.806451 | 0.887698 |
| 14642 | ZNF490    | 222.2386321 | -0.108021957 | 0.096479 | -1.119642 | 0.262866 | 0.351895 |
| 16571 | KIAA1383  | 100.6380588 | -0.108354103 | 0.195548 | -0.554104 | 0.579507 | 0.68547  |
| 17981 | C3orf48   | 0.36298423  | -0.108367851 | 0.520892 | -0.208043 | 0.835195 | 0.910442 |
| 18137 | ZNF560    | 0.305526459 | -0.10836794  | 0.611231 | -0.177295 | 0.859277 | 0.928637 |
| 18220 | TMEM212   | 0.230457341 | -0.108368057 | 0.685768 | -0.158024 | 0.874438 | 0.940716 |
| 18305 | PDE6C     | 0.230163359 | -0.108368137 | 0.759213 | -0.142737 | 0.886498 | 0.949305 |
| 18396 | VHLL      | 0.202851033 | -0.108368254 | 0.838891 | -0.12918  | 0.897215 | 0.955986 |
| 18507 | HCRTR1    | 0.167402907 | -0.108368527 | 0.989287 | -0.109542 | 0.912773 | 0.966677 |
| 18567 | C14orf23  | 0.238672047 | -0.108368562 | 1.086858 | -0.099708 | 0.920576 | 0.971781 |
| 18556 | OR52W1    | 0.143639024 | -0.108368679 | 1.058558 | -0.102374 | 0.91846  | 0.970766 |
| 18612 | OC1001339 | 0.168549629 | -0.108368784 | 1.132728 | -0.095671 | 0.923782 | 0.97287  |
| 18613 | FOXD3     | 0.161486914 | -0.108368787 | 1.133901 | -0.095572 | 0.923861 | 0.9729   |
| 18684 | LOC150185 | 0.183595799 | -0.108369114 | 1.316263 | -0.082331 | 0.934384 | 0.979957 |
| 18803 | CALML5    | 0.303227401 | -0.108369284 | 1.569196 | -0.06906  | 0.944942 | 0.985142 |
| 18762 | SLC25A31  | 0.106076785 | -0.108369659 | 1.450153 | -0.07473  | 0.94043  | 0.982432 |
| 18797 | GABRA1    | 0.166283036 | -0.108369738 | 1.552953 | -0.069783 | 0.944366 | 0.98476  |
| 18809 | T         | 0.110240372 | -0.108370021 | 1.578294 | -0.068663 | 0.945258 | 0.985142 |
| 18810 | TRHR      | 0.11018402  | -0.108370021 | 1.578378 | -0.068659 | 0.945261 | 0.985142 |
| 18808 | SEC14L3   | 0.108450728 | -0.108370029 | 1.581005 | -0.068545 | 0.945352 | 0.985142 |
| 18943 | SPDYE4    | 0.108588095 | -0.108370515 | 1.73809  | -0.06235  | 0.950284 | 0.986718 |
| 18831 | BMP10     | 0.089657081 | -0.108370698 | 1.766582 | -0.061345 | 0.951085 | 0.986718 |
| 18837 | CAV3      | 0.087270226 | -0.108370716 | 1.772042 | -0.061156 | 0.951235 | 0.986718 |
| 18900 | OR13D1    | 0.086821255 | -0.10837072  | 1.773089 | -0.06112  | 0.951264 | 0.986718 |
| 18891 | MCHR2     | 0.085970784 | -0.108370727 | 1.77509  | -0.061051 | 0.951319 | 0.986718 |
| 18835 | C18orf20  | 0.146378867 | -0.108370804 | 1.884517 | -0.057506 | 0.954142 | 0.986718 |
| 18966 | VGLL2     | 0.107937983 | -0.108371168 | 1.929276 | -0.056172 | 0.955205 | 0.987186 |
| 18971 | ASAP1IT1  | 0.091050308 | -0.108371382 | 1.957927 | -0.05535  | 0.95586  | 0.98755  |
| 18973 | GLRA1     | 0.088703043 | -0.108371406 | 1.964243 | -0.055172 | 0.956001 | 0.987593 |
| 18975 | OR10A2    | 0.087247075 | -0.108371421 | 1.968264 | -0.055059 | 0.956091 | 0.987633 |
| 18976 | OR2K2     | 0.085492666 | -0.10837144  | 1.973218 | -0.054921 | 0.956201 | 0.987637 |
| 18977 | PRR25     | 0.084799334 | -0.108371448 | 1.975209 | -0.054866 | 0.956245 | 0.987637 |
| 18993 | OR4K2     | 0.144143317 | -0.108371572 | 2.10465  | -0.051492 | 0.958934 | 0.989631 |
| 19104 | OR1E2     | 0.1075315   | -0.108372038 | 2.15783  | -0.050223 | 0.959945 | 0.989949 |
| 19026 | DCAF8L1   | 0.08598384  | -0.108372408 | 2.213899 | -0.048951 | 0.960958 | 0.989949 |
| 19017 | CCDC79    | 0.0843565   | -0.108372433 | 2.219624 | -0.048825 | 0.961059 | 0.989949 |
| 19145 | PLA2G2C   | 0.069365633 | -0.108372791 | 2.268381 | -0.047775 | 0.961895 | 0.989949 |
| 19166 | RPL3L     | 0.069196389 | -0.108372795 | 2.269152 | -0.047759 | 0.961908 | 0.989949 |
| 19057 | KCNQ1DN   | 0.069193254 | -0.108372795 | 2.269166 | -0.047759 | 0.961908 | 0.989949 |
| 18996 | ACCN5     | 0.0685796   | -0.108372807 | 2.27198  | -0.0477   | 0.961956 | 0.989949 |

|       |           |             |              |          |           |          |          |
|-------|-----------|-------------|--------------|----------|-----------|----------|----------|
| 19049 | HEATR7B2  | 0.068163422 | -0.108372816 | 2.273906 | -0.047659 | 0.961988 | 0.989949 |
| 19205 | TSGA13    | 0.06784367  | -0.108372823 | 2.275396 | -0.047628 | 0.962013 | 0.989949 |
| 19047 | GSTA5     | 0.067825499 | -0.108372823 | 2.275481 | -0.047626 | 0.962014 | 0.989949 |
| 19102 | OR11H12   | 0.06766628  | -0.108372827 | 2.276226 | -0.047611 | 0.962026 | 0.989949 |
| 19085 | MRGPRX4   | 0.067639278 | -0.108372827 | 2.276353 | -0.047608 | 0.962029 | 0.989949 |
| 19110 | OR2L2     | 0.067122172 | -0.108372838 | 2.27879  | -0.047557 | 0.962069 | 0.989949 |
| 19021 | CRISP2    | 0.127083009 | -0.108372885 | 2.396301 | -0.045225 | 0.963928 | 0.989949 |
| 19038 | FEZF1     | 0.067751222 | -0.108374356 | 2.593717 | -0.041783 | 0.966671 | 0.989949 |
| 19177 | SNORA22   | 0.067437643 | -0.108374366 | 2.59558  | -0.041753 | 0.966695 | 0.989949 |
| 19036 | FAM75A5   | 0.066958748 | -0.108374381 | 2.598445 | -0.041707 | 0.966732 | 0.989949 |
| 19189 | SPINK4    | 0.091963257 | -0.108375584 | 2.864837 | -0.03783  | 0.969824 | 0.989949 |
| 19210 | VSTM2B    | 0.088853464 | -0.108375658 | 2.878299 | -0.037653 | 0.969965 | 0.989949 |
| 19037 | FAM99A    | 0.064856078 | -0.108376102 | 2.91407  | -0.037191 | 0.970333 | 0.989949 |
| 19061 | KRTAP10-1 | 0.065998791 | -0.108376102 | 2.91407  | -0.037191 | 0.970333 | 0.989949 |
| 19071 | LOC402644 | 0.072067057 | -0.108376102 | 2.91407  | -0.037191 | 0.970333 | 0.989949 |
| 19078 | LOC84931  | 0.067954952 | -0.108376102 | 2.91407  | -0.037191 | 0.970333 | 0.989949 |
| 19094 | OPRM1     | 0.065890352 | -0.108376102 | 2.91407  | -0.037191 | 0.970333 | 0.989949 |
| 19198 | TGIF2LX   | 0.068260105 | -0.108376102 | 2.91407  | -0.037191 | 0.970333 | 0.989949 |
| 19065 | KRTAP3-2  | 0.049694023 | -0.108376347 | 2.91407  | -0.037191 | 0.970333 | 0.989949 |
| 19008 | C10orf96  | 0.047735988 | -0.108376347 | 2.91407  | -0.037191 | 0.970333 | 0.989949 |
| 19022 | CSN3      | 0.048993065 | -0.108376347 | 2.91407  | -0.037191 | 0.970333 | 0.989949 |
| 19121 | OR51V1    | 0.045551728 | -0.108376347 | 2.91407  | -0.037191 | 0.970333 | 0.989949 |
| 19169 | SCARNA21  | 0.047168718 | -0.108376347 | 2.91407  | -0.037191 | 0.970333 | 0.989949 |
| 18995 | ABCC12    | 0.047577074 | -0.108376347 | 2.91407  | -0.037191 | 0.970333 | 0.989949 |
| 19007 | C10orf113 | 0.049077725 | -0.108376347 | 2.91407  | -0.037191 | 0.970333 | 0.989949 |
| 19010 | C1orf141  | 0.046941009 | -0.108376347 | 2.91407  | -0.037191 | 0.970333 | 0.989949 |
| 19030 | DRGX      | 0.050501758 | -0.108376347 | 2.91407  | -0.037191 | 0.970333 | 0.989949 |
| 19040 | FSCB      | 0.04422701  | -0.108376347 | 2.91407  | -0.037191 | 0.970333 | 0.989949 |
| 19045 | GNG8      | 0.048911759 | -0.108376347 | 2.91407  | -0.037191 | 0.970333 | 0.989949 |
| 19046 | GPX6      | 0.045146212 | -0.108376347 | 2.91407  | -0.037191 | 0.970333 | 0.989949 |
| 19054 | IL4       | 0.047304972 | -0.108376347 | 2.91407  | -0.037191 | 0.970333 | 0.989949 |
| 19067 | LCE1B     | 0.048921913 | -0.108376347 | 2.91407  | -0.037191 | 0.970333 | 0.989949 |
| 19079 | LRIT1     | 0.045962222 | -0.108376347 | 2.91407  | -0.037191 | 0.970333 | 0.989949 |
| 19081 | MAGEB3    | 0.048269651 | -0.108376347 | 2.91407  | -0.037191 | 0.970333 | 0.989949 |
| 19083 | MGC34034  | 0.050734979 | -0.108376347 | 2.91407  | -0.037191 | 0.970333 | 0.989949 |
| 19087 | NKX6-2    | 0.049769233 | -0.108376347 | 2.91407  | -0.037191 | 0.970333 | 0.989949 |
| 19088 | NOBOX     | 0.049589369 | -0.108376347 | 2.91407  | -0.037191 | 0.970333 | 0.989949 |
| 19098 | OR10H2    | 0.048386132 | -0.108376347 | 2.91407  | -0.037191 | 0.970333 | 0.989949 |
| 19107 | OR2D3     | 0.047695614 | -0.108376347 | 2.91407  | -0.037191 | 0.970333 | 0.989949 |
| 19118 | OR4Q3     | 0.047137796 | -0.108376347 | 2.91407  | -0.037191 | 0.970333 | 0.989949 |
| 19122 | OR52B4    | 0.048585322 | -0.108376347 | 2.91407  | -0.037191 | 0.970333 | 0.989949 |
| 19126 | OR5V1     | 0.047197188 | -0.108376347 | 2.91407  | -0.037191 | 0.970333 | 0.989949 |
| 19130 | OR6M1     | 0.047902075 | -0.108376347 | 2.91407  | -0.037191 | 0.970333 | 0.989949 |
| 19143 | PDHA2     | 0.047073107 | -0.108376347 | 2.91407  | -0.037191 | 0.970333 | 0.989949 |
| 19149 | PRAMEF1   | 0.04711278  | -0.108376347 | 2.91407  | -0.037191 | 0.970333 | 0.989949 |
| 19153 | PRLHR     | 0.048529568 | -0.108376347 | 2.91407  | -0.037191 | 0.970333 | 0.989949 |
| 19154 | PRR23B    | 0.044657607 | -0.108376347 | 2.91407  | -0.037191 | 0.970333 | 0.989949 |

|       |           |             |              |         |           |          |          |
|-------|-----------|-------------|--------------|---------|-----------|----------|----------|
| 19158 | RAX2      | 0.048622193 | -0.108376347 | 2.91407 | -0.037191 | 0.970333 | 0.989949 |
| 19163 | RNASE9    | 0.047402462 | -0.108376347 | 2.91407 | -0.037191 | 0.970333 | 0.989949 |
| 19171 | SI        | 0.047302436 | -0.108376347 | 2.91407 | -0.037191 | 0.970333 | 0.989949 |
| 19183 | SNORA71A  | 0.048887296 | -0.108376347 | 2.91407 | -0.037191 | 0.970333 | 0.989949 |
| 19190 | SPP2      | 0.048357358 | -0.108376347 | 2.91407 | -0.037191 | 0.970333 | 0.989949 |
| 19196 | TAS2R40   | 0.048138078 | -0.108376347 | 2.91407 | -0.037191 | 0.970333 | 0.989949 |
| 19202 | TRIM49    | 0.04600387  | -0.108376347 | 2.91407 | -0.037191 | 0.970333 | 0.989949 |
| 19207 | TTY9B     | 0.048180684 | -0.108376347 | 2.91407 | -0.037191 | 0.970333 | 0.989949 |
| 19209 | VPREB1    | 0.047553987 | -0.108376347 | 2.91407 | -0.037191 | 0.970333 | 0.989949 |
| 18998 | ANXA8L1   | 0.029035212 | -0.108376592 | 2.91407 | -0.037191 | 0.970333 | 0.989949 |
| 19062 | KRTAP2-2  | 0.029344984 | -0.108376592 | 2.91407 | -0.037191 | 0.970333 | 0.989949 |
| 19080 | LYZL6     | 0.028847285 | -0.108376592 | 2.91407 | -0.037191 | 0.970333 | 0.989949 |
| 19091 | NPVF      | 0.027975843 | -0.108376592 | 2.91407 | -0.037191 | 0.970333 | 0.989949 |
| 19109 | OR2F2     | 0.027361135 | -0.108376592 | 2.91407 | -0.037191 | 0.970333 | 0.989949 |
| 19128 | OR6C2     | 0.027332622 | -0.108376592 | 2.91407 | -0.037191 | 0.970333 | 0.989949 |
| 19129 | OR6K6     | 0.026827102 | -0.108376592 | 2.91407 | -0.037191 | 0.970333 | 0.989949 |
| 19138 | OTOL1     | 0.028001879 | -0.108376592 | 2.91407 | -0.037191 | 0.970333 | 0.989949 |
| 19168 | SCARNA20  | 0.03136196  | -0.108376592 | 2.91407 | -0.037191 | 0.970333 | 0.989949 |
| 19201 | TNP1      | 0.029254779 | -0.108376592 | 2.91407 | -0.037191 | 0.970333 | 0.989949 |
| 19002 | BMP15     | 0.028614563 | -0.108376592 | 2.91407 | -0.037191 | 0.970333 | 0.989949 |
| 19006 | BSX       | 0.028089691 | -0.108376592 | 2.91407 | -0.037191 | 0.970333 | 0.989949 |
| 19009 | C16orf78  | 0.02932377  | -0.108376592 | 2.91407 | -0.037191 | 0.970333 | 0.989949 |
| 19011 | C1orf146  | 0.028904055 | -0.108376592 | 2.91407 | -0.037191 | 0.970333 | 0.989949 |
| 19019 | CLCA1     | 0.042962981 | -0.108376592 | 2.91407 | -0.037191 | 0.970333 | 0.989949 |
| 19020 | CRCT1     | 0.02865698  | -0.108376592 | 2.91407 | -0.037191 | 0.970333 | 0.989949 |
| 19023 | CSTT      | 0.027384438 | -0.108376592 | 2.91407 | -0.037191 | 0.970333 | 0.989949 |
| 19031 | DUSP21    | 0.02816384  | -0.108376592 | 2.91407 | -0.037191 | 0.970333 | 0.989949 |
| 19041 | FSHB      | 0.027035676 | -0.108376592 | 2.91407 | -0.037191 | 0.970333 | 0.989949 |
| 19042 | GFRAL     | 0.028173598 | -0.108376592 | 2.91407 | -0.037191 | 0.970333 | 0.989949 |
| 19043 | GK2       | 0.027814613 | -0.108376592 | 2.91407 | -0.037191 | 0.970333 | 0.989949 |
| 19048 | GSTTP2    | 0.02824956  | -0.108376592 | 2.91407 | -0.037191 | 0.970333 | 0.989949 |
| 19055 | KCNC2     | 0.026793385 | -0.108376592 | 2.91407 | -0.037191 | 0.970333 | 0.989949 |
| 19058 | KIF2B     | 0.027532106 | -0.108376592 | 2.91407 | -0.037191 | 0.970333 | 0.989949 |
| 19063 | KRTAP24-1 | 0.026483807 | -0.108376592 | 2.91407 | -0.037191 | 0.970333 | 0.989949 |
| 19066 | KRTAP4-11 | 0.029365119 | -0.108376592 | 2.91407 | -0.037191 | 0.970333 | 0.989949 |
| 19069 | LOC283914 | 0.02579221  | -0.108376592 | 2.91407 | -0.037191 | 0.970333 | 0.989949 |
| 19070 | LOC286094 | 0.028691363 | -0.108376592 | 2.91407 | -0.037191 | 0.970333 | 0.989949 |
| 19075 | LOC643955 | 0.02579221  | -0.108376592 | 2.91407 | -0.037191 | 0.970333 | 0.989949 |
| 19082 | MBD3L5    | 0.027339914 | -0.108376592 | 2.91407 | -0.037191 | 0.970333 | 0.989949 |
| 19089 | NOTO      | 0.029288288 | -0.108376592 | 2.91407 | -0.037191 | 0.970333 | 0.989949 |
| 19090 | NPBWR2    | 0.028014001 | -0.108376592 | 2.91407 | -0.037191 | 0.970333 | 0.989949 |
| 19097 | OR10H1    | 0.027234363 | -0.108376592 | 2.91407 | -0.037191 | 0.970333 | 0.989949 |
| 19101 | OR10X1    | 0.02579221  | -0.108376592 | 2.91407 | -0.037191 | 0.970333 | 0.989949 |
| 19106 | OR2AG1    | 0.027442045 | -0.108376592 | 2.91407 | -0.037191 | 0.970333 | 0.989949 |
| 19108 | OR2F1     | 0.027600819 | -0.108376592 | 2.91407 | -0.037191 | 0.970333 | 0.989949 |
| 19112 | OR3A4     | 0.028793712 | -0.108376592 | 2.91407 | -0.037191 | 0.970333 | 0.989949 |
| 19113 | OR4C15    | 0.026582753 | -0.108376592 | 2.91407 | -0.037191 | 0.970333 | 0.989949 |

|       |           |             |              |          |           |          |          |
|-------|-----------|-------------|--------------|----------|-----------|----------|----------|
| 19114 | OR4D11    | 0.027373296 | -0.108376592 | 2.91407  | -0.037191 | 0.970333 | 0.989949 |
| 19115 | OR4M1     | 0.02579221  | -0.108376592 | 2.91407  | -0.037191 | 0.970333 | 0.989949 |
| 19116 | OR4N3P    | 0.027283075 | -0.108376592 | 2.91407  | -0.037191 | 0.970333 | 0.989949 |
| 19117 | OR4P4     | 0.026333723 | -0.108376592 | 2.91407  | -0.037191 | 0.970333 | 0.989949 |
| 19133 | OR8A1     | 0.028282224 | -0.108376592 | 2.91407  | -0.037191 | 0.970333 | 0.989949 |
| 19135 | OR8K3     | 0.026582753 | -0.108376592 | 2.91407  | -0.037191 | 0.970333 | 0.989949 |
| 19137 | OR9K2     | 0.02579221  | -0.108376592 | 2.91407  | -0.037191 | 0.970333 | 0.989949 |
| 19139 | PAGE3     | 0.029011362 | -0.108376592 | 2.91407  | -0.037191 | 0.970333 | 0.989949 |
| 19140 | PASD1     | 0.027826219 | -0.108376592 | 2.91407  | -0.037191 | 0.970333 | 0.989949 |
| 19148 | PRAMEF14  | 0.02789109  | -0.108376592 | 2.91407  | -0.037191 | 0.970333 | 0.989949 |
| 19152 | PRLH      | 0.031346963 | -0.108376592 | 2.91407  | -0.037191 | 0.970333 | 0.989949 |
| 19167 | SAA3P     | 0.027895107 | -0.108376592 | 2.91407  | -0.037191 | 0.970333 | 0.989949 |
| 19174 | SMCP      | 0.028183724 | -0.108376592 | 2.91407  | -0.037191 | 0.970333 | 0.989949 |
| 19178 | SNORA25   | 0.03092437  | -0.108376592 | 2.91407  | -0.037191 | 0.970333 | 0.989949 |
| 19184 | SNORD89   | 0.028477486 | -0.108376592 | 2.91407  | -0.037191 | 0.970333 | 0.989949 |
| 19186 | SPATA19   | 0.029472425 | -0.108376592 | 2.91407  | -0.037191 | 0.970333 | 0.989949 |
| 19197 | TAS2R41   | 0.031947057 | -0.108376592 | 2.91407  | -0.037191 | 0.970333 | 0.989949 |
| 19203 | TRIM53    | 0.029018895 | -0.108376592 | 2.91407  | -0.037191 | 0.970333 | 0.989949 |
| 19204 | TRYX3     | 0.027916338 | -0.108376592 | 2.91407  | -0.037191 | 0.970333 | 0.989949 |
| 19208 | VENTXP1   | 0.027655804 | -0.108376592 | 2.91407  | -0.037191 | 0.970333 | 0.989949 |
| 19212 | ZNF479    | 0.026333723 | -0.108376592 | 2.91407  | -0.037191 | 0.970333 | 0.989949 |
| 19213 | ZSWIM2    | 0.027724553 | -0.108376592 | 2.91407  | -0.037191 | 0.970333 | 0.989949 |
| 15416 | GUSBP1    | 110.3429587 | -0.10840331  | 0.122571 | -0.884413 | 0.376473 | 0.478675 |
| 17012 | WDR88     | 3.535694576 | -0.108458047 | 0.24807  | -0.437207 | 0.661961 | 0.762703 |
| 16929 | RNF208    | 108.1872663 | -0.108584689 | 0.238352 | -0.455565 | 0.648703 | 0.751091 |
| 14358 | ILF2      | 2661.250107 | -0.108690031 | 0.089759 | -1.210916 | 0.225928 | 0.308428 |
| 17637 | DNAH9     | 27.42614699 | -0.108727137 | 0.384848 | -0.282519 | 0.777545 | 0.864174 |
| 14391 | TMEM218   | 226.0018006 | -0.108823013 | 0.090646 | -1.200531 | 0.229933 | 0.313176 |
| 18035 | OR2B6     | 0.433849386 | -0.108912875 | 0.546902 | -0.199145 | 0.842149 | 0.915274 |
| 16496 | LOC729375 | 22.24714021 | -0.108979324 | 0.189842 | -0.574053 | 0.565932 | 0.672456 |
| 15970 | PUS7      | 398.6921575 | -0.109198158 | 0.151118 | -0.722604 | 0.469923 | 0.576767 |
| 14952 | FBXO45    | 352.4290575 | -0.109213951 | 0.106832 | -1.022296 | 0.306641 | 0.401984 |
| 17178 | DIRAS3    | 38.76828506 | -0.109791367 | 0.280071 | -0.392013 | 0.695049 | 0.793087 |
| 13376 | RAD51C    | 192.6656128 | -0.109818463 | 0.072302 | -1.518893 | 0.128789 | 0.188736 |
| 17044 | TAS2R4    | 2.947753058 | -0.109925329 | 0.256582 | -0.428422 | 0.668344 | 0.768611 |
| 16505 | DOCK10    | 761.9134781 | -0.109963683 | 0.192463 | -0.571351 | 0.567762 | 0.674263 |
| 15952 | PICK1     | 412.0827646 | -0.110120131 | 0.151638 | -0.726206 | 0.467713 | 0.574702 |
| 14511 | TTC23     | 371.9323129 | -0.110127897 | 0.094673 | -1.16324  | 0.244732 | 0.330576 |
| 16719 | MSH5      | 261.0428648 | -0.110281873 | 0.214059 | -0.515193 | 0.606418 | 0.710951 |
| 15962 | TOM1      | 1523.980765 | -0.11036607  | 0.152344 | -0.724452 | 0.468788 | 0.575662 |
| 15334 | SH3BP5L   | 744.5961128 | -0.110975148 | 0.121926 | -0.910184 | 0.362726 | 0.463684 |
| 15151 | MEPCE     | 1398.649861 | -0.111164972 | 0.115929 | -0.958902 | 0.337608 | 0.436767 |
| 15807 | NDUFB8    | 1755.284376 | -0.111173452 | 0.143657 | -0.773882 | 0.439    | 0.544385 |
| 17114 | GRID2IP   | 3.761011613 | -0.111344692 | 0.272828 | -0.408113 | 0.683191 | 0.782472 |
| 16092 | NDUFA7    | 718.4709862 | -0.111413378 | 0.163025 | -0.683415 | 0.494345 | 0.602141 |
| 17294 | C3orf32   | 4.959314161 | -0.111442553 | 0.302621 | -0.368258 | 0.712681 | 0.807752 |
| 14722 | UGGT1     | 2076.979173 | -0.11156629  | 0.102263 | -1.090978 | 0.275283 | 0.366514 |

|       |           |             |              |          |           |          |          |
|-------|-----------|-------------|--------------|----------|-----------|----------|----------|
| 17947 | HHIP      | 24.55322207 | -0.111604229 | 0.510462 | -0.218634 | 0.826935 | 0.903146 |
| 15005 | KDM1A     | 1058.496426 | -0.111635246 | 0.110928 | -1.00638  | 0.314233 | 0.410477 |
| 15993 | DOCK6     | 1652.764241 | -0.111761694 | 0.156401 | -0.714584 | 0.474866 | 0.581959 |
| 15654 | TAP2      | 1718.354227 | -0.11193889  | 0.136318 | -0.82116  | 0.411555 | 0.515325 |
| 17423 | SIGLEC6   | 3.400754325 | -0.112071838 | 0.333767 | -0.335779 | 0.737038 | 0.829173 |
| 16813 | OLFML2A   | 2635.597906 | -0.112147838 | 0.230009 | -0.487581 | 0.625847 | 0.729711 |
| 17761 | GALNT13   | 10.85570602 | -0.1122404   | 0.441458 | -0.254249 | 0.799303 | 0.882109 |
| 13062 | FBXO18    | 1343.134807 | -0.112278453 | 0.069099 | -1.624894 | 0.104185 | 0.156332 |
| 16075 | LOC284900 | 205.356556  | -0.112590315 | 0.162991 | -0.690777 | 0.489706 | 0.597121 |
| 15025 | DNAL4     | 467.176957  | -0.112615144 | 0.112772 | -0.998609 | 0.317984 | 0.414829 |
| 13015 | CNOT2     | 1343.595609 | -0.112778839 | 0.068799 | -1.639258 | 0.10116  | 0.152349 |
| 14377 | TAB1      | 667.404386  | -0.112904259 | 0.093795 | -1.20373  | 0.228694 | 0.311792 |
| 14514 | CNIH4     | 1204.169941 | -0.112969658 | 0.097275 | -1.161342 | 0.245503 | 0.331484 |
| 14336 | BAZ1B     | 2108.755543 | -0.112985413 | 0.092648 | -1.219508 | 0.222651 | 0.304422 |
| 14786 | UBE2D2    | 2254.398237 | -0.113025634 | 0.105422 | -1.072124 | 0.283665 | 0.376039 |
| 15203 | RNH1      | 2993.469614 | -0.113221689 | 0.1196   | -0.94667  | 0.343807 | 0.443265 |
| 14705 | TOMM22    | 1411.334215 | -0.113262479 | 0.103247 | -1.097006 | 0.272639 | 0.363413 |
| 14215 | MGC2752   | 633.0897785 | -0.113307766 | 0.090411 | -1.253255 | 0.210113 | 0.289724 |
| 16490 | LOC151534 | 428.3096197 | -0.113415022 | 0.197225 | -0.575054 | 0.565255 | 0.671896 |
| 15128 | GTPBP5    | 388.3687768 | -0.113417781 | 0.117521 | -0.965084 | 0.334503 | 0.433407 |
| 14462 | ERAL1     | 921.4081599 | -0.113926105 | 0.096619 | -1.179128 | 0.238347 | 0.323043 |
| 14888 | EIF2B2    | 752.3434879 | -0.114000097 | 0.109622 | -1.039941 | 0.298367 | 0.392802 |
| 15767 | DPH3B     | 16.99736262 | -0.114180171 | 0.145343 | -0.78559  | 0.432108 | 0.537182 |
| 15872 | SMC4      | 998.6443439 | -0.114230217 | 0.152087 | -0.751087 | 0.4526   | 0.558935 |
| 15066 | LMLN      | 384.0633651 | -0.114289522 | 0.115882 | -0.986262 | 0.324005 | 0.421533 |
| 17227 | GPIHBP1   | 222.5938089 | -0.114319045 | 0.29913  | -0.382172 | 0.702334 | 0.79912  |
| 15234 | FRAT2     | 120.8201664 | -0.114354441 | 0.121937 | -0.937815 | 0.34834  | 0.448195 |
| 14390 | EIF1      | 14394.84721 | -0.114365049 | 0.095237 | -1.200842 | 0.229813 | 0.313034 |
| 15630 | TMEM187   | 183.6049156 | -0.114378808 | 0.138354 | -0.826711 | 0.408401 | 0.51216  |
| 16320 | ZNF682    | 70.14201484 | -0.114425151 | 0.183696 | -0.622905 | 0.533347 | 0.640572 |
| 16873 | THNSL2    | 925.204744  | -0.114575074 | 0.242637 | -0.472208 | 0.636778 | 0.739732 |
| 16726 | HSPG2     | 13183.55897 | -0.114674067 | 0.223345 | -0.51344  | 0.607644 | 0.71209  |
| 17189 | RNF165    | 65.16528731 | -0.114702475 | 0.294312 | -0.389731 | 0.696735 | 0.794503 |
| 17665 | LYPD6     | 23.43083648 | -0.114782666 | 0.415189 | -0.276459 | 0.782196 | 0.867921 |
| 16441 | TCEA3     | 2084.709273 | -0.114836703 | 0.194677 | -0.589884 | 0.555268 | 0.661992 |
| 16096 | CDKN1A    | 4572.607329 | -0.115010644 | 0.168519 | -0.682479 | 0.494936 | 0.602711 |
| 16280 | PIGQ      | 1107.948164 | -0.115048545 | 0.181658 | -0.633324 | 0.526522 | 0.63392  |
| 16706 | DYNC111   | 87.49413481 | -0.115135672 | 0.222573 | -0.517293 | 0.604952 | 0.709784 |
| 16687 | CCDC62    | 2.883466743 | -0.115554942 | 0.221661 | -0.521313 | 0.602149 | 0.7073   |
| 16185 | SYP       | 42.51443254 | -0.11577625  | 0.176088 | -0.657492 | 0.510865 | 0.618687 |
| 17146 | TXLNB     | 59.27014659 | -0.115810287 | 0.28959  | -0.399912 | 0.689222 | 0.787906 |
| 16102 | PRIM1     | 107.674977  | -0.115815321 | 0.170087 | -0.680918 | 0.495923 | 0.603688 |
| 16868 | ZNF853    | 102.7222444 | -0.115870479 | 0.244489 | -0.473929 | 0.63555  | 0.73854  |
| 17369 | LOC151174 | 8.322350586 | -0.115909172 | 0.332517 | -0.348582 | 0.727403 | 0.820878 |
| 14769 | SLC7A6    | 727.5849688 | -0.116122067 | 0.107725 | -1.077945 | 0.281058 | 0.373012 |
| 15288 | CYP2R1    | 198.563997  | -0.11620386  | 0.125789 | -0.923798 | 0.355592 | 0.45591  |
| 16186 | NLRC5     | 1053.343548 | -0.116274619 | 0.177055 | -0.656716 | 0.511364 | 0.619254 |

|       |           |             |              |          |           |          |          |
|-------|-----------|-------------|--------------|----------|-----------|----------|----------|
| 16427 | PRKCZ     | 387.5749444 | -0.116558508 | 0.195403 | -0.596502 | 0.55084  | 0.657272 |
| 16599 | SYK       | 1065.007343 | -0.116566725 | 0.212552 | -0.548415 | 0.583407 | 0.688909 |
| 14670 | SNRPD1    | 579.7989032 | -0.11698292  | 0.105332 | -1.110611 | 0.266736 | 0.356393 |
| 16956 | CYR61     | 5360.880889 | -0.117174978 | 0.260539 | -0.44974  | 0.652898 | 0.754655 |
| 16672 | EPSTI1    | 412.9465706 | -0.117308999 | 0.222587 | -0.527026 | 0.598176 | 0.703266 |
| 17484 | IRX2      | 19.73292521 | -0.117496642 | 0.369426 | -0.318052 | 0.750445 | 0.841275 |
| 17572 | GPR27     | 3.45911291  | -0.117594594 | 0.393692 | -0.298697 | 0.765171 | 0.853527 |
| 17916 | ENPP7     | 54.61040292 | -0.11777951  | 0.52345  | -0.225006 | 0.821975 | 0.899234 |
| 16170 | ENTPD7    | 402.3056462 | -0.117822996 | 0.17791  | -0.662261 | 0.507804 | 0.615551 |
| 16115 | C6orf167  | 201.2159433 | -0.117879405 | 0.174306 | -0.676278 | 0.498864 | 0.606779 |
| 14380 | KDM4A     | 945.8461954 | -0.11793098  | 0.098012 | -1.203233 | 0.228886 | 0.311988 |
| 14816 | ZCRB1     | 1038.949443 | -0.117961302 | 0.111316 | -1.059694 | 0.289284 | 0.382711 |
| 15787 | STK36     | 630.0677892 | -0.118155943 | 0.151522 | -0.779796 | 0.435511 | 0.540726 |
| 14094 | BET1L     | 2142.338361 | -0.118254553 | 0.091698 | -1.289614 | 0.197185 | 0.274232 |
| 15402 | FOKK1     | 1201.009867 | -0.118286421 | 0.13293  | -0.889842 | 0.37355  | 0.47539  |
| 15708 | C5orf56   | 112.4227708 | -0.118322914 | 0.147348 | -0.803015 | 0.421966 | 0.526544 |
| 15939 | FOSL2     | 3213.639482 | -0.118402858 | 0.162058 | -0.730621 | 0.465011 | 0.571847 |
| 15389 | GHDC      | 1411.141843 | -0.118481708 | 0.132681 | -0.892984 | 0.371866 | 0.473646 |
| 16747 | CTF1      | 106.7020141 | -0.118506899 | 0.234564 | -0.505222 | 0.613403 | 0.717938 |
| 15496 | C2orf16   | 32.0245225  | -0.118979069 | 0.137917 | -0.862685 | 0.388311 | 0.491177 |
| 16365 | NPIP      | 681.4403714 | -0.119152603 | 0.195566 | -0.60927  | 0.542346 | 0.649589 |
| 17074 | SLCO1C1   | 20.16584364 | -0.119402515 | 0.284171 | -0.420178 | 0.674355 | 0.774162 |
| 13776 | FUS       | 4306.936553 | -0.119506518 | 0.085691 | -1.394628 | 0.163128 | 0.232105 |
| 16814 | IL33      | 320.9577062 | -0.119613026 | 0.245487 | -0.487247 | 0.626083 | 0.729845 |
| 13474 | ZNF673    | 268.8468462 | -0.11962536  | 0.079965 | -1.495965 | 0.134663 | 0.195898 |
| 16545 | OC1002681 | 13.00999721 | -0.11976466  | 0.214172 | -0.559199 | 0.576026 | 0.68234  |
| 13574 | INRNPA1L  | 2081.490838 | -0.11978286  | 0.08188  | -1.462904 | 0.143494 | 0.207206 |
| 15349 | C20orf96  | 246.361711  | -0.119984703 | 0.132521 | -0.905399 | 0.365254 | 0.466437 |
| 16159 | CCDC96    | 56.10389677 | -0.120053346 | 0.180797 | -0.664022 | 0.506676 | 0.614595 |
| 15246 | MLL4      | 896.9555607 | -0.120136516 | 0.128579 | -0.934338 | 0.35013  | 0.450144 |
| 12706 | NDRG3     | 1017.544215 | -0.120204459 | 0.069422 | -1.731507 | 0.083361 | 0.128598 |
| 13948 | ODF2      | 631.4050689 | -0.120205402 | 0.090087 | -1.33433  | 0.182096 | 0.255897 |
| 16172 | SNORA8    | 329.0051196 | -0.120345171 | 0.181943 | -0.661445 | 0.508327 | 0.616109 |
| 15140 | FAM119B   | 425.346696  | -0.12042457  | 0.125097 | -0.962649 | 0.335724 | 0.434645 |
| 14592 | C11orf68  | 818.8041534 | -0.120599727 | 0.105926 | -1.138531 | 0.254899 | 0.34239  |
| 14021 | INTS7     | 297.2482468 | -0.120623676 | 0.091868 | -1.313007 | 0.189181 | 0.26447  |
| 16618 | DNHD1     | 202.4631594 | -0.120684369 | 0.221692 | -0.544379 | 0.58618  | 0.691402 |
| 17945 | PGA5      | 22.07873415 | -0.120802993 | 0.550979 | -0.219252 | 0.826454 | 0.902771 |
| 15924 | CCDC88A   | 1124.919725 | -0.120882345 | 0.164413 | -0.735235 | 0.462196 | 0.568922 |
| 14995 | RPS27L    | 1867.480102 | -0.1213101   | 0.120334 | -1.008113 | 0.3134   | 0.409667 |
| 16262 | B3GNT9    | 665.6478648 | -0.12135906  | 0.190493 | -0.637079 | 0.524073 | 0.631679 |
| 14855 | RNF25     | 384.7555881 | -0.121472894 | 0.115547 | -1.051287 | 0.293127 | 0.386778 |
| 15104 | TRIM41    | 852.8812657 | -0.12151815  | 0.124624 | -0.975078 | 0.329521 | 0.427632 |
| 15078 | C22orf46  | 311.8198706 | -0.121572377 | 0.123594 | -0.983647 | 0.325289 | 0.422867 |
| 13940 | STAT3     | 4942.174548 | -0.121901128 | 0.091059 | -1.33871  | 0.180665 | 0.25405  |
| 16413 | CDH26     | 10.16804    | -0.122024686 | 0.203729 | -0.598957 | 0.549202 | 0.655801 |
| 15517 | DPH1      | 690.3169843 | -0.122050223 | 0.142988 | -0.853568 | 0.393344 | 0.49687  |

|       |           |             |              |          |           |          |          |
|-------|-----------|-------------|--------------|----------|-----------|----------|----------|
| 14192 | HPS6      | 412.9844226 | -0.12212255  | 0.096951 | -1.259635 | 0.207801 | 0.287    |
| 16669 | FAM124B   | 48.95171234 | -0.122226587 | 0.23118  | -0.528708 | 0.597008 | 0.702019 |
| 14534 | C17orf81  | 691.8064602 | -0.122354316 | 0.105889 | -1.155497 | 0.247887 | 0.334308 |
| 16574 | SIGIRR    | 500.3962903 | -0.122368248 | 0.220971 | -0.553775 | 0.579733 | 0.685613 |
| 12845 | C20orf4   | 991.2050768 | -0.122374006 | 0.072318 | -1.692164 | 0.090615 | 0.138275 |
| 17113 | CTNNA3    | 3.882015623 | -0.122407452 | 0.299421 | -0.408813 | 0.682677 | 0.781929 |
| 16609 | SOX7      | 277.0681184 | -0.122497712 | 0.223858 | -0.547211 | 0.584234 | 0.68948  |
| 14536 | ARFIP2    | 900.776932  | -0.122554312 | 0.106137 | -1.154685 | 0.248219 | 0.33471  |
| 15814 | PRDX5     | 4072.616497 | -0.122559853 | 0.158624 | -0.772642 | 0.439735 | 0.545038 |
| 16254 | C21orf67  | 38.11273638 | -0.122744283 | 0.191959 | -0.639429 | 0.522544 | 0.630106 |
| 14648 | ZNF23     | 271.27584   | -0.122804683 | 0.109845 | -1.117982 | 0.263575 | 0.352716 |
| 14631 | TMEM11    | 441.8361858 | -0.122879492 | 0.109483 | -1.122361 | 0.261709 | 0.350609 |
| 17321 | C1QL3     | 67.31169568 | -0.123166864 | 0.340223 | -0.362018 | 0.717339 | 0.811763 |
| 16287 | FUNDC2P2  | 5.034743362 | -0.123713086 | 0.195874 | -0.631594 | 0.527652 | 0.634978 |
| 16278 | RHOJ      | 351.8292381 | -0.123817176 | 0.195423 | -0.633584 | 0.526352 | 0.633849 |
| 16872 | ITGB3     | 690.3104417 | -0.123859237 | 0.262126 | -0.472518 | 0.636557 | 0.739518 |
| 14924 | C3orf75   | 305.5529531 | -0.123890092 | 0.120336 | -1.029531 | 0.30323  | 0.398259 |
| 14330 | MTA3      | 691.5794081 | -0.123895979 | 0.101397 | -1.221888 | 0.22175  | 0.303316 |
| 15240 | FNFRSF10I | 2374.29359  | -0.124012057 | 0.132486 | -0.936041 | 0.349252 | 0.449192 |
| 15435 | YY2       | 21.62390775 | -0.124201237 | 0.141541 | -0.877492 | 0.380219 | 0.482843 |
| 16118 | TSSK6     | 18.8092301  | -0.124371052 | 0.184025 | -0.675837 | 0.499144 | 0.607006 |
| 12551 | MAX       | 1298.127467 | -0.124433305 | 0.0695   | -1.790416 | 0.073387 | 0.114609 |
| 15938 | MDFIC     | 1647.838334 | -0.124670605 | 0.170611 | -0.730731 | 0.464944 | 0.571801 |
| 14467 | EIF4G1    | 6637.121243 | -0.124922405 | 0.106035 | -1.178127 | 0.238746 | 0.323471 |
| 15300 | RHEB      | 1447.624411 | -0.125005618 | 0.135747 | -0.920872 | 0.357117 | 0.457507 |
| 14433 | RAB1B     | 4350.66905  | -0.125039168 | 0.105226 | -1.188294 | 0.234718 | 0.318763 |
| 16341 | PRELID2   | 148.0096411 | -0.125042105 | 0.203211 | -0.615332 | 0.538336 | 0.645663 |
| 15572 | C12orf62  | 804.5289059 | -0.125063063 | 0.148488 | -0.842243 | 0.399652 | 0.503023 |
| 16138 | PIM1      | 1211.184132 | -0.125266653 | 0.186967 | -0.669994 | 0.502861 | 0.610769 |
| 13635 | MYL12A    | 5609.985583 | -0.125335311 | 0.086861 | -1.442949 | 0.149035 | 0.214245 |
| 17372 | DNAI1     | 8.030826693 | -0.125571214 | 0.360709 | -0.348123 | 0.727748 | 0.821125 |
| 15413 | TRAM1     | 8653.627911 | -0.125604256 | 0.14189  | -0.88522  | 0.376038 | 0.478214 |
| 12981 | SMARCD1   | 1442.089145 | -0.12567145  | 0.076168 | -1.649924 | 0.098958 | 0.149425 |
| 17358 | GLDC      | 332.6358168 | -0.125703711 | 0.358435 | -0.350701 | 0.725813 | 0.819602 |
| 16013 | SPINT2    | 5400.178188 | -0.125739313 | 0.177623 | -0.707899 | 0.479008 | 0.586338 |
| 17657 | GSTM1     | 492.9175521 | -0.125759365 | 0.452121 | -0.278154 | 0.780894 | 0.866869 |
| 15665 | ITGB3BP   | 213.8925807 | -0.125840188 | 0.153829 | -0.81805  | 0.413329 | 0.517182 |
| 15710 | DERA      | 1514.436434 | -0.125994923 | 0.157306 | -0.800952 | 0.423159 | 0.527955 |
| 16191 | C9orf98   | 61.60337203 | -0.126090881 | 0.19222  | -0.655971 | 0.511843 | 0.619643 |
| 14545 | RFT1      | 424.7986339 | -0.126226628 | 0.109555 | -1.152175 | 0.249249 | 0.335891 |
| 14376 | FOXK2     | 851.5436561 | -0.126485427 | 0.105021 | -1.204377 | 0.228444 | 0.311473 |
| 14908 | ATL3      | 566.050491  | -0.126574719 | 0.122413 | -1.033997 | 0.301137 | 0.395919 |
| 14969 | POFUT1    | 2292.182657 | -0.126575869 | 0.124592 | -1.015922 | 0.309666 | 0.40549  |
| 16352 | RAB3IL1   | 461.7170118 | -0.126617007 | 0.206381 | -0.613511 | 0.539538 | 0.64674  |
| 13597 | PYGO2     | 901.7634167 | -0.126619366 | 0.086927 | -1.456622 | 0.145221 | 0.209345 |
| 13555 | TATDN2    | 1015.001389 | -0.126943091 | 0.086419 | -1.468933 | 0.141851 | 0.205121 |
| 14601 | DDHD1     | 416.2829505 | -0.127114072 | 0.112146 | -1.133474 | 0.257015 | 0.345028 |

|       |           |             |              |          |           |          |          |
|-------|-----------|-------------|--------------|----------|-----------|----------|----------|
| 14835 | NDUFV3    | 710.6619668 | -0.127255185 | 0.120502 | -1.056042 | 0.290949 | 0.384418 |
| 13108 | ILK       | 3237.866164 | -0.127463803 | 0.079263 | -1.608119 | 0.107809 | 0.161212 |
| 14942 | POMGNT1   | 2052.262692 | -0.127552421 | 0.124542 | -1.024169 | 0.305755 | 0.401092 |
| 13036 | GNB1      | 8317.857349 | -0.127768398 | 0.078245 | -1.63293  | 0.102484 | 0.154095 |
| 17474 | IRX1      | 9.339951749 | -0.127939599 | 0.400121 | -0.319752 | 0.749156 | 0.840319 |
| 13786 | RNF40     | 2285.477126 | -0.127985917 | 0.092005 | -1.391078 | 0.164202 | 0.233463 |
| 14717 | ATN1      | 3668.838326 | -0.128155943 | 0.117294 | -1.092605 | 0.274567 | 0.365686 |
| 16343 | ZC3HAV1I  | 91.84458639 | -0.128311078 | 0.208528 | -0.615319 | 0.538344 | 0.645663 |
| 13773 | UBQLN4    | 867.0266033 | -0.128349536 | 0.091978 | -1.395434 | 0.162885 | 0.231826 |
| 9891  | HNRNPL    | 4185.218887 | -0.12849423  | 0.047755 | -2.690722 | 0.00713  | 0.014128 |
| 15103 | MED16     | 1006.133505 | -0.128849961 | 0.132136 | -0.975134 | 0.329494 | 0.427624 |
| 17307 | SPTBN5    | 79.04009407 | -0.128881143 | 0.352643 | -0.365472 | 0.714759 | 0.809499 |
| 16855 | LOC113230 | 134.9723484 | -0.128890526 | 0.270174 | -0.477064 | 0.633316 | 0.736408 |
| 16757 | DACT1     | 250.1506512 | -0.128927177 | 0.256684 | -0.50228  | 0.61547  | 0.719928 |
| 14242 | SNRPB2    | 1103.741054 | -0.128983273 | 0.103703 | -1.243779 | 0.213581 | 0.293948 |
| 13744 | FXR1      | 2135.605893 | -0.12920341  | 0.092029 | -1.403936 | 0.160338 | 0.228666 |
| 17528 | FAM55B    | 0.986308863 | -0.129264906 | 0.419675 | -0.308012 | 0.758073 | 0.847729 |
| 14573 | DTNBP1    | 392.7587611 | -0.129322953 | 0.112938 | -1.145074 | 0.252178 | 0.339185 |
| 16605 | RND1      | 80.0167298  | -0.129393754 | 0.236238 | -0.547726 | 0.58388  | 0.689228 |
| 14106 | GNL1      | 1064.283334 | -0.129558101 | 0.100605 | -1.287788 | 0.19782  | 0.27488  |
| 14285 | MSH6      | 1011.717679 | -0.129700255 | 0.105095 | -1.234125 | 0.217156 | 0.297969 |
| 17464 | FAM66E    | 1.121234378 | -0.129725012 | 0.401445 | -0.323145 | 0.746586 | 0.837939 |
| 17033 | IGFALS    | 6.459601117 | -0.129940011 | 0.300132 | -0.432942 | 0.665057 | 0.765325 |
| 16854 | CRYAB     | 24125.76555 | -0.130058666 | 0.272396 | -0.477461 | 0.633034 | 0.736211 |
| 17147 | GLYATL2   | 24.65714826 | -0.130232575 | 0.326201 | -0.399241 | 0.689716 | 0.788425 |
| 14063 | VPS4A     | 2326.563078 | -0.130424083 | 0.100448 | -1.298427 | 0.194141 | 0.270593 |
| 15123 | ZWILCH    | 199.956804  | -0.130618172 | 0.135131 | -0.966607 | 0.333741 | 0.432563 |
| 14105 | ABCF3     | 1031.221269 | -0.131032551 | 0.101746 | -1.287837 | 0.197803 | 0.274876 |
| 17248 | IGDCC3    | 3.428200224 | -0.131471853 | 0.34832  | -0.377445 | 0.705843 | 0.802175 |
| 14015 | NSMCE2    | 283.3136373 | -0.13170601  | 0.1002   | -1.314437 | 0.188699 | 0.26391  |
| 15002 | CUX1      | 2266.520546 | -0.131862621 | 0.130978 | -1.006756 | 0.314052 | 0.410328 |
| 15100 | NSA2      | 2189.953702 | -0.132043612 | 0.135215 | -0.976545 | 0.328794 | 0.426801 |
| 14807 | ZNF622    | 827.3237198 | -0.132084647 | 0.124239 | -1.06315  | 0.287714 | 0.380866 |
| 14535 | PHF13     | 452.6767754 | -0.132107573 | 0.114384 | -1.154947 | 0.248112 | 0.334589 |
| 15481 | ITPRIPL2  | 1596.24391  | -0.132144403 | 0.152547 | -0.866252 | 0.386352 | 0.489173 |
| 16383 | CES2      | 6346.449337 | -0.132502813 | 0.219244 | -0.604361 | 0.545603 | 0.652773 |
| 13806 | VPS72     | 677.8175965 | -0.132685792 | 0.095752 | -1.385719 | 0.165833 | 0.23544  |
| 16532 | MAK       | 5.020822332 | -0.132731644 | 0.235406 | -0.563842 | 0.572862 | 0.679208 |
| 13210 | EIF2AK1   | 3596.463656 | -0.132928399 | 0.084293 | -1.576973 | 0.114802 | 0.170343 |
| 18524 | OR2H1     | 0.521931405 | -0.133145385 | 1.265772 | -0.105189 | 0.916226 | 0.969496 |
| 14257 | TRRAP     | 1694.683678 | -0.133326678 | 0.107432 | -1.241032 | 0.214594 | 0.295031 |
| 15920 | TRIM69    | 32.41463368 | -0.133545619 | 0.181438 | -0.736039 | 0.461707 | 0.568463 |
| 13716 | OSTF1     | 893.0373306 | -0.133636899 | 0.094516 | -1.41391  | 0.157388 | 0.224917 |
| 16790 | PCDHB15   | 139.6497937 | -0.133840573 | 0.271851 | -0.492331 | 0.622486 | 0.726703 |
| 15628 | C20orf12  | 124.1583588 | -0.134017564 | 0.162087 | -0.826823 | 0.408337 | 0.512136 |
| 14052 | OTUB1     | 1551.899034 | -0.134066481 | 0.103073 | -1.300693 | 0.193364 | 0.269736 |
| 15966 | C17orf72  | 61.16368726 | -0.134162331 | 0.185432 | -0.723511 | 0.469366 | 0.576227 |



|       |           |             |              |          |           |          |          |
|-------|-----------|-------------|--------------|----------|-----------|----------|----------|
| 12922 | HECTD3    | 1160.221448 | -0.134251616 | 0.080578 | -1.666111 | 0.095691 | 0.145145 |
| 12957 | CLASP1    | 1773.04626  | -0.134498146 | 0.081293 | -1.654488 | 0.098028 | 0.148295 |
| 13734 | FBXL12    | 314.259356  | -0.134563848 | 0.095704 | -1.40604  | 0.159712 | 0.227939 |
| 17090 | OSBPL6    | 30.87530472 | -0.134564784 | 0.323693 | -0.415717 | 0.677617 | 0.777178 |
| 16038 | HELLS     | 64.70318111 | -0.135077907 | 0.193026 | -0.699791 | 0.484058 | 0.591596 |
| 11773 | VPS33A    | 536.6750665 | -0.135143964 | 0.066591 | -2.029475 | 0.04241  | 0.07061  |
| 13458 | GSK3A     | 1418.462983 | -0.13521262  | 0.090151 | -1.499847 | 0.133654 | 0.194661 |
| 14053 | SLC35B2   | 1271.266416 | -0.135491369 | 0.104193 | -1.300387 | 0.193468 | 0.269848 |
| 13983 | ERLIN1    | 1094.998022 | -0.135600787 | 0.102433 | -1.323798 | 0.18557  | 0.260112 |
| 12053 | LOC493754 | 473.609049  | -0.136069941 | 0.070038 | -1.942809 | 0.052039 | 0.084628 |
| 15409 | ANO6      | 5151.401923 | -0.136215347 | 0.153561 | -0.887043 | 0.375056 | 0.477089 |
| 17439 | PTPN5     | 6.745172111 | -0.136246629 | 0.413366 | -0.329603 | 0.7417   | 0.833652 |
| 16410 | HMGB3     | 406.081152  | -0.136290983 | 0.227447 | -0.599222 | 0.549025 | 0.655785 |
| 15996 | SFXN5     | 405.9678092 | -0.136413347 | 0.190986 | -0.714259 | 0.475067 | 0.582132 |
| 13772 | ORMDL3    | 1092.892206 | -0.136650753 | 0.09793  | -1.395396 | 0.162897 | 0.231826 |
| 16123 | JAG2      | 737.4454567 | -0.136654014 | 0.202552 | -0.674661 | 0.499891 | 0.607726 |
| 13919 | SKIV2L    | 867.1183191 | -0.137072364 | 0.101993 | -1.343935 | 0.17897  | 0.252028 |
| 15805 | MZF1      | 300.1440133 | -0.137311003 | 0.177348 | -0.774246 | 0.438786 | 0.544172 |
| 15504 | SH3BP2    | 2991.076426 | -0.137442384 | 0.159819 | -0.859988 | 0.389796 | 0.492801 |
| 14323 | COASY     | 1351.461334 | -0.137461422 | 0.112352 | -1.223486 | 0.221146 | 0.302638 |
| 14741 | DDX51     | 491.8377149 | -0.137491459 | 0.126508 | -1.086821 | 0.277116 | 0.368479 |
| 14806 | PPP1R12C  | 1166.149503 | -0.137524232 | 0.129343 | -1.063249 | 0.287669 | 0.380832 |
| 11542 | PWP1      | 1059.638217 | -0.137819614 | 0.065618 | -2.100323 | 0.0357   | 0.060628 |
| 13125 | ZNF343    | 280.6909454 | -0.138079343 | 0.086143 | -1.6029   | 0.108957 | 0.162717 |
| 16503 | TAGAP     | 260.9215016 | -0.138169165 | 0.24153  | -0.572058 | 0.567283 | 0.673775 |
| 16981 | CD1C      | 27.03355638 | -0.138190794 | 0.311451 | -0.443701 | 0.657259 | 0.75866  |
| 17226 | SYTL5     | 14.22450673 | -0.13829365  | 0.361392 | -0.382669 | 0.701965 | 0.798749 |
| 12384 | UBE2Q1    | 1855.50734  | -0.138299991 | 0.075129 | -1.840835 | 0.065646 | 0.103902 |
| 16582 | FAM162B   | 41.0828291  | -0.138325864 | 0.250663 | -0.55184  | 0.581058 | 0.686848 |
| 13890 | ZNF362    | 687.9243506 | -0.138352491 | 0.102373 | -1.351459 | 0.176549 | 0.249138 |
| 13566 | LOH12CR1  | 88.66703429 | -0.138365321 | 0.094447 | -1.464997 | 0.142922 | 0.206502 |
| 17053 | KCNT1     | 2.533455977 | -0.13849546  | 0.324534 | -0.426752 | 0.66956  | 0.769579 |
| 11738 | CNO       | 256.4415269 | -0.138608291 | 0.067898 | -2.041408 | 0.04121  | 0.068816 |
| 12933 | AKIRIN2   | 610.7547291 | -0.138975573 | 0.08352  | -1.663976 | 0.096117 | 0.145663 |
| 14436 | NT5C3L    | 812.3497264 | -0.139122183 | 0.117154 | -1.18752  | 0.235022 | 0.31911  |
| 15779 | SOAT1     | 1514.256036 | -0.139161342 | 0.178122 | -0.781269 | 0.434644 | 0.539924 |
| 13583 | C14orf166 | 1746.865324 | -0.139182791 | 0.095349 | -1.459715 | 0.144369 | 0.208332 |
| 14788 | P4HTM     | 620.5838711 | -0.139697089 | 0.130407 | -1.071239 | 0.284062 | 0.376515 |
| 17590 | C4orf22   | 1.046226438 | -0.139908747 | 0.472832 | -0.295895 | 0.76731  | 0.855034 |
| 17413 | TM4SF5    | 176.5596209 | -0.139980397 | 0.413833 | -0.338253 | 0.735172 | 0.827549 |
| 16074 | DC1001012 | 17.611077   | -0.139984314 | 0.202538 | -0.691152 | 0.48947  | 0.596871 |
| 16248 | HSPA12B   | 242.9929025 | -0.139994158 | 0.218555 | -0.640545 | 0.521818 | 0.629486 |
| 13140 | UIMC1     | 450.9223154 | -0.140168164 | 0.087779 | -1.59683  | 0.110304 | 0.16454  |
| 14724 | ABHD4     | 906.7750166 | -0.140184227 | 0.128527 | -1.090699 | 0.275405 | 0.366577 |
| 16524 | SLC6A10P  | 42.52594698 | -0.14032666  | 0.248128 | -0.565541 | 0.571706 | 0.678166 |
| 15373 | CCDC112   | 188.3795968 | -0.140696788 | 0.156575 | -0.898591 | 0.368871 | 0.47032  |
| 13011 | UBTF      | 2152.107942 | -0.140730516 | 0.085814 | -1.639939 | 0.101018 | 0.152183 |

|       |          |             |              |          |           |          |          |
|-------|----------|-------------|--------------|----------|-----------|----------|----------|
| 16863 | ATP8A2   | 18.95482061 | -0.140870753 | 0.296234 | -0.475539 | 0.634403 | 0.737409 |
| 14947 | AXIN1    | 667.167152  | -0.140912036 | 0.137756 | -1.022911 | 0.30635  | 0.40171  |
| 15758 | CD1D     | 172.0072697 | -0.141187718 | 0.179391 | -0.787037 | 0.43126  | 0.536432 |
| 15084 | TEX2     | 1509.239876 | -0.14137673  | 0.14417  | -0.980626 | 0.326777 | 0.424633 |
| 14688 | EIF3E    | 6033.546235 | -0.141386907 | 0.128014 | -1.10446  | 0.269393 | 0.359503 |
| 14661 | TRIM34   | 195.1699025 | -0.141415639 | 0.127045 | -1.113113 | 0.26566  | 0.355173 |
| 16129 | CYTSB    | 446.7437237 | -0.141553507 | 0.210406 | -0.672765 | 0.501097 | 0.608965 |
| 15117 | CUTA     | 2149.083078 | -0.141659159 | 0.146022 | -0.97012  | 0.331987 | 0.43046  |
| 13568 | TMUB2    | 949.396098  | -0.141698147 | 0.09674  | -1.464729 | 0.142995 | 0.206578 |
| 13508 | ZNF16    | 228.9810817 | -0.141882856 | 0.095518 | -1.485411 | 0.137435 | 0.199427 |
| 14379 | DHX32    | 885.7679081 | -0.141894785 | 0.117919 | -1.203322 | 0.228852 | 0.311963 |
| 16083 | CCDC11   | 34.20987321 | -0.141987734 | 0.206606 | -0.687239 | 0.491932 | 0.599538 |
| 14190 | GMPS     | 894.9562273 | -0.142020427 | 0.112656 | -1.260651 | 0.207435 | 0.286535 |
| 16358 | CDHR3    | 96.92846758 | -0.142214799 | 0.232505 | -0.611662 | 0.540761 | 0.647968 |
| 13240 | SFT2D3   | 341.2419653 | -0.142477304 | 0.090938 | -1.566755 | 0.117172 | 0.173466 |
| 13236 | EIF4E2   | 1481.548592 | -0.142537844 | 0.090924 | -1.567654 | 0.116962 | 0.173194 |
| 15169 | FOXP4    | 674.9890943 | -0.142540818 | 0.149026 | -0.956486 | 0.338827 | 0.437795 |
| 14692 | ZBTB7B   | 1002.861663 | -0.142558847 | 0.129272 | -1.102783 | 0.270122 | 0.360377 |
| 17668 | PLP1     | 3.20897674  | -0.14256476  | 0.517056 | -0.275724 | 0.78276  | 0.868423 |
| 14227 | TMED2    | 6741.648642 | -0.142618057 | 0.114043 | -1.250565 | 0.211093 | 0.29083  |
| 12890 | RBM22    | 1193.953438 | -0.143230551 | 0.085458 | -1.676042 | 0.09373  | 0.142529 |
| 16926 | FOXC2    | 121.9821395 | -0.14345604  | 0.313771 | -0.4572   | 0.647528 | 0.749863 |
| 14880 | TMED1    | 754.6935961 | -0.143486225 | 0.137552 | -1.043145 | 0.296881 | 0.391073 |
| 13371 | CAMK2G   | 549.1464251 | -0.143504361 | 0.094385 | -1.520422 | 0.128405 | 0.188233 |
| 11617 | C1orf77  | 1372.347793 | -0.143525164 | 0.069178 | -2.074737 | 0.038011 | 0.064135 |
| 11959 | ANP32A   | 2564.951092 | -0.143637612 | 0.072845 | -1.971826 | 0.04863  | 0.079705 |
| 14356 | LSM11    | 199.1986174 | -0.143678025 | 0.1185   | -1.212468 | 0.225333 | 0.307667 |
| 13430 | MTHFSD   | 262.1169263 | -0.143718139 | 0.095474 | -1.505309 | 0.132245 | 0.19301  |
| 15188 | SPA17    | 144.4151215 | -0.143815649 | 0.151126 | -0.951625 | 0.341287 | 0.440451 |
| 14763 | LOC93622 | 258.239486  | -0.143848663 | 0.133097 | -1.08078  | 0.279795 | 0.371487 |
| 14564 | FLYWCH1  | 756.4814878 | -0.143883058 | 0.12542  | -1.147208 | 0.251296 | 0.338207 |
| 14369 | SRGAP2   | 1070.152172 | -0.144138089 | 0.119379 | -1.207396 | 0.22728  | 0.310036 |
| 13339 | EIF2S3   | 4843.166345 | -0.144699275 | 0.094473 | -1.531649 | 0.125609 | 0.184576 |
| 15575 | ZNF69    | 79.87169611 | -0.144761341 | 0.171969 | -0.84179  | 0.399906 | 0.503278 |
| 17322 | CDHR5    | 3671.107503 | -0.14487509  | 0.400563 | -0.361679 | 0.717592 | 0.812003 |
| 14383 | FANCL    | 251.4886019 | -0.145479251 | 0.120973 | -1.202574 | 0.229141 | 0.31225  |
| 16937 | CCR3     | 2.774941599 | -0.145481608 | 0.320565 | -0.453828 | 0.649953 | 0.752183 |
| 15074 | APOA1BP  | 1554.53512  | -0.145483761 | 0.147675 | -0.985162 | 0.324545 | 0.422011 |
| 13368 | CHMP4A   | 971.6678567 | -0.145560481 | 0.095682 | -1.521288 | 0.128187 | 0.187945 |
| 14649 | ARMC5    | 305.7446684 | -0.145602442 | 0.130282 | -1.117599 | 0.263738 | 0.352894 |
| 16858 | ATP2A1   | 20.39792558 | -0.145664121 | 0.305412 | -0.476943 | 0.633403 | 0.736465 |
| 13123 | PREP     | 623.6953761 | -0.145756382 | 0.090902 | -1.603449 | 0.108836 | 0.162561 |
| 15280 | MRM1     | 135.2980762 | -0.145757389 | 0.157492 | -0.92549  | 0.354711 | 0.455007 |
| 14457 | THOC7    | 778.0161312 | -0.146240466 | 0.123958 | -1.179757 | 0.238097 | 0.322815 |
| 14454 | CHIC2    | 213.7768596 | -0.146358537 | 0.123903 | -1.181237 | 0.237509 | 0.322064 |
| 16466 | C22orf36 | 531.1944432 | -0.146418168 | 0.251352 | -0.582523 | 0.560215 | 0.666875 |
| 14607 | XAB2     | 1020.421296 | -0.14647158  | 0.129402 | -1.13191  | 0.257672 | 0.345786 |

|       |           |             |              |          |           |          |          |
|-------|-----------|-------------|--------------|----------|-----------|----------|----------|
| 13509 | GRIPAP1   | 875.9905026 | -0.146550912 | 0.098699 | -1.48482  | 0.137592 | 0.199625 |
| 17481 | CAPN6     | 412.6048796 | -0.146880798 | 0.460942 | -0.318653 | 0.749989 | 0.840908 |
| 16058 | BST1      | 166.8127844 | -0.146922993 | 0.211074 | -0.696072 | 0.486384 | 0.593698 |
| 13634 | CC2D1B    | 839.5313984 | -0.147031865 | 0.10189  | -1.443049 | 0.149007 | 0.21422  |
| 12665 | KIAA1310  | 1455.882876 | -0.14713899  | 0.084003 | -1.751596 | 0.079843 | 0.12357  |
| 17651 | SERPINE3  | 0.581058589 | -0.147339141 | 0.527126 | -0.279514 | 0.77985  | 0.866005 |
| 14800 | FKBP4     | 2499.437298 | -0.147474573 | 0.138443 | -1.06524  | 0.286767 | 0.379792 |
| 13970 | CFDP1     | 1372.095517 | -0.14748652  | 0.111043 | -1.328189 | 0.184116 | 0.258329 |
| 14963 | HSBP1     | 3061.999257 | -0.147613096 | 0.144999 | -1.018031 | 0.308663 | 0.404338 |
| 12870 | C12orf76  | 129.363625  | -0.147926632 | 0.087685 | -1.68702  | 0.0916   | 0.139506 |
| 13245 | DGCR8     | 610.4225191 | -0.147957812 | 0.09459  | -1.564202 | 0.11777  | 0.174286 |
| 15051 | RALGDS    | 1265.591764 | -0.147968033 | 0.149432 | -0.990205 | 0.322074 | 0.419461 |
| 12354 | DEDD      | 715.1942865 | -0.148099353 | 0.08012  | -1.848479 | 0.064533 | 0.102389 |
| 12407 | UBE2R2    | 1882.026763 | -0.148131089 | 0.080773 | -1.833914 | 0.066667 | 0.105322 |
| 16658 | ZFP92     | 4.933187935 | -0.148234305 | 0.278435 | -0.532385 | 0.59446  | 0.699484 |
| 16339 | EFCAB10   | 7.884842596 | -0.148251241 | 0.240683 | -0.615961 | 0.537921 | 0.645314 |
| 16426 | CLU       | 34202.95006 | -0.148355172 | 0.248543 | -0.596899 | 0.550575 | 0.656996 |
| 16239 | PARVB     | 921.1668304 | -0.14849294  | 0.230511 | -0.644189 | 0.519453 | 0.626996 |
| 16344 | ADAP1     | 243.202132  | -0.148662154 | 0.241654 | -0.615185 | 0.538432 | 0.645701 |
| 15442 | FBXW5     | 2208.853514 | -0.148874513 | 0.17007  | -0.875373 | 0.381371 | 0.484086 |
| 15490 | GUCY1B3   | 1490.712258 | -0.148878716 | 0.172078 | -0.865182 | 0.386939 | 0.489631 |
| 14200 | ATP2B4    | 3942.982745 | -0.149094301 | 0.118557 | -1.257572 | 0.208547 | 0.287868 |
| 14766 | C15orf58  | 42.63016579 | -0.149157142 | 0.138185 | -1.0794   | 0.280409 | 0.372227 |
| 15465 | AGFG2     | 488.5648316 | -0.149557809 | 0.171685 | -0.871117 | 0.38369  | 0.486306 |
| 17458 | KRTAP5-10 | 1.949813916 | -0.149975916 | 0.461678 | -0.32485  | 0.745295 | 0.836868 |
| 12250 | NMT1      | 2425.065251 | -0.150027764 | 0.07972  | -1.881937 | 0.059845 | 0.095757 |
| 14709 | USP35     | 168.1317472 | -0.150036451 | 0.136987 | -1.095257 | 0.273404 | 0.364334 |
| 16134 | GUCA1B    | 21.53938431 | -0.150162462 | 0.223653 | -0.67141  | 0.50196  | 0.609825 |
| 15942 | GJC1      | 731.2110939 | -0.150232333 | 0.206444 | -0.727714 | 0.466789 | 0.573926 |
| 12938 | WSB2      | 2181.648623 | -0.150377617 | 0.09042  | -1.663095 | 0.096294 | 0.145884 |
| 14245 | GNAI3     | 2142.381801 | -0.150397891 | 0.120963 | -1.243342 | 0.213742 | 0.294107 |
| 11932 | THAP11    | 623.8239148 | -0.150450116 | 0.076016 | -1.979201 | 0.047793 | 0.078511 |
| 14597 | AARS      | 3397.600994 | -0.150611192 | 0.132546 | -1.13629  | 0.255835 | 0.343538 |
| 16896 | PLEKHG7   | 6.914770958 | -0.150619353 | 0.323119 | -0.466142 | 0.641114 | 0.743754 |
| 15426 | C16orf7   | 428.8624249 | -0.150866455 | 0.171023 | -0.882139 | 0.377701 | 0.479925 |
| 14207 | GPCPD1    | 864.0670954 | -0.151134277 | 0.120475 | -1.254484 | 0.209666 | 0.28927  |
| 14484 | IGBP1     | 2094.038203 | -0.151459596 | 0.129112 | -1.173085 | 0.240762 | 0.32582  |
| 16034 | PLAT      | 900.8429423 | -0.151494686 | 0.215788 | -0.702055 | 0.482645 | 0.590016 |
| 13018 | STK38     | 1009.047557 | -0.15151464  | 0.092478 | -1.638384 | 0.101342 | 0.152589 |
| 16088 | SDHAP1    | 250.9431602 | -0.151616995 | 0.221214 | -0.685386 | 0.4931   | 0.600774 |
| 17598 | DCAF12L1  | 69.73476868 | -0.151638339 | 0.516104 | -0.293813 | 0.7689   | 0.856416 |
| 11136 | NONO      | 5403.06051  | -0.151798077 | 0.067738 | -2.240974 | 0.025028 | 0.044053 |
| 17547 | MEPE      | 1.113025349 | -0.151887206 | 0.501857 | -0.30265  | 0.762156 | 0.851372 |
| 14859 | AIDA      | 1530.471154 | -0.151922986 | 0.144662 | -1.050194 | 0.293629 | 0.387336 |
| 15308 | STXBP5    | 285.4037949 | -0.15207501  | 0.165445 | -0.919187 | 0.357998 | 0.458395 |
| 12701 | DNAJC7    | 1630.464149 | -0.152131028 | 0.087744 | -1.733812 | 0.082951 | 0.128016 |
| 13159 | PSME1     | 3740.267912 | -0.152259778 | 0.09564  | -1.592012 | 0.111382 | 0.16592  |

|       |          |             |              |          |           |          |          |
|-------|----------|-------------|--------------|----------|-----------|----------|----------|
| 13222 | ADSL     | 1017.206528 | -0.152299445 | 0.096799 | -1.573359 | 0.115636 | 0.171425 |
| 16959 | PTPRVP   | 1.502344183 | -0.152400534 | 0.33893  | -0.449652 | 0.652962 | 0.754655 |
| 15705 | LPAR6    | 1149.1449   | -0.152725519 | 0.190024 | -0.803715 | 0.421562 | 0.52614  |
| 12812 | C1orf131 | 180.9550767 | -0.153033567 | 0.089953 | -1.701253 | 0.088896 | 0.136001 |
| 13722 | HAX1     | 1664.421884 | -0.153176264 | 0.108586 | -1.410639 | 0.158351 | 0.226194 |
| 16683 | ANP32C   | 1.670500832 | -0.153279859 | 0.293182 | -0.522816 | 0.601103 | 0.706241 |
| 15098 | C6orf145 | 1296.814521 | -0.153322222 | 0.156976 | -0.976725 | 0.328706 | 0.426727 |
| 13175 | RSL1D1   | 3810.098569 | -0.153437873 | 0.096603 | -1.58834  | 0.112209 | 0.166939 |
| 12912 | PDE6D    | 360.6947382 | -0.153986248 | 0.092247 | -1.669288 | 0.09506  | 0.144306 |
| 10804 | FTSJ2    | 628.9335747 | -0.154064552 | 0.065277 | -2.360184 | 0.018266 | 0.033139 |
| 15471 | C7orf55  | 288.3474568 | -0.154107633 | 0.177331 | -0.869037 | 0.384827 | 0.487548 |
| 17426 | TAS2R3   | 0.652990638 | -0.154140646 | 0.462882 | -0.333002 | 0.739133 | 0.831386 |
| 14213 | NANOS1   | 120.951464  | -0.154404844 | 0.123172 | -1.253572 | 0.209998 | 0.289626 |
| 14448 | C1orf151 | 1155.092466 | -0.154453288 | 0.130575 | -1.182872 | 0.23686  | 0.321338 |
| 15959 | MAP3K14  | 1018.500691 | -0.154471288 | 0.21316  | -0.724673 | 0.468653 | 0.575568 |
| 16242 | EGFR     | 2949.124442 | -0.154535043 | 0.240304 | -0.643083 | 0.52017  | 0.627747 |
| 16803 | MGC27382 | 2.661340927 | -0.154551742 | 0.316044 | -0.48902  | 0.624827 | 0.728872 |
| 13714 | RARS     | 1438.993828 | -0.154596837 | 0.109305 | -1.414363 | 0.157255 | 0.22476  |
| 17164 | HCG22    | 1.826923229 | -0.154763179 | 0.391762 | -0.395044 | 0.692811 | 0.791178 |
| 16018 | GSTM2    | 848.6220878 | -0.154786234 | 0.219155 | -0.706287 | 0.48001  | 0.587403 |
| 15488 | COX5B    | 2996.489168 | -0.154813686 | 0.178901 | -0.865358 | 0.386843 | 0.489573 |
| 16728 | TPH1     | 3.611946124 | -0.154855554 | 0.301945 | -0.512861 | 0.608049 | 0.71248  |
| 16548 | POU3F1   | 9.278135744 | -0.154979476 | 0.277206 | -0.559077 | 0.576109 | 0.682398 |
| 13257 | RBM28    | 363.0359133 | -0.155130588 | 0.099341 | -1.561599 | 0.118382 | 0.175033 |
| 15178 | GLTPD1   | 641.4798434 | -0.155243779 | 0.162813 | -0.953513 | 0.34033  | 0.439506 |
| 12192 | ANKRD11  | 2294.717387 | -0.155254207 | 0.08175  | -1.899123 | 0.057548 | 0.09252  |
| 16494 | CPLX1    | 82.67403205 | -0.155276216 | 0.270387 | -0.574274 | 0.565783 | 0.672345 |
| 15703 | ENG      | 7841.835568 | -0.155416732 | 0.193037 | -0.805115 | 0.420754 | 0.525198 |
| 17934 | SNORD22  | 0.502063254 | -0.15550535  | 0.703442 | -0.221063 | 0.825043 | 0.901732 |
| 14889 | TIMM10   | 515.7326827 | -0.155748206 | 0.149768 | -1.039927 | 0.298374 | 0.392802 |
| 14293 | REPIN1   | 1885.539474 | -0.155955015 | 0.12664  | -1.231486 | 0.218141 | 0.299153 |
| 14441 | PHRF1    | 1060.379661 | -0.156161714 | 0.131823 | -1.184636 | 0.236161 | 0.320546 |
| 17228 | COX6A2   | 5.99917794  | -0.1562868   | 0.409201 | -0.381931 | 0.702512 | 0.799277 |
| 12114 | FBXO42   | 490.1988985 | -0.156292899 | 0.08125  | -1.923616 | 0.054403 | 0.088026 |
| 12840 | EIF4H    | 5562.35612  | -0.156295017 | 0.092316 | -1.693045 | 0.090447 | 0.138073 |
| 14937 | HLA-C    | 33260.11617 | -0.156489885 | 0.15278  | -1.02428  | 0.305703 | 0.401055 |
| 13304 | UBFD1    | 1457.155683 | -0.156599498 | 0.101572 | -1.541763 | 0.123131 | 0.181411 |
| 14461 | HN1L     | 3260.853397 | -0.15670075  | 0.132883 | -1.179243 | 0.238302 | 0.323003 |
| 15729 | DNM1P35  | 31.41242043 | -0.156701253 | 0.197006 | -0.795414 | 0.426373 | 0.531333 |
| 13483 | PRIM2    | 117.7138235 | -0.15673246  | 0.104964 | -1.493204 | 0.135384 | 0.196815 |
| 11935 | VPS25    | 921.0589752 | -0.156770757 | 0.079226 | -1.978777 | 0.047841 | 0.078563 |
| 14528 | MGAT4B   | 2869.019289 | -0.156892953 | 0.135622 | -1.156836 | 0.247339 | 0.333707 |
| 14411 | POP1     | 178.0644605 | -0.156952209 | 0.131404 | -1.194422 | 0.232313 | 0.315978 |
| 14712 | ARMC9    | 218.5643566 | -0.156995869 | 0.143469 | -1.094286 | 0.27383  | 0.364827 |
| 16591 | HAVCR2   | 1828.864926 | -0.157065162 | 0.285407 | -0.550321 | 0.5821   | 0.687706 |
| 17848 | RAET1L   | 0.516772583 | -0.157190661 | 0.665835 | -0.236081 | 0.81337  | 0.893272 |
| 16004 | PDXDC2   | 253.8607988 | -0.157357182 | 0.221021 | -0.711955 | 0.476493 | 0.583588 |

|       |           |             |              |          |           |          |          |
|-------|-----------|-------------|--------------|----------|-----------|----------|----------|
| 12764 | EXOC7     | 3187.052883 | -0.158003206 | 0.092136 | -1.714891 | 0.086365 | 0.132626 |
| 17402 | GDAP1L1   | 2.989393021 | -0.158062383 | 0.46403  | -0.340629 | 0.733383 | 0.826056 |
| 16880 | CACNA2D   | 197.4629437 | -0.158097942 | 0.336336 | -0.47006  | 0.638312 | 0.741206 |
| 14917 | SURF2     | 210.9226961 | -0.158160882 | 0.153306 | -1.031667 | 0.302228 | 0.397144 |
| 15603 | FKBP14    | 199.4356807 | -0.158168894 | 0.18963  | -0.834092 | 0.404229 | 0.507806 |
| 13724 | MRP63     | 804.2088291 | -0.158351281 | 0.112306 | -1.409995 | 0.158541 | 0.226433 |
| 13589 | E2F3      | 426.0828101 | -0.158428063 | 0.10866  | -1.458021 | 0.144835 | 0.208912 |
| 14474 | GMDS      | 196.8134264 | -0.158500979 | 0.134795 | -1.175868 | 0.239648 | 0.324536 |
| 13997 | CCDC41    | 177.0002741 | -0.158636647 | 0.120297 | -1.318711 | 0.187266 | 0.262242 |
| 17174 | GPX2      | 8.788780108 | -0.158673601 | 0.40342  | -0.393321 | 0.694082 | 0.792169 |
| 15809 | FLJ45244  | 57.87947417 | -0.159119395 | 0.205686 | -0.773603 | 0.439165 | 0.544505 |
| 14119 | CLTA      | 2707.963378 | -0.159219521 | 0.124235 | -1.2816   | 0.199983 | 0.277631 |
| 16495 | SGIP1     | 185.766662  | -0.159638315 | 0.277998 | -0.574242 | 0.565804 | 0.672345 |
| 14146 | C19orf29  | 370.6011389 | -0.159700664 | 0.125525 | -1.27226  | 0.203281 | 0.28167  |
| 16789 | RASAL1    | 301.0282791 | -0.159709464 | 0.324353 | -0.492394 | 0.622441 | 0.726694 |
| 12715 | CWF19L1   | 429.70165   | -0.159729916 | 0.092445 | -1.727844 | 0.084016 | 0.129517 |
| 11624 | GPKOW     | 434.6489535 | -0.159744436 | 0.077136 | -2.070937 | 0.038365 | 0.064693 |
| 17833 | C17orf74  | 0.536429521 | -0.159930897 | 0.66827  | -0.239321 | 0.810857 | 0.891247 |
| 12792 | GGA3      | 637.5464414 | -0.159933086 | 0.093706 | -1.706749 | 0.087869 | 0.13464  |
| 11912 | DDX23     | 2056.806388 | -0.1600086   | 0.080623 | -1.984664 | 0.047182 | 0.077637 |
| 17237 | FAM135B   | 43.48635776 | -0.16002791  | 0.421551 | -0.379617 | 0.70423  | 0.800812 |
| 15566 | VEGFC     | 283.3434868 | -0.160070714 | 0.189758 | -0.843554 | 0.398919 | 0.502326 |
| 16735 | NTRK3     | 42.28310287 | -0.160073747 | 0.314007 | -0.509778 | 0.610207 | 0.714728 |
| 14037 | C2orf76   | 65.58262198 | -0.160095013 | 0.122445 | -1.307489 | 0.191047 | 0.266774 |
| 16894 | KLHL14    | 34.79398564 | -0.160151737 | 0.343049 | -0.466848 | 0.640608 | 0.743256 |
| 14086 | C17orf65  | 120.9406132 | -0.160163342 | 0.123925 | -1.292421 | 0.196211 | 0.273033 |
| 13901 | FNBP4     | 1066.441968 | -0.160286591 | 0.118865 | -1.348481 | 0.177504 | 0.250288 |
| 15936 | PRKCA     | 1186.47956  | -0.160628836 | 0.219663 | -0.731252 | 0.464625 | 0.571481 |
| 15757 | LOC646999 | 13.12431319 | -0.160743264 | 0.204094 | -0.787594 | 0.430934 | 0.536063 |
| 17392 | TTLL2     | 6.761446538 | -0.160823042 | 0.468555 | -0.343232 | 0.731424 | 0.824324 |
| 15355 | ALX3      | 18.62485921 | -0.160966393 | 0.178178 | -0.903401 | 0.366313 | 0.467572 |
| 11594 | SAFB      | 1451.980766 | -0.161028322 | 0.077321 | -2.082607 | 0.037287 | 0.063038 |
| 13863 | CYTH3     | 747.3286393 | -0.161135018 | 0.118124 | -1.36412  | 0.17253  | 0.243941 |
| 15206 | PRDXDD1I  | 47.5889439  | -0.161229626 | 0.170473 | -0.945777 | 0.344262 | 0.443765 |
| 15378 | RPS10P7   | 28.09944764 | -0.161436055 | 0.18043  | -0.89473  | 0.370931 | 0.472794 |
| 14031 | PEX14     | 384.4226761 | -0.161482197 | 0.123252 | -1.310184 | 0.190134 | 0.265613 |
| 14569 | ASAP1     | 1445.931771 | -0.161506322 | 0.140946 | -1.14587  | 0.251849 | 0.338835 |
| 15076 | MYO1B     | 2850.964304 | -0.161606752 | 0.164152 | -0.984492 | 0.324874 | 0.422383 |
| 17466 | C14orf178 | 0.469846426 | -0.161654468 | 0.500424 | -0.323035 | 0.746669 | 0.83794  |
| 13099 | STRN4     | 1461.987831 | -0.161894174 | 0.100441 | -1.61184  | 0.106997 | 0.160107 |
| 14756 | ACACA     | 831.4489159 | -0.162110646 | 0.149825 | -1.081999 | 0.279253 | 0.370932 |
| 15520 | ITM2C     | 2630.520689 | -0.162140749 | 0.190144 | -0.852728 | 0.39381  | 0.497363 |
| 15479 | POPDC2    | 135.5530639 | -0.162242664 | 0.187107 | -0.867114 | 0.38588  | 0.488638 |
| 11800 | EIF1AD    | 504.8517652 | -0.162286773 | 0.080317 | -2.02058  | 0.043323 | 0.071964 |
| 14590 | SLC4A2    | 2680.743085 | -0.16229123  | 0.142426 | -1.139479 | 0.254503 | 0.341914 |
| 15331 | ASPH      | 5524.077428 | -0.162351144 | 0.178343 | -0.91033  | 0.362649 | 0.463624 |
| 14685 | CERK      | 1063.88277  | -0.162366308 | 0.146979 | -1.104688 | 0.269295 | 0.359445 |

|       |           |             |              |          |           |          |          |
|-------|-----------|-------------|--------------|----------|-----------|----------|----------|
| 13354 | CLK3      | 846.5289139 | -0.162398309 | 0.10626  | -1.528317 | 0.126434 | 0.18558  |
| 15615 | FAM162A   | 2013.601825 | -0.162466738 | 0.195301 | -0.831877 | 0.405479 | 0.508984 |
| 12620 | CYFIP1    | 2979.414039 | -0.162562561 | 0.092037 | -1.76627  | 0.07735  | 0.120129 |
| 16113 | PIGZ      | 64.75209683 | -0.162635106 | 0.240331 | -0.676713 | 0.498588 | 0.606518 |
| 12534 | E2F4      | 1109.525079 | -0.162883366 | 0.090758 | -1.794698 | 0.072702 | 0.113693 |
| 13258 | SUMO2     | 3108.186583 | -0.162899605 | 0.104338 | -1.561273 | 0.118459 | 0.175134 |
| 14778 | C14orf156 | 521.5951568 | -0.163018506 | 0.151682 | -1.07474  | 0.282491 | 0.374661 |
| 16539 | COL4A5    | 205.0734472 | -0.163481115 | 0.290605 | -0.562554 | 0.573739 | 0.679919 |
| 14038 | PGM1      | 2990.608016 | -0.163658648 | 0.125185 | -1.307338 | 0.191098 | 0.266826 |
| 16507 | FIGF      | 11.04121407 | -0.164021083 | 0.287809 | -0.569895 | 0.568749 | 0.675352 |
| 12975 | C1orf52   | 278.6486058 | -0.164045216 | 0.09935  | -1.651185 | 0.098701 | 0.149105 |
| 16980 | SERPINA10 | 2.01900439  | -0.164056114 | 0.369043 | -0.444544 | 0.656649 | 0.758271 |
| 12506 | RAE1      | 484.0027032 | -0.164103041 | 0.091105 | -1.801248 | 0.071664 | 0.112321 |
| 14848 | C5orf13   | 2388.874197 | -0.164193663 | 0.156021 | -1.052381 | 0.292625 | 0.386297 |
| 15747 | ERN1      | 177.7476372 | -0.164204042 | 0.207617 | -0.7909   | 0.429003 | 0.533999 |
| 17932 | CEACAM8   | 0.426125826 | -0.164222652 | 0.738209 | -0.222461 | 0.823955 | 0.900644 |
| 14627 | LOC90784  | 237.4523544 | -0.164237635 | 0.146003 | -1.124896 | 0.260633 | 0.349263 |
| 14903 | CREB3L4   | 293.6282808 | -0.16424538  | 0.158697 | -1.034962 | 0.300687 | 0.395475 |
| 16642 | SNCAIP    | 40.25952623 | -0.164557355 | 0.306211 | -0.537399 | 0.590992 | 0.696072 |
| 14389 | TBCD      | 1304.821253 | -0.164566315 | 0.136969 | -1.201489 | 0.229562 | 0.312714 |
| 16107 | PCDH18    | 363.2034448 | -0.164583301 | 0.242617 | -0.678368 | 0.497538 | 0.605466 |
| 15132 | LUC7L     | 642.9071019 | -0.16470824  | 0.170814 | -0.964257 | 0.334917 | 0.433829 |
| 10522 | RNF34     | 514.3788174 | -0.16471274  | 0.066872 | -2.463114 | 0.013774 | 0.025658 |
| 12015 | NTAN1     | 666.556375  | -0.164807672 | 0.084236 | -1.95651  | 0.050405 | 0.08223  |
| 16381 | MGC16121  | 49.19985562 | -0.164985851 | 0.272664 | -0.605089 | 0.54512  | 0.652274 |
| 13649 | CTDP1     | 459.0335592 | -0.165144536 | 0.114794 | -1.438613 | 0.15026  | 0.215785 |
| 12796 | PAF1      | 1358.187153 | -0.165259663 | 0.09693  | -1.704935 | 0.088207 | 0.135115 |
| 14617 | SLC31A2   | 626.2613342 | -0.165368718 | 0.146671 | -1.127477 | 0.259541 | 0.348055 |
| 12674 | ANXA11    | 3863.009772 | -0.165487547 | 0.094784 | -1.745944 | 0.080821 | 0.124994 |
| 17746 | ZFY       | 193.9657637 | -0.165736579 | 0.645753 | -0.256656 | 0.797444 | 0.880801 |
| 16812 | GDPD2     | 2.911115332 | -0.165753835 | 0.340022 | -0.487479 | 0.625919 | 0.729711 |
| 15159 | DHRS3     | 2905.658067 | -0.165848783 | 0.173113 | -0.95804  | 0.338043 | 0.437098 |
| 14735 | GAS2L1    | 623.8658338 | -0.166046278 | 0.152542 | -1.088526 | 0.276363 | 0.367603 |
| 17663 | GSG1L     | 0.371929753 | -0.166075671 | 0.600321 | -0.276645 | 0.782053 | 0.867861 |
| 17750 | OR13J1    | 0.373096654 | -0.166075699 | 0.648168 | -0.256223 | 0.797778 | 0.880926 |
| 17931 | LOC152024 | 0.272684063 | -0.166075844 | 0.746234 | -0.222552 | 0.823884 | 0.900616 |
| 17892 | LIM2      | 0.231619125 | -0.166075854 | 0.724471 | -0.229238 | 0.818684 | 0.896833 |
| 18068 | C3orf16   | 0.249478459 | -0.166075978 | 0.860571 | -0.192983 | 0.846972 | 0.918834 |
| 18136 | NHLH2     | 0.313581021 | -0.166075989 | 0.93625  | -0.177384 | 0.859207 | 0.928612 |
| 18158 | OR9Q1     | 0.22884356  | -0.166076122 | 0.960663 | -0.172877 | 0.862748 | 0.931345 |
| 18133 | HIST1H4A  | 0.199151621 | -0.166076137 | 0.933143 | -0.177975 | 0.858743 | 0.928276 |
| 18138 | TAS2R42   | 0.200687412 | -0.166076146 | 0.939902 | -0.176695 | 0.859748 | 0.929095 |
| 18129 | DNAI2     | 0.172979412 | -0.166076161 | 0.932141 | -0.178166 | 0.858592 | 0.928204 |
| 18190 | SYCP3     | 0.232262084 | -0.166076188 | 1.010575 | -0.164338 | 0.869465 | 0.936909 |
| 18180 | CD200R1L  | 0.177583289 | -0.166076245 | 0.990122 | -0.167733 | 0.866793 | 0.934544 |
| 18178 | PIWIL3    | 0.155834935 | -0.166076272 | 0.989371 | -0.167861 | 0.866693 | 0.934514 |
| 18232 | DC1001330 | 0.193774856 | -0.166076321 | 1.059448 | -0.156757 | 0.875436 | 0.941374 |

|       |            |             |              |          |           |          |          |
|-------|------------|-------------|--------------|----------|-----------|----------|----------|
| 18378 | MYBPC1     | 0.323792755 | -0.166076375 | 1.252753 | -0.132569 | 0.894534 | 0.954011 |
| 18285 | LOC392196  | 0.135221749 | -0.166076553 | 1.13517  | -0.146301 | 0.883684 | 0.947284 |
| 18433 | LUZP4      | 0.298462404 | -0.166076562 | 1.346104 | -0.123376 | 0.90181  | 0.95897  |
| 18341 | BCAR4      | 0.156773721 | -0.166076671 | 1.218577 | -0.136287 | 0.891594 | 0.952033 |
| 18354 | RXFP2      | 0.137955668 | -0.166076715 | 1.219228 | -0.136215 | 0.891652 | 0.952033 |
| 18460 | C14orf166E | 0.14855339  | -0.166077148 | 1.420344 | -0.116927 | 0.906918 | 0.962737 |
| 18475 | MRGPRD     | 0.135519427 | -0.166077172 | 1.430319 | -0.116112 | 0.907564 | 0.962877 |
| 18611 | OR11H4     | 0.116173703 | -0.166078038 | 1.732201 | -0.095877 | 0.923618 | 0.97275  |
| 18616 | 44166      | 0.102986517 | -0.166078159 | 1.743718 | -0.095244 | 0.924121 | 0.973018 |
| 18697 | SPDYC      | 0.077159322 | -0.166079091 | 1.993936 | -0.083292 | 0.933619 | 0.979957 |
| 18676 | CYCSP52    | 0.077106275 | -0.166079092 | 1.994108 | -0.083285 | 0.933625 | 0.979957 |
| 18726 | NAA11      | 0.114908036 | -0.16607941  | 2.150419 | -0.077231 | 0.93844  | 0.981752 |
| 18750 | CYP4F8     | 0.099203091 | -0.166079642 | 2.176386 | -0.07631  | 0.939173 | 0.981934 |
| 18747 | BTBD17     | 0.096980422 | -0.166079658 | 2.18063  | -0.076161 | 0.939291 | 0.981934 |
| 18748 | CELP       | 0.096758059 | -0.16607968  | 2.186471 | -0.075958 | 0.939453 | 0.981934 |
| 18754 | H2BFM      | 0.093808736 | -0.166079704 | 2.192645 | -0.075744 | 0.939623 | 0.982052 |
| 18767 | SERPINB11  | 0.078700834 | -0.166080007 | 2.233714 | -0.074352 | 0.940731 | 0.982489 |
| 18770 | WNT8A      | 0.078022576 | -0.166080017 | 2.236363 | -0.074263 | 0.940801 | 0.982489 |
| 18769 | SSX7       | 0.077855097 | -0.16608002  | 2.237021 | -0.074242 | 0.940818 | 0.982489 |
| 18765 | OC90       | 0.077799663 | -0.166080021 | 2.237239 | -0.074234 | 0.940824 | 0.982489 |
| 18766 | SCARNA1    | 0.077381927 | -0.166080027 | 2.238891 | -0.07418  | 0.940867 | 0.982489 |
| 18764 | C6orf126   | 0.077349349 | -0.166080028 | 2.23902  | -0.074175 | 0.940871 | 0.982489 |
| 18816 | KRTAP13-2  | 0.100251345 | -0.166080806 | 2.463492 | -0.067417 | 0.94625  | 0.985725 |
| 18817 | METTLL11E  | 0.098774098 | -0.166080815 | 2.465685 | -0.067357 | 0.946298 | 0.985725 |
| 18819 | HCRTR2     | 0.099153428 | -0.166080838 | 2.470846 | -0.067216 | 0.94641  | 0.985771 |
| 18936 | SLC6A5     | 0.080900648 | -0.166081285 | 2.530913 | -0.065621 | 0.947679 | 0.986718 |
| 18859 | GPR32      | 0.077005521 | -0.166081372 | 2.549907 | -0.065132 | 0.948069 | 0.986718 |
| 18832 | BTF3L1     | 0.058161851 | -0.166082054 | 2.651799 | -0.06263  | 0.950061 | 0.986718 |
| 18895 | ODF1       | 0.058159229 | -0.166082054 | 2.651818 | -0.062629 | 0.950062 | 0.986718 |
| 18834 | C14orf183  | 0.057175743 | -0.166082089 | 2.658968 | -0.062461 | 0.950196 | 0.986718 |
| 18882 | LOC285692  | 0.057052084 | -0.166082094 | 2.659878 | -0.06244  | 0.950213 | 0.986718 |
| 18845 | CXorf49B   | 0.056583003 | -0.166082111 | 2.663353 | -0.062358 | 0.950278 | 0.986718 |
| 18822 | ACTL9      | 0.056472165 | -0.166082115 | 2.66418  | -0.062339 | 0.950293 | 0.986718 |
| 18907 | OR6A2      | 0.056428661 | -0.166082117 | 2.664505 | -0.062331 | 0.950299 | 0.986718 |
| 18946 | TAS2R8     | 0.056405896 | -0.166082118 | 2.664675 | -0.062327 | 0.950302 | 0.986718 |
| 18870 | KPRP       | 0.116902525 | -0.166082167 | 2.761402 | -0.060144 | 0.952041 | 0.986718 |
| 18875 | LBX1       | 0.097711984 | -0.166082551 | 2.839942 | -0.058481 | 0.953366 | 0.986718 |
| 18913 | OTUD6A     | 0.076834467 | -0.166083169 | 2.91407  | -0.056994 | 0.95455  | 0.986718 |
| 18933 | SIX6       | 0.079849212 | -0.166083169 | 2.91407  | -0.056994 | 0.95455  | 0.986718 |
| 18940 | SNORA46    | 0.080294169 | -0.166083169 | 2.91407  | -0.056994 | 0.95455  | 0.986718 |
| 18896 | OR10J3     | 0.075151695 | -0.166083169 | 2.91407  | -0.056994 | 0.95455  | 0.986718 |
| 18823 | ADAM30     | 0.055307696 | -0.166083414 | 2.91407  | -0.056994 | 0.95455  | 0.986718 |
| 18830 | BIRC8      | 0.059814823 | -0.166083414 | 2.91407  | -0.056994 | 0.95455  | 0.986718 |
| 18838 | CELA2A     | 0.059350968 | -0.166083414 | 2.91407  | -0.056994 | 0.95455  | 0.986718 |
| 18850 | DPPA5      | 0.054803385 | -0.166083414 | 2.91407  | -0.056994 | 0.95455  | 0.986718 |
| 18853 | FAM25B     | 0.061064655 | -0.166083414 | 2.91407  | -0.056994 | 0.95455  | 0.986718 |
| 18872 | KRT74      | 0.054661943 | -0.166083414 | 2.91407  | -0.056994 | 0.95455  | 0.986718 |

|       |           |             |              |          |           |          |          |
|-------|-----------|-------------|--------------|----------|-----------|----------|----------|
| 18881 | LOC28537C | 0.05480658  | -0.166083414 | 2.91407  | -0.056994 | 0.95455  | 0.986718 |
| 18904 | OR52E6    | 0.057134904 | -0.166083414 | 2.91407  | -0.056994 | 0.95455  | 0.986718 |
| 18921 | PRDM13    | 0.05926613  | -0.166083414 | 2.91407  | -0.056994 | 0.95455  | 0.986718 |
| 18938 | SNORA27   | 0.056713559 | -0.166083414 | 2.91407  | -0.056994 | 0.95455  | 0.986718 |
| 18955 | UBE2DNL   | 0.056725477 | -0.166083414 | 2.91407  | -0.056994 | 0.95455  | 0.986718 |
| 18958 | WFDC8     | 0.058274744 | -0.166083414 | 2.91407  | -0.056994 | 0.95455  | 0.986718 |
| 18892 | NCR2      | 0.056436099 | -0.166083414 | 2.91407  | -0.056994 | 0.95455  | 0.986718 |
| 18893 | NDST4     | 0.056068868 | -0.166083414 | 2.91407  | -0.056994 | 0.95455  | 0.986718 |
| 18894 | NXF4      | 0.056111345 | -0.166083414 | 2.91407  | -0.056994 | 0.95455  | 0.986718 |
| 18909 | OR7E156P  | 0.05686431  | -0.166083414 | 2.91407  | -0.056994 | 0.95455  | 0.986718 |
| 18947 | TAS2R9    | 0.058387757 | -0.166083414 | 2.91407  | -0.056994 | 0.95455  | 0.986718 |
| 18878 | OC1001299 | 0.038530656 | -0.166083659 | 2.91407  | -0.056994 | 0.95455  | 0.986718 |
| 18864 | IL1F10    | 0.038192494 | -0.166083659 | 2.91407  | -0.056994 | 0.95455  | 0.986718 |
| 18826 | ALG1L2    | 0.038433304 | -0.166083659 | 2.91407  | -0.056994 | 0.95455  | 0.986718 |
| 18840 | CIB3      | 0.037386878 | -0.166083659 | 2.91407  | -0.056994 | 0.95455  | 0.986718 |
| 18842 | CRYGD     | 0.038328329 | -0.166083659 | 2.91407  | -0.056994 | 0.95455  | 0.986718 |
| 18855 | FAM75A6   | 0.036412016 | -0.166083659 | 2.91407  | -0.056994 | 0.95455  | 0.986718 |
| 18858 | GPR148    | 0.039108749 | -0.166083659 | 2.91407  | -0.056994 | 0.95455  | 0.986718 |
| 18860 | HIST1H3I  | 0.037312786 | -0.166083659 | 2.91407  | -0.056994 | 0.95455  | 0.986718 |
| 18862 | HTR3D     | 0.037040066 | -0.166083659 | 2.91407  | -0.056994 | 0.95455  | 0.986718 |
| 18863 | IL17A     | 0.037752574 | -0.166083659 | 2.91407  | -0.056994 | 0.95455  | 0.986718 |
| 18866 | INSL4     | 0.038215543 | -0.166083659 | 2.91407  | -0.056994 | 0.95455  | 0.986718 |
| 18871 | KRT26     | 0.0377598   | -0.166083659 | 2.91407  | -0.056994 | 0.95455  | 0.986718 |
| 18879 | LOC255025 | 0.037877616 | -0.166083659 | 2.91407  | -0.056994 | 0.95455  | 0.986718 |
| 18883 | LOC285735 | 0.036300384 | -0.166083659 | 2.91407  | -0.056994 | 0.95455  | 0.986718 |
| 18887 | MAGEB16   | 0.04004281  | -0.166083659 | 2.91407  | -0.056994 | 0.95455  | 0.986718 |
| 18901 | OR2AK2    | 0.052350927 | -0.166083659 | 2.91407  | -0.056994 | 0.95455  | 0.986718 |
| 18905 | OR5AU1    | 0.036225268 | -0.166083659 | 2.91407  | -0.056994 | 0.95455  | 0.986718 |
| 18908 | OR6C75    | 0.03508121  | -0.166083659 | 2.91407  | -0.056994 | 0.95455  | 0.986718 |
| 18911 | OTOP1     | 0.037099931 | -0.166083659 | 2.91407  | -0.056994 | 0.95455  | 0.986718 |
| 18917 | PLAC1L    | 0.036242375 | -0.166083659 | 2.91407  | -0.056994 | 0.95455  | 0.986718 |
| 18928 | SCGB1A1   | 0.040539474 | -0.166083659 | 2.91407  | -0.056994 | 0.95455  | 0.986718 |
| 18934 | SLC17A6   | 0.035937317 | -0.166083659 | 2.91407  | -0.056994 | 0.95455  | 0.986718 |
| 18937 | SNORA26   | 0.039957865 | -0.166083659 | 2.91407  | -0.056994 | 0.95455  | 0.986718 |
| 18941 | SNORA71E  | 0.03957903  | -0.166083659 | 2.91407  | -0.056994 | 0.95455  | 0.986718 |
| 18942 | SPANXC    | 0.037416355 | -0.166083659 | 2.91407  | -0.056994 | 0.95455  | 0.986718 |
| 18945 | TAS2R7    | 0.041261944 | -0.166083659 | 2.91407  | -0.056994 | 0.95455  | 0.986718 |
| 18952 | TPH2      | 0.036793251 | -0.166083659 | 2.91407  | -0.056994 | 0.95455  | 0.986718 |
| 18959 | XAGE2     | 0.039016469 | -0.166083659 | 2.91407  | -0.056994 | 0.95455  | 0.986718 |
| 18961 | ZNF679    | 0.037608765 | -0.166083659 | 2.91407  | -0.056994 | 0.95455  | 0.986718 |
| 18903 | OR4D1     | 0.037171714 | -0.166083659 | 2.91407  | -0.056994 | 0.95455  | 0.986718 |
| 13156 | PYCR2     | 1237.199644 | -0.166324445 | 0.104451 | -1.592375 | 0.1113   | 0.165826 |
| 12806 | FTSJ3     | 981.7984111 | -0.166454297 | 0.097785 | -1.702247 | 0.088709 | 0.135779 |
| 14572 | ARHGAP1C  | 389.8054608 | -0.166562815 | 0.145456 | -1.145107 | 0.252165 | 0.339185 |
| 15530 | CITED2    | 2429.696261 | -0.167094682 | 0.196245 | -0.851458 | 0.394515 | 0.497932 |
| 16155 | LRP4      | 317.051727  | -0.167334734 | 0.251841 | -0.664445 | 0.506405 | 0.614388 |
| 13834 | POLR3K    | 219.7677214 | -0.167524868 | 0.121993 | -1.373239 | 0.169678 | 0.240412 |



|       |           |             |              |          |           |          |          |
|-------|-----------|-------------|--------------|----------|-----------|----------|----------|
| 15905 | ANKRD37   | 355.1541763 | -0.167527821 | 0.226123 | -0.740872 | 0.458771 | 0.565309 |
| 14671 | LOC144571 | 58.9079241  | -0.167539055 | 0.150867 | -1.110506 | 0.266781 | 0.356429 |
| 16730 | HR        | 22.75811345 | -0.167696519 | 0.327876 | -0.511463 | 0.609027 | 0.71354  |
| 14967 | NDUFB2    | 1704.463924 | -0.167776299 | 0.164952 | -1.017121 | 0.309096 | 0.404797 |
| 12996 | SETD1A    | 725.7688799 | -0.168003942 | 0.102058 | -1.646156 | 0.099732 | 0.150419 |
| 14169 | CTDSP1    | 3974.707897 | -0.168563028 | 0.133181 | -1.265665 | 0.205633 | 0.284467 |
| 13329 | SUFU      | 741.9362101 | -0.168587716 | 0.10991  | -1.533875 | 0.12506  | 0.183908 |
| 17595 | TMSB4Y    | 19.65654797 | -0.168758582 | 0.572686 | -0.294679 | 0.768239 | 0.855826 |
| 13350 | SCMH1     | 1287.679039 | -0.168782262 | 0.110395 | -1.528901 | 0.126289 | 0.185423 |
| 14419 | KIAA1841  | 147.4265742 | -0.168900061 | 0.141658 | -1.192311 | 0.233139 | 0.316927 |
| 11705 | C2orf68   | 792.4538102 | -0.168919685 | 0.082382 | -2.050455 | 0.04032  | 0.067519 |
| 15527 | KIAA0114  | 325.560832  | -0.16893577  | 0.198308 | -0.851885 | 0.394278 | 0.497729 |
| 16030 | FBXO16    | 40.79451709 | -0.16894625  | 0.240508 | -0.702455 | 0.482395 | 0.589859 |
| 15768 | SH2D3A    | 111.2014163 | -0.169155727 | 0.215363 | -0.785443 | 0.432194 | 0.537254 |
| 13478 | PACS1     | 2337.439219 | -0.1692195   | 0.113179 | -1.495153 | 0.134875 | 0.196147 |
| 13594 | IP6K2     | 1017.661099 | -0.169330292 | 0.116202 | -1.457201 | 0.145061 | 0.209161 |
| 14740 | UACA      | 3163.958958 | -0.169389257 | 0.155831 | -1.087006 | 0.277034 | 0.368395 |
| 14223 | SAT2      | 887.393189  | -0.169535302 | 0.135505 | -1.25114  | 0.210883 | 0.290638 |
| 15522 | DAGLA     | 154.1688918 | -0.169601924 | 0.198953 | -0.852472 | 0.393952 | 0.497478 |
| 14686 | GPR146    | 279.4537482 | -0.169703228 | 0.153634 | -1.104591 | 0.269337 | 0.359476 |
| 13964 | LLGL1     | 471.4021435 | -0.169710199 | 0.12756  | -1.33043  | 0.183377 | 0.257403 |
| 13537 | C21orf59  | 674.3854272 | -0.169850273 | 0.115211 | -1.474258 | 0.140412 | 0.203311 |
| 16327 | EPHA1     | 58.85477201 | -0.169872344 | 0.27372  | -0.620607 | 0.534858 | 0.642113 |
| 13170 | FLII      | 2909.842486 | -0.17008825  | 0.107045 | -1.588938 | 0.112074 | 0.166788 |
| 13096 | CCDC59    | 468.2412208 | -0.170111628 | 0.105486 | -1.612649 | 0.106821 | 0.15988  |
| 13202 | LRTOMT    | 200.9963754 | -0.17028992  | 0.107883 | -1.578469 | 0.114458 | 0.169936 |
| 12756 | ASCC1     | 618.1783539 | -0.170318578 | 0.099206 | -1.716814 | 0.086013 | 0.132169 |
| 15354 | THSD1     | 141.1568483 | -0.170348099 | 0.188528 | -0.903569 | 0.366224 | 0.467524 |
| 11744 | TTC9C     | 310.2252631 | -0.17052159  | 0.083662 | -2.038214 | 0.041529 | 0.069312 |
| 13292 | ARMC10    | 915.7544417 | -0.170572475 | 0.110362 | -1.545566 | 0.12221  | 0.180216 |
| 12424 | PFDN1     | 1567.616779 | -0.170602946 | 0.09326  | -1.829327 | 0.067351 | 0.106257 |
| 16558 | GJC3      | 1.589897133 | -0.170605147 | 0.306359 | -0.556879 | 0.57761  | 0.683762 |
| 14073 | COMMD1    | 321.792058  | -0.170667834 | 0.131687 | -1.296012 | 0.194971 | 0.271558 |
| 14331 | TMEM223   | 390.371977  | -0.170722789 | 0.13977  | -1.221455 | 0.221914 | 0.303519 |
| 16324 | SLC29A4   | 940.5432205 | -0.170774245 | 0.274691 | -0.621695 | 0.534143 | 0.64137  |
| 16879 | SLED1     | 6.635480411 | -0.170813143 | 0.363309 | -0.47016  | 0.638241 | 0.741167 |
| 13111 | USP21     | 329.250793  | -0.170903651 | 0.106309 | -1.607616 | 0.107919 | 0.16134  |
| 16249 | RHOBTB3   | 1237.82356  | -0.170912493 | 0.266819 | -0.640555 | 0.521812 | 0.629486 |
| 16020 | SYT2      | 11.19858876 | -0.17103683  | 0.242522 | -0.705242 | 0.48066  | 0.588103 |
| 15816 | TST       | 919.3612855 | -0.171173117 | 0.221892 | -0.771424 | 0.440456 | 0.545863 |
| 14268 | CORO1C    | 4047.199314 | -0.171286717 | 0.138383 | -1.237777 | 0.215799 | 0.296459 |
| 15918 | LMOD3     | 5.102943737 | -0.171314925 | 0.232751 | -0.736043 | 0.461705 | 0.568463 |
| 13434 | LOC643837 | 137.749379  | -0.171342605 | 0.1139   | -1.504322 | 0.132498 | 0.193323 |
| 15563 | DC1001328 | 4.653718526 | -0.171902485 | 0.203616 | -0.844246 | 0.398532 | 0.501935 |
| 14085 | EHD1      | 1941.113422 | -0.171923597 | 0.133017 | -1.292494 | 0.196186 | 0.273017 |
| 14948 | NDUFA13   | 2876.035941 | -0.171947894 | 0.168095 | -1.022922 | 0.306345 | 0.40171  |
| 14821 | CCDC69    | 568.8487812 | -0.172018066 | 0.162526 | -1.058406 | 0.28987  | 0.383358 |

|       |          |             |              |          |           |          |          |
|-------|----------|-------------|--------------|----------|-----------|----------|----------|
| 17412 | FAM153C  | 26.6484135  | -0.172032144 | 0.508146 | -0.338549 | 0.73495  | 0.827346 |
| 12422 | ACBD6    | 432.672718  | -0.172066641 | 0.094055 | -1.829419 | 0.067337 | 0.106253 |
| 15007 | ANO8     | 207.25354   | -0.172687191 | 0.171622 | -1.006204 | 0.314317 | 0.410538 |
| 13391 | RPL22    | 6667.317203 | -0.172860241 | 0.114207 | -1.513576 | 0.130134 | 0.190482 |
| 13790 | EDC4     | 1197.979417 | -0.17295715  | 0.124518 | -1.389009 | 0.16483  | 0.234288 |
| 16306 | SEC31B   | 154.9701173 | -0.173274648 | 0.276724 | -0.626164 | 0.531207 | 0.638551 |
| 15153 | LMF1     | 428.391192  | -0.173333409 | 0.180793 | -0.95874  | 0.33769  | 0.436816 |
| 14481 | ZNF487   | 41.81013978 | -0.173343563 | 0.147717 | -1.173484 | 0.240602 | 0.325671 |
| 12390 | CDK5RAP1 | 405.3925701 | -0.173473908 | 0.094334 | -1.838928 | 0.065926 | 0.104295 |
| 16761 | CRNA0017 | 38.93849224 | -0.173508774 | 0.346784 | -0.500336 | 0.616838 | 0.721356 |
| 15526 | HOXD9    | 417.9235756 | -0.173632614 | 0.203796 | -0.851992 | 0.394218 | 0.497686 |
| 11921 | C16orf88 | 261.6806701 | -0.173744013 | 0.087659 | -1.982043 | 0.047474 | 0.078059 |
| 13884 | TMEM104  | 439.8800705 | -0.173789018 | 0.128434 | -1.353138 | 0.176012 | 0.248488 |
| 12271 | COPS7A   | 1685.279422 | -0.174248692 | 0.09291  | -1.875464 | 0.060729 | 0.097005 |
| 15027 | ATG16L1  | 964.2848974 | -0.174382792 | 0.174742 | -0.997943 | 0.318307 | 0.415195 |
| 13145 | NEDD8    | 1673.633929 | -0.174478302 | 0.109321 | -1.596015 | 0.110485 | 0.164749 |
| 13991 | GBA      | 2119.513926 | -0.17451184  | 0.132139 | -1.32067  | 0.186612 | 0.261438 |
| 17610 | TMEM179  | 2.399809688 | -0.174632734 | 0.598425 | -0.291821 | 0.770424 | 0.857528 |
| 16231 | COX4I2   | 147.2429809 | -0.17467356  | 0.270551 | -0.645622 | 0.518524 | 0.626184 |
| 15414 | KBTD8    | 55.66420155 | -0.174921604 | 0.19769  | -0.88483  | 0.376248 | 0.478451 |
| 12253 | POM121   | 2535.048046 | -0.175196378 | 0.09312  | -1.881394 | 0.059918 | 0.095851 |
| 12607 | TMEM138  | 458.0020978 | -0.175213655 | 0.09904  | -1.769125 | 0.076873 | 0.11952  |
| 13460 | RAD51L3  | 184.7275023 | -0.175283681 | 0.116926 | -1.499095 | 0.133849 | 0.194916 |
| 15165 | PRSS23   | 5037.133194 | -0.175438603 | 0.183284 | -0.957194 | 0.338469 | 0.437477 |
| 12591 | AK2      | 2833.100685 | -0.175753317 | 0.098927 | -1.776592 | 0.075635 | 0.117745 |
| 13908 | MPDU1    | 1477.223812 | -0.175866711 | 0.130481 | -1.347835 | 0.177711 | 0.250454 |
| 13697 | SFT2D2   | 104.8971641 | -0.175880735 | 0.124014 | -1.418237 | 0.156122 | 0.223417 |
| 15215 | MGC23270 | 26.76157759 | -0.176090806 | 0.186565 | -0.94386  | 0.345241 | 0.444763 |
| 13165 | SLC35E2  | 1544.198791 | -0.176117179 | 0.110704 | -1.59089  | 0.111634 | 0.166216 |
| 13168 | TLN1     | 10048.94022 | -0.176177737 | 0.110814 | -1.58985  | 0.111869 | 0.16652  |
| 8559  | KHSRP    | 1772.030796 | -0.176209928 | 0.055299 | -3.186492 | 0.00144  | 0.003298 |
| 13925 | ZNRF1    | 282.6387381 | -0.176270952 | 0.131295 | -1.342561 | 0.179414 | 0.252546 |
| 10235 | SF3A3    | 1433.122519 | -0.176301303 | 0.068578 | -2.570826 | 0.010146 | 0.01943  |
| 12098 | SRP19    | 566.9321581 | -0.176324087 | 0.091355 | -1.930088 | 0.053596 | 0.086835 |
| 11736 | FKBP15   | 1143.974476 | -0.176380031 | 0.086385 | -2.041798 | 0.041172 | 0.068763 |
| 14019 | C12orf44 | 792.6031235 | -0.176514384 | 0.134412 | -1.313234 | 0.189104 | 0.264401 |
| 16807 | PCDHA1   | 12.33873896 | -0.176563921 | 0.361278 | -0.488721 | 0.62504  | 0.728903 |
| 12658 | CBY1     | 537.2571336 | -0.176789565 | 0.100742 | -1.754882 | 0.07928  | 0.122765 |
| 14269 | TECPR1   | 305.3192756 | -0.176880041 | 0.142948 | -1.237375 | 0.215948 | 0.296643 |
| 12207 | OSGEP    | 330.8690994 | -0.17729596  | 0.09358  | -1.894587 | 0.058147 | 0.093368 |
| 13670 | SOD1     | 4304.769617 | -0.177356297 | 0.123876 | -1.431727 | 0.152222 | 0.218267 |
| 15699 | SERTAD1  | 595.7035264 | -0.177376461 | 0.219907 | -0.806598 | 0.419898 | 0.524264 |
| 13768 | BCL2L11  | 886.7537086 | -0.17742027  | 0.127054 | -1.396418 | 0.162589 | 0.231455 |
| 14679 | CTSH     | 2958.169442 | -0.178056064 | 0.160611 | -1.108618 | 0.267595 | 0.357322 |
| 13694 | LIX1L    | 882.037808  | -0.178123762 | 0.125528 | -1.418991 | 0.155902 | 0.223151 |
| 16877 | XK       | 51.4615309  | -0.178171406 | 0.378559 | -0.470658 | 0.637885 | 0.740842 |
| 15785 | FBXO32   | 265.441066  | -0.178249628 | 0.22858  | -0.779812 | 0.435502 | 0.540726 |

|       |          |             |              |          |           |          |          |
|-------|----------|-------------|--------------|----------|-----------|----------|----------|
| 10331 | MKRN1    | 2282.46473  | -0.178367501 | 0.070327 | -2.536276 | 0.011204 | 0.021257 |
| 14059 | GTPBP2   | 912.4114753 | -0.178434644 | 0.13732  | -1.29941  | 0.193803 | 0.270195 |
| 14033 | CAMLG    | 1142.912036 | -0.178489115 | 0.136407 | -1.308506 | 0.190702 | 0.266368 |
| 12686 | WHSC2    | 516.6391063 | -0.178513032 | 0.102465 | -1.742192 | 0.081475 | 0.125886 |
| 12062 | HEATR6   | 384.0513042 | -0.178638175 | 0.092078 | -1.940067 | 0.052371 | 0.085105 |
| 11837 | KDM2B    | 578.4823364 | -0.178661696 | 0.088919 | -2.009263 | 0.044509 | 0.073697 |
| 14563 | ZNF547   | 54.01110093 | -0.178722641 | 0.155736 | -1.147603 | 0.251132 | 0.338011 |
| 14133 | TAPBPL   | 932.9899813 | -0.178780592 | 0.139803 | -1.278801 | 0.200967 | 0.27872  |
| 16112 | FAM24B   | 30.2774479  | -0.178782708 | 0.264135 | -0.676861 | 0.498494 | 0.606441 |
| 13553 | PRR12    | 672.088497  | -0.178854864 | 0.121657 | -1.470162 | 0.141518 | 0.20467  |
| 11655 | MAP4     | 6267.408357 | -0.178916398 | 0.086871 | -2.059573 | 0.039439 | 0.066328 |
| 11804 | POM121C  | 1059.213823 | -0.178918837 | 0.088593 | -2.01957  | 0.043428 | 0.072114 |
| 11599 | C1orf50  | 153.3670281 | -0.178969377 | 0.086027 | -2.080377 | 0.037491 | 0.06335  |
| 16283 | NRTN     | 39.91103453 | -0.179175114 | 0.283134 | -0.632829 | 0.526845 | 0.634201 |
| 13662 | DIMT1L   | 384.9092737 | -0.179402947 | 0.125014 | -1.43506  | 0.15127  | 0.217029 |
| 15662 | PCDHB10  | 170.591568  | -0.179479155 | 0.219288 | -0.818464 | 0.413092 | 0.516985 |
| 14871 | SKIL     | 586.9588357 | -0.17966184  | 0.171842 | -1.045507 | 0.295789 | 0.38987  |
| 12997 | MKS1     | 240.994105  | -0.179822078 | 0.10924  | -1.646118 | 0.099739 | 0.150419 |
| 13935 | STUB1    | 1511.923571 | -0.179826444 | 0.134174 | -1.34025  | 0.180164 | 0.253419 |
| 16568 | RGS11    | 19.8470693  | -0.17999711  | 0.324383 | -0.554891 | 0.578969 | 0.684984 |
| 16634 | MMRN1    | 405.121795  | -0.180185529 | 0.333538 | -0.540225 | 0.589042 | 0.694109 |
| 15862 | NKPD1    | 4.031330691 | -0.18023558  | 0.23871  | -0.755041 | 0.450224 | 0.556352 |
| 15524 | SLC24A4  | 11.12899279 | -0.180622178 | 0.211944 | -0.852217 | 0.394094 | 0.497593 |
| 12227 | INPP5B   | 408.1528507 | -0.180657717 | 0.095625 | -1.889238 | 0.05886  | 0.094358 |
| 16354 | AGAP7    | 11.73416289 | -0.180765847 | 0.295104 | -0.612549 | 0.540175 | 0.647424 |
| 15646 | CRNA0011 | 33.20425747 | -0.180810564 | 0.219497 | -0.823749 | 0.410082 | 0.513753 |
| 16360 | REPS2    | 1312.488393 | -0.180941828 | 0.295946 | -0.611402 | 0.540934 | 0.648095 |
| 14366 | NARFL    | 567.1769655 | -0.181231207 | 0.14998  | -1.208367 | 0.226906 | 0.309583 |
| 16261 | RASSF9   | 29.1504964  | -0.18126467  | 0.284331 | -0.637514 | 0.52379  | 0.631376 |
| 11426 | RNF10    | 3656.763966 | -0.181271394 | 0.084697 | -2.140243 | 0.032335 | 0.05547  |
| 15407 | KRT8     | 11784.168   | -0.181297939 | 0.204286 | -0.887471 | 0.374825 | 0.476858 |
| 14278 | USMG5    | 903.5154747 | -0.181319136 | 0.146813 | -1.235033 | 0.216818 | 0.297651 |
| 13869 | TSPAN9   | 4094.440165 | -0.181365092 | 0.133189 | -1.361717 | 0.173287 | 0.244906 |
| 16258 | NOS2     | 57.63452519 | -0.181582339 | 0.284478 | -0.638301 | 0.523278 | 0.630903 |
| 11459 | TBC1D20  | 1409.156834 | -0.181709572 | 0.085237 | -2.13182  | 0.033022 | 0.056488 |
| 17367 | DEFA1B   | 4.84790995  | -0.181867281 | 0.52152  | -0.348725 | 0.727295 | 0.820816 |
| 16012 | SCARNA9  | 15.99214143 | -0.181941743 | 0.256936 | -0.708121 | 0.47887  | 0.586206 |
| 15867 | ID1      | 708.5944832 | -0.181961355 | 0.241454 | -0.753607 | 0.451085 | 0.55724  |
| 12799 | TRAF3    | 226.9531143 | -0.182308358 | 0.106986 | -1.704035 | 0.088374 | 0.135341 |
| 16557 | ACCN3    | 16.42624174 | -0.182338513 | 0.327409 | -0.556913 | 0.577587 | 0.683762 |
| 12788 | STK25    | 1891.097709 | -0.182427776 | 0.10681  | -1.707972 | 0.087642 | 0.134338 |
| 15948 | CLDND2   | 3.491218271 | -0.182518579 | 0.251193 | -0.726606 | 0.467467 | 0.574494 |
| 14013 | MRPL21   | 580.5997175 | -0.182531214 | 0.138837 | -1.314715 | 0.188606 | 0.263816 |
| 12768 | LMAN2L   | 902.244617  | -0.182566238 | 0.10654  | -1.713597 | 0.086603 | 0.13295  |
| 12112 | ACTR5    | 205.2516061 | -0.182756895 | 0.094975 | -1.924266 | 0.054321 | 0.087909 |
| 13203 | DMAP1    | 570.2037583 | -0.182785183 | 0.115804 | -1.578407 | 0.114472 | 0.169944 |
| 14076 | SH2B3    | 1910.465893 | -0.182818687 | 0.141183 | -1.294903 | 0.195354 | 0.272032 |

|       |          |             |              |          |           |          |          |
|-------|----------|-------------|--------------|----------|-----------|----------|----------|
| 12319 | BACE1    | 1254.958921 | -0.182987583 | 0.098412 | -1.859404 | 0.06297  | 0.100193 |
| 13897 | ATG4B    | 909.1663626 | -0.182989998 | 0.135593 | -1.349556 | 0.177158 | 0.249873 |
| 12946 | RRM1     | 1058.175889 | -0.183033895 | 0.110257 | -1.660058 | 0.096903 | 0.146716 |
| 13310 | FRMD8    | 888.5656657 | -0.183050041 | 0.118879 | -1.539797 | 0.12361  | 0.182034 |
| 14176 | PHTF2    | 651.3687483 | -0.183051476 | 0.144827 | -1.263931 | 0.206255 | 0.285186 |
| 14992 | ABCA1    | 2855.778845 | -0.183552982 | 0.181987 | -1.008606 | 0.313164 | 0.40944  |
| 16166 | C11orf41 | 28.13573549 | -0.183600158 | 0.277031 | -0.662742 | 0.507496 | 0.615283 |
| 15909 | GPR21    | 9.377741183 | -0.183624483 | 0.248555 | -0.738768 | 0.460048 | 0.566811 |
| 11872 | GPN2     | 231.7545831 | -0.183629776 | 0.091851 | -1.999224 | 0.045584 | 0.075261 |
| 17995 | GDNF     | 1.055426927 | -0.183658281 | 0.889465 | -0.206482 | 0.836415 | 0.911062 |
| 11406 | RAB35    | 1134.529022 | -0.183693615 | 0.085547 | -2.147284 | 0.031771 | 0.054598 |
| 11635 | MCM3     | 1158.767743 | -0.183764002 | 0.088919 | -2.066649 | 0.038767 | 0.06531  |
| 12213 | SDHAF2   | 602.8047274 | -0.183776915 | 0.097117 | -1.892326 | 0.058448 | 0.093797 |
| 12230 | ATP2A2   | 6639.312488 | -0.184112339 | 0.097508 | -1.888186 | 0.059001 | 0.094561 |
| 10679 | UTP11L   | 486.2616281 | -0.184189812 | 0.076668 | -2.40243  | 0.016287 | 0.029894 |
| 11137 | DCTN2    | 2561.686202 | -0.184220133 | 0.082209 | -2.240889 | 0.025033 | 0.044058 |
| 15429 | CCDC103  | 243.4321662 | -0.184260665 | 0.20917  | -0.880912 | 0.378366 | 0.480676 |
| 14032 | MRPS33   | 792.7985356 | -0.184266306 | 0.140744 | -1.309227 | 0.190457 | 0.266046 |
| 14365 | CDRT4    | 175.4252698 | -0.18432731  | 0.152499 | -1.208714 | 0.226773 | 0.309431 |
| 12851 | ZNF34    | 125.4699392 | -0.184733114 | 0.109255 | -1.690842 | 0.090867 | 0.138606 |
| 11112 | RELA     | 1971.362111 | -0.184796412 | 0.082204 | -2.248023 | 0.024575 | 0.043349 |
| 14771 | GIMAP4   | 1712.944099 | -0.184874026 | 0.171684 | -1.076829 | 0.281557 | 0.373624 |
| 11013 | DDX19B   | 813.719066  | -0.184896138 | 0.080879 | -2.286071 | 0.02225  | 0.039601 |
| 12979 | TULP3    | 874.7508724 | -0.185020533 | 0.112102 | -1.650459 | 0.098849 | 0.149286 |
| 12471 | SUMO3    | 2275.457911 | -0.185028609 | 0.102153 | -1.811296 | 0.070095 | 0.11017  |
| 15125 | SPATA2L  | 281.853451  | -0.185098623 | 0.191525 | -0.966446 | 0.333821 | 0.43261  |
| 12584 | STX5     | 886.1296756 | -0.185099804 | 0.104102 | -1.778062 | 0.075394 | 0.117434 |
| 13922 | TMEM49   | 2782.139919 | -0.18513305  | 0.137836 | -1.343143 | 0.179226 | 0.252335 |
| 14134 | SF11     | 323.7965778 | -0.185174522 | 0.144836 | -1.278515 | 0.201068 | 0.278841 |
| 13542 | METTL5   | 568.9912956 | -0.185229098 | 0.125754 | -1.472952 | 0.140764 | 0.203745 |
| 12867 | MYST1    | 665.1801761 | -0.185239998 | 0.109724 | -1.688242 | 0.091365 | 0.139181 |
| 14168 | SERTAD3  | 539.0317404 | -0.185278182 | 0.146352 | -1.265978 | 0.205521 | 0.284332 |
| 13392 | LZTR1    | 1139.302561 | -0.18541098  | 0.122562 | -1.512797 | 0.130331 | 0.190749 |
| 10807 | MADD     | 1021.011554 | -0.185625031 | 0.078675 | -2.35939  | 0.018305 | 0.0332   |
| 12222 | BRIX1    | 528.9209777 | -0.185758982 | 0.098252 | -1.89063  | 0.058674 | 0.094098 |
| 12272 | WBP2     | 3269.864973 | -0.185762427 | 0.09907  | -1.875055 | 0.060785 | 0.097087 |
| 13993 | CCDC142  | 176.8457556 | -0.185823414 | 0.140769 | -1.320062 | 0.186814 | 0.261684 |
| 16031 | ANKRD36F | 31.4242728  | -0.185840935 | 0.264686 | -0.702119 | 0.482605 | 0.590004 |
| 16590 | C12orf74 | 1.403536368 | -0.185942075 | 0.337841 | -0.550383 | 0.582057 | 0.687697 |
| 14754 | DLEU2    | 47.58467157 | -0.186165867 | 0.172029 | -1.082177 | 0.279174 | 0.370887 |
| 12035 | TCF25    | 1974.360427 | -0.186214143 | 0.09552  | -1.949476 | 0.051239 | 0.083451 |
| 12480 | STIP1    | 2252.834822 | -0.186223857 | 0.102952 | -1.808836 | 0.070476 | 0.11069  |
| 14229 | LAP3     | 2626.389902 | -0.1862948   | 0.149104 | -1.249425 | 0.21151  | 0.291363 |
| 13067 | MRPL10   | 1016.935976 | -0.186462552 | 0.114823 | -1.62392  | 0.104393 | 0.156593 |
| 15105 | ZNF767   | 214.3949785 | -0.186664055 | 0.191513 | -0.974681 | 0.329719 | 0.427859 |
| 11267 | SF3B3    | 3271.060091 | -0.186733274 | 0.085159 | -2.192763 | 0.028324 | 0.049276 |
| 12076 | PAXIP1   | 314.9084634 | -0.186757862 | 0.096485 | -1.935612 | 0.052915 | 0.085892 |

|       |           |             |              |          |           |          |          |
|-------|-----------|-------------|--------------|----------|-----------|----------|----------|
| 11583 | POLD3     | 386.094192  | -0.186827648 | 0.089452 | -2.088568 | 0.036747 | 0.062183 |
| 10662 | TTC4      | 503.4745927 | -0.187252041 | 0.077796 | -2.406952 | 0.016086 | 0.029573 |
| 14805 | JDP2      | 385.1461444 | -0.187256641 | 0.176042 | -1.063706 | 0.287462 | 0.380584 |
| 13225 | ABCC1     | 1648.356511 | -0.187257582 | 0.119091 | -1.572395 | 0.115859 | 0.171716 |
| 17473 | ZNF648    | 2.117558036 | -0.187332962 | 0.584905 | -0.320279 | 0.748757 | 0.839946 |
| 12038 | GLRX3     | 792.6396733 | -0.187432047 | 0.096173 | -1.948902 | 0.051307 | 0.083541 |
| 16175 | DGCR9     | 193.2702464 | -0.18745669  | 0.283536 | -0.66114  | 0.508523 | 0.616244 |
| 17071 | HGFAC     | 2.541465644 | -0.187518768 | 0.445598 | -0.420825 | 0.673883 | 0.773755 |
| 14587 | IFI27L1   | 95.48127087 | -0.187690037 | 0.16455  | -1.140626 | 0.254026 | 0.341342 |
| 15688 | PEX11G    | 86.12024565 | -0.187700992 | 0.231529 | -0.810702 | 0.417537 | 0.521682 |
| 11916 | TOMM6     | 1432.77816  | -0.187934644 | 0.094757 | -1.983327 | 0.047331 | 0.07786  |
| 15167 | SLC16A1   | 2640.453934 | -0.187968852 | 0.196467 | -0.956746 | 0.338696 | 0.437712 |
| 12511 | KIAA0146  | 661.6917165 | -0.188692325 | 0.104799 | -1.800513 | 0.07178  | 0.112457 |
| 13129 | WBP1      | 1495.832028 | -0.188791106 | 0.117979 | -1.600212 | 0.109552 | 0.163556 |
| 14082 | SARM1     | 590.6850042 | -0.18881244  | 0.14602  | -1.293058 | 0.195991 | 0.272804 |
| 14352 | RAB23     | 328.8109678 | -0.18892592  | 0.155779 | -1.212782 | 0.225213 | 0.307562 |
| 12536 | ING4      | 573.3382215 | -0.18902131  | 0.105358 | -1.794086 | 0.072799 | 0.113818 |
| 15825 | MFSD3     | 229.1684304 | -0.189128887 | 0.246446 | -0.767425 | 0.442829 | 0.548493 |
| 15236 | AFARP1    | 7.888394309 | -0.189149873 | 0.201805 | -0.937288 | 0.34861  | 0.448478 |
| 12874 | ZNF232    | 145.8457504 | -0.189355284 | 0.112396 | -1.684713 | 0.092044 | 0.140139 |
| 15638 | C14orf181 | 41.53038752 | -0.189435327 | 0.229692 | -0.824737 | 0.409521 | 0.513283 |
| 13444 | DHPS      | 861.387008  | -0.18950123  | 0.126136 | -1.502361 | 0.133004 | 0.193916 |
| 11853 | MRPS7     | 1117.908425 | -0.189650349 | 0.094591 | -2.004941 | 0.044969 | 0.074365 |
| 13791 | C11orf2   | 1811.870387 | -0.189654975 | 0.136565 | -1.388757 | 0.164907 | 0.23438  |
| 12097 | RBM34     | 691.7711798 | -0.189727275 | 0.098289 | -1.930306 | 0.053569 | 0.086799 |
| 16692 | HIST1H4I  | 1.355378753 | -0.189841572 | 0.364674 | -0.520579 | 0.60266  | 0.707693 |
| 10862 | TDP1      | 293.6132954 | -0.189899141 | 0.081297 | -2.335879 | 0.019498 | 0.035184 |
| 16212 | CCDC36    | 11.29643284 | -0.189966266 | 0.291313 | -0.652103 | 0.514334 | 0.621852 |
| 15565 | ATG16L2   | 439.8735095 | -0.19051794  | 0.225846 | -0.843575 | 0.398907 | 0.502326 |
| 12244 | TRIM21    | 623.2276536 | -0.190545423 | 0.101134 | -1.884083 | 0.059554 | 0.095338 |
| 14228 | AES       | 7723.541527 | -0.1905664   | 0.15252  | -1.249451 | 0.2115   | 0.291363 |
| 16237 | FSTL3     | 2765.285295 | -0.190776018 | 0.295843 | -0.644855 | 0.519021 | 0.626532 |
| 10938 | CCDC97    | 678.1568278 | -0.190849433 | 0.08271  | -2.30744  | 0.02103  | 0.037687 |
| 16332 | MAPK12    | 357.9431204 | -0.191110939 | 0.309426 | -0.617631 | 0.536818 | 0.644267 |
| 11904 | U2AF1     | 1319.14392  | -0.191235464 | 0.09628  | -1.986239 | 0.047007 | 0.077401 |
| 15453 | LOC728723 | 23.7151977  | -0.191255332 | 0.218856 | -0.873885 | 0.382181 | 0.484768 |
| 12843 | FARSB     | 824.2881613 | -0.19139817  | 0.113087 | -1.69248  | 0.090555 | 0.138204 |
| 13609 | BOLA1     | 217.6218282 | -0.191456115 | 0.131787 | -1.452772 | 0.146287 | 0.210697 |
| 14936 | PRDM1     | 724.1390636 | -0.191700316 | 0.187081 | -1.024691 | 0.305509 | 0.40093  |
| 10767 | PRKACA    | 1845.09044  | -0.191864547 | 0.080745 | -2.376168 | 0.017493 | 0.031846 |
| 11659 | CLNS1A    | 1247.692906 | -0.191975617 | 0.093224 | -2.059285 | 0.039467 | 0.066352 |
| 14559 | ST5       | 1008.23363  | -0.192024851 | 0.167238 | -1.148211 | 0.250882 | 0.337742 |
| 11605 | ATF6B     | 1605.853045 | -0.192521683 | 0.092592 | -2.079241 | 0.037595 | 0.063497 |
| 16133 | CX3CR1    | 392.4474859 | -0.192525283 | 0.286698 | -0.671526 | 0.501886 | 0.609773 |
| 11022 | AMZ2      | 1566.294077 | -0.192601876 | 0.084377 | -2.282632 | 0.022452 | 0.039928 |
| 14012 | AGXT2L2   | 1007.264316 | -0.19266948  | 0.146537 | -1.314821 | 0.18857  | 0.263785 |
| 11707 | TRIM62    | 142.4652899 | -0.19315545  | 0.094203 | -2.050407 | 0.040325 | 0.067519 |

|       |           |             |              |          |           |          |          |
|-------|-----------|-------------|--------------|----------|-----------|----------|----------|
| 15954 | HERC2P2   | 795.8238126 | -0.193348979 | 0.266325 | -0.725988 | 0.467846 | 0.574757 |
| 13856 | RPL36AL   | 3290.535417 | -0.193384392 | 0.141518 | -1.366498 | 0.171783 | 0.243008 |
| 13016 | BYSL      | 329.0463363 | -0.193605205 | 0.118133 | -1.638869 | 0.101241 | 0.15246  |
| 14208 | PFKL      | 6436.104445 | -0.193631764 | 0.154401 | -1.254085 | 0.209811 | 0.28945  |
| 17565 | ALPI      | 365.0076368 | -0.193689923 | 0.647302 | -0.299226 | 0.764767 | 0.853233 |
| 11519 | ATP1B3    | 1995.24124  | -0.193841582 | 0.091842 | -2.110602 | 0.034807 | 0.059228 |
| 11944 | RBM33     | 1154.391321 | -0.194021659 | 0.098099 | -1.977809 | 0.04795  | 0.07869  |
| 16375 | TEKT4     | 5.642557055 | -0.194023662 | 0.319574 | -0.607132 | 0.543764 | 0.650889 |
| 11377 | JAGN1     | 635.0858746 | -0.19419731  | 0.089916 | -2.159753 | 0.030792 | 0.05305  |
| 13467 | AKAP8L    | 760.7889742 | -0.194395948 | 0.129849 | -1.497087 | 0.134371 | 0.195565 |
| 13975 | TTLL4     | 346.2114355 | -0.19453887  | 0.146734 | -1.325792 | 0.184909 | 0.259348 |
| 15988 | CCDC116   | 3.88443926  | -0.194720961 | 0.27205  | -0.715754 | 0.474144 | 0.581291 |
| 11825 | YARS2     | 331.9995777 | -0.194793461 | 0.096777 | -2.012798 | 0.044136 | 0.073159 |
| 16066 | STEAP4    | 960.7105213 | -0.194832381 | 0.280956 | -0.693463 | 0.488019 | 0.595492 |
| 16910 | SEPT7L    | 0.650767751 | -0.195042383 | 0.421591 | -0.462634 | 0.643627 | 0.746051 |
| 14138 | IL17RC    | 559.5639519 | -0.195120494 | 0.152905 | -1.276087 | 0.201925 | 0.27995  |
| 13550 | LASS2     | 8733.385365 | -0.19516537  | 0.132664 | -1.47112  | 0.141259 | 0.20434  |
| 13546 | RPF2      | 492.3676145 | -0.195167229 | 0.132557 | -1.472322 | 0.140934 | 0.203931 |
| 15205 | HES1      | 968.3456044 | -0.195214427 | 0.206403 | -0.945792 | 0.344255 | 0.443765 |
| 14901 | DPYD      | 786.7601177 | -0.195219559 | 0.188434 | -1.036012 | 0.300196 | 0.394883 |
| 13355 | GGA1      | 992.9873598 | -0.19534153  | 0.128005 | -1.526051 | 0.126997 | 0.186392 |
| 11836 | POMP      | 1747.930711 | -0.195623503 | 0.097351 | -2.009459 | 0.044489 | 0.073679 |
| 15305 | RNF144A   | 537.6932741 | -0.195754621 | 0.21284  | -0.919727 | 0.357715 | 0.458123 |
| 9637  | NUDT3     | 479.8507956 | -0.195773972 | 0.070767 | -2.766472 | 0.005667 | 0.011526 |
| 11346 | ZNF7      | 382.517383  | -0.196019239 | 0.090465 | -2.166801 | 0.03025  | 0.052259 |
| 15404 | GIPC3     | 392.7013964 | -0.196039427 | 0.220342 | -0.889706 | 0.373624 | 0.475422 |
| 13229 | SLC1A4    | 782.0048958 | -0.196178613 | 0.124797 | -1.571976 | 0.115956 | 0.171809 |
| 13988 | TCEA2     | 361.5041467 | -0.197147661 | 0.149164 | -1.321688 | 0.186272 | 0.261018 |
| 12507 | IRF9      | 1108.341007 | -0.197228338 | 0.109513 | -1.800963 | 0.071709 | 0.112382 |
| 13278 | TRMU      | 320.2455121 | -0.197556513 | 0.127329 | -1.551543 | 0.120772 | 0.178283 |
| 12447 | BLVRA     | 1087.592251 | -0.197596168 | 0.10848  | -1.821496 | 0.068532 | 0.107921 |
| 11527 | SNRPD3    | 1252.812258 | -0.197636688 | 0.093729 | -2.108608 | 0.034978 | 0.059479 |
| 16456 | CLRN3     | 970.096873  | -0.197657539 | 0.337562 | -0.585545 | 0.558181 | 0.664859 |
| 14727 | PTPRS     | 1059.655721 | -0.197677433 | 0.181291 | -1.090389 | 0.275542 | 0.366734 |
| 13408 | PARP14    | 3276.498212 | -0.197856035 | 0.131003 | -1.510321 | 0.130961 | 0.191442 |
| 13775 | LOC152217 | 259.7536536 | -0.197943    | 0.141912 | -1.394832 | 0.163067 | 0.232034 |
| 11902 | GMEM184E  | 1833.313318 | -0.197944915 | 0.099613 | -1.987138 | 0.046907 | 0.07725  |
| 14824 | KIAA1462  | 2112.286548 | -0.198008686 | 0.187194 | -1.05777  | 0.29016  | 0.383664 |
| 11288 | PDCD11    | 803.3646448 | -0.19801727  | 0.090717 | -2.182806 | 0.02905  | 0.050444 |
| 15365 | RPS2P32   | 25.67924308 | -0.198062405 | 0.219933 | -0.900556 | 0.367824 | 0.46923  |
| 13491 | ARF4      | 3501.663445 | -0.198099267 | 0.132893 | -1.490671 | 0.136048 | 0.197663 |
| 14271 | TRERF1    | 228.158429  | -0.198116549 | 0.160186 | -1.236788 | 0.216166 | 0.2969   |
| 16422 | STOX1     | 45.55688242 | -0.19820352  | 0.331585 | -0.597746 | 0.55001  | 0.656482 |
| 15006 | LOC441294 | 71.80088096 | -0.198306649 | 0.197057 | -1.006343 | 0.31425  | 0.410477 |
| 14477 | CDH24     | 126.593073  | -0.198376974 | 0.16882  | -1.175077 | 0.239964 | 0.324897 |
| 15992 | ABCD2     | 33.52777595 | -0.19842735  | 0.277674 | -0.714606 | 0.474853 | 0.581959 |
| 11896 | FBXW8     | 436.7951858 | -0.198499087 | 0.099764 | -1.989686 | 0.046626 | 0.076825 |

|       |           |             |              |          |           |          |          |
|-------|-----------|-------------|--------------|----------|-----------|----------|----------|
| 15257 | PALM      | 426.1071066 | -0.198856528 | 0.213487 | -0.931469 | 0.351611 | 0.451722 |
| 11012 | SNUPN     | 440.1448786 | -0.19893112  | 0.087009 | -2.286321 | 0.022236 | 0.039578 |
| 17790 | OPRK1     | 0.501064427 | -0.199289612 | 0.805879 | -0.247295 | 0.80468  | 0.886568 |
| 15750 | HIST1H2BI | 7.005282783 | -0.199314467 | 0.25224  | -0.790178 | 0.429424 | 0.534421 |
| 14910 | HOXA4     | 397.5006312 | -0.199394381 | 0.192952 | -1.03339  | 0.301421 | 0.396255 |
| 13648 | NDUFB10   | 1799.357203 | -0.199493557 | 0.138665 | -1.438677 | 0.150242 | 0.215775 |
| 11344 | RANBP3    | 967.3377588 | -0.199557265 | 0.092054 | -2.167837 | 0.030171 | 0.052132 |
| 13079 | ILKAP     | 379.1607275 | -0.19957484  | 0.123206 | -1.619846 | 0.105265 | 0.157753 |
| 11924 | POLR3C    | 524.3258622 | -0.19964623  | 0.100779 | -1.98102  | 0.047589 | 0.078228 |
| 13105 | RAB43     | 311.5606941 | -0.199734143 | 0.124124 | -1.609144 | 0.107585 | 0.160917 |
| 14152 | METTL11A  | 361.4164654 | -0.199828036 | 0.15726  | -1.270688 | 0.20384  | 0.282325 |
| 14282 | CEP110    | 288.6193093 | -0.199896722 | 0.161942 | -1.234373 | 0.217064 | 0.297904 |
| 14439 | C14orf149 | 177.1558775 | -0.200065513 | 0.168606 | -1.186584 | 0.235392 | 0.319545 |
| 7334  | EIF2B1    | 1031.771562 | -0.200157594 | 0.054279 | -3.68754  | 0.000226 | 0.000605 |
| 11657 | SURF4     | 5276.989534 | -0.200462582 | 0.097341 | -2.059383 | 0.039458 | 0.066347 |
| 12898 | SLC39A1   | 4096.520575 | -0.200465463 | 0.119782 | -1.673585 | 0.094212 | 0.143175 |
| 15046 | PCYT2     | 521.4227729 | -0.200521832 | 0.202006 | -0.992651 | 0.32088  | 0.418023 |
| 13466 | XRCC6BP1  | 121.9065383 | -0.200624992 | 0.134003 | -1.497164 | 0.134351 | 0.19556  |
| 14275 | SGALNAC   | 740.5487221 | -0.200843052 | 0.162566 | -1.235454 | 0.216662 | 0.297498 |
| 13027 | SSBP3     | 590.5159807 | -0.200999935 | 0.122938 | -1.634972 | 0.102055 | 0.153556 |
| 12439 | REXO4     | 523.9241869 | -0.201025765 | 0.110155 | -1.824929 | 0.068012 | 0.107171 |
| 13104 | ALG12     | 743.6639493 | -0.201046025 | 0.124941 | -1.609132 | 0.107587 | 0.160917 |
| 14612 | CAMKK1    | 293.8654259 | -0.201100223 | 0.178052 | -1.129444 | 0.258711 | 0.347043 |
| 12866 | DCAKD     | 663.6463094 | -0.2012164   | 0.119185 | -1.688268 | 0.09136  | 0.139181 |
| 13825 | NPM1      | 12562.44563 | -0.201378013 | 0.14617  | -1.377695 | 0.168297 | 0.238611 |
| 15026 | DECR2     | 940.4478325 | -0.201477212 | 0.201799 | -0.998405 | 0.318083 | 0.414931 |
| 13898 | LONP1     | 2341.757027 | -0.201604933 | 0.149397 | -1.349454 | 0.177191 | 0.249901 |
| 11430 | LEMD2     | 904.7322702 | -0.201604975 | 0.094224 | -2.139629 | 0.032385 | 0.055536 |
| 11701 | DERL2     | 711.4819732 | -0.201614564 | 0.098294 | -2.051135 | 0.040254 | 0.067426 |
| 11720 | ATG10     | 129.4309091 | -0.201675171 | 0.098557 | -2.046273 | 0.04073  | 0.068118 |
| 12033 | ZNF691    | 230.6792978 | -0.201905608 | 0.103437 | -1.951975 | 0.050941 | 0.08298  |
| 16303 | KIAA1875  | 22.87727142 | -0.202354677 | 0.323053 | -0.626383 | 0.531064 | 0.638495 |
| 15571 | GPR63     | 6.249679531 | -0.202361407 | 0.240195 | -0.842487 | 0.399515 | 0.502915 |
| 12861 | HAUS1     | 286.868958  | -0.20238418  | 0.119802 | -1.689327 | 0.091157 | 0.138924 |
| 12825 | SCAF1     | 1313.001522 | -0.20247532  | 0.119298 | -1.697222 | 0.089655 | 0.137023 |
| 15766 | LOC256880 | 4.656470019 | -0.202565044 | 0.257745 | -0.785911 | 0.431919 | 0.536982 |
| 15700 | TCF7      | 236.1321809 | -0.202606266 | 0.251218 | -0.806496 | 0.419957 | 0.524304 |
| 14558 | HOXC9     | 122.2932147 | -0.202954042 | 0.176735 | -1.148352 | 0.250823 | 0.337711 |
| 15390 | ANKRD23   | 31.41601553 | -0.203032835 | 0.227384 | -0.892908 | 0.371906 | 0.473667 |
| 13127 | ZNF558    | 438.0489012 | -0.203119284 | 0.126843 | -1.601344 | 0.109301 | 0.163206 |
| 12468 | ZBED1     | 1911.677309 | -0.203393143 | 0.112246 | -1.812034 | 0.069981 | 0.110017 |
| 10778 | KIAA0652  | 1898.860733 | -0.20357939  | 0.085894 | -2.370124 | 0.017782 | 0.032339 |
| 12693 | ANKMY1    | 177.4289141 | -0.20366683  | 0.117325 | -1.735915 | 0.082579 | 0.127521 |
| 12567 | UBR4      | 4014.699064 | -0.203675729 | 0.114422 | -1.783194 | 0.074555 | 0.116285 |
| 16489 | PROK2     | 4.70358818  | -0.203687531 | 0.354098 | -0.57523  | 0.565136 | 0.671795 |
| 15452 | FAM176A   | 743.0300628 | -0.203707536 | 0.233045 | -0.874111 | 0.382058 | 0.484643 |
| 16296 | CYP27B1   | 51.00811719 | -0.203836082 | 0.32437  | -0.628406 | 0.529738 | 0.637174 |

|       |           |             |              |          |           |          |          |
|-------|-----------|-------------|--------------|----------|-----------|----------|----------|
| 13958 | LOC253724 | 14.55187651 | -0.203971869 | 0.153116 | -1.332137 | 0.182815 | 0.256724 |
| 12832 | STK11     | 894.9660849 | -0.204153812 | 0.120427 | -1.695244 | 0.090029 | 0.13752  |
| 13271 | TMEM115   | 1019.587104 | -0.204183647 | 0.131262 | -1.555545 | 0.119816 | 0.176966 |
| 16153 | LRRC69    | 3.134953878 | -0.204339441 | 0.306984 | -0.665636 | 0.505644 | 0.613578 |
| 15707 | CRNA0009  | 8.257308514 | -0.20438404  | 0.254389 | -0.803431 | 0.421726 | 0.526278 |
| 9308  | ZC3H4     | 838.3266774 | -0.204603204 | 0.070632 | -2.896768 | 0.00377  | 0.00794  |
| 13179 | MMAB      | 759.0427941 | -0.204627847 | 0.128988 | -1.586412 | 0.112646 | 0.167537 |
| 12126 | ICT1      | 371.1864393 | -0.204726173 | 0.106678 | -1.919097 | 0.054972 | 0.088859 |
| 15059 | AATK      | 81.37939791 | -0.204801419 | 0.20734  | -0.987756 | 0.323272 | 0.420776 |
| 12303 | ZBTB45    | 215.0978865 | -0.204971936 | 0.109963 | -1.864008 | 0.062321 | 0.099288 |
| 17199 | OLFM4     | 3.56219439  | -0.204990124 | 0.529041 | -0.387475 | 0.698405 | 0.795943 |
| 14513 | MYLK      | 4320.551197 | -0.205001035 | 0.176373 | -1.162313 | 0.245108 | 0.331039 |
| 13507 | EFHC1     | 364.1329617 | -0.205001978 | 0.137983 | -1.485706 | 0.137357 | 0.199329 |
| 15035 | UCP3      | 21.20261774 | -0.205003754 | 0.205827 | -0.996002 | 0.319249 | 0.416203 |
| 14129 | ERAP1     | 2581.067699 | -0.205054099 | 0.16028  | -1.279348 | 0.200774 | 0.278532 |
| 13318 | TMEM231   | 255.1014915 | -0.205141136 | 0.133419 | -1.537565 | 0.124155 | 0.182727 |
| 14345 | NDUFA11   | 1496.834659 | -0.205334911 | 0.168905 | -1.215683 | 0.224106 | 0.306218 |
| 16527 | PYGO1     | 9.145168047 | -0.205475503 | 0.363607 | -0.565103 | 0.572004 | 0.678396 |
| 14166 | AVL9      | 331.1631376 | -0.205662123 | 0.162405 | -1.266353 | 0.205387 | 0.284183 |
| 12542 | FZR1      | 790.7539603 | -0.205786362 | 0.114757 | -1.793232 | 0.072936 | 0.113986 |
| 14450 | ARRDC4    | 1409.097194 | -0.206000191 | 0.174201 | -1.182543 | 0.23699  | 0.32147  |
| 12560 | TFE3      | 1675.568438 | -0.206020237 | 0.115395 | -1.785341 | 0.074206 | 0.115805 |
| 13819 | ODF2L     | 357.3858794 | -0.206167724 | 0.149411 | -1.379867 | 0.167628 | 0.237765 |
| 11484 | MAPK3     | 1594.991116 | -0.206271384 | 0.097017 | -2.126128 | 0.033493 | 0.057165 |
| 16407 | B3GNT8    | 82.21157441 | -0.206300478 | 0.343907 | -0.599874 | 0.548591 | 0.655386 |
| 13025 | TBC1D10A  | 440.919193  | -0.206412865 | 0.126194 | -1.635678 | 0.101907 | 0.153357 |
| 13116 | FAM160B2  | 758.5336702 | -0.206426262 | 0.128498 | -1.606449 | 0.108175 | 0.161661 |
| 12865 | CECR5     | 619.4682888 | -0.206503597 | 0.122305 | -1.68843  | 0.091329 | 0.139148 |
| 14162 | ZNF276    | 479.1627014 | -0.206642386 | 0.163034 | -1.267476 | 0.204985 | 0.283711 |
| 12217 | CINP      | 419.5440455 | -0.206791792 | 0.10934  | -1.891282 | 0.058587 | 0.093999 |
| 12111 | GDI1      | 3304.032417 | -0.206959827 | 0.107529 | -1.924692 | 0.054268 | 0.08783  |
| 12982 | KIAA0427  | 682.4285516 | -0.207145511 | 0.125564 | -1.649717 | 0.099001 | 0.149478 |
| 17866 | OR52N2    | 0.454940261 | -0.207162144 | 0.884042 | -0.234335 | 0.814725 | 0.893794 |
| 15037 | ATP5D     | 1468.319589 | -0.207241938 | 0.208205 | -0.995376 | 0.319554 | 0.416544 |
| 12089 | NPLOC4    | 2544.262065 | -0.207510238 | 0.107423 | -1.931716 | 0.053395 | 0.086573 |
| 10569 | HNRNPA1   | 5959.593167 | -0.207602429 | 0.084823 | -2.447491 | 0.014385 | 0.026679 |
| 11931 | EXOSC8    | 263.937468  | -0.207779967 | 0.104948 | -1.979838 | 0.047722 | 0.0784   |
| 12958 | LENG1     | 160.5651505 | -0.20789001  | 0.125659 | -1.654397 | 0.098047 | 0.148311 |
| 13500 | HLA-B     | 61142.69205 | -0.207989374 | 0.1397   | -1.488828 | 0.136533 | 0.198235 |
| 14387 | FBXL13    | 12.98893448 | -0.208095932 | 0.173161 | -1.201751 | 0.22946  | 0.312619 |
| 16903 | ADH1B     | 439.5461966 | -0.20817885  | 0.448368 | -0.464303 | 0.64243  | 0.744973 |
| 13440 | C1orf112  | 94.25989469 | -0.208246    | 0.138533 | -1.50322  | 0.132782 | 0.193651 |
| 14635 | ID3       | 1790.055924 | -0.20829281  | 0.185686 | -1.121749 | 0.261969 | 0.350862 |
| 11417 | SP100     | 1989.330425 | -0.208396293 | 0.097227 | -2.143391 | 0.032082 | 0.055079 |
| 14770 | EHD3      | 559.1036172 | -0.208485659 | 0.193439 | -1.077787 | 0.281129 | 0.373081 |
| 12822 | ARHGAP25  | 770.8639856 | -0.208507182 | 0.122753 | -1.698588 | 0.089397 | 0.136661 |
| 8452  | USP39     | 802.9270719 | -0.208551656 | 0.064623 | -3.227201 | 0.00125  | 0.002899 |



|       |           |             |              |          |           |          |          |
|-------|-----------|-------------|--------------|----------|-----------|----------|----------|
| 17089 | DDX43     | 18.95333559 | -0.208744355 | 0.502017 | -0.415812 | 0.677548 | 0.777144 |
| 11576 | JOSD1     | 1450.863609 | -0.209365616 | 0.100198 | -2.089521 | 0.036661 | 0.06207  |
| 15375 | PRR22     | 42.38419787 | -0.209404531 | 0.233738 | -0.895896 | 0.370308 | 0.472092 |
| 14174 | C11orf51  | 449.7946835 | -0.209544929 | 0.16576  | -1.264149 | 0.206177 | 0.285098 |
| 11231 | TXLNA     | 1859.103196 | -0.209597734 | 0.09494  | -2.207684 | 0.027266 | 0.047587 |
| 15578 | JAM2      | 183.1719659 | -0.209616036 | 0.249271 | -0.840915 | 0.400396 | 0.503797 |
| 11291 | MFSD11    | 433.2247297 | -0.209680381 | 0.096154 | -2.180679 | 0.029207 | 0.050703 |
| 9957  | TBC1D25   | 456.2981864 | -0.209818315 | 0.078624 | -2.668617 | 0.007616 | 0.014993 |
| 15289 | SOX17     | 139.2434866 | -0.209872977 | 0.22722  | -0.923656 | 0.355666 | 0.455975 |
| 12181 | ACAT2     | 277.6476659 | -0.210035152 | 0.110428 | -1.902018 | 0.057169 | 0.091992 |
| 15348 | FLJ12825  | 14.8168333  | -0.210095021 | 0.231968 | -0.905708 | 0.36509  | 0.466263 |
| 16416 | THBS4     | 105.5110964 | -0.210138302 | 0.350865 | -0.598914 | 0.54923  | 0.655801 |
| 13246 | CBFB      | 1187.586441 | -0.210417622 | 0.13454  | -1.563976 | 0.117823 | 0.174351 |
| 11536 | FAM127C   | 506.7288976 | -0.210446765 | 0.100012 | -2.104218 | 0.035359 | 0.06008  |
| 15989 | NPAS1     | 15.78972803 | -0.210766491 | 0.294543 | -0.715571 | 0.474256 | 0.581393 |
| 11992 | SYVN1     | 1691.135241 | -0.210988851 | 0.107497 | -1.962741 | 0.049676 | 0.081196 |
| 13411 | UBL5      | 1824.582966 | -0.211156305 | 0.139842 | -1.509959 | 0.131054 | 0.191543 |
| 12610 | TSSC1     | 476.7940305 | -0.211398056 | 0.119526 | -1.768633 | 0.076955 | 0.119619 |
| 12942 | EGLN2     | 1135.395538 | -0.211494746 | 0.127275 | -1.661714 | 0.09657  | 0.146258 |
| 15830 | SPIRE2    | 126.0535379 | -0.211942671 | 0.276474 | -0.766591 | 0.443325 | 0.548933 |
| 16395 | SFRP1     | 154.3560701 | -0.21260435  | 0.352971 | -0.602328 | 0.546956 | 0.653912 |
| 15262 | RYR3      | 14.3975225  | -0.212679494 | 0.228661 | -0.930108 | 0.352315 | 0.452479 |
| 11977 | SSU72     | 1812.691905 | -0.212905693 | 0.108286 | -1.966151 | 0.049281 | 0.080644 |
| 15253 | WDR52     | 117.0567012 | -0.212905811 | 0.228393 | -0.932191 | 0.351238 | 0.451361 |
| 12835 | MRPL27    | 837.2961721 | -0.212981812 | 0.125758 | -1.693585 | 0.090344 | 0.137959 |
| 11978 | UBE2D4    | 303.5386735 | -0.213167674 | 0.108418 | -1.966169 | 0.049279 | 0.080644 |
| 10558 | LSM12     | 826.1610387 | -0.213168485 | 0.087023 | -2.44956  | 0.014303 | 0.026554 |
| 15932 | JAKMIP3   | 6.968189453 | -0.213358086 | 0.291016 | -0.73315  | 0.463467 | 0.5702   |
| 13629 | HSD17B1   | 27.94852783 | -0.213476072 | 0.14777  | -1.444653 | 0.148555 | 0.21365  |
| 8795  | RBM17     | 1211.595021 | -0.213479821 | 0.069147 | -3.087344 | 0.00202  | 0.004501 |
| 9536  | SERPINB6  | 2976.22986  | -0.213615622 | 0.076187 | -2.803832 | 0.00505  | 0.01038  |
| 13192 | WIPF1     | 2376.313111 | -0.213647131 | 0.135103 | -1.581362 | 0.113795 | 0.16908  |
| 13792 | B3GALT4   | 159.9919122 | -0.213678464 | 0.153873 | -1.388665 | 0.164935 | 0.234403 |
| 14575 | LOC440957 | 112.1306956 | -0.213933705 | 0.18699  | -1.144093 | 0.252585 | 0.339686 |
| 12291 | ZNF777    | 339.9227987 | -0.214158775 | 0.11462  | -1.868424 | 0.061703 | 0.098401 |
| 16477 | RAB26     | 22.23483569 | -0.214286359 | 0.370457 | -0.578437 | 0.562969 | 0.669707 |
| 10196 | THADA     | 901.8854454 | -0.214379469 | 0.083006 | -2.582684 | 0.009804 | 0.018846 |
| 10369 | ZCCHC17   | 577.9507487 | -0.214496191 | 0.085147 | -2.519134 | 0.011764 | 0.022239 |
| 12359 | PSMD14    | 1212.835519 | -0.214547407 | 0.116109 | -1.847805 | 0.064631 | 0.102502 |
| 15979 | HES2      | 32.76280356 | -0.214940904 | 0.29941  | -0.71788  | 0.472831 | 0.580009 |
| 13303 | FANCE     | 62.27123495 | -0.214995324 | 0.139431 | -1.541948 | 0.123086 | 0.181358 |
| 15742 | GP5       | 6.706532397 | -0.215072902 | 0.271826 | -0.791217 | 0.428818 | 0.533854 |
| 16318 | EFCAB3    | 6.425004512 | -0.215327091 | 0.345126 | -0.623908 | 0.532688 | 0.639859 |
| 16362 | DC1001315 | 628.3927185 | -0.215329832 | 0.353117 | -0.609797 | 0.541996 | 0.649289 |
| 16424 | LAMA2     | 233.8469463 | -0.215510673 | 0.360967 | -0.597037 | 0.550482 | 0.656994 |
| 12302 | YWHAZ     | 14739.10358 | -0.215611208 | 0.115659 | -1.864205 | 0.062293 | 0.099252 |
| 17628 | ONECUT1   | 0.502982361 | -0.21563161  | 0.756711 | -0.284959 | 0.775676 | 0.862493 |

|       |           |             |              |          |           |          |          |
|-------|-----------|-------------|--------------|----------|-----------|----------|----------|
| 12916 | CRLF3     | 373.8916644 | -0.215833472 | 0.129373 | -1.668307 | 0.095255 | 0.144546 |
| 15133 | ADAMTS1   | 3138.076728 | -0.216138456 | 0.224277 | -0.963713 | 0.33519  | 0.434084 |
| 14020 | BACH1     | 1599.269045 | -0.216231813 | 0.164678 | -1.313056 | 0.189164 | 0.264466 |
| 9621  | SNAPIN    | 605.8812193 | -0.216709256 | 0.078175 | -2.772113 | 0.005569 | 0.011347 |
| 11209 | PEF1      | 1549.720352 | -0.21673404  | 0.09772  | -2.217902 | 0.026562 | 0.046448 |
| 12247 | PIN4      | 354.2669642 | -0.217217327 | 0.115334 | -1.883371 | 0.05965  | 0.095468 |
| 14916 | FLJ10661  | 10.26799424 | -0.217379063 | 0.210711 | -1.031643 | 0.302239 | 0.397144 |
| 15764 | PCDHB16   | 399.230167  | -0.217393887 | 0.276581 | -0.786004 | 0.431865 | 0.536948 |
| 10125 | SNX17     | 2612.417185 | -0.217483173 | 0.08342  | -2.607078 | 0.009132 | 0.017678 |
| 17390 | TTY15     | 72.57227806 | -0.217781616 | 0.633134 | -0.343974 | 0.730866 | 0.823808 |
| 12165 | TK2       | 1121.76838  | -0.217911529 | 0.114237 | -1.907545 | 0.05645  | 0.090956 |
| 13783 | DISC1     | 276.889595  | -0.217940965 | 0.15652  | -1.392415 | 0.163797 | 0.232938 |
| 13765 | LOC727896 | 23.90349236 | -0.217995664 | 0.156043 | -1.397022 | 0.162407 | 0.231263 |
| 13095 | KIAA0513  | 367.0684427 | -0.21804861  | 0.135201 | -1.612774 | 0.106794 | 0.159852 |
| 14403 | DDX26B    | 223.6362476 | -0.218076936 | 0.182155 | -1.197206 | 0.231226 | 0.314675 |
| 14777 | SMO       | 993.3837312 | -0.21833295  | 0.203026 | -1.075395 | 0.282198 | 0.374322 |
| 12974 | SFRS17A   | 831.7456048 | -0.218677386 | 0.132429 | -1.651277 | 0.098682 | 0.149088 |
| 13004 | CLPTMIL   | 3654.851446 | -0.218730325 | 0.133117 | -1.643144 | 0.100353 | 0.151263 |
| 13672 | SELO      | 390.1762516 | -0.218869334 | 0.152977 | -1.430732 | 0.152507 | 0.218643 |
| 13640 | ZNF414    | 144.3574124 | -0.218880012 | 0.151909 | -1.440867 | 0.149622 | 0.215011 |
| 12696 | HDGF      | 5964.638963 | -0.218936224 | 0.126177 | -1.735149 | 0.082714 | 0.127694 |
| 15270 | RASIP1    | 522.2355942 | -0.219003744 | 0.235998 | -0.927989 | 0.353413 | 0.453651 |
| 13189 | TRAPPC9   | 787.1343375 | -0.219216878 | 0.138475 | -1.583075 | 0.113404 | 0.168537 |
| 15042 | C7orf58   | 343.4772714 | -0.21921862  | 0.220517 | -0.994113 | 0.320168 | 0.417206 |
| 14372 | C18orf54  | 133.0224747 | -0.219373302 | 0.181807 | -1.206627 | 0.227576 | 0.310375 |
| 12273 | CBX3      | 3360.022167 | -0.219399024 | 0.11703  | -1.874719 | 0.060831 | 0.097153 |
| 13956 | MRAS      | 810.0422086 | -0.219409744 | 0.164628 | -1.332763 | 0.182609 | 0.256454 |
| 15271 | IRS1      | 604.0958851 | -0.219442966 | 0.236541 | -0.927716 | 0.353555 | 0.453803 |
| 15866 | MYH3      | 39.52544406 | -0.219445547 | 0.291144 | -0.753735 | 0.451008 | 0.55718  |
| 14505 | TRIM16L   | 158.750934  | -0.219461158 | 0.188391 | -1.164924 | 0.24405  | 0.329791 |
| 15052 | SIK1      | 1890.33791  | -0.219570223 | 0.221764 | -0.990108 | 0.322121 | 0.419472 |
| 12644 | RAD52     | 140.7899354 | -0.220174207 | 0.12517  | -1.758995 | 0.078578 | 0.121814 |
| 11328 | IQCG      | 165.2575665 | -0.22031422  | 0.101475 | -2.171114 | 0.029923 | 0.051775 |
| 11158 | RNASEH1   | 235.9510603 | -0.220693525 | 0.098711 | -2.23575  | 0.025368 | 0.044564 |
| 11487 | ADPRH     | 517.0310842 | -0.220757354 | 0.103857 | -2.125587 | 0.033538 | 0.057227 |
| 10214 | TGIF2     | 490.6220532 | -0.220797753 | 0.085685 | -2.576856 | 0.00997  | 0.019133 |
| 15387 | KCNJ2     | 417.628271  | -0.22097358  | 0.247296 | -0.89356  | 0.371557 | 0.473315 |
| 13918 | UNC119    | 399.0792784 | -0.220984658 | 0.164296 | -1.345038 | 0.178613 | 0.251544 |
| 13503 | MDH2      | 3764.489042 | -0.221121651 | 0.148591 | -1.488121 | 0.136719 | 0.198462 |
| 15307 | OBSL1     | 1916.575105 | -0.221175509 | 0.240609 | -0.91923  | 0.357975 | 0.458395 |
| 10433 | RNPEP     | 1616.3491   | -0.221251798 | 0.088515 | -2.49959  | 0.012434 | 0.02336  |
| 11892 | SCYL1     | 1870.315065 | -0.22128452  | 0.111127 | -1.991272 | 0.046451 | 0.076563 |
| 13639 | CMTM1     | 115.6761976 | -0.221403648 | 0.153578 | -1.441636 | 0.149405 | 0.214714 |
| 13971 | DENND2D   | 793.4305545 | -0.222082255 | 0.167219 | -1.328092 | 0.184148 | 0.258355 |
| 13814 | PIGL      | 82.93871181 | -0.222171273 | 0.16077  | -1.381921 | 0.166996 | 0.236955 |
| 16604 | BDKRB1    | 42.17427263 | -0.222175048 | 0.405428 | -0.548001 | 0.583691 | 0.689047 |
| 13081 | AHCY      | 3829.950482 | -0.222184368 | 0.137173 | -1.619742 | 0.105288 | 0.157766 |

|       |           |             |              |          |           |          |          |
|-------|-----------|-------------|--------------|----------|-----------|----------|----------|
| 17418 | PSMA8     | 0.438648095 | -0.222274705 | 0.658783 | -0.337402 | 0.735814 | 0.828034 |
| 11623 | WIZ       | 1009.924852 | -0.222424035 | 0.10739  | -2.071183 | 0.038342 | 0.064659 |
| 13831 | ANTXR2    | 1054.703852 | -0.222466592 | 0.161827 | -1.374721 | 0.169218 | 0.239812 |
| 10648 | GPN1      | 880.54915   | -0.222692315 | 0.092224 | -2.41468  | 0.015749 | 0.028991 |
| 11942 | C18orf22  | 345.5221031 | -0.22269878  | 0.112578 | -1.978173 | 0.047909 | 0.078636 |
| 10088 | ZNF384    | 1265.893521 | -0.22281239  | 0.084999 | -2.621358 | 0.008758 | 0.017017 |
| 11389 | NASP      | 1492.629909 | -0.222849838 | 0.103386 | -2.155508 | 0.031122 | 0.053563 |
| 12017 | MCTS1     | 878.4340331 | -0.222930957 | 0.113951 | -1.956379 | 0.050421 | 0.082239 |
| 12992 | NEU1      | 2742.036545 | -0.222957931 | 0.135377 | -1.646946 | 0.099569 | 0.15022  |
| 16551 | GAPDHS    | 1.680771782 | -0.223051844 | 0.399154 | -0.558811 | 0.576291 | 0.682463 |
| 17215 | C19orf34  | 0.418136621 | -0.223224433 | 0.579831 | -0.384982 | 0.700251 | 0.797259 |
| 15477 | LPAR4     | 6.555228593 | -0.223286607 | 0.257465 | -0.867252 | 0.385804 | 0.488605 |
| 9721  | SETDB1    | 843.8437679 | -0.223299132 | 0.081446 | -2.741699 | 0.006112 | 0.012324 |
| 17180 | ROPN1     | 0.425272442 | -0.223375227 | 0.570107 | -0.391813 | 0.695197 | 0.793193 |
| 17652 | C2orf71   | 0.385899393 | -0.223386356 | 0.800922 | -0.278911 | 0.780313 | 0.866469 |
| 9995  | STX6      | 1077.339247 | -0.2235789   | 0.084242 | -2.654001 | 0.007954 | 0.015599 |
| 17467 | HIST1H2A  | 0.341878619 | -0.223783515 | 0.693194 | -0.32283  | 0.746824 | 0.838066 |
| 17440 | C17orf88  | 0.282867537 | -0.223783547 | 0.67931  | -0.329427 | 0.741833 | 0.833753 |
| 17605 | FAM187B   | 0.243987332 | -0.223783645 | 0.763703 | -0.293024 | 0.769503 | 0.856747 |
| 17690 | CCDC155   | 0.28807768  | -0.223783667 | 0.830114 | -0.269582 | 0.787482 | 0.872551 |
| 17762 | OR7E91P   | 0.305873676 | -0.22378369  | 0.88083  | -0.25406  | 0.799449 | 0.882221 |
| 17645 | OR1J1     | 0.224449129 | -0.223783693 | 0.796889 | -0.280822 | 0.778847 | 0.865185 |
| 17635 | CPLX4     | 0.201608499 | -0.223783706 | 0.791659 | -0.282677 | 0.777424 | 0.864094 |
| 17918 | B3GNT6    | 0.322250013 | -0.223783768 | 0.994935 | -0.224923 | 0.822039 | 0.899252 |
| 17911 | EXD1      | 0.190873887 | -0.223783962 | 0.989949 | -0.226056 | 0.821158 | 0.898639 |
| 17978 | LIPF      | 0.185619361 | -0.223784065 | 1.064662 | -0.210193 | 0.833517 | 0.908765 |
| 18045 | SLC35D3   | 0.170492952 | -0.223784201 | 1.131661 | -0.197748 | 0.843242 | 0.916041 |
| 18185 | KIR3DP1   | 0.314181694 | -0.223784206 | 1.3455   | -0.166321 | 0.867905 | 0.935485 |
| 18044 | RPL29P2   | 0.147330613 | -0.223784239 | 1.132247 | -0.197646 | 0.843322 | 0.916041 |
| 18100 | FBXO47    | 0.148664295 | -0.223784383 | 1.216411 | -0.183971 | 0.854036 | 0.92486  |
| 18245 | SNORA61   | 0.107354566 | -0.223784955 | 1.448434 | -0.154501 | 0.877214 | 0.942411 |
| 18306 | GALR3     | 0.125679146 | -0.223785171 | 1.569061 | -0.142624 | 0.886587 | 0.949306 |
| 18307 | LOC283999 | 0.124135032 | -0.223785176 | 1.571054 | -0.142443 | 0.88673  | 0.94932  |
| 18311 | ADAM5P    | 0.109164171 | -0.223785269 | 1.579918 | -0.141644 | 0.887362 | 0.949876 |
| 18314 | C1orf189  | 0.106918066 | -0.223785277 | 1.58337  | -0.141335 | 0.887605 | 0.950026 |
| 18318 | OR52D1    | 0.105391723 | -0.223785283 | 1.585764 | -0.141121 | 0.887774 | 0.950026 |
| 18316 | GKN2      | 0.104843692 | -0.223785286 | 1.586633 | -0.141044 | 0.887835 | 0.950026 |
| 18390 | SNORA5A   | 0.149764079 | -0.223785436 | 1.709405 | -0.130914 | 0.895843 | 0.954879 |
| 18393 | C20orf186 | 0.126600428 | -0.223785549 | 1.720536 | -0.130067 | 0.896513 | 0.955394 |
| 18413 | GKN1      | 0.08677659  | -0.22378587  | 1.773194 | -0.126205 | 0.89957  | 0.957629 |
| 18412 | C2orf57   | 0.086207165 | -0.223785874 | 1.774532 | -0.12611  | 0.899645 | 0.957629 |
| 18514 | LOC400940 | 0.186031213 | -0.223786183 | 2.070145 | -0.108102 | 0.913915 | 0.967573 |
| 18482 | CPSF4L    | 0.089197681 | -0.223786449 | 1.962896 | -0.114008 | 0.909231 | 0.964281 |
| 18487 | XAGE3     | 0.086532597 | -0.223786472 | 1.970266 | -0.113582 | 0.909569 | 0.964465 |
| 18483 | C3orf51   | 0.08595863  | -0.223786477 | 1.97189  | -0.113488 | 0.909643 | 0.964465 |
| 18485 | TAS1R2    | 0.085910317 | -0.223786478 | 1.972027 | -0.11348  | 0.90965  | 0.964465 |
| 18486 | TSHB      | 0.085905532 | -0.223786478 | 1.972041 | -0.11348  | 0.90965  | 0.964465 |

|       |           |             |              |          |           |          |          |
|-------|-----------|-------------|--------------|----------|-----------|----------|----------|
| 18531 | CCDC83    | 0.108314187 | -0.223786974 | 2.159023 | -0.103652 | 0.917446 | 0.970344 |
| 18561 | SNORA76   | 0.087007841 | -0.223787283 | 2.208043 | -0.101351 | 0.919272 | 0.97078  |
| 18573 | SPINK6    | 0.070418073 | -0.223787634 | 2.263641 | -0.098862 | 0.921248 | 0.972211 |
| 18574 | TECTB     | 0.070262341 | -0.223787637 | 2.264337 | -0.098831 | 0.921272 | 0.972211 |
| 18576 | ACPT      | 0.069386363 | -0.223787652 | 2.268287 | -0.098659 | 0.921409 | 0.972284 |
| 18609 | ZBPB2     | 0.068990888 | -0.223787659 | 2.27009  | -0.098581 | 0.921471 | 0.972284 |
| 18589 | GUCY2F    | 0.067283935 | -0.223787689 | 2.278025 | -0.098238 | 0.921744 | 0.972284 |
| 18601 | PRKAG3    | 0.064982544 | -0.223787732 | 2.289129 | -0.097761 | 0.922122 | 0.972284 |
| 18632 | PRR23C    | 0.102519349 | -0.223788081 | 2.463238 | -0.090851 | 0.927611 | 0.975853 |
| 18639 | KLK12     | 0.090867564 | -0.223788385 | 2.494936 | -0.089697 | 0.928528 | 0.976451 |
| 18641 | AADACL2   | 0.085667502 | -0.223788452 | 2.511343 | -0.089111 | 0.928994 | 0.976665 |
| 18656 | FGF22     | 0.070463549 | -0.223788921 | 2.578056 | -0.086805 | 0.930826 | 0.977976 |
| 18657 | LOC646498 | 0.068307048 | -0.223788975 | 2.590444 | -0.08639  | 0.931156 | 0.978271 |
| 18658 | REG1P     | 0.067015029 | -0.223789008 | 2.598106 | -0.086135 | 0.931359 | 0.978431 |
| 18727 | NLRP5     | 0.085346089 | -0.223790172 | 2.900648 | -0.077152 | 0.938503 | 0.981752 |
| 18718 | GPR151    | 0.084180496 | -0.223790189 | 2.904211 | -0.077057 | 0.938578 | 0.981752 |
| 18734 | SERPINB1C | 0.068803593 | -0.22379048  | 2.91407  | -0.076797 | 0.938785 | 0.981752 |
| 18721 | DC1001302 | 0.069709059 | -0.22379048  | 2.91407  | -0.076797 | 0.938785 | 0.981752 |
| 18738 | SPANXN2   | 0.064809932 | -0.22379048  | 2.91407  | -0.076797 | 0.938785 | 0.981752 |
| 18719 | KLK9      | 0.065673168 | -0.22379048  | 2.91407  | -0.076797 | 0.938785 | 0.981752 |
| 18729 | OR51I2    | 0.04716576  | -0.223790726 | 2.91407  | -0.076797 | 0.938785 | 0.981752 |
| 18713 | BPIL2     | 0.049930771 | -0.223790726 | 2.91407  | -0.076797 | 0.938785 | 0.981752 |
| 18720 | LDLRAD1   | 0.050587061 | -0.223790726 | 2.91407  | -0.076797 | 0.938785 | 0.981752 |
| 18723 | LOC730811 | 0.048223874 | -0.223790726 | 2.91407  | -0.076797 | 0.938785 | 0.981752 |
| 18724 | LOC731779 | 0.047468465 | -0.223790726 | 2.91407  | -0.076797 | 0.938785 | 0.981752 |
| 18730 | PAGE4     | 0.049120584 | -0.223790726 | 2.91407  | -0.076797 | 0.938785 | 0.981752 |
| 18733 | PPP1R3A   | 0.043777559 | -0.223790726 | 2.91407  | -0.076797 | 0.938785 | 0.981752 |
| 18735 | SNORA71E  | 0.047995435 | -0.223790726 | 2.91407  | -0.076797 | 0.938785 | 0.981752 |
| 18736 | SNORA75   | 0.048812734 | -0.223790726 | 2.91407  | -0.076797 | 0.938785 | 0.981752 |
| 18740 | SPRR4     | 0.048875972 | -0.223790726 | 2.91407  | -0.076797 | 0.938785 | 0.981752 |
| 18743 | USP17     | 0.045035842 | -0.223790726 | 2.91407  | -0.076797 | 0.938785 | 0.981752 |
| 18744 | WFDC10A   | 0.046454044 | -0.223790726 | 2.91407  | -0.076797 | 0.938785 | 0.981752 |
| 18745 | XAGE5     | 0.04835227  | -0.223790726 | 2.91407  | -0.076797 | 0.938785 | 0.981752 |
| 18714 | CDRT15    | 0.049358278 | -0.223790726 | 2.91407  | -0.076797 | 0.938785 | 0.981752 |
| 18715 | DYTN      | 0.046071426 | -0.223790726 | 2.91407  | -0.076797 | 0.938785 | 0.981752 |
| 18717 | FAM47B    | 0.045029058 | -0.223790726 | 2.91407  | -0.076797 | 0.938785 | 0.981752 |
| 18728 | OR10A5    | 0.045865141 | -0.223790726 | 2.91407  | -0.076797 | 0.938785 | 0.981752 |
| 18737 | SNORA9    | 0.048631934 | -0.223790726 | 2.91407  | -0.076797 | 0.938785 | 0.981752 |
| 18739 | SPRR2B    | 0.047906644 | -0.223790726 | 2.91407  | -0.076797 | 0.938785 | 0.981752 |
| 10059 | MAGOH     | 416.9267088 | -0.224016402 | 0.085086 | -2.632832 | 0.008468 | 0.016498 |
| 14287 | ICAM2     | 714.4162313 | -0.224155128 | 0.181728 | -1.233464 | 0.217403 | 0.298265 |
| 17206 | GH1       | 0.47859049  | -0.224160499 | 0.58025  | -0.386317 | 0.699262 | 0.796596 |
| 13395 | BRI3BP    | 87.08660265 | -0.224253756 | 0.148251 | -1.512661 | 0.130366 | 0.190765 |
| 14046 | ENO1      | 56158.12661 | -0.224414821 | 0.172335 | -1.302198 | 0.192849 | 0.2691   |
| 9421  | TRAPPC3   | 1006.980944 | -0.224570638 | 0.078782 | -2.850532 | 0.004365 | 0.009081 |
| 10696 | HMGNI     | 2076.290806 | -0.224594053 | 0.093618 | -2.399052 | 0.016438 | 0.030123 |
| 13905 | NIT2      | 1580.632237 | -0.224654931 | 0.166659 | -1.347993 | 0.177661 | 0.250433 |

|       |           |             |              |          |           |          |          |
|-------|-----------|-------------|--------------|----------|-----------|----------|----------|
| 12978 | LOC284025 | 126.7338488 | -0.225018345 | 0.136335 | -1.650477 | 0.098845 | 0.149286 |
| 13401 | SGK269    | 1485.194216 | -0.225292062 | 0.149015 | -1.511878 | 0.130565 | 0.190971 |
| 10809 | MEN1      | 697.7181915 | -0.225307085 | 0.095513 | -2.358907 | 0.018329 | 0.033237 |
| 11749 | SEC61B    | 1422.42884  | -0.225456461 | 0.11067  | -2.037188 | 0.041631 | 0.069454 |
| 14589 | MET       | 9072.516523 | -0.225521864 | 0.197886 | -1.139656 | 0.25443  | 0.341838 |
| 14593 | DBN1      | 1520.924249 | -0.225539064 | 0.198101 | -1.138503 | 0.254911 | 0.34239  |
| 17352 | ADAMTS20  | 1.589197263 | -0.225685973 | 0.64095  | -0.352112 | 0.724755 | 0.81869  |
| 15976 | KIR3DL1   | 4.871321193 | -0.22569592  | 0.313745 | -0.719362 | 0.471918 | 0.578998 |
| 11970 | SNRPE     | 698.3172149 | -0.226157705 | 0.114881 | -1.968628 | 0.048996 | 0.080231 |
| 11539 | RBM10     | 1107.372398 | -0.226170611 | 0.10753  | -2.103322 | 0.035438 | 0.060197 |
| 15296 | C20orf197 | 8.698257231 | -0.226320234 | 0.245519 | -0.921802 | 0.356632 | 0.457005 |
| 15908 | B3GAT1    | 37.65628949 | -0.226638921 | 0.306004 | -0.740641 | 0.458911 | 0.565446 |
| 14247 | SH2D3C    | 772.4510427 | -0.22667     | 0.182343 | -1.243097 | 0.213832 | 0.29419  |
| 13614 | NUAK1     | 536.0288164 | -0.226695489 | 0.156181 | -1.451493 | 0.146643 | 0.211131 |
| 11251 | EDEM1     | 1494.734586 | -0.226714335 | 0.103048 | -2.200077 | 0.027801 | 0.048436 |
| 10692 | COMMD9    | 944.8563856 | -0.226962854 | 0.094585 | -2.39956  | 0.016415 | 0.030092 |
| 11453 | TRIT1     | 351.3864339 | -0.227356174 | 0.106555 | -2.133704 | 0.032867 | 0.05625  |
| 12759 | FNDC3B    | 4118.438609 | -0.228152994 | 0.132954 | -1.716032 | 0.086156 | 0.132365 |
| 10603 | H3F3B     | 9310.274515 | -0.228217722 | 0.093717 | -2.435179 | 0.014884 | 0.027513 |
| 14250 | LAMA5     | 4120.699598 | -0.228716931 | 0.184129 | -1.242157 | 0.214179 | 0.294604 |
| 13254 | MGC70857  | 415.2668734 | -0.228757072 | 0.14641  | -1.562437 | 0.118185 | 0.174781 |
| 14656 | CELSR1    | 2130.279762 | -0.228874635 | 0.205341 | -1.114609 | 0.265018 | 0.354412 |
| 11232 | QSOX2     | 509.3052191 | -0.228898337 | 0.103715 | -2.206984 | 0.027315 | 0.047668 |
| 12894 | MXD4      | 1961.469794 | -0.229191715 | 0.136891 | -1.674261 | 0.094079 | 0.143016 |
| 11950 | DYNLT1    | 1329.800618 | -0.229206706 | 0.116067 | -1.97478  | 0.048293 | 0.079213 |
| 16840 | LOC91149  | 0.722636055 | -0.229231916 | 0.477507 | -0.48006  | 0.631185 | 0.734671 |
| 10138 | STT3A     | 3373.583171 | -0.229395631 | 0.088143 | -2.602541 | 0.009254 | 0.01789  |
| 12754 | NCK2      | 1403.642951 | -0.229466715 | 0.133649 | -1.716939 | 0.08599  | 0.132154 |
| 16776 | DNAJB3    | 3.434675535 | -0.229549734 | 0.461683 | -0.497202 | 0.619046 | 0.723291 |
| 14517 | SAMD9     | 697.6822086 | -0.229567333 | 0.197673 | -1.161348 | 0.245501 | 0.331484 |
| 14918 | DFNB31    | 215.9044302 | -0.22957591  | 0.222557 | -1.031536 | 0.30229  | 0.397183 |
| 9860  | PRMT2     | 1898.97807  | -0.229656869 | 0.085036 | -2.700686 | 0.00692  | 0.013756 |
| 16631 | OR2A25    | 0.769014192 | -0.229679529 | 0.424645 | -0.540874 | 0.588594 | 0.693707 |
| 13283 | PIP4K2A   | 1246.153431 | -0.229849286 | 0.148362 | -1.549248 | 0.121322 | 0.179028 |
| 11299 | WASF2     | 3960.883456 | -0.229967137 | 0.105569 | -2.178366 | 0.029379 | 0.050965 |
| 15161 | ACE       | 1150.552119 | -0.230189934 | 0.240356 | -0.957704 | 0.338212 | 0.437258 |
| 10735 | IDI2      | 39.92129477 | -0.230222406 | 0.096507 | -2.38554  | 0.017054 | 0.031139 |
| 14351 | NPR2      | 348.9210046 | -0.230244841 | 0.189832 | -1.212885 | 0.225174 | 0.307562 |
| 13822 | RPGRIPL   | 277.0559236 | -0.230255261 | 0.167015 | -1.378647 | 0.168003 | 0.238246 |
| 12211 | MYH9      | 27521.62051 | -0.23034629  | 0.121712 | -1.892553 | 0.058417 | 0.093771 |
| 15963 | ABI3BP    | 1822.193341 | -0.230348174 | 0.318164 | -0.723991 | 0.469071 | 0.575973 |
| 13704 | C4orf21   | 60.82335615 | -0.230364577 | 0.162568 | -1.417032 | 0.156474 | 0.223806 |
| 15706 | CCDC17    | 10.64400444 | -0.230388423 | 0.286694 | -0.803604 | 0.421626 | 0.526187 |
| 13231 | BTG1      | 6293.568615 | -0.230434915 | 0.146738 | -1.570387 | 0.116325 | 0.172329 |
| 12175 | HPS5      | 696.8953217 | -0.230549041 | 0.121061 | -1.904398 | 0.056858 | 0.091539 |
| 13484 | FBXL18    | 296.7116506 | -0.230561612 | 0.154477 | -1.49253  | 0.13556  | 0.197057 |
| 12947 | TTPAL     | 501.0263609 | -0.230652962 | 0.139021 | -1.659126 | 0.09709  | 0.146989 |

|       |          |             |              |          |           |          |          |
|-------|----------|-------------|--------------|----------|-----------|----------|----------|
| 12234 | PMS2CL   | 104.1530863 | -0.230750452 | 0.12231  | -1.886609 | 0.059213 | 0.094869 |
| 12458 | FIS1     | 1792.553635 | -0.230839555 | 0.1271   | -1.816208 | 0.069338 | 0.109095 |
| 10871 | SIRT2    | 1345.078427 | -0.230848699 | 0.098983 | -2.332216 | 0.019689 | 0.035501 |
| 13063 | IFNGR1   | 2449.046106 | -0.230901944 | 0.142103 | -1.624887 | 0.104187 | 0.156332 |
| 10352 | PGAP2    | 397.619521  | -0.231046102 | 0.091404 | -2.527746 | 0.01148  | 0.021736 |
| 14790 | CFI      | 3093.749155 | -0.231125406 | 0.215839 | -1.070824 | 0.284249 | 0.376686 |
| 12077 | TCTN2    | 739.3294455 | -0.23155286  | 0.119637 | -1.935454 | 0.052935 | 0.085913 |
| 11593 | GPS2     | 993.7286582 | -0.231626117 | 0.111217 | -2.082644 | 0.037284 | 0.063038 |
| 10375 | ABCF2    | 1227.331484 | -0.231637251 | 0.092123 | -2.514446 | 0.011922 | 0.022524 |
| 14238 | PSPH     | 400.2694158 | -0.231667997 | 0.186038 | -1.245271 | 0.213032 | 0.293274 |
| 12563 | SRI      | 2103.78464  | -0.231732731 | 0.129896 | -1.783986 | 0.074426 | 0.116116 |
| 8930  | C1orf174 | 359.8776917 | -0.232003009 | 0.076286 | -3.041236 | 0.002356 | 0.005172 |
| 14061 | AGPAT4   | 253.7214121 | -0.232023996 | 0.178632 | -1.298891 | 0.193981 | 0.270409 |
| 15370 | DCLK3    | 21.30167536 | -0.23238492  | 0.258418 | -0.89926  | 0.368514 | 0.469958 |
| 16578 | BAAT     | 35.91758    | -0.232436975 | 0.42078  | -0.552396 | 0.580677 | 0.686564 |
| 9369  | DPAGT1   | 782.6216982 | -0.232505925 | 0.080937 | -2.872684 | 0.00407  | 0.008514 |
| 14794 | SIGLEC16 | 9.987110771 | -0.232526321 | 0.217742 | -1.067898 | 0.285566 | 0.378355 |
| 12906 | FBXW9    | 158.7500485 | -0.232710751 | 0.139217 | -1.671569 | 0.094609 | 0.143688 |
| 10845 | HMGXB3   | 1488.528509 | -0.233259872 | 0.099611 | -2.341708 | 0.019196 | 0.034694 |
| 12152 | DMWD     | 478.3156479 | -0.233464371 | 0.122229 | -1.91005  | 0.056127 | 0.090524 |
| 11563 | FARSA    | 1000.819089 | -0.23361645  | 0.111605 | -2.093238 | 0.036328 | 0.061581 |
| 14495 | PTRH1    | 126.590887  | -0.23376733  | 0.199924 | -1.169282 | 0.24229  | 0.327616 |
| 15366 | MAMSTR   | 19.20450892 | -0.233816808 | 0.259678 | -0.900409 | 0.367903 | 0.4693   |
| 13962 | POLR3G   | 44.84501099 | -0.233868746 | 0.175738 | -1.330783 | 0.18326  | 0.257258 |
| 13161 | RINL     | 330.227871  | -0.233948875 | 0.147013 | -1.591353 | 0.11153  | 0.166105 |
| 17025 | FKBP6    | 0.550834233 | -0.234206253 | 0.53772  | -0.435554 | 0.66316  | 0.763501 |
| 15069 | ZNF334   | 163.9976173 | -0.234373421 | 0.237744 | -0.985823 | 0.32422  | 0.421729 |
| 11609 | TRIM3    | 203.4725931 | -0.234465106 | 0.11279  | -2.078771 | 0.037638 | 0.06355  |
| 15586 | SLC7A5P2 | 5.148193436 | -0.234654539 | 0.279619 | -0.839193 | 0.401361 | 0.504753 |
| 14499 | PDE1B    | 355.9406661 | -0.234720705 | 0.200898 | -1.168355 | 0.242663 | 0.328063 |
| 12886 | DHODH    | 216.1107851 | -0.234864944 | 0.13997  | -1.677962 | 0.093355 | 0.142002 |
| 15829 | SHANK1   | 5.488566495 | -0.235149307 | 0.306724 | -0.766647 | 0.443292 | 0.548926 |
| 15301 | SUSD2    | 547.7941133 | -0.235654055 | 0.255988 | -0.920568 | 0.357276 | 0.45768  |
| 11342 | LCMT1    | 669.7632739 | -0.235696744 | 0.108705 | -2.168223 | 0.030142 | 0.05209  |
| 11488 | ATG12    | 602.0479121 | -0.235820748 | 0.110989 | -2.124719 | 0.03361  | 0.057346 |
| 11499 | UBE2MP1  | 85.64833742 | -0.236073006 | 0.111456 | -2.118078 | 0.034168 | 0.058243 |
| 16917 | GUCA2B   | 27.25689823 | -0.236140025 | 0.513454 | -0.459905 | 0.645584 | 0.748011 |
| 10967 | TMEM18   | 709.6757033 | -0.236151466 | 0.102766 | -2.297953 | 0.021564 | 0.038542 |
| 10734 | CCDC123  | 464.3970334 | -0.236232441 | 0.099018 | -2.385761 | 0.017044 | 0.031123 |
| 7480  | TRPC4AP  | 2021.717698 | -0.236317446 | 0.065228 | -3.622927 | 0.000291 | 0.000763 |
| 14905 | SP6      | 47.66449092 | -0.236383386 | 0.228538 | -1.034329 | 0.300982 | 0.39581  |
| 10458 | DUSP28   | 85.47202183 | -0.236504815 | 0.09499  | -2.489774 | 0.012782 | 0.023958 |
| 14416 | HEXDC    | 338.2629927 | -0.236701451 | 0.198372 | -1.193217 | 0.232784 | 0.316488 |
| 10968 | ZNF71    | 168.1454301 | -0.237252401 | 0.103264 | -2.297524 | 0.021589 | 0.038582 |
| 11911 | SRPRB    | 1446.538844 | -0.237331905 | 0.11958  | -1.984707 | 0.047177 | 0.077636 |
| 14932 | RIMS3    | 89.24430547 | -0.237374553 | 0.231427 | -1.025697 | 0.305034 | 0.400425 |
| 11644 | HMG2     | 4299.179125 | -0.237415072 | 0.115089 | -2.062876 | 0.039124 | 0.06586  |

|       |           |             |              |          |           |          |          |
|-------|-----------|-------------|--------------|----------|-----------|----------|----------|
| 15725 | MAOA      | 2994.646643 | -0.237503123 | 0.298128 | -0.796648 | 0.425655 | 0.530574 |
| 10240 | C1orf128  | 779.6854331 | -0.237532106 | 0.092429 | -2.569881 | 0.010173 | 0.019473 |
| 13717 | NDOR1     | 367.0283942 | -0.237536605 | 0.168129 | -1.412825 | 0.157707 | 0.225357 |
| 10357 | OTUD5     | 1472.983016 | -0.237665928 | 0.094161 | -2.524048 | 0.011601 | 0.021956 |
| 14715 | EBF1      | 539.8465163 | -0.237966951 | 0.217753 | -1.092829 | 0.274469 | 0.365604 |
| 13719 | STK17A    | 856.4868477 | -0.237973319 | 0.168536 | -1.412006 | 0.157948 | 0.225668 |
| 13558 | ENAH      | 1381.181259 | -0.238074162 | 0.16214  | -1.468323 | 0.142016 | 0.205315 |
| 11534 | C16orf53  | 812.8262055 | -0.238154154 | 0.113118 | -2.105364 | 0.03526  | 0.059921 |
| 14404 | RAMP2     | 807.7199828 | -0.238219099 | 0.199034 | -1.196878 | 0.231354 | 0.314827 |
| 16093 | SELE      | 102.5914699 | -0.238275949 | 0.348726 | -0.683275 | 0.494433 | 0.602211 |
| 11168 | C12orf73  | 154.2589237 | -0.238366037 | 0.10678  | -2.232302 | 0.025595 | 0.04492  |
| 11947 | ESYT2     | 4528.962879 | -0.23842264  | 0.120679 | -1.97568  | 0.048191 | 0.079065 |
| 10528 | SMN2      | 891.3220835 | -0.238521028 | 0.096935 | -2.460629 | 0.013869 | 0.025822 |
| 10503 | PIPSL     | 125.8231662 | -0.238581304 | 0.096585 | -2.470179 | 0.013505 | 0.025203 |
| 10498 | CNOT3     | 796.4149639 | -0.238698916 | 0.09657  | -2.471765 | 0.013445 | 0.025103 |
| 15317 | C20orf107 | 2.22175048  | -0.238937081 | 0.260709 | -0.916489 | 0.359411 | 0.459934 |
| 14820 | TRIB1     | 1607.621605 | -0.239047053 | 0.22578  | -1.058763 | 0.289708 | 0.383169 |
| 17490 | GPR87     | 1.980314691 | -0.239171628 | 0.75522  | -0.316691 | 0.751478 | 0.842179 |
| 12375 | MGRN1     | 2735.647413 | -0.239225688 | 0.129812 | -1.84286  | 0.06535  | 0.103502 |
| 11111 | ANP32B    | 2540.278208 | -0.239249799 | 0.106365 | -2.249323 | 0.024492 | 0.043208 |
| 12452 | HDDC3     | 328.3980635 | -0.239494532 | 0.131629 | -1.819472 | 0.068839 | 0.108353 |
| 14840 | ARHGAP3   | 191.472605  | -0.239800722 | 0.227418 | -1.054447 | 0.291678 | 0.385255 |
| 11852 | IL17RA    | 316.8557614 | -0.239874813 | 0.119601 | -2.005628 | 0.044896 | 0.074249 |
| 16440 | CA8       | 59.57636518 | -0.240255221 | 0.406719 | -0.590716 | 0.554711 | 0.661368 |
| 11906 | GNPTG     | 1638.98158  | -0.240560874 | 0.121161 | -1.985468 | 0.047092 | 0.077523 |
| 11464 | C20orf3   | 2864.41766  | -0.240766142 | 0.113028 | -2.13015  | 0.033159 | 0.056695 |
| 13343 | WDR67     | 131.1846457 | -0.240766535 | 0.157266 | -1.530946 | 0.125783 | 0.184776 |
| 15803 | PCDHB11   | 109.3581541 | -0.240938446 | 0.310986 | -0.774756 | 0.438484 | 0.543866 |
| 9622  | ARF1      | 10211.99115 | -0.240946562 | 0.086925 | -2.77188  | 0.005573 | 0.011354 |
| 13264 | 44080     | 896.5180707 | -0.241162151 | 0.154753 | -1.558365 | 0.119147 | 0.17607  |
| 13515 | TMEM70    | 669.1289698 | -0.241218839 | 0.162698 | -1.482615 | 0.138177 | 0.2004   |
| 15977 | LHFPL1    | 1.712237086 | -0.241371685 | 0.335591 | -0.719243 | 0.471991 | 0.579051 |
| 15190 | KCNK13    | 47.42043981 | -0.241624607 | 0.254065 | -0.951036 | 0.341586 | 0.44075  |
| 11189 | AKAP8     | 915.7931727 | -0.241719957 | 0.108633 | -2.225113 | 0.026074 | 0.045676 |
| 11470 | ZRSR2     | 262.8640969 | -0.241721867 | 0.113553 | -2.128715 | 0.033278 | 0.056868 |
| 12892 | TIMM8B    | 621.8439393 | -0.241813936 | 0.144321 | -1.675526 | 0.093831 | 0.142661 |
| 10390 | PSMD9     | 925.0759346 | -0.24205573  | 0.09643  | -2.510164 | 0.012067 | 0.022766 |
| 14136 | CD302     | 996.0918729 | -0.242143313 | 0.189647 | -1.276813 | 0.201668 | 0.279634 |
| 13596 | NMI       | 565.3620544 | -0.242155144 | 0.166203 | -1.456986 | 0.14512  | 0.209216 |
| 13432 | TRIP10    | 1377.307712 | -0.242277921 | 0.161016 | -1.504686 | 0.132405 | 0.193215 |
| 12266 | PPA1      | 1966.007495 | -0.242293911 | 0.129002 | -1.87822  | 0.060351 | 0.096441 |
| 12045 | H3F3C     | 255.3405837 | -0.24233998  | 0.124561 | -1.945554 | 0.051708 | 0.084139 |
| 10378 | RPA2      | 910.4680193 | -0.242468462 | 0.096492 | -2.512841 | 0.011976 | 0.02262  |
| 10581 | GTF2F1    | 1796.158601 | -0.242550154 | 0.099335 | -2.441751 | 0.014616 | 0.027076 |
| 15062 | TRPC4     | 64.03030215 | -0.242687771 | 0.245831 | -0.987212 | 0.323539 | 0.421039 |
| 16036 | NGEF      | 215.1421859 | -0.242764729 | 0.346562 | -0.700494 | 0.483619 | 0.591133 |
| 15879 | ACSBG2    | 3.317157027 | -0.242839117 | 0.324177 | -0.749094 | 0.453801 | 0.560171 |

|       |          |             |              |          |           |          |          |
|-------|----------|-------------|--------------|----------|-----------|----------|----------|
| 13637 | SESN2    | 622.6345256 | -0.243171718 | 0.168554 | -1.442692 | 0.149107 | 0.214318 |
| 14668 | SGCE     | 774.2659584 | -0.243291264 | 0.218947 | -1.111188 | 0.266487 | 0.35613  |
| 16754 | TULP2    | 0.742823906 | -0.243441117 | 0.483112 | -0.503902 | 0.61433  | 0.718723 |
| 11607 | IFT172   | 576.4806152 | -0.24364344  | 0.117187 | -2.079101 | 0.037608 | 0.06351  |
| 12131 | PABPN1   | 2189.466205 | -0.243822097 | 0.127136 | -1.917807 | 0.055135 | 0.089087 |
| 9377  | RER1     | 2686.683566 | -0.243822098 | 0.084949 | -2.870233 | 0.004102 | 0.008574 |
| 12430 | C9orf30  | 388.7007334 | -0.244128227 | 0.133626 | -1.826958 | 0.067706 | 0.106767 |
| 11840 | HPS1     | 1452.52281  | -0.244203879 | 0.121582 | -2.008558 | 0.044584 | 0.073808 |
| 8979  | UBE2L3   | 1934.806503 | -0.244244518 | 0.080858 | -3.020645 | 0.002522 | 0.005506 |
| 13398 | ZNF286B  | 20.31949448 | -0.244503427 | 0.161666 | -1.512401 | 0.130432 | 0.190819 |
| 14265 | NHEDC2   | 127.327934  | -0.244620907 | 0.197432 | -1.239012 | 0.215341 | 0.295892 |
| 14335 | COX4I1   | 7404.799985 | -0.244662901 | 0.200591 | -1.219713 | 0.222574 | 0.304337 |
| 15696 | TAS2R10  | 1.668989185 | -0.244678497 | 0.302842 | -0.80794  | 0.419125 | 0.523399 |
| 14241 | TTN      | 173.1670919 | -0.244713192 | 0.196701 | -1.24409  | 0.213467 | 0.293811 |
| 11187 | ALG1     | 678.7865007 | -0.244832523 | 0.110017 | -2.225412 | 0.026054 | 0.045649 |
| 11801 | BTBD12   | 203.1764516 | -0.244901568 | 0.121209 | -2.020494 | 0.043332 | 0.071973 |
| 11422 | DVL2     | 538.3885976 | -0.244941687 | 0.114384 | -2.141395 | 0.032242 | 0.05533  |
| 7828  | CDC123   | 793.5882206 | -0.244945971 | 0.070171 | -3.490684 | 0.000482 | 0.001206 |
| 9689  | 44082    | 1939.279635 | -0.244953229 | 0.089092 | -2.749439 | 0.00597  | 0.012077 |
| 12117 | BOD1     | 1005.518071 | -0.244961106 | 0.127376 | -1.923136 | 0.054463 | 0.088102 |
| 16156 | SYT13    | 2696.001029 | -0.24499978  | 0.368704 | -0.66449  | 0.506377 | 0.614388 |
| 12837 | DEAF1    | 747.1810838 | -0.245044573 | 0.144718 | -1.69325  | 0.090408 | 0.138045 |
| 10266 | DIABLO   | 1041.678455 | -0.245241079 | 0.095843 | -2.558771 | 0.010504 | 0.020056 |
| 17533 | CPB2     | 2.004768563 | -0.245288312 | 0.798236 | -0.307288 | 0.758624 | 0.848103 |
| 17188 | TYRP1    | 3.514448882 | -0.245633158 | 0.630076 | -0.389847 | 0.69665  | 0.794452 |
| 15393 | CCL14    | 497.8237703 | -0.245686929 | 0.275485 | -0.891835 | 0.372482 | 0.474307 |
| 15249 | HKB-CPT1 | 454.6636302 | -0.245920618 | 0.263533 | -0.933167 | 0.350734 | 0.450832 |
| 14693 | KIAA1683 | 84.04044359 | -0.246083306 | 0.223225 | -1.102401 | 0.270288 | 0.360573 |
| 14544 | NECAB3   | 412.4686164 | -0.246104062 | 0.213498 | -1.152725 | 0.249023 | 0.33561  |
| 14831 | UNC45B   | 5.221541595 | -0.24619375  | 0.23288  | -1.057168 | 0.290435 | 0.383852 |
| 15320 | C6orf52  | 3.356613738 | -0.246316865 | 0.269124 | -0.915255 | 0.360058 | 0.460672 |
| 14328 | FAM105A  | 419.302794  | -0.246533321 | 0.20169  | -1.222335 | 0.221581 | 0.303127 |
| 12103 | CSNK1D   | 3123.138141 | -0.246561304 | 0.127867 | -1.92826  | 0.053823 | 0.087167 |
| 14620 | AGAP5    | 38.16211286 | -0.246637265 | 0.218901 | -1.126707 | 0.259866 | 0.348402 |
| 11722 | SF4      | 512.0817578 | -0.246738499 | 0.120613 | -2.045711 | 0.040785 | 0.068199 |
| 14381 | PERP     | 2911.959216 | -0.246748806 | 0.205151 | -1.202767 | 0.229066 | 0.312213 |
| 12936 | PRKX     | 702.2368033 | -0.247059933 | 0.148517 | -1.663515 | 0.096209 | 0.145779 |
| 12385 | TXNL4A   | 857.1853204 | -0.247297784 | 0.134348 | -1.840723 | 0.065662 | 0.10392  |
| 10794 | CDK7     | 542.6221973 | -0.247623413 | 0.10476  | -2.363722 | 0.018092 | 0.032854 |
| 9568  | SETD8    | 564.4815809 | -0.247811611 | 0.088724 | -2.793046 | 0.005221 | 0.010696 |
| 16429 | KLC3     | 33.60551881 | -0.247839664 | 0.415719 | -0.596172 | 0.55106  | 0.657456 |
| 9818  | CDIPT    | 2391.693855 | -0.24785398  | 0.091414 | -2.711343 | 0.006701 | 0.013378 |
| 15689 | CITED1   | 4.144637708 | -0.247906952 | 0.305842 | -0.810573 | 0.417611 | 0.521741 |
| 8986  | IK       | 2140.888531 | -0.248103655 | 0.082175 | -3.0192   | 0.002534 | 0.005528 |
| 14157 | ARL10    | 77.14303539 | -0.248355703 | 0.195763 | -1.268653 | 0.204565 | 0.283229 |
| 10555 | C7orf30  | 462.1540539 | -0.248361313 | 0.101329 | -2.451048 | 0.014244 | 0.026452 |
| 9567  | RUVBL1   | 730.9441982 | -0.248657136 | 0.089011 | -2.793544 | 0.005213 | 0.010681 |



|       |           |             |              |          |           |          |          |
|-------|-----------|-------------|--------------|----------|-----------|----------|----------|
| 12652 | IDH3G     | 1135.972869 | -0.248677181 | 0.141582 | -1.756414 | 0.079018 | 0.122417 |
| 12749 | FLJ35220  | 289.9421714 | -0.248741665 | 0.144734 | -1.718617 | 0.085684 | 0.131735 |
| 11166 | MED30     | 125.4502673 | -0.248798014 | 0.111429 | -2.2328   | 0.025562 | 0.044872 |
| 14500 | ERO1L     | 2002.562089 | -0.24885752  | 0.213112 | -1.167731 | 0.242915 | 0.328371 |
| 11805 | CDR2      | 973.7573104 | -0.249026449 | 0.123313 | -2.019459 | 0.04344  | 0.072127 |
| 14997 | LPAL2     | 5.93602637  | -0.249191471 | 0.247265 | -1.007792 | 0.313554 | 0.409814 |
| 9981  | MARK4     | 758.6224291 | -0.249256563 | 0.093758 | -2.658513 | 0.007849 | 0.015413 |
| 16048 | PADI4     | 4.748004059 | -0.249344527 | 0.357277 | -0.697902 | 0.485238 | 0.592669 |
| 14160 | SLC4A7    | 863.2118762 | -0.249462345 | 0.196777 | -1.267743 | 0.20489  | 0.283619 |
| 11026 | DRAM2     | 1153.949074 | -0.249507597 | 0.109379 | -2.281137 | 0.02254  | 0.04007  |
| 13073 | TECR      | 1601.68319  | -0.249634063 | 0.153922 | -1.621818 | 0.104842 | 0.157195 |
| 11997 | DALRD3    | 539.4374736 | -0.249717889 | 0.127302 | -1.961622 | 0.049807 | 0.081375 |
| 13526 | 729991-ME | 41.79333737 | -0.250010418 | 0.169042 | -1.478983 | 0.139145 | 0.201625 |
| 15545 | NAP1L3    | 63.88952977 | -0.250011458 | 0.295142 | -0.847089 | 0.396946 | 0.500517 |
| 14940 | TSSK3     | 26.77349643 | -0.250067772 | 0.244109 | -1.02441  | 0.305642 | 0.401055 |
| 12296 | DDR3GK1   | 1106.090225 | -0.250080713 | 0.133963 | -1.866793 | 0.06193  | 0.098723 |
| 15655 | GPR83     | 6.365214286 | -0.250170333 | 0.304803 | -0.820761 | 0.411783 | 0.515576 |
| 15330 | LOC90586  | 3.874749734 | -0.250801038 | 0.275456 | -0.910495 | 0.362562 | 0.463573 |
| 10474 | UBL4A     | 1076.310617 | -0.250928053 | 0.101034 | -2.483612 | 0.013006 | 0.024339 |
| 15589 | COL11A2   | 20.75521101 | -0.25106747  | 0.299501 | -0.838286 | 0.40187  | 0.505296 |
| 10749 | DNPEP     | 1458.7981   | -0.251196637 | 0.105499 | -2.381041 | 0.017264 | 0.031481 |
| 14812 | MEM176E   | 10751.62806 | -0.251279729 | 0.236831 | -1.061009 | 0.288686 | 0.382023 |
| 14681 | SLC6A1    | 145.6761813 | -0.251343451 | 0.226898 | -1.107736 | 0.267976 | 0.357782 |
| 13288 | ATP5I     | 1619.661458 | -0.251381357 | 0.162517 | -1.546799 | 0.121912 | 0.179831 |
| 10282 | PHF20     | 988.63259   | -0.251400339 | 0.098507 | -2.552095 | 0.010708 | 0.020413 |
| 13624 | ITGB7     | 425.0715004 | -0.251527729 | 0.173758 | -1.447576 | 0.147736 | 0.212549 |
| 11793 | RILPL2    | 556.1660886 | -0.251597936 | 0.124309 | -2.023976 | 0.042973 | 0.071424 |
| 12723 | C19orf63  | 3223.196665 | -0.251783747 | 0.145966 | -1.724944 | 0.084538 | 0.130238 |
| 13909 | LOC219347 | 41.42320837 | -0.251879142 | 0.186915 | -1.34756  | 0.1778   | 0.250561 |
| 13160 | MLKL      | 431.4620949 | -0.251941444 | 0.15829  | -1.591647 | 0.111464 | 0.166019 |
| 11662 | PIK3R2    | 1368.461568 | -0.251984256 | 0.1224   | -2.058702 | 0.039523 | 0.066417 |
| 13349 | SACS      | 646.5297679 | -0.252144053 | 0.164909 | -1.528986 | 0.126268 | 0.185406 |
| 9562  | C19orf62  | 1082.625027 | -0.252219222 | 0.09021  | -2.795916 | 0.005175 | 0.010609 |
| 14650 | SEC1      | 4.632809629 | -0.252350999 | 0.225892 | -1.117134 | 0.263937 | 0.353135 |
| 11765 | TTLL1     | 149.7796415 | -0.25238403  | 0.12423  | -2.031594 | 0.042195 | 0.070298 |
| 10083 | CCT3      | 4465.48378  | -0.252403213 | 0.096187 | -2.62409  | 0.008688 | 0.016889 |
| 9629  | PSMA1     | 2429.028686 | -0.252418952 | 0.09115  | -2.769282 | 0.005618 | 0.011437 |
| 16374 | DSCAM     | 3.914732923 | -0.252674396 | 0.41607  | -0.607288 | 0.54366  | 0.650805 |
| 10221 | ZNF565    | 59.55830482 | -0.252735973 | 0.098194 | -2.573838 | 0.010058 | 0.019288 |
| 15150 | CITED4    | 452.190135  | -0.252776065 | 0.263482 | -0.959368 | 0.337374 | 0.436492 |
| 11404 | URM1      | 1112.904889 | -0.252889217 | 0.117739 | -2.147874 | 0.031724 | 0.054526 |
| 13994 | GLYCTK    | 290.8162763 | -0.252951414 | 0.191676 | -1.319681 | 0.186942 | 0.261825 |
| 11507 | HIRIP3    | 484.7380137 | -0.253053869 | 0.119705 | -2.113976 | 0.034517 | 0.058797 |
| 13749 | BGLAP     | 34.49678617 | -0.253066799 | 0.180452 | -1.402402 | 0.160795 | 0.229217 |
| 16931 | ZFP434KC  | 0.548013142 | -0.253080545 | 0.556273 | -0.454957 | 0.64914  | 0.75142  |
| 12127 | RRP7A     | 662.0850742 | -0.253167282 | 0.131932 | -1.91893  | 0.054993 | 0.088886 |
| 15852 | PRR15     | 32.04636451 | -0.253557653 | 0.334978 | -0.756939 | 0.449086 | 0.555295 |

|       |           |             |              |          |           |          |          |
|-------|-----------|-------------|--------------|----------|-----------|----------|----------|
| 11218 | UBL7      | 739.9127914 | -0.253570403 | 0.11448  | -2.214969 | 0.026762 | 0.046761 |
| 16000 | TSG1      | 14.09437542 | -0.253591917 | 0.355643 | -0.713051 | 0.475814 | 0.582902 |
| 12733 | PPM1F     | 1378.760143 | -0.253723584 | 0.14732  | -1.722259 | 0.085023 | 0.130883 |
| 16022 | TBX4      | 2.550762809 | -0.253973092 | 0.360375 | -0.704747 | 0.480968 | 0.588407 |
| 15783 | SMTNL1    | 7.254025063 | -0.254148358 | 0.325459 | -0.780892 | 0.434866 | 0.540062 |
| 9347  | RNPS1     | 1878.274838 | -0.254171567 | 0.088278 | -2.879214 | 0.003987 | 0.00836  |
| 14956 | SBK1      | 50.90140673 | -0.254242973 | 0.24894  | -1.021302 | 0.307111 | 0.402493 |
| 13860 | LRFN3     | 140.5710661 | -0.254486878 | 0.186386 | -1.365378 | 0.172134 | 0.243435 |
| 15036 | XKR6      | 8.435869064 | -0.254605276 | 0.255712 | -0.995671 | 0.31941  | 0.416384 |
| 15919 | POU2F3    | 6.517254397 | -0.254953107 | 0.346368 | -0.736076 | 0.461685 | 0.568463 |
| 9253  | B4GALT3   | 818.096923  | -0.255052565 | 0.08743  | -2.917219 | 0.003532 | 0.007481 |
| 11396 | MKI67IP   | 773.8934997 | -0.255100258 | 0.118606 | -2.150829 | 0.03149  | 0.054162 |
| 14907 | MYOM1     | 81.53486141 | -0.255134265 | 0.246719 | -1.034108 | 0.301086 | 0.395893 |
| 13253 | DOHH      | 274.8831301 | -0.255231908 | 0.163346 | -1.562526 | 0.118164 | 0.174763 |
| 15521 | LOC168474 | 4.536827945 | -0.255437465 | 0.299609 | -0.852569 | 0.393898 | 0.497442 |
| 12655 | LBH       | 2665.178126 | -0.255569509 | 0.145587 | -1.755437 | 0.079185 | 0.122647 |
| 8624  | PTBP1     | 4506.516875 | -0.255788939 | 0.080801 | -3.165657 | 0.001547 | 0.003517 |
| 14699 | MCTP1     | 150.3189928 | -0.255850496 | 0.232864 | -1.098714 | 0.271893 | 0.362567 |
| 11897 | ADAM17    | 670.3000979 | -0.255863033 | 0.128625 | -1.989219 | 0.046677 | 0.076903 |
| 12110 | IQCC      | 76.02800463 | -0.25591343  | 0.132951 | -1.924874 | 0.054245 | 0.0878   |
| 15352 | PCDHGB6   | 85.75798978 | -0.256340832 | 0.283507 | -0.904177 | 0.365901 | 0.467173 |
| 8316  | CUL1      | 1478.920942 | -0.256356648 | 0.078064 | -3.283944 | 0.001024 | 0.002413 |
| 8270  | SPATS2    | 633.3917625 | -0.256392312 | 0.077596 | -3.304184 | 0.000953 | 0.002258 |
| 14818 | UPP1      | 825.8091449 | -0.256413276 | 0.242101 | -1.059119 | 0.289546 | 0.383006 |
| 15726 | GPR156    | 2.472319693 | -0.256828097 | 0.322622 | -0.796064 | 0.425995 | 0.530963 |
| 11621 | C3orf62   | 105.8680052 | -0.257279832 | 0.124194 | -2.071588 | 0.038304 | 0.064607 |
| 9012  | LGTN      | 1165.25558  | -0.257405682 | 0.085578 | -3.007835 | 0.002631 | 0.005723 |
| 14007 | ZNF837    | 42.78316365 | -0.257476958 | 0.195615 | -1.316241 | 0.188093 | 0.263212 |
| 12100 | EIF5B     | 3193.625973 | -0.257617051 | 0.133581 | -1.928548 | 0.053787 | 0.08713  |
| 9855  | ENY2      | 573.8711598 | -0.257660524 | 0.095385 | -2.701278 | 0.006907 | 0.013737 |
| 15322 | GDPD3     | 58.8152173  | -0.257783704 | 0.282025 | -0.914046 | 0.360693 | 0.461424 |
| 17115 | ASB15     | 0.627068719 | -0.257874328 | 0.633014 | -0.407375 | 0.683732 | 0.783046 |
| 14022 | FAT1      | 6951.391345 | -0.257889393 | 0.196449 | -1.312752 | 0.189267 | 0.264552 |
| 15031 | NFASC     | 530.3852599 | -0.257934947 | 0.258851 | -0.996461 | 0.319026 | 0.416022 |
| 10047 | HTRA2     | 684.5562591 | -0.257943864 | 0.097871 | -2.635544 | 0.0084   | 0.016388 |
| 16056 | FGF20     | 1.150360058 | -0.258061529 | 0.370444 | -0.696628 | 0.486036 | 0.593332 |
| 12072 | PTPN1     | 2144.384518 | -0.258123717 | 0.133262 | -1.936959 | 0.05275  | 0.085649 |
| 12731 | CHMP6     | 586.6109624 | -0.258186304 | 0.149877 | -1.72266  | 0.08495  | 0.130791 |
| 12408 | TSSC4     | 492.373539  | -0.258257063 | 0.140833 | -1.833781 | 0.066686 | 0.105345 |
| 13571 | CCDC34    | 260.9459523 | -0.258263911 | 0.176466 | -1.463531 | 0.143322 | 0.207004 |
| 11734 | AP1B1     | 2965.868667 | -0.258441153 | 0.126553 | -2.04216  | 0.041136 | 0.068709 |
| 12758 | FAM86D    | 121.9898436 | -0.258526216 | 0.150656 | -1.716003 | 0.086161 | 0.132365 |
| 11677 | ZNF335    | 466.3556702 | -0.258565561 | 0.125714 | -2.056781 | 0.039707 | 0.066653 |
| 12184 | AKR1A1    | 3006.252096 | -0.258580941 | 0.136002 | -1.901297 | 0.057263 | 0.092122 |
| 14292 | OC1001287 | 9.05326569  | -0.258616954 | 0.209936 | -1.231887 | 0.217991 | 0.298971 |
| 10636 | CDK9      | 1033.808301 | -0.258732999 | 0.106893 | -2.420476 | 0.0155   | 0.028565 |
| 12401 | MED27     | 223.4360513 | -0.258733082 | 0.140911 | -1.836145 | 0.066336 | 0.104851 |

|       |          |             |              |          |           |          |          |
|-------|----------|-------------|--------------|----------|-----------|----------|----------|
| 14435 | NUP210   | 930.3161707 | -0.258751058 | 0.217792 | -1.188065 | 0.234808 | 0.318841 |
| 9636  | BCL7B    | 1269.945047 | -0.258891073 | 0.093571 | -2.766781 | 0.005661 | 0.011516 |
| 13802 | TPBG     | 331.0606327 | -0.258942806 | 0.18672  | -1.386795 | 0.165504 | 0.235063 |
| 13755 | MRPL54   | 731.6675691 | -0.259071642 | 0.184789 | -1.401989 | 0.160918 | 0.22931  |
| 11215 | C1orf198 | 1105.9421   | -0.259891996 | 0.117311 | -2.215411 | 0.026732 | 0.046716 |
| 13577 | KIF3C    | 329.9277726 | -0.259916298 | 0.177803 | -1.461821 | 0.14379  | 0.207589 |
| 12676 | TES      | 2113.812832 | -0.259960463 | 0.148911 | -1.745745 | 0.080855 | 0.125027 |
| 11330 | BANP     | 183.3256748 | -0.259966464 | 0.119769 | -2.170569 | 0.029964 | 0.051834 |
| 12456 | GSTK1    | 3888.462624 | -0.260118656 | 0.143095 | -1.817807 | 0.069094 | 0.108718 |
| 13889 | PAG1     | 1154.833605 | -0.260129646 | 0.192464 | -1.351576 | 0.176511 | 0.249103 |
| 13219 | SILV     | 45.00491825 | -0.260154253 | 0.165229 | -1.574508 | 0.11537  | 0.171069 |
| 14638 | LRRC17   | 153.0902795 | -0.260187898 | 0.232049 | -1.121262 | 0.262176 | 0.351043 |
| 13306 | CCT6P1   | 73.10554595 | -0.260196736 | 0.168829 | -1.541184 | 0.123272 | 0.181591 |
| 10365 | PSMB7    | 2012.991334 | -0.260230299 | 0.103193 | -2.521791 | 0.011676 | 0.02208  |
| 14163 | AMDHD2   | 403.7875171 | -0.260377271 | 0.205559 | -1.266676 | 0.205271 | 0.284047 |
| 10920 | HEXB     | 3343.363014 | -0.260519979 | 0.112693 | -2.311769 | 0.02079  | 0.037318 |
| 11900 | POU6F1   | 309.5595346 | -0.260522223 | 0.131047 | -1.987998 | 0.046812 | 0.077106 |
| 11084 | C18orf45 | 102.324261  | -0.260564991 | 0.115241 | -2.26104  | 0.023757 | 0.042012 |
| 12258 | RECQL5   | 528.0735095 | -0.260607368 | 0.138608 | -1.88017  | 0.060085 | 0.096078 |
| 15944 | MAPK15   | 96.43082786 | -0.260930361 | 0.358755 | -0.727322 | 0.467029 | 0.574122 |
| 12530 | ZFYVE19  | 535.2583467 | -0.260973156 | 0.14535  | -1.795482 | 0.072577 | 0.113534 |
| 11432 | ZNF600   | 194.1119813 | -0.261287099 | 0.122133 | -2.139366 | 0.032406 | 0.055563 |
| 9942  | EIF3D    | 4106.972741 | -0.261374786 | 0.097771 | -2.673329 | 0.00751  | 0.014807 |
| 15015 | HOXB5    | 86.37872324 | -0.26149454  | 0.260241 | -1.004816 | 0.314986 | 0.411191 |
| 14644 | GOLGA6L5 | 125.2336805 | -0.261503356 | 0.233633 | -1.119291 | 0.263016 | 0.352047 |
| 8577  | C7orf42  | 4189.343758 | -0.261867227 | 0.082337 | -3.180438 | 0.001471 | 0.00336  |
| 16353 | LRP1B    | 3.393607266 | -0.261880029 | 0.427358 | -0.612788 | 0.540017 | 0.647274 |
| 13198 | FDX1L    | 217.0366792 | -0.262429288 | 0.166213 | -1.578872 | 0.114365 | 0.169837 |
| 8797  | GORASP2  | 2243.584087 | -0.262630891 | 0.085073 | -3.087128 | 0.002021 | 0.004503 |
| 14615 | ABCC9    | 685.0688072 | -0.262814764 | 0.233081 | -1.127567 | 0.259503 | 0.348034 |
| 10419 | PSMA2    | 2266.348674 | -0.262983018 | 0.105031 | -2.503868 | 0.012284 | 0.02311  |
| 10203 | PAPD7    | 643.3738688 | -0.263110519 | 0.10194  | -2.581039 | 0.00985  | 0.018924 |
| 9658  | FAM188B  | 187.2932773 | -0.263138385 | 0.095279 | -2.761754 | 0.005749 | 0.011668 |
| 12185 | ZNF532   | 1424.640346 | -0.263172109 | 0.138435 | -1.901057 | 0.057295 | 0.092165 |
| 12572 | MAFK     | 1095.395144 | -0.263238271 | 0.147834 | -1.780636 | 0.074972 | 0.116889 |
| 10721 | PPP2R1A  | 6365.076585 | -0.263263244 | 0.110178 | -2.389435 | 0.016874 | 0.030851 |
| 7375  | KCMF1    | 1204.315577 | -0.263301309 | 0.071795 | -3.667403 | 0.000245 | 0.000651 |
| 10972 | RBM3     | 4692.566747 | -0.263387183 | 0.11471  | -2.296119 | 0.021669 | 0.038711 |
| 10479 | TBCA     | 1804.437371 | -0.26368849  | 0.106349 | -2.479463 | 0.013158 | 0.024612 |
| 9832  | C7orf26  | 489.5758466 | -0.2639862   | 0.097453 | -2.708847 | 0.006752 | 0.01346  |
| 10568 | HAUS4    | 866.2390816 | -0.264098746 | 0.107906 | -2.447492 | 0.014385 | 0.026679 |
| 11131 | AKAP13   | 3464.849975 | -0.264186138 | 0.117838 | -2.241941 | 0.024965 | 0.043958 |
| 13197 | SCRIB    | 961.1546087 | -0.26435405  | 0.167369 | -1.57947  | 0.114228 | 0.169659 |
| 14749 | C6orf114 | 6.32788561  | -0.26474673  | 0.244215 | -1.084073 | 0.278332 | 0.369896 |
| 13077 | SNRNP25  | 541.2963048 | -0.264934666 | 0.163468 | -1.620714 | 0.105079 | 0.157505 |
| 10137 | CHCHD8   | 959.4411596 | -0.265256809 | 0.10192  | -2.602598 | 0.009252 | 0.01789  |
| 13957 | WDR90    | 491.8377254 | -0.265279142 | 0.199038 | -1.332808 | 0.182595 | 0.256454 |

|       |          |             |              |          |           |          |          |
|-------|----------|-------------|--------------|----------|-----------|----------|----------|
| 12641 | MAP3K10  | 213.6982833 | -0.265338186 | 0.150769 | -1.759903 | 0.078424 | 0.121604 |
| 10726 | ZNF101   | 101.081681  | -0.265517001 | 0.111194 | -2.387868 | 0.016946 | 0.030968 |
| 11855 | SSH2     | 904.1418921 | -0.265607091 | 0.132516 | -2.004335 | 0.045034 | 0.074459 |
| 12688 | PTDSS2   | 803.9581207 | -0.265648333 | 0.152641 | -1.740343 | 0.081799 | 0.126367 |
| 13118 | POLR2J3  | 824.1215221 | -0.266094877 | 0.165724 | -1.605653 | 0.10835  | 0.161898 |
| 7829  | C1orf144 | 3138.667871 | -0.266175303 | 0.07627  | -3.48991  | 0.000483 | 0.00121  |
| 11442 | ZNF707   | 136.837952  | -0.266218662 | 0.12462  | -2.136246 | 0.032659 | 0.055948 |
| 11302 | RCCD1    | 231.1179721 | -0.266290602 | 0.122271 | -2.177881 | 0.029415 | 0.051014 |
| 12467 | XPOT     | 1772.557873 | -0.266310913 | 0.146937 | -1.812414 | 0.069922 | 0.109934 |
| 14920 | C15orf28 | 5.602624188 | -0.266476077 | 0.258646 | -1.030272 | 0.302883 | 0.397909 |
| 12606 | TAF1C    | 781.2799464 | -0.266518079 | 0.150536 | -1.770456 | 0.076651 | 0.119185 |
| 15422 | PCDH9    | 20.13934362 | -0.266673253 | 0.302014 | -0.882983 | 0.377246 | 0.479449 |
| 10115 | DNAJC9   | 443.1979031 | -0.266749046 | 0.102205 | -2.609945 | 0.009056 | 0.017548 |
| 13259 | SDSL     | 358.2103756 | -0.266749693 | 0.170889 | -1.560957 | 0.118534 | 0.175231 |
| 11899 | UBXN6    | 2683.498405 | -0.26697022  | 0.134285 | -1.98808  | 0.046803 | 0.077098 |
| 12007 | CASP8    | 862.1575538 | -0.26717641  | 0.136377 | -1.959095 | 0.050102 | 0.081789 |
| 8730  | MTA2     | 1396.876067 | -0.267486294 | 0.085846 | -3.115868 | 0.001834 | 0.004117 |
| 10172 | PLCG1    | 1630.707691 | -0.267749292 | 0.103282 | -2.592422 | 0.00953  | 0.018364 |
| 9789  | SF3B14   | 1121.684317 | -0.267770917 | 0.098469 | -2.719335 | 0.006541 | 0.013098 |
| 11151 | ATF4     | 5644.075013 | -0.267840319 | 0.119732 | -2.237002 | 0.025286 | 0.044445 |
| 12167 | SPATA20  | 1817.099185 | -0.268092387 | 0.140558 | -1.907346 | 0.056476 | 0.090982 |
| 17214 | SHOX     | 0.547061902 | -0.268097531 | 0.69619  | -0.385092 | 0.700169 | 0.797259 |
| 13446 | EPHB4    | 1130.380199 | -0.268106276 | 0.178477 | -1.502191 | 0.133048 | 0.193937 |
| 15440 | DUOX1    | 31.65207152 | -0.268304792 | 0.306264 | -0.876058 | 0.380998 | 0.483675 |
| 11758 | C10orf25 | 118.7174801 | -0.268354806 | 0.13187  | -2.03499  | 0.041852 | 0.069763 |
| 10011 | MED19    | 216.1381285 | -0.268764364 | 0.101447 | -2.649315 | 0.008066 | 0.01579  |
| 10293 | MLF2     | 3591.789912 | -0.268875656 | 0.105523 | -2.548033 | 0.010833 | 0.02063  |
| 11799 | IFRD2    | 623.9590091 | -0.268885517 | 0.133056 | -2.020847 | 0.043296 | 0.071924 |
| 9579  | U2AF2    | 2313.484447 | -0.268899261 | 0.096443 | -2.788174 | 0.005301 | 0.010846 |
| 11073 | DPP3     | 762.5032146 | -0.268924256 | 0.118719 | -2.265211 | 0.0235   | 0.041598 |
| 13934 | CRNA0021 | 679.8911319 | -0.26901785  | 0.200703 | -1.340376 | 0.180123 | 0.25338  |
| 11143 | ENTPD1   | 2057.249652 | -0.269133511 | 0.120167 | -2.239663 | 0.025113 | 0.044174 |
| 8544  | UBAC2    | 1761.916361 | -0.269222274 | 0.084352 | -3.191666 | 0.001415 | 0.003245 |
| 11987 | DYRK1B   | 515.894102  | -0.269787069 | 0.137357 | -1.964132 | 0.049515 | 0.080966 |
| 12720 | MGLL     | 7423.931612 | -0.269830259 | 0.156251 | -1.726908 | 0.084184 | 0.129724 |
| 13616 | PPP1R3B  | 2871.101295 | -0.270234419 | 0.186321 | -1.450367 | 0.146956 | 0.211552 |
| 11467 | DEDD2    | 579.1527275 | -0.270351051 | 0.126954 | -2.129519 | 0.033211 | 0.056769 |
| 11974 | C19orf39 | 58.58899329 | -0.270427651 | 0.137427 | -1.967797 | 0.049091 | 0.080361 |
| 15468 | CLDN1    | 1617.263947 | -0.270503229 | 0.31075  | -0.870485 | 0.384035 | 0.486649 |
| 14283 | ADORA2A  | 319.1525183 | -0.270591061 | 0.219231 | -1.234273 | 0.217101 | 0.297914 |
| 15973 | BCHE     | 38.89355932 | -0.270659387 | 0.375274 | -0.721231 | 0.470768 | 0.57769  |
| 12984 | OGFRL1   | 475.5124699 | -0.270793929 | 0.164205 | -1.649124 | 0.099122 | 0.149638 |
| 12191 | NEIL2    | 338.3016508 | -0.271056899 | 0.142718 | -1.899249 | 0.057532 | 0.092501 |
| 14297 | MTMR7    | 74.21177011 | -0.271187379 | 0.220462 | -1.230085 | 0.218665 | 0.299775 |
| 10254 | SRRT     | 1407.300763 | -0.271238779 | 0.105772 | -2.564378 | 0.010336 | 0.019758 |
| 12971 | LRCH4    | 698.9661513 | -0.271451952 | 0.164275 | -1.652422 | 0.098449 | 0.14877  |
| 13961 | IQCD     | 36.24342523 | -0.271492248 | 0.203927 | -1.331319 | 0.183084 | 0.257047 |

|       |           |             |              |          |           |          |          |
|-------|-----------|-------------|--------------|----------|-----------|----------|----------|
| 12697 | PTK2B     | 736.0759874 | -0.271870759 | 0.156686 | -1.735134 | 0.082717 | 0.127694 |
| 10776 | TMEM63B   | 1025.433741 | -0.27192615  | 0.114607 | -2.37269  | 0.017659 | 0.032121 |
| 15664 | FLJ40292  | 1.538706511 | -0.272391    | 0.332947 | -0.818122 | 0.413288 | 0.517164 |
| 13886 | SEL1L3    | 3332.996487 | -0.272979746 | 0.201767 | -1.352946 | 0.176073 | 0.248538 |
| 16294 | WDR64     | 0.750028456 | -0.273048958 | 0.434165 | -0.628906 | 0.529411 | 0.636859 |
| 11150 | CENPJ     | 115.0553398 | -0.273228611 | 0.12213  | -2.237195 | 0.025274 | 0.044429 |
| 10826 | STX2      | 576.5771827 | -0.273394428 | 0.116212 | -2.352557 | 0.018645 | 0.033757 |
| 14079 | PHOSPHO1  | 12.24033465 | -0.273489411 | 0.211325 | -1.294164 | 0.195609 | 0.27233  |
| 8135  | DNAJB6    | 1511.904762 | -0.27359019  | 0.081467 | -3.358276 | 0.000784 | 0.00189  |
| 9780  | DENND5A   | 2201.038086 | -0.273614958 | 0.100511 | -2.722226 | 0.006484 | 0.012996 |
| 14489 | PCDHB19F  | 10.44557877 | -0.273668558 | 0.233545 | -1.171804 | 0.241276 | 0.326403 |
| 15266 | RSPH1     | 63.54393272 | -0.273680134 | 0.294511 | -0.92927  | 0.352749 | 0.452917 |
| 15186 | ADAMTSL   | 469.7153182 | -0.273783799 | 0.287576 | -0.952041 | 0.341076 | 0.440237 |
| 15382 | GPR82     | 23.81290212 | -0.273983885 | 0.306397 | -0.894213 | 0.371208 | 0.473039 |
| 12717 | CCDC14    | 726.2594052 | -0.274157315 | 0.158709 | -1.727417 | 0.084093 | 0.129606 |
| 12651 | ZNF784    | 146.6734298 | -0.274268645 | 0.156137 | -1.756588 | 0.078988 | 0.122381 |
| 15838 | TCP11     | 2.358807485 | -0.274302138 | 0.359796 | -0.762382 | 0.445832 | 0.551759 |
| 14453 | AK1       | 467.1148255 | -0.274558816 | 0.232404 | -1.181385 | 0.23745  | 0.322027 |
| 13735 | ARRDC2    | 1643.004231 | -0.274566759 | 0.195337 | -1.405606 | 0.159841 | 0.228107 |
| 14374 | BAG2      | 161.5817504 | -0.274653674 | 0.227783 | -1.205771 | 0.227906 | 0.310782 |
| 11297 | PPIAL4C   | 34.64491539 | -0.274934628 | 0.126199 | -2.178588 | 0.029362 | 0.050945 |
| 13137 | PAQR8     | 338.9300862 | -0.274979188 | 0.172129 | -1.59752  | 0.11015  | 0.164349 |
| 11203 | PDK3      | 228.5336004 | -0.27505211  | 0.123851 | -2.220826 | 0.026363 | 0.046125 |
| 12856 | ULK1      | 1409.246317 | -0.275133247 | 0.16281  | -1.689908 | 0.091046 | 0.138813 |
| 12855 | MAMLD1    | 137.6899806 | -0.275142037 | 0.16281  | -1.689963 | 0.091035 | 0.138808 |
| 10099 | ELL       | 530.4718131 | -0.275499734 | 0.105292 | -2.616529 | 0.008883 | 0.017239 |
| 12372 | IFT27     | 431.477504  | -0.275872048 | 0.149668 | -1.843224 | 0.065296 | 0.103449 |
| 12144 | ADARB1    | 621.5765592 | -0.275881643 | 0.14416  | -1.913716 | 0.055656 | 0.089832 |
| 17287 | PENK      | 0.965835945 | -0.275930077 | 0.742819 | -0.371463 | 0.710292 | 0.805397 |
| 12561 | PHPT1     | 1394.0784   | -0.276129533 | 0.154784 | -1.78397  | 0.074429 | 0.116116 |
| 12872 | TRPC1     | 323.8595107 | -0.276267925 | 0.163939 | -1.685187 | 0.091953 | 0.140029 |
| 11895 | MVD       | 377.4508368 | -0.276274335 | 0.138839 | -1.989891 | 0.046603 | 0.076794 |
| 12136 | DUSP7     | 520.7654435 | -0.276426039 | 0.144264 | -1.916114 | 0.055351 | 0.089385 |
| 14600 | LOC338799 | 274.1260539 | -0.276485892 | 0.243503 | -1.13545  | 0.256187 | 0.34394  |
| 10744 | DHRX      | 601.8526836 | -0.276744226 | 0.116138 | -2.3829   | 0.017177 | 0.031337 |
| 11387 | TRAF2     | 382.4036754 | -0.277039762 | 0.128501 | -2.155931 | 0.031089 | 0.053515 |
| 12847 | TBKBP1    | 298.2345628 | -0.27706177  | 0.163801 | -1.691454 | 0.09075  | 0.13846  |
| 10174 | C17orf59  | 223.4802432 | -0.277220176 | 0.106999 | -2.590861 | 0.009574 | 0.018444 |
| 11586 | EEF2      | 53272.81074 | -0.277588001 | 0.133101 | -2.085552 | 0.037019 | 0.062629 |
| 14112 | LEPREL1   | 4312.116019 | -0.277613195 | 0.216388 | -1.28294  | 0.199513 | 0.277115 |
| 12202 | GEN1      | 238.5407817 | -0.278254685 | 0.146783 | -1.895684 | 0.058002 | 0.093173 |
| 11541 | PARP8     | 576.6962096 | -0.278385551 | 0.132509 | -2.100887 | 0.035651 | 0.060549 |
| 11627 | CLK2      | 638.168726  | -0.278893974 | 0.134784 | -2.069199 | 0.038527 | 0.06495  |
| 11788 | MTG1      | 452.9337922 | -0.278907029 | 0.137649 | -2.026212 | 0.042743 | 0.071073 |
| 11936 | WDR85     | 237.3035731 | -0.279078229 | 0.141034 | -1.978806 | 0.047838 | 0.078563 |
| 9340  | CYTH1     | 843.1475435 | -0.279365518 | 0.096925 | -2.88228  | 0.003948 | 0.008285 |
| 15096 | CRIP1     | 1359.179036 | -0.279409354 | 0.285861 | -0.97743  | 0.328356 | 0.426345 |

|       |           |             |              |          |           |          |          |
|-------|-----------|-------------|--------------|----------|-----------|----------|----------|
| 14184 | NETO2     | 1579.676142 | -0.279421994 | 0.221519 | -1.261388 | 0.207169 | 0.286289 |
| 12484 | HLA-H     | 3996.464585 | -0.279808137 | 0.154764 | -1.807972 | 0.070611 | 0.110863 |
| 11223 | POLL      | 610.088133  | -0.279850526 | 0.126497 | -2.212307 | 0.026945 | 0.04706  |
| 12705 | ARL6IP6   | 357.4713242 | -0.279968302 | 0.161678 | -1.731644 | 0.083337 | 0.12857  |
| 15113 | C1QTNF7   | 61.0652853  | -0.279993968 | 0.28798  | -0.97227  | 0.330916 | 0.429186 |
| 9219  | PRDX6     | 5178.761251 | -0.280192965 | 0.095608 | -2.930646 | 0.003383 | 0.007192 |
| 6677  | ISY1      | 504.7968308 | -0.280384918 | 0.070951 | -3.951798 | 7.76E-05 | 0.000228 |
| 13413 | PPP1R15A  | 2237.995793 | -0.280475352 | 0.185788 | -1.509651 | 0.131132 | 0.191637 |
| 11822 | MAP3K11   | 2117.379327 | -0.280481862 | 0.139275 | -2.013867 | 0.044024 | 0.072991 |
| 12564 | TRIM59    | 179.3807355 | -0.280500446 | 0.157234 | -1.783967 | 0.074429 | 0.116116 |
| 14955 | AFF2      | 82.91960629 | -0.280656011 | 0.2747   | -1.021683 | 0.306931 | 0.402284 |
| 16475 | ADH1A     | 3.71885571  | -0.280698173 | 0.484777 | -0.579026 | 0.562572 | 0.669315 |
| 15421 | RHBDL1    | 65.32086165 | -0.280831679 | 0.317859 | -0.88351  | 0.376961 | 0.479139 |
| 10815 | PLK1S1    | 347.2626048 | -0.280893871 | 0.119176 | -2.356972 | 0.018425 | 0.033393 |
| 15647 | SULT1B1   | 4.154223172 | -0.280904575 | 0.341069 | -0.8236   | 0.410167 | 0.513816 |
| 11213 | TPCN1     | 1806.106108 | -0.280939231 | 0.126794 | -2.215709 | 0.026711 | 0.046693 |
| 9999  | LOC646762 | 286.3652471 | -0.280950641 | 0.105899 | -2.653001 | 0.007978 | 0.015639 |
| 14440 | SPP1      | 39420.75743 | -0.280976934 | 0.237025 | -1.185434 | 0.235846 | 0.32014  |
| 12160 | DTNB      | 227.02363   | -0.281019697 | 0.147311 | -1.907667 | 0.056434 | 0.090953 |
| 10907 | WDYHV1    | 181.2272618 | -0.2811957   | 0.121264 | -2.318865 | 0.020402 | 0.036665 |
| 17324 | SNORA48   | 0.334287808 | -0.281491337 | 0.77892  | -0.361387 | 0.71781  | 0.812156 |
| 17238 | LOC285740 | 0.271967688 | -0.281491363 | 0.741835 | -0.379453 | 0.704352 | 0.800905 |
| 17623 | GLRA3     | 0.364255827 | -0.281491443 | 0.977056 | -0.288102 | 0.773269 | 0.86006  |
| 17359 | FAM48B2   | 0.234816023 | -0.281491445 | 0.803218 | -0.350455 | 0.725998 | 0.819764 |
| 17477 | CLEC4M    | 0.297572531 | -0.281491448 | 0.881443 | -0.319353 | 0.749459 | 0.84054  |
| 17613 | KRT31     | 0.274487544 | -0.281491546 | 0.968406 | -0.290675 | 0.7713   | 0.858357 |
| 17788 | DC1001334 | 0.355279279 | -0.281491563 | 1.136284 | -0.24773  | 0.804343 | 0.886324 |
| 17584 | C8orf75   | 0.238078387 | -0.281491579 | 0.947804 | -0.296994 | 0.766471 | 0.854438 |
| 17549 | HIST2H2AI | 0.176163242 | -0.281491637 | 0.930858 | -0.3024   | 0.762347 | 0.851439 |
| 17633 | GCM2      | 0.172391542 | -0.28149171  | 0.992393 | -0.283649 | 0.776679 | 0.863401 |
| 17734 | OTOP2     | 0.280567931 | -0.281491725 | 1.083602 | -0.259774 | 0.795038 | 0.878738 |
| 17629 | KIR3DL3   | 0.154773845 | -0.281491735 | 0.989903 | -0.284363 | 0.776132 | 0.862951 |
| 17920 | C2orf53   | 0.272792503 | -0.281491843 | 1.253448 | -0.224574 | 0.822311 | 0.899448 |
| 17799 | PGK2      | 0.194750322 | -0.281491869 | 1.142355 | -0.246414 | 0.805362 | 0.886898 |
| 17803 | DC1001333 | 0.189432833 | -0.281491872 | 1.144866 | -0.245873 | 0.80578  | 0.88716  |
| 17886 | CACNG7    | 0.214864629 | -0.28149194  | 1.224578 | -0.229868 | 0.818194 | 0.896647 |
| 17902 | FLJ43859  | 0.206873806 | -0.281491955 | 1.235591 | -0.22782  | 0.819786 | 0.897565 |
| 17885 | CNTNAP4   | 0.191043645 | -0.281491982 | 1.224246 | -0.229931 | 0.818145 | 0.896644 |
| 17878 | OR52H1    | 0.136882811 | -0.281492105 | 1.220066 | -0.230719 | 0.817533 | 0.896274 |
| 17880 | SNORA72   | 0.13668528  | -0.281492105 | 1.220221 | -0.230689 | 0.817556 | 0.896274 |
| 17976 | OR1K1     | 0.190719092 | -0.281492139 | 1.32873  | -0.21185  | 0.832224 | 0.907455 |
| 17965 | HOXC12    | 0.157001068 | -0.281492221 | 1.317246 | -0.213698 | 0.830783 | 0.906439 |
| 17973 | TMCO2     | 0.117315782 | -0.281492338 | 1.326491 | -0.212208 | 0.831945 | 0.907302 |
| 18109 | NLRP8     | 0.192215991 | -0.281492513 | 1.550772 | -0.181518 | 0.855961 | 0.926484 |
| 18124 | CACNG1    | 0.133284539 | -0.281492765 | 1.571518 | -0.179122 | 0.857842 | 0.927751 |
| 18123 | SERPINI2  | 0.118735757 | -0.281492835 | 1.570961 | -0.179185 | 0.857792 | 0.927749 |
| 18127 | OR51Q1    | 0.114775223 | -0.281492847 | 1.5765   | -0.178556 | 0.858287 | 0.928078 |

|       |           |             |              |          |           |          |          |
|-------|-----------|-------------|--------------|----------|-----------|----------|----------|
| 18131 | POM121L4  | 0.112627889 | -0.281492854 | 1.579618 | -0.178203 | 0.858563 | 0.928204 |
| 18196 | LOC643486 | 0.118942173 | -0.281493197 | 1.727697 | -0.16293  | 0.870574 | 0.937795 |
| 18197 | C6orf191  | 0.117431661 | -0.281493211 | 1.733402 | -0.162393 | 0.870996 | 0.938198 |
| 18198 | MUC21     | 0.11443499  | -0.281493215 | 1.735095 | -0.162235 | 0.871121 | 0.938281 |
| 18264 | SMEK3P    | 0.175486847 | -0.281493276 | 1.880034 | -0.149728 | 0.880979 | 0.945545 |
| 18209 | PANX3     | 0.09601429  | -0.281493359 | 1.75758  | -0.16016  | 0.872755 | 0.939474 |
| 18272 | SNORA34   | 0.138715178 | -0.281493523 | 1.896724 | -0.14841  | 0.882019 | 0.946172 |
| 18282 | C1orf49   | 0.114985856 | -0.281493687 | 1.919271 | -0.146667 | 0.883395 | 0.94713  |
| 18283 | OR1L3     | 0.113824406 | -0.281493693 | 1.9216   | -0.146489 | 0.883535 | 0.947228 |
| 18286 | FGF3      | 0.115318361 | -0.281493703 | 1.925334 | -0.146205 | 0.883759 | 0.947313 |
| 18315 | DRD3      | 0.077020397 | -0.281494122 | 1.994387 | -0.141143 | 0.887757 | 0.950026 |
| 18320 | VSX2      | 0.075554433 | -0.281494137 | 1.999202 | -0.140803 | 0.888025 | 0.950134 |
| 18387 | CYP11B1   | 0.114467472 | -0.281494337 | 2.147234 | -0.131096 | 0.895699 | 0.954824 |
| 18392 | PRR23A    | 0.115319685 | -0.281494354 | 2.153121 | -0.130738 | 0.895983 | 0.954883 |
| 18395 | KRTAP17-1 | 0.100754672 | -0.281494556 | 2.174752 | -0.129438 | 0.897011 | 0.955821 |
| 18399 | LRRC10    | 0.094583793 | -0.281494598 | 2.187921 | -0.128658 | 0.897628 | 0.95627  |
| 18400 | OR52N1    | 0.094615404 | -0.281494605 | 2.190141 | -0.128528 | 0.897731 | 0.956328 |
| 18417 | SPRR2C    | 0.078768397 | -0.281494889 | 2.233452 | -0.126036 | 0.899704 | 0.957629 |
| 18419 | GPR50     | 0.075579879 | -0.281494932 | 2.246144 | -0.125324 | 0.900267 | 0.957988 |
| 18421 | CPXCR1    | 0.074489304 | -0.281494948 | 2.250638 | -0.125073 | 0.900465 | 0.958147 |
| 18495 | PRAMEF11  | 0.091839078 | -0.281495662 | 2.498793 | -0.112653 | 0.910306 | 0.964742 |
| 18502 | HBZ       | 0.077959013 | -0.281496019 | 2.545147 | -0.110601 | 0.911933 | 0.966101 |
| 18506 | KRT9      | 0.075699055 | -0.281496055 | 2.554304 | -0.110205 | 0.912247 | 0.966225 |
| 18520 | GHSR      | 0.059046782 | -0.281496616 | 2.645498 | -0.106406 | 0.91526  | 0.968683 |
| 18581 | DCAF4L2   | 0.073461416 | -0.281497547 | 2.91407  | -0.096599 | 0.923045 | 0.972284 |
| 18587 | FOXR2     | 0.077337648 | -0.281497547 | 2.91407  | -0.096599 | 0.923045 | 0.972284 |
| 18592 | IL21      | 0.078220444 | -0.281497547 | 2.91407  | -0.096599 | 0.923045 | 0.972284 |
| 18600 | PLSCR5    | 0.075339349 | -0.281497547 | 2.91407  | -0.096599 | 0.923045 | 0.972284 |
| 18575 | AADACL3   | 0.053324315 | -0.281497792 | 2.91407  | -0.0966   | 0.923044 | 0.972284 |
| 18577 | ACSM4     | 0.059356555 | -0.281497792 | 2.91407  | -0.0966   | 0.923044 | 0.972284 |
| 18578 | C18orf26  | 0.058051271 | -0.281497792 | 2.91407  | -0.0966   | 0.923044 | 0.972284 |
| 18579 | CSH1      | 0.059120482 | -0.281497792 | 2.91407  | -0.0966   | 0.923044 | 0.972284 |
| 18582 | FZp686A10 | 0.075020294 | -0.281497792 | 2.91407  | -0.0966   | 0.923044 | 0.972284 |
| 18584 | F13B      | 0.0576037   | -0.281497792 | 2.91407  | -0.0966   | 0.923044 | 0.972284 |
| 18585 | F9        | 0.056178166 | -0.281497792 | 2.91407  | -0.0966   | 0.923044 | 0.972284 |
| 18586 | FOXD4L5   | 0.058554815 | -0.281497792 | 2.91407  | -0.0966   | 0.923044 | 0.972284 |
| 18588 | GAGE1     | 0.056949673 | -0.281497792 | 2.91407  | -0.0966   | 0.923044 | 0.972284 |
| 18590 | H1FOO     | 0.057894096 | -0.281497792 | 2.91407  | -0.0966   | 0.923044 | 0.972284 |
| 18593 | KRTAP4-1  | 0.06162046  | -0.281497792 | 2.91407  | -0.0966   | 0.923044 | 0.972284 |
| 18594 | DC1001302 | 0.060739295 | -0.281497792 | 2.91407  | -0.0966   | 0.923044 | 0.972284 |
| 18595 | MC2R      | 0.053153344 | -0.281497792 | 2.91407  | -0.0966   | 0.923044 | 0.972284 |
| 18596 | OR2B2     | 0.054977845 | -0.281497792 | 2.91407  | -0.0966   | 0.923044 | 0.972284 |
| 18598 | PAGE1     | 0.058022724 | -0.281497792 | 2.91407  | -0.0966   | 0.923044 | 0.972284 |
| 18603 | SAG       | 0.057817391 | -0.281497792 | 2.91407  | -0.0966   | 0.923044 | 0.972284 |
| 18608 | APRSS11B1 | 0.052374962 | -0.281497792 | 2.91407  | -0.0966   | 0.923044 | 0.972284 |
| 18597 | OTOP3     | 0.056023153 | -0.281497792 | 2.91407  | -0.0966   | 0.923044 | 0.972284 |
| 18604 | SNORA38E  | 0.058170207 | -0.281497792 | 2.91407  | -0.0966   | 0.923044 | 0.972284 |

|       |           |             |              |          |           |          |          |
|-------|-----------|-------------|--------------|----------|-----------|----------|----------|
| 12116 | SYNGAP1   | 293.5264367 | -0.281586132 | 0.146415 | -1.9232   | 0.054455 | 0.088096 |
| 11955 | C3orf34   | 69.7720143  | -0.28182796  | 0.142857 | -1.972798 | 0.048519 | 0.079542 |
| 12075 | CISD3     | 928.7331541 | -0.281917744 | 0.145649 | -1.935595 | 0.052917 | 0.085892 |
| 16940 | FEV       | 0.420473955 | -0.281977774 | 0.622925 | -0.452667 | 0.650788 | 0.753017 |
| 10245 | LOC388789 | 699.7891027 | -0.281989193 | 0.109863 | -2.566733 | 0.010266 | 0.019641 |
| 13377 | ATAD5     | 53.38600629 | -0.282015451 | 0.185764 | -1.518142 | 0.128979 | 0.188989 |
| 12743 | FAHD2A    | 363.6172344 | -0.282037718 | 0.164044 | -1.719281 | 0.085563 | 0.131604 |
| 10319 | DENND4B   | 937.7976374 | -0.282110486 | 0.111026 | -2.540944 | 0.011055 | 0.021    |
| 10879 | WDR8      | 298.6993191 | -0.282124173 | 0.121107 | -2.329543 | 0.01983  | 0.035729 |
| 8641  | RPIA      | 316.9682576 | -0.28226067  | 0.089489 | -3.154143 | 0.00161  | 0.003651 |
| 16623 | TSPYL6    | 0.528965071 | -0.282377337 | 0.520414 | -0.542601 | 0.587405 | 0.692638 |
| 11501 | PPAPDC1E  | 595.1236611 | -0.282437743 | 0.133385 | -2.117464 | 0.034221 | 0.058322 |
| 14626 | LOC642846 | 174.646478  | -0.282553981 | 0.251142 | -1.125079 | 0.260556 | 0.349183 |
| 11844 | PPOX      | 265.9938418 | -0.282772978 | 0.140849 | -2.007627 | 0.044683 | 0.073947 |
| 14043 | CEMP1     | 316.8892739 | -0.282774297 | 0.216963 | -1.30333  | 0.192462 | 0.268636 |
| 12189 | WDR83     | 197.0549933 | -0.283167214 | 0.14904  | -1.899946 | 0.05744  | 0.092369 |
| 11295 | C22orf27  | 102.5081711 | -0.283207184 | 0.129949 | -2.179367 | 0.029304 | 0.050854 |
| 9657  | DRG2      | 639.0711417 | -0.283251931 | 0.102546 | -2.762192 | 0.005741 | 0.011654 |
| 12380 | TNFSF12   | 1019.319207 | -0.283446244 | 0.153886 | -1.841928 | 0.065486 | 0.103682 |
| 17163 | COL2A1    | 1.077469787 | -0.28344923  | 0.717291 | -0.395166 | 0.69272  | 0.791121 |
| 14396 | ADAMTS8   | 16.294296   | -0.283468354 | 0.236443 | -1.198889 | 0.230571 | 0.313936 |
| 14928 | RXFP1     | 30.14774654 | -0.28347346  | 0.276118 | -1.026637 | 0.304591 | 0.399939 |
| 15843 | PTGFR     | 108.732265  | -0.283491095 | 0.372573 | -0.7609   | 0.446717 | 0.552729 |
| 13910 | SLC45A3   | 133.5715311 | -0.283783657 | 0.210611 | -1.347428 | 0.177842 | 0.250603 |
| 10488 | PIP5K1C   | 1258.43887  | -0.283794426 | 0.114646 | -2.475395 | 0.013309 | 0.024873 |
| 11169 | C19orf44  | 220.6670548 | -0.283860835 | 0.127162 | -2.23228  | 0.025596 | 0.04492  |
| 10674 | CRELD1    | 707.4848043 | -0.283868983 | 0.118079 | -2.40407  | 0.016214 | 0.029774 |
| 11451 | TGIF1     | 1143.692036 | -0.284083428 | 0.133109 | -2.134216 | 0.032825 | 0.05619  |
| 13511 | C6orf226  | 64.21994253 | -0.284321855 | 0.191508 | -1.484644 | 0.137638 | 0.199678 |
| 6890  | SAE1      | 1344.730745 | -0.28448039  | 0.073546 | -3.868053 | 0.00011  | 0.000312 |
| 17591 | FAM138E   | 0.43758361  | -0.284599295 | 0.962029 | -0.295832 | 0.767358 | 0.855039 |
| 10379 | TTC13     | 261.5384806 | -0.284814113 | 0.11335  | -2.512696 | 0.011981 | 0.022627 |
| 15607 | SCARNA7   | 10.26038202 | -0.284931161 | 0.341726 | -0.8338   | 0.404394 | 0.507927 |
| 13410 | GNG2      | 659.0651801 | -0.285080576 | 0.188783 | -1.510094 | 0.13102  | 0.191507 |
| 12751 | C21orf2   | 495.6039793 | -0.285084089 | 0.165935 | -1.718047 | 0.085788 | 0.131874 |
| 12067 | SQSTM1    | 13597.45493 | -0.28518049  | 0.147049 | -1.939353 | 0.052458 | 0.085211 |
| 8053  | SFRS4     | 1782.451138 | -0.285258973 | 0.084111 | -3.391451 | 0.000695 | 0.001692 |
| 14107 | PLAGL1    | 685.4393455 | -0.285316609 | 0.221647 | -1.287259 | 0.198004 | 0.275117 |
| 15329 | PDE6A     | 1.43004318  | -0.285344168 | 0.31337  | -0.910565 | 0.362524 | 0.463555 |
| 10285 | OVCA2     | 588.1679935 | -0.285456999 | 0.111881 | -2.55143  | 0.010728 | 0.020446 |
| 12292 | MPND      | 451.2312306 | -0.285554516 | 0.152839 | -1.868339 | 0.061715 | 0.098411 |
| 10919 | RPL15     | 15116.19855 | -0.285743007 | 0.123593 | -2.311977 | 0.020779 | 0.037301 |
| 10589 | BNIP1     | 226.7001073 | -0.286079571 | 0.117252 | -2.439865 | 0.014693 | 0.027197 |
| 15649 | FAM40B    | 116.6248377 | -0.286154064 | 0.347673 | -0.823055 | 0.410477 | 0.514139 |
| 8027  | PARN      | 1069.138413 | -0.286338237 | 0.084215 | -3.400094 | 0.000674 | 0.001645 |
| 7861  | POLR2D    | 446.5934068 | -0.286420477 | 0.082627 | -3.466421 | 0.000527 | 0.001315 |
| 6059  | HNRPUL    | 4361.384044 | -0.286573855 | 0.067589 | -4.239974 | 2.24E-05 | 7.23E-05 |



|       |          |             |              |          |           |          |          |
|-------|----------|-------------|--------------|----------|-----------|----------|----------|
| 10258 | SFRS8    | 864.4372183 | -0.286579135 | 0.111843 | -2.562327 | 0.010397 | 0.019867 |
| 7777  | FAM134C  | 1832.638019 | -0.28660088  | 0.081694 | -3.508237 | 0.000451 | 0.001137 |
| 15467 | C3orf45  | 1.663813957 | -0.286700349 | 0.329268 | -0.87072  | 0.383907 | 0.486517 |
| 11742 | CCDC94   | 396.3135406 | -0.286891714 | 0.140667 | -2.039513 | 0.041399 | 0.069107 |
| 13539 | PRTFDC1  | 109.5387216 | -0.287099952 | 0.194796 | -1.473852 | 0.140521 | 0.203439 |
| 14305 | GPSM1    | 276.4748249 | -0.287120775 | 0.233858 | -1.227759 | 0.219538 | 0.300815 |
| 8665  | WDR41    | 796.1700757 | -0.28746684  | 0.091376 | -3.145981 | 0.001655 | 0.003744 |
| 10173 | FPGS     | 627.9145236 | -0.287495958 | 0.110905 | -2.592273 | 0.009534 | 0.018371 |
| 12719 | USP18    | 243.6531168 | -0.287520188 | 0.166472 | -1.727135 | 0.084143 | 0.129672 |
| 11796 | UBE2E2   | 426.3448983 | -0.287571433 | 0.142162 | -2.022837 | 0.04309  | 0.071601 |
| 9490  | C12orf65 | 384.2174975 | -0.287686191 | 0.101968 | -2.821342 | 0.004782 | 0.009875 |
| 8091  | DVL3     | 1902.790237 | -0.287837915 | 0.085326 | -3.373394 | 0.000742 | 0.001798 |
| 9153  | CRTC2    | 878.7114354 | -0.287932684 | 0.097375 | -2.956958 | 0.003107 | 0.006653 |
| 9127  | CUTC     | 288.238081  | -0.288134174 | 0.09713  | -2.966479 | 0.003012 | 0.006469 |
| 8788  | ZNF259   | 712.8927032 | -0.288170883 | 0.093272 | -3.08959  | 0.002004 | 0.004471 |
| 10889 | ZNF862   | 505.8437743 | -0.288257892 | 0.124052 | -2.323694 | 0.020142 | 0.036257 |
| 13040 | AP1G2    | 845.7245716 | -0.288360849 | 0.176644 | -1.632442 | 0.102586 | 0.15419  |
| 9231  | SUPT5H   | 2786.157406 | -0.288395938 | 0.098508 | -2.927648 | 0.003415 | 0.007252 |
| 14768 | FKBP1AP1 | 13.82485673 | -0.288403444 | 0.267533 | -1.07801  | 0.281029 | 0.372999 |
| 13312 | BAHCC1   | 443.7562625 | -0.288409273 | 0.18739  | -1.539087 | 0.123783 | 0.182262 |
| 16965 | CYorf15A | 99.67133876 | -0.288497113 | 0.643273 | -0.448483 | 0.653805 | 0.755392 |
| 12550 | TMEM209  | 658.5668166 | -0.288582339 | 0.16116  | -1.790657 | 0.073348 | 0.114564 |
| 14527 | AXIN2    | 83.13407956 | -0.288663629 | 0.249495 | -1.156989 | 0.247277 | 0.333646 |
| 12087 | C3orf64  | 582.2093079 | -0.288944116 | 0.149566 | -1.931885 | 0.053374 | 0.086553 |
| 13282 | PGP      | 334.2117537 | -0.28900047  | 0.186457 | -1.549954 | 0.121153 | 0.178792 |
| 12370 | ZNF273   | 86.76029017 | -0.289131364 | 0.15684  | -1.843474 | 0.06526  | 0.103408 |
| 11250 | CASP3    | 620.4116239 | -0.289268624 | 0.131482 | -2.200064 | 0.027802 | 0.048436 |
| 9199  | EIF3H    | 3824.232312 | -0.289896081 | 0.098662 | -2.938276 | 0.0033   | 0.007032 |
| 13998 | C10orf75 | 108.7927648 | -0.290273951 | 0.22017  | -1.318411 | 0.187366 | 0.262345 |
| 10141 | MARS     | 1479.376355 | -0.290387617 | 0.111628 | -2.601385 | 0.009285 | 0.017946 |
| 14879 | 43891    | 177.2746485 | -0.290828486 | 0.278782 | -1.043211 | 0.296851 | 0.391073 |
| 13060 | C5orf45  | 255.04651   | -0.291092722 | 0.179066 | -1.625615 | 0.104032 | 0.156135 |
| 9162  | POC5     | 187.389562  | -0.291328552 | 0.098619 | -2.954081 | 0.003136 | 0.006709 |
| 11688 | SOLH     | 1052.373781 | -0.291505719 | 0.141951 | -2.053572 | 0.040017 | 0.067104 |
| 15600 | LY6K     | 27.30799576 | -0.291566978 | 0.348912 | -0.835647 | 0.403354 | 0.506803 |
| 10631 | HSPA5    | 17240.67297 | -0.29173368  | 0.120475 | -2.421538 | 0.015455 | 0.028494 |
| 9067  | STK35    | 936.4364364 | -0.291811983 | 0.097535 | -2.99187  | 0.002773 | 0.005994 |
| 10262 | PPT1     | 4488.781412 | -0.291910649 | 0.113951 | -2.561731 | 0.010415 | 0.019894 |
| 11590 | THOP1    | 498.7266046 | -0.292179113 | 0.140225 | -2.083649 | 0.037192 | 0.062899 |
| 12630 | UROS     | 766.0550066 | -0.292209424 | 0.165643 | -1.764095 | 0.077716 | 0.12061  |
| 7749  | RRP1B    | 670.6325737 | -0.292343153 | 0.083065 | -3.519444 | 0.000432 | 0.001094 |
| 11592 | TMEM9    | 2398.025718 | -0.292666067 | 0.140501 | -2.083024 | 0.037249 | 0.062985 |
| 15010 | CHAC1    | 59.53060538 | -0.292751946 | 0.291171 | -1.005428 | 0.314691 | 0.410943 |
| 15047 | PDE4C    | 58.01991682 | -0.292781301 | 0.295295 | -0.991487 | 0.321448 | 0.418735 |
| 12944 | TP53I3   | 735.7349464 | -0.292859528 | 0.176251 | -1.661608 | 0.096591 | 0.146268 |
| 10504 | CIC      | 1573.609558 | -0.292934992 | 0.118591 | -2.470122 | 0.013507 | 0.025203 |
| 11113 | WDFY2    | 174.8225213 | -0.293071155 | 0.130383 | -2.247778 | 0.02459  | 0.043372 |

|       |           |             |              |          |           |          |          |
|-------|-----------|-------------|--------------|----------|-----------|----------|----------|
| 13321 | SMPD3     | 37.31192961 | -0.293224941 | 0.190912 | -1.535921 | 0.124558 | 0.183279 |
| 14230 | LOC390595 | 9.65635121  | -0.293270815 | 0.234778 | -1.24914  | 0.211614 | 0.291465 |
| 11066 | BCS1L     | 384.2178938 | -0.293308093 | 0.129339 | -2.267742 | 0.023345 | 0.041349 |
| 11438 | GALNT1    | 1778.892908 | -0.293534262 | 0.137294 | -2.138005 | 0.032516 | 0.055722 |
| 13652 | PLCXD2    | 60.13823044 | -0.293798589 | 0.204374 | -1.437552 | 0.150561 | 0.21617  |
| 9310  | ATXN2L    | 2361.694947 | -0.294203151 | 0.101577 | -2.896353 | 0.003775 | 0.007948 |
| 9977  | ANKRD54   | 411.8951049 | -0.294559282 | 0.110711 | -2.660624 | 0.0078   | 0.015323 |
| 12403 | WDHD1     | 110.2568028 | -0.294641222 | 0.160513 | -1.83562  | 0.066414 | 0.104957 |
| 13293 | C19orf23  | 16.80704052 | -0.294717454 | 0.190702 | -1.545434 | 0.122241 | 0.180236 |
| 9062  | LOC285074 | 240.0567808 | -0.294878345 | 0.098497 | -2.993787 | 0.002755 | 0.00596  |
| 15871 | ASMT      | 0.937153584 | -0.29505186  | 0.391995 | -0.752693 | 0.451634 | 0.557777 |
| 14222 | MST4      | 147.9435938 | -0.295324858 | 0.23605  | -1.25111  | 0.210894 | 0.290638 |
| 10637 | RPL7      | 1409.456852 | -0.295393289 | 0.122082 | -2.419632 | 0.015536 | 0.028629 |
| 15210 | PMAIP1    | 125.605315  | -0.295431016 | 0.312734 | -0.944672 | 0.344826 | 0.444375 |
| 12596 | FLJ45340  | 906.5837607 | -0.295638979 | 0.16661  | -1.77444  | 0.07599  | 0.118251 |
| 16009 | UGT1A1    | 47.37056534 | -0.295658427 | 0.416975 | -0.709056 | 0.47829  | 0.585606 |
| 13200 | HLA-F     | 3102.310542 | -0.295708127 | 0.187318 | -1.578645 | 0.114418 | 0.169901 |
| 7003  | CAP1      | 6780.846439 | -0.295781019 | 0.077384 | -3.822252 | 0.000132 | 0.00037  |
| 11661 | STARD13   | 849.2939306 | -0.295885984 | 0.143695 | -2.059126 | 0.039482 | 0.066366 |
| 13126 | NBPF9     | 326.3238324 | -0.295915793 | 0.184644 | -1.602625 | 0.109017 | 0.162795 |
| 8789  | ACTR1A    | 2397.080344 | -0.295952049 | 0.095794 | -3.08947  | 0.002005 | 0.004472 |
| 16996 | DDX3Y     | 780.9522311 | -0.296072516 | 0.672009 | -0.440578 | 0.659518 | 0.760604 |
| 7992  | PDCL3     | 447.7510215 | -0.296098514 | 0.086776 | -3.412223 | 0.000644 | 0.00158  |
| 14733 | SOBP      | 139.9781006 | -0.296345729 | 0.2721   | -1.089106 | 0.276107 | 0.367337 |
| 10963 | TET3      | 496.1315538 | -0.296521357 | 0.128949 | -2.299516 | 0.021476 | 0.038397 |
| 10354 | C11orf31  | 975.7802655 | -0.29652185  | 0.11741  | -2.525534 | 0.011552 | 0.021869 |
| 10961 | PDRG1     | 386.4608958 | -0.296693498 | 0.128996 | -2.300024 | 0.021447 | 0.038352 |
| 10511 | GSS       | 1325.945248 | -0.296707557 | 0.120218 | -2.468081 | 0.013584 | 0.025331 |
| 11289 | TNIP1     | 7723.692568 | -0.296857676 | 0.136009 | -2.182627 | 0.029063 | 0.050462 |
| 15343 | LOC613037 | 26.17570525 | -0.296960328 | 0.327503 | -0.90674  | 0.364544 | 0.465713 |
| 12068 | PDE4DIP   | 2134.146465 | -0.297134775 | 0.153264 | -1.938717 | 0.052536 | 0.085329 |
| 13973 | SLC46A2   | 10.47015241 | -0.297168298 | 0.223777 | -1.327968 | 0.184189 | 0.258376 |
| 10151 | TESK1     | 794.0532589 | -0.297247021 | 0.114387 | -2.598609 | 0.00936  | 0.018074 |
| 13149 | ZNF423    | 135.0502906 | -0.297253755 | 0.186327 | -1.595336 | 0.110637 | 0.164925 |
| 11245 | TMEM42    | 205.6938757 | -0.297341248 | 0.13505  | -2.201717 | 0.027685 | 0.048258 |
| 13811 | SNORD1C   | 25.39837473 | -0.29752399  | 0.215167 | -1.382757 | 0.166739 | 0.236625 |
| 14944 | TGFA      | 3178.641625 | -0.297581733 | 0.290688 | -1.023715 | 0.30597  | 0.40132  |
| 13181 | MTP18     | 1100.833449 | -0.297911219 | 0.187953 | -1.585027 | 0.11296  | 0.167979 |
| 16597 | GPR152    | 0.53558489  | -0.298152586 | 0.543755 | -0.548322 | 0.583471 | 0.688909 |
| 9125  | PWP2      | 489.0793503 | -0.298208082 | 0.100491 | -2.967523 | 0.003002 | 0.006449 |
| 14066 | OXER1     | 121.3366352 | -0.298865124 | 0.230306 | -1.297689 | 0.194394 | 0.270889 |
| 9151  | CDK11B    | 602.815462  | -0.298979631 | 0.101061 | -2.95841  | 0.003092 | 0.006624 |
| 13461 | MAP1B     | 2806.76962  | -0.299176266 | 0.199655 | -1.498464 | 0.134013 | 0.19514  |
| 12589 | PMS2L3    | 51.88547438 | -0.299198237 | 0.168379 | -1.776936 | 0.075579 | 0.117676 |
| 13915 | LOC202181 | 39.39090937 | -0.299367366 | 0.222524 | -1.345327 | 0.17852  | 0.251449 |
| 14159 | AHSA2     | 613.2483569 | -0.299464322 | 0.236145 | -1.268139 | 0.204748 | 0.283443 |
| 8019  | UBE2V1    | 3125.832244 | -0.29951935  | 0.087965 | -3.404993 | 0.000662 | 0.001617 |

|       |           |             |              |          |           |          |          |
|-------|-----------|-------------|--------------|----------|-----------|----------|----------|
| 6161  | FAM32A    | 1537.372554 | -0.299676196 | 0.071414 | -4.196339 | 2.71E-05 | 8.63E-05 |
| 13527 | TYW1B     | 86.93597526 | -0.299989387 | 0.202834 | -1.478991 | 0.139143 | 0.201625 |
| 9122  | SLC35A2   | 661.2306308 | -0.300001302 | 0.101067 | -2.968335 | 0.002994 | 0.006434 |
| 12449 | ADC       | 123.018894  | -0.300281788 | 0.164952 | -1.820423 | 0.068695 | 0.10816  |
| 15965 | PCDHA8    | 9.006917316 | -0.30049621  | 0.415301 | -0.723563 | 0.469334 | 0.576224 |
| 14198 | LBXCOR1   | 3.344741653 | -0.300520342 | 0.238877 | -1.258055 | 0.208372 | 0.287667 |
| 12718 | PCGF2     | 804.7165107 | -0.300557015 | 0.173993 | -1.727409 | 0.084094 | 0.129606 |
| 9623  | CCDC86    | 560.6635445 | -0.300569389 | 0.10845  | -2.771513 | 0.00558  | 0.011365 |
| 14311 | LYVE1     | 368.1443327 | -0.300797379 | 0.2452   | -1.226741 | 0.21992  | 0.301213 |
| 9873  | PCNA      | 1369.757888 | -0.300854706 | 0.111588 | -2.696118 | 0.007015 | 0.013928 |
| 15605 | ADAMTS1   | 46.41113021 | -0.301054271 | 0.36109  | -0.833737 | 0.404429 | 0.507927 |
| 6599  | DCP1B     | 344.7285085 | -0.301139972 | 0.07559  | -3.983848 | 6.78E-05 | 0.000201 |
| 8071  | IFT52     | 633.3904786 | -0.301399709 | 0.08906  | -3.384225 | 0.000714 | 0.001734 |
| 8351  | YIPF1     | 644.2361096 | -0.301463894 | 0.092066 | -3.274449 | 0.001059 | 0.002485 |
| 9805  | GTF2H5    | 547.394703  | -0.301545116 | 0.111059 | -2.715191 | 0.006624 | 0.013241 |
| 12107 | PPIL3     | 400.1969505 | -0.301566341 | 0.156505 | -1.926884 | 0.053994 | 0.087415 |
| 11986 | NDUFAF3   | 1034.128934 | -0.301681317 | 0.153589 | -1.964213 | 0.049505 | 0.080957 |
| 9739  | TBC1D9B   | 4304.984029 | -0.301723464 | 0.110247 | -2.736789 | 0.006204 | 0.012487 |
| 9539  | ZNF646    | 487.738341  | -0.301745118 | 0.107648 | -2.803078 | 0.005062 | 0.010401 |
| 15480 | ARGFXP2   | 1.356092555 | -0.302110887 | 0.348668 | -0.866471 | 0.386232 | 0.489052 |
| 12358 | SSSCA1    | 336.7910419 | -0.302282279 | 0.163568 | -1.848052 | 0.064595 | 0.102454 |
| 10683 | DFFB      | 80.79462916 | -0.302297329 | 0.125862 | -2.401818 | 0.016314 | 0.029932 |
| 15283 | IRX5      | 151.7706827 | -0.302354447 | 0.32675  | -0.925338 | 0.35479  | 0.455031 |
| 13477 | CNTD1     | 30.50711255 | -0.30240189  | 0.202207 | -1.495506 | 0.134783 | 0.196028 |
| 11654 | GIGYF1    | 1219.47473  | -0.302434571 | 0.146841 | -2.059612 | 0.039436 | 0.066327 |
| 12225 | TRMT61A   | 377.6703218 | -0.302475834 | 0.16001  | -1.890352 | 0.058711 | 0.094135 |
| 12794 | ZNF83     | 1541.668411 | -0.302492971 | 0.177288 | -1.706227 | 0.087966 | 0.134768 |
| 14774 | FAM7A3    | 8.683741538 | -0.30288475  | 0.281562 | -1.075732 | 0.282047 | 0.374198 |
| 10150 | SAAL1     | 168.8267421 | -0.30295544  | 0.116576 | -2.598782 | 0.009356 | 0.018068 |
| 13136 | RGS14     | 795.3324246 | -0.302995542 | 0.189637 | -1.597762 | 0.110096 | 0.164281 |
| 13038 | RIBC1     | 51.78848173 | -0.303040437 | 0.185605 | -1.63272  | 0.102528 | 0.154138 |
| 11092 | GMPPB     | 270.807754  | -0.303119422 | 0.134247 | -2.257921 | 0.023951 | 0.042324 |
| 9940  | CD2BP2    | 1685.640515 | -0.303176035 | 0.113388 | -2.673792 | 0.0075   | 0.014789 |
| 11550 | RPS6      | 29036.11937 | -0.303330173 | 0.144642 | -2.097113 | 0.035984 | 0.061066 |
| 8973  | PSMA4     | 1994.428999 | -0.303337561 | 0.100348 | -3.022863 | 0.002504 | 0.00547  |
| 16698 | DC1001328 | 0.520458602 | -0.303397236 | 0.583744 | -0.519744 | 0.603242 | 0.708118 |
| 12574 | RPL13P5   | 27.81075488 | -0.303477328 | 0.170477 | -1.780164 | 0.075049 | 0.11699  |
| 13290 | TRIM45    | 92.28417557 | -0.303558265 | 0.196318 | -1.546255 | 0.122043 | 0.179997 |
| 13186 | FBXO25    | 728.7130747 | -0.303572548 | 0.191661 | -1.583902 | 0.113216 | 0.168296 |
| 13228 | WASH7P    | 1195.094357 | -0.303636915 | 0.193122 | -1.572256 | 0.115891 | 0.171725 |
| 9741  | CETN2     | 1371.730252 | -0.303700586 | 0.111024 | -2.735445 | 0.00623  | 0.012535 |
| 7789  | DDX55     | 407.293283  | -0.303989002 | 0.086734 | -3.50484  | 0.000457 | 0.00115  |
| 13381 | PFKP      | 9084.572991 | -0.304212371 | 0.20052  | -1.517117 | 0.129237 | 0.189312 |
| 13479 | SHF       | 77.81112371 | -0.304257831 | 0.203512 | -1.495034 | 0.134906 | 0.196178 |
| 15263 | CPA3      | 178.3537053 | -0.304454766 | 0.32736  | -0.93003  | 0.352356 | 0.452501 |
| 10366 | QARS      | 2747.957451 | -0.304606743 | 0.120826 | -2.521042 | 0.011701 | 0.022125 |
| 14294 | GPR77     | 22.48985845 | -0.304653107 | 0.247579 | -1.230529 | 0.218499 | 0.299612 |

|       |           |             |              |          |           |          |          |
|-------|-----------|-------------|--------------|----------|-----------|----------|----------|
| 9325  | KIAA0090  | 1339.611002 | -0.304878778 | 0.105473 | -2.890575 | 0.003845 | 0.008083 |
| 12512 | MSX1      | 88.92617239 | -0.304914134 | 0.169393 | -1.800042 | 0.071854 | 0.112565 |
| 9671  | MLLT1     | 1142.971934 | -0.305141033 | 0.110715 | -2.756102 | 0.005849 | 0.011856 |
| 13299 | CD93      | 5483.453748 | -0.305509219 | 0.197999 | -1.542985 | 0.122834 | 0.181028 |
| 11178 | ACOT8     | 381.4113316 | -0.30561212  | 0.137055 | -2.229853 | 0.025757 | 0.045166 |
| 14070 | BVES      | 78.25785306 | -0.305723309 | 0.235765 | -1.296727 | 0.194725 | 0.271273 |
| 10563 | SYMPK     | 1652.149774 | -0.30572694  | 0.124889 | -2.447987 | 0.014366 | 0.026657 |
| 12770 | PWWP2B    | 156.3798687 | -0.305777323 | 0.178457 | -1.713456 | 0.086629 | 0.132969 |
| 13384 | CTAGE9    | 218.0938201 | -0.305816665 | 0.201728 | -1.515984 | 0.129523 | 0.189688 |
| 10236 | TNRC18    | 2217.828884 | -0.30582676  | 0.118972 | -2.57058  | 0.010153 | 0.019442 |
| 16180 | INGX      | 0.724971346 | -0.305861924 | 0.463601 | -0.659753 | 0.509412 | 0.617119 |
| 15075 | PNMAL1    | 298.869503  | -0.306112166 | 0.310739 | -0.985109 | 0.324571 | 0.422017 |
| 14795 | ATF3      | 1696.701819 | -0.306378456 | 0.286972 | -1.067626 | 0.285689 | 0.378493 |
| 10802 | CEP72     | 49.08438865 | -0.306750941 | 0.129948 | -2.360562 | 0.018247 | 0.033111 |
| 16554 | LCNL1     | 0.833977733 | -0.307451242 | 0.550433 | -0.558563 | 0.57646  | 0.682566 |
| 14695 | LOC728264 | 283.3291382 | -0.307507145 | 0.279251 | -1.101186 | 0.270816 | 0.361229 |
| 17017 | XIRP2     | 0.582833259 | -0.307509722 | 0.704384 | -0.436566 | 0.662426 | 0.763015 |
| 11352 | CLTCL1    | 158.4599338 | -0.307555234 | 0.142033 | -2.165385 | 0.030358 | 0.052418 |
| 11425 | ITGB1     | 16241.88491 | -0.307656566 | 0.143732 | -2.140489 | 0.032315 | 0.055441 |
| 9087  | PRDM15    | 154.3638257 | -0.307731962 | 0.103153 | -2.983258 | 0.002852 | 0.006152 |
| 9089  | MSN       | 16331.01947 | -0.307774642 | 0.103186 | -2.982706 | 0.002857 | 0.006162 |
| 11611 | GRK5      | 462.2382669 | -0.307905392 | 0.148211 | -2.077473 | 0.037758 | 0.063741 |
| 15760 | GPR182    | 4.598379166 | -0.308211168 | 0.391655 | -0.786946 | 0.431313 | 0.536432 |
| 13516 | DUSP5     | 609.4053941 | -0.308296938 | 0.208029 | -1.481991 | 0.138343 | 0.200626 |
| 14092 | TIGD3     | 7.936267466 | -0.308400524 | 0.239053 | -1.290094 | 0.197018 | 0.274039 |
| 8059  | C9orf25   | 768.355979  | -0.308549177 | 0.091007 | -3.390373 | 0.000698 | 0.001698 |
| 6705  | UBE2Z     | 2970.218966 | -0.308562675 | 0.078319 | -3.939842 | 8.15E-05 | 0.000238 |
| 13832 | LOC344967 | 5.102074478 | -0.30875707  | 0.224747 | -1.373799 | 0.169504 | 0.2402   |
| 9923  | PDCD6     | 2129.264963 | -0.308848877 | 0.115275 | -2.679244 | 0.007379 | 0.014576 |
| 13632 | FAM70B    | 157.5508646 | -0.308875973 | 0.213978 | -1.443493 | 0.148882 | 0.214072 |
| 10994 | ZNF517    | 190.8063323 | -0.308895416 | 0.134892 | -2.289938 | 0.022025 | 0.039269 |
| 8389  | ANXA5     | 9652.062661 | -0.309006038 | 0.09495  | -3.254422 | 0.001136 | 0.002655 |
| 9849  | PMS2L1    | 273.9048802 | -0.309007334 | 0.114258 | -2.704461 | 0.006842 | 0.013616 |
| 10171 | VMAC      | 60.31949558 | -0.309372584 | 0.119305 | -2.593133 | 0.009511 | 0.018328 |
| 11561 | C10orf11  | 148.5848577 | -0.309532047 | 0.147853 | -2.093509 | 0.036304 | 0.061551 |
| 9687  | PREB      | 1282.830861 | -0.309553379 | 0.112568 | -2.749913 | 0.005961 | 0.012062 |
| 12801 | FLJ44635  | 29.35370679 | -0.309665355 | 0.181797 | -1.70336  | 0.088501 | 0.135513 |
| 10406 | LAMC1     | 7519.449563 | -0.309715326 | 0.12351  | -2.507618 | 0.012155 | 0.022895 |
| 10310 | TCTN1     | 1092.827771 | -0.309973167 | 0.121922 | -2.542383 | 0.01101  | 0.020932 |
| 11864 | C19orf6   | 2499.287036 | -0.310055357 | 0.154862 | -2.002133 | 0.04527  | 0.074793 |
| 14922 | VASH2     | 45.6607685  | -0.310092388 | 0.301068 | -1.029973 | 0.303022 | 0.398046 |
| 11511 | NFKBIB    | 459.7801643 | -0.310143663 | 0.146826 | -2.112327 | 0.034658 | 0.059017 |
| 13154 | FAM131B   | 37.86398613 | -0.310315191 | 0.194791 | -1.593069 | 0.111145 | 0.165606 |
| 13979 | MRPL42P5  | 8.917397016 | -0.310351099 | 0.234322 | -1.324467 | 0.185348 | 0.25989  |
| 12318 | RARA      | 1471.760688 | -0.310453873 | 0.166948 | -1.859589 | 0.062944 | 0.100159 |
| 11139 | NDUFB11   | 1390.238218 | -0.310480682 | 0.138613 | -2.239915 | 0.025096 | 0.044162 |
| 11834 | DNAJB2    | 2217.675528 | -0.310491868 | 0.154495 | -2.009724 | 0.04446  | 0.073641 |

|       |           |             |              |          |           |          |          |
|-------|-----------|-------------|--------------|----------|-----------|----------|----------|
| 14309 | NEXN      | 304.9083897 | -0.310643908 | 0.2532   | -1.226872 | 0.219871 | 0.301187 |
| 14836 | ST7OT4    | 2.167962998 | -0.310699986 | 0.294222 | -1.056004 | 0.290966 | 0.384418 |
| 7108  | CCT7      | 4126.169166 | -0.310700221 | 0.082169 | -3.781219 | 0.000156 | 0.00043  |
| 16838 | CMA1      | 1.262531067 | -0.31095202  | 0.647136 | -0.480505 | 0.630868 | 0.734389 |
| 13495 | EPHB6     | 227.3268689 | -0.310978913 | 0.208785 | -1.489466 | 0.136365 | 0.19805  |
| 7962  | MTMR14    | 742.6145252 | -0.310999728 | 0.090848 | -3.423305 | 0.000619 | 0.001523 |
| 9550  | DDA1      | 630.7115575 | -0.31110266  | 0.111044 | -2.801614 | 0.005085 | 0.010436 |
| 11660 | MDP1      | 257.3818595 | -0.311153847 | 0.151101 | -2.059244 | 0.039471 | 0.066352 |
| 14960 | SCGB3A1   | 6.712310702 | -0.311289312 | 0.305564 | -1.018735 | 0.308329 | 0.403981 |
| 11838 | TRAF4     | 749.4026308 | -0.311310127 | 0.154935 | -2.00929  | 0.044506 | 0.073697 |
| 16099 | CTSE      | 23.3311955  | -0.311425163 | 0.457178 | -0.681191 | 0.495751 | 0.603591 |
| 10986 | NADSYN1   | 1182.677612 | -0.311512225 | 0.135924 | -2.291806 | 0.021917 | 0.039104 |
| 14990 | AKR1C2    | 296.7242794 | -0.311518612 | 0.308508 | -1.009757 | 0.312612 | 0.408773 |
| 14830 | NR1I2     | 7.864871118 | -0.311550032 | 0.294706 | -1.057157 | 0.29044  | 0.383852 |
| 10881 | DCBLD1    | 265.1656057 | -0.311771478 | 0.133884 | -2.328676 | 0.019876 | 0.035805 |
| 7098  | MED26     | 200.0485821 | -0.311960576 | 0.082452 | -3.783525 | 0.000155 | 0.000427 |
| 9055  | HSPC157   | 208.308765  | -0.312003619 | 0.104159 | -2.995443 | 0.00274  | 0.005932 |
| 9114  | GNL3      | 796.2873462 | -0.312214005 | 0.105004 | -2.973346 | 0.002946 | 0.006335 |
| 8711  | PPP1R7    | 1243.241487 | -0.312358917 | 0.09992  | -3.126097 | 0.001771 | 0.003986 |
| 14125 | BRIP1     | 39.89990975 | -0.312449486 | 0.244124 | -1.279881 | 0.200587 | 0.278351 |
| 10129 | LOC148413 | 256.7967137 | -0.312549258 | 0.11995  | -2.605666 | 0.00917  | 0.017743 |
| 11573 | TBL3      | 865.4348672 | -0.312670039 | 0.149502 | -2.091414 | 0.036491 | 0.061804 |
| 11673 | SRD5A1    | 396.944138  | -0.312690838 | 0.151983 | -2.057405 | 0.039647 | 0.066575 |
| 15049 | ABCB4     | 123.7687709 | -0.31270619  | 0.315702 | -0.990512 | 0.321924 | 0.419299 |
| 7316  | NDE1      | 306.7513715 | -0.312710388 | 0.084646 | -3.694334 | 0.00022  | 0.000591 |
| 8007  | GLT8D1    | 837.9610477 | -0.31283096  | 0.091822 | -3.406912 | 0.000657 | 0.001608 |
| 11506 | C9orf89   | 284.6760525 | -0.312863499 | 0.147983 | -2.11418  | 0.0345   | 0.058772 |
| 6450  | DKC1      | 854.0110056 | -0.312892043 | 0.077281 | -4.048733 | 5.15E-05 | 0.000156 |
| 9802  | WBSCR16   | 1187.97291  | -0.312970221 | 0.115221 | -2.71626  | 0.006602 | 0.013203 |
| 8575  | CPSF3     | 768.1520663 | -0.313078967 | 0.098431 | -3.180695 | 0.001469 | 0.003358 |
| 13517 | NOVA2     | 125.8241229 | -0.3132082   | 0.211352 | -1.481926 | 0.13836  | 0.200636 |
| 14714 | KCNAB3    | 12.01284965 | -0.313265189 | 0.286589 | -1.093083 | 0.274357 | 0.36548  |
| 12298 | TRIM14    | 1258.594802 | -0.313316286 | 0.167858 | -1.86656  | 0.061963 | 0.098759 |
| 9656  | CNTROB    | 596.863342  | -0.313490674 | 0.113481 | -2.762494 | 0.005736 | 0.011644 |
| 16326 | ADAD2     | 0.917111573 | -0.313501828 | 0.505155 | -0.620606 | 0.534859 | 0.642113 |
| 10693 | TMEM81    | 53.9387453  | -0.313711683 | 0.130745 | -2.399415 | 0.016421 | 0.030101 |
| 11076 | FMNL3     | 1663.225051 | -0.313719733 | 0.138559 | -2.264168 | 0.023564 | 0.0417   |
| 8865  | POLR3H    | 930.1029784 | -0.313854567 | 0.102416 | -3.064506 | 0.00218  | 0.004821 |
| 14110 | RTDR1     | 58.36436407 | -0.313880321 | 0.244452 | -1.284018 | 0.199136 | 0.276631 |
| 10400 | TIMM50    | 811.5871431 | -0.313945912 | 0.125174 | -2.508082 | 0.012139 | 0.022882 |
| 7882  | WDR46     | 657.9361257 | -0.314143564 | 0.090872 | -3.456997 | 0.000546 | 0.001358 |
| 13821 | TSC22D3   | 8152.858929 | -0.314237915 | 0.227913 | -1.378764 | 0.167968 | 0.238212 |
| 10575 | MRPS11    | 524.8645727 | -0.314383066 | 0.128559 | -2.445439 | 0.014468 | 0.026816 |
| 16468 | NLGN4Y    | 112.8199315 | -0.314392404 | 0.540234 | -0.581956 | 0.560596 | 0.667208 |
| 13675 | NDUFS7    | 1118.067351 | -0.314484956 | 0.220064 | -1.429063 | 0.152986 | 0.219282 |
| 14898 | CRNA0020  | 9.819188761 | -0.314731969 | 0.303489 | -1.037046 | 0.299714 | 0.394328 |
| 15238 | KLHL38    | 4.489877761 | -0.314956195 | 0.336312 | -0.936501 | 0.349015 | 0.448947 |

|       |           |             |              |          |           |          |          |
|-------|-----------|-------------|--------------|----------|-----------|----------|----------|
| 8129  | KIAA1609  | 429.8712766 | -0.31496724  | 0.093746 | -3.359776 | 0.00078  | 0.001881 |
| 13682 | PRR5      | 342.2354408 | -0.31502228  | 0.220772 | -1.426915 | 0.153604 | 0.220055 |
| 15168 | CXADR     | 180.0840869 | -0.31503749  | 0.329299 | -0.956691 | 0.338723 | 0.437718 |
| 11565 | CLK2P     | 11.32923527 | -0.315049312 | 0.150519 | -2.093089 | 0.036341 | 0.061588 |
| 8146  | COG4      | 1239.156558 | -0.315057611 | 0.093932 | -3.354089 | 0.000796 | 0.001916 |
| 13691 | DOCK11    | 701.1820811 | -0.315066109 | 0.221807 | -1.420452 | 0.155476 | 0.22259  |
| 14494 | MAMDC4    | 211.2305115 | -0.315096032 | 0.269418 | -1.169544 | 0.242185 | 0.327519 |
| 13429 | LOC642826 | 97.28795938 | -0.315169699 | 0.209244 | -1.506233 | 0.132007 | 0.192678 |
| 13562 | C7orf53   | 33.79471895 | -0.31532563  | 0.215024 | -1.466465 | 0.142522 | 0.20597  |
| 12778 | ACVRL1    | 1312.278768 | -0.315552892 | 0.18436  | -1.711615 | 0.086968 | 0.133395 |
| 8828  | TYK2      | 1447.062988 | -0.315553648 | 0.10244  | -3.080376 | 0.002067 | 0.00459  |
| 16007 | RIMS4     | 4.076806686 | -0.316234395 | 0.4453   | -0.71016  | 0.477605 | 0.58484  |
| 11298 | DUS3L     | 327.1263495 | -0.316248565 | 0.145169 | -2.178485 | 0.02937  | 0.050954 |
| 11446 | ZMYND19   | 191.7426943 | -0.31625385  | 0.148077 | -2.135742 | 0.0327   | 0.055999 |
| 8959  | MBD6      | 1237.401134 | -0.316416342 | 0.104507 | -3.027704 | 0.002464 | 0.005391 |
| 13226 | LRRC6     | 114.7953058 | -0.317084963 | 0.201662 | -1.572358 | 0.115868 | 0.171716 |
| 12737 | UQCR11    | 1568.675091 | -0.317442204 | 0.184411 | -1.721388 | 0.08518  | 0.131085 |
| 8998  | EIF2B3    | 377.1174659 | -0.317450292 | 0.105349 | -3.01331  | 0.002584 | 0.005629 |
| 12582 | ARRB1     | 390.4880179 | -0.317698212 | 0.17865  | -1.778325 | 0.075351 | 0.117386 |
| 12235 | SIVA1     | 895.810105  | -0.317779347 | 0.168445 | -1.886551 | 0.059221 | 0.094874 |
| 16336 | IGLON5    | 95.80429434 | -0.317928557 | 0.515577 | -0.616647 | 0.537468 | 0.644889 |
| 6232  | NRD1      | 2660.674627 | -0.317940825 | 0.076365 | -4.163414 | 3.14E-05 | 9.86E-05 |
| 10496 | GOLT1B    | 1191.835432 | -0.318070525 | 0.128626 | -2.472832 | 0.013405 | 0.025033 |
| 13211 | CYBRD1    | 1969.674905 | -0.318186313 | 0.201843 | -1.576403 | 0.114933 | 0.170525 |
| 8323  | PSMB5     | 1749.879292 | -0.318311481 | 0.096969 | -3.282597 | 0.001029 | 0.002422 |
| 13603 | TTLL13    | 8.657877988 | -0.318381798 | 0.21876  | -1.455396 | 0.14556  | 0.20973  |
| 14653 | KCTD19    | 3.831261311 | -0.318489358 | 0.285394 | -1.115963 | 0.264438 | 0.353733 |
| 10606 | BIN3      | 369.0859897 | -0.318490028 | 0.130832 | -2.434338 | 0.014919 | 0.027572 |
| 12312 | SUZ12P    | 130.2768364 | -0.318498423 | 0.171147 | -1.860966 | 0.062749 | 0.099898 |
| 12432 | SERPINB9  | 792.434469  | -0.318614655 | 0.174412 | -1.826791 | 0.067731 | 0.10679  |
| 14308 | MFSD7     | 193.0804862 | -0.318625027 | 0.259687 | -1.22696  | 0.219838 | 0.301163 |
| 8337  | PRPF19    | 1891.699428 | -0.31873637  | 0.097242 | -3.277769 | 0.001046 | 0.00246  |
| 8845  | COPG      | 4705.127913 | -0.318742335 | 0.1037   | -3.07371  | 0.002114 | 0.004685 |
| 11927 | C6orf115  | 474.4531723 | -0.318744677 | 0.16092  | -1.980771 | 0.047617 | 0.078254 |
| 6739  | DAP3      | 1457.322055 | -0.318826193 | 0.081216 | -3.925681 | 8.65E-05 | 0.000252 |
| 15130 | LOC220594 | 125.8634529 | -0.318875707 | 0.33051  | -0.964798 | 0.334646 | 0.433536 |
| 11696 | SPR       | 1161.371342 | -0.319252922 | 0.155568 | -2.052181 | 0.040152 | 0.06729  |
| 13666 | SLC25A29  | 418.7190141 | -0.319336398 | 0.222767 | -1.433502 | 0.151715 | 0.217603 |
| 10850 | VEGFB     | 2890.828383 | -0.31938137  | 0.136543 | -2.339048 | 0.019333 | 0.034926 |
| 10600 | PNPLA2    | 1556.263241 | -0.31941698  | 0.131153 | -2.435447 | 0.014873 | 0.027503 |
| 15679 | ARMC3     | 11.94358416 | -0.319445048 | 0.392824 | -0.813201 | 0.416103 | 0.520188 |
| 7095  | PHF14     | 749.7881357 | -0.319487544 | 0.084371 | -3.78669  | 0.000153 | 0.000422 |
| 15860 | C1orf170  | 184.6098473 | -0.319560095 | 0.42294  | -0.755569 | 0.449908 | 0.55603  |
| 11711 | CORO7     | 890.4714682 | -0.319720268 | 0.155967 | -2.049919 | 0.040372 | 0.067572 |
| 13766 | TCTEX1D4  | 5.430901116 | -0.319845972 | 0.228968 | -1.396905 | 0.162442 | 0.231297 |
| 13110 | GJA9      | 6.725113102 | -0.319873243 | 0.198952 | -1.607792 | 0.107881 | 0.161295 |
| 10212 | PELP1     | 1178.283744 | -0.319964672 | 0.124154 | -2.577161 | 0.009962 | 0.01912  |

|       |           |             |              |          |           |          |          |
|-------|-----------|-------------|--------------|----------|-----------|----------|----------|
| 11030 | TTC7A     | 969.6398154 | -0.320206503 | 0.140423 | -2.2803   | 0.02259  | 0.040144 |
| 5490  | MSL3      | 544.1494727 | -0.320319863 | 0.07077  | -4.526218 | 6.00E-06 | 2.14E-05 |
| 8872  | LOC407835 | 52.39203294 | -0.320475488 | 0.104627 | -3.063042 | 0.002191 | 0.004841 |
| 14347 | TTC16     | 11.51957519 | -0.320520979 | 0.263852 | -1.214778 | 0.224451 | 0.306647 |
| 13424 | RASL11A   | 358.2795753 | -0.320727036 | 0.21282  | -1.507031 | 0.131803 | 0.192451 |
| 14276 | C10orf125 | 202.5845697 | -0.320898515 | 0.259771 | -1.235314 | 0.216714 | 0.297528 |
| 13933 | C11orf9   | 1044.367953 | -0.320899629 | 0.239386 | -1.340513 | 0.180079 | 0.253335 |
| 7579  | FAM105B   | 760.5608837 | -0.321127713 | 0.089557 | -3.585749 | 0.000336 | 0.000869 |
| 9419  | CASP10    | 610.957477  | -0.321197947 | 0.11266  | -2.851037 | 0.004358 | 0.009068 |
| 10791 | PLXNB2    | 8720.600997 | -0.321496403 | 0.135927 | -2.365211 | 0.01802  | 0.032732 |
| 16370 | CD1B      | 2.26534701  | -0.321509291 | 0.528871 | -0.607917 | 0.543243 | 0.650425 |
| 6651  | WDR70     | 400.0091995 | -0.321519868 | 0.08115  | -3.962025 | 7.43E-05 | 0.000219 |
| 6158  | RUFY1     | 1476.049884 | -0.321718448 | 0.07662  | -4.198862 | 2.68E-05 | 8.54E-05 |
| 9221  | PTPN2     | 515.8859129 | -0.321739897 | 0.109809 | -2.929999 | 0.00339  | 0.007205 |
| 14206 | HIGD1B    | 80.14128563 | -0.32177755  | 0.256469 | -1.254643 | 0.209608 | 0.289211 |
| 13256 | CDK6      | 1198.573102 | -0.321864853 | 0.206068 | -1.561932 | 0.118304 | 0.17493  |
| 12911 | TRAF1     | 456.4156365 | -0.32204913  | 0.192772 | -1.67062  | 0.094797 | 0.143917 |
| 14193 | CPVL      | 1998.256419 | -0.322494996 | 0.256053 | -1.259488 | 0.207854 | 0.287054 |
| 11019 | TEAD3     | 382.5845774 | -0.322766393 | 0.141294 | -2.284359 | 0.02235  | 0.039758 |
| 11188 | WARS      | 3429.205081 | -0.323132075 | 0.145209 | -2.225288 | 0.026062 | 0.04566  |
| 11109 | NCAPH2    | 808.2828163 | -0.323556939 | 0.143834 | -2.24951  | 0.02448  | 0.043193 |
| 8223  | CDC42SE1  | 2033.081958 | -0.323787061 | 0.097451 | -3.322564 | 0.000892 | 0.002126 |
| 11119 | EIF2C2    | 162.412878  | -0.323981425 | 0.144272 | -2.245628 | 0.024728 | 0.043591 |
| 8515  | ATRIP     | 128.0800958 | -0.324069063 | 0.10129  | -3.199403 | 0.001377 | 0.00317  |
| 11099 | LSM5      | 615.3954383 | -0.324173512 | 0.143769 | -2.254826 | 0.024144 | 0.042639 |
| 8474  | TAF15     | 2176.936654 | -0.324257556 | 0.100769 | -3.217834 | 0.001292 | 0.002988 |
| 8412  | C3orf10   | 2336.141472 | -0.3242591   | 0.099918 | -3.24525  | 0.001173 | 0.002734 |
| 16053 | C15orf5   | 0.653936614 | -0.324327812 | 0.465433 | -0.69683  | 0.485909 | 0.593304 |
| 6258  | PSMD3     | 2036.743824 | -0.324870084 | 0.078257 | -4.151337 | 3.31E-05 | 0.000104 |
| 6336  | DDX27     | 963.3667628 | -0.325072246 | 0.079092 | -4.110065 | 3.96E-05 | 0.000122 |
| 10574 | MAGOHB    | 255.920188  | -0.325132807 | 0.132943 | -2.445658 | 0.014459 | 0.026802 |
| 16549 | C17orf78  | 0.445371633 | -0.325147885 | 0.581794 | -0.558871 | 0.57625  | 0.682463 |
| 10752 | TMEM102   | 174.6824162 | -0.325238441 | 0.136648 | -2.380111 | 0.017307 | 0.031552 |
| 15018 | KIAA1211  | 74.89821952 | -0.325343685 | 0.324319 | -1.003159 | 0.315784 | 0.412151 |
| 12617 | ZNF775    | 64.11378302 | -0.325368621 | 0.184127 | -1.767086 | 0.077214 | 0.119957 |
| 4718  | PSMF1     | 3179.289827 | -0.325414366 | 0.066095 | -4.923462 | 8.50E-07 | 3.53E-06 |
| 8904  | ELMOD3    | 290.8607814 | -0.325462418 | 0.106686 | -3.050668 | 0.002283 | 0.005026 |
| 7589  | NCSTN     | 3459.354862 | -0.325495989 | 0.090838 | -3.583251 | 0.000339 | 0.000876 |
| 16564 | ST8SIA6   | 44.50613111 | -0.325543537 | 0.586161 | -0.555383 | 0.578633 | 0.684725 |
| 9754  | CSNK2A2   | 693.6750255 | -0.325548926 | 0.119178 | -2.73162  | 0.006302 | 0.012665 |
| 11792 | DOK4      | 1686.651042 | -0.325566846 | 0.160838 | -2.024185 | 0.042951 | 0.071395 |
| 9887  | ATP13A1   | 1413.140962 | -0.325655017 | 0.121001 | -2.691337 | 0.007117 | 0.014109 |
| 10296 | C11orf67  | 286.205304  | -0.326061718 | 0.127985 | -2.547665 | 0.010845 | 0.020646 |
| 11071 | DCUN1D3   | 353.943316  | -0.326072313 | 0.143939 | -2.265346 | 0.023491 | 0.041587 |
| 9099  | FAM104B   | 224.0439202 | -0.326300944 | 0.109627 | -2.976477 | 0.002916 | 0.006281 |
| 8516  | VARS      | 1287.857257 | -0.326424701 | 0.10204  | -3.198979 | 0.001379 | 0.003174 |
| 11418 | LOC728613 | 271.2354408 | -0.326462453 | 0.152343 | -2.142945 | 0.032118 | 0.055135 |

|       |           |             |              |          |           |          |          |
|-------|-----------|-------------|--------------|----------|-----------|----------|----------|
| 6569  | EIF2S2    | 1431.846782 | -0.326485291 | 0.081701 | -3.996103 | 6.44E-05 | 0.000192 |
| 12954 | MMP15     | 802.2457564 | -0.326682903 | 0.197397 | -1.654953 | 0.097934 | 0.148186 |
| 11145 | DPY19L1   | 1137.215423 | -0.326784901 | 0.145942 | -2.23915  | 0.025146 | 0.044223 |
| 12316 | LRRC32    | 2720.923282 | -0.32683451  | 0.175704 | -1.86014  | 0.062866 | 0.100051 |
| 7061  | FADD      | 569.1092925 | -0.326885012 | 0.086085 | -3.797224 | 0.000146 | 0.000406 |
| 9398  | C14orf179 | 328.4926803 | -0.3269087   | 0.114312 | -2.859793 | 0.004239 | 0.008841 |
| 16308 | LPPR5     | 163.8072129 | -0.326957833 | 0.522542 | -0.625706 | 0.531508 | 0.638833 |
| 10187 | RPUSD3    | 304.8304275 | -0.327270185 | 0.126537 | -2.586364 | 0.009699 | 0.018663 |
| 10224 | NR1H2     | 1848.203512 | -0.327356971 | 0.127221 | -2.573144 | 0.010078 | 0.019323 |
| 15363 | DDN       | 8.281069657 | -0.3277599   | 0.363466 | -0.901761 | 0.367184 | 0.468474 |
| 14244 | PRRT2     | 96.86008584 | -0.328020934 | 0.263783 | -1.243527 | 0.213674 | 0.294034 |
| 9975  | MRPL37    | 1523.759971 | -0.32829994  | 0.123342 | -2.661709 | 0.007775 | 0.015277 |
| 11162 | SLC9A1    | 924.287306  | -0.32835227  | 0.147001 | -2.233674 | 0.025505 | 0.044787 |
| 16292 | MT1H      | 25.57489749 | -0.328623744 | 0.522486 | -0.628962 | 0.529374 | 0.636854 |
| 10487 | DGKQ      | 276.3328649 | -0.32866975  | 0.13273  | -2.476225 | 0.013278 | 0.024818 |
| 14087 | TCEAL7    | 45.39485925 | -0.328677996 | 0.254365 | -1.292149 | 0.196306 | 0.273145 |
| 12021 | SPSB3     | 801.1559751 | -0.328709755 | 0.168113 | -1.955288 | 0.050549 | 0.082424 |
| 9364  | CDC37     | 3062.73899  | -0.328747271 | 0.114373 | -2.874348 | 0.004049 | 0.008475 |
| 15155 | C10orf116 | 2975.823967 | -0.329021242 | 0.343263 | -0.95851  | 0.337806 | 0.436879 |
| 14151 | CCDC65    | 31.17890457 | -0.329040785 | 0.258823 | -1.271298 | 0.203623 | 0.282044 |
| 11559 | SLC25A26  | 354.7260021 | -0.329299248 | 0.157267 | -2.09388  | 0.036271 | 0.061505 |
| 15746 | MORN5     | 3.687652913 | -0.329669646 | 0.416764 | -0.791023 | 0.428931 | 0.533943 |
| 9740  | SERPINB1  | 1517.924421 | -0.330042355 | 0.120634 | -2.735909 | 0.006221 | 0.012519 |
| 13557 | TMEM86A   | 362.1321541 | -0.330062956 | 0.224755 | -1.468542 | 0.141957 | 0.205244 |
| 12930 | RASL12    | 329.318109  | -0.330128562 | 0.198318 | -1.664642 | 0.095984 | 0.145506 |
| 9090  | RSU1      | 1865.54813  | -0.330290093 | 0.110741 | -2.982559 | 0.002858 | 0.006164 |
| 15204 | CREG2     | 17.33882755 | -0.330364061 | 0.349204 | -0.94605  | 0.344123 | 0.443644 |
| 12198 | C20orf135 | 134.5463009 | -0.330367031 | 0.174153 | -1.896992 | 0.057829 | 0.092926 |
| 12374 | TMCC1     | 2271.336009 | -0.330562724 | 0.179368 | -1.842934 | 0.065339 | 0.1035   |
| 13333 | CSRP2     | 1027.016683 | -0.330649406 | 0.215687 | -1.533007 | 0.125274 | 0.184167 |
| 11095 | TOMM40    | 954.9591507 | -0.330840129 | 0.146596 | -2.256812 | 0.02402  | 0.042435 |
| 12013 | MIB2      | 446.574598  | -0.330923344 | 0.169122 | -1.956715 | 0.050381 | 0.082203 |
| 13848 | LOC646851 | 46.99413345 | -0.331137373 | 0.241917 | -1.368803 | 0.171061 | 0.242126 |
| 12965 | CCDC84    | 141.0766355 | -0.331222409 | 0.200315 | -1.653504 | 0.098228 | 0.148505 |
| 6134  | CAMKK2    | 1430.221818 | -0.331300507 | 0.078758 | -4.206585 | 2.59E-05 | 8.28E-05 |
| 6771  | TRIAP1    | 471.5121017 | -0.331308547 | 0.084734 | -3.90999  | 9.23E-05 | 0.000267 |
| 11558 | CHRNB1    | 351.5776735 | -0.331343092 | 0.158198 | -2.094481 | 0.036217 | 0.06142  |
| 11875 | EMP2      | 1033.556572 | -0.331366473 | 0.165839 | -1.998123 | 0.045703 | 0.075438 |
| 11584 | ATF7IP2   | 122.6746277 | -0.331459363 | 0.158737 | -2.0881   | 0.036789 | 0.062249 |
| 11399 | GLRX2     | 123.4240578 | -0.331511337 | 0.154178 | -2.150187 | 0.03154  | 0.054235 |
| 14224 | ASPHD2    | 152.3546551 | -0.331878639 | 0.265303 | -1.250942 | 0.210955 | 0.290702 |
| 10344 | ANXA6     | 4152.686656 | -0.332000489 | 0.131178 | -2.530913 | 0.011377 | 0.021558 |
| 12331 | CCS       | 653.6944153 | -0.332106407 | 0.179021 | -1.855128 | 0.063578 | 0.101062 |
| 7492  | WDR55     | 607.5643377 | -0.332163649 | 0.091771 | -3.619503 | 0.000295 | 0.000772 |
| 11005 | MOB2      | 520.0601349 | -0.332420143 | 0.145296 | -2.287876 | 0.022145 | 0.039439 |
| 8771  | NOP10     | 1090.444193 | -0.332493677 | 0.107416 | -3.095379 | 0.001966 | 0.004393 |
| 11034 | RGS12     | 963.7694361 | -0.3325301   | 0.145893 | -2.27927  | 0.022651 | 0.040238 |



|       |           |             |              |          |           |          |          |
|-------|-----------|-------------|--------------|----------|-----------|----------|----------|
| 11528 | PKD1      | 1488.496702 | -0.332551806 | 0.157719 | -2.108505 | 0.034987 | 0.059489 |
| 9386  | PKIG      | 1268.720352 | -0.332577285 | 0.116084 | -2.864967 | 0.004171 | 0.008709 |
| 7252  | ATXN7L3   | 1009.348205 | -0.332593347 | 0.089317 | -3.723731 | 0.000196 | 0.000531 |
| 16443 | TAC4      | 0.436916688 | -0.332666494 | 0.565208 | -0.588573 | 0.556147 | 0.66296  |
| 9681  | TMEM93    | 296.5952582 | -0.332829284 | 0.120899 | -2.752957 | 0.005906 | 0.011958 |
| 9625  | LOC728643 | 64.78718495 | -0.3328522   | 0.120161 | -2.770045 | 0.005605 | 0.011414 |
| 11361 | ABHD14B   | 1933.028596 | -0.332922429 | 0.153906 | -2.163158 | 0.030529 | 0.052671 |
| 10912 | GDF11     | 211.3299325 | -0.332977265 | 0.143739 | -2.316546 | 0.020528 | 0.036875 |
| 10218 | SUN2      | 3857.446632 | -0.333181319 | 0.129378 | -2.575255 | 0.010017 | 0.019215 |
| 8873  | MYO1E     | 1643.712048 | -0.333396411 | 0.108851 | -3.062858 | 0.002192 | 0.004843 |
| 15265 | PIWIL1    | 1.810660882 | -0.333521395 | 0.358746 | -0.929686 | 0.352534 | 0.45267  |
| 9165  | PCSK7     | 695.7816103 | -0.333612257 | 0.112982 | -2.952802 | 0.003149 | 0.006735 |
| 10992 | RPTOR     | 888.3021383 | -0.333726559 | 0.145736 | -2.289941 | 0.022025 | 0.039269 |
| 14968 | ST18      | 5.20152423  | -0.333887392 | 0.328491 | -1.016428 | 0.309426 | 0.405201 |
| 13729 | C4orf39   | 38.28110614 | -0.333921238 | 0.237313 | -1.407092 | 0.1594   | 0.22756  |
| 13623 | DNA2      | 84.89857487 | -0.33437961  | 0.230989 | -1.447599 | 0.147729 | 0.212549 |
| 12609 | AVP11     | 175.0224256 | -0.33438242  | 0.189061 | -1.768648 | 0.076953 | 0.119619 |
| 15806 | KIF5A     | 4.876771874 | -0.334766891 | 0.432593 | -0.773861 | 0.439013 | 0.544385 |
| 12333 | PAOX      | 191.0086616 | -0.334827167 | 0.180604 | -1.853927 | 0.06375  | 0.101318 |
| 10217 | CTSL1     | 5484.311608 | -0.335015177 | 0.130048 | -2.576096 | 0.009992 | 0.01917  |
| 15187 | C20orf54  | 104.8721467 | -0.335105949 | 0.352077 | -0.951798 | 0.341199 | 0.440367 |
| 8709  | NACAP1    | 124.9954156 | -0.335176773 | 0.107194 | -3.126818 | 0.001767 | 0.003977 |
| 13685 | KYNU      | 223.0382242 | -0.335193099 | 0.235344 | -1.424268 | 0.154369 | 0.221102 |
| 11054 | FAM55C    | 381.2732315 | -0.335419304 | 0.147562 | -2.273069 | 0.023022 | 0.040823 |
| 10223 | CLN3      | 1038.256151 | -0.335532464 | 0.130399 | -2.573115 | 0.010079 | 0.019323 |
| 15353 | IHH       | 64.38030467 | -0.33560568  | 0.371234 | -0.904027 | 0.365981 | 0.467244 |
| 12493 | TMEM97    | 318.5368203 | -0.335634408 | 0.185821 | -1.806223 | 0.070884 | 0.111213 |
| 9576  | PGS1      | 570.964873  | -0.335713862 | 0.120356 | -2.789341 | 0.005282 | 0.010811 |
| 13883 | GNRH1     | 48.68196475 | -0.335864496 | 0.248141 | -1.353521 | 0.175889 | 0.248333 |
| 9558  | LOC143188 | 21.51973781 | -0.335867574 | 0.120094 | -2.796704 | 0.005163 | 0.010587 |
| 13289 | FZD8      | 370.3946673 | -0.335903129 | 0.217172 | -1.546711 | 0.121933 | 0.179849 |
| 12391 | PYGB      | 3492.554272 | -0.336068672 | 0.182816 | -1.838287 | 0.06602  | 0.104435 |
| 14496 | RNF128    | 1925.775109 | -0.336094747 | 0.287435 | -1.169292 | 0.242286 | 0.327616 |
| 9947  | CYB561    | 1372.855054 | -0.336256915 | 0.125833 | -2.672248 | 0.007535 | 0.014847 |
| 13173 | KCNE4     | 855.9465352 | -0.336378707 | 0.211732 | -1.588699 | 0.112128 | 0.166831 |
| 12156 | TRIM16    | 395.3044744 | -0.336780089 | 0.176447 | -1.90868  | 0.056303 | 0.090787 |
| 12586 | DCHS1     | 1090.867866 | -0.337168869 | 0.189719 | -1.777201 | 0.075535 | 0.117628 |
| 13949 | INHBB     | 1742.91329  | -0.3373379   | 0.252874 | -1.334014 | 0.182199 | 0.25601  |
| 17737 | MC3R      | 0.400277583 | -0.337339386 | 1.306021 | -0.258296 | 0.796179 | 0.87985  |
| 11984 | SLC29A1   | 1498.195018 | -0.337574301 | 0.171841 | -1.964461 | 0.049477 | 0.080929 |
| 12353 | RASSF3    | 184.6752952 | -0.337607844 | 0.182617 | -1.848724 | 0.064498 | 0.102341 |
| 7103  | EIF4A3    | 1403.003447 | -0.337960272 | 0.089353 | -3.7823   | 0.000155 | 0.000429 |
| 11876 | CALD1     | 12197.87094 | -0.338155997 | 0.169314 | -1.997215 | 0.045802 | 0.075595 |
| 7501  | C20orf72  | 429.5989349 | -0.338178317 | 0.093497 | -3.616992 | 0.000298 | 0.000779 |
| 12260 | OSBPL3    | 1087.561867 | -0.338214717 | 0.179914 | -1.879869 | 0.060126 | 0.096128 |
| 12379 | FANK1     | 83.6752375  | -0.338288692 | 0.183655 | -1.841981 | 0.065478 | 0.103678 |
| 13591 | MCTP2     | 578.6249106 | -0.338487433 | 0.232218 | -1.45763  | 0.144943 | 0.209048 |

|       |           |             |              |          |           |          |          |
|-------|-----------|-------------|--------------|----------|-----------|----------|----------|
| 4720  | PSMD7     | 1523.910361 | -0.338524306 | 0.068791 | -4.921091 | 8.61E-07 | 3.57E-06 |
| 9704  | FLOT2     | 3498.498838 | -0.338611382 | 0.123331 | -2.745556 | 0.006041 | 0.012202 |
| 6430  | RIC8A     | 1816.902596 | -0.338758484 | 0.083429 | -4.060432 | 4.90E-05 | 0.000149 |
| 12070 | ZNF789    | 101.2739875 | -0.338875571 | 0.174837 | -1.938243 | 0.052594 | 0.085409 |
| 10822 | IER5      | 550.7118088 | -0.338937716 | 0.144016 | -2.353478 | 0.018599 | 0.033686 |
| 14894 | LRAT      | 73.00864896 | -0.338974909 | 0.326433 | -1.038423 | 0.299073 | 0.393591 |
| 10839 | GET4      | 826.5853897 | -0.339051907 | 0.144567 | -2.345293 | 0.019012 | 0.034381 |
| 15406 | BRD7P3    | 0.97077111  | -0.339115064 | 0.381314 | -0.889333 | 0.373824 | 0.475615 |
| 10295 | TMEM222   | 899.314178  | -0.339193229 | 0.133126 | -2.547907 | 0.010837 | 0.020633 |
| 16681 | C5orf60   | 0.262005746 | -0.33919908  | 0.648127 | -0.523353 | 0.600729 | 0.705886 |
| 16852 | PHOX2A    | 0.264282151 | -0.339199114 | 0.71     | -0.477745 | 0.632831 | 0.736063 |
| 16988 | C6orf25   | 0.243206499 | -0.339199166 | 0.767269 | -0.442087 | 0.658427 | 0.759702 |
| 17213 | C1orf87   | 0.306274241 | -0.339199182 | 0.880759 | -0.385121 | 0.700147 | 0.797259 |
| 17211 | CCDC37    | 0.182070818 | -0.339199315 | 0.879977 | -0.385464 | 0.699894 | 0.797084 |
| 17450 | CEACAM10  | 0.26296118  | -0.339199351 | 1.038487 | -0.326629 | 0.743949 | 0.835653 |
| 17404 | HIST1H2B1 | 0.205105905 | -0.339199403 | 0.997951 | -0.339896 | 0.733935 | 0.826584 |
| 17410 | OR51B4    | 0.206986434 | -0.339199406 | 1.00016  | -0.339145 | 0.7345   | 0.826935 |
| 17611 | AAA1      | 0.282168279 | -0.339199427 | 1.16454  | -0.291273 | 0.770842 | 0.857946 |
| 17563 | CACNG8    | 0.165597274 | -0.339199619 | 1.131549 | -0.299766 | 0.764356 | 0.853051 |
| 17569 | RAD21L1   | 0.16780055  | -0.339199621 | 1.133142 | -0.299344 | 0.764677 | 0.853233 |
| 17573 | AADACL4   | 0.16230859  | -0.339199625 | 1.136248 | -0.298526 | 0.765302 | 0.853615 |
| 17567 | CXorf41   | 0.145170606 | -0.339199659 | 1.133653 | -0.299209 | 0.76478  | 0.853233 |
| 17745 | C4orf40   | 0.215877396 | -0.339199727 | 1.321564 | -0.256665 | 0.797437 | 0.880801 |
| 17654 | SCRT2     | 0.160338706 | -0.339199733 | 1.218565 | -0.27836  | 0.780736 | 0.866792 |
| 17740 | SLC36A3   | 0.22825142  | -0.339199771 | 1.316112 | -0.257729 | 0.796616 | 0.880201 |
| 17659 | PSMB11    | 0.145357569 | -0.33919978  | 1.221549 | -0.27768  | 0.781258 | 0.867175 |
| 17754 | NPY2R     | 0.20585818  | -0.339199784 | 1.326558 | -0.255699 | 0.798183 | 0.881199 |
| 17738 | OR2S2     | 0.162114207 | -0.339199869 | 1.3148   | -0.257986 | 0.796418 | 0.880065 |
| 17742 | SNORA12   | 0.148136185 | -0.339199925 | 1.31922  | -0.257122 | 0.797085 | 0.880603 |
| 17748 | LOC347376 | 0.126638504 | -0.33919998  | 1.322149 | -0.256552 | 0.797525 | 0.88081  |
| 17747 | CCL1      | 0.126520915 | -0.339199981 | 1.322262 | -0.25653  | 0.797542 | 0.88081  |
| 17836 | SULT2A1   | 0.164672863 | -0.339200036 | 1.424521 | -0.238115 | 0.811792 | 0.892124 |
| 17855 | GOLGA6L1  | 0.158278858 | -0.339200064 | 1.441828 | -0.235257 | 0.814009 | 0.893444 |
| 17956 | C6orf221  | 0.123129877 | -0.339200425 | 1.572367 | -0.215726 | 0.829201 | 0.905167 |
| 17967 | TLX1NB    | 0.102900344 | -0.339200532 | 1.58976  | -0.213366 | 0.831042 | 0.90662  |
| 18056 | DDX53     | 0.105325842 | -0.339200863 | 1.744035 | -0.194492 | 0.845791 | 0.918089 |
| 18058 | OR8S1     | 0.105018575 | -0.339200864 | 1.744606 | -0.194428 | 0.845841 | 0.918089 |
| 18060 | FMR1NB    | 0.105460564 | -0.339200868 | 1.746235 | -0.194247 | 0.845983 | 0.918163 |
| 18077 | MEG8      | 0.08786131  | -0.339201014 | 1.770674 | -0.191566 | 0.848082 | 0.919581 |
| 18160 | OR52B2    | 0.088029818 | -0.339201504 | 1.966092 | -0.172526 | 0.863024 | 0.931505 |
| 18162 | APOBEC1   | 0.086485644 | -0.339201516 | 1.970399 | -0.172149 | 0.863321 | 0.931723 |
| 18368 | WFDC6     | 0.087033629 | -0.339203144 | 2.510965 | -0.135089 | 0.892542 | 0.952456 |
| 18370 | CGB8      | 0.084221486 | -0.339203186 | 2.523301 | -0.134428 | 0.893064 | 0.952909 |
| 18389 | MAGEB6    | 0.068033054 | -0.339203616 | 2.592053 | -0.130863 | 0.895884 | 0.954879 |
| 18461 | C16orf92  | 0.107227693 | -0.339204369 | 2.91407  | -0.116402 | 0.907334 | 0.962737 |
| 18465 | COX7B2    | 0.10563583  | -0.339204369 | 2.91407  | -0.116402 | 0.907334 | 0.962737 |
| 18471 | PRAC      | 0.104311035 | -0.339204369 | 2.91407  | -0.116402 | 0.907334 | 0.962737 |

|       |           |             |              |          |           |          |          |
|-------|-----------|-------------|--------------|----------|-----------|----------|----------|
| 18473 | TPRX1     | 0.084228187 | -0.339204599 | 2.910345 | -0.116551 | 0.907216 | 0.962737 |
| 18464 | CARD18    | 0.12038205  | -0.339204614 | 2.91407  | -0.116402 | 0.907334 | 0.962737 |
| 18466 | DSCR10    | 0.066569651 | -0.339204859 | 2.91407  | -0.116402 | 0.907334 | 0.962737 |
| 18463 | C6orf127  | 0.071482103 | -0.339204859 | 2.91407  | -0.116402 | 0.907334 | 0.962737 |
| 18468 | OR51B2    | 0.06675461  | -0.339204859 | 2.91407  | -0.116402 | 0.907334 | 0.962737 |
| 18462 | C2orf80   | 0.069816311 | -0.339204859 | 2.91407  | -0.116402 | 0.907334 | 0.962737 |
| 18469 | OR52K1    | 0.065649801 | -0.339204859 | 2.91407  | -0.116402 | 0.907334 | 0.962737 |
| 18470 | OR56A3    | 0.066854609 | -0.339204859 | 2.91407  | -0.116402 | 0.907334 | 0.962737 |
| 18472 | PRSS54    | 0.079565184 | -0.339204859 | 2.91407  | -0.116402 | 0.907334 | 0.962737 |
| 9726  | PKM2      | 46904.2518  | -0.339408827 | 0.123895 | -2.739481 | 0.006154 | 0.012402 |
| 10806 | WDR76     | 108.6946593 | -0.339410539 | 0.143839 | -2.35966  | 0.018292 | 0.033179 |
| 9502  | C9orf69   | 708.5259644 | -0.339542818 | 0.120424 | -2.819558 | 0.004809 | 0.00992  |
| 10042 | NPRL2     | 301.0630031 | -0.339545013 | 0.128799 | -2.636242 | 0.008383 | 0.016363 |
| 13356 | DUSP4     | 152.4571956 | -0.3395564   | 0.222666 | -1.524961 | 0.127269 | 0.186777 |
| 11933 | PLBD1     | 1085.084412 | -0.339622465 | 0.171612 | -1.979008 | 0.047815 | 0.07854  |
| 9987  | AARSD1    | 542.4832038 | -0.340147636 | 0.128016 | -2.657078 | 0.007882 | 0.01547  |
| 6359  | DAXX      | 1086.289822 | -0.340563289 | 0.083127 | -4.096894 | 4.19E-05 | 0.000129 |
| 14337 | ACR       | 8.128243972 | -0.340610362 | 0.279314 | -1.219454 | 0.222672 | 0.304429 |
| 13005 | LOC84989  | 7.371355555 | -0.340822659 | 0.207498 | -1.642535 | 0.100479 | 0.151441 |
| 14429 | ASB12     | 2.909983559 | -0.340931409 | 0.286727 | -1.189046 | 0.234421 | 0.318449 |
| 11702 | OAS1      | 1203.744999 | -0.34093721  | 0.166218 | -2.051143 | 0.040253 | 0.067426 |
| 14423 | KIR2DL1   | 3.37175474  | -0.340948334 | 0.286227 | -1.191182 | 0.233582 | 0.317441 |
| 11706 | CENPT     | 592.9636935 | -0.341073562 | 0.166346 | -2.050388 | 0.040327 | 0.067519 |
| 13754 | SNHG4     | 4.391004907 | -0.341149912 | 0.243315 | -1.402089 | 0.160889 | 0.229284 |
| 9517  | RPA3      | 403.0921586 | -0.341309614 | 0.121306 | -2.813629 | 0.004899 | 0.010089 |
| 10157 | EIF3CL    | 10371.36561 | -0.341316868 | 0.13142  | -2.597144 | 0.0094   | 0.018141 |
| 9647  | ABCC10    | 302.470087  | -0.341387466 | 0.123535 | -2.763483 | 0.005719 | 0.011615 |
| 8194  | C14orf93  | 191.3598122 | -0.341517373 | 0.102398 | -3.335204 | 0.000852 | 0.002039 |
| 9914  | RNF213    | 5092.397488 | -0.341612902 | 0.127348 | -2.68251  | 0.007307 | 0.014447 |
| 15850 | ZBBX      | 5.02210686  | -0.341642884 | 0.450579 | -0.758231 | 0.448313 | 0.554409 |
| 9604  | IGSF8     | 959.7923558 | -0.342144782 | 0.123121 | -2.778932 | 0.005454 | 0.011131 |
| 13731 | FAM19A2   | 20.03421192 | -0.34215048  | 0.243171 | -1.407034 | 0.159417 | 0.227568 |
| 9173  | EMD       | 1106.461185 | -0.342170638 | 0.116088 | -2.947511 | 0.003203 | 0.006845 |
| 15597 | FAM183B   | 1.652225242 | -0.342363639 | 0.409344 | -0.836372 | 0.402946 | 0.506388 |
| 12320 | A2M       | 30748.02688 | -0.342444047 | 0.184183 | -1.859258 | 0.062991 | 0.100217 |
| 12887 | KIAA1257  | 4.033963239 | -0.342564475 | 0.204291 | -1.676844 | 0.093573 | 0.142312 |
| 8046  | ZNF394    | 466.600653  | -0.342861401 | 0.101024 | -3.393845 | 0.000689 | 0.001679 |
| 6527  | MORC2     | 775.6958484 | -0.343126795 | 0.085462 | -4.014978 | 5.95E-05 | 0.000179 |
| 9301  | PCGF1     | 263.6958528 | -0.343180446 | 0.11831  | -2.900693 | 0.003723 | 0.007847 |
| 11177 | MCAT      | 369.8984177 | -0.343232893 | 0.153895 | -2.230306 | 0.025727 | 0.04512  |
| 14426 | LOC284837 | 14.5662028  | -0.343483627 | 0.288714 | -1.189703 | 0.234163 | 0.318164 |
| 10671 | RAP2B     | 1112.46408  | -0.343520831 | 0.142863 | -2.404543 | 0.016193 | 0.029744 |
| 17236 | LECT1     | 0.531612391 | -0.34385701  | 0.904934 | -0.37998  | 0.70396  | 0.800552 |
| 13853 | SERINC4   | 7.348930712 | -0.344128118 | 0.251627 | -1.367612 | 0.171434 | 0.242566 |
| 9884  | CREM      | 690.7271619 | -0.344517335 | 0.127919 | -2.693247 | 0.007076 | 0.014032 |
| 16892 | PABPC1P2  | 0.523127755 | -0.344517423 | 0.737207 | -0.467328 | 0.640265 | 0.742946 |
| 10727 | E4F1      | 384.8993794 | -0.344522321 | 0.144291 | -2.387693 | 0.016954 | 0.030979 |

|       |           |             |              |          |           |          |          |
|-------|-----------|-------------|--------------|----------|-----------|----------|----------|
| 10624 | DC1001296 | 207.4486041 | -0.34469847  | 0.142131 | -2.425212 | 0.015299 | 0.028227 |
| 10347 | ATSPER2F  | 26.80162489 | -0.344740856 | 0.136267 | -2.529893 | 0.01141  | 0.021614 |
| 8036  | RFC5      | 286.1047435 | -0.344761407 | 0.10149  | -3.397    | 0.000681 | 0.001662 |
| 10830 | RELB      | 560.5220562 | -0.344775636 | 0.146663 | -2.350799 | 0.018733 | 0.033905 |
| 9242  | NOC2L     | 1415.746192 | -0.345056331 | 0.118117 | -2.9213   | 0.003486 | 0.007393 |
| 6254  | HDAC1     | 1853.515333 | -0.345365024 | 0.083162 | -4.152927 | 3.28E-05 | 0.000103 |
| 10182 | C8orf33   | 1103.10741  | -0.34561883  | 0.133483 | -2.589229 | 0.009619 | 0.018517 |
| 13166 | SFMBT2    | 114.1704953 | -0.345726054 | 0.217353 | -1.590621 | 0.111695 | 0.166287 |
| 14864 | DGCR5     | 1601.641909 | -0.345801042 | 0.329789 | -1.048551 | 0.294385 | 0.388202 |
| 7498  | LYAR      | 230.0173361 | -0.34581548  | 0.09559  | -3.617688 | 0.000297 | 0.000777 |
| 12383 | SLC6A9    | 121.1940673 | -0.345850218 | 0.187851 | -1.841089 | 0.065608 | 0.103851 |
| 9537  | LAS1L     | 894.1243269 | -0.346206031 | 0.123501 | -2.803262 | 0.005059 | 0.010397 |
| 8340  | ORMDL2    | 657.2111217 | -0.346471779 | 0.105725 | -3.277112 | 0.001049 | 0.002465 |
| 6210  | NSFL1C    | 1843.35533  | -0.346606225 | 0.083065 | -4.172721 | 3.01E-05 | 9.50E-05 |
| 13138 | CCNE2     | 57.03057366 | -0.346648013 | 0.217047 | -1.597109 | 0.110241 | 0.164473 |
| 9569  | TPT1      | 88748.95563 | -0.346652778 | 0.124113 | -2.793033 | 0.005222 | 0.010696 |
| 6009  | KARS      | 2960.72712  | -0.346732706 | 0.081364 | -4.261489 | 2.03E-05 | 6.62E-05 |
| 9752  | STXBP2    | 1512.457734 | -0.347145652 | 0.127073 | -2.731869 | 0.006298 | 0.012658 |
| 10356 | LOC401010 | 24.31423102 | -0.347268103 | 0.137581 | -2.524099 | 0.0116   | 0.021955 |
| 15020 | PCDHB5    | 175.8899309 | -0.347610493 | 0.347083 | -1.00152  | 0.316576 | 0.413129 |
| 13580 | SPDYA     | 15.17105226 | -0.348432912 | 0.23847  | -1.461119 | 0.143983 | 0.207821 |
| 15179 | HES5      | 4.34272341  | -0.349045842 | 0.366125 | -0.953352 | 0.340412 | 0.439553 |
| 8105  | IAH1      | 872.4962811 | -0.349052473 | 0.10362  | -3.368582 | 0.000756 | 0.001827 |
| 11490 | SNRNP70   | 2464.270879 | -0.349270041 | 0.164435 | -2.124059 | 0.033665 | 0.05743  |
| 16148 | SNORA81   | 1.017825108 | -0.349327143 | 0.524285 | -0.666292 | 0.505224 | 0.613244 |
| 11496 | FZP686I15 | 70.25019342 | -0.349466728 | 0.164801 | -2.120533 | 0.033961 | 0.057905 |
| 15420 | RIPPLY1   | 2.148558711 | -0.349523864 | 0.395351 | -0.884085 | 0.37665  | 0.478777 |
| 8879  | ITSN1     | 919.8790814 | -0.349585461 | 0.114211 | -3.060871 | 0.002207 | 0.004872 |
| 11155 | MTBP      | 53.94588102 | -0.349600546 | 0.156332 | -2.236273 | 0.025334 | 0.044515 |
| 11368 | C3orf42   | 13.58867348 | -0.349940495 | 0.161868 | -2.161894 | 0.030626 | 0.052807 |
| 11716 | ITPKC     | 1146.082225 | -0.349952602 | 0.170876 | -2.047997 | 0.04056  | 0.067858 |
| 15397 | PRRT4     | 0.960178576 | -0.350063602 | 0.392717 | -0.891388 | 0.372721 | 0.474489 |
| 13737 | AGAP6     | 110.4195065 | -0.350181618 | 0.249195 | -1.405253 | 0.159946 | 0.228223 |
| 13599 | IED7-TICA | 181.3142076 | -0.350190745 | 0.240469 | -1.456283 | 0.145314 | 0.20945  |
| 14251 | KIAA1751  | 8.075801848 | -0.350213645 | 0.282017 | -1.241819 | 0.214303 | 0.294736 |
| 13448 | NBPF16    | 86.54546317 | -0.350250381 | 0.233177 | -1.502077 | 0.133077 | 0.193965 |
| 9959  | RABGGTA   | 466.6174858 | -0.350272686 | 0.131273 | -2.668286 | 0.007624 | 0.015005 |
| 11531 | PPP4R1L   | 103.9645153 | -0.350308334 | 0.166229 | -2.107385 | 0.035084 | 0.059638 |
| 15543 | KRT2      | 1.98865018  | -0.350568235 | 0.413203 | -0.848416 | 0.396206 | 0.499649 |
| 11784 | CDKN2C    | 598.7627343 | -0.350580988 | 0.172899 | -2.027659 | 0.042595 | 0.070851 |
| 15763 | DSC1      | 0.873579444 | -0.350705742 | 0.446126 | -0.786114 | 0.431801 | 0.536936 |
| 9390  | POLR2J4   | 246.8955821 | -0.350994561 | 0.122568 | -2.863662 | 0.004188 | 0.008742 |
| 12315 | ALKBH7    | 710.5044481 | -0.351141296 | 0.188727 | -1.86058  | 0.062804 | 0.09996  |
| 11102 | HDAC10    | 511.9703954 | -0.351167778 | 0.155785 | -2.254188 | 0.024184 | 0.042698 |
| 7782  | FBRS      | 1454.300773 | -0.351300338 | 0.100179 | -3.506733 | 0.000454 | 0.001143 |
| 12760 | BIN1      | 1473.496244 | -0.351394378 | 0.204812 | -1.715692 | 0.086218 | 0.132443 |
| 12466 | NID1      | 5621.041928 | -0.351477303 | 0.193908 | -1.812602 | 0.069893 | 0.109897 |

|       |           |             |              |          |           |          |          |
|-------|-----------|-------------|--------------|----------|-----------|----------|----------|
| 13799 | FIGNL2    | 159.9794813 | -0.351718178 | 0.253623 | -1.386773 | 0.165511 | 0.235063 |
| 13782 | ANG       | 602.5450629 | -0.35189921  | 0.252649 | -1.392839 | 0.163668 | 0.232772 |
| 7737  | XRCC1     | 668.7163958 | -0.351922051 | 0.099877 | -3.52356  | 0.000426 | 0.001079 |
| 13235 | CCNL2     | 1845.862407 | -0.351952381 | 0.224484 | -1.567829 | 0.116921 | 0.17316  |
| 12286 | CBFA2T3   | 70.36710193 | -0.35220509  | 0.188329 | -1.870155 | 0.061462 | 0.098057 |
| 16263 | SPATA21   | 0.824165829 | -0.352541416 | 0.553922 | -0.636446 | 0.524486 | 0.632137 |
| 10731 | TRAPPC2L  | 844.7829856 | -0.352862593 | 0.147819 | -2.387131 | 0.01698  | 0.031016 |
| 9614  | MRPL20    | 1129.11005  | -0.352893651 | 0.12717  | -2.774986 | 0.00552  | 0.011255 |
| 10714 | HPS4      | 1286.341143 | -0.352964723 | 0.147615 | -2.391114 | 0.016797 | 0.03073  |
| 9963  | FUT4      | 312.4987725 | -0.352967104 | 0.132352 | -2.666881 | 0.007656 | 0.015062 |
| 6717  | UFD1L     | 1039.961881 | -0.353376881 | 0.089829 | -3.933872 | 8.36E-05 | 0.000244 |
| 13668 | C11orf21  | 22.13039406 | -0.35359902  | 0.246898 | -1.432168 | 0.152096 | 0.218117 |
| 5422  | PPME1     | 1187.405575 | -0.353613511 | 0.077626 | -4.555328 | 5.23E-06 | 1.89E-05 |
| 13463 | PPP1R3G   | 118.5263581 | -0.353867972 | 0.236248 | -1.497867 | 0.134168 | 0.195337 |
| 10524 | CYHR1     | 620.2278433 | -0.353898373 | 0.143715 | -2.462497 | 0.013797 | 0.025698 |
| 12517 | B3GNT5    | 823.1930625 | -0.354029758 | 0.196819 | -1.798758 | 0.072057 | 0.112838 |
| 9635  | SGTA      | 1708.303031 | -0.354130653 | 0.127963 | -2.767443 | 0.00565  | 0.011494 |
| 11306 | EP400NL   | 87.5665349  | -0.354159758 | 0.162705 | -2.176696 | 0.029503 | 0.051149 |
| 9519  | GINS3     | 117.4714323 | -0.354246922 | 0.125923 | -2.813204 | 0.004905 | 0.0101   |
| 7627  | ITGB1BP1  | 1070.580624 | -0.3544292   | 0.099328 | -3.568263 | 0.000359 | 0.000923 |
| 9319  | TMEM216   | 183.4470357 | -0.3546813   | 0.122593 | -2.893157 | 0.003814 | 0.008022 |
| 6061  | C3orf37   | 704.2198137 | -0.354784522 | 0.0837   | -4.238783 | 2.25E-05 | 7.26E-05 |
| 13206 | LCAT      | 144.554826  | -0.354944054 | 0.224972 | -1.577728 | 0.114628 | 0.170137 |
| 5671  | ELOVL1    | 1527.692526 | -0.354944253 | 0.080006 | -4.436475 | 9.14E-06 | 3.16E-05 |
| 13435 | MRPL41    | 654.1912812 | -0.355135838 | 0.236098 | -1.504186 | 0.132534 | 0.193356 |
| 11002 | SRGAP1    | 533.6992559 | -0.355231379 | 0.155219 | -2.288579 | 0.022104 | 0.03938  |
| 9200  | LYPLA2    | 1075.663897 | -0.355443258 | 0.120979 | -2.938067 | 0.003303 | 0.007036 |
| 7467  | GNL2      | 1104.383065 | -0.355627304 | 0.097991 | -3.629196 | 0.000284 | 0.000746 |
| 7592  | CCDC127   | 646.0457456 | -0.355651384 | 0.099279 | -3.582328 | 0.000341 | 0.000879 |
| 5771  | UTP14A    | 381.5760186 | -0.355711634 | 0.08112  | -4.384988 | 1.16E-05 | 3.94E-05 |
| 10456 | PRIC285   | 839.8446122 | -0.355909191 | 0.142916 | -2.490334 | 0.012762 | 0.023924 |
| 12178 | AIM1      | 1974.902657 | -0.356020431 | 0.187071 | -1.903129 | 0.057024 | 0.091777 |
| 11017 | LOC285830 | 85.11740177 | -0.35631207  | 0.155964 | -2.284573 | 0.022338 | 0.039743 |
| 13586 | RELL2     | 45.0420745  | -0.356319071 | 0.244204 | -1.459107 | 0.144536 | 0.208527 |
| 10476 | TDRD3     | 559.5912382 | -0.356479268 | 0.143615 | -2.482186 | 0.013058 | 0.024432 |
| 8500  | NSDHL     | 463.9480323 | -0.356537019 | 0.11119  | -3.206555 | 0.001343 | 0.003098 |
| 8152  | CCDC77    | 125.1680816 | -0.356717914 | 0.106501 | -3.349439 | 0.00081  | 0.001947 |
| 5349  | NVL       | 357.8882791 | -0.356839223 | 0.077677 | -4.59386  | 4.35E-06 | 1.59E-05 |
| 4195  | VPS26B    | 1044.551166 | -0.356857466 | 0.068458 | -5.21282  | 1.86E-07 | 8.69E-07 |
| 5228  | RNF216    | 1163.917151 | -0.356937712 | 0.076515 | -4.664917 | 3.09E-06 | 1.16E-05 |
| 12948 | S1PR3     | 1328.408398 | -0.356952641 | 0.215178 | -1.658871 | 0.097142 | 0.147056 |
| 9979  | RPP40     | 70.74714743 | -0.356958305 | 0.134196 | -2.659982 | 0.007814 | 0.015349 |
| 12135 | APBB3     | 372.8505985 | -0.356975744 | 0.186297 | -1.916162 | 0.055344 | 0.089385 |
| 10071 | ZFP36L1   | 7461.952589 | -0.357096496 | 0.135893 | -2.627774 | 0.008595 | 0.016727 |
| 13043 | ATP2A3    | 822.3736067 | -0.357177027 | 0.218845 | -1.6321   | 0.102658 | 0.154275 |
| 9895  | PPP1R3F   | 85.89681378 | -0.357427954 | 0.132896 | -2.689536 | 0.007155 | 0.014174 |
| 7357  | ZNF526    | 236.5747961 | -0.35775917  | 0.097342 | -3.675272 | 0.000238 | 0.000633 |

|       |           |             |              |          |           |          |          |
|-------|-----------|-------------|--------------|----------|-----------|----------|----------|
| 14316 | GOLGA8B   | 613.3660281 | -0.357774673 | 0.291891 | -1.225711 | 0.220307 | 0.301638 |
| 8892  | WWC3      | 1660.332867 | -0.357795881 | 0.117108 | -3.055277 | 0.002249 | 0.004957 |
| 12654 | CTAGE6    | 9.64346775  | -0.357857803 | 0.203766 | -1.756221 | 0.079051 | 0.122454 |
| 9698  | AP1S1     | 978.2967729 | -0.357921475 | 0.130302 | -2.746852 | 0.006017 | 0.01216  |
| 11370 | LOC222699 | 62.78354763 | -0.358048754 | 0.16569  | -2.160955 | 0.030699 | 0.052922 |
| 8876  | POLR3D    | 339.8898254 | -0.358182853 | 0.116977 | -3.062001 | 0.002199 | 0.004855 |
| 14819 | IL17REL   | 1.563811711 | -0.358223874 | 0.338311 | -1.058858 | 0.289664 | 0.383137 |
| 14312 | FUT2      | 13.33685447 | -0.358375136 | 0.292221 | -1.226384 | 0.220054 | 0.301354 |
| 11957 | FGFBP3    | 23.97746121 | -0.358574898 | 0.18176  | -1.972797 | 0.048519 | 0.079542 |
| 6332  | CTBP1     | 2535.539148 | -0.358728697 | 0.087228 | -4.112544 | 3.91E-05 | 0.000121 |
| 9793  | DUSP14    | 495.5031734 | -0.358735954 | 0.131942 | -2.718885 | 0.00655  | 0.013111 |
| 12925 | EDNRA     | 751.5378491 | -0.358753888 | 0.215344 | -1.665957 | 0.095722 | 0.145172 |
| 12386 | NBPF14    | 287.3557209 | -0.359417052 | 0.19529  | -1.84043  | 0.065705 | 0.103979 |
| 10160 | RPSAP9    | 22.25779116 | -0.359669092 | 0.13853  | -2.596321 | 0.009423 | 0.018179 |
| 7320  | TMEM109   | 2998.064195 | -0.359687934 | 0.097428 | -3.691815 | 0.000223 | 0.000596 |
| 10102 | SPNS1     | 1034.873802 | -0.359711266 | 0.1375   | -2.616083 | 0.008894 | 0.017258 |
| 9303  | ZNF26     | 278.1477694 | -0.359726863 | 0.12404  | -2.900087 | 0.003731 | 0.00786  |
| 12873 | APLN      | 2132.201494 | -0.359740788 | 0.213494 | -1.685017 | 0.091985 | 0.140061 |
| 10242 | C17orf44  | 68.85940533 | -0.359901201 | 0.140054 | -2.569732 | 0.010178 | 0.019478 |
| 9779  | ZHX2      | 1309.508874 | -0.360048354 | 0.132234 | -2.722813 | 0.006473 | 0.012974 |
| 13981 | OC1001322 | 24.03087588 | -0.360075918 | 0.271964 | -1.323986 | 0.185508 | 0.260077 |
| 7525  | KEAP1     | 1510.282788 | -0.360325711 | 0.099928 | -3.605864 | 0.000311 | 0.00081  |
| 7111  | ZNF746    | 426.5232406 | -0.360456312 | 0.095345 | -3.780543 | 0.000156 | 0.000431 |
| 9668  | REXO1     | 675.245977  | -0.360485006 | 0.130697 | -2.758178 | 0.005812 | 0.011784 |
| 8737  | PL-5283   | 1221.219629 | -0.360604359 | 0.115823 | -3.113412 | 0.001849 | 0.004149 |
| 13028 | CYTIP     | 407.0158965 | -0.360721976 | 0.220652 | -1.634803 | 0.10209  | 0.153588 |
| 13565 | CD109     | 2493.971811 | -0.361042735 | 0.246356 | -1.465532 | 0.142776 | 0.206307 |
| 13674 | FBXO39    | 6.120645179 | -0.361203822 | 0.252755 | -1.429067 | 0.152985 | 0.219282 |
| 8195  | C3orf26   | 308.4854543 | -0.361301976 | 0.108367 | -3.334071 | 0.000856 | 0.002047 |
| 15282 | SEMA3C    | 2086.437638 | -0.361308206 | 0.390434 | -0.925401 | 0.354758 | 0.455019 |
| 4533  | FAM104A   | 572.4331584 | -0.361389057 | 0.072027 | -5.017419 | 5.24E-07 | 2.26E-06 |
| 9826  | KLHDC8B   | 448.5766575 | -0.361409481 | 0.13336  | -2.710036 | 0.006728 | 0.01342  |
| 4133  | CASP2     | 809.0204135 | -0.361590125 | 0.068724 | -5.26146  | 1.43E-07 | 6.78E-07 |
| 10824 | FAM3A     | 984.2322646 | -0.361869387 | 0.153777 | -2.353207 | 0.018612 | 0.033705 |
| 9714  | MON1A     | 155.7597466 | -0.36191892  | 0.131923 | -2.743407 | 0.006081 | 0.012269 |
| 11555 | ZAK       | 1498.219417 | -0.362170178 | 0.172788 | -2.09604  | 0.036079 | 0.061201 |
| 8090  | CD3EAP    | 288.7288898 | -0.36217063  | 0.107347 | -3.373818 | 0.000741 | 0.001796 |
| 9843  | C9orf114  | 318.3202401 | -0.362220828 | 0.133849 | -2.706192 | 0.006806 | 0.013553 |
| 12599 | GIMAP2    | 325.6206958 | -0.362230842 | 0.204233 | -1.77362  | 0.076126 | 0.118434 |
| 10766 | CENPN     | 255.3941874 | -0.362531471 | 0.152557 | -2.376362 | 0.017484 | 0.031833 |
| 10092 | FBXO5     | 107.7211415 | -0.362656483 | 0.138437 | -2.619651 | 0.008802 | 0.017096 |
| 8108  | C20orf196 | 69.85919303 | -0.362715183 | 0.107699 | -3.367858 | 0.000758 | 0.001831 |
| 14523 | LOC121952 | 1.742053711 | -0.363012968 | 0.31302  | -1.159712 | 0.246166 | 0.332239 |
| 8856  | CSNK1G2   | 1022.990348 | -0.363122037 | 0.118363 | -3.06787  | 0.002156 | 0.004772 |
| 14116 | DLX6      | 6.735396362 | -0.363405368 | 0.283463 | -1.282021 | 0.199835 | 0.277484 |
| 14456 | KIAA1984  | 25.24633896 | -0.363426905 | 0.307801 | -1.180722 | 0.237713 | 0.322317 |
| 14510 | MAMDC2    | 49.34941066 | -0.363539554 | 0.312475 | -1.163418 | 0.24466  | 0.330502 |

|       |           |             |              |          |           |          |          |
|-------|-----------|-------------|--------------|----------|-----------|----------|----------|
| 8718  | ZNF133    | 271.121814  | -0.363541915 | 0.116399 | -3.123228 | 0.001789 | 0.004022 |
| 14455 | TMEM178   | 58.25034696 | -0.363590419 | 0.307806 | -1.181234 | 0.23751  | 0.322064 |
| 10330 | RNF145    | 2809.313545 | -0.363631604 | 0.143365 | -2.536406 | 0.0112   | 0.021251 |
| 10377 | RAI14     | 1695.39323  | -0.364061602 | 0.144842 | -2.513505 | 0.011954 | 0.022579 |
| 8304  | UFC1      | 2163.318672 | -0.364165374 | 0.110594 | -3.292815 | 0.000992 | 0.002341 |
| 10672 | BOLA3     | 357.8727498 | -0.364224153 | 0.15148  | -2.404445 | 0.016197 | 0.029749 |
| 14006 | MAGIX     | 122.9321948 | -0.364338973 | 0.276774 | -1.316376 | 0.188048 | 0.263168 |
| 13378 | KCNAB2    | 489.1041046 | -0.36438203  | 0.240078 | -1.517763 | 0.129074 | 0.189103 |
| 6769  | MANBAL    | 1145.32244  | -0.364391438 | 0.093168 | -3.911105 | 9.19E-05 | 0.000266 |
| 7875  | TM9SF4    | 2560.297782 | -0.364509507 | 0.105287 | -3.462066 | 0.000536 | 0.001334 |
| 7616  | SLC35B1   | 1010.181322 | -0.364586603 | 0.101986 | -3.574858 | 0.00035  | 0.000902 |
| 13605 | SCARNA17  | 21.20027165 | -0.364641315 | 0.250648 | -1.454795 | 0.145726 | 0.20995  |
| 9693  | HSPBAP1   | 180.8460318 | -0.364695176 | 0.13269  | -2.748467 | 0.005987 | 0.012107 |
| 10104 | PTPRE     | 753.0962733 | -0.364785942 | 0.139507 | -2.614824 | 0.008927 | 0.017318 |
| 10808 | DENND3    | 960.2197104 | -0.364981199 | 0.154703 | -2.359245 | 0.018312 | 0.03321  |
| 10607 | SLC39A3   | 366.5645548 | -0.36551895  | 0.150155 | -2.434271 | 0.014922 | 0.027574 |
| 10832 | C7orf31   | 200.2995689 | -0.365673461 | 0.155646 | -2.349396 | 0.018804 | 0.034027 |
| 11961 | PLXDC2    | 737.3193102 | -0.365714763 | 0.185532 | -1.971172 | 0.048704 | 0.079814 |
| 9556  | ZNF598    | 511.5656871 | -0.366203589 | 0.130836 | -2.798949 | 0.005127 | 0.010516 |
| 7381  | HEXA      | 3408.970975 | -0.366801128 | 0.100129 | -3.663294 | 0.000249 | 0.000661 |
| 9764  | RPL17     | 5993.977631 | -0.36686852  | 0.134582 | -2.725977 | 0.006411 | 0.01287  |
| 10941 | PQLC1     | 950.1031293 | -0.367001092 | 0.159101 | -2.306724 | 0.02107  | 0.037748 |
| 10145 | CIDECP    | 88.68491858 | -0.367155945 | 0.141207 | -2.600134 | 0.009319 | 0.018005 |
| 6812  | BTF3      | 8251.110802 | -0.36732029  | 0.094322 | -3.894321 | 9.85E-05 | 0.000283 |
| 8181  | EIF3G     | 2167.538756 | -0.367363105 | 0.109909 | -3.34242  | 0.000831 | 0.00199  |
| 16476 | KCNA7     | 0.444562975 | -0.367383441 | 0.634905 | -0.578643 | 0.56283  | 0.669582 |
| 5808  | MRPL9     | 780.2993462 | -0.367444831 | 0.084064 | -4.371017 | 1.24E-05 | 4.17E-05 |
| 14697 | KCNC1     | 3.893948689 | -0.367486473 | 0.334309 | -1.099243 | 0.271662 | 0.362308 |
| 10332 | ZBTB48    | 339.6750835 | -0.367513198 | 0.144925 | -2.535883 | 0.011216 | 0.021279 |
| 13592 | EFNB3     | 45.53686798 | -0.367597157 | 0.252236 | -1.457355 | 0.145019 | 0.209117 |
| 13779 | RAB6B     | 728.8266291 | -0.367698867 | 0.263881 | -1.393429 | 0.16349  | 0.232569 |
| 10666 | NHLRC1    | 50.29913139 | -0.367888682 | 0.152928 | -2.405631 | 0.016145 | 0.029669 |
| 13223 | MAPK8IP3  | 1413.450517 | -0.368138028 | 0.234031 | -1.573034 | 0.115711 | 0.171523 |
| 11110 | ADAMTS9   | 1068.091905 | -0.368584604 | 0.163866 | -2.24931  | 0.024493 | 0.043208 |
| 8631  | RPL3      | 37621.6158  | -0.369171178 | 0.116788 | -3.161046 | 0.001572 | 0.00357  |
| 8054  | NUCB1     | 9496.936936 | -0.369195617 | 0.108865 | -3.391321 | 0.000696 | 0.001693 |
| 11065 | AFAP1     | 1063.547443 | -0.36924397  | 0.162823 | -2.267756 | 0.023344 | 0.041349 |
| 12532 | LOC282997 | 89.48571117 | -0.369370982 | 0.205762 | -1.795133 | 0.072632 | 0.113603 |
| 8960  | PSMB8     | 2990.207971 | -0.369627463 | 0.12209  | -3.027489 | 0.002466 | 0.005395 |
| 13045 | RASGRP2   | 159.0528409 | -0.369785757 | 0.226641 | -1.631589 | 0.102766 | 0.154413 |
| 13150 | HOXC8     | 154.1520309 | -0.369839625 | 0.231889 | -1.594902 | 0.110734 | 0.165057 |
| 10210 | MYBBP1A   | 650.2753757 | -0.370055028 | 0.143544 | -2.577987 | 0.009938 | 0.019078 |
| 6606  | SARS      | 2936.874908 | -0.370416115 | 0.093045 | -3.98105  | 6.86E-05 | 0.000204 |
| 17031 | MOGAT2    | 0.556799407 | -0.370503471 | 0.855255 | -0.433208 | 0.664863 | 0.765192 |
| 13607 | CCDC113   | 123.8376666 | -0.370556307 | 0.254842 | -1.454065 | 0.145928 | 0.210211 |
| 8399  | NHP2L1    | 2140.724409 | -0.370652085 | 0.1141   | -3.248479 | 0.00116  | 0.002708 |
| 9736  | SARS2     | 332.3783948 | -0.370660471 | 0.135404 | -2.73744  | 0.006192 | 0.012465 |

|       |          |             |              |          |           |          |          |
|-------|----------|-------------|--------------|----------|-----------|----------|----------|
| 14418 | ENPP6    | 14.46606954 | -0.370733824 | 0.310893 | -1.192481 | 0.233073 | 0.316858 |
| 9564  | MVP      | 7298.704286 | -0.370810628 | 0.132649 | -2.795437 | 0.005183 | 0.010622 |
| 13551 | LOXL4    | 249.0028884 | -0.371140022 | 0.252344 | -1.470769 | 0.141354 | 0.204463 |
| 8902  | CUEDC2   | 992.2104292 | -0.371460799 | 0.121747 | -3.051097 | 0.00228  | 0.00502  |
| 6903  | ZNF706   | 1023.599206 | -0.37165269  | 0.096193 | -3.863603 | 0.000112 | 0.000317 |
| 9255  | TPST1    | 414.8519646 | -0.371923712 | 0.127554 | -2.915817 | 0.003548 | 0.007513 |
| 9801  | DHX34    | 368.3817857 | -0.372032074 | 0.136954 | -2.716476 | 0.006598 | 0.013196 |
| 10499 | POLRMT   | 746.1428153 | -0.37216579  | 0.150571 | -2.471702 | 0.013447 | 0.025105 |
| 6901  | RABEPK   | 330.2424193 | -0.372297453 | 0.096338 | -3.864503 | 0.000111 | 0.000316 |
| 6866  | THOC5    | 545.2194393 | -0.372691035 | 0.096147 | -3.876261 | 0.000106 | 0.000303 |
| 10477 | TRAF3IP2 | 814.2964103 | -0.372691511 | 0.150178 | -2.481669 | 0.013077 | 0.024465 |
| 9139  | USF2     | 2388.364644 | -0.372691762 | 0.125833 | -2.961798 | 0.003058 | 0.00656  |
| 10461 | PDGFA    | 890.1668286 | -0.372708741 | 0.14975  | -2.488874 | 0.012815 | 0.024011 |
| 4685  | ZNF212   | 276.3443733 | -0.372709925 | 0.075497 | -4.936777 | 7.94E-07 | 3.32E-06 |
| 9494  | HLA-A    | 47056.03529 | -0.372735568 | 0.132138 | -2.820811 | 0.00479  | 0.00989  |
| 15857 | UTS2     | 3.693369491 | -0.372852486 | 0.493057 | -0.756205 | 0.449526 | 0.555664 |
| 10139 | TUBGCP2  | 1623.017435 | -0.37286506  | 0.14327  | -2.602526 | 0.009254 | 0.01789  |
| 10362 | TMEM2    | 3065.614898 | -0.37296335  | 0.14786  | -2.522407 | 0.011655 | 0.022048 |
| 15698 | IFIT1B   | 1.413529052 | -0.373037372 | 0.462117 | -0.807236 | 0.419531 | 0.523839 |
| 13911 | GATA3    | 116.2363803 | -0.373082523 | 0.276961 | -1.347058 | 0.177961 | 0.250753 |
| 10896 | ANO7     | 41.65863312 | -0.373357175 | 0.160789 | -2.322027 | 0.020231 | 0.036395 |
| 14361 | RTN4RL2  | 91.04609036 | -0.373469072 | 0.308518 | -1.210525 | 0.226077 | 0.308568 |
| 5896  | GTF2E2   | 477.7001074 | -0.373893863 | 0.086489 | -4.323007 | 1.54E-05 | 5.12E-05 |
| 8431  | DGCR14   | 420.323968  | -0.37397349  | 0.115565 | -3.236052 | 0.001212 | 0.002817 |
| 12299 | NEK6     | 2271.190957 | -0.374011146 | 0.200403 | -1.866294 | 0.062    | 0.09881  |
| 7647  | CNP      | 1799.682394 | -0.374121849 | 0.105045 | -3.561538 | 0.000369 | 0.000945 |
| 8429  | TCEB1    | 711.7330393 | -0.374138919 | 0.115518 | -3.238788 | 0.0012   | 0.002791 |
| 14875 | MYOC     | 16.8880086  | -0.374433524 | 0.358664 | -1.043966 | 0.296501 | 0.390703 |
| 13654 | BEST3    | 13.77516599 | -0.374733518 | 0.260745 | -1.437167 | 0.150671 | 0.216264 |
| 9408  | CHD1L    | 698.8894558 | -0.374782491 | 0.131279 | -2.854847 | 0.004306 | 0.008971 |
| 15362 | DCX      | 11.49778713 | -0.374966722 | 0.415695 | -0.902024 | 0.367044 | 0.468326 |
| 12327 | MYADM    | 4024.12375  | -0.375205695 | 0.202114 | -1.856402 | 0.063396 | 0.100806 |
| 13034 | ME1      | 314.0897852 | -0.375253947 | 0.229714 | -1.633571 | 0.102349 | 0.153916 |
| 13805 | CSNK1A1I | 1.854901602 | -0.375302346 | 0.270829 | -1.385753 | 0.165822 | 0.23544  |
| 7791  | C12orf52 | 440.9904531 | -0.375572804 | 0.107186 | -3.503927 | 0.000458 | 0.001153 |
| 14442 | RHOV     | 26.69827971 | -0.375787009 | 0.317381 | -1.184024 | 0.236404 | 0.320852 |
| 14847 | WDR66    | 119.66936   | -0.375873962 | 0.357052 | -1.052714 | 0.292472 | 0.386122 |
| 10670 | VWA5A    | 502.0893469 | -0.375967364 | 0.156354 | -2.404583 | 0.016191 | 0.029743 |
| 13056 | EMP1     | 2486.115298 | -0.375972332 | 0.230953 | -1.627917 | 0.103543 | 0.155449 |
| 11282 | U2AF1L4  | 149.0796476 | -0.37614068  | 0.17219  | -2.184451 | 0.028929 | 0.050261 |
| 6582  | CRTAP    | 5498.088559 | -0.376300156 | 0.094294 | -3.99073  | 6.59E-05 | 0.000196 |
| 8635  | EEFSEC   | 515.0602292 | -0.376351326 | 0.119152 | -3.158591 | 0.001585 | 0.003599 |
| 12750 | IFI44    | 632.3486548 | -0.376975439 | 0.219373 | -1.718426 | 0.085719 | 0.131779 |
| 10615 | CHST7    | 115.4371075 | -0.376981003 | 0.155083 | -2.430839 | 0.015064 | 0.027816 |
| 16266 | CRNA0016 | 0.515727328 | -0.377013986 | 0.592622 | -0.636179 | 0.524659 | 0.632239 |
| 9144  | ATP6V0E1 | 4556.93429  | -0.377054875 | 0.127362 | -2.960503 | 0.003071 | 0.006584 |
| 14463 | PPFIA4   | 465.7348976 | -0.377165067 | 0.31997  | -1.17875  | 0.238498 | 0.323224 |



|       |           |             |              |          |           |          |          |
|-------|-----------|-------------|--------------|----------|-----------|----------|----------|
| 12289 | C11orf66  | 15.78588754 | -0.377318702 | 0.201919 | -1.86866  | 0.06167  | 0.098356 |
| 16201 | MESTIT1   | 2.5028996   | -0.377407692 | 0.577212 | -0.653846 | 0.513211 | 0.62085  |
| 10849 | C20orf117 | 271.1365917 | -0.377482413 | 0.161332 | -2.339787 | 0.019295 | 0.03486  |
| 8170  | SCAMP3    | 1263.681611 | -0.378181194 | 0.113041 | -3.345533 | 0.000821 | 0.00197  |
| 12402 | SEPX1     | 1333.884055 | -0.378467566 | 0.206137 | -1.835999 | 0.066358 | 0.104876 |
| 10598 | ZEB2      | 1912.0002   | -0.378516748 | 0.155348 | -2.436579 | 0.014827 | 0.027422 |
| 10081 | WDR91     | 1613.155264 | -0.378580403 | 0.14421  | -2.625202 | 0.00866  | 0.016838 |
| 7522  | ALKBH3    | 319.1511914 | -0.378730185 | 0.104992 | -3.60723  | 0.000309 | 0.000806 |
| 14458 | VANGL2    | 212.0152654 | -0.378776596 | 0.321084 | -1.179681 | 0.238127 | 0.322834 |
| 7296  | ZNF18     | 197.2229886 | -0.378893451 | 0.102379 | -3.700874 | 0.000215 | 0.000577 |
| 9838  | TEAD2     | 479.48261   | -0.379064017 | 0.140017 | -2.707267 | 0.006784 | 0.013516 |
| 9277  | APBA3     | 291.478064  | -0.379153265 | 0.130435 | -2.90684  | 0.003651 | 0.007714 |
| 11548 | PKN3      | 220.4953414 | -0.379244082 | 0.180725 | -2.098457 | 0.035865 | 0.060875 |
| 11520 | DMPK      | 469.447543  | -0.379250745 | 0.179698 | -2.110485 | 0.034817 | 0.05924  |
| 8022  | GGCX      | 855.3321765 | -0.379283063 | 0.111476 | -3.402377 | 0.000668 | 0.001632 |
| 14291 | CCL28     | 203.5308365 | -0.379397896 | 0.307983 | -1.23188  | 0.217994 | 0.298971 |
| 7502  | RNASEH2E  | 353.7955039 | -0.379409255 | 0.104901 | -3.616826 | 0.000298 | 0.000779 |
| 13367 | MORN3     | 11.94581472 | -0.379764099 | 0.249608 | -1.521444 | 0.128149 | 0.187913 |
| 13827 | C1orf106  | 639.5918864 | -0.37994539  | 0.276121 | -1.376012 | 0.168818 | 0.239315 |
| 13815 | LOC648740 | 16.82520322 | -0.3799482   | 0.275069 | -1.381285 | 0.167191 | 0.237214 |
| 6409  | HARS      | 1524.980074 | -0.380055511 | 0.093343 | -4.071581 | 4.67E-05 | 0.000143 |
| 7764  | DNM2      | 4288.693079 | -0.380276619 | 0.108267 | -3.512402 | 0.000444 | 0.001121 |
| 12338 | FILIP1L   | 1273.452886 | -0.380311297 | 0.20527  | -1.852737 | 0.06392  | 0.101548 |
| 16414 | SEMA3E    | 8.597474994 | -0.380320988 | 0.635031 | -0.598901 | 0.549239 | 0.655801 |
| 7012  | SRRD      | 298.900359  | -0.380481076 | 0.099651 | -3.818147 | 0.000134 | 0.000376 |
| 7681  | SIGMAR1   | 905.6728238 | -0.380543885 | 0.107285 | -3.547022 | 0.00039  | 0.000994 |
| 11364 | HMGN3     | 2356.358563 | -0.380654158 | 0.176008 | -2.162705 | 0.030564 | 0.052718 |
| 12066 | NUDT22    | 570.3445012 | -0.380809804 | 0.196316 | -1.939779 | 0.052407 | 0.085134 |
| 10402 | DHX58     | 379.7289797 | -0.380936032 | 0.151898 | -2.507845 | 0.012147 | 0.022888 |
| 9640  | PTTG1IP   | 13635.42719 | -0.381068101 | 0.137754 | -2.766287 | 0.00567  | 0.011529 |
| 12528 | BTG3      | 433.870899  | -0.381321848 | 0.212327 | -1.795919 | 0.072507 | 0.113443 |
| 14001 | BMP8B     | 86.26542187 | -0.381465758 | 0.289443 | -1.317928 | 0.187528 | 0.262533 |
| 12055 | C12orf48  | 70.43229951 | -0.381906569 | 0.196595 | -1.942601 | 0.052064 | 0.084655 |
| 7584  | RUSC1     | 694.0119639 | -0.38191482  | 0.106532 | -3.584965 | 0.000337 | 0.000871 |
| 14028 | KIR2DL3   | 3.9398914   | -0.381934747 | 0.291204 | -1.311569 | 0.189666 | 0.265015 |
| 10915 | SLC25A6   | 13409.52634 | -0.381987988 | 0.165042 | -2.314483 | 0.020641 | 0.037067 |
| 7062  | AP4B1     | 286.1545227 | -0.382127346 | 0.100637 | -3.797101 | 0.000146 | 0.000406 |
| 10176 | FAM113A   | 906.0516782 | -0.382450172 | 0.147625 | -2.590679 | 0.009579 | 0.01845  |
| 12619 | PCDHB18   | 13.65041079 | -0.382484999 | 0.216507 | -1.766617 | 0.077292 | 0.120058 |
| 7162  | SMYD5     | 818.3302404 | -0.382592546 | 0.101753 | -3.759996 | 0.00017  | 0.000465 |
| 7050  | GMEM179E  | 942.0450351 | -0.38270719  | 0.1007   | -3.800487 | 0.000144 | 0.000402 |
| 11884 | NDRG1     | 49502.9219  | -0.382735184 | 0.191965 | -1.993776 | 0.046177 | 0.076162 |
| 10605 | NDUFS6    | 873.5551114 | -0.382755557 | 0.157197 | -2.434882 | 0.014897 | 0.027533 |
| 8937  | C14orf153 | 519.8460706 | -0.382801275 | 0.125959 | -3.039096 | 0.002373 | 0.005204 |
| 12304 | ABCG4     | 8.140950357 | -0.382925339 | 0.205442 | -1.863906 | 0.062335 | 0.099303 |
| 9051  | RPL34     | 7657.481328 | -0.382987778 | 0.127836 | -2.995939 | 0.002736 | 0.005925 |
| 11797 | NEURL1B   | 1283.594912 | -0.383299077 | 0.189529 | -2.022375 | 0.043138 | 0.071674 |

|       |           |             |              |          |           |          |          |
|-------|-----------|-------------|--------------|----------|-----------|----------|----------|
| 10960 | SFRS16    | 424.1309533 | -0.383299157 | 0.166624 | -2.300385 | 0.021426 | 0.038322 |
| 14144 | UPK3BL    | 166.7949209 | -0.38347604  | 0.301113 | -1.273529 | 0.20283  | 0.281086 |
| 10168 | ZNF513    | 353.967008  | -0.383619169 | 0.147918 | -2.593466 | 0.009501 | 0.018316 |
| 11300 | KCTD15    | 566.9693933 | -0.383706171 | 0.176156 | -2.178221 | 0.02939  | 0.050979 |
| 13000 | CADM1     | 1097.500125 | -0.383708201 | 0.233312 | -1.644614 | 0.100049 | 0.150851 |
| 14939 | OCA2      | 15.83871161 | -0.383852691 | 0.374757 | -1.024271 | 0.305707 | 0.401055 |
| 12242 | TM4SF1    | 3199.751404 | -0.384083133 | 0.203795 | -1.884652 | 0.059477 | 0.09523  |
| 7869  | CBLB      | 517.0734671 | -0.384100187 | 0.110874 | -3.464286 | 0.000532 | 0.001324 |
| 7850  | KIAA1539  | 557.4669459 | -0.384116813 | 0.110646 | -3.471589 | 0.000517 | 0.001292 |
| 11439 | TSNARE1   | 285.8088066 | -0.384203228 | 0.179717 | -2.137826 | 0.032531 | 0.055742 |
| 12999 | BTBD19    | 54.30491043 | -0.38427682  | 0.233608 | -1.644961 | 0.099978 | 0.150755 |
| 11819 | OR2A1     | 8.436510281 | -0.384449356 | 0.190787 | -2.015071 | 0.043897 | 0.072801 |
| 9712  | CTSC      | 4925.494379 | -0.384503577 | 0.14011  | -2.744297 | 0.006064 | 0.012239 |
| 16035 | SLITRK6   | 21.60481169 | -0.384664449 | 0.548062 | -0.701863 | 0.482765 | 0.590126 |
| 10860 | IFFO2     | 684.5628716 | -0.384761161 | 0.164697 | -2.336174 | 0.019482 | 0.035163 |
| 15092 | SCARNA10  | 5.08532305  | -0.384796747 | 0.393431 | -0.978055 | 0.328047 | 0.426057 |
| 9436  | PHKG2     | 466.1010049 | -0.38482093  | 0.135323 | -2.843717 | 0.004459 | 0.009263 |
| 15419 | PHACTR3   | 26.6685137  | -0.384851012 | 0.435311 | -0.884083 | 0.376652 | 0.478777 |
| 6943  | MYL6      | 14864.5553  | -0.384864671 | 0.100027 | -3.847596 | 0.000119 | 0.000337 |
| 12186 | DC1002165 | 129.4726739 | -0.385504628 | 0.202789 | -1.901012 | 0.057301 | 0.092167 |
| 16739 | NR5A1     | 0.675124683 | -0.385589715 | 0.757173 | -0.509249 | 0.610577 | 0.714911 |
| 5197  | SARNP     | 847.7976644 | -0.385840754 | 0.082465 | -4.678856 | 2.88E-06 | 1.09E-05 |
| 15535 | ASPDH     | 45.92242954 | -0.385907347 | 0.454101 | -0.849826 | 0.395422 | 0.498913 |
| 13090 | FGD3      | 238.489209  | -0.385952063 | 0.239102 | -1.614174 | 0.10649  | 0.159458 |
| 9016  | MSRB2     | 714.661827  | -0.386041104 | 0.128394 | -3.006686 | 0.002641 | 0.005742 |
| 13963 | PRTG      | 51.52860726 | -0.386369866 | 0.290331 | -1.33079  | 0.183258 | 0.257258 |
| 16293 | RXFP4     | 0.428616284 | -0.386387544 | 0.614309 | -0.628979 | 0.529363 | 0.636854 |
| 11894 | NYNRIN    | 469.5244058 | -0.386466103 | 0.19418  | -1.990242 | 0.046564 | 0.076737 |
| 11123 | LSR       | 1262.703831 | -0.386479605 | 0.172183 | -2.244585 | 0.024795 | 0.04369  |
| 7792  | ALPK1     | 516.6292849 | -0.38652871  | 0.110341 | -3.503053 | 0.00046  | 0.001157 |
| 12662 | H2AFY2    | 242.1573704 | -0.386796972 | 0.220623 | -1.753203 | 0.079567 | 0.123171 |
| 13269 | GABBR1    | 392.3700848 | -0.387020931 | 0.248722 | -1.556037 | 0.119699 | 0.17682  |
| 8183  | PRMT7     | 458.6155474 | -0.387700327 | 0.116038 | -3.341158 | 0.000834 | 0.001998 |
| 15797 | SCARNA9I  | 0.563242318 | -0.387717959 | 0.499545 | -0.776143 | 0.437665 | 0.543057 |
| 10493 | PPCDC     | 184.663518  | -0.387943844 | 0.156833 | -2.47361  | 0.013376 | 0.024986 |
| 13188 | ZC3H12D   | 23.72983167 | -0.388002623 | 0.245016 | -1.583579 | 0.113289 | 0.168389 |
| 13840 | DDR2      | 195.3969181 | -0.388040591 | 0.28301  | -1.371121 | 0.170337 | 0.241241 |
| 5020  | PANK2     | 428.8415492 | -0.388054774 | 0.081473 | -4.762964 | 1.91E-06 | 7.45E-06 |
| 16103 | XKR4      | 1.496043351 | -0.388275921 | 0.570631 | -0.680433 | 0.496231 | 0.604025 |
| 10591 | ANKH      | 1389.198167 | -0.388393185 | 0.159248 | -2.438922 | 0.014731 | 0.027262 |
| 12255 | C5orf25   | 213.0923045 | -0.388612182 | 0.206582 | -1.881157 | 0.059951 | 0.095887 |
| 8334  | ATG9A     | 1465.662831 | -0.388691077 | 0.118545 | -3.278859 | 0.001042 | 0.002451 |
| 14809 | SNORA53   | 2.791361781 | -0.388918087 | 0.36593  | -1.062822 | 0.287863 | 0.381012 |
| 14541 | FAM154A   | 1.094731906 | -0.389055314 | 0.337395 | -1.153116 | 0.248863 | 0.335463 |
| 9518  | MRPL52    | 504.4890168 | -0.389109925 | 0.138299 | -2.813543 | 0.0049   | 0.010091 |
| 9917  | KCNMB3    | 55.69128449 | -0.389143851 | 0.145138 | -2.681193 | 0.007336 | 0.0145   |
| 11278 | TUBA4A    | 1642.77246  | -0.389167919 | 0.177931 | -2.187187 | 0.028729 | 0.04993  |

|       |           |             |              |          |           |          |          |
|-------|-----------|-------------|--------------|----------|-----------|----------|----------|
| 6556  | AAAS      | 721.780024  | -0.389406664 | 0.097264 | -4.003605 | 6.24E-05 | 0.000187 |
| 9665  | MAST3     | 641.3631525 | -0.38959474  | 0.141205 | -2.759078 | 0.005796 | 0.011755 |
| 9441  | RPL7A     | 14748.64377 | -0.389663628 | 0.137151 | -2.841123 | 0.004496 | 0.009333 |
| 16521 | RFPL3     | 0.380971415 | -0.389723178 | 0.688613 | -0.565954 | 0.571425 | 0.677955 |
| 10175 | ABTB1     | 553.5044902 | -0.38984456  | 0.150476 | -2.590734 | 0.009577 | 0.018449 |
| 12369 | BNC2      | 621.284272  | -0.389991838 | 0.211429 | -1.844556 | 0.065102 | 0.103167 |
| 6607  | PSMD2     | 3535.305573 | -0.390006909 | 0.097969 | -3.980909 | 6.87E-05 | 0.000204 |
| 13085 | FAM13AOS  | 125.4626028 | -0.390072771 | 0.2412   | -1.617219 | 0.105831 | 0.158532 |
| 15693 | TRPC5     | 0.730829251 | -0.390120892 | 0.481991 | -0.809394 | 0.418288 | 0.522454 |
| 9223  | CCDC99    | 210.0098183 | -0.390169095 | 0.133176 | -2.929728 | 0.003393 | 0.00721  |
| 4759  | ADPGK     | 1236.039176 | -0.390225116 | 0.079553 | -4.905212 | 9.33E-07 | 3.84E-06 |
| 6420  | MKNK1     | 514.2909887 | -0.390390262 | 0.095997 | -4.066713 | 4.77E-05 | 0.000146 |
| 12188 | FNFRSF10C | 118.4925503 | -0.390570741 | 0.205555 | -1.900081 | 0.057422 | 0.092348 |
| 5741  | NECAP2    | 1554.286096 | -0.39060123  | 0.088749 | -4.401202 | 1.08E-05 | 3.68E-05 |
| 10673 | SHROOM1   | 291.9267653 | -0.390619674 | 0.162476 | -2.404168 | 0.016209 | 0.029769 |
| 10234 | ARL16     | 491.7544717 | -0.390621816 | 0.151933 | -2.571008 | 0.01014  | 0.019422 |
| 8983  | C22orf40  | 192.4256459 | -0.390760657 | 0.129391 | -3.019997 | 0.002528 | 0.005515 |
| 8752  | MCOLN1    | 507.1790912 | -0.39096621  | 0.125896 | -3.105471 | 0.0019   | 0.004255 |
| 13504 | SLC7A11   | 98.96827785 | -0.391211597 | 0.263015 | -1.487413 | 0.136906 | 0.198718 |
| 7169  | LOC550643 | 454.1142484 | -0.391213539 | 0.104154 | -3.756094 | 0.000173 | 0.000472 |
| 9600  | PSMG4     | 171.000814  | -0.391477842 | 0.140834 | -2.779719 | 0.005441 | 0.011108 |
| 11846 | HYAL3     | 44.75989833 | -0.391495712 | 0.195018 | -2.007483 | 0.044698 | 0.07396  |
| 13397 | MEM176A   | 9135.513182 | -0.391526142 | 0.258866 | -1.512465 | 0.130416 | 0.19081  |
| 13450 | C19orf73  | 8.216071385 | -0.391593276 | 0.260743 | -1.501839 | 0.133139 | 0.194026 |
| 9328  | TMEM140   | 2648.668119 | -0.391796647 | 0.135611 | -2.889118 | 0.003863 | 0.008118 |
| 12125 | LOC146880 | 302.1976195 | -0.391798313 | 0.204128 | -1.919379 | 0.054936 | 0.088809 |
| 8643  | MUM1      | 705.3799094 | -0.391828708 | 0.124249 | -3.153567 | 0.001613 | 0.003658 |
| 7377  | DNAJC2    | 594.5352978 | -0.391905916 | 0.10688  | -3.666796 | 0.000246 | 0.000653 |
| 8642  | PIH1D1    | 893.2407683 | -0.391924551 | 0.124264 | -3.153968 | 0.001611 | 0.003653 |
| 10747 | C17orf56  | 302.4345519 | -0.392081041 | 0.164598 | -2.382053 | 0.017216 | 0.0314   |
| 6709  | CYBASC3   | 1027.061171 | -0.392291838 | 0.099626 | -3.937657 | 8.23E-05 | 0.00024  |
| 6211  | RPN1      | 7665.397618 | -0.392476604 | 0.094059 | -4.172654 | 3.01E-05 | 9.50E-05 |
| 8549  | TYSND1    | 466.2503108 | -0.393442435 | 0.123342 | -3.189844 | 0.001423 | 0.003264 |
| 13554 | NPL       | 742.1178661 | -0.393455773 | 0.267819 | -1.469111 | 0.141803 | 0.205067 |
| 14784 | LMTK3     | 39.403932   | -0.393597281 | 0.366826 | -1.072982 | 0.283279 | 0.375579 |
| 14965 | HIST1H4C  | 0.809709711 | -0.393996347 | 0.387084 | -1.017858 | 0.308746 | 0.404392 |
| 17121 | UTS2R     | 0.39245123  | -0.394013208 | 0.971803 | -0.405445 | 0.68515  | 0.784395 |
| 11880 | SIDT1     | 66.6632703  | -0.394027402 | 0.197371 | -1.996382 | 0.045892 | 0.075719 |
| 11222 | TMEM22    | 247.7563987 | -0.394056324 | 0.178045 | -2.213235 | 0.026881 | 0.046953 |
| 13968 | NEK10     | 10.656065   | -0.394104918 | 0.296638 | -1.328573 | 0.183989 | 0.258188 |
| 12251 | CTAGE4    | 64.80310587 | -0.39413135  | 0.209437 | -1.881862 | 0.059855 | 0.095765 |
| 12138 | ZNF771    | 64.83462062 | -0.394142764 | 0.2057   | -1.916106 | 0.055352 | 0.089385 |
| 11554 | NOS3      | 487.0321339 | -0.394221575 | 0.188048 | -2.096393 | 0.036047 | 0.061153 |
| 11639 | P4HA1     | 3856.000916 | -0.39423739  | 0.190929 | -2.064833 | 0.038939 | 0.065576 |
| 14182 | MSX2P1    | 1.480785616 | -0.394242869 | 0.312258 | -1.262555 | 0.206749 | 0.285749 |
| 5582  | TRAFD1    | 886.7254252 | -0.394413304 | 0.08801  | -4.481481 | 7.41E-06 | 2.60E-05 |
| 11491 | PCBP4     | 325.6247229 | -0.394416643 | 0.185767 | -2.123179 | 0.033739 | 0.057551 |

|       |           |             |              |          |           |          |          |
|-------|-----------|-------------|--------------|----------|-----------|----------|----------|
| 11829 | SAP30     | 400.2184631 | -0.394448094 | 0.196039 | -2.012086 | 0.044211 | 0.073259 |
| 10004 | MID1IP1   | 640.4811315 | -0.394737007 | 0.148866 | -2.651624 | 0.008011 | 0.015695 |
| 14579 | HIST1H2AI | 45.48586469 | -0.394751267 | 0.345499 | -1.142553 | 0.253224 | 0.340452 |
| 7867  | C15orf63  | 741.6939223 | -0.395185222 | 0.114066 | -3.464531 | 0.000531 | 0.001323 |
| 9188  | UBE2L6    | 2580.365564 | -0.395369705 | 0.134319 | -2.943517 | 0.003245 | 0.006923 |
| 11412 | FNFAIP8L1 | 317.299929  | -0.395468611 | 0.184405 | -2.144568 | 0.031987 | 0.054941 |
| 9878  | FAM127A   | 2040.56597  | -0.395578898 | 0.146782 | -2.695006 | 0.007039 | 0.013967 |
| 14002 | DLX1      | 15.32415246 | -0.395675814 | 0.300273 | -1.317719 | 0.187598 | 0.262594 |
| 8842  | VKORC1L1  | 994.4540696 | -0.395684428 | 0.128712 | -3.074182 | 0.002111 | 0.004679 |
| 10719 | MRPS6     | 1020.23415  | -0.395866666 | 0.16564  | -2.389928 | 0.016852 | 0.030815 |
| 10623 | GALNT7    | 528.1271952 | -0.396064477 | 0.16325  | -2.426122 | 0.015261 | 0.028159 |
| 9245  | ARPC5L    | 607.283942  | -0.396237091 | 0.135689 | -2.920191 | 0.003498 | 0.007417 |
| 9882  | HOXB7     | 399.6093121 | -0.396275304 | 0.147107 | -2.693785 | 0.007065 | 0.014013 |
| 10199 | CDK5R1    | 89.66561212 | -0.396275423 | 0.153462 | -2.582231 | 0.009816 | 0.018866 |
| 10279 | NPC2      | 5486.134818 | -0.396429446 | 0.155307 | -2.552546 | 0.010694 | 0.020392 |
| 13943 | EME2      | 24.06942319 | -0.396448375 | 0.296678 | -1.336294 | 0.181453 | 0.255086 |
| 6182  | GANAB     | 10705.01178 | -0.396783629 | 0.094838 | -4.183808 | 2.87E-05 | 9.09E-05 |
| 16350 | CELF3     | 0.312289876 | -0.39690682  | 0.646517 | -0.613916 | 0.539271 | 0.646498 |
| 16821 | IL17F     | 0.334808289 | -0.396906868 | 0.817835 | -0.485314 | 0.627453 | 0.731161 |
| 16573 | DDX4      | 0.276698025 | -0.396906875 | 0.716463 | -0.553981 | 0.579592 | 0.685508 |
| 16869 | P2RX2     | 0.316956304 | -0.396906896 | 0.837948 | -0.473665 | 0.635739 | 0.738699 |
| 16870 | CRNA0002  | 0.21071838  | -0.396906998 | 0.838798 | -0.473185 | 0.636081 | 0.739053 |
| 17091 | FAM55A    | 0.250677249 | -0.396907032 | 0.955395 | -0.415438 | 0.677821 | 0.777231 |
| 17077 | BEND2     | 0.212157178 | -0.396907077 | 0.946446 | -0.419366 | 0.674949 | 0.774707 |
| 17319 | NPY       | 0.278160363 | -0.396907099 | 1.095401 | -0.36234  | 0.717098 | 0.811606 |
| 17160 | FNDC7     | 0.215614337 | -0.396907122 | 1.002224 | -0.396026 | 0.692085 | 0.790534 |
| 17508 | TH        | 0.316035537 | -0.396907137 | 1.264987 | -0.313764 | 0.7537   | 0.843802 |
| 17142 | PDE6H     | 0.176582397 | -0.396907169 | 0.990554 | -0.400692 | 0.688647 | 0.787433 |
| 17260 | OR1G1     | 0.153794074 | -0.396907267 | 1.058004 | -0.375147 | 0.707551 | 0.803475 |
| 17462 | HTR3E     | 0.212710611 | -0.396907329 | 1.226874 | -0.323511 | 0.746308 | 0.837727 |
| 17451 | C3orf22   | 0.172433286 | -0.396907403 | 1.21598  | -0.32641  | 0.744114 | 0.835769 |
| 17454 | ASB18     | 0.172903546 | -0.396907409 | 1.221083 | -0.325045 | 0.745147 | 0.836759 |
| 17554 | MAGEA2    | 0.19717977  | -0.39690747  | 1.314098 | -0.302038 | 0.762623 | 0.851554 |
| 17453 | OR2A14    | 0.136807716 | -0.396907494 | 1.220125 | -0.325301 | 0.744954 | 0.836637 |
| 17552 | TBX20     | 0.159030276 | -0.396907567 | 1.31222  | -0.30247  | 0.762293 | 0.851439 |
| 17548 | CGB2      | 0.154626814 | -0.396907568 | 1.312849 | -0.302325 | 0.762404 | 0.851439 |
| 17667 | HIST3H3   | 0.132298642 | -0.396907802 | 1.439657 | -0.275696 | 0.782782 | 0.868423 |
| 17764 | OR9A4     | 0.132805973 | -0.396908001 | 1.564973 | -0.25362  | 0.799789 | 0.882497 |
| 17782 | CHRM2     | 0.096402637 | -0.396908199 | 1.595887 | -0.248707 | 0.803588 | 0.88579  |
| 17884 | BRDT      | 0.11848563  | -0.396908366 | 1.725985 | -0.229961 | 0.818122 | 0.896644 |
| 17914 | KRT83     | 0.095360259 | -0.39690852  | 1.758942 | -0.225652 | 0.821472 | 0.898848 |
| 17987 | SNORA18   | 0.119055325 | -0.396908748 | 1.9145   | -0.207317 | 0.835762 | 0.910743 |
| 17991 | C8B       | 0.116891796 | -0.396908756 | 1.917879 | -0.206952 | 0.836047 | 0.910865 |
| 18014 | TAS2R38   | 0.096397851 | -0.396908932 | 1.948879 | -0.20366  | 0.838619 | 0.912703 |
| 18166 | SNORA64   | 0.184004571 | -0.396909237 | 2.319499 | -0.171119 | 0.864131 | 0.932331 |
| 18104 | SNORA68   | 0.100437047 | -0.39690948  | 2.175662 | -0.182432 | 0.855244 | 0.925963 |
| 18132 | CLCA4     | 0.079582113 | -0.396909764 | 2.230315 | -0.177961 | 0.858753 | 0.928276 |

|       |          |             |              |          |           |          |          |
|-------|----------|-------------|--------------|----------|-----------|----------|----------|
| 18191 | KRT24    | 0.118988749 | -0.396909961 | 2.417211 | -0.164202 | 0.869572 | 0.936974 |
| 18342 | CT45A3   | 0.241659523 | -0.39691021  | 2.91407  | -0.136205 | 0.891659 | 0.952033 |
| 18206 | CST9     | 0.099100889 | -0.396910283 | 2.471037 | -0.160625 | 0.872389 | 0.939234 |
| 18233 | NBPF6    | 0.078344969 | -0.396910675 | 2.540992 | -0.156203 | 0.875873 | 0.941374 |
| 18244 | SLC32A1  | 0.074455731 | -0.396910737 | 2.560765 | -0.154997 | 0.876824 | 0.942042 |
| 18331 | HBBP1    | 0.096533419 | -0.396911463 | 2.849636 | -0.139285 | 0.889225 | 0.950832 |
| 18336 | GJA10    | 0.094311749 | -0.396911499 | 2.860547 | -0.138754 | 0.889645 | 0.951021 |
| 18345 | GOLGA8F  | 0.097275291 | -0.39691168  | 2.91407  | -0.136205 | 0.891659 | 0.952033 |
| 18352 | OR5AK2   | 0.097255838 | -0.39691168  | 2.91407  | -0.136205 | 0.891659 | 0.952033 |
| 18343 | CT45A4   | 0.080519293 | -0.396911925 | 2.91407  | -0.136205 | 0.891659 | 0.952033 |
| 16119 | M189-UBI | 4.289293432 | -0.396912839 | 0.587614 | -0.675465 | 0.49938  | 0.607256 |
| 16768 | FLJ39609 | 0.436814294 | -0.397124448 | 0.796416 | -0.49864  | 0.618033 | 0.722452 |
| 12649 | CRMP1    | 338.7108881 | -0.397216559 | 0.226038 | -1.757303 | 0.078866 | 0.122212 |
| 9543  | TRPT1    | 492.2082254 | -0.397267017 | 0.141756 | -2.802469 | 0.005071 | 0.010416 |
| 11728 | ACOT7    | 1072.337608 | -0.397339197 | 0.194451 | -2.043388 | 0.041014 | 0.068547 |
| 8143  | STK4     | 1257.565049 | -0.397351378 | 0.118402 | -3.355949 | 0.000791 | 0.001904 |
| 10397 | EEPD1    | 284.0625831 | -0.397402262 | 0.158453 | -2.508016 | 0.012141 | 0.022882 |
| 8133  | UROD     | 1738.037928 | -0.397454762 | 0.118326 | -3.358972 | 0.000782 | 0.001885 |
| 11391 | UQCR10   | 1627.988337 | -0.397693194 | 0.184599 | -2.154366 | 0.031212 | 0.053707 |
| 10707 | ARRDC1   | 501.1702609 | -0.3979053   | 0.166154 | -2.394804 | 0.016629 | 0.030443 |
| 10278 | FAM69A   | 236.3220488 | -0.398033908 | 0.155877 | -2.553516 | 0.010664 | 0.020337 |
| 8706  | AGBL5    | 994.5809739 | -0.398265575 | 0.127349 | -3.127359 | 0.001764 | 0.003971 |
| 16645 | MYADML   | 0.866455668 | -0.398754031 | 0.743771 | -0.536125 | 0.591872 | 0.696984 |
| 11207 | ATP6V1F  | 3137.893561 | -0.399057963 | 0.179791 | -2.219569 | 0.026448 | 0.046257 |
| 7211  | TRIM11   | 350.4004937 | -0.399248338 | 0.106772 | -3.739267 | 0.000185 | 0.000502 |
| 6789  | H2AFZ    | 2322.703254 | -0.399548175 | 0.102351 | -3.903724 | 9.47E-05 | 0.000273 |
| 13673 | SLC16A5  | 153.5468856 | -0.399593375 | 0.279587 | -1.429227 | 0.152939 | 0.219246 |
| 6224  | NUB1     | 1930.233685 | -0.399986873 | 0.096    | -4.166548 | 3.09E-05 | 9.74E-05 |
| 13224 | SULT1A1  | 773.3953014 | -0.400275817 | 0.25447  | -1.57298  | 0.115723 | 0.171529 |
| 10877 | DOCK5    | 388.7406388 | -0.400315867 | 0.171804 | -2.330066 | 0.019803 | 0.035686 |
| 10821 | NLRC3    | 189.2001401 | -0.400329395 | 0.170039 | -2.354341 | 0.018556 | 0.033611 |
| 7262  | HDLBP    | 10569.98906 | -0.400343609 | 0.107623 | -3.719875 | 0.000199 | 0.000538 |
| 10250 | ZNF643   | 30.08490493 | -0.400482574 | 0.156104 | -2.565489 | 0.010303 | 0.019702 |
| 11929 | LRRC37A2 | 116.4921131 | -0.400492608 | 0.202225 | -1.98043  | 0.047655 | 0.078304 |
| 9286  | TMEM87B  | 843.6925272 | -0.400755597 | 0.13793  | -2.905494 | 0.003667 | 0.00774  |
| 10930 | FLVCR2   | 430.7480836 | -0.400929618 | 0.173602 | -2.309471 | 0.020917 | 0.037512 |
| 10561 | LRRC37A  | 333.8898728 | -0.401073575 | 0.163812 | -2.448375 | 0.01435  | 0.026634 |
| 13348 | NT5M     | 93.12703691 | -0.401077575 | 0.262316 | -1.528986 | 0.126268 | 0.185406 |
| 12995 | C10orf47 | 199.4394621 | -0.401492984 | 0.243893 | -1.646183 | 0.099726 | 0.150419 |
| 12516 | APC2     | 7.744393144 | -0.401506689 | 0.223195 | -1.798903 | 0.072034 | 0.112811 |
| 9946  | CEP170   | 1080.441944 | -0.401553734 | 0.150261 | -2.67238  | 0.007532 | 0.014843 |
| 8367  | ZNF251   | 310.7927402 | -0.401629264 | 0.12302  | -3.264754 | 0.001096 | 0.002567 |
| 10045 | CHD3     | 1917.623252 | -0.401638532 | 0.152368 | -2.635969 | 0.00839  | 0.016371 |
| 12899 | CFP      | 65.59960884 | -0.401648029 | 0.240031 | -1.673321 | 0.094264 | 0.143242 |
| 12967 | STX1B    | 64.46724693 | -0.401837688 | 0.243099 | -1.652977 | 0.098336 | 0.148645 |
| 10255 | C10orf35 | 153.0922575 | -0.401863699 | 0.156747 | -2.563765 | 0.010354 | 0.019791 |
| 10112 | SPPL2B   | 973.0803514 | -0.402487309 | 0.154017 | -2.613266 | 0.008968 | 0.017384 |

|       |          |             |              |          |           |          |          |
|-------|----------|-------------|--------------|----------|-----------|----------|----------|
| 5225  | KCTD5    | 522.3903109 | -0.40264667  | 0.086276 | -4.666936 | 3.06E-06 | 1.15E-05 |
| 8553  | THYN1    | 505.4320368 | -0.402673903 | 0.126288 | -3.188542 | 0.00143  | 0.003277 |
| 13465 | NPAS3    | 43.06126399 | -0.402746512 | 0.268946 | -1.497501 | 0.134263 | 0.195447 |
| 7543  | C19orf54 | 393.6917509 | -0.402961927 | 0.111979 | -3.598533 | 0.00032  | 0.000832 |
| 5265  | PSMC2    | 1878.128807 | -0.402998024 | 0.086774 | -4.644206 | 3.41E-06 | 1.27E-05 |
| 16899 | CDC144N  | 0.595738036 | -0.403057445 | 0.865459 | -0.465715 | 0.641419 | 0.743977 |
| 10676 | FKBP7    | 269.9510183 | -0.403111109 | 0.167707 | -2.403667 | 0.016232 | 0.029798 |
| 13916 | 44077    | 35.27792152 | -0.403576902 | 0.299984 | -1.345327 | 0.17852  | 0.251449 |
| 9743  | FAM49B   | 1034.17938  | -0.403724097 | 0.147659 | -2.734172 | 0.006254 | 0.012581 |
| 11795 | ZNF497   | 45.41874522 | -0.403738932 | 0.19958  | -2.022946 | 0.043079 | 0.071588 |
| 15837 | NAX-DISC | 0.969735687 | -0.403927147 | 0.529718 | -0.762532 | 0.445742 | 0.551683 |
| 14851 | ALOX12B  | 9.914048259 | -0.404025276 | 0.384189 | -1.051631 | 0.292969 | 0.386673 |
| 12025 | PRRT3    | 44.61972053 | -0.404052194 | 0.20676  | -1.954212 | 0.050676 | 0.082596 |
| 8591  | MYPOP    | 129.7822431 | -0.404124394 | 0.127239 | -3.176111 | 0.001493 | 0.003405 |
| 15538 | PTTG2    | 0.820546114 | -0.404311567 | 0.476125 | -0.849172 | 0.395786 | 0.499279 |
| 10998 | HBEGF    | 507.2818097 | -0.404320249 | 0.176633 | -2.289041 | 0.022077 | 0.039346 |
| 11668 | FAM26E   | 168.0042209 | -0.404377784 | 0.19648  | -2.058108 | 0.03958  | 0.06649  |
| 7644  | N6AMT2   | 133.2346048 | -0.404783842 | 0.113599 | -3.56326  | 0.000366 | 0.000939 |
| 13151 | LRRC10B  | 55.40642245 | -0.404957481 | 0.254037 | -1.594088 | 0.110916 | 0.165316 |
| 4338  | ANKLE2   | 1818.88829  | -0.405007569 | 0.078834 | -5.137445 | 2.78E-07 | 1.26E-06 |
| 16662 | TERT     | 4.736015195 | -0.405100262 | 0.763236 | -0.530766 | 0.595581 | 0.700635 |
| 12282 | LCA5L    | 87.08929067 | -0.40512792  | 0.216461 | -1.8716   | 0.061262 | 0.097769 |
| 13842 | SEMA5B   | 3004.761459 | -0.405129178 | 0.295606 | -1.370506 | 0.170529 | 0.24147  |
| 6247  | FBXO46   | 254.9383955 | -0.405266888 | 0.097521 | -4.155693 | 3.24E-05 | 0.000102 |
| 6414  | NUP85    | 479.7921672 | -0.405348502 | 0.099589 | -4.070207 | 4.70E-05 | 0.000144 |
| 8838  | RNASEH2C | 746.3692702 | -0.405369494 | 0.13184  | -3.074715 | 0.002107 | 0.004673 |
| 5715  | NAA38    | 326.679355  | -0.405436494 | 0.091858 | -4.413735 | 1.02E-05 | 3.48E-05 |
| 11403 | GRAP     | 417.2547692 | -0.405615968 | 0.188774 | -2.148687 | 0.031659 | 0.05442  |
| 7816  | CHCHD2   | 4166.545858 | -0.40596113  | 0.116114 | -3.496243 | 0.000472 | 0.001183 |
| 10779 | C12orf61 | 19.06896332 | -0.405977861 | 0.171292 | -2.370086 | 0.017784 | 0.032339 |
| 5331  | NUP93    | 651.5195927 | -0.406022591 | 0.088114 | -4.607948 | 4.07E-06 | 1.50E-05 |
| 5603  | DUSP18   | 129.1155564 | -0.406037739 | 0.090832 | -4.470194 | 7.81E-06 | 2.73E-05 |
| 12085 | FSTL1    | 13085.35793 | -0.406189292 | 0.210202 | -1.932381 | 0.053313 | 0.086469 |
| 15122 | SCXB     | 1.527210697 | -0.406296689 | 0.420285 | -0.966716 | 0.333686 | 0.432521 |
| 9463  | SERGEF   | 421.5330574 | -0.406355204 | 0.143429 | -2.833148 | 0.004609 | 0.009547 |
| 9630  | CPOX     | 462.2699797 | -0.406421473 | 0.146778 | -2.768953 | 0.005624 | 0.011445 |
| 13644 | CCDC136  | 17.88813196 | -0.40643818  | 0.282221 | -1.440141 | 0.149828 | 0.215243 |
| 6977  | RCE1     | 247.1138261 | -0.406540182 | 0.10602  | -3.834544 | 0.000126 | 0.000353 |
| 11410 | CD160    | 24.40314838 | -0.406549581 | 0.189396 | -2.146559 | 0.031828 | 0.054677 |
| 9392  | GPAA1    | 2015.542433 | -0.406643086 | 0.142104 | -2.861594 | 0.004215 | 0.008796 |
| 5332  | SAP30BP  | 1158.235933 | -0.406809646 | 0.08831  | -4.606635 | 4.09E-06 | 1.50E-05 |
| 4619  | TPM3     | 6628.324239 | -0.407091196 | 0.081736 | -4.980568 | 6.34E-07 | 2.69E-06 |
| 14797 | GRHL3    | 4.298823452 | -0.407339092 | 0.381837 | -1.066787 | 0.286068 | 0.378943 |
| 11133 | CBLN3    | 147.8495131 | -0.407346041 | 0.181732 | -2.241469 | 0.024996 | 0.044    |
| 11032 | FUT8     | 554.2634297 | -0.407444597 | 0.178715 | -2.279856 | 0.022616 | 0.040183 |
| 9187  | KATNB1   | 370.8646896 | -0.407646001 | 0.138467 | -2.943991 | 0.00324  | 0.006913 |
| 9684  | TIGD5    | 160.6885846 | -0.407690019 | 0.14817  | -2.751504 | 0.005932 | 0.012007 |

|       |          |             |              |          |           |          |          |
|-------|----------|-------------|--------------|----------|-----------|----------|----------|
| 5552  | SMARCAL  | 598.4647541 | -0.407752155 | 0.090641 | -4.498531 | 6.84E-06 | 2.42E-05 |
| 9905  | PSD4     | 812.3245749 | -0.407813147 | 0.151806 | -2.686416 | 0.007222 | 0.014291 |
| 13946 | CD200R1  | 61.25266162 | -0.407938442 | 0.305457 | -1.335503 | 0.181712 | 0.255395 |
| 9396  | GPS1     | 1630.281179 | -0.408145288 | 0.1427   | -2.860168 | 0.004234 | 0.008833 |
| 5278  | PIAS3    | 681.5249924 | -0.408201631 | 0.088025 | -4.637344 | 3.53E-06 | 1.31E-05 |
| 9250  | C17orf37 | 786.2201234 | -0.408533279 | 0.140003 | -2.91803  | 0.003523 | 0.007464 |
| 14204 | ZNF883   | 65.15603464 | -0.408773824 | 0.325672 | -1.255169 | 0.209417 | 0.288988 |
| 13643 | RPP25    | 250.5239738 | -0.408887489 | 0.28385  | -1.440506 | 0.149724 | 0.215121 |
| 10363 | RHBDF1   | 495.9195116 | -0.409483577 | 0.162357 | -2.522116 | 0.011665 | 0.022064 |
| 11279 | IRF1     | 1657.355549 | -0.409577134 | 0.187367 | -2.185962 | 0.028818 | 0.050082 |
| 5668  | NADK     | 822.1913827 | -0.409642358 | 0.09233  | -4.436741 | 9.13E-06 | 3.16E-05 |
| 10974 | RABEP2   | 456.6730483 | -0.409713615 | 0.178502 | -2.295284 | 0.021717 | 0.038789 |
| 16181 | SNORD97  | 1.062009739 | -0.409955439 | 0.621745 | -0.659363 | 0.509663 | 0.617385 |
| 9064  | JMJD8    | 1808.45215  | -0.410187462 | 0.137059 | -2.992782 | 0.002764 | 0.005978 |
| 9694  | NFIX     | 1468.515128 | -0.410273066 | 0.149274 | -2.748455 | 0.005988 | 0.012107 |
| 10191 | PLEKHH3  | 405.274759  | -0.41028862  | 0.158679 | -2.58565  | 0.00972  | 0.018694 |
| 12858 | MYC      | 2329.790091 | -0.410316117 | 0.242839 | -1.689663 | 0.091092 | 0.138863 |
| 9281  | PFDN4    | 373.8566408 | -0.410398783 | 0.141208 | -2.906339 | 0.003657 | 0.007723 |
| 10614 | MLF1IP   | 180.6149333 | -0.411024218 | 0.169035 | -2.431592 | 0.015033 | 0.027761 |
| 9248  | SEMA4C   | 826.4996434 | -0.411191319 | 0.140836 | -2.919655 | 0.003504 | 0.007427 |
| 13195 | KCNA6    | 8.489865441 | -0.411283583 | 0.260303 | -1.580019 | 0.114103 | 0.169498 |
| 8427  | ZNF32    | 643.5947091 | -0.411303033 | 0.126963 | -3.239552 | 0.001197 | 0.002785 |
| 13080 | METRNL   | 638.6357392 | -0.411339665 | 0.253941 | -1.619822 | 0.105271 | 0.157753 |
| 8799  | PLA2G15  | 989.4397637 | -0.411445166 | 0.133295 | -3.08672  | 0.002024 | 0.004508 |
| 16295 | AQP7P3   | 0.814872559 | -0.412019093 | 0.655354 | -0.628697 | 0.529548 | 0.636984 |
| 13260 | KLHL30   | 16.075416   | -0.412019616 | 0.263995 | -1.56071  | 0.118592 | 0.175304 |
| 7783  | FCGRT    | 4236.240304 | -0.412463176 | 0.11764  | -3.506149 | 0.000455 | 0.001145 |
| 11031 | GPX4     | 4656.596631 | -0.412594433 | 0.180956 | -2.28008  | 0.022603 | 0.040163 |
| 7871  | HSPB11   | 343.3406843 | -0.412653607 | 0.119124 | -3.464078 | 0.000532 | 0.001325 |
| 12042 | GYPE     | 9.380063679 | -0.412831084 | 0.212082 | -1.946559 | 0.051588 | 0.08397  |
| 9152  | TSC22D4  | 1140.53567  | -0.412900625 | 0.139625 | -2.957207 | 0.003104 | 0.006649 |
| 8878  | NOSIP    | 693.5246748 | -0.413147419 | 0.134974 | -3.06094  | 0.002206 | 0.004871 |
| 3671  | ANAPC5   | 2322.072652 | -0.413242504 | 0.074397 | -5.554531 | 2.78E-08 | 1.49E-07 |
| 12783 | PLCE1    | 355.4534089 | -0.413318877 | 0.241806 | -1.709297 | 0.087396 | 0.13401  |
| 8300  | HSF1     | 1479.387082 | -0.413523294 | 0.125559 | -3.293464 | 0.00099  | 0.002337 |
| 8948  | RFX1     | 373.3918593 | -0.413699368 | 0.136368 | -3.033691 | 0.002416 | 0.005292 |
| 10462 | VILL     | 142.3240038 | -0.413763601 | 0.166264 | -2.488593 | 0.012825 | 0.024028 |
| 6169  | MRPL18   | 777.2510777 | -0.41400529  | 0.098791 | -4.19073  | 2.78E-05 | 8.83E-05 |
| 14003 | MST1P2   | 158.5945798 | -0.414022603 | 0.314191 | -1.31774  | 0.187591 | 0.262594 |
| 6909  | DNAJB12  | 1416.538444 | -0.414023946 | 0.10726  | -3.860009 | 0.000113 | 0.000322 |
| 10737 | FBXL15   | 241.7029807 | -0.414154175 | 0.173634 | -2.385216 | 0.017069 | 0.031161 |
| 14097 | ABHD12B  | 4.628560182 | -0.414206716 | 0.321288 | -1.289206 | 0.197326 | 0.27437  |
| 12537 | ZC3H12A  | 234.6237075 | -0.414239547 | 0.230887 | -1.794121 | 0.072794 | 0.113818 |
| 9341  | PGD      | 1347.653534 | -0.414403877 | 0.143779 | -2.882229 | 0.003949 | 0.008286 |
| 9278  | CCDC72   | 889.2963276 | -0.414906523 | 0.142747 | -2.906595 | 0.003654 | 0.007719 |
| 11146 | NAB2     | 725.3332734 | -0.415301031 | 0.185474 | -2.239137 | 0.025147 | 0.044223 |
| 12434 | SRGAP3   | 113.379394  | -0.415362565 | 0.227434 | -1.826297 | 0.067805 | 0.106889 |

|       |          |             |              |          |           |          |          |
|-------|----------|-------------|--------------|----------|-----------|----------|----------|
| 13275 | RGS18    | 131.0336638 | -0.415496216 | 0.267666 | -1.552295 | 0.120592 | 0.178058 |
| 13426 | L1TD1    | 7.670095995 | -0.415539296 | 0.275756 | -1.506912 | 0.131833 | 0.192467 |
| 13569 | NTN5     | 7.490594457 | -0.415732544 | 0.28389  | -1.464412 | 0.143081 | 0.206687 |
| 14912 | PSAT1    | 777.8057717 | -0.416025899 | 0.402815 | -1.032797 | 0.301699 | 0.396587 |
| 14629 | KCNK9    | 80.22054049 | -0.416030581 | 0.370455 | -1.123025 | 0.261427 | 0.350279 |
| 6941  | EIF2B4   | 655.5867662 | -0.416168055 | 0.108161 | -3.847657 | 0.000119 | 0.000337 |
| 11413 | WASH3P   | 412.5792419 | -0.416457965 | 0.194214 | -2.144328 | 0.032007 | 0.054969 |
| 10572 | JUND     | 2392.430024 | -0.416471537 | 0.170212 | -2.446787 | 0.014414 | 0.026723 |
| 10924 | GDF9     | 16.48295331 | -0.416642649 | 0.180282 | -2.311057 | 0.02083  | 0.037375 |
| 5487  | LRRC59   | 2463.360516 | -0.416644852 | 0.092002 | -4.528654 | 5.94E-06 | 2.12E-05 |
| 9910  | FAM46A   | 683.7584134 | -0.416730875 | 0.155194 | -2.68522  | 0.007248 | 0.014336 |
| 13241 | GAPT     | 120.5688932 | -0.416838293 | 0.266162 | -1.566107 | 0.117324 | 0.173677 |
| 8766  | DND1     | 66.57868372 | -0.417071998 | 0.134646 | -3.097548 | 0.001951 | 0.004363 |
| 13638 | FGFR4    | 1173.471574 | -0.417094179 | 0.289235 | -1.442059 | 0.149286 | 0.214558 |
| 8931  | WDR4     | 135.9138926 | -0.417273823 | 0.137225 | -3.040811 | 0.002359 | 0.005178 |
| 12113 | OBSCN    | 728.4771999 | -0.417307032 | 0.216904 | -1.923927 | 0.054364 | 0.08797  |
| 5416  | C11orf17 | 384.9928731 | -0.417390498 | 0.091591 | -4.557134 | 5.19E-06 | 1.88E-05 |
| 6486  | PARK7    | 3527.002935 | -0.417412132 | 0.103477 | -4.033855 | 5.49E-05 | 0.000166 |
| 14141 | DLEU7    | 5.377418832 | -0.417548552 | 0.327535 | -1.274822 | 0.202372 | 0.28051  |
| 3903  | RAB8A    | 1594.69646  | -0.417655605 | 0.077308 | -5.402519 | 6.57E-08 | 3.30E-07 |
| 9344  | PVR      | 1344.452358 | -0.417673319 | 0.145017 | -2.88016  | 0.003975 | 0.008338 |
| 14743 | KLRC4    | 5.939052328 | -0.417824104 | 0.384625 | -1.086316 | 0.277339 | 0.368726 |
| 11637 | TET1     | 46.17927604 | -0.41797182  | 0.202323 | -2.06586  | 0.038842 | 0.065424 |
| 6849  | ARFRP1   | 710.678103  | -0.418080838 | 0.107762 | -3.879663 | 0.000105 | 0.000299 |
| 9971  | WDR81    | 1389.142061 | -0.418122504 | 0.157029 | -2.662703 | 0.007752 | 0.015238 |
| 17076 | C3P1     | 0.907119372 | -0.418162257 | 0.997    | -0.41942  | 0.674909 | 0.774707 |
| 8121  | NPRL3    | 966.3500651 | -0.418210536 | 0.124372 | -3.362573 | 0.000772 | 0.001864 |
| 11588 | ARRDC3   | 6098.237137 | -0.418368733 | 0.20069  | -2.08465  | 0.037101 | 0.062756 |
| 7345  | PRPF6    | 2772.853098 | -0.418716354 | 0.113666 | -3.683728 | 0.00023  | 0.000613 |
| 15290 | CREB3L3  | 468.8675563 | -0.418823603 | 0.453584 | -0.923365 | 0.355817 | 0.45614  |
| 13338 | PLAC9    | 142.4359745 | -0.41903038  | 0.273537 | -1.531898 | 0.125548 | 0.1845   |
| 6102  | RNF135   | 846.0317074 | -0.419154102 | 0.099297 | -4.221198 | 2.43E-05 | 7.81E-05 |
| 8700  | PRICKLE3 | 143.2146694 | -0.419278363 | 0.133933 | -3.130519 | 0.001745 | 0.003931 |
| 8176  | RRP8     | 330.6494671 | -0.419816685 | 0.125568 | -3.343329 | 0.000828 | 0.001984 |
| 12417 | ANKRD36  | 179.4286794 | -0.419820223 | 0.229327 | -1.83066  | 0.067151 | 0.106002 |
| 13459 | CECR4    | 3.018662501 | -0.420581756 | 0.280529 | -1.499247 | 0.13381  | 0.194873 |
| 7491  | MRPL11   | 722.4019738 | -0.420837539 | 0.116268 | -3.619558 | 0.000295 | 0.000772 |
| 12343 | SNORA7B  | 6.207964931 | -0.420854327 | 0.227455 | -1.850273 | 0.064274 | 0.102069 |
| 11833 | PLK2     | 2051.520215 | -0.420900363 | 0.209386 | -2.010163 | 0.044414 | 0.07357  |
| 9728  | ST3GAL5  | 365.1219543 | -0.420923368 | 0.1537   | -2.738609 | 0.00617  | 0.012432 |
| 5218  | RNF220   | 1032.690758 | -0.421041126 | 0.090127 | -4.671625 | 2.99E-06 | 1.12E-05 |
| 4895  | ASCC2    | 1234.330301 | -0.421069753 | 0.087193 | -4.829177 | 1.37E-06 | 5.49E-06 |
| 8603  | HINT1    | 5859.545956 | -0.421178926 | 0.132687 | -3.174232 | 0.001502 | 0.003423 |
| 10198 | MRPL38   | 932.9855924 | -0.421308202 | 0.163153 | -2.582291 | 0.009815 | 0.018864 |
| 8583  | TUBG1    | 648.2261726 | -0.421516721 | 0.132576 | -3.17944  | 0.001476 | 0.00337  |
| 6545  | PDZD11   | 883.2376959 | -0.421538052 | 0.105201 | -4.006995 | 6.15E-05 | 0.000184 |
| 3927  | GRB2     | 3145.311905 | -0.421811115 | 0.078328 | -5.385202 | 7.24E-08 | 3.61E-07 |



|       |           |             |              |          |           |          |          |
|-------|-----------|-------------|--------------|----------|-----------|----------|----------|
| 9870  | DOPEY2    | 829.8745693 | -0.422450521 | 0.156665 | -2.696521 | 0.007007 | 0.013914 |
| 15149 | XG        | 10.79275419 | -0.422722769 | 0.440137 | -0.960434 | 0.336837 | 0.435827 |
| 9489  | JMJD4     | 459.0122428 | -0.422769107 | 0.149827 | -2.821715 | 0.004777 | 0.009867 |
| 14691 | OLFM1     | 246.8204636 | -0.422831893 | 0.383397 | -1.102856 | 0.27009  | 0.360359 |
| 4332  | RAC1      | 6996.119399 | -0.422928941 | 0.082271 | -5.140676 | 2.74E-07 | 1.24E-06 |
| 4084  | CCT5      | 3696.829992 | -0.423010616 | 0.079963 | -5.290106 | 1.22E-07 | 5.87E-07 |
| 8107  | TTC15     | 814.1607324 | -0.42324918  | 0.125657 | -3.368292 | 0.000756 | 0.001829 |
| 8265  | MRPL40    | 929.8509853 | -0.423280739 | 0.128044 | -3.305746 | 0.000947 | 0.002246 |
| 10874 | APOL3     | 983.3491157 | -0.423394832 | 0.181619 | -2.33123  | 0.019741 | 0.035585 |
| 15070 | PKHD1L1   | 5.323997728 | -0.423577823 | 0.429753 | -0.98563  | 0.324315 | 0.421824 |
| 11191 | OBFC2A    | 416.6801835 | -0.423745018 | 0.190474 | -2.224692 | 0.026102 | 0.045717 |
| 5994  | C8orf76   | 292.303747  | -0.423771033 | 0.099241 | -4.270112 | 1.95E-05 | 6.39E-05 |
| 9070  | ARHGEF6   | 1108.596948 | -0.424367124 | 0.141906 | -2.990478 | 0.002785 | 0.006019 |
| 5897  | PSMC1     | 520.3861883 | -0.424393121 | 0.098177 | -4.322727 | 1.54E-05 | 5.12E-05 |
| 12648 | ZFP36     | 7627.679453 | -0.42467557  | 0.241588 | -1.757851 | 0.078773 | 0.122077 |
| 11390 | HSPA1A    | 8532.137066 | -0.424767605 | 0.197066 | -2.155456 | 0.031126 | 0.053565 |
| 8621  | LDLRAP1   | 421.5257314 | -0.424793244 | 0.134138 | -3.166844 | 0.001541 | 0.003504 |
| 3658  | RNF130    | 2584.644212 | -0.424978457 | 0.076363 | -5.56523  | 2.62E-08 | 1.40E-07 |
| 9561  | CDK11A    | 419.4539537 | -0.425055443 | 0.15201  | -2.796234 | 0.00517  | 0.010599 |
| 8419  | NAT9      | 461.272182  | -0.425416628 | 0.131181 | -3.242962 | 0.001183 | 0.002754 |
| 9004  | DC1001309 | 47.38693729 | -0.425580243 | 0.141396 | -3.00985  | 0.002614 | 0.00569  |
| 9069  | TAP1      | 3761.690796 | -0.425658302 | 0.142306 | -2.991155 | 0.002779 | 0.006007 |
| 14180 | BDKRB2    | 716.726501  | -0.4258514   | 0.337171 | -1.263013 | 0.206584 | 0.285561 |
| 12166 | ANO1      | 1006.748374 | -0.425915684 | 0.223296 | -1.907403 | 0.056468 | 0.090978 |
| 9078  | METTL12   | 46.14566705 | -0.425921156 | 0.142588 | -2.98707  | 0.002817 | 0.006082 |
| 11420 | LIPA      | 4786.906757 | -0.425987582 | 0.198849 | -2.142272 | 0.032172 | 0.055219 |
| 5910  | PSMD8     | 2924.602024 | -0.426045746 | 0.09869  | -4.31699  | 1.58E-05 | 5.25E-05 |
| 11753 | CTSD      | 50743.43636 | -0.426165179 | 0.209278 | -2.036359 | 0.041714 | 0.069557 |
| 11598 | PALLD     | 2701.451168 | -0.426681213 | 0.205047 | -2.080894 | 0.037444 | 0.063281 |
| 7614  | ARMC7     | 354.3177691 | -0.426695023 | 0.119329 | -3.575774 | 0.000349 | 0.000899 |
| 7520  | RBPJ      | 902.0135877 | -0.42680817  | 0.118305 | -3.607706 | 0.000309 | 0.000805 |
| 9288  | SRXN1     | 1368.631088 | -0.426851335 | 0.146974 | -2.90426  | 0.003681 | 0.007769 |
| 8800  | CHCHD1    | 475.6055082 | -0.426967011 | 0.138336 | -3.086459 | 0.002026 | 0.004511 |
| 6323  | TP53      | 1011.986643 | -0.427123294 | 0.103778 | -4.115752 | 3.86E-05 | 0.00012  |
| 16241 | PHF21B    | 5.358493552 | -0.427381769 | 0.664413 | -0.643247 | 0.520064 | 0.627656 |
| 5007  | TBC1D10B  | 1212.878024 | -0.427576503 | 0.089656 | -4.769087 | 1.85E-06 | 7.24E-06 |
| 7604  | DCAF15    | 390.1689431 | -0.427667154 | 0.11951  | -3.578511 | 0.000346 | 0.000891 |
| 6780  | ZNRD1     | 346.768245  | -0.427808679 | 0.109483 | -3.90753  | 9.32E-05 | 0.00027  |
| 14104 | COL9A2    | 95.99565641 | -0.427932158 | 0.332263 | -1.287931 | 0.19777  | 0.27485  |
| 7429  | PES1      | 1629.316277 | -0.428088802 | 0.117454 | -3.644734 | 0.000268 | 0.000706 |
| 5697  | SSH1      | 1252.336629 | -0.428165663 | 0.096839 | -4.421437 | 9.80E-06 | 3.37E-05 |
| 10495 | KLHDC4    | 409.5796429 | -0.428320663 | 0.173208 | -2.472866 | 0.013403 | 0.025033 |
| 7495  | PPP1R9B   | 1764.112353 | -0.428338726 | 0.11835  | -3.619252 | 0.000295 | 0.000773 |
| 6968  | CHMP1A    | 2217.702143 | -0.428379188 | 0.111549 | -3.840278 | 0.000123 | 0.000346 |
| 9015  | LZTS2     | 1405.878887 | -0.428532457 | 0.142518 | -3.006863 | 0.00264  | 0.005739 |
| 6772  | NSMAF     | 719.1846493 | -0.428610505 | 0.109635 | -3.909441 | 9.25E-05 | 0.000268 |
| 11533 | LOC339047 | 869.9973312 | -0.428620115 | 0.203429 | -2.106975 | 0.03512  | 0.059688 |

|       |           |             |              |          |           |          |          |
|-------|-----------|-------------|--------------|----------|-----------|----------|----------|
| 12987 | PACSIN3   | 226.6508856 | -0.428634385 | 0.259971 | -1.648776 | 0.099193 | 0.149699 |
| 13239 | MEM200E   | 361.5132188 | -0.428905388 | 0.27371  | -1.567007 | 0.117113 | 0.173392 |
| 7497  | SSBP1     | 1336.156071 | -0.428922344 | 0.118542 | -3.61831  | 0.000297 | 0.000775 |
| 9746  | FAM118A   | 275.2820883 | -0.428982855 | 0.156927 | -2.733641 | 0.006264 | 0.012598 |
| 12864 | SNORA39   | 6.204087377 | -0.429111659 | 0.254121 | -1.68861  | 0.091294 | 0.139106 |
| 12134 | FITM1     | 5.722412498 | -0.429443028 | 0.224064 | -1.916608 | 0.055288 | 0.089311 |
| 9701  | ARID3A    | 80.64728822 | -0.429682868 | 0.156482 | -2.745899 | 0.006035 | 0.01219  |
| 7513  | SKP2      | 88.92300525 | -0.42976178  | 0.118978 | -3.612113 | 0.000304 | 0.000792 |
| 6836  | PTRH2     | 321.644913  | -0.429816347 | 0.110606 | -3.886005 | 0.000102 | 0.000292 |
| 5081  | MAN2B2    | 1419.109287 | -0.429839163 | 0.090845 | -4.731583 | 2.23E-06 | 8.59E-06 |
| 9675  | C16orf55  | 147.4743662 | -0.429902656 | 0.156025 | -2.755349 | 0.005863 | 0.011878 |
| 7963  | SSR3      | 4069.431071 | -0.429937635 | 0.125593 | -3.423263 | 0.000619 | 0.001523 |
| 7052  | FEN1      | 374.0883726 | -0.429972967 | 0.113147 | -3.800133 | 0.000145 | 0.000402 |
| 8640  | MRPL28    | 1119.032552 | -0.430087431 | 0.136299 | -3.155479 | 0.001602 | 0.003635 |
| 7909  | ERP29     | 3106.953096 | -0.430296709 | 0.124914 | -3.444731 | 0.000572 | 0.001417 |
| 8659  | LMO4      | 684.2355063 | -0.43061832  | 0.136815 | -3.147451 | 0.001647 | 0.003728 |
| 14694 | UPP2      | 20.9386734  | -0.430897618 | 0.391075 | -1.101829 | 0.270536 | 0.360881 |
| 4899  | SNRPA1    | 348.7220207 | -0.430900516 | 0.089272 | -4.826808 | 1.39E-06 | 5.55E-06 |
| 8116  | ATP13A2   | 884.2288362 | -0.431095662 | 0.128167 | -3.36354  | 0.000769 | 0.001858 |
| 6520  | PEA15     | 5695.087075 | -0.431223625 | 0.107319 | -4.018135 | 5.87E-05 | 0.000176 |
| 12453 | KIFC2     | 403.4300275 | -0.431642951 | 0.237235 | -1.819474 | 0.068839 | 0.108353 |
| 4733  | HDAC3     | 1064.668453 | -0.432033174 | 0.087857 | -4.917448 | 8.77E-07 | 3.63E-06 |
| 8341  | ZNF511    | 450.4202514 | -0.432246564 | 0.131903 | -3.276995 | 0.001049 | 0.002466 |
| 7776  | IL13RA1   | 3088.33897  | -0.432435937 | 0.123253 | -3.508511 | 0.000451 | 0.001136 |
| 8834  | CCDC61    | 130.7945849 | -0.432516237 | 0.140573 | -3.076807 | 0.002092 | 0.004642 |
| 7179  | ARPC5     | 4108.442329 | -0.432796075 | 0.115341 | -3.752311 | 0.000175 | 0.000478 |
| 13208 | LOC400759 | 30.76382099 | -0.432901997 | 0.274437 | -1.577417 | 0.1147   | 0.170217 |
| 13014 | SCN11A    | 9.633986726 | -0.433002788 | 0.264067 | -1.639745 | 0.101058 | 0.152208 |
| 15039 | EPHA6     | 38.31919746 | -0.433123696 | 0.435377 | -0.994823 | 0.319822 | 0.416839 |
| 15507 | LMOD2     | 0.486135355 | -0.433129008 | 0.505068 | -0.857566 | 0.391132 | 0.494395 |
| 7938  | PRR4      | 34.32432921 | -0.433169554 | 0.126189 | -3.432708 | 0.000598 | 0.001476 |
| 7700  | SRC       | 1190.431924 | -0.433266324 | 0.122383 | -3.540262 | 0.0004   | 0.001018 |
| 16408 | FGL1      | 2.812881996 | -0.433332454 | 0.722573 | -0.599708 | 0.548701 | 0.655478 |
| 15258 | ABP1      | 7397.890938 | -0.433389817 | 0.465337 | -0.931345 | 0.351675 | 0.451775 |
| 12470 | CORIN     | 27.98542123 | -0.43339706  | 0.239232 | -1.811618 | 0.070045 | 0.110101 |
| 13248 | HRFAM7A   | 34.27299657 | -0.433550552 | 0.277394 | -1.56294  | 0.118067 | 0.174672 |
| 5912  | PSMC4     | 1657.43388  | -0.433703846 | 0.100478 | -4.316394 | 1.59E-05 | 5.26E-05 |
| 2590  | LASS5     | 939.295005  | -0.433740924 | 0.06785  | -6.392662 | 1.63E-10 | 1.23E-09 |
| 10194 | LOC728554 | 190.4855563 | -0.433938516 | 0.16786  | -2.585123 | 0.009734 | 0.018717 |
| 11535 | CYGB      | 852.9240612 | -0.434070423 | 0.206183 | -2.105267 | 0.035268 | 0.05993  |
| 5274  | LASP1     | 6008.690361 | -0.434384354 | 0.093634 | -4.639156 | 3.50E-06 | 1.30E-05 |
| 11934 | CKS2      | 343.8383229 | -0.434481555 | 0.219549 | -1.978971 | 0.047819 | 0.078541 |
| 10768 | PTPLAD2   | 312.5653278 | -0.434500624 | 0.182871 | -2.375992 | 0.017502 | 0.031859 |
| 11067 | PLEKHG5   | 301.4395479 | -0.434575621 | 0.191635 | -2.267725 | 0.023346 | 0.041349 |
| 13914 | XKR9      | 33.75480402 | -0.434624673 | 0.322832 | -1.346286 | 0.17821  | 0.251049 |
| 8114  | MED25     | 728.3286498 | -0.434630124 | 0.129214 | -3.363636 | 0.000769 | 0.001858 |
| 12492 | DNAH1     | 247.3319944 | -0.434716202 | 0.240675 | -1.806241 | 0.070881 | 0.111213 |

|       |          |             |              |          |           |          |          |
|-------|----------|-------------|--------------|----------|-----------|----------|----------|
| 9457  | EPB41L2  | 1779.830544 | -0.434851828 | 0.153366 | -2.835379 | 0.004577 | 0.009487 |
| 10863 | NFKBIE   | 869.189529  | -0.434998854 | 0.186273 | -2.335282 | 0.019529 | 0.035237 |
| 7727  | CSNK1E   | 1963.724581 | -0.43523544  | 0.123315 | -3.529457 | 0.000416 | 0.001056 |
| 14929 | C9orf50  | 10.81639232 | -0.43559468  | 0.424619 | -1.025848 | 0.304963 | 0.400401 |
| 8295  | LMF2     | 1929.965747 | -0.436124954 | 0.132348 | -3.295291 | 0.000983 | 0.002323 |
| 13573 | RNF126P1 | 1.686070111 | -0.436138564 | 0.298106 | -1.46303  | 0.143459 | 0.207172 |
| 12284 | C2orf52  | 6.025173924 | -0.436260597 | 0.233241 | -1.870427 | 0.061425 | 0.098012 |
| 8782  | ZBTB17   | 433.5348759 | -0.436273403 | 0.141092 | -3.092112 | 0.001987 | 0.004436 |
| 7156  | CSNK2B   | 2637.302297 | -0.436486755 | 0.116018 | -3.762234 | 0.000168 | 0.000461 |
| 4152  | ZNF438   | 233.9999076 | -0.436849543 | 0.0832   | -5.250578 | 1.52E-07 | 7.16E-07 |
| 8066  | CENPL    | 106.7395302 | -0.436865538 | 0.129017 | -3.38612  | 0.000709 | 0.001723 |
| 8031  | HDAC7    | 1771.661852 | -0.436949623 | 0.128553 | -3.398988 | 0.000676 | 0.001651 |
| 9851  | MUTYH    | 132.5959694 | -0.436957439 | 0.161607 | -2.703833 | 0.006854 | 0.013639 |
| 9762  | DVL1     | 909.392856  | -0.437086461 | 0.160281 | -2.727007 | 0.006391 | 0.012833 |
| 9690  | C21orf82 | 6.688001927 | -0.437236662 | 0.159052 | -2.749018 | 0.005977 | 0.012091 |
| 13559 | DGCR10   | 29.75406043 | -0.4376257   | 0.2982   | -1.467557 | 0.142225 | 0.205601 |
| 5622  | RAVER1   | 1250.389611 | -0.437839271 | 0.098141 | -4.461317 | 8.15E-06 | 2.84E-05 |
| 11571 | AMIGO2   | 306.9481996 | -0.43803311  | 0.20937  | -2.092146 | 0.036425 | 0.061704 |
| 7059  | ZC3HC1   | 752.1832987 | -0.438338302 | 0.115423 | -3.797684 | 0.000146 | 0.000406 |
| 7717  | MAPK7    | 441.7988082 | -0.438755487 | 0.124159 | -3.533824 | 0.00041  | 0.00104  |
| 12841 | IL12A    | 4.910264005 | -0.43891181  | 0.259276 | -1.692837 | 0.090486 | 0.138122 |
| 6317  | FLOT1    | 4361.700161 | -0.439010095 | 0.106611 | -4.117867 | 3.82E-05 | 0.000119 |
| 12478 | PCSK4    | 76.33781906 | -0.43906181  | 0.242719 | -1.80893  | 0.070462 | 0.110685 |
| 8400  | PPIAL4G  | 26.8669643  | -0.439212019 | 0.135219 | -3.248158 | 0.001162 | 0.00271  |
| 9662  | CNRIP1   | 293.6751467 | -0.439250092 | 0.159126 | -2.760384 | 0.005773 | 0.011712 |
| 4414  | NUDCD3   | 2457.788017 | -0.439470006 | 0.086284 | -5.093269 | 3.52E-07 | 1.56E-06 |
| 7581  | C16orf42 | 870.4337501 | -0.439822237 | 0.122672 | -3.585343 | 0.000337 | 0.00087  |
| 8261  | C21orf57 | 199.8544106 | -0.439979961 | 0.133014 | -3.307763 | 0.00094  | 0.002231 |
| 13251 | HOXC13   | 5.066410237 | -0.440008394 | 0.281556 | -1.562772 | 0.118106 | 0.174704 |
| 7702  | RPL5     | 19241.27835 | -0.440045787 | 0.124318 | -3.539677 | 0.000401 | 0.00102  |
| 6729  | AMZ2P1   | 178.2870665 | -0.44037657  | 0.112045 | -3.930358 | 8.48E-05 | 0.000247 |
| 6840  | EXOC4    | 1714.375303 | -0.440432434 | 0.113391 | -3.884206 | 0.000103 | 0.000294 |
| 9074  | SSBP2    | 345.3335295 | -0.440802166 | 0.147544 | -2.987599 | 0.002812 | 0.006074 |
| 6533  | KDM4B    | 1258.85407  | -0.441009648 | 0.10995  | -4.011017 | 6.05E-05 | 0.000181 |
| 13194 | GRAPL    | 7.874280006 | -0.441019132 | 0.278928 | -1.58112  | 0.113851 | 0.169136 |
| 9474  | SHMT2    | 4174.951154 | -0.441122617 | 0.155943 | -2.828747 | 0.004673 | 0.009668 |
| 7744  | MAP1S    | 752.9818545 | -0.441268181 | 0.125289 | -3.522005 | 0.000428 | 0.001084 |
| 7452  | TMCO6    | 198.2465204 | -0.441274183 | 0.121339 | -3.636701 | 0.000276 | 0.000726 |
| 10437 | MTMR4    | 1234.965425 | -0.441427188 | 0.176699 | -2.498182 | 0.012483 | 0.023444 |
| 10911 | LPIN3    | 937.4207    | -0.441805059 | 0.19064  | -2.317485 | 0.020477 | 0.036786 |
| 11725 | CAMK4    | 20.81039799 | -0.441833054 | 0.216049 | -2.045057 | 0.040849 | 0.068289 |
| 11134 | KLHL29   | 234.5781493 | -0.44185218  | 0.197125 | -2.241485 | 0.024995 | 0.044    |
| 7669  | GIT1     | 1496.81334  | -0.442178781 | 0.124506 | -3.551478 | 0.000383 | 0.000979 |
| 8401  | PPP2R5B  | 546.7633572 | -0.442311309 | 0.136176 | -3.248075 | 0.001162 | 0.002711 |
| 8889  | COPE     | 2482.825468 | -0.442431769 | 0.144762 | -3.056269 | 0.002241 | 0.004942 |
| 8134  | SMPD2    | 217.1553771 | -0.442455581 | 0.131743 | -3.358466 | 0.000784 | 0.001889 |
| 6906  | PRR14    | 651.0370264 | -0.442476215 | 0.114578 | -3.861794 | 0.000113 | 0.000319 |

|       |          |             |              |          |           |          |          |
|-------|----------|-------------|--------------|----------|-----------|----------|----------|
| 11647 | MBLAC1   | 46.96339951 | -0.442685743 | 0.214704 | -2.061847 | 0.039222 | 0.066008 |
| 14877 | C7       | 2037.996329 | -0.442734271 | 0.4243   | -1.043447 | 0.296741 | 0.390968 |
| 16268 | KIAA1239 | 0.634666521 | -0.442760096 | 0.697493 | -0.634788 | 0.525567 | 0.633245 |
| 8520  | MYEOV2   | 523.9481394 | -0.44280245  | 0.138465 | -3.197937 | 0.001384 | 0.003184 |
| 14870 | TNNI1    | 15.21999609 | -0.442993653 | 0.423615 | -1.045745 | 0.295679 | 0.389751 |
| 6882  | PARP6    | 826.6050043 | -0.443105998 | 0.114476 | -3.870748 | 0.000109 | 0.000309 |
| 5656  | FAM136A  | 745.6437375 | -0.443214475 | 0.099721 | -4.444567 | 8.81E-06 | 3.05E-05 |
| 5186  | C17orf95 | 440.5427378 | -0.443235728 | 0.094664 | -4.682184 | 2.84E-06 | 1.07E-05 |
| 13374 | NACAD    | 135.7596237 | -0.443372453 | 0.291879 | -1.519027 | 0.128756 | 0.188705 |
| 8014  | CPSF3L   | 1321.299714 | -0.443447075 | 0.130214 | -3.405533 | 0.00066  | 0.001615 |
| 7930  | TBRG4    | 1161.827424 | -0.443477918 | 0.129087 | -3.435494 | 0.000591 | 0.001462 |
| 13387 | NSUN5P1  | 161.3153664 | -0.44352394  | 0.292731 | -1.515127 | 0.12974  | 0.189963 |
| 16234 | UTY      | 195.0160815 | -0.443659391 | 0.687744 | -0.645094 | 0.518867 | 0.626482 |
| 14716 | GPR62    | 3.959955266 | -0.44367633  | 0.406036 | -1.092702 | 0.274525 | 0.365654 |
| 8171  | CAPZA1   | 3185.008545 | -0.443977501 | 0.13272  | -3.345208 | 0.000822 | 0.001972 |
| 3664  | NAGA     | 1326.875564 | -0.444264088 | 0.079896 | -5.56056  | 2.69E-08 | 1.44E-07 |
| 9042  | RFTN1    | 1188.369388 | -0.444408653 | 0.148196 | -2.99879  | 0.002711 | 0.005876 |
| 9960  | BRCA1    | 155.0849915 | -0.444434844 | 0.166585 | -2.667914 | 0.007632 | 0.01502  |
| 16307 | SLITRK1  | 0.373169827 | -0.444506586 | 0.710193 | -0.625895 | 0.531384 | 0.638723 |
| 9461  | FAM114A1 | 553.4127259 | -0.444510932 | 0.156869 | -2.833635 | 0.004602 | 0.009535 |
| 14332 | ARHGEF4  | 10.79152278 | -0.444684411 | 0.364091 | -1.221356 | 0.221951 | 0.303549 |
| 6967  | INTS3    | 2264.533055 | -0.444712785 | 0.115796 | -3.840482 | 0.000123 | 0.000345 |
| 8850  | NOL12    | 261.2716515 | -0.444822534 | 0.144884 | -3.070199 | 0.002139 | 0.004738 |
| 11058 | GCET2    | 22.10767569 | -0.444981345 | 0.195896 | -2.271519 | 0.023116 | 0.040974 |
| 13417 | C7orf68  | 4644.037993 | -0.445127109 | 0.294988 | -1.508967 | 0.131307 | 0.191828 |
| 12153 | ECSCR    | 270.4811694 | -0.445155181 | 0.233056 | -1.910078 | 0.056123 | 0.090524 |
| 10328 | FEZ1     | 210.999463  | -0.445197329 | 0.175458 | -2.537337 | 0.01117  | 0.021199 |
| 12544 | DDX12    | 80.80972519 | -0.445281993 | 0.248417 | -1.792479 | 0.073056 | 0.114156 |
| 6853  | PHB2     | 3569.253525 | -0.44536555  | 0.11481  | -3.879167 | 0.000105 | 0.0003   |
| 14081 | ADAMTSL  | 33.81283935 | -0.44554782  | 0.344518 | -1.293249 | 0.195925 | 0.272731 |
| 14999 | KISS1    | 5.346537294 | -0.445553663 | 0.4423   | -1.007357 | 0.313763 | 0.410032 |
| 11650 | SIGLECP3 | 9.372098277 | -0.445602717 | 0.216204 | -2.061028 | 0.0393   | 0.066122 |
| 13641 | BAIAP2L1 | 585.8334529 | -0.445624059 | 0.309319 | -1.440661 | 0.149681 | 0.215079 |
| 10424 | PHLDB3   | 147.403916  | -0.445833603 | 0.178165 | -2.502363 | 0.012337 | 0.023198 |
| 8802  | RRP12    | 632.0501958 | -0.445855011 | 0.144503 | -3.085433 | 0.002033 | 0.004526 |
| 12283 | APBB1IP  | 1267.04456  | -0.446104105 | 0.238385 | -1.871358 | 0.061296 | 0.097814 |
| 11090 | TBX6     | 51.54643548 | -0.446489782 | 0.197591 | -2.259661 | 0.023842 | 0.04214  |
| 5663  | ZDHHC16  | 550.0829952 | -0.446836413 | 0.100605 | -4.441496 | 8.93E-06 | 3.09E-05 |
| 13990 | TMIE     | 28.95889371 | -0.446925585 | 0.338272 | -1.321202 | 0.186434 | 0.261208 |
| 8150  | NDUFAF2  | 182.2677028 | -0.447063376 | 0.133366 | -3.352162 | 0.000802 | 0.001928 |
| 10072 | CCDC157  | 39.29381038 | -0.447194343 | 0.170203 | -2.627413 | 0.008604 | 0.016744 |
| 14364 | GDF7     | 3.881138454 | -0.447480751 | 0.370123 | -1.209006 | 0.226661 | 0.309299 |
| 8392  | RNF149   | 2033.668567 | -0.447531882 | 0.137605 | -3.252297 | 0.001145 | 0.002674 |
| 8978  | ZNF337   | 611.274301  | -0.447554027 | 0.148159 | -3.02077  | 0.002521 | 0.005505 |
| 11080 | STAT1    | 6734.582508 | -0.447607031 | 0.197797 | -2.262958 | 0.023638 | 0.041814 |
| 9555  | FUCA1    | 2185.591583 | -0.447690935 | 0.159911 | -2.799618 | 0.005116 | 0.010496 |
| 4825  | GOLGA3   | 1703.080844 | -0.448471932 | 0.09195  | -4.877327 | 1.08E-06 | 4.37E-06 |

|       |           |             |              |          |           |          |          |
|-------|-----------|-------------|--------------|----------|-----------|----------|----------|
| 10130 | TNFAIP3   | 1611.003788 | -0.448595017 | 0.172161 | -2.605679 | 0.009169 | 0.017743 |
| 6896  | SGSH      | 901.2154608 | -0.448692735 | 0.116073 | -3.865609 | 0.000111 | 0.000315 |
| 15425 | CALML3    | 4.206074054 | -0.448768211 | 0.508556 | -0.882436 | 0.377541 | 0.479753 |
| 6823  | CEP164    | 441.0378445 | -0.449297023 | 0.115494 | -3.890206 | 0.0001   | 0.000288 |
| 7943  | COMMD6    | 1360.21694  | -0.449403391 | 0.130999 | -3.430576 | 0.000602 | 0.001486 |
| 2575  | SFRS9     | 2068.371219 | -0.449442066 | 0.070144 | -6.407462 | 1.48E-10 | 1.13E-09 |
| 14303 | ATP1A3    | 38.27135067 | -0.449541515 | 0.365748 | -1.229101 | 0.219034 | 0.300166 |
| 8277  | NFKBIL1   | 416.4455414 | -0.449789511 | 0.136233 | -3.301612 | 0.000961 | 0.002277 |
| 12479 | CAMK1G    | 54.09482956 | -0.449862305 | 0.248701 | -1.80885  | 0.070474 | 0.11069  |
| 9191  | ARHGAP24  | 615.7000573 | -0.450227853 | 0.153023 | -2.942219 | 0.003259 | 0.00695  |
| 8738  | SNRNP35   | 459.771338  | -0.450312167 | 0.144649 | -3.113138 | 0.001851 | 0.004152 |
| 10995 | BATF2     | 221.6957584 | -0.450487885 | 0.196747 | -2.289681 | 0.02204  | 0.039291 |
| 12777 | KAL1      | 264.841789  | -0.450509917 | 0.263186 | -1.711758 | 0.086941 | 0.133382 |
| 9295  | FRAT1     | 63.32274754 | -0.450744979 | 0.155348 | -2.901521 | 0.003714 | 0.007831 |
| 14725 | DNAH11    | 571.3088258 | -0.451051936 | 0.413534 | -1.090726 | 0.275393 | 0.366577 |
| 9596  | KIF17     | 58.06314261 | -0.451053124 | 0.1622   | -2.780844 | 0.005422 | 0.011075 |
| 12012 | NDUFS8    | 1429.302745 | -0.451206379 | 0.230561 | -1.956991 | 0.050349 | 0.082158 |
| 7564  | INCENP    | 222.6148009 | -0.451352083 | 0.125683 | -3.591205 | 0.000329 | 0.000853 |
| 11510 | TXNDC6    | 10.43387871 | -0.451455469 | 0.213715 | -2.112419 | 0.034651 | 0.059008 |
| 8205  | GGCT      | 545.4018784 | -0.451663761 | 0.135635 | -3.329986 | 0.000869 | 0.002075 |
| 7949  | LOC341056 | 8.926042163 | -0.45168045  | 0.131744 | -3.428463 | 0.000607 | 0.001497 |
| 15817 | IL13      | 0.375880494 | -0.451736871 | 0.585952 | -0.770945 | 0.440739 | 0.54618  |
| 8964  | MEM161A   | 609.5540913 | -0.452037499 | 0.149398 | -3.025722 | 0.00248  | 0.005424 |
| 10348 | TNFAIP8   | 821.6631318 | -0.452195731 | 0.178782 | -2.529314 | 0.011429 | 0.021648 |
| 6839  | FLAD1     | 576.5281276 | -0.452211836 | 0.116416 | -3.884443 | 0.000103 | 0.000294 |
| 8332  | EDF1      | 3851.866503 | -0.452256336 | 0.137902 | -3.279556 | 0.00104  | 0.002446 |
| 14183 | SH3RF2    | 140.4327129 | -0.452289261 | 0.358387 | -1.262013 | 0.206944 | 0.285998 |
| 9821  | SLC37A1   | 332.138223  | -0.452361396 | 0.166877 | -2.710747 | 0.006713 | 0.013398 |
| 10751 | SULT1A3   | 632.9635668 | -0.452396848 | 0.190045 | -2.380466 | 0.017291 | 0.031524 |
| 13633 | C16orf79  | 21.01243392 | -0.452464598 | 0.313518 | -1.443186 | 0.148968 | 0.21418  |
| 9938  | FAM126A   | 467.3100644 | -0.452556293 | 0.169217 | -2.674417 | 0.007486 | 0.014765 |
| 6325  | CTNBP1    | 411.1129779 | -0.452574834 | 0.109979 | -4.115088 | 3.87E-05 | 0.00012  |
| 8691  | CMIP      | 2625.136034 | -0.452629118 | 0.144387 | -3.134827 | 0.00172  | 0.003878 |
| 12014 | PITPNM3   | 52.28205305 | -0.452857748 | 0.231441 | -1.956684 | 0.050385 | 0.082203 |
| 5370  | COPS7B    | 540.9100609 | -0.453051015 | 0.098861 | -4.582718 | 4.59E-06 | 1.68E-05 |
| 13113 | PDE1A     | 333.6803708 | -0.45306429  | 0.281957 | -1.606858 | 0.108086 | 0.161564 |
| 4672  | NACA      | 15671.85899 | -0.453171091 | 0.091556 | -4.949638 | 7.44E-07 | 3.12E-06 |
| 7414  | C16orf68  | 184.3713883 | -0.453260696 | 0.124186 | -3.649849 | 0.000262 | 0.000694 |
| 4897  | CCDC23    | 241.5431884 | -0.453346835 | 0.0939   | -4.828    | 1.38E-06 | 5.52E-06 |
| 6679  | FIBP      | 1228.749684 | -0.453352038 | 0.114781 | -3.949714 | 7.82E-05 | 0.00023  |
| 10322 | SLC4A8    | 38.92078526 | -0.453354751 | 0.178492 | -2.539913 | 0.011088 | 0.021056 |
| 8494  | TRIO      | 1616.275242 | -0.45359686  | 0.141332 | -3.209442 | 0.00133  | 0.003069 |
| 11901 | ACTR3C    | 117.8066453 | -0.453599351 | 0.228263 | -1.987182 | 0.046902 | 0.077248 |
| 15892 | LOC339788 | 1.350392394 | -0.453768218 | 0.609117 | -0.744961 | 0.456295 | 0.562789 |
| 11811 | TAS2R5    | 10.8643198  | -0.453768438 | 0.224879 | -2.017832 | 0.043609 | 0.072371 |
| 9508  | SLC2A4RC  | 1694.298367 | -0.453967204 | 0.161167 | -2.816759 | 0.004851 | 0.010001 |
| 9438  | TRIM47    | 995.5588831 | -0.454127985 | 0.159784 | -2.842145 | 0.004481 | 0.009306 |

|       |            |             |              |          |           |          |          |
|-------|------------|-------------|--------------|----------|-----------|----------|----------|
| 7439  | EHMT2      | 951.3665477 | -0.454378358 | 0.12479  | -3.641149 | 0.000271 | 0.000715 |
| 12455 | LDB3       | 55.88873816 | -0.454558482 | 0.249962 | -1.818509 | 0.068986 | 0.108567 |
| 16079 | CRNA0016   | 0.298270218 | -0.454614601 | 0.659997 | -0.688814 | 0.490941 | 0.598478 |
| 16641 | FLJ43860   | 0.29939255  | -0.45461466  | 0.845251 | -0.537846 | 0.590684 | 0.695751 |
| 16460 | IL1F9      | 0.268098259 | -0.454614672 | 0.777451 | -0.58475  | 0.558716 | 0.665333 |
| 16682 | PRL        | 0.2406968   | -0.454614734 | 0.869378 | -0.52292  | 0.60103  | 0.706198 |
| 17216 | RNF17      | 0.322294705 | -0.454614763 | 1.180798 | -0.385006 | 0.700233 | 0.797259 |
| 16971 | PROP1      | 0.238924681 | -0.454614819 | 1.020357 | -0.445545 | 0.655926 | 0.757575 |
| 16816 | GLRA4      | 0.181479563 | -0.454614844 | 0.934214 | -0.486628 | 0.626522 | 0.730278 |
| 17293 | KRTAP1-1   | 0.245048339 | -0.454614961 | 1.232855 | -0.36875  | 0.712314 | 0.807383 |
| 17041 | TBC1D3P2   | 0.165038074 | -0.454614971 | 1.057272 | -0.429989 | 0.667204 | 0.767435 |
| 17150 | OR1F1      | 0.208451493 | -0.454614972 | 1.141117 | -0.398395 | 0.690339 | 0.788999 |
| 17279 | IRGC       | 0.142489302 | -0.454615167 | 1.22092  | -0.372355 | 0.709629 | 0.804991 |
| 17376 | DAZL       | 0.188451739 | -0.454615167 | 1.309619 | -0.347135 | 0.72849  | 0.821773 |
| 17280 | C12orf40   | 0.141946809 | -0.454615168 | 1.221326 | -0.372231 | 0.709721 | 0.805049 |
| 17496 | TMPRSS15   | 0.225561223 | -0.454615188 | 1.442477 | -0.315163 | 0.752638 | 0.843142 |
| 17386 | MYH2       | 0.161720385 | -0.454615227 | 1.318564 | -0.344781 | 0.730259 | 0.823295 |
| 17489 | TMEFF2     | 0.200348745 | -0.45461524  | 1.434558 | -0.316903 | 0.751317 | 0.842048 |
| 17382 | C12orf54   | 0.146842647 | -0.454615275 | 1.316769 | -0.345251 | 0.729906 | 0.823001 |
| 17384 | SNORD15A   | 0.146732245 | -0.454615275 | 1.316859 | -0.345227 | 0.729924 | 0.823001 |
| 17602 | FOXB2      | 0.183728479 | -0.454615431 | 1.549813 | -0.293336 | 0.769266 | 0.856629 |
| 17487 | ALPPL2     | 0.12873636  | -0.454615474 | 1.432581 | -0.31734  | 0.750986 | 0.841772 |
| 17608 | TBR1       | 0.16407266  | -0.454615507 | 1.555418 | -0.292279 | 0.770074 | 0.857236 |
| 17819 | KRTAP5-5   | 0.186416225 | -0.454615859 | 1.87592  | -0.242343 | 0.808515 | 0.889371 |
| 17718 | LIN28A     | 0.12236626  | -0.454615916 | 1.729394 | -0.262876 | 0.792646 | 0.876886 |
| 17827 | LOC415056  | 0.150934135 | -0.454616087 | 1.89071  | -0.240447 | 0.809984 | 0.890617 |
| 17832 | C13orf30   | 0.141062938 | -0.454616101 | 1.899217 | -0.23937  | 0.810818 | 0.891247 |
| 17749 | ZAR1L      | 0.086809306 | -0.454616169 | 1.773117 | -0.256394 | 0.797647 | 0.880876 |
| 17849 | KIFZP434H1 | 0.107924829 | -0.454616367 | 1.929304 | -0.235637 | 0.813714 | 0.893435 |
| 18141 | DCAF8L2    | 0.242046169 | -0.454616484 | 2.578114 | -0.176337 | 0.860029 | 0.929245 |
| 17879 | SDR9C7     | 0.086293147 | -0.45461656  | 1.970942 | -0.23066  | 0.817579 | 0.896274 |
| 17971 | BARHL2     | 0.125444557 | -0.454616651 | 2.134413 | -0.212994 | 0.831332 | 0.906735 |
| 18001 | LOC390858  | 0.087023859 | -0.454617083 | 2.207988 | -0.205897 | 0.836872 | 0.911256 |
| 17998 | C13orf26   | 0.087641408 | -0.454617083 | 2.208203 | -0.205876 | 0.836887 | 0.911256 |
| 18117 | PROL1      | 0.084271144 | -0.454617855 | 2.517547 | -0.18058  | 0.856697 | 0.926871 |
| 18121 | FAM47C     | 0.082956752 | -0.454617877 | 2.525748 | -0.179993 | 0.857158 | 0.927165 |
| 18176 | OR6S1      | 0.138744078 | -0.454618148 | 2.700206 | -0.168364 | 0.866297 | 0.934214 |
| 18229 | GIP        | 0.122064981 | -0.454618502 | 2.91407  | -0.156008 | 0.876027 | 0.941374 |
| 18235 | SPANXE     | 0.103112726 | -0.454618747 | 2.91407  | -0.156008 | 0.876027 | 0.941374 |
| 18236 | SPRR2G     | 0.107413951 | -0.454618747 | 2.91407  | -0.156008 | 0.876027 | 0.941374 |
| 18219 | CSH2       | 0.090449766 | -0.454618863 | 2.871988 | -0.158294 | 0.874225 | 0.940588 |
| 18224 | CXorf64    | 0.087558471 | -0.454618923 | 2.891578 | -0.157222 | 0.87507  | 0.94118  |
| 18227 | CASP14     | 0.084985853 | -0.454618967 | 2.905991 | -0.156442 | 0.875685 | 0.941374 |
| 18238 | TTY20      | 0.085319782 | -0.454618992 | 2.91407  | -0.156008 | 0.876027 | 0.941374 |
| 18231 | LHX5       | 0.085106656 | -0.454618992 | 2.91407  | -0.156008 | 0.876027 | 0.941374 |
| 18234 | OR5M11     | 0.08482072  | -0.454618992 | 2.91407  | -0.156008 | 0.876027 | 0.941374 |
| 18239 | TTY2       | 0.081781476 | -0.454618992 | 2.91407  | -0.156008 | 0.876027 | 0.941374 |

|       |           |             |              |          |           |          |          |
|-------|-----------|-------------|--------------|----------|-----------|----------|----------|
| 13536 | KCNV2     | 1.807176338 | -0.454635398 | 0.308363 | -1.474352 | 0.140387 | 0.203289 |
| 6595  | TAF6      | 1141.598562 | -0.45488807  | 0.114149 | -3.985023 | 6.75E-05 | 0.000201 |
| 11128 | NLRP1     | 453.9220529 | -0.455092186 | 0.202883 | -2.243124 | 0.024889 | 0.043839 |
| 6912  | C12orf47  | 287.3749156 | -0.455249838 | 0.117986 | -3.858515 | 0.000114 | 0.000323 |
| 12428 | RSAD2     | 297.7135426 | -0.455250985 | 0.24915  | -1.827213 | 0.067668 | 0.106723 |
| 5803  | NOB1      | 978.0785029 | -0.455338091 | 0.104116 | -4.373381 | 1.22E-05 | 4.13E-05 |
| 8204  | MEM150A   | 656.7817321 | -0.455442703 | 0.136729 | -3.330984 | 0.000865 | 0.002068 |
| 8124  | FAM98C    | 245.023312  | -0.4556803   | 0.135594 | -3.360625 | 0.000778 | 0.001876 |
| 7934  | RPS6KA1   | 1007.916605 | -0.455776633 | 0.132709 | -3.434405 | 0.000594 | 0.001467 |
| 6971  | C15orf23  | 166.6756399 | -0.456058156 | 0.118766 | -3.839971 | 0.000123 | 0.000346 |
| 6443  | GABARAP   | 7170.137725 | -0.456059674 | 0.112528 | -4.05284  | 5.06E-05 | 0.000154 |
| 10868 | GRIN2C    | 12.554059   | -0.456088479 | 0.195437 | -2.333683 | 0.019612 | 0.035372 |
| 14262 | SLC23A1   | 279.5613236 | -0.456362379 | 0.368029 | -1.240017 | 0.214969 | 0.295443 |
| 10983 | VAMP1     | 175.9109012 | -0.456543252 | 0.199152 | -2.292437 | 0.02188  | 0.039049 |
| 13216 | AGT       | 2583.454058 | -0.45667452  | 0.289995 | -1.574769 | 0.11531  | 0.171019 |
| 4735  | XPO6      | 1702.582459 | -0.457109206 | 0.092969 | -4.916808 | 8.80E-07 | 3.64E-06 |
| 15558 | ASB4      | 1.690014959 | -0.457413904 | 0.54154  | -0.844654 | 0.398304 | 0.50181  |
| 7548  | LPCAT4    | 361.4210769 | -0.457476103 | 0.127233 | -3.595583 | 0.000324 | 0.000841 |
| 3494  | MED8      | 587.5579965 | -0.457561528 | 0.080579 | -5.678392 | 1.36E-08 | 7.63E-08 |
| 7224  | FKBPL     | 111.7959737 | -0.45768209  | 0.122483 | -3.736711 | 0.000186 | 0.000506 |
| 6612  | IKBKG     | 383.0479136 | -0.457701562 | 0.11503  | -3.97898  | 6.92E-05 | 0.000205 |
| 7051  | TSEN54    | 335.8257736 | -0.457712399 | 0.120439 | -3.80036  | 0.000144 | 0.000402 |
| 14953 | KCNH7     | 0.673086209 | -0.457724074 | 0.447916 | -1.021897 | 0.30683  | 0.402205 |
| 5820  | STARD3    | 837.8903388 | -0.457746933 | 0.104906 | -4.363406 | 1.28E-05 | 4.31E-05 |
| 8478  | ATP5E     | 4171.469078 | -0.457792473 | 0.142334 | -3.216329 | 0.001298 | 0.003002 |
| 3516  | COPZ1     | 3913.202545 | -0.45785468  | 0.080854 | -5.662721 | 1.49E-08 | 8.31E-08 |
| 8816  | CCDC130   | 411.4886784 | -0.458126453 | 0.148622 | -3.082488 | 0.002053 | 0.004564 |
| 8258  | ZMIZ2     | 2498.22248  | -0.458219764 | 0.138438 | -3.309916 | 0.000933 | 0.002215 |
| 12752 | SLC22A17  | 666.2301742 | -0.45826409  | 0.26683  | -1.717441 | 0.085899 | 0.132034 |
| 5400  | TMEM206   | 167.9777731 | -0.45834555  | 0.100389 | -4.565706 | 4.98E-06 | 1.81E-05 |
| 8885  | LY6G5C    | 25.22973791 | -0.458879536 | 0.150063 | -3.05791  | 0.002229 | 0.004917 |
| 10661 | MMD       | 434.8239325 | -0.458904093 | 0.190568 | -2.408091 | 0.016036 | 0.029484 |
| 11308 | DC1001333 | 91.06587359 | -0.45901318  | 0.210925 | -2.176187 | 0.029541 | 0.051206 |
| 6875  | ZNF642    | 93.43754394 | -0.45901906  | 0.118503 | -3.87348  | 0.000107 | 0.000306 |
| 3895  | NUP62     | 1352.09268  | -0.459244084 | 0.084943 | -5.406511 | 6.43E-08 | 3.23E-07 |
| 15302 | TBC1D26   | 0.866661869 | -0.459322191 | 0.499107 | -0.920287 | 0.357423 | 0.457838 |
| 6358  | PRKD2     | 1227.654    | -0.459550868 | 0.112152 | -4.09757  | 4.18E-05 | 0.000129 |
| 10237 | RASA4P    | 142.6416579 | -0.459698162 | 0.178841 | -2.570434 | 0.010157 | 0.019448 |
| 12973 | KCNC3     | 344.6092258 | -0.459736271 | 0.278339 | -1.651713 | 0.098593 | 0.148965 |
| 12953 | GALNT14   | 4580.666456 | -0.459886412 | 0.277759 | -1.655703 | 0.097782 | 0.147968 |
| 15715 | CALR3     | 0.406807098 | -0.460342472 | 0.575591 | -0.799774 | 0.423842 | 0.528649 |
| 6127  | SEPN1     | 2734.33904  | -0.460614457 | 0.109454 | -4.208296 | 2.57E-05 | 8.23E-05 |
| 14663 | ZFR2      | 1.560929742 | -0.460819722 | 0.414454 | -1.111871 | 0.266194 | 0.355839 |
| 8652  | MRPS21    | 984.2435879 | -0.460958749 | 0.146333 | -3.150067 | 0.001632 | 0.003698 |
| 11270 | VWA1      | 2768.178922 | -0.461196989 | 0.210402 | -2.191979 | 0.028381 | 0.049361 |
| 6568  | DNMT1     | 811.5797408 | -0.461267971 | 0.115421 | -3.99639  | 6.43E-05 | 0.000192 |
| 6417  | UBE2O     | 663.3005266 | -0.46130695  | 0.113354 | -4.069612 | 4.71E-05 | 0.000144 |

|       |           |             |              |          |           |          |          |
|-------|-----------|-------------|--------------|----------|-----------|----------|----------|
| 8491  | RNF122    | 242.1981417 | -0.461475469 | 0.143723 | -3.210867 | 0.001323 | 0.003055 |
| 16485 | MYOD1     | 0.592953934 | -0.46209419  | 0.802405 | -0.575887 | 0.564692 | 0.671349 |
| 13437 | LOC149134 | 11.66081561 | -0.462180446 | 0.307294 | -1.504036 | 0.132572 | 0.193388 |
| 8900  | ABCB8     | 654.573905  | -0.462183318 | 0.151423 | -3.052274 | 0.002271 | 0.005002 |
| 11514 | CRNA0016  | 3.675865902 | -0.462368065 | 0.218949 | -2.111766 | 0.034707 | 0.059083 |
| 6029  | MED15     | 1824.453599 | -0.462377333 | 0.108737 | -4.252235 | 2.12E-05 | 6.88E-05 |
| 5737  | PRCC      | 1182.575067 | -0.462513543 | 0.105053 | -4.402671 | 1.07E-05 | 3.65E-05 |
| 15004 | PTCHD1    | 1.361398566 | -0.462823733 | 0.459819 | -1.006534 | 0.314159 | 0.410412 |
| 16230 | SNORD94   | 0.450177543 | -0.463183432 | 0.716521 | -0.646434 | 0.517998 | 0.625588 |
| 11743 | ZNF521    | 323.3929164 | -0.463299243 | 0.227211 | -2.039068 | 0.041443 | 0.069176 |
| 10320 | GLUL      | 11497.02612 | -0.463342793 | 0.182352 | -2.540924 | 0.011056 | 0.021    |
| 6287  | FKBP1A    | 5695.55169  | -0.463396841 | 0.112029 | -4.136388 | 3.53E-05 | 0.00011  |
| 6908  | PHC2      | 4257.299314 | -0.46354928  | 0.120081 | -3.860291 | 0.000113 | 0.000321 |
| 8299  | CYB561D2  | 310.1036224 | -0.463584679 | 0.140733 | -3.294072 | 0.000987 | 0.002332 |
| 16775 | LRRC26    | 0.492614704 | -0.46418502  | 0.933078 | -0.497477 | 0.618852 | 0.723107 |
| 15616 | C17orf73  | 0.602803262 | -0.464191318 | 0.558182 | -0.831612 | 0.405628 | 0.509139 |
| 7364  | C1orf57   | 765.6800159 | -0.464222286 | 0.126399 | -3.672686 | 0.00024  | 0.000639 |
| 5146  | VPS16     | 842.8716931 | -0.464874321 | 0.098814 | -4.704516 | 2.54E-06 | 9.69E-06 |
| 4475  | RAN       | 3630.116233 | -0.464897861 | 0.091965 | -5.055184 | 4.30E-07 | 1.88E-06 |
| 11948 | DC1001322 | 270.1104303 | -0.465025633 | 0.235412 | -1.97537  | 0.048226 | 0.079116 |
| 15126 | RORB      | 3.418978782 | -0.465084475 | 0.481298 | -0.966313 | 0.333888 | 0.432668 |
| 7093  | ANKRD16   | 148.8841274 | -0.465091208 | 0.1228   | -3.787398 | 0.000152 | 0.000421 |
| 12128 | DPRXP4    | 3.51303678  | -0.46518421  | 0.242465 | -1.918561 | 0.05504  | 0.088954 |
| 9046  | MRPS26    | 754.6667909 | -0.46521871  | 0.155202 | -2.997498 | 0.002722 | 0.005898 |
| 4397  | GNG5      | 1464.36252  | -0.465371559 | 0.091148 | -5.105653 | 3.30E-07 | 1.47E-06 |
| 6776  | HEATR2    | 815.6570935 | -0.465389129 | 0.119071 | -3.908516 | 9.29E-05 | 0.000269 |
| 10353 | ADAT3     | 40.4949649  | -0.465408042 | 0.184172 | -2.527031 | 0.011503 | 0.021779 |
| 11920 | PARD6A    | 100.9884646 | -0.465722396 | 0.234938 | -1.982317 | 0.047444 | 0.07802  |
| 7164  | C19orf56  | 1641.537413 | -0.465977061 | 0.124009 | -3.757613 | 0.000172 | 0.000469 |
| 11072 | TLR1      | 278.3698815 | -0.465982973 | 0.205698 | -2.265373 | 0.02349  | 0.041587 |
| 10756 | APCDD1    | 359.2184717 | -0.466128544 | 0.195899 | -2.37943  | 0.017339 | 0.031598 |
| 6487  | CENPB     | 2132.487349 | -0.466144554 | 0.11556  | -4.033772 | 5.49E-05 | 0.000166 |
| 6445  | TBC1D22A  | 488.8659046 | -0.466190526 | 0.115059 | -4.051761 | 5.08E-05 | 0.000155 |
| 10385 | ECT2      | 448.1036817 | -0.466707936 | 0.185856 | -2.511121 | 0.012035 | 0.022715 |
| 9429  | XRCC3     | 134.3013915 | -0.466926575 | 0.163986 | -2.847365 | 0.004408 | 0.009164 |
| 4123  | PTDSS1    | 1542.422102 | -0.467097644 | 0.088641 | -5.269523 | 1.37E-07 | 6.50E-07 |
| 13337 | SGCA      | 33.42542103 | -0.467175242 | 0.304954 | -1.531953 | 0.125534 | 0.184494 |
| 7346  | RPL10A    | 9176.789131 | -0.467223896 | 0.126838 | -3.683624 | 0.00023  | 0.000614 |
| 6147  | KRI1      | 594.1287291 | -0.467287045 | 0.111175 | -4.203185 | 2.63E-05 | 8.39E-05 |
| 5215  | KDELRL1   | 4530.441825 | -0.4673732   | 0.100028 | -4.672411 | 2.98E-06 | 1.12E-05 |
| 8432  | MGC16275  | 41.84015624 | -0.467422406 | 0.144441 | -3.236083 | 0.001212 | 0.002817 |
| 6195  | PDIA3P    | 3176.147585 | -0.467492704 | 0.111911 | -4.177344 | 2.95E-05 | 9.33E-05 |
| 10955 | BRCA2     | 78.64282785 | -0.467513848 | 0.203098 | -2.301917 | 0.02134  | 0.038182 |
| 8344  | CDC34     | 770.9486647 | -0.46801192  | 0.142869 | -3.275801 | 0.001054 | 0.002475 |
| 12499 | PILRB     | 1299.621913 | -0.468126376 | 0.259396 | -1.804678 | 0.071125 | 0.111539 |
| 5655  | C7orf49   | 1102.456836 | -0.468418689 | 0.10538  | -4.445023 | 8.79E-06 | 3.05E-05 |
| 5440  | BRE       | 898.6940394 | -0.468489648 | 0.103048 | -4.546319 | 5.46E-06 | 1.97E-05 |



|       |          |             |              |          |           |          |          |
|-------|----------|-------------|--------------|----------|-----------|----------|----------|
| 3132  | SSRP1    | 2844.549805 | -0.468942122 | 0.078968 | -5.938388 | 2.88E-09 | 1.80E-08 |
| 6843  | SART1    | 1159.669708 | -0.468960158 | 0.120788 | -3.882493 | 0.000103 | 0.000296 |
| 15712 | C2orf61  | 0.529158326 | -0.469007022 | 0.585815 | -0.800606 | 0.42336  | 0.528149 |
| 16091 | EIF1AY   | 242.5110025 | -0.469060887 | 0.685966 | -0.683796 | 0.494104 | 0.601885 |
| 13107 | PCDHB3   | 100.5100653 | -0.469304132 | 0.29179  | -1.608362 | 0.107756 | 0.161148 |
| 14211 | ACSM1    | 23.07003216 | -0.469491861 | 0.374536 | -1.25353  | 0.210013 | 0.289626 |
| 4499  | EXT2     | 2186.874463 | -0.469629394 | 0.093189 | -5.039563 | 4.67E-07 | 2.03E-06 |
| 9249  | FBXO22OS | 59.92350187 | -0.469634763 | 0.160855 | -2.919613 | 0.003505 | 0.007427 |
| 6917  | SLC25A28 | 632.7606979 | -0.469686967 | 0.121772 | -3.857113 | 0.000115 | 0.000325 |
| 8191  | CTU2     | 221.5730749 | -0.46969785  | 0.140732 | -3.337534 | 0.000845 | 0.002023 |
| 11868 | CD79B    | 137.3785513 | -0.469939009 | 0.234854 | -2.00098  | 0.045395 | 0.074967 |
| 7395  | SS18L2   | 214.0205041 | -0.470350298 | 0.128558 | -3.658671 | 0.000254 | 0.000672 |
| 9446  | RTEL1    | 489.986906  | -0.470459127 | 0.165659 | -2.839925 | 0.004512 | 0.009364 |
| 6663  | ADCK2    | 904.9128291 | -0.470901505 | 0.119018 | -3.956557 | 7.60E-05 | 0.000224 |
| 8228  | RAB32    | 799.9581792 | -0.471000916 | 0.1418   | -3.321582 | 0.000895 | 0.002132 |
| 4732  | DAZAP1   | 1324.570947 | -0.471016842 | 0.095786 | -4.917411 | 8.77E-07 | 3.63E-06 |
| 9956  | GIMAP1   | 243.3849846 | -0.471205405 | 0.176571 | -2.668649 | 0.007616 | 0.014993 |
| 8326  | ADRBK2   | 413.9510029 | -0.471326844 | 0.143655 | -3.280963 | 0.001035 | 0.002435 |
| 12287 | OSGIN1   | 315.0229873 | -0.471469707 | 0.252199 | -1.869437 | 0.061562 | 0.098208 |
| 5345  | CCDC22   | 481.3594419 | -0.471517871 | 0.10259  | -4.596126 | 4.30E-06 | 1.58E-05 |
| 13595 | FLJ26850 | 1.609317704 | -0.471683655 | 0.323718 | -1.457084 | 0.145093 | 0.209192 |
| 12412 | SAMD3    | 65.20504202 | -0.471717444 | 0.25742  | -1.83248  | 0.06688  | 0.10562  |
| 15622 | SFTA2    | 1.032102658 | -0.471931622 | 0.568949 | -0.82948  | 0.406833 | 0.510484 |
| 13317 | D4S234E  | 17.24370948 | -0.472229622 | 0.307003 | -1.538192 | 0.124002 | 0.182515 |
| 7724  | COMMD7   | 1512.71958  | -0.472233255 | 0.133738 | -3.53102  | 0.000414 | 0.00105  |
| 14465 | C2orf66  | 1.297399155 | -0.472244722 | 0.400725 | -1.178474 | 0.238608 | 0.323328 |
| 5126  | DNMT3A   | 387.7484313 | -0.472383458 | 0.10019  | -4.71488  | 2.42E-06 | 9.25E-06 |
| 11457 | RAB41    | 2.318903517 | -0.47243995  | 0.221593 | -2.132017 | 0.033005 | 0.056467 |
| 12502 | ADAMTS3  | 90.00489112 | -0.472452587 | 0.261979 | -1.803395 | 0.071326 | 0.111827 |
| 13218 | ENHO     | 5.248086494 | -0.474070448 | 0.301063 | -1.574653 | 0.115337 | 0.171033 |
| 6675  | SMUG1    | 574.3585354 | -0.47422045  | 0.119985 | -3.952336 | 7.74E-05 | 0.000227 |
| 12161 | P2RY13   | 178.8554955 | -0.474243066 | 0.248596 | -1.907689 | 0.056431 | 0.090953 |
| 15831 | LCN6     | 0.651004829 | -0.474421397 | 0.619141 | -0.766258 | 0.443523 | 0.549144 |
| 8269  | SNX33    | 1499.677853 | -0.47448167  | 0.143598 | -3.304247 | 0.000952 | 0.002257 |
| 4444  | SMPD4    | 1396.621246 | -0.474650877 | 0.093502 | -5.076368 | 3.85E-07 | 1.70E-06 |
| 7462  | NAT6     | 127.9534539 | -0.474671509 | 0.130674 | -3.632486 | 0.000281 | 0.000737 |
| 5659  | CDK2AP1  | 2282.329026 | -0.47480045  | 0.106856 | -4.443382 | 8.86E-06 | 3.07E-05 |
| 13217 | HTR1F    | 40.82160957 | -0.474810059 | 0.301521 | -1.574717 | 0.115322 | 0.171024 |
| 6352  | HMGB2    | 1339.228329 | -0.474983473 | 0.115864 | -4.099503 | 4.14E-05 | 0.000128 |
| 14430 | RFPL4A   | 2.819331191 | -0.475281809 | 0.399849 | -1.188653 | 0.234576 | 0.318637 |
| 8048  | ALDOA    | 48142.11904 | -0.475719256 | 0.140199 | -3.393168 | 0.000691 | 0.001683 |
| 10935 | NDUFA3   | 841.1296387 | -0.475726087 | 0.206103 | -2.308201 | 0.020988 | 0.037621 |
| 12347 | WBP2NL   | 9.414357195 | -0.476087838 | 0.257386 | -1.849703 | 0.064356 | 0.102166 |
| 12060 | CLIP3    | 579.0933938 | -0.476191348 | 0.245267 | -1.941523 | 0.052195 | 0.084832 |
| 15499 | FP91-CNT | 0.961806793 | -0.476459012 | 0.552983 | -0.861616 | 0.388899 | 0.491825 |
| 12679 | CCDC114  | 13.21314233 | -0.476513065 | 0.273049 | -1.745157 | 0.080958 | 0.125156 |
| 13358 | RBP5     | 4263.369272 | -0.476756599 | 0.312696 | -1.524663 | 0.127343 | 0.186858 |

|       |           |             |              |          |           |          |          |
|-------|-----------|-------------|--------------|----------|-----------|----------|----------|
| 9931  | C5orf34   | 31.23760904 | -0.476789018 | 0.178105 | -2.677007 | 0.007428 | 0.01466  |
| 15519 | GRIA2     | 1.122261064 | -0.476918822 | 0.559127 | -0.85297  | 0.393676 | 0.497225 |
| 11176 | LOC149837 | 48.63288762 | -0.476947489 | 0.21385  | -2.230285 | 0.025729 | 0.04512  |
| 5946  | DNAJC17   | 209.7322158 | -0.477058278 | 0.111124 | -4.293041 | 1.76E-05 | 5.81E-05 |
| 9766  | ELMO1     | 859.4102118 | -0.477274831 | 0.175103 | -2.725677 | 0.006417 | 0.012879 |
| 13026 | FLT3      | 22.46348443 | -0.477351183 | 0.291916 | -1.635235 | 0.102    | 0.153485 |
| 9703  | SOX4      | 1616.334147 | -0.477406789 | 0.173862 | -2.745899 | 0.006035 | 0.01219  |
| 11763 | HAS3      | 74.43272578 | -0.477488794 | 0.234881 | -2.032896 | 0.042063 | 0.070091 |
| 4405  | CDK2      | 519.8735352 | -0.477851045 | 0.093693 | -5.100154 | 3.39E-07 | 1.51E-06 |
| 10180 | SAMD10    | 167.3734404 | -0.477865539 | 0.184555 | -2.58928  | 0.009618 | 0.018516 |
| 5327  | GTDC1     | 398.1419968 | -0.477962349 | 0.103703 | -4.608941 | 4.05E-06 | 1.49E-05 |
| 13707 | GGTLC2    | 508.7382861 | -0.478169499 | 0.337676 | -1.41606  | 0.156758 | 0.224164 |
| 9814  | C11orf83  | 309.4399142 | -0.478333292 | 0.176301 | -2.713165 | 0.006664 | 0.01331  |
| 6152  | WDR45     | 1281.041753 | -0.478501393 | 0.113876 | -4.201943 | 2.65E-05 | 8.43E-05 |
| 9315  | FLJ35776  | 134.2444797 | -0.478502842 | 0.165309 | -2.894598 | 0.003796 | 0.007989 |
| 9863  | NFKB2     | 1496.038639 | -0.478682835 | 0.177347 | -2.699138 | 0.006952 | 0.013816 |
| 6714  | TSGA14    | 211.3939907 | -0.478884493 | 0.12168  | -3.935621 | 8.30E-05 | 0.000242 |
| 10888 | ULBP3     | 30.8296157  | -0.478915909 | 0.206091 | -2.323804 | 0.020136 | 0.03625  |
| 10978 | POLE2     | 25.81730276 | -0.479469715 | 0.208966 | -2.294492 | 0.021762 | 0.038859 |
| 12237 | APLNR     | 1270.089659 | -0.479613365 | 0.254251 | -1.886376 | 0.059244 | 0.094896 |
| 6083  | YWHAG     | 5802.37321  | -0.479962954 | 0.113537 | -4.227355 | 2.36E-05 | 7.62E-05 |
| 5117  | ACTG1     | 47132.5205  | -0.480096007 | 0.101734 | -4.719143 | 2.37E-06 | 9.07E-06 |
| 4336  | RNF7      | 1444.239526 | -0.480174472 | 0.093459 | -5.137797 | 2.78E-07 | 1.26E-06 |
| 6800  | NOMO1     | 4506.115615 | -0.480413758 | 0.123176 | -3.90022  | 9.61E-05 | 0.000277 |
| 7060  | DC1001909 | 142.1499206 | -0.48058917  | 0.126554 | -3.797496 | 0.000146 | 0.000406 |
| 10396 | C9orf116  | 111.8352338 | -0.480677734 | 0.191647 | -2.50814  | 0.012137 | 0.022882 |
| 6528  | FBXO4     | 200.7532212 | -0.480914451 | 0.119798 | -4.014366 | 5.96E-05 | 0.000179 |
| 9294  | C21orf70  | 169.9587702 | -0.480947087 | 0.165714 | -2.902268 | 0.003705 | 0.007813 |
| 11480 | CSPG4     | 2918.198048 | -0.480952512 | 0.226109 | -2.127086 | 0.033413 | 0.057049 |
| 10613 | HSD11B1L  | 119.1841301 | -0.481112832 | 0.19778  | -2.432567 | 0.014992 | 0.027689 |
| 11434 | CRNA0017  | 18.81463276 | -0.481204632 | 0.224998 | -2.138702 | 0.03246  | 0.055645 |
| 3805  | C16orf57  | 768.10428   | -0.481218633 | 0.087973 | -5.470063 | 4.50E-08 | 2.32E-07 |
| 2779  | EFTUD2    | 1798.054107 | -0.481519026 | 0.077487 | -6.214161 | 5.16E-10 | 3.64E-09 |
| 11774 | C14orf49  | 27.53697672 | -0.481839696 | 0.237437 | -2.029336 | 0.042424 | 0.070626 |
| 10833 | WDR54     | 488.348581  | -0.482244802 | 0.205333 | -2.348594 | 0.018844 | 0.034097 |
| 6792  | PVRL2     | 2046.605966 | -0.482389757 | 0.123598 | -3.902906 | 9.50E-05 | 0.000274 |
| 10014 | FAM102B   | 499.342476  | -0.482463928 | 0.182159 | -2.648585 | 0.008083 | 0.015821 |
| 15291 | NKAIN4    | 237.4658325 | -0.482815007 | 0.52306  | -0.923059 | 0.355977 | 0.456314 |
| 7534  | COPG2     | 315.0855092 | -0.482841204 | 0.134033 | -3.60241  | 0.000315 | 0.00082  |
| 6617  | GEMIN6    | 205.2272082 | -0.483123079 | 0.121469 | -3.977328 | 6.97E-05 | 0.000206 |
| 8824  | C14orf145 | 67.70616565 | -0.48349963  | 0.156908 | -3.081414 | 0.00206  | 0.004576 |
| 8804  | KNTC1     | 359.8635626 | -0.483542589 | 0.15673  | -3.085193 | 0.002034 | 0.004529 |
| 8863  | GFER      | 470.3745179 | -0.483552494 | 0.157747 | -3.065359 | 0.002174 | 0.004808 |
| 6682  | RABL5     | 772.7789261 | -0.483978921 | 0.12258  | -3.948255 | 7.87E-05 | 0.000231 |
| 13932 | S100A12   | 17.02804398 | -0.484037269 | 0.36101  | -1.340786 | 0.17999  | 0.253229 |
| 14698 | VSIG8     | 1.546061186 | -0.484181439 | 0.440598 | -1.098918 | 0.271804 | 0.362473 |
| 6954  | RPL26     | 10407.12967 | -0.484256593 | 0.125954 | -3.844708 | 0.000121 | 0.00034  |

|       |           |             |              |          |           |          |          |
|-------|-----------|-------------|--------------|----------|-----------|----------|----------|
| 12146 | PRICKLE1  | 214.3135445 | -0.48452625  | 0.253267 | -1.913102 | 0.055735 | 0.089944 |
| 7408  | DC1001281 | 53.19406015 | -0.484609005 | 0.132652 | -3.653237 | 0.000259 | 0.000685 |
| 13587 | SUSD5     | 66.87648738 | -0.484714104 | 0.332311 | -1.458617 | 0.14467  | 0.208706 |
| 12362 | INMT      | 301.2559333 | -0.484823522 | 0.262465 | -1.847194 | 0.064719 | 0.102618 |
| 16586 | PGC       | 0.86013813  | -0.484884971 | 0.879768 | -0.551151 | 0.58153  | 0.687241 |
| 8750  | SEC24D    | 1280.146873 | -0.484893764 | 0.156054 | -3.107226 | 0.001889 | 0.004231 |
| 15491 | FAM157B   | 0.600841813 | -0.484947842 | 0.560938 | -0.86453  | 0.387297 | 0.490053 |
| 4570  | STRADA    | 527.7924106 | -0.484998261 | 0.097018 | -4.99905  | 5.76E-07 | 2.47E-06 |
| 9029  | HPS3      | 1968.98608  | -0.485036944 | 0.161551 | -3.002381 | 0.002679 | 0.005815 |
| 8532  | ZNF485    | 52.01324328 | -0.485123183 | 0.151842 | -3.194912 | 0.001399 | 0.003213 |
| 12306 | AGER      | 82.33730903 | -0.485253291 | 0.260481 | -1.862913 | 0.062475 | 0.09951  |
| 9676  | PLXNA3    | 719.6982791 | -0.485267869 | 0.176125 | -2.75524  | 0.005865 | 0.011881 |
| 7210  | GEMIN7    | 336.7879461 | -0.485642124 | 0.129869 | -3.739472 | 0.000184 | 0.000501 |
| 7973  | MBD3      | 1419.245889 | -0.485733902 | 0.142005 | -3.420549 | 0.000625 | 0.001536 |
| 9384  | SAT1      | 7418.864102 | -0.48583346  | 0.169566 | -2.865157 | 0.004168 | 0.008706 |
| 11204 | MBOAT4    | 6.514561867 | -0.485893148 | 0.218835 | -2.220359 | 0.026394 | 0.046176 |
| 10970 | SOD2      | 29477.80372 | -0.485946195 | 0.211552 | -2.297052 | 0.021616 | 0.038625 |
| 6309  | GLA       | 617.4277352 | -0.486078071 | 0.117946 | -4.1212   | 3.77E-05 | 0.000117 |
| 9414  | LYRM1     | 1104.749939 | -0.486140483 | 0.170435 | -2.852355 | 0.00434  | 0.009036 |
| 13523 | PAPPA     | 133.97871   | -0.486342717 | 0.328578 | -1.480144 | 0.138835 | 0.201235 |
| 6229  | MEA1      | 1185.99892  | -0.486512567 | 0.116839 | -4.163945 | 3.13E-05 | 9.84E-05 |
| 9597  | FAM58A    | 324.9524348 | -0.48664956  | 0.175032 | -2.780342 | 0.00543  | 0.011091 |
| 3336  | ARPC4     | 2893.497833 | -0.486718701 | 0.083999 | -5.794362 | 6.86E-09 | 4.03E-08 |
| 4933  | EXT1      | 920.0095514 | -0.486826343 | 0.101261 | -4.807646 | 1.53E-06 | 6.07E-06 |
| 11500 | KRBA1     | 1161.32154  | -0.486908179 | 0.229903 | -2.117884 | 0.034185 | 0.058266 |
| 7719  | G6PC3     | 1513.252639 | -0.486917491 | 0.137821 | -3.53296  | 0.000411 | 0.001043 |
| 4033  | DSN1      | 314.1618677 | -0.486924468 | 0.09159  | -5.316356 | 1.06E-07 | 5.15E-07 |
| 5996  | FNBP1     | 1339.91839  | -0.486954164 | 0.114056 | -4.269446 | 1.96E-05 | 6.41E-05 |
| 5975  | GTPBP3    | 272.7604859 | -0.487319191 | 0.113858 | -4.280053 | 1.87E-05 | 6.13E-05 |
| 12106 | ADAMTSL   | 305.8814004 | -0.487534891 | 0.252934 | -1.927521 | 0.053915 | 0.087294 |
| 5938  | PRMT1     | 1745.020813 | -0.487623187 | 0.113429 | -4.29894  | 1.72E-05 | 5.66E-05 |
| 9066  | PARP10    | 1908.246915 | -0.487639717 | 0.162984 | -2.99195  | 0.002772 | 0.005993 |
| 12400 | CHRNA10   | 13.13524465 | -0.487651062 | 0.265581 | -1.836165 | 0.066333 | 0.104851 |
| 16070 | SCT       | 0.992786689 | -0.48808331  | 0.705632 | -0.691697 | 0.489128 | 0.596602 |
| 6650  | RDBP      | 1351.767806 | -0.488099384 | 0.123194 | -3.96203  | 7.43E-05 | 0.000219 |
| 9745  | CHSY1     | 1957.667564 | -0.48844867  | 0.178673 | -2.73376  | 0.006262 | 0.012594 |
| 7393  | ADPRHL2   | 995.3939921 | -0.488457619 | 0.133495 | -3.658992 | 0.000253 | 0.000671 |
| 15981 | OPN5      | 0.404233297 | -0.488949867 | 0.68152  | -0.717441 | 0.473102 | 0.580269 |
| 4513  | RAD23A    | 2838.702286 | -0.489007916 | 0.097255 | -5.028075 | 4.95E-07 | 2.15E-06 |
| 8792  | SEPW1     | 3020.001285 | -0.489267182 | 0.158434 | -3.088139 | 0.002014 | 0.00449  |
| 10007 | MCART6    | 18.63564924 | -0.48929718  | 0.18461  | -2.650443 | 0.008039 | 0.015746 |
| 11164 | HIPK4     | 2.526522133 | -0.489497718 | 0.219199 | -2.233118 | 0.025541 | 0.044844 |
| 10549 | CCND2     | 1433.800914 | -0.489767817 | 0.199618 | -2.453526 | 0.014146 | 0.026285 |
| 7420  | C22orf26  | 16.14867308 | -0.490290122 | 0.134369 | -3.648845 | 0.000263 | 0.000696 |
| 3422  | NKIRAS2   | 1007.427238 | -0.4903835   | 0.085624 | -5.727146 | 1.02E-08 | 5.85E-08 |
| 9226  | BTN3A2    | 2654.616419 | -0.490980249 | 0.167645 | -2.928691 | 0.003404 | 0.007232 |
| 6017  | WBSCR22   | 1170.56775  | -0.491039805 | 0.115346 | -4.257092 | 2.07E-05 | 6.75E-05 |

|       |           |             |              |          |           |          |          |
|-------|-----------|-------------|--------------|----------|-----------|----------|----------|
| 12714 | GOLGA8A   | 1151.138694 | -0.491165703 | 0.284254 | -1.727911 | 0.084004 | 0.129508 |
| 7528  | ATOX1     | 1152.237298 | -0.491234636 | 0.136274 | -3.604768 | 0.000312 | 0.000813 |
| 12710 | C19orf18  | 7.430877129 | -0.491303299 | 0.284191 | -1.728777 | 0.083849 | 0.12931  |
| 7152  | POLR1E    | 388.759414  | -0.491311347 | 0.130557 | -3.763193 | 0.000168 | 0.00046  |
| 11505 | HLA-DOA   | 1585.910284 | -0.491320207 | 0.232326 | -2.114788 | 0.034448 | 0.058689 |
| 9275  | COMMD4    | 913.993977  | -0.491532744 | 0.169052 | -2.907589 | 0.003642 | 0.007697 |
| 11689 | TUSC3     | 723.6463902 | -0.491635904 | 0.239404 | -2.053587 | 0.040016 | 0.067104 |
| 6756  | LYRM4     | 329.2982973 | -0.491852021 | 0.125564 | -3.917138 | 8.96E-05 | 0.00026  |
| 12980 | REC8      | 108.2360875 | -0.491891121 | 0.29807  | -1.650253 | 0.098891 | 0.149335 |
| 14669 | LRRTM4    | 6.045770731 | -0.492178725 | 0.442983 | -1.111055 | 0.266544 | 0.356162 |
| 13351 | RNF182    | 30.40987934 | -0.492419481 | 0.322141 | -1.528584 | 0.126367 | 0.185524 |
| 8980  | AURKAIP1  | 1221.362149 | -0.492494418 | 0.163064 | -3.020249 | 0.002526 | 0.005513 |
| 10629 | UQCRCQ    | 2599.036807 | -0.492594051 | 0.203341 | -2.422502 | 0.015414 | 0.028425 |
| 12527 | SELP      | 178.4299981 | -0.492612773 | 0.274152 | -1.796863 | 0.072357 | 0.113244 |
| 11841 | LOC150381 | 99.55324593 | -0.492931999 | 0.245438 | -2.008377 | 0.044603 | 0.073834 |
| 5447  | CCDC92    | 1155.854757 | -0.492987516 | 0.108531 | -4.54236  | 5.56E-06 | 2.00E-05 |
| 12939 | ANKK1     | 10.4143077  | -0.493153222 | 0.296625 | -1.662547 | 0.096403 | 0.146039 |
| 8594  | AHDC1     | 805.3757917 | -0.493309813 | 0.155333 | -3.175826 | 0.001494 | 0.003407 |
| 13418 | CYP2D6    | 11.60961773 | -0.493352296 | 0.326991 | -1.508763 | 0.131359 | 0.19189  |
| 12924 | C4orf44   | 2.358190959 | -0.493935826 | 0.296492 | -1.665933 | 0.095727 | 0.145172 |
| 1365  | PA2G4     | 2934.339179 | -0.493988731 | 0.063563 | -7.771699 | 7.74E-15 | 1.11E-13 |
| 8190  | TRMT2A    | 617.9750758 | -0.494059608 | 0.148008 | -3.338068 | 0.000844 | 0.002019 |
| 7340  | MLXIP     | 1019.041893 | -0.4941399   | 0.134125 | -3.684186 | 0.000229 | 0.000613 |
| 15661 | SOX3      | 0.536994955 | -0.494161569 | 0.603382 | -0.818986 | 0.412795 | 0.516646 |
| 14702 | C9orf144B | 0.792225083 | -0.494241431 | 0.450163 | -1.097916 | 0.272241 | 0.362957 |
| 15724 | ANGPTL7   | 3.655038111 | -0.494362098 | 0.620317 | -0.796951 | 0.42548  | 0.530388 |
| 13780 | ADCY10    | 5.870414592 | -0.4944652   | 0.354877 | -1.393343 | 0.163516 | 0.232589 |
| 6797  | SEC13     | 1540.819578 | -0.494507104 | 0.126771 | -3.900784 | 9.59E-05 | 0.000277 |
| 7671  | STX8      | 397.7604935 | -0.495061102 | 0.139424 | -3.550755 | 0.000384 | 0.000982 |
| 6716  | UBE2J2    | 745.4350487 | -0.495346101 | 0.125904 | -3.934325 | 8.34E-05 | 0.000243 |
| 2391  | H2AFY     | 2610.955329 | -0.495449894 | 0.075447 | -6.566874 | 5.14E-11 | 4.21E-10 |
| 15489 | AIRE      | 1.131343681 | -0.495715844 | 0.572918 | -0.865247 | 0.386903 | 0.489618 |
| 8855  | LOC644936 | 35.58133755 | -0.496104053 | 0.161685 | -3.068331 | 0.002153 | 0.004765 |
| 5267  | SNRPG     | 696.659995  | -0.496127033 | 0.106834 | -4.643888 | 3.42E-06 | 1.27E-05 |
| 11082 | CDK3      | 178.3484097 | -0.496138282 | 0.219274 | -2.262641 | 0.023658 | 0.041844 |
| 11907 | SLC12A5   | 10.30232857 | -0.496223939 | 0.249928 | -1.985465 | 0.047093 | 0.077523 |
| 8437  | PPIC      | 854.8639856 | -0.496400874 | 0.153521 | -3.233441 | 0.001223 | 0.002841 |
| 10775 | PRSS27    | 24.40941432 | -0.496630424 | 0.209261 | -2.373262 | 0.017632 | 0.032074 |
| 10343 | SGOL2     | 106.6914428 | -0.496693169 | 0.196197 | -2.531599 | 0.011354 | 0.021518 |
| 13119 | KIAA1244  | 253.4626819 | -0.496710641 | 0.309367 | -1.605572 | 0.108368 | 0.161912 |
| 13361 | HSD17B2   | 61.79243484 | -0.496914337 | 0.326296 | -1.522895 | 0.127785 | 0.187464 |
| 9435  | MFNG      | 438.3546497 | -0.497035137 | 0.174751 | -2.844251 | 0.004452 | 0.009248 |
| 4239  | MEM185A   | 535.7113402 | -0.497339187 | 0.095894 | -5.186356 | 2.14E-07 | 9.92E-07 |
| 11405 | PLCD3     | 614.5176348 | -0.497359447 | 0.231623 | -2.147282 | 0.031771 | 0.054598 |
| 7686  | EEF1B2    | 4796.838869 | -0.497583838 | 0.140373 | -3.544725 | 0.000393 | 0.001002 |
| 11821 | LY75      | 654.112517  | -0.497658064 | 0.24699  | -2.014894 | 0.043916 | 0.072825 |
| 11290 | MLC1      | 14.30610482 | -0.497671377 | 0.228103 | -2.181784 | 0.029126 | 0.050566 |

|       |           |             |              |          |           |          |          |
|-------|-----------|-------------|--------------|----------|-----------|----------|----------|
| 11349 | FAT2      | 23.27505756 | -0.49768386  | 0.229782 | -2.165892 | 0.030319 | 0.052363 |
| 11436 | TCTEX1D1  | 13.40136371 | -0.497688319 | 0.232761 | -2.138198 | 0.032501 | 0.055705 |
| 7360  | NUDT5     | 799.6366663 | -0.498193563 | 0.135599 | -3.674009 | 0.000239 | 0.000636 |
| 5544  | SAPS1     | 1913.943072 | -0.498310139 | 0.110712 | -4.500978 | 6.76E-06 | 2.39E-05 |
| 10349 | SNX22     | 249.5133889 | -0.498611616 | 0.197195 | -2.528517 | 0.011455 | 0.021695 |
| 11237 | ATAD3B    | 209.8374712 | -0.498713463 | 0.226216 | -2.204593 | 0.027483 | 0.047939 |
| 11675 | STC1      | 4478.425553 | -0.499151686 | 0.242662 | -2.056982 | 0.039688 | 0.066637 |
| 8968  | PTOV1     | 1974.797896 | -0.499164865 | 0.165074 | -3.023894 | 0.002495 | 0.005454 |
| 12879 | NR4A2     | 363.277997  | -0.499196611 | 0.296905 | -1.681334 | 0.092698 | 0.141081 |
| 6676  | BCAP31    | 5971.429334 | -0.49921091  | 0.126321 | -3.951934 | 7.75E-05 | 0.000228 |
| 11463 | ELF3      | 1787.022237 | -0.499269813 | 0.234355 | -2.130396 | 0.033139 | 0.056665 |
| 9422  | HOXC5     | 35.08821395 | -0.499315552 | 0.175169 | -2.85048  | 0.004365 | 0.009081 |
| 7232  | SNHG11    | 145.3483657 | -0.499452505 | 0.133817 | -3.732364 | 0.00019  | 0.000514 |
| 5201  | NANS      | 740.2396207 | -0.499524705 | 0.106799 | -4.677242 | 2.91E-06 | 1.10E-05 |
| 4468  | SF3B4     | 1297.215284 | -0.49952645  | 0.098776 | -5.057188 | 4.25E-07 | 1.87E-06 |
| 8368  | HMBS      | 332.5221293 | -0.499574304 | 0.153053 | -3.264063 | 0.001098 | 0.002573 |
| 11221 | IER2      | 2365.994097 | -0.499631438 | 0.225738 | -2.213323 | 0.026875 | 0.046946 |
| 14447 | WFDC2     | 1421.886734 | -0.49970003  | 0.422126 | -1.183771 | 0.236504 | 0.320877 |
| 9839  | IDH1      | 1970.960641 | -0.500021479 | 0.184718 | -2.706939 | 0.006791 | 0.013528 |
| 14584 | FMO6P     | 0.813094769 | -0.500033467 | 0.438003 | -1.141622 | 0.253611 | 0.340855 |
| 6219  | LOC678655 | 368.0259233 | -0.500102845 | 0.119936 | -4.169742 | 3.05E-05 | 9.61E-05 |
| 10933 | C19orf20  | 104.7237896 | -0.500227287 | 0.216704 | -2.308347 | 0.02098  | 0.037612 |
| 14652 | FMN2      | 3.30275243  | -0.500330195 | 0.44818  | -1.116359 | 0.264268 | 0.35353  |
| 4669  | RNF113A   | 296.7508799 | -0.500444692 | 0.101097 | -4.950138 | 7.42E-07 | 3.11E-06 |
| 9777  | LTBP3     | 2457.498191 | -0.500559348 | 0.183788 | -2.723573 | 0.006458 | 0.012947 |
| 7897  | CHID1     | 1854.727754 | -0.500768894 | 0.145122 | -3.450684 | 0.000559 | 0.001388 |
| 12736 | TOX       | 145.293528  | -0.501202737 | 0.291162 | -1.721385 | 0.085181 | 0.131085 |
| 8457  | C1orf85   | 1667.494178 | -0.501582338 | 0.155514 | -3.225323 | 0.001258 | 0.002916 |
| 9123  | PNKP      | 520.1567184 | -0.50173893  | 0.16905  | -2.967988 | 0.002998 | 0.00644  |
| 9206  | FGD6      | 824.2376912 | -0.50177894  | 0.170918 | -2.935786 | 0.003327 | 0.007083 |
| 13954 | PAQR9     | 9.931804955 | -0.50184575  | 0.376401 | -1.333273 | 0.182442 | 0.256283 |
| 10192 | ELP2P     | 9.842115392 | -0.502077266 | 0.194201 | -2.585345 | 0.009728 | 0.018709 |
| 10159 | KLRG1     | 40.22553634 | -0.50242785  | 0.193505 | -2.596464 | 0.009419 | 0.018173 |
| 9842  | BICD1     | 338.0092545 | -0.502704513 | 0.185762 | -2.706176 | 0.006806 | 0.013553 |
| 9291  | FBXL7     | 422.1889485 | -0.502768627 | 0.1732   | -2.902817 | 0.003698 | 0.007802 |
| 7743  | LRRC20    | 223.6383293 | -0.50297264  | 0.142803 | -3.522152 | 0.000428 | 0.001084 |
| 13071 | MYOCD     | 42.79606892 | -0.503308291 | 0.310236 | -1.622339 | 0.104731 | 0.157052 |
| 10733 | LOH3CR2A  | 37.75268315 | -0.503325085 | 0.210856 | -2.387052 | 0.016984 | 0.031019 |
| 3529  | PHF21A    | 905.153249  | -0.503343926 | 0.089065 | -5.651444 | 1.59E-08 | 8.84E-08 |
| 4131  | TSEN34    | 865.7914621 | -0.503485289 | 0.095674 | -5.262523 | 1.42E-07 | 6.74E-07 |
| 7071  | ERI3      | 1049.247431 | -0.503794957 | 0.132761 | -3.794764 | 0.000148 | 0.00041  |
| 6373  | MAP4K4    | 3452.389249 | -0.503894585 | 0.12314  | -4.092034 | 4.28E-05 | 0.000132 |
| 2789  | DULLARD   | 2027.179446 | -0.50413419  | 0.081293 | -6.201466 | 5.59E-10 | 3.93E-09 |
| 11016 | CSAD      | 380.7678081 | -0.50415151  | 0.220574 | -2.285633 | 0.022276 | 0.039636 |
| 11386 | C11orf35  | 88.16461557 | -0.504152359 | 0.233759 | -2.156716 | 0.031028 | 0.053414 |
| 7640  | RPS6KB2   | 631.6276295 | -0.504186366 | 0.141444 | -3.564577 | 0.000364 | 0.000935 |
| 12335 | POLR2J2   | 338.0850901 | -0.504264596 | 0.272039 | -1.853645 | 0.06379  | 0.101369 |

|       |           |             |              |          |           |          |          |
|-------|-----------|-------------|--------------|----------|-----------|----------|----------|
| 8554  | LAMB1     | 6926.768084 | -0.504370254 | 0.158206 | -3.188066 | 0.001432 | 0.003282 |
| 12790 | IGFBP5    | 35035.61238 | -0.504592844 | 0.295534 | -1.707395 | 0.087749 | 0.134477 |
| 5666  | RASSF1    | 468.4652147 | -0.505080188 | 0.11378  | -4.439085 | 9.03E-06 | 3.13E-05 |
| 7788  | TRADD     | 817.9338086 | -0.505537281 | 0.144231 | -3.505065 | 0.000456 | 0.001149 |
| 6474  | PTCD1     | 335.204619  | -0.505702453 | 0.125139 | -4.041132 | 5.32E-05 | 0.000161 |
| 13453 | FGF7      | 148.8000809 | -0.505779819 | 0.336951 | -1.501048 | 0.133343 | 0.194281 |
| 11746 | RTKN2     | 49.19298156 | -0.50594513  | 0.248262 | -2.037949 | 0.041555 | 0.069344 |
| 15207 | TKTL2     | 0.495751181 | -0.506012666 | 0.535103 | -0.945636 | 0.344334 | 0.443828 |
| 12893 | THEMIS    | 92.07263957 | -0.506518152 | 0.302383 | -1.675089 | 0.093917 | 0.14278  |
| 14554 | GABRP     | 29.50778065 | -0.506575853 | 0.440435 | -1.150173 | 0.250073 | 0.336792 |
| 5071  | TBC1D2B   | 1550.25225  | -0.50660621  | 0.106953 | -4.736729 | 2.17E-06 | 8.40E-06 |
| 7352  | NLE1      | 313.0521672 | -0.507037356 | 0.137816 | -3.679094 | 0.000234 | 0.000624 |
| 12949 | WNT9A     | 6.882465227 | -0.507133998 | 0.305858 | -1.65807  | 0.097303 | 0.147289 |
| 6884  | NACC1     | 1145.892082 | -0.507239648 | 0.13109  | -3.869397 | 0.000109 | 0.000311 |
| 12828 | CCR4      | 27.92540082 | -0.507251278 | 0.299043 | -1.696246 | 0.089839 | 0.137273 |
| 13230 | LCN12     | 44.93137477 | -0.507310025 | 0.322794 | -1.571624 | 0.116038 | 0.171917 |
| 15391 | H1FNT     | 0.386236357 | -0.507345741 | 0.568247 | -0.892826 | 0.37195  | 0.473692 |
| 9661  | FJX1      | 328.8617454 | -0.507735384 | 0.183867 | -2.761434 | 0.005755 | 0.011676 |
| 3589  | TAF12     | 406.0618553 | -0.508092235 | 0.090548 | -5.611277 | 2.01E-08 | 1.10E-07 |
| 8185  | SF3B5     | 1248.649901 | -0.508433003 | 0.152252 | -3.339423 | 0.00084  | 0.00201  |
| 9828  | LDHA      | 45037.01102 | -0.508481742 | 0.18765  | -2.709738 | 0.006734 | 0.01343  |
| 11275 | SYNPO2    | 1327.977884 | -0.509220785 | 0.232718 | -2.188147 | 0.028659 | 0.049822 |
| 15176 | LOC442459 | 0.3918086   | -0.509314818 | 0.533592 | -0.954502 | 0.33983  | 0.438917 |
| 13364 | HSPA7     | 247.7648827 | -0.509535896 | 0.334751 | -1.522132 | 0.127976 | 0.187703 |
| 15949 | PAN-P2RY  | 24.9174536  | -0.509814919 | 0.701597 | -0.726649 | 0.467441 | 0.574494 |
| 6641  | MSTO1     | 556.8733144 | -0.509831003 | 0.128514 | -3.967124 | 7.27E-05 | 0.000215 |
| 11691 | GPR162    | 75.80405966 | -0.509954216 | 0.248356 | -2.053323 | 0.040041 | 0.067133 |
| 7757  | LOC399744 | 92.54902648 | -0.510153842 | 0.145122 | -3.515344 | 0.000439 | 0.00111  |
| 11440 | TSPAN13   | 867.2066254 | -0.510274865 | 0.238723 | -2.137516 | 0.032556 | 0.055781 |
| 6035  | ERCC1     | 919.1733779 | -0.510469477 | 0.120101 | -4.250342 | 2.13E-05 | 6.93E-05 |
| 6998  | C11orf84  | 309.6551027 | -0.510639677 | 0.133522 | -3.824377 | 0.000131 | 0.000367 |
| 16227 | RSPH6A    | 0.497079052 | -0.5109292   | 0.788724 | -0.647792 | 0.517119 | 0.624642 |
| 12469 | FCN1      | 183.9212908 | -0.511179523 | 0.282162 | -1.811655 | 0.070039 | 0.110101 |
| 8184  | TIMM17B   | 611.7807312 | -0.511275761 | 0.153031 | -3.340992 | 0.000835 | 0.001999 |
| 9106  | KPTN      | 118.9658157 | -0.512067693 | 0.17212  | -2.975067 | 0.002929 | 0.006305 |
| 15174 | TAS2R13   | 0.330402894 | -0.512294113 | 0.536252 | -0.955323 | 0.339414 | 0.438438 |
| 16084 | FAM136B   | 0.2743611   | -0.512322412 | 0.745957 | -0.686799 | 0.492209 | 0.599838 |
| 16543 | TULP1     | 0.284319064 | -0.512322462 | 0.912005 | -0.561754 | 0.574284 | 0.680441 |
| 16359 | IL29      | 0.214136006 | -0.5123225   | 0.837857 | -0.611468 | 0.54089  | 0.648083 |
| 16794 | OR51B5    | 0.274187457 | -0.512322509 | 1.042734 | -0.491326 | 0.623196 | 0.727359 |
| 16484 | HIST1H2AI | 0.212841356 | -0.512322523 | 0.889489 | -0.575974 | 0.564633 | 0.671349 |
| 16473 | TEX13B    | 0.190348124 | -0.512322543 | 0.88262  | -0.580457 | 0.561607 | 0.668248 |
| 16701 | CRYBA1    | 0.190262545 | -0.512322629 | 0.987929 | -0.518582 | 0.604052 | 0.708941 |
| 17435 | GYPB      | 0.177110052 | -0.512323095 | 1.550787 | -0.330363 | 0.741125 | 0.833198 |
| 17342 | SNORA52   | 0.132482615 | -0.512323102 | 1.43603  | -0.356763 | 0.721269 | 0.815223 |
| 17560 | PDX1      | 0.174633896 | -0.512323258 | 1.704479 | -0.300575 | 0.763739 | 0.852508 |
| 17457 | HHLA1     | 0.11409899  | -0.512323338 | 1.577468 | -0.324776 | 0.745351 | 0.836868 |

|       |          |             |              |          |           |          |          |
|-------|----------|-------------|--------------|----------|-----------|----------|----------|
| 17578 | KRTDAP   | 0.136810919 | -0.512323448 | 1.721443 | -0.297613 | 0.765999 | 0.854157 |
| 17588 | MYH6     | 0.118520618 | -0.512323543 | 1.728375 | -0.296419 | 0.76691  | 0.854685 |
| 17597 | PAX1     | 0.113309481 | -0.51232356  | 1.740255 | -0.294396 | 0.768456 | 0.85597  |
| 17806 | FOXI3    | 0.160842295 | -0.51232386  | 2.089645 | -0.245173 | 0.806323 | 0.887607 |
| 18094 | TEKT1    | 0.118967852 | -0.512325465 | 2.765243 | -0.185273 | 0.853015 | 0.92406  |
| 18144 | CRYBA2   | 0.097906484 | -0.512326058 | 2.91407  | -0.175811 | 0.860442 | 0.929333 |
| 18145 | CXorf61  | 0.09670454  | -0.512326058 | 2.91407  | -0.175811 | 0.860442 | 0.929333 |
| 18147 | MAS1     | 0.096249164 | -0.512326058 | 2.91407  | -0.175811 | 0.860442 | 0.929333 |
| 18148 | MYL7     | 0.094225501 | -0.512326058 | 2.91407  | -0.175811 | 0.860442 | 0.929333 |
| 18143 | CCDC140  | 0.093495985 | -0.512326058 | 2.91407  | -0.175811 | 0.860442 | 0.929333 |
| 17776 | FRMPD2L1 | 0.328603526 | -0.512388867 | 2.044674 | -0.250597 | 0.802126 | 0.884477 |
| 7181  | UBE2M    | 1108.124764 | -0.512392957 | 0.136571 | -3.751839 | 0.000176 | 0.000479 |
| 12169 | GPR179   | 3.668267978 | -0.512627162 | 0.268849 | -1.906751 | 0.056553 | 0.091091 |
| 12831 | PCDHGB3  | 26.75666123 | -0.51265331  | 0.302389 | -1.695345 | 0.09001  | 0.137502 |
| 4938  | BAK1     | 482.6967205 | -0.512733791 | 0.106706 | -4.805119 | 1.55E-06 | 6.14E-06 |
| 16183 | GADL1    | 0.90450342  | -0.512843459 | 0.779317 | -0.658068 | 0.510494 | 0.618316 |
| 5295  | IFNGR2   | 2518.12167  | -0.51328608  | 0.111006 | -4.62396  | 3.76E-06 | 1.39E-05 |
| 7815  | AP3S1    | 1295.949056 | -0.514014091 | 0.147018 | -3.496255 | 0.000472 | 0.001183 |
| 10427 | ABCB6    | 991.5479751 | -0.514200237 | 0.205607 | -2.500891 | 0.012388 | 0.023288 |
| 7922  | C1orf91  | 277.4524025 | -0.514426389 | 0.149552 | -3.439784 | 0.000582 | 0.00144  |
| 8506  | PVRL1    | 436.6129377 | -0.514490924 | 0.160645 | -3.202653 | 0.001362 | 0.003138 |
| 9050  | LRRC33   | 191.2019594 | -0.514508944 | 0.171711 | -2.996372 | 0.002732 | 0.005917 |
| 5844  | TIMELESS | 411.6183406 | -0.514558121 | 0.118302 | -4.349526 | 1.36E-05 | 4.58E-05 |
| 10054 | DSCC1    | 71.88607276 | -0.514687247 | 0.195392 | -2.634122 | 0.008436 | 0.016446 |
| 6983  | MRPL24   | 1208.63449  | -0.514995966 | 0.134378 | -3.832452 | 0.000127 | 0.000356 |
| 7473  | C15orf39 | 849.432544  | -0.515201623 | 0.142036 | -3.62726  | 0.000286 | 0.000751 |
| 5297  | MAF1     | 2307.176329 | -0.515205924 | 0.111444 | -4.622989 | 3.78E-06 | 1.40E-05 |
| 9124  | C2orf7   | 350.7299082 | -0.515207826 | 0.173607 | -2.967672 | 0.003001 | 0.006446 |
| 5565  | COMMD5   | 519.1851763 | -0.515215668 | 0.114732 | -4.490582 | 7.10E-06 | 2.50E-05 |
| 8982  | CROCC    | 325.7603983 | -0.515233357 | 0.170598 | -3.02016  | 0.002526 | 0.005513 |
| 5439  | PSMA7    | 2540.066778 | -0.515526523 | 0.11335  | -4.548082 | 5.41E-06 | 1.95E-05 |
| 7516  | C13orf34 | 97.37786195 | -0.515638398 | 0.142836 | -3.61001  | 0.000306 | 0.000799 |
| 5954  | SSH3     | 663.8418965 | -0.515643488 | 0.120234 | -4.288653 | 1.80E-05 | 5.92E-05 |
| 7738  | CDK5RAP2 | 1856.17363  | -0.516066582 | 0.146468 | -3.523409 | 0.000426 | 0.001079 |
| 6745  | RPS4X    | 26003.68397 | -0.516126894 | 0.131591 | -3.92219  | 8.77E-05 | 0.000255 |
| 7308  | DCLRE1C  | 247.5242589 | -0.51620775  | 0.139603 | -3.697696 | 0.000218 | 0.000584 |
| 4739  | PARP12   | 912.6782024 | -0.51673941  | 0.105142 | -4.914676 | 8.89E-07 | 3.68E-06 |
| 7435  | DDB2     | 892.5100648 | -0.516795168 | 0.141881 | -3.642453 | 0.00027  | 0.000712 |
| 11217 | PCDHB9   | 148.2819598 | -0.517073918 | 0.233427 | -2.215144 | 0.02675  | 0.046744 |
| 15144 | FAM170B  | 0.517566727 | -0.517157868 | 0.537889 | -0.961458 | 0.336322 | 0.435304 |
| 12420 | HKDC1    | 976.1470172 | -0.517347955 | 0.282735 | -1.829799 | 0.06728  | 0.106171 |
| 13302 | TMEM155  | 31.06853099 | -0.517352486 | 0.335401 | -1.542488 | 0.122955 | 0.181179 |
| 6013  | ZNF444   | 385.8401265 | -0.517572203 | 0.121509 | -4.259522 | 2.05E-05 | 6.68E-05 |
| 12673 | DHH      | 6.31243936  | -0.517872077 | 0.296534 | -1.746418 | 0.080738 | 0.124876 |
| 11787 | TSNAXIP1 | 59.91996398 | -0.51793187  | 0.255529 | -2.026904 | 0.042672 | 0.070966 |
| 10882 | IRF8     | 482.1874635 | -0.518087091 | 0.222493 | -2.328558 | 0.019882 | 0.035813 |
| 2863  | MIF4GD   | 476.7118983 | -0.518100545 | 0.084478 | -6.132956 | 8.63E-10 | 5.91E-09 |

|       |          |             |              |          |           |          |          |
|-------|----------|-------------|--------------|----------|-----------|----------|----------|
| 6036  | PUF60    | 1946.772323 | -0.518148926 | 0.121907 | -4.250349 | 2.13E-05 | 6.93E-05 |
| 10133 | HSPA1B   | 1623.889621 | -0.518409149 | 0.199084 | -2.603975 | 0.009215 | 0.017825 |
| 6260  | BSCL2    | 1886.5665   | -0.518461271 | 0.124898 | -4.15108  | 3.31E-05 | 0.000104 |
| 8846  | KLF16    | 486.3790238 | -0.518704194 | 0.168765 | -3.073531 | 0.002115 | 0.004687 |
| 10443 | SNX10    | 2942.661803 | -0.518762618 | 0.207785 | -2.496635 | 0.012538 | 0.023533 |
| 9650  | SNHG1    | 597.2594456 | -0.518769823 | 0.18772  | -2.763532 | 0.005718 | 0.011615 |
| 8305  | CDC42EP1 | 1286.362352 | -0.518913999 | 0.157661 | -3.291323 | 0.000997 | 0.002353 |
| 12093 | FZp779M0 | 7.356544799 | -0.519656708 | 0.269118 | -1.930965 | 0.053487 | 0.086694 |
| 5252  | STX16    | 2115.749424 | -0.519723808 | 0.11176  | -4.650372 | 3.31E-06 | 1.24E-05 |
| 3228  | CANT1    | 1119.039533 | -0.520270322 | 0.088668 | -5.86759  | 4.42E-09 | 2.68E-08 |
| 14117 | TMOD4    | 1.158271333 | -0.520362196 | 0.405939 | -1.281872 | 0.199888 | 0.277537 |
| 8206  | TAS2R20  | 23.96866372 | -0.520365    | 0.156296 | -3.329362 | 0.00087  | 0.002079 |
| 7541  | SH3KBP1  | 1011.880617 | -0.520674555 | 0.14468  | -3.598792 | 0.00032  | 0.000831 |
| 6860  | PLD2     | 558.6472715 | -0.520702245 | 0.134294 | -3.877344 | 0.000106 | 0.000302 |
| 8079  | TXNRD1   | 2403.824443 | -0.521208301 | 0.154236 | -3.379291 | 0.000727 | 0.001763 |
| 13582 | LIME1    | 717.693965  | -0.521216006 | 0.356867 | -1.460533 | 0.144144 | 0.208022 |
| 7254  | RNF126   | 497.0474783 | -0.5212672   | 0.140002 | -3.723274 | 0.000197 | 0.000531 |
| 7919  | ZBTB12   | 61.86743662 | -0.521324579 | 0.151509 | -3.440874 | 0.00058  | 0.001435 |
| 6172  | IQCE     | 671.1963461 | -0.521339662 | 0.124458 | -4.188875 | 2.80E-05 | 8.90E-05 |
| 12814 | PKD1L3   | 1.396302728 | -0.52152774  | 0.306644 | -1.700758 | 0.088988 | 0.136121 |
| 3081  | NOP56    | 1462.571237 | -0.52168507  | 0.087293 | -5.976236 | 2.28E-09 | 1.45E-08 |
| 10926 | RARRES3  | 2365.626338 | -0.521692599 | 0.225753 | -2.310899 | 0.020838 | 0.037384 |
| 11317 | C21orf63 | 427.9952562 | -0.521855781 | 0.240045 | -2.17399  | 0.029706 | 0.05145  |
| 7750  | ZGPAT    | 619.7462145 | -0.522284434 | 0.148428 | -3.518761 | 0.000434 | 0.001096 |
| 12573 | GSTT2    | 100.0652456 | -0.5225711   | 0.293493 | -1.780526 | 0.07499  | 0.116908 |
| 6945  | BTBD2    | 1997.807455 | -0.523151083 | 0.135987 | -3.847054 | 0.00012  | 0.000337 |
| 4682  | PDCD2L   | 81.96584338 | -0.523297428 | 0.105931 | -4.93998  | 7.81E-07 | 3.27E-06 |
| 9034  | EBP      | 766.9772488 | -0.523312625 | 0.174382 | -3.000947 | 0.002691 | 0.00584  |
| 8518  | LMNA     | 6790.123992 | -0.523747426 | 0.163737 | -3.198719 | 0.00138  | 0.003176 |
| 10959 | EFCAB4B  | 45.72130728 | -0.523772861 | 0.227692 | -2.300359 | 0.021428 | 0.038322 |
| 4788  | RAB13    | 2510.264939 | -0.523817091 | 0.107069 | -4.892323 | 9.97E-07 | 4.08E-06 |
| 5393  | SQRDL    | 1922.22076  | -0.523845379 | 0.114641 | -4.569425 | 4.89E-06 | 1.78E-05 |
| 16818 | HAO1     | 0.789221713 | -0.524204862 | 1.077586 | -0.486462 | 0.626639 | 0.730334 |
| 6798  | POLR2F   | 634.9541201 | -0.524389089 | 0.134446 | -3.900379 | 9.60E-05 | 0.000277 |
| 5548  | TRIM28   | 3409.299635 | -0.52496777  | 0.116676 | -4.499362 | 6.82E-06 | 2.41E-05 |
| 7569  | F8A1     | 154.9959641 | -0.524973132 | 0.146248 | -3.589615 | 0.000331 | 0.000858 |
| 10996 | SLC7A1   | 1926.89318  | -0.525392623 | 0.229471 | -2.289578 | 0.022046 | 0.039298 |
| 15978 | CPA1     | 0.563519532 | -0.525446834 | 0.73168  | -0.718138 | 0.472672 | 0.57985  |
| 7917  | RANGRF   | 316.1685829 | -0.525581189 | 0.152713 | -3.441635 | 0.000578 | 0.001432 |
| 4721  | MED10    | 558.6442051 | -0.525859537 | 0.10686  | -4.921031 | 8.61E-07 | 3.57E-06 |
| 4525  | RPL4     | 24433.64725 | -0.526307153 | 0.104812 | -5.021459 | 5.13E-07 | 2.22E-06 |
| 7031  | C7orf43  | 264.2570064 | -0.526547911 | 0.138277 | -3.807934 | 0.00014  | 0.000391 |
| 12854 | CDSN     | 39.85924564 | -0.52669478  | 0.31163  | -1.690128 | 0.091003 | 0.138771 |
| 13793 | SLC45A2  | 11.88869984 | -0.526724084 | 0.379351 | -1.388487 | 0.164989 | 0.234463 |
| 9682  | GRASP    | 289.4722956 | -0.526827925 | 0.191394 | -2.75258  | 0.005913 | 0.01197  |
| 9068  | ANXA1    | 3865.539319 | -0.526859762 | 0.176133 | -2.991256 | 0.002778 | 0.006006 |
| 9172  | CHN1     | 209.1215019 | -0.526954236 | 0.178706 | -2.94872  | 0.003191 | 0.006819 |



|       |           |             |              |          |           |          |          |
|-------|-----------|-------------|--------------|----------|-----------|----------|----------|
| 3887  | MOGS      | 1350.353685 | -0.527170415 | 0.097449 | -5.40968  | 6.31E-08 | 3.18E-07 |
| 12734 | ALDH3B2   | 4.353958082 | -0.527659955 | 0.306394 | -1.722163 | 0.08504  | 0.130899 |
| 5745  | PARL      | 1133.094015 | -0.527878764 | 0.119962 | -4.400393 | 1.08E-05 | 3.69E-05 |
| 4809  | PLEKHM2   | 1580.714951 | -0.527962281 | 0.108101 | -4.883964 | 1.04E-06 | 4.24E-06 |
| 6578  | PRR3      | 252.1457594 | -0.529101079 | 0.132555 | -3.991548 | 6.56E-05 | 0.000196 |
| 8058  | DC1001347 | 16.83177894 | -0.52920244  | 0.156076 | -3.390681 | 0.000697 | 0.001696 |
| 11949 | CASC5     | 68.67519858 | -0.529221907 | 0.267936 | -1.975182 | 0.048247 | 0.079145 |
| 2984  | TMEM41A   | 742.2215975 | -0.529259551 | 0.087518 | -6.047419 | 1.47E-09 | 9.67E-09 |
| 5846  | USP5      | 1944.902618 | -0.529567473 | 0.121793 | -4.348092 | 1.37E-05 | 4.60E-05 |
| 7114  | CPSF1     | 1187.575039 | -0.52958917  | 0.140115 | -3.77967  | 0.000157 | 0.000433 |
| 10195 | MYCL1     | 71.85456112 | -0.52971419  | 0.205027 | -2.583626 | 0.009777 | 0.018797 |
| 7458  | FAM86A    | 320.8046804 | -0.530064409 | 0.145873 | -3.633738 | 0.000279 | 0.000734 |
| 8961  | MAP3K6    | 703.5746728 | -0.530366656 | 0.175245 | -3.02643  | 0.002475 | 0.005413 |
| 6076  | C6orf48   | 1748.193303 | -0.530757352 | 0.125456 | -4.230615 | 2.33E-05 | 7.52E-05 |
| 10271 | UNC5B     | 2105.414628 | -0.530859075 | 0.207613 | -2.556966 | 0.010559 | 0.020151 |
| 12204 | FFAR2     | 11.33944456 | -0.53122011  | 0.280311 | -1.895112 | 0.058078 | 0.093279 |
| 8147  | RPS29     | 4643.735741 | -0.531785477 | 0.158571 | -3.353616 | 0.000798 | 0.001919 |
| 14498 | ARG1      | 1.202683354 | -0.532002477 | 0.45535  | -1.168339 | 0.24267  | 0.328063 |
| 12032 | GPR34     | 410.6496388 | -0.532597414 | 0.27285  | -1.951977 | 0.050941 | 0.08298  |
| 13541 | C6orf227  | 3.858773607 | -0.532815525 | 0.361619 | -1.473418 | 0.140638 | 0.203578 |
| 4434  | EIF4A1    | 10203.0575  | -0.533145953 | 0.104911 | -5.081901 | 3.74E-07 | 1.65E-06 |
| 4214  | 43892     | 718.6779584 | -0.533209699 | 0.102501 | -5.202002 | 1.97E-07 | 9.17E-07 |
| 10904 | RASD2     | 328.995051  | -0.533266871 | 0.229924 | -2.319321 | 0.020378 | 0.036631 |
| 14302 | HIST2H3D  | 0.616772744 | -0.533300057 | 0.433828 | -1.229289 | 0.218964 | 0.300091 |
| 6654  | KCTD13    | 258.3554366 | -0.533300148 | 0.134642 | -3.960877 | 7.47E-05 | 0.00022  |
| 8006  | INTS1     | 2202.174241 | -0.533757269 | 0.156642 | -3.407504 | 0.000656 | 0.001605 |
| 5986  | IFNAR2    | 685.0951089 | -0.533878895 | 0.124865 | -4.275659 | 1.91E-05 | 6.24E-05 |
| 10098 | DC1001322 | 193.8565934 | -0.53390149  | 0.204036 | -2.616702 | 0.008878 | 0.017234 |
| 14792 | UGT1A4    | 2.989215924 | -0.534066222 | 0.498861 | -1.070572 | 0.284362 | 0.37681  |
| 7595  | PEX16     | 437.2033542 | -0.534261069 | 0.149172 | -3.581507 | 0.000342 | 0.000882 |
| 15447 | MYBPHL    | 0.454774334 | -0.53447949  | 0.61116  | -0.874533 | 0.381828 | 0.484446 |
| 3976  | RPN2      | 8142.117108 | -0.534603378 | 0.099829 | -5.355176 | 8.55E-08 | 4.21E-07 |
| 12223 | SCN5A     | 5.950319762 | -0.534836926 | 0.282896 | -1.890576 | 0.058681 | 0.094102 |
| 8338  | PRKAR1B   | 389.8625479 | -0.534897133 | 0.163193 | -3.277694 | 0.001047 | 0.00246  |
| 6407  | FLYWCH2   | 312.6853778 | -0.534982846 | 0.13132  | -4.073882 | 4.62E-05 | 0.000141 |
| 4457  | PDIA3     | 13110.01929 | -0.53543484  | 0.105733 | -5.06403  | 4.10E-07 | 1.81E-06 |
| 14272 | KCNJ9     | 1.363102517 | -0.535511982 | 0.433166 | -1.236274 | 0.216357 | 0.297142 |
| 10066 | C6orf150  | 68.22138046 | -0.535644852 | 0.203619 | -2.630619 | 0.008523 | 0.016596 |
| 10017 | HLA-L     | 74.97131863 | -0.535891919 | 0.202532 | -2.645965 | 0.008146 | 0.01594  |
| 2813  | CHMP4B    | 3287.506923 | -0.535904759 | 0.086764 | -6.176611 | 6.55E-10 | 4.56E-09 |
| 11524 | WISP1     | 205.2452475 | -0.536145754 | 0.254167 | -2.109423 | 0.034908 | 0.059375 |
| 3071  | BLOC1S3   | 325.5524612 | -0.536249808 | 0.089649 | -5.981682 | 2.21E-09 | 1.41E-08 |
| 10446 | NAALADL   | 51.47764791 | -0.536434716 | 0.21495  | -2.49563  | 0.012573 | 0.023593 |
| 13736 | PCDHA2    | 20.47426581 | -0.536462716 | 0.381708 | -1.405426 | 0.159895 | 0.228166 |
| 7403  | MLST8     | 916.4433676 | -0.536475162 | 0.146722 | -3.656397 | 0.000256 | 0.000677 |
| 8970  | ENGASE    | 441.6333605 | -0.536549677 | 0.17747  | -3.023325 | 0.0025   | 0.005463 |
| 6845  | NOP16     | 288.6202416 | -0.536691524 | 0.138265 | -3.881602 | 0.000104 | 0.000297 |

|       |          |             |              |          |           |          |          |
|-------|----------|-------------|--------------|----------|-----------|----------|----------|
| 11006 | PTPRC    | 1797.319032 | -0.536772302 | 0.234617 | -2.287866 | 0.022145 | 0.039439 |
| 8130  | RPL23P8  | 110.649454  | -0.536845198 | 0.159792 | -3.359649 | 0.00078  | 0.001882 |
| 4174  | DNAJB11  | 1428.523323 | -0.536981181 | 0.102596 | -5.233963 | 1.66E-07 | 7.79E-07 |
| 2513  | SNRPC    | 865.4753426 | -0.537025265 | 0.083244 | -6.451182 | 1.11E-10 | 8.66E-10 |
| 4939  | CAPNS1   | 8350.53809  | -0.537568259 | 0.111884 | -4.804704 | 1.55E-06 | 6.15E-06 |
| 5851  | ZNF213   | 364.2240735 | -0.537681912 | 0.123722 | -4.345898 | 1.39E-05 | 4.65E-05 |
| 5079  | ELF4     | 811.10093   | -0.537688709 | 0.113616 | -4.732516 | 2.22E-06 | 8.56E-06 |
| 1882  | ATG7     | 699.9546295 | -0.538111755 | 0.075734 | -7.105297 | 1.20E-12 | 1.25E-11 |
| 13489 | TMEM63C  | 26.01421571 | -0.538854745 | 0.361413 | -1.490967 | 0.13597  | 0.197579 |
| 4527  | PSMB1    | 2811.052622 | -0.538888213 | 0.107353 | -5.019766 | 5.17E-07 | 2.24E-06 |
| 10774 | SOX18    | 420.4077696 | -0.539047391 | 0.227049 | -2.37415  | 0.017589 | 0.032    |
| 7461  | CCDC101  | 296.5806457 | -0.539393447 | 0.148491 | -3.632508 | 0.000281 | 0.000737 |
| 16401 | PCDH15   | 0.597022438 | -0.539423755 | 0.898077 | -0.600643 | 0.548078 | 0.65499  |
| 14911 | C1orf105 | 0.744529116 | -0.539557318 | 0.52244  | -1.032763 | 0.301715 | 0.396587 |
| 8604  | MCM4     | 588.413637  | -0.539705841 | 0.170042 | -3.173965 | 0.001504 | 0.003426 |
| 11940 | PPIEL    | 101.1846227 | -0.539913541 | 0.27289  | -1.978504 | 0.047872 | 0.078588 |
| 9950  | HOMER3   | 852.4907052 | -0.54015525  | 0.202228 | -2.671021 | 0.007562 | 0.014895 |
| 7558  | ORAI1    | 365.2346006 | -0.540387107 | 0.15041  | -3.592757 | 0.000327 | 0.000849 |
| 10063 | TBXA2R   | 163.8117366 | -0.540747141 | 0.205482 | -2.631605 | 0.008498 | 0.016553 |
| 7860  | GRN      | 8537.796869 | -0.540851476 | 0.155977 | -3.467519 | 0.000525 | 0.00131  |
| 9868  | C19orf48 | 831.7653097 | -0.541148831 | 0.200583 | -2.697876 | 0.006978 | 0.013861 |
| 9448  | PFKFB3   | 4562.068236 | -0.541423812 | 0.190731 | -2.838672 | 0.00453  | 0.009398 |
| 6510  | SNX21    | 453.606851  | -0.541712841 | 0.134634 | -4.023602 | 5.73E-05 | 0.000173 |
| 12661 | DRD4     | 10.96190453 | -0.542348904 | 0.309337 | -1.75326  | 0.079557 | 0.123166 |
| 9641  | CCDC12   | 442.7207522 | -0.542559192 | 0.19615  | -2.766042 | 0.005674 | 0.011536 |
| 13530 | MKX      | 10.11858608 | -0.542575463 | 0.367428 | -1.476684 | 0.13976  | 0.202472 |
| 13543 | CGB7     | 2.120861059 | -0.542734983 | 0.368506 | -1.472798 | 0.140806 | 0.20379  |
| 3657  | TXNL4B   | 280.478027  | -0.54295437  | 0.097551 | -5.565878 | 2.61E-08 | 1.40E-07 |
| 3904  | RPL23AP8 | 128.4631678 | -0.542980154 | 0.100505 | -5.402502 | 6.57E-08 | 3.30E-07 |
| 13671 | SGCD     | 140.8692363 | -0.543248355 | 0.37948  | -1.43156  | 0.15227  | 0.218319 |
| 11663 | RDH5     | 404.7967784 | -0.543421527 | 0.263962 | -2.058714 | 0.039522 | 0.066417 |
| 5431  | ZBTB8OS  | 185.3281768 | -0.5436127   | 0.119413 | -4.552356 | 5.30E-06 | 1.91E-05 |
| 4592  | NSMCE1   | 1230.810241 | -0.543623704 | 0.108926 | -4.990747 | 6.01E-07 | 2.57E-06 |
| 10434 | GJD3     | 122.1752283 | -0.544359758 | 0.217806 | -2.499291 | 0.012444 | 0.023375 |
| 3683  | PPIA     | 5138.091842 | -0.544527686 | 0.098149 | -5.547965 | 2.89E-08 | 1.54E-07 |
| 7449  | EPB41    | 1594.751403 | -0.544951022 | 0.149814 | -3.637509 | 0.000275 | 0.000724 |
| 4760  | MRPL51   | 1651.60948  | -0.545391079 | 0.111206 | -4.90434  | 9.37E-07 | 3.86E-06 |
| 8309  | DPM2     | 840.7112863 | -0.545449562 | 0.165855 | -3.288718 | 0.001006 | 0.002374 |
| 7451  | WDR74    | 601.6009367 | -0.545452542 | 0.149983 | -3.636756 | 0.000276 | 0.000726 |
| 4348  | PSMC3    | 2299.25634  | -0.545677911 | 0.106326 | -5.132128 | 2.86E-07 | 1.29E-06 |
| 6642  | C8orf59  | 581.2755878 | -0.545744876 | 0.137582 | -3.966696 | 7.29E-05 | 0.000215 |
| 11890 | CRB1     | 7.980306539 | -0.545750702 | 0.274021 | -1.991639 | 0.046411 | 0.076509 |
| 7001  | THAP8    | 140.6558787 | -0.54596686  | 0.142786 | -3.823683 | 0.000131 | 0.000368 |
| 6639  | TPRA1    | 665.1904614 | -0.546209303 | 0.137656 | -3.967931 | 7.25E-05 | 0.000214 |
| 2797  | ACOT9    | 518.3931345 | -0.546317877 | 0.088214 | -6.193098 | 5.90E-10 | 4.13E-09 |
| 12730 | FLJ45445 | 21.97858843 | -0.546440271 | 0.317092 | -1.723288 | 0.084836 | 0.130631 |
| 9753  | ACSL5    | 793.8293652 | -0.54644042  | 0.200034 | -2.731736 | 0.0063   | 0.012662 |

|       |           |             |              |          |           |          |          |
|-------|-----------|-------------|--------------|----------|-----------|----------|----------|
| 12171 | NAGS      | 107.2642611 | -0.546550983 | 0.286757 | -1.905974 | 0.056654 | 0.091239 |
| 2201  | UBE2I     | 1694.528839 | -0.546684014 | 0.080925 | -6.75543  | 1.42E-11 | 1.27E-10 |
| 8896  | CARD10    | 911.6844757 | -0.547047987 | 0.179129 | -3.053933 | 0.002259 | 0.004977 |
| 5620  | ARHGDI    | 6000.485494 | -0.547117681 | 0.122618 | -4.461978 | 8.12E-06 | 2.83E-05 |
| 14665 | VCX3A     | 1.412574163 | -0.547235685 | 0.492429 | -1.111299 | 0.26644  | 0.356119 |
| 6298  | ITFG3     | 2335.242247 | -0.547297369 | 0.132577 | -4.128161 | 3.66E-05 | 0.000114 |
| 7477  | ANKZF1    | 835.8562013 | -0.547528177 | 0.151109 | -3.623862 | 0.00029  | 0.000761 |
| 8199  | FAM89A    | 156.1082764 | -0.54795629  | 0.164391 | -3.33324  | 0.000858 | 0.002052 |
| 12969 | LOC401387 | 1.280909125 | -0.548132317 | 0.331659 | -1.6527   | 0.098392 | 0.148707 |
| 4580  | DHX37     | 504.8074995 | -0.548405153 | 0.109761 | -4.996338 | 5.84E-07 | 2.50E-06 |
| 11516 | RPL21     | 6.580402774 | -0.548421243 | 0.259821 | -2.110769 | 0.034792 | 0.059213 |
| 16398 | CXCL17    | 0.397688087 | -0.548447329 | 0.911841 | -0.601472 | 0.547525 | 0.654441 |
| 3948  | C11orf73  | 382.0312171 | -0.54872928  | 0.102053 | -5.376914 | 7.58E-08 | 3.76E-07 |
| 11508 | GSTP1     | 6457.117949 | -0.548734785 | 0.259645 | -2.113404 | 0.034566 | 0.058875 |
| 13560 | CCDC154   | 9.165085969 | -0.548802194 | 0.374073 | -1.467098 | 0.14235  | 0.205766 |
| 9108  | WASH5P    | 224.2728046 | -0.548941595 | 0.184516 | -2.975027 | 0.00293  | 0.006305 |
| 9823  | DPP7      | 2799.283914 | -0.549065114 | 0.202571 | -2.71048  | 0.006719 | 0.013406 |
| 13829 | PRDM12    | 1.316908061 | -0.549073512 | 0.399216 | -1.375381 | 0.169013 | 0.239557 |
| 7025  | ATIC      | 1571.804604 | -0.549163513 | 0.144063 | -3.811965 | 0.000138 | 0.000385 |
| 5632  | RPS25     | 9642.261718 | -0.549341403 | 0.12334  | -4.453887 | 8.43E-06 | 2.93E-05 |
| 9239  | KAT2A     | 864.5173238 | -0.549749366 | 0.188077 | -2.923004 | 0.003467 | 0.007355 |
| 6185  | PDIA6     | 8337.47724  | -0.549785155 | 0.131445 | -4.182637 | 2.88E-05 | 9.13E-05 |
| 12639 | LOC647946 | 8.172614195 | -0.549941639 | 0.312256 | -1.761189 | 0.078206 | 0.121285 |
| 4754  | SLC10A3   | 745.799349  | -0.550305714 | 0.112147 | -4.90699  | 9.25E-07 | 3.81E-06 |
| 12640 | ALDH1L2   | 257.270907  | -0.55056253  | 0.312808 | -1.760066 | 0.078397 | 0.121571 |
| 7145  | PREX1     | 1721.912154 | -0.550573011 | 0.146217 | -3.765461 | 0.000166 | 0.000456 |
| 8084  | STARD5    | 68.60945671 | -0.550784798 | 0.163066 | -3.377679 | 0.000731 | 0.001772 |
| 15438 | LOC150568 | 1.27973427  | -0.551136509 | 0.628595 | -0.876775 | 0.380609 | 0.483244 |
| 8999  | DAAM2     | 860.3951443 | -0.551139338 | 0.182948 | -3.012551 | 0.002591 | 0.005643 |
| 12360 | GRM2      | 7.791276724 | -0.551616463 | 0.29858  | -1.847465 | 0.06468  | 0.102572 |
| 8493  | TNK2      | 756.5231972 | -0.551620702 | 0.17184  | -3.210084 | 0.001327 | 0.003062 |
| 10497 | ADM       | 5018.768512 | -0.551694021 | 0.223167 | -2.472116 | 0.013432 | 0.025081 |
| 12256 | TMEM90A   | 9.36251924  | -0.551731479 | 0.293342 | -1.880848 | 0.059993 | 0.095938 |
| 8996  | MCAM      | 7681.850023 | -0.551812406 | 0.183109 | -3.013576 | 0.002582 | 0.005626 |
| 4901  | USF1      | 819.5326325 | -0.551818572 | 0.114344 | -4.825954 | 1.39E-06 | 5.57E-06 |
| 5735  | ALKBH4    | 286.0080252 | -0.552180678 | 0.125348 | -4.405195 | 1.06E-05 | 3.61E-05 |
| 7166  | MPZ       | 41.2727336  | -0.552445828 | 0.147038 | -3.757162 | 0.000172 | 0.00047  |
| 6759  | FAM96B    | 1113.173771 | -0.552633549 | 0.141119 | -3.916093 | 9.00E-05 | 0.000261 |
| 6762  | HSCB      | 265.4023992 | -0.552652759 | 0.141181 | -3.914504 | 9.06E-05 | 0.000263 |
| 6130  | HMG20B    | 1184.817599 | -0.552711061 | 0.131364 | -4.207474 | 2.58E-05 | 8.26E-05 |
| 7845  | RHBDD2    | 2176.298738 | -0.552780289 | 0.159048 | -3.475547 | 0.00051  | 0.001274 |
| 6281  | ZMAT5     | 336.0009964 | -0.552820534 | 0.133545 | -4.139589 | 3.48E-05 | 0.000109 |
| 9652  | STK17B    | 949.2319944 | -0.552831555 | 0.200059 | -2.763336 | 0.005721 | 0.011619 |
| 6937  | HRAS      | 569.1884952 | -0.552875388 | 0.14365  | -3.848769 | 0.000119 | 0.000335 |
| 8004  | OAF       | 1903.408038 | -0.552925233 | 0.162215 | -3.408587 | 0.000653 | 0.001599 |
| 11447 | SLFNL1    | 16.01457244 | -0.552946157 | 0.258939 | -2.13543  | 0.032726 | 0.056037 |
| 14801 | CYP24A1   | 143.2694541 | -0.552946413 | 0.519118 | -1.065164 | 0.286802 | 0.379812 |

|       |           |             |              |          |           |          |          |
|-------|-----------|-------------|--------------|----------|-----------|----------|----------|
| 2978  | IFT20     | 331.5583716 | -0.552973959 | 0.091392 | -6.050595 | 1.44E-09 | 9.50E-09 |
| 5850  | DKN2AIPN  | 446.3020821 | -0.553291264 | 0.12728  | -4.347047 | 1.38E-05 | 4.62E-05 |
| 6957  | ELL3      | 103.7691691 | -0.553682822 | 0.144081 | -3.842847 | 0.000122 | 0.000343 |
| 6669  | LSM4      | 1211.995695 | -0.553785046 | 0.140042 | -3.954413 | 7.67E-05 | 0.000225 |
| 2914  | ZNF282    | 608.1415133 | -0.553866677 | 0.090787 | -6.100732 | 1.06E-09 | 7.10E-09 |
| 13955 | DPCR1     | 4.820223415 | -0.553902365 | 0.415602 | -1.33277  | 0.182607 | 0.256454 |
| 15542 | MYADML2   | 0.651335027 | -0.554104025 | 0.653027 | -0.848516 | 0.396151 | 0.499633 |
| 5057  | FAM127B   | 1049.377359 | -0.55428767  | 0.116852 | -4.743506 | 2.10E-06 | 8.14E-06 |
| 10742 | CD69      | 185.7294265 | -0.554372879 | 0.232609 | -2.383284 | 0.017159 | 0.03131  |
| 10181 | TYRO3     | 212.8300213 | -0.554530302 | 0.214162 | -2.589297 | 0.009617 | 0.018516 |
| 10351 | CCDC57    | 380.8561898 | -0.554547593 | 0.219358 | -2.528046 | 0.01147  | 0.02172  |
| 7433  | SYDE1     | 813.3964185 | -0.554718603 | 0.15223  | -3.64394  | 0.000268 | 0.000708 |
| 11608 | HLA-DQB2  | 216.8383725 | -0.554912739 | 0.266915 | -2.078984 | 0.037619 | 0.063522 |
| 12164 | EFCAB1    | 3.040287103 | -0.554924033 | 0.2909   | -1.907612 | 0.056441 | 0.090953 |
| 14562 | AKR1CL1   | 1.328384659 | -0.554945138 | 0.483526 | -1.147705 | 0.25109  | 0.337977 |
| 7628  | POLR2L    | 1333.184886 | -0.555010807 | 0.155542 | -3.568243 | 0.000359 | 0.000923 |
| 4318  | C2CD2L    | 256.9368535 | -0.555026642 | 0.107841 | -5.14671  | 2.65E-07 | 1.20E-06 |
| 11055 | EGFLAM    | 362.5126348 | -0.555086865 | 0.244242 | -2.272695 | 0.023045 | 0.040859 |
| 11331 | TSPAN32   | 24.54969301 | -0.556003502 | 0.256157 | -2.170558 | 0.029965 | 0.051834 |
| 9391  | NES       | 2267.288471 | -0.556091429 | 0.194307 | -2.861924 | 0.004211 | 0.008789 |
| 15172 | CDH22     | 22.02164665 | -0.556542143 | 0.582401 | -0.9556   | 0.339274 | 0.438299 |
| 8087  | ALKBH6    | 112.7752487 | -0.556790804 | 0.164938 | -3.37575  | 0.000736 | 0.001784 |
| 5172  | DDX54     | 1512.746022 | -0.556956045 | 0.118777 | -4.689074 | 2.74E-06 | 1.04E-05 |
| 14344 | HCG9      | 0.719462652 | -0.556988555 | 0.458007 | -1.216114 | 0.223942 | 0.306015 |
| 1742  | PPM1G     | 2157.996727 | -0.557038119 | 0.076811 | -7.252037 | 4.11E-13 | 4.62E-12 |
| 11321 | IL24      | 2.912418044 | -0.557180397 | 0.256409 | -2.173017 | 0.029779 | 0.051559 |
| 10444 | SOX15     | 9.438057434 | -0.557470964 | 0.223309 | -2.496415 | 0.012546 | 0.023545 |
| 13366 | DLX2      | 3.962534977 | -0.557482939 | 0.366321 | -1.521844 | 0.128048 | 0.18778  |
| 10184 | CEBPD     | 2835.069346 | -0.557584528 | 0.215521 | -2.587153 | 0.009677 | 0.018624 |
| 8918  | NUSAP1    | 424.8626916 | -0.557855005 | 0.183237 | -3.044438 | 0.002331 | 0.005124 |
| 11914 | AQP3      | 2845.57986  | -0.558259086 | 0.281425 | -1.983685 | 0.047291 | 0.077803 |
| 8517  | HYI       | 606.1448428 | -0.55832022  | 0.174535 | -3.198905 | 0.00138  | 0.003175 |
| 9047  | TIAM1     | 221.7966312 | -0.558420503 | 0.186349 | -2.996634 | 0.00273  | 0.005914 |
| 9541  | HESX1     | 12.9739501  | -0.558607751 | 0.199305 | -2.80278  | 0.005066 | 0.010408 |
| 9876  | SEMA6B    | 691.0128939 | -0.558753043 | 0.207285 | -2.695573 | 0.007027 | 0.013946 |
| 8489  | HSFX2     | 29.52256171 | -0.55878759  | 0.173982 | -3.211754 | 0.001319 | 0.003046 |
| 14623 | DC1001923 | 1.615057522 | -0.559154113 | 0.496838 | -1.125426 | 0.260409 | 0.349058 |
| 8336  | ANKS3     | 461.1173856 | -0.559389423 | 0.17065  | -3.277988 | 0.001046 | 0.002458 |
| 6355  | DGAT1     | 642.9720382 | -0.559922375 | 0.136595 | -4.099133 | 4.15E-05 | 0.000128 |
| 10918 | DC1001322 | 235.7222398 | -0.559960274 | 0.242087 | -2.313049 | 0.02072  | 0.037198 |
| 7039  | DBF4B     | 90.56746951 | -0.559988752 | 0.147209 | -3.804028 | 0.000142 | 0.000396 |
| 10018 | HOXA1     | 38.1927179  | -0.559989595 | 0.211655 | -2.645767 | 0.008151 | 0.015947 |
| 5429  | MFS5      | 865.3006806 | -0.560040659 | 0.123007 | -4.55291  | 5.29E-06 | 1.91E-05 |
| 8330  | VASH1     | 1253.392386 | -0.560351301 | 0.170813 | -3.280493 | 0.001036 | 0.002438 |
| 7519  | RBM38     | 431.7270524 | -0.560716319 | 0.155394 | -3.60836  | 0.000308 | 0.000803 |
| 4017  | HAUS5     | 292.0553411 | -0.560743776 | 0.105224 | -5.329048 | 9.87E-08 | 4.82E-07 |
| 3303  | PTP4A2    | 2151.094072 | -0.560779954 | 0.09647  | -5.812975 | 6.14E-09 | 3.64E-08 |

|       |           |             |              |          |           |          |          |
|-------|-----------|-------------|--------------|----------|-----------|----------|----------|
| 13681 | RBM46     | 8.954116296 | -0.560984697 | 0.393067 | -1.427198 | 0.153523 | 0.219955 |
| 8160  | GIPC1     | 1409.703058 | -0.561308981 | 0.16766  | -3.347901 | 0.000814 | 0.001956 |
| 6463  | ZFPL1     | 524.2787567 | -0.561439528 | 0.138835 | -4.043919 | 5.26E-05 | 0.000159 |
| 13421 | RPL23AP3  | 3.749591844 | -0.561485952 | 0.372432 | -1.50762  | 0.131652 | 0.192274 |
| 6848  | POP5      | 347.1950154 | -0.561562155 | 0.144734 | -3.87997  | 0.000104 | 0.000299 |
| 11712 | LOC72898  | 4.31161449  | -0.561717321 | 0.274109 | -2.049247 | 0.040438 | 0.067676 |
| 4406  | TOR3A     | 907.1617164 | -0.562262125 | 0.110282 | -5.098388 | 3.43E-07 | 1.52E-06 |
| 15269 | IL26      | 0.436782064 | -0.562343408 | 0.605684 | -0.928444 | 0.353177 | 0.453378 |
| 8074  | NR2F6     | 752.4678496 | -0.563455076 | 0.166549 | -3.383119 | 0.000717 | 0.00174  |
| 8831  | DEGS1     | 4059.656612 | -0.563660736 | 0.183122 | -3.078069 | 0.002083 | 0.004624 |
| 5495  | HMOX2     | 1181.600227 | -0.563806901 | 0.124613 | -4.524471 | 6.05E-06 | 2.16E-05 |
| 7367  | WDR18     | 588.9343964 | -0.564034938 | 0.153645 | -3.671026 | 0.000242 | 0.000643 |
| 11769 | C15orf54  | 4.065877728 | -0.564298433 | 0.278016 | -2.029733 | 0.042384 | 0.070589 |
| 5406  | C11orf49  | 570.9904872 | -0.564727552 | 0.1238   | -4.561594 | 5.08E-06 | 1.84E-05 |
| 10448 | DTX4      | 731.9540763 | -0.565384741 | 0.226599 | -2.495085 | 0.012593 | 0.023625 |
| 10608 | ZCCHC18   | 11.24860566 | -0.565410408 | 0.232309 | -2.433877 | 0.014938 | 0.027602 |
| 11859 | LRRC24    | 16.52408726 | -0.565475441 | 0.282347 | -2.002768 | 0.045202 | 0.074707 |
| 8610  | FAH       | 1563.543582 | -0.565518653 | 0.178373 | -3.170423 | 0.001522 | 0.003465 |
| 5237  | SUV39H1   | 209.1680633 | -0.565719961 | 0.121463 | -4.657557 | 3.20E-06 | 1.20E-05 |
| 10202 | C3orf47   | 25.43028007 | -0.566048627 | 0.219282 | -2.581377 | 0.009841 | 0.018907 |
| 5832  | GRINA     | 6260.360248 | -0.566590489 | 0.130085 | -4.355548 | 1.33E-05 | 4.46E-05 |
| 9104  | XYLT1     | 217.7579542 | -0.566685431 | 0.190441 | -2.975649 | 0.002924 | 0.006295 |
| 11976 | C6orf174  | 266.3055871 | -0.566957587 | 0.288343 | -1.966261 | 0.049268 | 0.080637 |
| 10681 | ZNF300    | 121.9597985 | -0.567017825 | 0.236036 | -2.402249 | 0.016295 | 0.029903 |
| 9549  | SPN       | 300.9573734 | -0.5672585   | 0.202466 | -2.801751 | 0.005083 | 0.010433 |
| 13764 | NEGR1     | 196.9850927 | -0.567339339 | 0.405926 | -1.397641 | 0.162221 | 0.231015 |
| 3711  | C2orf28   | 2742.938289 | -0.567605446 | 0.102614 | -5.531468 | 3.18E-08 | 1.68E-07 |
| 10520 | PTGDR     | 28.53022714 | -0.567756812 | 0.230429 | -2.463908 | 0.013743 | 0.025606 |
| 11020 | LILRA1    | 24.02091309 | -0.567778218 | 0.248575 | -2.284135 | 0.022364 | 0.039778 |
| 8947  | GPR124    | 1664.887307 | -0.568063228 | 0.187253 | -3.033665 | 0.002416 | 0.005292 |
| 14555 | LPPR3     | 0.715642562 | -0.568096766 | 0.494008 | -1.149974 | 0.250154 | 0.336879 |
| 6110  | HDFGRP2   | 907.4147249 | -0.568106584 | 0.134743 | -4.216235 | 2.48E-05 | 7.97E-05 |
| 5610  | NCOR2     | 4254.40522  | -0.568190891 | 0.127184 | -4.467483 | 7.91E-06 | 2.77E-05 |
| 8157  | LOC388152 | 222.6073788 | -0.568256057 | 0.169708 | -3.34843  | 0.000813 | 0.001953 |
| 11910 | FAM46C    | 503.5418028 | -0.568582436 | 0.286478 | -1.984732 | 0.047174 | 0.077636 |
| 10186 | CRNA0008  | 67.5291061  | -0.568774866 | 0.219883 | -2.586714 | 0.00969  | 0.018646 |
| 7826  | FTHL3     | 306.2769883 | -0.568961115 | 0.162943 | -3.491785 | 0.00048  | 0.001202 |
| 4723  | TADA3     | 1488.47617  | -0.569010913 | 0.115636 | -4.920715 | 8.62E-07 | 3.58E-06 |
| 7740  | GNAS      | 28657.60161 | -0.56906827  | 0.161517 | -3.523266 | 0.000426 | 0.001079 |
| 10991 | C3orf14   | 123.37978   | -0.569526924 | 0.248709 | -2.289929 | 0.022025 | 0.039269 |
| 7545  | C17orf58  | 276.8337469 | -0.569638925 | 0.158326 | -3.597895 | 0.000321 | 0.000833 |
| 7533  | NUBP2     | 808.9642057 | -0.569714161 | 0.158146 | -3.602453 | 0.000315 | 0.00082  |
| 15552 | TP53TG5   | 0.320939511 | -0.569987911 | 0.673829 | -0.845894 | 0.397612 | 0.501131 |
| 15902 | SNORA31   | 0.303991369 | -0.570030152 | 0.768305 | -0.741932 | 0.458128 | 0.564719 |
| 15897 | LOC285205 | 0.24689311  | -0.570030203 | 0.766522 | -0.743658 | 0.457083 | 0.563584 |
| 16561 | LOC150525 | 0.291131579 | -0.570030243 | 1.024693 | -0.556293 | 0.57801  | 0.684112 |
| 16664 | ATP4A     | 0.252305042 | -0.570030289 | 1.074881 | -0.53032  | 0.59589  | 0.700915 |

|       |           |             |              |          |           |          |          |
|-------|-----------|-------------|--------------|----------|-----------|----------|----------|
| 17158 | OLFM3     | 0.243228006 | -0.570030429 | 1.437561 | -0.396526 | 0.691717 | 0.790196 |
| 16884 | FOLR4     | 0.1683441   | -0.57003051  | 1.216211 | -0.468694 | 0.639289 | 0.742122 |
| 16891 | C17orf98  | 0.163195523 | -0.570030512 | 1.21944  | -0.467453 | 0.640176 | 0.742886 |
| 17039 | CACNG3    | 0.180070398 | -0.570030531 | 1.322366 | -0.431069 | 0.666419 | 0.766622 |
| 17304 | C6orf58   | 0.163629735 | -0.570030765 | 1.559077 | -0.365621 | 0.714648 | 0.809445 |
| 17313 | LY6G6F    | 0.163382596 | -0.57003077  | 1.565785 | -0.364054 | 0.715818 | 0.810428 |
| 17568 | NKX2-1    | 0.127344129 | -0.570031294 | 1.903867 | -0.299407 | 0.764629 | 0.853233 |
| 17594 | HOXD12    | 0.105876606 | -0.570031439 | 1.933765 | -0.294778 | 0.768163 | 0.855826 |
| 17593 | DGAT2L6   | 0.107047864 | -0.57003144  | 1.934377 | -0.294685 | 0.768235 | 0.855826 |
| 17676 | TECRL     | 0.153586822 | -0.570031523 | 2.080494 | -0.273989 | 0.784093 | 0.869485 |
| 17702 | NKX6-3    | 0.124917088 | -0.570031599 | 2.135562 | -0.266923 | 0.789528 | 0.874225 |
| 17717 | WFDC11    | 0.104003639 | -0.570031779 | 2.16732  | -0.263012 | 0.792541 | 0.876819 |
| 17811 | TMEM114   | 0.154872397 | -0.570031891 | 2.335766 | -0.244045 | 0.807196 | 0.888319 |
| 17825 | FLJ36000  | 0.138688103 | -0.570031943 | 2.370024 | -0.240517 | 0.809929 | 0.890617 |
| 18051 | IAPP      | 0.122299339 | -0.57003288  | 2.91407  | -0.195614 | 0.844912 | 0.917412 |
| 18011 | MAGEA11   | 0.107912093 | -0.570032897 | 2.801499 | -0.203474 | 0.838764 | 0.912703 |
| 18023 | OR52K2    | 0.103060934 | -0.570032948 | 2.827042 | -0.201636 | 0.840201 | 0.913765 |
| 18050 | GAGE4     | 0.106374994 | -0.570033125 | 2.91407  | -0.195614 | 0.844912 | 0.917412 |
| 18052 | OR1D4     | 0.147444556 | -0.570033125 | 2.91407  | -0.195614 | 0.844912 | 0.917412 |
| 5760  | TTL12     | 738.8119918 | -0.570182999 | 0.129818 | -4.392175 | 1.12E-05 | 3.82E-05 |
| 12179 | EGR3      | 214.355447  | -0.570331188 | 0.299682 | -1.903118 | 0.057025 | 0.091777 |
| 11863 | SH2D1A    | 108.7328539 | -0.570718117 | 0.285032 | -2.002294 | 0.045253 | 0.074771 |
| 3579  | HNRNPAB   | 2557.367659 | -0.570947741 | 0.101637 | -5.617511 | 1.94E-08 | 1.06E-07 |
| 8503  | PPP1R16A  | 977.6627587 | -0.571636955 | 0.178391 | -3.204408 | 0.001353 | 0.00312  |
| 13172 | DC1001336 | 20.50051955 | -0.571768518 | 0.359876 | -1.588791 | 0.112108 | 0.166825 |
| 6951  | MRPL14    | 631.8598375 | -0.571909363 | 0.14874  | -3.845037 | 0.000121 | 0.00034  |
| 7117  | PIK3CD    | 595.7024108 | -0.572046947 | 0.151399 | -3.778412 | 0.000158 | 0.000435 |
| 11007 | SHC2      | 421.3321652 | -0.572505475 | 0.250281 | -2.287448 | 0.02217  | 0.039479 |
| 4211  | ARPC1A    | 3177.056461 | -0.572606115 | 0.110059 | -5.20274  | 1.96E-07 | 9.14E-07 |
| 7133  | CD40      | 989.0796552 | -0.573122049 | 0.151934 | -3.772167 | 0.000162 | 0.000445 |
| 8282  | C17orf61  | 607.0609583 | -0.573297866 | 0.173725 | -3.300038 | 0.000967 | 0.002288 |
| 5962  | SRA1      | 775.5725623 | -0.573386683 | 0.133786 | -4.285865 | 1.82E-05 | 5.98E-05 |
| 4202  | CHAF1A    | 221.9896678 | -0.573524333 | 0.11016  | -5.206269 | 1.93E-07 | 8.99E-07 |
| 2706  | DLGAP4    | 2076.777856 | -0.57381623  | 0.091455 | -6.27428  | 3.51E-10 | 2.54E-09 |
| 5900  | HYOU1     | 4246.841947 | -0.573846178 | 0.1328   | -4.321146 | 1.55E-05 | 5.16E-05 |
| 12395 | ITIH5     | 3654.864449 | -0.57493363  | 0.312936 | -1.837222 | 0.066177 | 0.10465  |
| 6045  | SLC15A4   | 1894.684153 | -0.574976359 | 0.135385 | -4.246965 | 2.17E-05 | 7.03E-05 |
| 4216  | AUP1      | 2350.344344 | -0.575214082 | 0.110606 | -5.200573 | 1.99E-07 | 9.24E-07 |
| 11839 | ALDOC     | 1660.731404 | -0.575338124 | 0.286413 | -2.008769 | 0.044562 | 0.073777 |
| 3331  | C1orf123  | 769.9612897 | -0.575569139 | 0.099304 | -5.796028 | 6.79E-09 | 4.00E-08 |
| 12010 | PYHIN1    | 78.08560347 | -0.57565287  | 0.293957 | -1.958286 | 0.050196 | 0.081923 |
| 6636  | GARS      | 2449.364925 | -0.575718568 | 0.145023 | -3.969844 | 7.19E-05 | 0.000212 |
| 10985 | TMEM121   | 32.02810421 | -0.575878149 | 0.251263 | -2.291937 | 0.021909 | 0.039094 |
| 9659  | LZTS1     | 830.8675438 | -0.575940594 | 0.208551 | -2.761635 | 0.005751 | 0.01167  |
| 5748  | NUDC      | 1931.07896  | -0.575957123 | 0.130958 | -4.398027 | 1.09E-05 | 3.73E-05 |
| 4843  | KIAA2013  | 1454.150023 | -0.575975361 | 0.11828  | -4.869589 | 1.12E-06 | 4.53E-06 |
| 2713  | APEX2     | 509.061241  | -0.576225658 | 0.091937 | -6.267602 | 3.67E-10 | 2.65E-09 |

|       |           |             |              |          |           |          |          |
|-------|-----------|-------------|--------------|----------|-----------|----------|----------|
| 10050 | CRIP2     | 3133.496502 | -0.576245462 | 0.218668 | -2.635253 | 0.008407 | 0.016397 |
| 6128  | UBXN1     | 1811.428776 | -0.576279654 | 0.136945 | -4.208112 | 2.58E-05 | 8.24E-05 |
| 13817 | TDH       | 0.795818967 | -0.576370424 | 0.417618 | -1.380139 | 0.167544 | 0.23768  |
| 12709 | KMO       | 1205.520847 | -0.57684457  | 0.333548 | -1.72942  | 0.083734 | 0.129142 |
| 8391  | POMZP3    | 188.2515922 | -0.576896118 | 0.17732  | -3.25341  | 0.00114  | 0.002664 |
| 15191 | LGALS7    | 0.383230468 | -0.577179471 | 0.606895 | -0.951036 | 0.341586 | 0.44075  |
| 13602 | TFAP2A    | 109.7744558 | -0.577588076 | 0.396863 | -1.455386 | 0.145562 | 0.20973  |
| 4443  | SUMF2     | 3766.031467 | -0.577767072 | 0.113802 | -5.076957 | 3.84E-07 | 1.69E-06 |
| 7011  | DC1002707 | 29.75118466 | -0.577878775 | 0.151333 | -3.818598 | 0.000134 | 0.000375 |
| 1354  | ARPC2     | 4442.299217 | -0.578077672 | 0.07423  | -7.787661 | 6.83E-15 | 9.88E-14 |
| 8115  | IRF5      | 533.9490127 | -0.578105238 | 0.171872 | -3.363576 | 0.000769 | 0.001858 |
| 6230  | TELO2     | 537.2170446 | -0.57816105  | 0.138848 | -4.163978 | 3.13E-05 | 9.84E-05 |
| 8714  | ACAP3     | 570.7081071 | -0.578190031 | 0.185015 | -3.125104 | 0.001777 | 0.003998 |
| 11643 | DCLK1     | 601.9891196 | -0.578557202 | 0.280445 | -2.062997 | 0.039113 | 0.065847 |
| 14945 | FUT5      | 0.726366397 | -0.579467343 | 0.566139 | -1.023542 | 0.306051 | 0.401399 |
| 5681  | C17orf101 | 360.0908044 | -0.579542132 | 0.130784 | -4.431294 | 9.37E-06 | 3.23E-05 |
| 3753  | ST3GAL2   | 842.0115085 | -0.579651449 | 0.105301 | -5.504733 | 3.70E-08 | 1.93E-07 |
| 6858  | GPR137    | 634.355861  | -0.580216533 | 0.149609 | -3.878218 | 0.000105 | 0.000301 |
| 12836 | SEC14L4   | 20.23729034 | -0.580471635 | 0.342745 | -1.693595 | 0.090342 | 0.137959 |
| 2315  | DYNLL1    | 3714.770275 | -0.580512068 | 0.087399 | -6.642093 | 3.09E-11 | 2.62E-10 |
| 5992  | RXRA      | 2114.095857 | -0.580712848 | 0.135899 | -4.273131 | 1.93E-05 | 6.31E-05 |
| 15213 | GDF1      | 2.214746207 | -0.580742272 | 0.614986 | -0.944317 | 0.345007 | 0.444521 |
| 11579 | ADRA2C    | 100.1716997 | -0.580937518 | 0.278048 | -2.089344 | 0.036677 | 0.062087 |
| 13490 | NOX1      | 1.01051872  | -0.581013626 | 0.389749 | -1.490737 | 0.136031 | 0.197653 |
| 14863 | RFPL1     | 0.829553468 | -0.58133786  | 0.554347 | -1.048689 | 0.294321 | 0.388145 |
| 5333  | THOC3     | 604.5932096 | -0.581416876 | 0.12623  | -4.605997 | 4.10E-06 | 1.51E-05 |
| 10167 | HSD17B7P  | 48.4289488  | -0.581659158 | 0.224272 | -2.593546 | 0.009499 | 0.018314 |
| 9323  | DC1002887 | 458.6308375 | -0.581750709 | 0.201216 | -2.89118  | 0.003838 | 0.008069 |
| 7682  | HOXC6     | 272.1343578 | -0.581763509 | 0.164047 | -3.546321 | 0.000391 | 0.000997 |
| 5549  | TAPBP     | 8172.53805  | -0.581865808 | 0.129326 | -4.499216 | 6.82E-06 | 2.41E-05 |
| 9737  | SDHAP3    | 443.8597033 | -0.581964944 | 0.212595 | -2.73743  | 0.006192 | 0.012465 |
| 5961  | RAD9B     | 27.14657491 | -0.582140807 | 0.135827 | -4.285902 | 1.82E-05 | 5.98E-05 |
| 9989  | DUSP1     | 19627.54351 | -0.582227165 | 0.219194 | -2.656224 | 0.007902 | 0.015506 |
| 11216 | DC1001331 | 21.45684448 | -0.58230424  | 0.262839 | -2.215444 | 0.02673  | 0.046716 |
| 9865  | HEYL      | 1720.262607 | -0.582375545 | 0.215819 | -2.698441 | 0.006967 | 0.013842 |
| 9442  | FANCB     | 10.75233213 | -0.582765893 | 0.205148 | -2.840708 | 0.004501 | 0.009345 |
| 17265 | FAM27B    | 1.174600972 | -0.58288854  | 1.55708  | -0.374347 | 0.708146 | 0.803799 |
| 5288  | PPP1CA    | 3302.346011 | -0.58296507  | 0.125938 | -4.628975 | 3.67E-06 | 1.36E-05 |
| 8420  | FNDC8     | 7.038651922 | -0.583014166 | 0.179781 | -3.242921 | 0.001183 | 0.002754 |
| 11683 | ANKRD55   | 5.083136914 | -0.583375913 | 0.283853 | -2.055206 | 0.039859 | 0.066873 |
| 6581  | C8orf58   | 286.3580849 | -0.583435029 | 0.146193 | -3.990864 | 6.58E-05 | 0.000196 |
| 6162  | PNPLA6    | 1214.052575 | -0.583657373 | 0.139101 | -4.19594  | 2.72E-05 | 8.64E-05 |
| 5325  | PCYOX1L   | 257.8536347 | -0.58366797  | 0.126604 | -4.610197 | 4.02E-06 | 1.48E-05 |
| 4780  | EIF3F     | 2696.179056 | -0.583766964 | 0.119245 | -4.895536 | 9.80E-07 | 4.02E-06 |
| 9836  | SLC8A1    | 669.0475401 | -0.584103941 | 0.21573  | -2.707566 | 0.006778 | 0.013506 |
| 7037  | ECE1      | 4304.365316 | -0.584105495 | 0.153509 | -3.805019 | 0.000142 | 0.000395 |
| 10021 | S1PR5     | 75.36863943 | -0.584203542 | 0.220898 | -2.64467  | 0.008177 | 0.015994 |

|       |           |             |              |          |           |          |          |
|-------|-----------|-------------|--------------|----------|-----------|----------|----------|
| 13311 | CYP27C1   | 2.957596226 | -0.584403358 | 0.379623 | -1.539429 | 0.123699 | 0.182153 |
| 12671 | APOL5     | 1.950946603 | -0.584450311 | 0.33448  | -1.747339 | 0.080579 | 0.124648 |
| 7799  | TRMT1     | 615.6235184 | -0.584530889 | 0.166905 | -3.50218  | 0.000461 | 0.00116  |
| 2987  | CBX4      | 363.6925068 | -0.584574159 | 0.096688 | -6.046016 | 1.48E-09 | 9.74E-09 |
| 5076  | MIER2     | 356.9868382 | -0.584973184 | 0.12358  | -4.733544 | 2.21E-06 | 8.52E-06 |
| 12254 | CXorf50B  | 4.544005027 | -0.58498677  | 0.310939 | -1.881352 | 0.059924 | 0.095852 |
| 10667 | CXorf21   | 64.7467647  | -0.585162141 | 0.243272 | -2.405386 | 0.016155 | 0.029686 |
| 3588  | AATF      | 1247.871107 | -0.585201374 | 0.104283 | -5.611647 | 2.00E-08 | 1.09E-07 |
| 10246 | SLIT3     | 1427.864198 | -0.585514433 | 0.228149 | -2.566372 | 0.010277 | 0.01966  |
| 15209 | NPFFR2    | 1.273384193 | -0.585623954 | 0.619759 | -0.944922 | 0.344699 | 0.444239 |
| 7825  | DGCR6L    | 819.6091246 | -0.585762203 | 0.167739 | -3.492096 | 0.000479 | 0.0012   |
| 13593 | PCYT1B    | 15.08782093 | -0.585947524 | 0.402063 | -1.457351 | 0.14502  | 0.209117 |
| 7570  | RAB3D     | 838.1552185 | -0.586007141 | 0.163255 | -3.589528 | 0.000331 | 0.000858 |
| 6103  | MRPS15    | 1127.911013 | -0.586040105 | 0.138849 | -4.22071  | 2.44E-05 | 7.82E-05 |
| 12937 | HIST1H2BC | 17.29080508 | -0.586288911 | 0.352464 | -1.663401 | 0.096232 | 0.145803 |
| 11230 | DC1001314 | 4.129803103 | -0.586538738 | 0.265642 | -2.208001 | 0.027244 | 0.047552 |
| 9603  | NAMPT     | 4496.7265   | -0.586609495 | 0.211053 | -2.779436 | 0.005445 | 0.011115 |
| 10928 | ESCO2     | 36.02118463 | -0.587065816 | 0.254116 | -2.310225 | 0.020876 | 0.037444 |
| 12896 | GPRIN2    | 153.3543751 | -0.587656261 | 0.351107 | -1.673725 | 0.094185 | 0.143154 |
| 4280  | PPP4C     | 1491.674702 | -0.588277224 | 0.11386  | -5.16668  | 2.38E-07 | 1.09E-06 |
| 8045  | LRRC29    | 123.7151699 | -0.58830765  | 0.173316 | -3.39442  | 0.000688 | 0.001676 |
| 8775  | CCDC18    | 50.52777917 | -0.588377049 | 0.190198 | -3.0935   | 0.001978 | 0.004418 |
| 14751 | GALNT5    | 58.90301016 | -0.588734367 | 0.543311 | -1.083605 | 0.27854  | 0.370122 |
| 6773  | RARG      | 458.4968157 | -0.5888109   | 0.150615 | -3.90937  | 9.25E-05 | 0.000268 |
| 15870 | C14orf162 | 0.741874782 | -0.58920481  | 0.782377 | -0.753096 | 0.451392 | 0.557514 |
| 8840  | TMEM71    | 46.48635959 | -0.589439061 | 0.191722 | -3.074443 | 0.002109 | 0.004676 |
| 13888 | TPSD1     | 6.836798319 | -0.589748769 | 0.436317 | -1.351651 | 0.176487 | 0.249087 |
| 10531 | AKR1E2    | 18.08832772 | -0.589856028 | 0.23979  | -2.459884 | 0.013898 | 0.025868 |
| 4258  | KDELR2    | 6442.16254  | -0.589893    | 0.113907 | -5.178714 | 2.23E-07 | 1.03E-06 |
| 16060 | PSG4      | 3.415565739 | -0.589981932 | 0.848837 | -0.695048 | 0.487026 | 0.594408 |
| 11468 | DC1001281 | 2.699472004 | -0.590066862 | 0.277105 | -2.129395 | 0.033222 | 0.056782 |
| 4057  | XKR8      | 199.679181  | -0.590264429 | 0.111331 | -5.301882 | 1.15E-07 | 5.54E-07 |
| 8248  | LTB4R2    | 67.7260886  | -0.590265394 | 0.178148 | -3.313345 | 0.000922 | 0.002191 |
| 10304 | DC1002708 | 34.71034485 | -0.590597423 | 0.232175 | -2.543765 | 0.010966 | 0.020861 |
| 3455  | IL10RB    | 1268.241055 | -0.590833968 | 0.103584 | -5.703928 | 1.17E-08 | 6.64E-08 |
| 14761 | CXCL6     | 127.5860071 | -0.590839027 | 0.546303 | -1.081522 | 0.279465 | 0.371099 |
| 11973 | TG        | 44.86400494 | -0.590896275 | 0.30025  | -1.968015 | 0.049066 | 0.080326 |
| 6502  | JMJD6     | 705.1186755 | -0.591167869 | 0.146805 | -4.026894 | 5.65E-05 | 0.00017  |
| 9896  | SPRN      | 94.95632889 | -0.591190329 | 0.219842 | -2.689155 | 0.007163 | 0.014188 |
| 4375  | RBX1      | 1027.5952   | -0.591250849 | 0.115521 | -5.118104 | 3.09E-07 | 1.38E-06 |
| 3205  | UBE2F     | 585.6037536 | -0.591286323 | 0.100537 | -5.881284 | 4.07E-09 | 2.49E-08 |
| 12994 | SEC14L5   | 29.08162083 | -0.591403255 | 0.359217 | -1.64637  | 0.099688 | 0.150383 |
| 13693 | C3orf55   | 64.24374724 | -0.592247907 | 0.417323 | -1.41916  | 0.155852 | 0.223097 |
| 14619 | HIST1H4D  | 0.606496161 | -0.59237776  | 0.525534 | -1.127193 | 0.259661 | 0.348151 |
| 2780  | RANBP1    | 688.4259349 | -0.592383109 | 0.095333 | -6.213851 | 5.17E-10 | 3.65E-09 |
| 5636  | YIPF2     | 980.6987431 | -0.592744068 | 0.133116 | -4.452848 | 8.47E-06 | 2.95E-05 |
| 11170 | RFPL3S    | 5.475897933 | -0.593301193 | 0.265924 | -2.231097 | 0.025675 | 0.045054 |



|       |          |             |              |          |           |          |          |
|-------|----------|-------------|--------------|----------|-----------|----------|----------|
| 10760 | C17orf47 | 4.015375256 | -0.593385871 | 0.249496 | -2.378341 | 0.017391 | 0.03168  |
| 7167  | SSNA1    | 723.7484516 | -0.593550611 | 0.158019 | -3.756207 | 0.000173 | 0.000472 |
| 8197  | CTU1     | 59.04567623 | -0.593602846 | 0.17807  | -3.333529 | 0.000858 | 0.002051 |
| 4177  | IQSEC2   | 495.4826886 | -0.593681198 | 0.113514 | -5.230027 | 1.69E-07 | 7.95E-07 |
| 6770  | IL4R     | 1547.886948 | -0.59370674  | 0.151803 | -3.911037 | 9.19E-05 | 0.000266 |
| 10595 | PRKCB    | 294.7263056 | -0.593943067 | 0.243726 | -2.436926 | 0.014813 | 0.027404 |
| 12747 | ABCC2    | 813.8497161 | -0.594018331 | 0.345569 | -1.718956 | 0.085622 | 0.131661 |
| 7781  | GSTO1    | 2799.083766 | -0.594778771 | 0.169576 | -3.50745  | 0.000452 | 0.00114  |
| 1452  | OS9      | 9502.066675 | -0.594790781 | 0.077928 | -7.632537 | 2.30E-14 | 3.11E-13 |
| 8871  | MAD2L1   | 164.6893055 | -0.595163606 | 0.194301 | -3.063094 | 0.002191 | 0.00484  |
| 9072  | SRGN     | 3258.399735 | -0.595168012 | 0.199068 | -2.989775 | 0.002792 | 0.006032 |
| 4537  | YEATS2   | 1302.350027 | -0.595210994 | 0.118671 | -5.015654 | 5.29E-07 | 2.28E-06 |
| 5102  | IMP4     | 699.4931687 | -0.595469145 | 0.125978 | -4.726775 | 2.28E-06 | 8.76E-06 |
| 15195 | POU4F1   | 4.993836832 | -0.595758607 | 0.627452 | -0.949488 | 0.342372 | 0.441648 |
| 11813 | PMFBP1   | 11.12440529 | -0.595768657 | 0.295316 | -2.017395 | 0.043654 | 0.072436 |
| 9058  | ZNF467   | 219.2595657 | -0.595896475 | 0.198992 | -2.994575 | 0.002748 | 0.005947 |
| 13841 | SPDEF    | 6.695368728 | -0.596215611 | 0.434917 | -1.370873 | 0.170415 | 0.241333 |
| 13809 | C10orf82 | 3.521872277 | -0.596529032 | 0.43123  | -1.38332  | 0.166567 | 0.236431 |
| 6064  | PSMB6    | 1765.633587 | -0.596714992 | 0.140775 | -4.238781 | 2.25E-05 | 7.26E-05 |
| 12337 | LILRA3   | 15.59969714 | -0.596744777 | 0.322035 | -1.853044 | 0.063876 | 0.101486 |
| 10525 | PCDHB7   | 119.2557082 | -0.59687552  | 0.24246  | -2.461749 | 0.013826 | 0.025749 |
| 9476  | SMAD5OS  | 4.451826413 | -0.597052157 | 0.211129 | -2.8279   | 0.004685 | 0.009692 |
| 10327 | SLC2A10  | 322.7290954 | -0.597448108 | 0.23544  | -2.537579 | 0.011162 | 0.021187 |
| 5094  | TXNDC5   | 7067.155959 | -0.597790907 | 0.126402 | -4.729279 | 2.25E-06 | 8.67E-06 |
| 5122  | PIGU     | 617.9541548 | -0.598439361 | 0.126887 | -4.716335 | 2.40E-06 | 9.19E-06 |
| 7072  | POLE4    | 490.180695  | -0.598551725 | 0.157744 | -3.794451 | 0.000148 | 0.00041  |
| 8281  | ZNF311   | 35.16228892 | -0.598569383 | 0.181353 | -3.30058  | 0.000965 | 0.002284 |
| 12238 | PLA2G7   | 228.9338048 | -0.599058898 | 0.317583 | -1.886306 | 0.059254 | 0.094904 |
| 4568  | SHKBP1   | 1073.741127 | -0.599087253 | 0.119821 | -4.999852 | 5.74E-07 | 2.46E-06 |
| 9646  | FAM193B  | 899.2596038 | -0.59936775  | 0.216872 | -2.763691 | 0.005715 | 0.011613 |
| 5600  | PLCB3    | 574.2753844 | -0.599502515 | 0.134041 | -4.472541 | 7.73E-06 | 2.71E-05 |
| 8825  | FAM115C  | 723.426893  | -0.599536929 | 0.194608 | -3.080749 | 0.002065 | 0.004586 |
| 10530 | ELMO3    | 590.7617595 | -0.599822976 | 0.243824 | -2.46007  | 0.013891 | 0.025857 |
| 7893  | RPS26    | 615.9820212 | -0.599824389 | 0.173768 | -3.451864 | 0.000557 | 0.001383 |
| 6274  | RRP9     | 235.4223276 | -0.599877356 | 0.144757 | -4.14402  | 3.41E-05 | 0.000107 |
| 13664 | CCDC146  | 1305.020811 | -0.599892996 | 0.41823  | -1.434362 | 0.151469 | 0.217282 |
| 10715 | ETV7     | 156.7349996 | -0.599901465 | 0.250952 | -2.390502 | 0.016825 | 0.030777 |
| 8844  | SIRPA    | 5277.403957 | -0.599970882 | 0.195187 | -3.073821 | 0.002113 | 0.004684 |
| 14196 | GREB1L   | 20.8496954  | -0.600014856 | 0.476564 | -1.259043 | 0.208015 | 0.287215 |
| 6900  | MYL6B    | 961.4840885 | -0.600138801 | 0.155265 | -3.865259 | 0.000111 | 0.000315 |
| 6584  | ARHGEF1  | 1576.260814 | -0.600270741 | 0.150435 | -3.99022  | 6.60E-05 | 0.000197 |
| 9183  | MYLK3    | 8.90491853  | -0.60072081  | 0.203947 | -2.945481 | 0.003225 | 0.006882 |
| 11727 | GLT1D1   | 16.58211501 | -0.601117914 | 0.294142 | -2.043633 | 0.04099  | 0.068512 |
| 4247  | TMEM219  | 2439.750163 | -0.601375924 | 0.116035 | -5.182707 | 2.19E-07 | 1.01E-06 |
| 10061 | CACNA1C  | 371.0069929 | -0.601596715 | 0.22855  | -2.632227 | 0.008483 | 0.016526 |
| 10947 | NODAL    | 7.401787223 | -0.601767605 | 0.261126 | -2.304512 | 0.021194 | 0.037949 |
| 703   | TPD52L2  | 2719.546823 | -0.601829176 | 0.066767 | -9.013922 | 1.99E-19 | 5.54E-18 |

|       |          |             |              |          |           |          |          |
|-------|----------|-------------|--------------|----------|-----------|----------|----------|
| 11009 | NGF      | 110.5905498 | -0.602086119 | 0.263246 | -2.287163 | 0.022186 | 0.039502 |
| 3983  | TOR2A    | 207.5286305 | -0.602126039 | 0.112485 | -5.352947 | 8.65E-08 | 4.26E-07 |
| 2699  | WIBG     | 465.9188961 | -0.602130617 | 0.095835 | -6.283007 | 3.32E-10 | 2.41E-09 |
| 10441 | C10orf95 | 5.019557557 | -0.602142006 | 0.241104 | -2.497437 | 0.012509 | 0.023484 |
| 12307 | FGF14    | 133.4494231 | -0.602483448 | 0.323427 | -1.862814 | 0.062488 | 0.099524 |
| 7914  | FAM158A  | 189.5170207 | -0.602691519 | 0.175032 | -3.443317 | 0.000575 | 0.001423 |
| 5501  | CORO1B   | 1684.171246 | -0.603371984 | 0.13345  | -4.521345 | 6.14E-06 | 2.19E-05 |
| 6024  | PSAP     | 46791.44917 | -0.603713222 | 0.141886 | -4.254903 | 2.09E-05 | 6.81E-05 |
| 10323 | ACSF2    | 405.3010445 | -0.603796537 | 0.237778 | -2.539327 | 0.011107 | 0.021089 |
| 5273  | DERL1    | 3102.415102 | -0.6043522   | 0.130267 | -4.63935  | 3.50E-06 | 1.30E-05 |
| 10690 | ZNF215   | 45.22351253 | -0.604637469 | 0.251865 | -2.400641 | 0.016366 | 0.030009 |
| 7751  | ZNF117   | 639.5633779 | -0.604690134 | 0.171847 | -3.518762 | 0.000434 | 0.001096 |
| 7716  | HIGD2A   | 1494.296242 | -0.604821795 | 0.171144 | -3.533989 | 0.000409 | 0.00104  |
| 2729  | TMEM214  | 2972.021906 | -0.605908036 | 0.096852 | -6.256005 | 3.95E-10 | 2.84E-09 |
| 11714 | GAL3ST1  | 3311.29153  | -0.60593305  | 0.295781 | -2.048587 | 0.040503 | 0.067773 |
| 12955 | ZNF488   | 5.106375434 | -0.605966717 | 0.366173 | -1.654863 | 0.097952 | 0.148202 |
| 10178 | NXPH3    | 59.72047573 | -0.606080388 | 0.234006 | -2.590024 | 0.009597 | 0.018482 |
| 8673  | ISOC2    | 1642.000415 | -0.60618105  | 0.19294  | -3.141812 | 0.001679 | 0.003795 |
| 12588 | IL31RA   | 3.284333077 | -0.606259798 | 0.341147 | -1.77712  | 0.075549 | 0.117638 |
| 11350 | HUS1B    | 3.018796462 | -0.606289419 | 0.279929 | -2.165871 | 0.030321 | 0.052363 |
| 3823  | POFUT2   | 821.049159  | -0.606527124 | 0.111223 | -5.453254 | 4.95E-08 | 2.54E-07 |
| 5437  | BRI3     | 2375.28871  | -0.606531119 | 0.133342 | -4.548675 | 5.40E-06 | 1.95E-05 |
| 12323 | DGAT2    | 81.59926433 | -0.606538868 | 0.326483 | -1.857796 | 0.063198 | 0.100523 |
| 8284  | MRPL12   | 1096.346831 | -0.606556371 | 0.183855 | -3.299108 | 0.00097  | 0.002295 |
| 14065 | CCDC108  | 9.254796605 | -0.606567505 | 0.46737  | -1.297831 | 0.194346 | 0.27084  |
| 9432  | KLHL17   | 100.254789  | -0.606619913 | 0.213226 | -2.844958 | 0.004442 | 0.00923  |
| 4357  | ABL2     | 1251.970281 | -0.607280506 | 0.118455 | -5.126692 | 2.95E-07 | 1.33E-06 |
| 7602  | RCSD1    | 617.0100844 | -0.60746037  | 0.169715 | -3.579307 | 0.000345 | 0.000888 |
| 11236 | RPL9     | 1286.089475 | -0.607548361 | 0.275537 | -2.204959 | 0.027457 | 0.047898 |
| 12056 | CGREF1   | 731.158299  | -0.607877679 | 0.312982 | -1.94221  | 0.052112 | 0.084711 |
| 10655 | TNF      | 11.96773906 | -0.608076874 | 0.252126 | -2.411796 | 0.015874 | 0.029202 |
| 9126  | DHRS13   | 253.9671509 | -0.608498585 | 0.205085 | -2.967061 | 0.003007 | 0.006458 |
| 5189  | PFDN6    | 492.1652059 | -0.608788463 | 0.130056 | -4.680982 | 2.86E-06 | 1.08E-05 |
| 3740  | NARF     | 835.2540847 | -0.608926894 | 0.110466 | -5.512326 | 3.54E-08 | 1.86E-07 |
| 1934  | RNF216L  | 266.3472778 | -0.609007657 | 0.086372 | -7.050975 | 1.78E-12 | 1.80E-11 |
| 3449  | JTB      | 2032.118228 | -0.609202899 | 0.106753 | -5.706642 | 1.15E-08 | 6.55E-08 |
| 6459  | TMEM147  | 1478.934476 | -0.609246721 | 0.150636 | -4.044487 | 5.24E-05 | 0.000159 |
| 8596  | FAM49A   | 137.5362706 | -0.609476677 | 0.191911 | -3.175837 | 0.001494 | 0.003407 |
| 9607  | HOXD10   | 192.6249221 | -0.609789208 | 0.219531 | -2.777689 | 0.005475 | 0.01117  |
| 12393 | ZNHIT2   | 158.090061  | -0.609883243 | 0.331879 | -1.83767  | 0.066111 | 0.104562 |
| 10078 | WTIP     | 163.2588613 | -0.610067788 | 0.232344 | -2.62571  | 0.008647 | 0.016818 |
| 7505  | NOTCH2   | 3193.347427 | -0.610578693 | 0.168878 | -3.615499 | 0.0003   | 0.000783 |
| 10037 | MDGA1    | 116.3973518 | -0.610596563 | 0.231306 | -2.639782 | 0.008296 | 0.016201 |
| 7243  | CLSTN3   | 3681.136867 | -0.610609605 | 0.163772 | -3.728423 | 0.000193 | 0.000521 |
| 5593  | NOMO3    | 1759.497895 | -0.610736356 | 0.136463 | -4.475463 | 7.62E-06 | 2.67E-05 |
| 8787  | GPR85    | 73.23345259 | -0.610992917 | 0.197743 | -3.089828 | 0.002003 | 0.004467 |
| 6273  | BCAS4    | 722.4869091 | -0.611076085 | 0.14746  | -4.144001 | 3.41E-05 | 0.000107 |

|       |          |             |              |          |           |          |          |
|-------|----------|-------------|--------------|----------|-----------|----------|----------|
| 9267  | CCDC102B | 283.3520737 | -0.611080849 | 0.209916 | -2.911073 | 0.003602 | 0.007619 |
| 6266  | POU2F1   | 116.1178001 | -0.61130124  | 0.147327 | -4.149278 | 3.34E-05 | 0.000104 |
| 1169  | NRBP1    | 2038.668835 | -0.611402384 | 0.075825 | -8.063292 | 7.43E-16 | 1.25E-14 |
| 6652  | ARL4A    | 531.6913872 | -0.611487834 | 0.154373 | -3.961109 | 7.46E-05 | 0.00022  |
| 8317  | SPSB2    | 206.5741885 | -0.611565257 | 0.186238 | -3.283784 | 0.001024 | 0.002414 |
| 9032  | DHCR24   | 3444.17902  | -0.611680481 | 0.203793 | -3.001482 | 0.002687 | 0.005831 |
| 6783  | RFNG     | 779.6945748 | -0.611879839 | 0.156688 | -3.905091 | 9.42E-05 | 0.000272 |
| 13480 | GP9      | 1.473482899 | -0.611974463 | 0.40939  | -1.494844 | 0.134955 | 0.196236 |
| 4880  | LMNB2    | 859.0354785 | -0.612052106 | 0.126416 | -4.841588 | 1.29E-06 | 5.17E-06 |
| 4851  | STK10    | 1088.644415 | -0.612179746 | 0.125875 | -4.863394 | 1.15E-06 | 4.66E-06 |
| 15974 | HSFY2    | 0.388627307 | -0.612510691 | 0.849307 | -0.721189 | 0.470793 | 0.57769  |
| 3371  | CABLES2  | 148.1949513 | -0.613169856 | 0.106331 | -5.766628 | 8.09E-09 | 4.70E-08 |
| 12533 | TACSTD2  | 372.6930397 | -0.613246332 | 0.341669 | -1.794857 | 0.072676 | 0.113662 |
| 14588 | GRM7     | 0.758094067 | -0.613299609 | 0.537858 | -1.140263 | 0.254177 | 0.341521 |
| 4384  | HSP90B1  | 27010.60258 | -0.614098864 | 0.120109 | -5.112845 | 3.17E-07 | 1.42E-06 |
| 7976  | FASTK    | 1376.887576 | -0.614215872 | 0.179622 | -3.419495 | 0.000627 | 0.001542 |
| 15533 | FGF23    | 0.642068028 | -0.614252143 | 0.721999 | -0.850765 | 0.3949   | 0.498322 |
| 2488  | TXNDC12  | 1766.795349 | -0.614354595 | 0.094778 | -6.482051 | 9.05E-11 | 7.13E-10 |
| 6989  | OR2A9P   | 269.6105432 | -0.614527967 | 0.160441 | -3.830253 | 0.000128 | 0.000359 |
| 12221 | RSPH9    | 30.93498917 | -0.614633353 | 0.325074 | -1.890746 | 0.058658 | 0.094081 |
| 10827 | GRAMD1B  | 94.48387397 | -0.614673401 | 0.261286 | -2.352491 | 0.018648 | 0.03376  |
| 11053 | IL4I1    | 426.8358091 | -0.614923371 | 0.270495 | -2.273329 | 0.023006 | 0.040803 |
| 12409 | SHISA7   | 1.494996135 | -0.615448642 | 0.335801 | -1.83278  | 0.066835 | 0.105572 |
| 10785 | AKR1B1   | 6572.674711 | -0.615820211 | 0.260231 | -2.366436 | 0.01796  | 0.032642 |
| 11925 | CCL3L1   | 48.96682717 | -0.616047194 | 0.31099  | -1.980921 | 0.0476   | 0.078237 |
| 8678  | FAM18A   | 28.49192292 | -0.61620927  | 0.19624  | -3.140075 | 0.001689 | 0.003815 |
| 10837 | RAB33A   | 36.96355186 | -0.616688974 | 0.262803 | -2.346584 | 0.018946 | 0.034269 |
| 4688  | PRPF31   | 1170.135512 | -0.616980985 | 0.125018 | -4.935143 | 8.01E-07 | 3.35E-06 |
| 4649  | PA2G4P4  | 53.57329109 | -0.617007702 | 0.124358 | -4.961532 | 6.99E-07 | 2.95E-06 |
| 4051  | YKT6     | 2060.971122 | -0.617060775 | 0.116296 | -5.305943 | 1.12E-07 | 5.42E-07 |
| 5058  | ATP6V1E2 | 47.03674514 | -0.617091101 | 0.130096 | -4.743359 | 2.10E-06 | 8.15E-06 |
| 6340  | PITPNM2  | 537.5150075 | -0.617673598 | 0.150358 | -4.108014 | 3.99E-05 | 0.000123 |
| 4922  | ZNF446   | 207.3761321 | -0.617720572 | 0.128258 | -4.816224 | 1.46E-06 | 5.83E-06 |
| 2995  | CNPY2    | 1387.775765 | -0.617945093 | 0.102369 | -6.03645  | 1.58E-09 | 1.03E-08 |
| 12313 | C11orf88 | 3.636587802 | -0.617990873 | 0.332097 | -1.860873 | 0.062762 | 0.099911 |
| 12151 | NBPF7    | 1.331828123 | -0.618063543 | 0.323529 | -1.910381 | 0.056084 | 0.09047  |
| 12398 | KIAA1409 | 28.98832338 | -0.61814076  | 0.336568 | -1.836598 | 0.066269 | 0.10477  |
| 6505  | YIF1A    | 1125.575988 | -0.618292506 | 0.153612 | -4.025028 | 5.70E-05 | 0.000172 |
| 13859 | C14orf50 | 13.78060482 | -0.61931099  | 0.453545 | -1.365489 | 0.172099 | 0.243403 |
| 2830  | SLC35C1  | 605.1818477 | -0.619370444 | 0.100492 | -6.163377 | 7.12E-10 | 4.93E-09 |
| 4477  | PSMC5    | 2538.076629 | -0.619410365 | 0.122567 | -5.053627 | 4.33E-07 | 1.90E-06 |
| 5040  | CEP250   | 867.9738613 | -0.619470483 | 0.130329 | -4.753123 | 2.00E-06 | 7.79E-06 |
| 11483 | DCT      | 4.121178661 | -0.619513547 | 0.291353 | -2.126334 | 0.033475 | 0.057141 |
| 8990  | NQO1     | 1204.084861 | -0.619639832 | 0.205414 | -3.016538 | 0.002557 | 0.005575 |
| 4768  | GLTSCR1  | 219.8006854 | -0.620021718 | 0.126574 | -4.898473 | 9.66E-07 | 3.97E-06 |
| 5229  | RPS13    | 8200.200653 | -0.620084989 | 0.132926 | -4.664874 | 3.09E-06 | 1.16E-05 |
| 6265  | MRPL53   | 577.2187695 | -0.620214338 | 0.149456 | -4.149812 | 3.33E-05 | 0.000104 |

|       |          |             |              |          |           |          |          |
|-------|----------|-------------|--------------|----------|-----------|----------|----------|
| 9437  | AGAP4    | 213.3220928 | -0.620230317 | 0.218168 | -2.842901 | 0.00447  | 0.009285 |
| 2525  | PPIE     | 766.4774651 | -0.620312135 | 0.096269 | -6.443541 | 1.17E-10 | 9.06E-10 |
| 9844  | FAM43A   | 502.9133573 | -0.620718927 | 0.229373 | -2.706159 | 0.006807 | 0.013553 |
| 12058 | NOXO1    | 3.144500033 | -0.620995081 | 0.319729 | -1.942255 | 0.052106 | 0.084711 |
| 11870 | GNAT2    | 1.4298977   | -0.621398712 | 0.310645 | -2.000347 | 0.045463 | 0.075073 |
| 16225 | RAD51AP2 | 0.330108679 | -0.621535846 | 0.958497 | -0.648448 | 0.516695 | 0.624206 |
| 8306  | FOXD2    | 66.12620515 | -0.621751949 | 0.188943 | -3.290682 | 0.000999 | 0.002359 |
| 6655  | RANGAP1  | 1340.028131 | -0.622023003 | 0.157042 | -3.960864 | 7.47E-05 | 0.00022  |
| 2657  | SEC61A1  | 9187.549527 | -0.622037344 | 0.098409 | -6.320958 | 2.60E-10 | 1.92E-09 |
| 10759 | STC2     | 3543.872993 | -0.622679909 | 0.261784 | -2.378598 | 0.017379 | 0.031661 |
| 5243  | APOBEC3F | 258.9226665 | -0.622718971 | 0.133803 | -4.653997 | 3.26E-06 | 1.22E-05 |
| 13529 | C14orf68 | 1.717634971 | -0.622824079 | 0.421665 | -1.47706  | 0.139659 | 0.202341 |
| 6150  | AIFM2    | 453.6574586 | -0.623163079 | 0.148272 | -4.202829 | 2.64E-05 | 8.40E-05 |
| 15840 | NRSN1    | 0.323771311 | -0.623515811 | 0.81933  | -0.761006 | 0.446653 | 0.552708 |
| 7787  | JUN      | 8167.242613 | -0.62368163  | 0.17793  | -3.505214 | 0.000456 | 0.001148 |
| 8026  | SRRM5    | 26.06909052 | -0.623700431 | 0.183397 | -3.400813 | 0.000672 | 0.001641 |
| 13833 | ZDHC2    | 1.033597889 | -0.623704938 | 0.454073 | -1.37358  | 0.169572 | 0.240279 |
| 6016  | PHLDB1   | 2156.745777 | -0.623880597 | 0.146543 | -4.257313 | 2.07E-05 | 6.74E-05 |
| 6603  | SBNO2    | 1436.990053 | -0.624235857 | 0.156725 | -3.982999 | 6.81E-05 | 0.000202 |
| 4772  | C12orf10 | 1008.87295  | -0.624291365 | 0.127479 | -4.897212 | 9.72E-07 | 3.99E-06 |
| 5293  | RRBP1    | 6454.006812 | -0.624429994 | 0.135023 | -4.624613 | 3.75E-06 | 1.39E-05 |
| 6856  | SCO2     | 582.7273298 | -0.624885611 | 0.161107 | -3.878688 | 0.000105 | 0.0003   |
| 4670  | CLPP     | 894.3479036 | -0.625147146 | 0.126298 | -4.949763 | 7.43E-07 | 3.12E-06 |
| 8151  | ATP5EP2  | 37.04630167 | -0.625153257 | 0.186566 | -3.350849 | 0.000806 | 0.001937 |
| 11960 | PLIN1    | 30.05857683 | -0.625186893 | 0.31711  | -1.971512 | 0.048665 | 0.079757 |
| 5486  | AIP      | 1313.921238 | -0.625450443 | 0.138108 | -4.528689 | 5.94E-06 | 2.12E-05 |
| 15135 | GPR142   | 0.327853847 | -0.625612383 | 0.64918  | -0.963697 | 0.335198 | 0.434084 |
| 2957  | NAGK     | 1171.6766   | -0.625677879 | 0.103124 | -6.067234 | 1.30E-09 | 8.63E-09 |
| 3850  | RAG1AP1  | 774.412454  | -0.625755124 | 0.115165 | -5.433543 | 5.52E-08 | 2.81E-07 |
| 5932  | TPI1     | 21079.59809 | -0.625884035 | 0.145451 | -4.303067 | 1.68E-05 | 5.57E-05 |
| 11735 | KIR3DL2  | 4.768194899 | -0.625898917 | 0.306483 | -2.042195 | 0.041132 | 0.068709 |
| 6080  | FAM71D   | 14.1551025  | -0.626413018 | 0.148107 | -4.229451 | 2.34E-05 | 7.55E-05 |
| 6547  | RBM42    | 1192.271488 | -0.626462347 | 0.156367 | -4.006362 | 6.17E-05 | 0.000185 |
| 11025 | APOBEC3A | 25.701621   | -0.626574971 | 0.274633 | -2.281498 | 0.022519 | 0.040036 |
| 10634 | WDR93    | 24.09449797 | -0.627031049 | 0.258948 | -2.421455 | 0.015459 | 0.028494 |
| 9357  | TBC1D2   | 486.7202305 | -0.627080546 | 0.217928 | -2.877465 | 0.004009 | 0.008398 |
| 10144 | PIK3CG   | 189.6625884 | -0.627146983 | 0.241195 | -2.60017  | 0.009318 | 0.018004 |
| 12139 | EDIL3    | 1228.49504  | -0.627343942 | 0.32743  | -1.915966 | 0.055369 | 0.089406 |
| 5291  | PPPDE2   | 370.5550232 | -0.62744833  | 0.135641 | -4.62581  | 3.73E-06 | 1.38E-05 |
| 15717 | CTRC     | 0.349085282 | -0.627504951 | 0.78502  | -0.799349 | 0.424088 | 0.528889 |
| 15876 | C1orf110 | 0.312599891 | -0.627590179 | 0.837375 | -0.749474 | 0.453572 | 0.55998  |
| 15555 | FAM71C   | 0.267736332 | -0.627737935 | 0.742549 | -0.845383 | 0.397897 | 0.501421 |
| 16373 | CCK      | 0.314980296 | -0.627737954 | 1.033299 | -0.607508 | 0.543514 | 0.650669 |
| 15793 | SEL1L2   | 0.252947203 | -0.627737958 | 0.806571 | -0.778279 | 0.436404 | 0.54163  |
| 15485 | OR52B6   | 0.229158123 | -0.627737965 | 0.724975 | -0.865875 | 0.386559 | 0.489308 |
| 16753 | SYT14L   | 0.275525807 | -0.627737972 | 1.245041 | -0.50419  | 0.614128 | 0.718529 |
| 16357 | PBOV1    | 0.249136603 | -0.627737984 | 1.025715 | -0.612001 | 0.540537 | 0.647739 |

|       |           |             |              |          |           |          |          |
|-------|-----------|-------------|--------------|----------|-----------|----------|----------|
| 15608 | ACER1     | 0.215479946 | -0.627737985 | 0.753425 | -0.833179 | 0.404744 | 0.508289 |
| 16211 | SPACA4    | 0.235272112 | -0.627738002 | 0.961644 | -0.652776 | 0.513901 | 0.621366 |
| 16447 | TCF23     | 0.199314839 | -0.627738089 | 1.068118 | -0.587705 | 0.55673  | 0.663493 |
| 16272 | C7orf45   | 0.177217664 | -0.627738093 | 0.99028  | -0.6339   | 0.526146 | 0.633749 |
| 16277 | PAGE5     | 0.175864095 | -0.627738093 | 0.990866 | -0.633525 | 0.526391 | 0.633849 |
| 17136 | GABRG3    | 0.236716356 | -0.627738146 | 1.561196 | -0.402088 | 0.687619 | 0.786533 |
| 16575 | SNORA24   | 0.176043965 | -0.627738148 | 1.13376  | -0.553678 | 0.579799 | 0.68565  |
| 16724 | DAD1L     | 0.151892385 | -0.627738229 | 1.221905 | -0.513738 | 0.607436 | 0.711904 |
| 17299 | LRTM1     | 0.194761022 | -0.627738361 | 1.709847 | -0.367131 | 0.713521 | 0.80847  |
| 17131 | BLID      | 0.152579758 | -0.627738424 | 1.555843 | -0.403472 | 0.686601 | 0.78559  |
| 17316 | SNORA10   | 0.118515341 | -0.627738716 | 1.728383 | -0.363194 | 0.71646  | 0.811003 |
| 17332 | NLRP10    | 0.111449178 | -0.62773873  | 1.743445 | -0.360056 | 0.718805 | 0.812906 |
| 17452 | IL25      | 0.112964175 | -0.627738906 | 1.923344 | -0.326379 | 0.744138 | 0.835769 |
| 17600 | C4orf17   | 0.118522716 | -0.627739141 | 2.138347 | -0.293563 | 0.769092 | 0.856533 |
| 17724 | INSL6     | 0.133068526 | -0.62773929  | 2.397211 | -0.261862 | 0.793428 | 0.877441 |
| 17871 | SSX5      | 0.154296792 | -0.627739437 | 2.690147 | -0.233348 | 0.815491 | 0.894435 |
| 17903 | KRT38     | 0.122645274 | -0.627739951 | 2.755799 | -0.227789 | 0.81981  | 0.897565 |
| 17909 | SPAG11A   | 0.116554045 | -0.627739977 | 2.773543 | -0.226331 | 0.820944 | 0.898504 |
| 15801 | SPERT     | 0.956880818 | -0.627897188 | 0.809399 | -0.775757 | 0.437892 | 0.543201 |
| 13715 | CRNA0018  | 4.340727703 | -0.627987312 | 0.444072 | -1.414155 | 0.157316 | 0.224831 |
| 2581  | POLR2G    | 856.9127262 | -0.628196663 | 0.098146 | -6.400644 | 1.55E-10 | 1.18E-09 |
| 2695  | SIDT2     | 1152.671353 | -0.628215142 | 0.099936 | -6.286147 | 3.25E-10 | 2.37E-09 |
| 8499  | DGKD      | 1058.200981 | -0.628810889 | 0.1961   | -3.20659  | 0.001343 | 0.003098 |
| 14277 | FOXA1     | 10.38370886 | -0.628839526 | 0.509047 | -1.235326 | 0.216709 | 0.297528 |
| 15832 | PRSS1     | 0.956071601 | -0.6289069   | 0.822042 | -0.765055 | 0.444239 | 0.549995 |
| 9988  | TRIM58    | 23.33801571 | -0.629128962 | 0.2368   | -2.656796 | 0.007889 | 0.015481 |
| 9773  | TPPP3     | 632.6990631 | -0.62936738  | 0.231016 | -2.724345 | 0.006443 | 0.012923 |
| 8329  | PPDPF     | 3948.258982 | -0.629492009 | 0.191882 | -3.280624 | 0.001036 | 0.002438 |
| 9473  | DFNB59    | 30.46534458 | -0.629944561 | 0.222574 | -2.830271 | 0.004651 | 0.009623 |
| 2263  | EIF5AL1   | 1234.094448 | -0.630109646 | 0.094228 | -6.687051 | 2.28E-11 | 1.97E-10 |
| 4238  | C19orf43  | 1819.33319  | -0.63054764  | 0.121557 | -5.187243 | 2.13E-07 | 9.87E-07 |
| 3395  | TMEM43    | 2742.196262 | -0.630797804 | 0.109705 | -5.749942 | 8.93E-09 | 5.15E-08 |
| 5848  | ENTPD6    | 1617.544918 | -0.6308875   | 0.145103 | -4.347853 | 1.37E-05 | 4.61E-05 |
| 2697  | AP1M1     | 1619.658318 | -0.631583747 | 0.100515 | -6.28349  | 3.31E-10 | 2.41E-09 |
| 5255  | INO80E    | 776.8418482 | -0.631719619 | 0.135915 | -4.647914 | 3.35E-06 | 1.25E-05 |
| 2401  | CARS      | 1025.814785 | -0.631747984 | 0.09633  | -6.558196 | 5.45E-11 | 4.45E-10 |
| 5953  | LIN37     | 149.6663333 | -0.631894182 | 0.147311 | -4.289531 | 1.79E-05 | 5.90E-05 |
| 8380  | MSTO2P    | 100.2357738 | -0.632082381 | 0.194012 | -3.25796  | 0.001122 | 0.002624 |
| 5774  | LOC375190 | 96.69223931 | -0.632184228 | 0.144228 | -4.383228 | 1.17E-05 | 3.97E-05 |
| 14362 | CSAG1     | 1.644694962 | -0.632187157 | 0.522583 | -1.209735 | 0.226381 | 0.30896  |
| 5801  | GTF2IRD1  | 472.9035746 | -0.632399339 | 0.144583 | -4.373944 | 1.22E-05 | 4.12E-05 |
| 9329  | TNFRSF12A | 2228.15253  | -0.632481714 | 0.218951 | -2.888696 | 0.003868 | 0.008128 |
| 13904 | HSPC072   | 1.377673072 | -0.632877353 | 0.469507 | -1.347962 | 0.177671 | 0.250433 |
| 5599  | CLEC2D    | 658.2624904 | -0.632885337 | 0.141499 | -4.472714 | 7.72E-06 | 2.70E-05 |
| 11778 | PDZK1IP1  | 8590.907669 | -0.63292487  | 0.312027 | -2.028432 | 0.042516 | 0.070756 |
| 3688  | HGS       | 1704.261305 | -0.633004755 | 0.114186 | -5.543642 | 2.96E-08 | 1.57E-07 |
| 11121 | RPA4      | 2.546208549 | -0.633538563 | 0.282198 | -2.245015 | 0.024767 | 0.043653 |

|       |           |             |              |          |           |          |          |
|-------|-----------|-------------|--------------|----------|-----------|----------|----------|
| 10677 | TMEM198   | 156.6981976 | -0.633596513 | 0.263592 | -2.4037   | 0.01623  | 0.029798 |
| 14466 | ATCAY     | 1.47970598  | -0.63359696  | 0.537677 | -1.178398 | 0.238638 | 0.323348 |
| 5724  | BRMS1     | 814.3757576 | -0.633671792 | 0.143712 | -4.409316 | 1.04E-05 | 3.55E-05 |
| 12011 | RGS13     | 6.345281206 | -0.634020079 | 0.323776 | -1.958207 | 0.050206 | 0.081932 |
| 8433  | HOXA3     | 284.2688998 | -0.634072243 | 0.195946 | -3.235956 | 0.001212 | 0.002818 |
| 3880  | UBC       | 57253.21185 | -0.634101931 | 0.117113 | -5.414463 | 6.15E-08 | 3.11E-07 |
| 4061  | ZNF341    | 93.41139841 | -0.634456031 | 0.119682 | -5.301191 | 1.15E-07 | 5.55E-07 |
| 7583  | STX11     | 210.7711029 | -0.634598701 | 0.177008 | -3.585141 | 0.000337 | 0.000871 |
| 7178  | C1orf159  | 122.3748748 | -0.634634027 | 0.16912  | -3.752565 | 0.000175 | 0.000478 |
| 5705  | RGS3      | 1280.917032 | -0.63520495  | 0.143809 | -4.417001 | 1.00E-05 | 3.44E-05 |
| 3220  | PSMB4     | 4079.487729 | -0.635541391 | 0.108198 | -5.873871 | 4.26E-09 | 2.59E-08 |
| 5770  | MTX1      | 835.2531552 | -0.635678466 | 0.144914 | -4.38658  | 1.15E-05 | 3.91E-05 |
| 13482 | HEPACAM   | 1.682468152 | -0.635865708 | 0.425835 | -1.493222 | 0.135379 | 0.196815 |
| 5611  | SH3PXD2A  | 1527.15195  | -0.635874933 | 0.142361 | -4.466627 | 7.95E-06 | 2.78E-05 |
| 12859 | CBLN4     | 90.13192603 | -0.636168902 | 0.376523 | -1.689588 | 0.091107 | 0.138874 |
| 7892  | PEMT      | 312.6382527 | -0.636446616 | 0.184349 | -3.452408 | 0.000556 | 0.00138  |
| 9866  | NLRP12    | 11.81435959 | -0.636469183 | 0.235911 | -2.697918 | 0.006977 | 0.013861 |
| 4124  | LMBR1L    | 499.9604902 | -0.63651841  | 0.12083  | -5.267867 | 1.38E-07 | 6.56E-07 |
| 4380  | SSR2      | 5980.35563  | -0.636582828 | 0.124471 | -5.114291 | 3.15E-07 | 1.41E-06 |
| 8721  | TTC21A    | 66.53353071 | -0.637255006 | 0.204185 | -3.12097  | 0.001803 | 0.004051 |
| 2226  | BRD9      | 687.982424  | -0.63734724  | 0.094788 | -6.723929 | 1.77E-11 | 1.56E-10 |
| 7370  | ATAD2     | 340.9033391 | -0.637359818 | 0.173675 | -3.66985  | 0.000243 | 0.000645 |
| 11591 | SCNN1D    | 65.84698941 | -0.637381288 | 0.305947 | -2.083308 | 0.037223 | 0.062946 |
| 6546  | TMEM205   | 2266.781398 | -0.637515974 | 0.159117 | -4.006574 | 6.16E-05 | 0.000184 |
| 4018  | EML3      | 952.8068168 | -0.637632254 | 0.119657 | -5.328842 | 9.88E-08 | 4.82E-07 |
| 16700 | C10orf129 | 0.884842989 | -0.637687903 | 1.228118 | -0.51924  | 0.603594 | 0.708445 |
| 4526  | ABHD12    | 1850.050796 | -0.63771338  | 0.127041 | -5.019732 | 5.17E-07 | 2.24E-06 |
| 3116  | SLC35C2   | 1085.884708 | -0.638270801 | 0.107257 | -5.950851 | 2.67E-09 | 1.68E-08 |
| 4092  | OAZ1      | 8582.267759 | -0.638335851 | 0.12078  | -5.285113 | 1.26E-07 | 6.02E-07 |
| 12246 | TMEM200C  | 14.772018   | -0.638553485 | 0.339007 | -1.8836   | 0.059619 | 0.095427 |
| 5426  | BAD       | 941.9435011 | -0.638624581 | 0.140221 | -4.554415 | 5.25E-06 | 1.90E-05 |
| 11424 | LOC644165 | 40.72020053 | -0.63896819  | 0.298505 | -2.140564 | 0.032309 | 0.055435 |
| 5160  | ZNF575    | 33.68736105 | -0.639576279 | 0.136233 | -4.69474  | 2.67E-06 | 1.01E-05 |
| 7038  | ABCA3     | 1432.106244 | -0.639659156 | 0.168149 | -3.804124 | 0.000142 | 0.000396 |
| 9403  | F2R       | 2977.427774 | -0.639805414 | 0.223931 | -2.85715  | 0.004275 | 0.008911 |
| 13082 | C1orf223  | 1.415671029 | -0.639866025 | 0.395059 | -1.619671 | 0.105303 | 0.157777 |
| 6787  | HSPBP1    | 685.3163366 | -0.639890565 | 0.163906 | -3.904002 | 9.46E-05 | 0.000273 |
| 3577  | PRKRIP1   | 647.0822052 | -0.640344604 | 0.11395  | -5.619498 | 1.92E-08 | 1.05E-07 |
| 11930 | TNFSF18   | 2.98496226  | -0.640594223 | 0.323469 | -1.980388 | 0.04766  | 0.078305 |
| 5947  | ARSA      | 963.4542941 | -0.640625067 | 0.149232 | -4.292811 | 1.76E-05 | 5.81E-05 |
| 15888 | MBL2      | 2.420015419 | -0.64068882  | 0.858343 | -0.746425 | 0.455411 | 0.561839 |
| 11703 | SUMO4     | 1.479065189 | -0.64080144  | 0.312438 | -2.05097  | 0.04027  | 0.067447 |
| 14354 | CD5L      | 31.51607542 | -0.64082732  | 0.528459 | -1.212635 | 0.22527  | 0.307615 |
| 14367 | PGLYRP2   | 4.111810541 | -0.641024323 | 0.530499 | -1.208341 | 0.226916 | 0.309583 |
| 7197  | LAMB2L    | 15.9205194  | -0.641295044 | 0.171136 | -3.747291 | 0.000179 | 0.000487 |
| 13658 | CCDC67    | 3.482600346 | -0.641476548 | 0.446686 | -1.43608  | 0.15098  | 0.21666  |
| 2511  | PTMA      | 15682.11495 | -0.641485902 | 0.099395 | -6.453899 | 1.09E-10 | 8.51E-10 |

|       |           |             |              |          |           |          |          |
|-------|-----------|-------------|--------------|----------|-----------|----------|----------|
| 13412 | INSC      | 3.25174596  | -0.641518067 | 0.42495  | -1.509632 | 0.131137 | 0.191637 |
| 13319 | CLDN16    | 5.125532938 | -0.641561202 | 0.417283 | -1.537473 | 0.124178 | 0.182747 |
| 7864  | CDC7      | 131.268519  | -0.641624164 | 0.185142 | -3.465576 | 0.000529 | 0.001319 |
| 4881  | NINJ1     | 1936.450378 | -0.641626963 | 0.132553 | -4.84055  | 1.29E-06 | 5.20E-06 |
| 7753  | GLRX      | 2648.728094 | -0.642153683 | 0.18254  | -3.517877 | 0.000435 | 0.0011   |
| 13701 | CAPNS2    | 0.963013827 | -0.642204123 | 0.453038 | -1.41755  | 0.156322 | 0.223639 |
| 6422  | MGMT      | 399.0930535 | -0.642426481 | 0.158015 | -4.065617 | 4.79E-05 | 0.000146 |
| 5313  | BZW2      | 804.8066401 | -0.642508709 | 0.139252 | -4.614005 | 3.95E-06 | 1.46E-05 |
| 8995  | TACR2     | 13.83880609 | -0.642700788 | 0.213218 | -3.014284 | 0.002576 | 0.005613 |
| 9033  | DKK3      | 1784.688288 | -0.643124159 | 0.214306 | -3.000956 | 0.002691 | 0.00584  |
| 12623 | FAM183A   | 5.450627869 | -0.643239719 | 0.3644   | -1.765201 | 0.07753  | 0.120388 |
| 6226  | DYNLRB1   | 3055.734041 | -0.643288546 | 0.154406 | -4.166216 | 3.10E-05 | 9.75E-05 |
| 13083 | SKINTL    | 2.046835217 | -0.643328824 | 0.397663 | -1.617774 | 0.105711 | 0.158377 |
| 11273 | LOC399959 | 219.9240958 | -0.643448671 | 0.293902 | -2.189328 | 0.028573 | 0.049682 |
| 10043 | IL18RAP   | 31.64291165 | -0.643524059 | 0.244115 | -2.636155 | 0.008385 | 0.016365 |
| 11893 | TSPAN1    | 2956.168127 | -0.643574499 | 0.323233 | -1.991052 | 0.046475 | 0.076596 |
| 5188  | HEBP2     | 1115.94759  | -0.643589878 | 0.137482 | -4.681252 | 2.85E-06 | 1.08E-05 |
| 6303  | LOC81691  | 63.4266598  | -0.64374203  | 0.156033 | -4.12567  | 3.70E-05 | 0.000115 |
| 13711 | GAL3ST2   | 1.865583526 | -0.643766294 | 0.455032 | -1.414773 | 0.157135 | 0.224638 |
| 12057 | HSF5      | 2.089571947 | -0.644146006 | 0.331655 | -1.942218 | 0.052111 | 0.084711 |
| 9492  | HLA-DQA1  | 3569.431027 | -0.644172692 | 0.228321 | -2.821353 | 0.004782 | 0.009875 |
| 2677  | ZDHC18    | 598.7315414 | -0.644254876 | 0.102253 | -6.300567 | 2.97E-10 | 2.17E-09 |
| 5870  | ZNF239    | 80.32712768 | -0.644392769 | 0.148588 | -4.336786 | 1.45E-05 | 4.83E-05 |
| 4744  | GALNAc    | 1230.492376 | -0.644533014 | 0.131225 | -4.91168  | 9.03E-07 | 3.73E-06 |
| 6611  | CCDC107   | 645.1061041 | -0.644544774 | 0.161979 | -3.979178 | 6.92E-05 | 0.000205 |
| 4860  | PRR13     | 3652.562657 | -0.644662092 | 0.132711 | -4.857652 | 1.19E-06 | 4.79E-06 |
| 12983 | LOC440925 | 9.939574702 | -0.644671994 | 0.390839 | -1.649457 | 0.099054 | 0.149546 |
| 5480  | THOC6     | 498.5377087 | -0.644745715 | 0.142326 | -4.530065 | 5.90E-06 | 2.11E-05 |
| 10064 | RGMA      | 53.91834363 | -0.64474675  | 0.245007 | -2.631547 | 0.0085   | 0.016554 |
| 5920  | NCAPG2    | 323.4990525 | -0.644759842 | 0.149487 | -4.313143 | 1.61E-05 | 5.33E-05 |
| 2269  | DDX56     | 1500.824411 | -0.64480567  | 0.096546 | -6.678711 | 2.41E-11 | 2.08E-10 |
| 16069 | SMPX      | 2.252305962 | -0.644925537 | 0.931775 | -0.692147 | 0.488845 | 0.596294 |
| 3592  | C1orf216  | 344.2259692 | -0.645067493 | 0.115021 | -5.608241 | 2.04E-08 | 1.12E-07 |
| 4236  | TNIP2     | 676.2382996 | -0.645195776 | 0.124347 | -5.188691 | 2.12E-07 | 9.80E-07 |
| 9136  | STAG3     | 30.35749563 | -0.645214253 | 0.217643 | -2.964559 | 0.003031 | 0.006503 |
| 12552 | ABCA12    | 195.702226  | -0.645314264 | 0.360551 | -1.789802 | 0.073486 | 0.114754 |
| 15651 | SUN3      | 0.541788829 | -0.645346037 | 0.784706 | -0.822404 | 0.410847 | 0.514536 |
| 3687  | CLIC1     | 8101.389624 | -0.645592721 | 0.116457 | -5.543624 | 2.96E-08 | 1.57E-07 |
| 2701  | LIMK2     | 1048.701411 | -0.645682726 | 0.1028   | -6.280988 | 3.36E-10 | 2.44E-09 |
| 2624  | NOD1      | 378.3866886 | -0.646159208 | 0.101704 | -6.353327 | 2.11E-10 | 1.57E-09 |
| 13667 | MEGF11    | 161.5060161 | -0.646386248 | 0.451005 | -1.433214 | 0.151797 | 0.217704 |
| 6378  | OGFOD2    | 373.7909478 | -0.647497051 | 0.158367 | -4.088581 | 4.34E-05 | 0.000133 |
| 3953  | RILPL1    | 371.349668  | -0.647815523 | 0.120544 | -5.374112 | 7.70E-08 | 3.82E-07 |
| 6963  | GEMIN8P4  | 16.09272694 | -0.647841114 | 0.168655 | -3.841212 | 0.000122 | 0.000345 |
| 9750  | CEACAM19  | 60.11225555 | -0.648070509 | 0.237165 | -2.732577 | 0.006284 | 0.012633 |
| 4635  | PQBP1     | 1069.080323 | -0.648089836 | 0.130357 | -4.971663 | 6.64E-07 | 2.81E-06 |
| 3106  | ELK1      | 777.4875749 | -0.648194176 | 0.108761 | -5.959798 | 2.53E-09 | 1.59E-08 |

|       |          |             |              |          |           |          |          |
|-------|----------|-------------|--------------|----------|-----------|----------|----------|
| 12545 | ABCC6P1  | 141.611129  | -0.648360817 | 0.361798 | -1.792052 | 0.073125 | 0.114242 |
| 6933  | FAM125A  | 698.1100406 | -0.648604897 | 0.16846  | -3.850208 | 0.000118 | 0.000334 |
| 6435  | ZNF205   | 336.6615588 | -0.649133967 | 0.160059 | -4.055593 | 5.00E-05 | 0.000152 |
| 6736  | CCDC124  | 1025.409886 | -0.649257568 | 0.165347 | -3.926647 | 8.61E-05 | 0.000251 |
| 8363  | PMS2L11  | 26.85609765 | -0.649370908 | 0.19881  | -3.266291 | 0.00109  | 0.002554 |
| 11923 | RNF175   | 24.99614671 | -0.649809046 | 0.327939 | -1.981493 | 0.047536 | 0.078148 |
| 5859  | CAMK1    | 726.6862203 | -0.649936302 | 0.149706 | -4.34143  | 1.42E-05 | 4.74E-05 |
| 4041  | TRMT112  | 2364.352911 | -0.650722168 | 0.122502 | -5.311918 | 1.08E-07 | 5.26E-07 |
| 7610  | NDUFA2   | 1477.907853 | -0.65099714  | 0.182007 | -3.576767 | 0.000348 | 0.000896 |
| 8080  | CLDN15   | 196.2610648 | -0.65133484  | 0.192748 | -3.379211 | 0.000727 | 0.001763 |
| 7460  | PSMB9    | 1204.234626 | -0.651354981 | 0.179277 | -3.633228 | 0.00028  | 0.000735 |
| 12157 | CYP2D7P1 | 18.57658309 | -0.651787785 | 0.341497 | -1.908618 | 0.056311 | 0.090792 |
| 3854  | P2RX4    | 873.4717273 | -0.652033051 | 0.120081 | -5.429942 | 5.64E-08 | 2.87E-07 |
| 6803  | ENC1     | 745.4573274 | -0.652183897 | 0.167281 | -3.898741 | 9.67E-05 | 0.000279 |
| 11740 | PCDHA9   | 5.274195976 | -0.652312483 | 0.319608 | -2.04098  | 0.041253 | 0.068875 |
| 8034  | SLFN11   | 1411.583286 | -0.653567302 | 0.192308 | -3.398538 | 0.000677 | 0.001653 |
| 9007  | SLC6A8   | 10884.9778  | -0.653603169 | 0.217211 | -3.009077 | 0.00262  | 0.005703 |
| 12571 | CHRNA6   | 5.978963373 | -0.653750591 | 0.367033 | -1.781179 | 0.074883 | 0.11676  |
| 4200  | CDKN2D   | 138.9304014 | -0.654071656 | 0.125524 | -5.210732 | 1.88E-07 | 8.78E-07 |
| 7154  | BMF      | 377.5295508 | -0.654095778 | 0.173835 | -3.76273  | 0.000168 | 0.00046  |
| 12593 | NPPA     | 1.471832174 | -0.654105613 | 0.368369 | -1.775683 | 0.075785 | 0.11796  |
| 8212  | GNB4     | 1315.734187 | -0.654593285 | 0.19676  | -3.326867 | 0.000878 | 0.002096 |
| 9758  | CDRT15P  | 4.203060944 | -0.654682079 | 0.239881 | -2.729194 | 0.006349 | 0.012753 |
| 4157  | SLC5A6   | 522.777772  | -0.654788366 | 0.124811 | -5.24624  | 1.55E-07 | 7.32E-07 |
| 11708 | HIST1H1E | 3.720659931 | -0.654823568 | 0.319377 | -2.050316 | 0.040334 | 0.067525 |
| 9161  | POTEF    | 9.577880331 | -0.655224372 | 0.221768 | -2.954548 | 0.003131 | 0.0067   |
| 5875  | SIRT6    | 300.4692142 | -0.655239907 | 0.151155 | -4.334874 | 1.46E-05 | 4.87E-05 |
| 5132  | EBPL     | 416.2015174 | -0.655336425 | 0.139039 | -4.713342 | 2.44E-06 | 9.31E-06 |
| 10342 | LAMB4    | 9.917928786 | -0.655373805 | 0.258826 | -2.532104 | 0.011338 | 0.021489 |
| 12440 | COL23A1  | 3409.56713  | -0.655455418 | 0.359274 | -1.824388 | 0.068093 | 0.107291 |
| 7968  | NRP2     | 1742.792932 | -0.655570413 | 0.191563 | -3.422226 | 0.000621 | 0.001528 |
| 8963  | TTLL3    | 579.9311999 | -0.655614196 | 0.216658 | -3.026034 | 0.002478 | 0.005419 |
| 11723 | DLX3     | 4.256269565 | -0.655804712 | 0.320597 | -2.045572 | 0.040798 | 0.068216 |
| 12728 | SCARNA1c | 1.506534387 | -0.655936853 | 0.380534 | -1.723726 | 0.084757 | 0.130529 |
| 6888  | DLG4     | 206.4597362 | -0.655971333 | 0.169571 | -3.868425 | 0.00011  | 0.000312 |
| 13252 | UROC1    | 1.536556831 | -0.65598222  | 0.419772 | -1.562709 | 0.118121 | 0.174713 |
| 5430  | C17orf70 | 791.7802045 | -0.656062159 | 0.1441   | -4.552822 | 5.29E-06 | 1.91E-05 |
| 4976  | UXT      | 1131.690177 | -0.656080128 | 0.137097 | -4.785525 | 1.71E-06 | 6.72E-06 |
| 13244 | PIN1L    | 0.679315569 | -0.656326898 | 0.419365 | -1.56505  | 0.117571 | 0.174004 |
| 12964 | CTNND2   | 4.454207233 | -0.656581431 | 0.397059 | -1.653611 | 0.098207 | 0.148484 |
| 2676  | FANCG    | 231.3621509 | -0.656688563 | 0.104202 | -6.302069 | 2.94E-10 | 2.15E-09 |
| 13344 | CRB2     | 58.04386548 | -0.656697353 | 0.42913  | -1.530299 | 0.125943 | 0.184997 |
| 9804  | BATF3    | 75.3021313  | -0.656756269 | 0.241863 | -2.715404 | 0.00662  | 0.013234 |
| 12802 | ITIH2    | 4.052820669 | -0.656979383 | 0.385839 | -1.702727 | 0.088619 | 0.135684 |
| 13738 | TRH      | 0.790348579 | -0.657176844 | 0.46773  | -1.405035 | 0.160011 | 0.228299 |
| 1837  | PSMA5    | 1332.611241 | -0.657228818 | 0.091906 | -7.151109 | 8.61E-13 | 9.18E-12 |
| 12746 | SUSD4    | 86.18815418 | -0.657440243 | 0.382428 | -1.71912  | 0.085593 | 0.131626 |



|       |           |             |              |          |           |          |          |
|-------|-----------|-------------|--------------|----------|-----------|----------|----------|
| 7417  | NUDT18    | 213.4971337 | -0.657706546 | 0.180208 | -3.649714 | 0.000263 | 0.000694 |
| 5779  | ELOF1     | 854.8084866 | -0.658764548 | 0.150326 | -4.382248 | 1.17E-05 | 3.98E-05 |
| 8469  | C19orf70  | 1135.200187 | -0.659075162 | 0.204697 | -3.219764 | 0.001283 | 0.002969 |
| 14742 | GUCY1B2   | 19.65535911 | -0.659319587 | 0.606698 | -1.086734 | 0.277155 | 0.368505 |
| 1073  | PSMB2     | 1668.537133 | -0.65933112  | 0.080375 | -8.203178 | 2.34E-16 | 4.28E-15 |
| 6342  | C12orf24  | 158.1014172 | -0.659402286 | 0.160522 | -4.107854 | 3.99E-05 | 0.000123 |
| 7668  | GPX7      | 284.1817971 | -0.659455653 | 0.185678 | -3.551601 | 0.000383 | 0.000979 |
| 5776  | KIF22     | 644.0023883 | -0.659722526 | 0.150522 | -4.382908 | 1.17E-05 | 3.97E-05 |
| 8848  | SCD       | 12969.19952 | -0.659771644 | 0.214745 | -3.072349 | 0.002124 | 0.004705 |
| 8413  | CCDC163F  | 15.20247846 | -0.659879073 | 0.203385 | -3.244482 | 0.001177 | 0.002741 |
| 11075 | GABRD     | 301.9935491 | -0.660293351 | 0.291528 | -2.264942 | 0.023516 | 0.04162  |
| 6044  | PCDHGC3   | 3416.223866 | -0.660310639 | 0.155477 | -4.247003 | 2.17E-05 | 7.03E-05 |
| 4252  | PTPN18    | 1826.140418 | -0.660415287 | 0.127463 | -5.181215 | 2.20E-07 | 1.02E-06 |
| 3744  | MPV17     | 1212.888427 | -0.660651422 | 0.1199   | -5.510004 | 3.59E-08 | 1.88E-07 |
| 8667  | EFNA1     | 2655.515912 | -0.660693297 | 0.210088 | -3.144848 | 0.001662 | 0.003758 |
| 8274  | CCDC24    | 167.4823446 | -0.661051082 | 0.200106 | -3.303509 | 0.000955 | 0.002262 |
| 4187  | SNAPC2    | 273.2362649 | -0.661650738 | 0.126834 | -5.216664 | 1.82E-07 | 8.53E-07 |
| 5633  | ABCD1     | 610.5377727 | -0.662030971 | 0.148644 | -4.453805 | 8.44E-06 | 2.94E-05 |
| 9953  | STK39     | 1574.347925 | -0.662054799 | 0.248001 | -2.669568 | 0.007595 | 0.014957 |
| 7956  | PHACTR1   | 64.99492459 | -0.662080648 | 0.19334  | -3.424431 | 0.000616 | 0.001518 |
| 7229  | DC1001342 | 149.8621169 | -0.662086396 | 0.177265 | -3.735013 | 0.000188 | 0.000509 |
| 14154 | CNTN1     | 13.98783834 | -0.662103025 | 0.521325 | -1.270039 | 0.204071 | 0.282605 |
| 4555  | WRAP53    | 182.5578725 | -0.662216663 | 0.132251 | -5.007282 | 5.52E-07 | 2.38E-06 |
| 9892  | ROBO1     | 688.4008203 | -0.662265689 | 0.246129 | -2.69073  | 0.00713  | 0.014128 |
| 4471  | ACD       | 394.305824  | -0.662308069 | 0.130975 | -5.05676  | 4.26E-07 | 1.87E-06 |
| 9389  | SAMD14    | 113.085775  | -0.662341306 | 0.231276 | -2.863853 | 0.004185 | 0.008737 |
| 6353  | CCDC102A  | 203.9214452 | -0.662357498 | 0.161574 | -4.099415 | 4.14E-05 | 0.000128 |
| 14181 | GPR22     | 0.629021247 | -0.662679202 | 0.524759 | -1.262825 | 0.206652 | 0.285635 |
| 4085  | MYD88     | 1059.178414 | -0.662715927 | 0.125276 | -5.290042 | 1.22E-07 | 5.87E-07 |
| 5658  | USE1      | 421.5475529 | -0.662857607 | 0.149157 | -4.444035 | 8.83E-06 | 3.06E-05 |
| 5300  | CHMP2A    | 2797.642715 | -0.662867392 | 0.143431 | -4.621507 | 3.81E-06 | 1.41E-05 |
| 5043  | RPS18     | 23301.61616 | -0.662929301 | 0.139534 | -4.751015 | 2.02E-06 | 7.87E-06 |
| 8613  | SYTL3     | 291.2908412 | -0.663039203 | 0.209181 | -3.169687 | 0.001526 | 0.003473 |
| 10414 | CD82      | 843.996493  | -0.663061786 | 0.264604 | -2.505866 | 0.012215 | 0.022991 |
| 4671  | TRNAU1AI  | 350.9781658 | -0.663163637 | 0.133978 | -4.949785 | 7.43E-07 | 3.12E-06 |
| 7008  | OSBPL7    | 240.1028409 | -0.663168087 | 0.173604 | -3.820004 | 0.000133 | 0.000373 |
| 6468  | BLOC1S1   | 1516.409996 | -0.66325241  | 0.164069 | -4.042516 | 5.29E-05 | 0.00016  |
| 8593  | LRDD      | 271.4456632 | -0.663481929 | 0.208908 | -3.175959 | 0.001493 | 0.003407 |
| 7217  | SLC6A6    | 1253.73172  | -0.663528605 | 0.177489 | -3.738412 | 0.000185 | 0.000503 |
| 12875 | AMY1A     | 3.649053624 | -0.663602088 | 0.394271 | -1.683111 | 0.092354 | 0.1406   |
| 2737  | TCF3      | 885.2033856 | -0.663723538 | 0.106204 | -6.249533 | 4.12E-10 | 2.95E-09 |
| 14509 | C4orf31   | 219.3407694 | -0.6641167   | 0.570634 | -1.163822 | 0.244496 | 0.330303 |
| 4442  | RAB4B     | 435.9667149 | -0.664330322 | 0.130835 | -5.077623 | 3.82E-07 | 1.69E-06 |
| 9375  | DENND2A   | 406.6285641 | -0.664336505 | 0.231446 | -2.870376 | 0.0041   | 0.008572 |
| 8662  | OLFML1    | 328.7989386 | -0.664721739 | 0.211256 | -3.146522 | 0.001652 | 0.003739 |
| 9217  | GAS1      | 74.47804181 | -0.664990134 | 0.226738 | -2.932856 | 0.003359 | 0.007142 |
| 9587  | TMEM108   | 26.94276958 | -0.665088147 | 0.238891 | -2.784061 | 0.005368 | 0.010976 |

|       |          |             |              |          |           |          |          |
|-------|----------|-------------|--------------|----------|-----------|----------|----------|
| 2665  | CDK4     | 1870.1662   | -0.665295133 | 0.105333 | -6.316085 | 2.68E-10 | 1.97E-09 |
| 8777  | PRF1     | 465.4770369 | -0.665412799 | 0.215106 | -3.093423 | 0.001979 | 0.004419 |
| 4714  | DPP9     | 1842.783494 | -0.6657058   | 0.135116 | -4.926909 | 8.35E-07 | 3.47E-06 |
| 4516  | LRWD1    | 309.9905104 | -0.665893299 | 0.132468 | -5.026833 | 4.99E-07 | 2.16E-06 |
| 9462  | CLSPN    | 38.1988753  | -0.66599324  | 0.235048 | -2.833434 | 0.004605 | 0.00954  |
| 7128  | SMAGP    | 332.3489958 | -0.666028968 | 0.176457 | -3.774458 | 0.00016  | 0.000441 |
| 6991  | MSRB3    | 916.7833259 | -0.666433593 | 0.174058 | -3.828795 | 0.000129 | 0.000361 |
| 7453  | TCTEX1D2 | 100.438372  | -0.666662204 | 0.183328 | -3.636453 | 0.000276 | 0.000727 |
| 2954  | SNF8     | 979.8253322 | -0.666996153 | 0.109915 | -6.068306 | 1.29E-09 | 8.58E-09 |
| 2947  | DCLRE1B  | 209.7392155 | -0.667255134 | 0.109874 | -6.072908 | 1.26E-09 | 8.35E-09 |
| 13359 | CTSG     | 13.95025185 | -0.667395723 | 0.437935 | -1.52396  | 0.127519 | 0.187102 |
| 3080  | ACOX3    | 353.3559812 | -0.668314388 | 0.11182  | -5.976679 | 2.28E-09 | 1.45E-08 |
| 11674 | EMR4P    | 14.15450316 | -0.668430208 | 0.324962 | -2.056951 | 0.039691 | 0.066637 |
| 3924  | C19orf61 | 469.4656842 | -0.668490558 | 0.124048 | -5.388961 | 7.09E-08 | 3.54E-07 |
| 4385  | TSPAN17  | 1007.929419 | -0.669037239 | 0.130859 | -5.112668 | 3.18E-07 | 1.42E-06 |
| 10625 | SLFN12L  | 21.81137463 | -0.669239983 | 0.276007 | -2.424724 | 0.01532  | 0.028262 |
| 3629  | EIF6     | 2553.154952 | -0.66934385  | 0.119838 | -5.585417 | 2.33E-08 | 1.26E-07 |
| 11211 | ACTA1    | 1.808790718 | -0.669566296 | 0.302052 | -2.216725 | 0.026642 | 0.04658  |
| 5868  | KIAA0415 | 619.7334297 | -0.669947031 | 0.154471 | -4.337027 | 1.44E-05 | 4.82E-05 |
| 5298  | MYOF     | 4421.354649 | -0.670067294 | 0.144959 | -4.622454 | 3.79E-06 | 1.40E-05 |
| 4273  | H6PD     | 2945.195207 | -0.670078155 | 0.129611 | -5.169898 | 2.34E-07 | 1.07E-06 |
| 11088 | SPEF1    | 34.25178407 | -0.670379544 | 0.296596 | -2.260245 | 0.023806 | 0.042084 |
| 10067 | CCL22    | 28.50675522 | -0.670554504 | 0.254969 | -2.629944 | 0.00854  | 0.016628 |
| 14161 | C21orf29 | 1.201836101 | -0.670558223 | 0.529029 | -1.267526 | 0.204967 | 0.283706 |
| 10384 | RS1      | 3.867458681 | -0.671037221 | 0.267144 | -2.511889 | 0.012009 | 0.022668 |
| 8956  | FAM186A  | 8.251076471 | -0.671065621 | 0.221458 | -3.03022  | 0.002444 | 0.005348 |
| 4770  | TXNDC17  | 790.7545628 | -0.671139242 | 0.137025 | -4.897924 | 9.69E-07 | 3.98E-06 |
| 7233  | HLA-DMB  | 2089.346221 | -0.671211338 | 0.179857 | -3.73192  | 0.00019  | 0.000515 |
| 7890  | GINS4    | 76.44028225 | -0.671311745 | 0.194385 | -3.453517 | 0.000553 | 0.001375 |
| 6573  | ANKDD1A  | 77.58919255 | -0.671359891 | 0.168106 | -3.993676 | 6.51E-05 | 0.000194 |
| 8137  | PSTPIP2  | 180.2419832 | -0.671503723 | 0.199989 | -3.357696 | 0.000786 | 0.001893 |
| 3281  | ADRBK1   | 1738.402424 | -0.671561243 | 0.115194 | -5.829852 | 5.55E-09 | 3.31E-08 |
| 8158  | FGD1     | 219.3506407 | -0.672655873 | 0.20089  | -3.34838  | 0.000813 | 0.001953 |
| 12317 | ENTPD3   | 3.874365568 | -0.672762787 | 0.361756 | -1.859713 | 0.062926 | 0.100139 |
| 3093  | RPL6     | 9112.896327 | -0.673023584 | 0.112773 | -5.967953 | 2.40E-09 | 1.52E-08 |
| 13443 | FAM169B  | 12.46899952 | -0.673069361 | 0.44798  | -1.502454 | 0.13298  | 0.193896 |
| 11380 | TMEM31   | 1.891414078 | -0.673253888 | 0.311904 | -2.15853  | 0.030887 | 0.053199 |
| 6623  | ARHGAP23 | 667.7413921 | -0.673363652 | 0.169403 | -3.97491  | 7.04E-05 | 0.000208 |
| 9240  | KIAA1045 | 11.98303728 | -0.673381499 | 0.23048  | -2.921649 | 0.003482 | 0.007386 |
| 3212  | POLM     | 513.1877913 | -0.673402488 | 0.114546 | -5.87887  | 4.13E-09 | 2.52E-08 |
| 9782  | AKR1C3   | 3255.936038 | -0.67341616  | 0.247399 | -2.721987 | 0.006489 | 0.013003 |
| 10508 | NSUN5P2  | 386.2653281 | -0.673507258 | 0.272783 | -2.469023 | 0.013548 | 0.025272 |
| 2712  | AP2M1    | 8053.935125 | -0.67358008  | 0.107464 | -6.267973 | 3.66E-10 | 2.64E-09 |
| 3198  | RPS23    | 14682.57581 | -0.67361412  | 0.114465 | -5.884897 | 3.98E-09 | 2.44E-08 |
| 4541  | PDCD5    | 961.5098349 | -0.673847444 | 0.13443  | -5.012609 | 5.37E-07 | 2.32E-06 |
| 5373  | CTSA     | 6492.700892 | -0.674001016 | 0.147143 | -4.580576 | 4.64E-06 | 1.69E-05 |
| 9913  | CCR2     | 166.9297669 | -0.674871555 | 0.251447 | -2.683952 | 0.007276 | 0.014386 |

|       |           |             |              |          |           |          |          |
|-------|-----------|-------------|--------------|----------|-----------|----------|----------|
| 7024  | SMOX      | 413.2259747 | -0.674879332 | 0.177    | -3.812878 | 0.000137 | 0.000383 |
| 7450  | RBKS      | 393.1710077 | -0.675125546 | 0.185623 | -3.637082 | 0.000276 | 0.000725 |
| 10029 | FDP2L2A   | 5.506601189 | -0.675545428 | 0.255671 | -2.64224  | 0.008236 | 0.016097 |
| 7966  | PAMR1     | 276.8291803 | -0.676119377 | 0.197553 | -3.422469 | 0.000621 | 0.001527 |
| 1023  | C19orf50  | 1423.991047 | -0.676504742 | 0.081522 | -8.298396 | 1.06E-16 | 2.02E-15 |
| 10653 | UNC5C     | 27.16203009 | -0.67658911  | 0.280376 | -2.413149 | 0.015815 | 0.029099 |
| 5315  | TMEM208   | 911.9548748 | -0.676808983 | 0.146701 | -4.61354  | 3.96E-06 | 1.46E-05 |
| 1504  | CTNBL1    | 1027.726451 | -0.676838145 | 0.089547 | -7.558442 | 4.08E-14 | 5.32E-13 |
| 6050  | BBC3      | 186.9300693 | -0.67693347  | 0.159561 | -4.242474 | 2.21E-05 | 7.16E-05 |
| 12761 | PCDHA4    | 82.74429746 | -0.677117128 | 0.394722 | -1.715429 | 0.086267 | 0.132506 |
| 6143  | TREX1     | 352.5704161 | -0.677253101 | 0.161097 | -4.204015 | 2.62E-05 | 8.37E-05 |
| 9769  | REM2      | 6.053971326 | -0.677272206 | 0.248501 | -2.725435 | 0.006422 | 0.012885 |
| 11669 | HOXA11A5  | 21.29863882 | -0.677317531 | 0.329176 | -2.057613 | 0.039627 | 0.066564 |
| 8744  | DTL       | 149.8383382 | -0.677408312 | 0.217778 | -3.110551 | 0.001867 | 0.004186 |
| 6694  | CLIP2     | 1103.449343 | -0.677461692 | 0.171852 | -3.942131 | 8.08E-05 | 0.000236 |
| 10049 | FSCN3     | 1.876332382 | -0.67772658  | 0.257172 | -2.635309 | 0.008406 | 0.016396 |
| 5855  | STK11IP   | 374.0489591 | -0.678196187 | 0.156138 | -4.343579 | 1.40E-05 | 4.69E-05 |
| 10093 | TLR10     | 33.18413392 | -0.678492802 | 0.259039 | -2.619271 | 0.008812 | 0.017113 |
| 4327  | XYLT2     | 945.3921829 | -0.678549316 | 0.131937 | -5.142967 | 2.70E-07 | 1.23E-06 |
| 6346  | PQLC2     | 310.9337438 | -0.678651257 | 0.16532  | -4.105088 | 4.04E-05 | 0.000125 |
| 9978  | HOXA2     | 25.12111384 | -0.678651628 | 0.255079 | -2.660559 | 0.007801 | 0.015325 |
| 10189 | PCDHGA5   | 25.15134052 | -0.678765286 | 0.262446 | -2.586306 | 0.009701 | 0.018663 |
| 11061 | PCDHA5    | 15.68713767 | -0.679307987 | 0.299317 | -2.269528 | 0.023236 | 0.041177 |
| 9958  | RNFT2     | 58.45017796 | -0.679710954 | 0.254711 | -2.66856  | 0.007618 | 0.014994 |
| 6672  | ANKRD34A  | 24.61584665 | -0.679795108 | 0.171974 | -3.952883 | 7.72E-05 | 0.000227 |
| 3445  | SEMA4F    | 273.9058159 | -0.67988979  | 0.11907  | -5.710009 | 1.13E-08 | 6.43E-08 |
| 3428  | RPL26L1   | 329.5679003 | -0.679981174 | 0.118803 | -5.723624 | 1.04E-08 | 5.96E-08 |
| 8246  | SLC26A6   | 151.4602275 | -0.680334751 | 0.205301 | -3.31384  | 0.00092  | 0.002187 |
| 10163 | METTL7B   | 977.4087485 | -0.680502771 | 0.262289 | -2.594473 | 0.009474 | 0.018271 |
| 3896  | AKT1S1    | 1115.051015 | -0.680538792 | 0.125885 | -5.406045 | 6.44E-08 | 3.24E-07 |
| 8285  | DC1001282 | 9.799428588 | -0.680583774 | 0.206303 | -3.298948 | 0.00097  | 0.002296 |
| 7601  | LHFP      | 1611.132335 | -0.68068947  | 0.190165 | -3.579458 | 0.000344 | 0.000888 |
| 10706 | CYP2E1    | 25.97129685 | -0.68089688  | 0.284274 | -2.395216 | 0.016611 | 0.030411 |
| 3214  | RBMX2     | 412.5629502 | -0.68093145  | 0.115845 | -5.877933 | 4.15E-09 | 2.53E-08 |
| 4820  | RRP1      | 487.9799346 | -0.681096703 | 0.139576 | -4.879765 | 1.06E-06 | 4.32E-06 |
| 11130 | PLEKHG6   | 77.68967005 | -0.681229096 | 0.303746 | -2.242763 | 0.024912 | 0.043873 |
| 7415  | ATP5J2    | 1825.367072 | -0.681361946 | 0.18669  | -3.649695 | 0.000263 | 0.000694 |
| 14114 | SNORA63   | 1.336530525 | -0.681472526 | 0.531402 | -1.282406 | 0.1997   | 0.277337 |
| 15312 | DUXA      | 0.320559494 | -0.681499659 | 0.7421   | -0.91834  | 0.358441 | 0.458843 |
| 2698  | EIF3I     | 3482.935532 | -0.681764275 | 0.108502 | -6.283417 | 3.31E-10 | 2.41E-09 |
| 7703  | PPP1R13L  | 863.4525285 | -0.681942294 | 0.192659 | -3.539642 | 0.000401 | 0.00102  |
| 13974 | C12orf71  | 0.478833982 | -0.682359168 | 0.51386  | -1.327907 | 0.184209 | 0.258385 |
| 5944  | PRDX4     | 2471.404706 | -0.682393732 | 0.158901 | -4.294455 | 1.75E-05 | 5.77E-05 |
| 9468  | EPHX4     | 25.76364321 | -0.682467561 | 0.241063 | -2.831078 | 0.004639 | 0.009604 |
| 7476  | QTRT1     | 691.3740091 | -0.682609379 | 0.188264 | -3.625805 | 0.000288 | 0.000755 |
| 12278 | FCRL3     | 35.35973017 | -0.682901017 | 0.364706 | -1.872471 | 0.061142 | 0.097608 |
| 10284 | LOC643719 | 6.886290878 | -0.68292613  | 0.267632 | -2.551732 | 0.010719 | 0.02043  |

|       |           |             |              |          |           |          |          |
|-------|-----------|-------------|--------------|----------|-----------|----------|----------|
| 8649  | TBX21     | 39.88791655 | -0.682994907 | 0.21672  | -3.151504 | 0.001624 | 0.003681 |
| 6221  | SERPINB8  | 293.7198903 | -0.683339112 | 0.163924 | -4.168638 | 3.06E-05 | 9.65E-05 |
| 5617  | RABAC1    | 1474.247096 | -0.683439636 | 0.153093 | -4.464223 | 8.04E-06 | 2.80E-05 |
| 7373  | RASSF4    | 4172.057165 | -0.68346801  | 0.186261 | -3.669403 | 0.000243 | 0.000646 |
| 6249  | BCL6      | 1664.429664 | -0.684198809 | 0.164669 | -4.154992 | 3.25E-05 | 0.000102 |
| 8165  | C12orf68  | 28.3010092  | -0.684407905 | 0.204508 | -3.346606 | 0.000818 | 0.001964 |
| 12002 | TMPRSS9   | 1.777635509 | -0.684507669 | 0.349208 | -1.960172 | 0.049976 | 0.081617 |
| 6091  | ABHD14A   | 286.8354777 | -0.684566947 | 0.162029 | -4.224969 | 2.39E-05 | 7.69E-05 |
| 3939  | CYB5R3    | 9586.068806 | -0.684600866 | 0.127265 | -5.379333 | 7.48E-08 | 3.72E-07 |
| 8011  | AGPAT2    | 1202.06887  | -0.685034961 | 0.201128 | -3.40597  | 0.000659 | 0.001613 |
| 10640 | FGF11     | 888.0280843 | -0.685397919 | 0.283453 | -2.418027 | 0.015605 | 0.028747 |
| 16453 | FLJ43950  | 0.256125461 | -0.685445688 | 1.169108 | -0.586298 | 0.557675 | 0.664377 |
| 16436 | SERPINB1  | 0.264001819 | -0.685445689 | 1.157231 | -0.592315 | 0.553639 | 0.660251 |
| 15017 | KHDC1L    | 0.282836634 | -0.685445693 | 0.682803 | -1.00387  | 0.315441 | 0.411731 |
| 15267 | AGBL1     | 0.265433793 | -0.685445705 | 0.737758 | -0.929092 | 0.352841 | 0.452976 |
| 15392 | C7orf34   | 0.240125171 | -0.685445721 | 0.767902 | -0.892621 | 0.37206  | 0.473801 |
| 16828 | KCNH5     | 0.284980467 | -0.685445733 | 1.41667  | -0.483843 | 0.628497 | 0.732044 |
| 16386 | C6orf15   | 0.163073655 | -0.685445876 | 1.135808 | -0.603487 | 0.546185 | 0.653279 |
| 16710 | OR2B11    | 0.183108142 | -0.685445883 | 1.326228 | -0.516839 | 0.605269 | 0.709986 |
| 17123 | FRG2      | 0.205175073 | -0.685445906 | 1.692842 | -0.404908 | 0.685545 | 0.784755 |
| 17110 | NXPH1     | 0.196264928 | -0.685446064 | 1.674521 | -0.409339 | 0.682291 | 0.781624 |
| 17134 | RPS4Y2    | 0.138456929 | -0.685446243 | 1.70381  | -0.402302 | 0.687462 | 0.786444 |
| 17327 | LIN28B    | 0.140544038 | -0.685446268 | 1.900024 | -0.360757 | 0.718281 | 0.812549 |
| 17333 | CFHR5     | 0.124943001 | -0.685446375 | 1.904982 | -0.359818 | 0.718983 | 0.813015 |
| 17337 | DMRTC2    | 0.121745177 | -0.685446379 | 1.910835 | -0.358716 | 0.719808 | 0.813806 |
| 17716 | LOC283332 | 0.188642677 | -0.685446753 | 2.605108 | -0.263116 | 0.792461 | 0.876779 |
| 17853 | CLPS      | 0.144093611 | -0.685447013 | 2.91407  | -0.23522  | 0.814038 | 0.893444 |
| 17789 | C18orf62  | 0.121135844 | -0.685447108 | 2.769106 | -0.247534 | 0.804495 | 0.886442 |
| 17857 | MT1B      | 0.131215288 | -0.685447258 | 2.91407  | -0.23522  | 0.814038 | 0.893444 |
| 17854 | GAGE2A    | 0.125715902 | -0.685447258 | 2.91407  | -0.23522  | 0.814038 | 0.893444 |
| 17856 | LOC145845 | 0.164375848 | -0.685447258 | 2.91407  | -0.23522  | 0.814038 | 0.893444 |
| 7562  | PTGER4    | 236.475992  | -0.685694539 | 0.190902 | -3.591861 | 0.000328 | 0.000851 |
| 10950 | MYH11     | 4001.299334 | -0.685755182 | 0.297647 | -2.303921 | 0.021227 | 0.037997 |
| 14654 | AMHR2     | 0.579706057 | -0.685796724 | 0.614618 | -1.11581  | 0.264503 | 0.353796 |
| 11338 | ANKRD7    | 8.699966367 | -0.685916027 | 0.316173 | -2.169432 | 0.03005  | 0.05195  |
| 5734  | ZNF628    | 176.4368385 | -0.685952723 | 0.155694 | -4.405784 | 1.05E-05 | 3.60E-05 |
| 3861  | MAN1B1    | 2319.976187 | -0.686084959 | 0.126433 | -5.426451 | 5.75E-08 | 2.92E-07 |
| 9902  | NEFH      | 23.52288979 | -0.68629734  | 0.255382 | -2.687339 | 0.007202 | 0.014257 |
| 12196 | KIR2DS4   | 5.201560423 | -0.686352487 | 0.361641 | -1.897886 | 0.057711 | 0.092751 |
| 9559  | CARNS1    | 25.31445021 | -0.686747925 | 0.245569 | -2.796559 | 0.005165 | 0.01059  |
| 6863  | SLC25A1   | 2190.860542 | -0.68677317  | 0.17715  | -3.876785 | 0.000106 | 0.000302 |
| 1410  | ARPC3     | 4467.022888 | -0.687045867 | 0.089365 | -7.688071 | 1.49E-14 | 2.08E-13 |
| 5155  | NOTCH2N1  | 430.1574117 | -0.687056934 | 0.146215 | -4.698941 | 2.62E-06 | 9.94E-06 |
| 9313  | DNAH17    | 36.28984081 | -0.687141321 | 0.237282 | -2.895883 | 0.003781 | 0.007958 |
| 3316  | THOC4     | 625.6030011 | -0.687191839 | 0.11835  | -5.806441 | 6.38E-09 | 3.77E-08 |
| 3555  | MAST2     | 700.2707198 | -0.68731933  | 0.122028 | -5.63249  | 1.78E-08 | 9.79E-08 |
| 7921  | DNLZ      | 112.7099663 | -0.687531575 | 0.199842 | -3.440384 | 0.000581 | 0.001437 |

|       |           |             |              |          |           |          |          |
|-------|-----------|-------------|--------------|----------|-----------|----------|----------|
| 4333  | DDX49     | 890.0513685 | -0.687634897 | 0.133772 | -5.140343 | 2.74E-07 | 1.24E-06 |
| 7793  | KDELC1    | 380.9439056 | -0.68802548  | 0.196411 | -3.502996 | 0.00046  | 0.001157 |
| 7040  | RNF32     | 58.88849021 | -0.688298215 | 0.180973 | -3.803322 | 0.000143 | 0.000397 |
| 6522  | RPS19BP1  | 1276.718849 | -0.688757742 | 0.171462 | -4.016968 | 5.90E-05 | 0.000177 |
| 5523  | FAM108A1  | 619.5533728 | -0.688855071 | 0.152797 | -4.508294 | 6.54E-06 | 2.32E-05 |
| 3769  | OGFR      | 1244.666543 | -0.689194442 | 0.125383 | -5.496708 | 3.87E-08 | 2.01E-07 |
| 11762 | CLEC12B   | 4.040987217 | -0.689215043 | 0.338975 | -2.033233 | 0.042029 | 0.07004  |
| 3799  | NOP2      | 651.3887365 | -0.68924421  | 0.125894 | -5.474783 | 4.38E-08 | 2.26E-07 |
| 1356  | YARS      | 1526.726234 | -0.689661311 | 0.088573 | -7.786338 | 6.90E-15 | 9.97E-14 |
| 5648  | SLC25A22  | 365.0002897 | -0.689671035 | 0.155024 | -4.448803 | 8.64E-06 | 3.00E-05 |
| 6632  | C17orf90  | 313.6837115 | -0.689880131 | 0.173699 | -3.971688 | 7.14E-05 | 0.000211 |
| 8632  | FAM116B   | 288.9449688 | -0.689880709 | 0.218265 | -3.160749 | 0.001574 | 0.003573 |
| 12684 | CLDN6     | 1.168340313 | -0.689938458 | 0.395915 | -1.742644 | 0.081396 | 0.125783 |
| 5116  | HSD17B10  | 1193.626951 | -0.689986321 | 0.146169 | -4.720462 | 2.35E-06 | 9.02E-06 |
| 8572  | SNHG5     | 2009.831776 | -0.690093436 | 0.216851 | -3.182339 | 0.001461 | 0.003341 |
| 10367 | PPM1J     | 23.95570035 | -0.690185337 | 0.273971 | -2.519194 | 0.011762 | 0.022239 |
| 9171  | CCDC40    | 162.7885909 | -0.690370666 | 0.23411  | -2.948918 | 0.003189 | 0.006816 |
| 8898  | CDC25A    | 36.17511859 | -0.690413848 | 0.226178 | -3.052526 | 0.002269 | 0.004999 |
| 9307  | FAM159A   | 13.85557157 | -0.690532671 | 0.238297 | -2.897781 | 0.003758 | 0.007915 |
| 2067  | HK1       | 3004.896938 | -0.690763544 | 0.100374 | -6.881868 | 5.91E-12 | 5.60E-11 |
| 723   | CAPZB     | 4330.937899 | -0.691008933 | 0.077137 | -8.958205 | 3.30E-19 | 8.95E-18 |
| 3846  | TMEM164   | 374.5080429 | -0.691074434 | 0.127146 | -5.435282 | 5.47E-08 | 2.79E-07 |
| 7136  | MX1       | 1455.886881 | -0.69124763  | 0.183305 | -3.771023 | 0.000163 | 0.000447 |
| 9155  | CD226     | 41.96178466 | -0.691274695 | 0.233804 | -2.956643 | 0.00311  | 0.006659 |
| 2549  | MOBK2A    | 1667.431217 | -0.691646074 | 0.107631 | -6.42609  | 1.31E-10 | 1.01E-09 |
| 3403  | GRK6      | 476.4341376 | -0.692258676 | 0.120465 | -5.746532 | 9.11E-09 | 5.25E-08 |
| 3879  | NAP1L1    | 8346.525854 | -0.692372102 | 0.127852 | -5.41541  | 6.11E-08 | 3.09E-07 |
| 7690  | COX6B1    | 3828.340466 | -0.692385497 | 0.195403 | -3.54337  | 0.000395 | 0.001007 |
| 10800 | LGALS3    | 8226.288239 | -0.692490801 | 0.29333  | -2.360794 | 0.018236 | 0.033096 |
| 8397  | CRNA0017  | 192.5422208 | -0.69336948  | 0.213373 | -3.249561 | 0.001156 | 0.002698 |
| 10573 | HOXA11    | 67.90519231 | -0.693413596 | 0.283494 | -2.445956 | 0.014447 | 0.026783 |
| 3841  | C11orf24  | 807.0355746 | -0.69372542  | 0.127517 | -5.440259 | 5.32E-08 | 2.72E-07 |
| 11981 | FZp566F09 | 1.455012762 | -0.694225395 | 0.353307 | -1.964935 | 0.049422 | 0.080848 |
| 13415 | ELFN2     | 147.0982465 | -0.69427412  | 0.460015 | -1.509244 | 0.131236 | 0.191741 |
| 4215  | EEF1D     | 6850.06334  | -0.694532028 | 0.133527 | -5.201448 | 1.98E-07 | 9.20E-07 |
| 8249  | TSPYL2    | 1013.981976 | -0.694704504 | 0.209675 | -3.313252 | 0.000922 | 0.002191 |
| 5350  | STMN1     | 1319.764605 | -0.6947869   | 0.151272 | -4.59296  | 4.37E-06 | 1.60E-05 |
| 8061  | PDE4B     | 555.218876  | -0.694846539 | 0.205086 | -3.388066 | 0.000704 | 0.001712 |
| 3365  | FBXL19    | 354.6277102 | -0.694914471 | 0.120449 | -5.769386 | 7.96E-09 | 4.63E-08 |
| 6177  | LRRC37A3  | 182.7381134 | -0.694914812 | 0.165973 | -4.186925 | 2.83E-05 | 8.97E-05 |
| 5312  | LRRC23    | 430.0418943 | -0.695015763 | 0.150627 | -4.614142 | 3.95E-06 | 1.46E-05 |
| 13281 | LOC647859 | 4.539551513 | -0.695288499 | 0.448318 | -1.550881 | 0.12093  | 0.178477 |
| 2980  | AGAP3     | 1034.706688 | -0.695551183 | 0.114984 | -6.049116 | 1.46E-09 | 9.58E-09 |
| 8683  | PRH2      | 6.214893032 | -0.69595914  | 0.221802 | -3.137754 | 0.001702 | 0.003843 |
| 4611  | ZDHHC12   | 498.7841389 | -0.695997073 | 0.139648 | -4.983938 | 6.23E-07 | 2.65E-06 |
| 5418  | EPN1      | 3126.544944 | -0.696005497 | 0.152736 | -4.556909 | 5.19E-06 | 1.88E-05 |
| 5460  | SPARC     | 56555.11612 | -0.69611467  | 0.153385 | -4.538338 | 5.67E-06 | 2.04E-05 |

|       |           |             |              |          |           |          |          |
|-------|-----------|-------------|--------------|----------|-----------|----------|----------|
| 4565  | IMPDH2    | 1962.320062 | -0.696180483 | 0.139167 | -5.002483 | 5.66E-07 | 2.43E-06 |
| 5802  | ARL2      | 1222.407539 | -0.696513221 | 0.159258 | -4.3735   | 1.22E-05 | 4.13E-05 |
| 2753  | C3orf21   | 377.2476773 | -0.696786823 | 0.111701 | -6.237961 | 4.43E-10 | 3.16E-09 |
| 12722 | ERAS      | 1.762424134 | -0.696921756 | 0.403943 | -1.725299 | 0.084474 | 0.13015  |
| 8526  | C1orf152  | 15.06583128 | -0.696922286 | 0.218094 | -3.195512 | 0.001396 | 0.003209 |
| 14904 | SAGE1     | 1.115362781 | -0.69749319  | 0.674194 | -1.034559 | 0.300875 | 0.395696 |
| 1863  | POLA2     | 233.9606729 | -0.69787507  | 0.097956 | -7.124361 | 1.05E-12 | 1.10E-11 |
| 6209  | MICAL1    | 766.9680122 | -0.698026175 | 0.167264 | -4.173196 | 3.00E-05 | 9.48E-05 |
| 8078  | C1orf135  | 11.77765893 | -0.698095567 | 0.206571 | -3.379441 | 0.000726 | 0.001762 |
| 5056  | RAD9A     | 225.5754    | -0.698104929 | 0.147164 | -4.743714 | 2.10E-06 | 8.13E-06 |
| 14893 | PTPRQ     | 0.925107216 | -0.698165589 | 0.672203 | -1.038624 | 0.29898  | 0.393494 |
| 9178  | SLC27A5   | 84.33922548 | -0.698236283 | 0.236927 | -2.947055 | 0.003208 | 0.006853 |
| 11613 | KEL       | 3.970561114 | -0.698356792 | 0.336271 | -2.07677  | 0.037823 | 0.063839 |
| 4368  | BOLA2     | 984.7306597 | -0.698485688 | 0.13641  | -5.120497 | 3.05E-07 | 1.37E-06 |
| 6293  | FAM38A    | 2756.202677 | -0.698918219 | 0.169253 | -4.129441 | 3.64E-05 | 0.000113 |
| 5513  | SNX8      | 451.460489  | -0.69895739  | 0.154851 | -4.513755 | 6.37E-06 | 2.26E-05 |
| 5676  | PIR       | 230.8298992 | -0.699204411 | 0.15768  | -4.434322 | 9.24E-06 | 3.19E-05 |
| 7110  | RASSF5    | 628.9014097 | -0.699490108 | 0.185022 | -3.780582 | 0.000156 | 0.000431 |
| 12101 | B3GNT3    | 248.3762888 | -0.699528699 | 0.362733 | -1.928497 | 0.053793 | 0.087134 |
| 4276  | ZSWIM4    | 368.1191669 | -0.699927339 | 0.135426 | -5.16833  | 2.36E-07 | 1.08E-06 |
| 2617  | MOV10     | 1014.929576 | -0.699971252 | 0.110085 | -6.358483 | 2.04E-10 | 1.53E-09 |
| 9532  | CRNA001C  | 12.49925211 | -0.700003189 | 0.24954  | -2.805174 | 0.005029 | 0.010341 |
| 4249  | PKN1      | 3449.101003 | -0.700179808 | 0.135115 | -5.182117 | 2.19E-07 | 1.01E-06 |
| 6922  | SPDYE8P   | 18.58987638 | -0.700184367 | 0.18161  | -3.855437 | 0.000116 | 0.000327 |
| 6069  | PDXK      | 2869.596959 | -0.70020486  | 0.165274 | -4.236629 | 2.27E-05 | 7.33E-05 |
| 16636 | PRDM14    | 0.387402542 | -0.700351414 | 1.299962 | -0.538748 | 0.590061 | 0.695226 |
| 3105  | SDF4      | 3687.646215 | -0.700555073 | 0.117528 | -5.960744 | 2.51E-09 | 1.59E-08 |
| 4602  | SRD5A3    | 577.9432785 | -0.700718787 | 0.140478 | -4.988097 | 6.10E-07 | 2.60E-06 |
| 4952  | RPS27A    | 9557.478129 | -0.700876597 | 0.146154 | -4.795468 | 1.62E-06 | 6.42E-06 |
| 12909 | ADARB2    | 1.986457363 | -0.700883878 | 0.419384 | -1.671223 | 0.094678 | 0.143758 |
| 13699 | HIST1H2AI | 1.219884387 | -0.700901832 | 0.494398 | -1.417687 | 0.156282 | 0.223598 |
| 4451  | SLC39A11  | 608.4934879 | -0.701874148 | 0.138422 | -5.070537 | 3.97E-07 | 1.75E-06 |
| 13907 | PNLDC1    | 1.204035    | -0.702271043 | 0.521004 | -1.347918 | 0.177685 | 0.250435 |
| 7383  | TMSB15B   | 29.69055035 | -0.702356292 | 0.191774 | -3.662426 | 0.00025  | 0.000663 |
| 10410 | FAHD2B    | 100.4768216 | -0.70239811  | 0.280218 | -2.506609 | 0.01219  | 0.022952 |
| 10132 | C5orf58   | 8.515054953 | -0.702681538 | 0.269803 | -2.604429 | 0.009203 | 0.017803 |
| 9634  | FYB       | 1124.531147 | -0.702836579 | 0.253935 | -2.767787 | 0.005644 | 0.011483 |
| 2030  | AP2A1     | 1913.519803 | -0.703486018 | 0.101528 | -6.928958 | 4.24E-12 | 4.09E-11 |
| 2803  | MAZ       | 3300.006348 | -0.703809525 | 0.113692 | -6.190476 | 6.00E-10 | 4.19E-09 |
| 4643  | CARS2     | 897.9863479 | -0.704087106 | 0.14182  | -4.964653 | 6.88E-07 | 2.90E-06 |
| 10355 | NFATC2    | 110.6891041 | -0.704417485 | 0.278925 | -2.525473 | 0.011554 | 0.021871 |
| 7887  | NKX3-1    | 48.94283219 | -0.704423393 | 0.203914 | -3.454508 | 0.000551 | 0.00137  |
| 11517 | SMPDL3B   | 149.1540756 | -0.704519261 | 0.333772 | -2.110782 | 0.034791 | 0.059213 |
| 10494 | GRM6      | 5.805271903 | -0.705030959 | 0.285097 | -2.472952 | 0.0134   | 0.025029 |
| 5013  | HVCN1     | 211.4653714 | -0.705173223 | 0.147983 | -4.765236 | 1.89E-06 | 7.38E-06 |
| 5790  | B9D2      | 205.3744099 | -0.705278372 | 0.161113 | -4.377528 | 1.20E-05 | 4.06E-05 |
| 8722  | CENPK     | 55.63030079 | -0.705407091 | 0.226071 | -3.120284 | 0.001807 | 0.00406  |

|       |           |             |              |          |           |          |          |
|-------|-----------|-------------|--------------|----------|-----------|----------|----------|
| 9534  | FADS2     | 1221.53118  | -0.705471597 | 0.251519 | -2.804848 | 0.005034 | 0.010349 |
| 4633  | FKBP8     | 5336.736026 | -0.70550346  | 0.1419   | -4.971839 | 6.63E-07 | 2.81E-06 |
| 2614  | RALY      | 2617.285396 | -0.705579305 | 0.110899 | -6.362375 | 1.99E-10 | 1.49E-09 |
| 2028  | TBL2      | 1194.543128 | -0.705746125 | 0.101822 | -6.931189 | 4.17E-12 | 4.03E-11 |
| 6077  | RACGAP1   | 442.4417041 | -0.70604011  | 0.166891 | -4.230557 | 2.33E-05 | 7.52E-05 |
| 4887  | FRMD4A    | 1003.727653 | -0.706175341 | 0.146091 | -4.833812 | 1.34E-06 | 5.37E-06 |
| 6615  | ZNF580    | 402.5030014 | -0.706301985 | 0.17756  | -3.977823 | 6.95E-05 | 0.000206 |
| 5213  | SORBS3    | 2309.388285 | -0.706442969 | 0.151174 | -4.673048 | 2.97E-06 | 1.12E-05 |
| 2158  | MKL1      | 1105.067328 | -0.706994569 | 0.103966 | -6.800269 | 1.04E-11 | 9.48E-11 |
| 10612 | TRAT1     | 50.29860738 | -0.707172334 | 0.290686 | -2.432774 | 0.014984 | 0.027676 |
| 7551  | LOC154761 | 117.5637427 | -0.707435349 | 0.196785 | -3.594973 | 0.000324 | 0.000842 |
| 6138  | GAB3      | 178.1156267 | -0.707694211 | 0.168275 | -4.205573 | 2.60E-05 | 8.32E-05 |
| 9017  | HPCAL1    | 5099.755159 | -0.70780045  | 0.23544  | -3.006283 | 0.002645 | 0.005748 |
| 4371  | NCLN      | 1504.758329 | -0.708100641 | 0.13833  | -5.11891  | 3.07E-07 | 1.38E-06 |
| 6944  | IL1R1     | 2114.664167 | -0.70826858  | 0.184103 | -3.847141 | 0.00012  | 0.000337 |
| 6678  | ATAD3A    | 458.9335537 | -0.708393619 | 0.179324 | -3.950364 | 7.80E-05 | 0.000229 |
| 4506  | ZNF428    | 550.1380911 | -0.708981449 | 0.140919 | -5.031143 | 4.88E-07 | 2.12E-06 |
| 8060  | LHX6      | 121.6509113 | -0.708990196 | 0.209236 | -3.388463 | 0.000703 | 0.001709 |
| 9397  | RYR1      | 78.60392614 | -0.709003981 | 0.247905 | -2.859977 | 0.004237 | 0.008837 |
| 11411 | NUDT10    | 13.38497313 | -0.709075444 | 0.330506 | -2.145424 | 0.031919 | 0.054828 |
| 3407  | MRTO4     | 700.1218885 | -0.709334712 | 0.123531 | -5.742159 | 9.35E-09 | 5.38E-08 |
| 8927  | SKAP1     | 358.1185194 | -0.709335497 | 0.23319  | -3.041882 | 0.002351 | 0.005162 |
| 6319  | LHPP      | 365.5355123 | -0.709419548 | 0.172305 | -4.117222 | 3.83E-05 | 0.000119 |
| 4014  | ALDH16A1  | 588.5385111 | -0.709515716 | 0.133118 | -5.32996  | 9.82E-08 | 4.80E-07 |
| 8043  | NID2      | 1312.120915 | -0.710126234 | 0.209162 | -3.395105 | 0.000686 | 0.001672 |
| 12998 | LASS1     | 14.51473326 | -0.710474401 | 0.431796 | -1.645395 | 0.099888 | 0.150632 |
| 2050  | RPS6KA4   | 675.4138142 | -0.710515708 | 0.102951 | -6.901487 | 5.15E-12 | 4.92E-11 |
| 3468  | CPSF4     | 404.9419448 | -0.710604231 | 0.124741 | -5.696627 | 1.22E-08 | 6.91E-08 |
| 10030 | MPP3      | 47.49876951 | -0.71073517  | 0.26901  | -2.642039 | 0.008241 | 0.016105 |
| 11495 | DNAH8     | 2.958470087 | -0.710830629 | 0.335038 | -2.121644 | 0.033868 | 0.05775  |
| 3574  | RPS3      | 17864.65079 | -0.711113285 | 0.126512 | -5.620898 | 1.90E-08 | 1.04E-07 |
| 10020 | ANKRD24   | 61.9389248  | -0.711145639 | 0.268824 | -2.645398 | 0.008159 | 0.015961 |
| 2358  | PRKCSH    | 6576.486821 | -0.711407278 | 0.107768 | -6.601288 | 4.08E-11 | 3.39E-10 |
| 7216  | KRT18     | 10304.17104 | -0.711611023 | 0.19034  | -3.738636 | 0.000185 | 0.000503 |
| 7363  | PLK4      | 72.15433838 | -0.711784615 | 0.193796 | -3.672857 | 0.00024  | 0.000639 |
| 10838 | MPP4      | 1.967566882 | -0.711929228 | 0.303477 | -2.345905 | 0.018981 | 0.034328 |
| 3641  | ZC3H3     | 503.7984296 | -0.712406754 | 0.127724 | -5.577726 | 2.44E-08 | 1.31E-07 |
| 7996  | ZFPM1     | 81.03726396 | -0.712555449 | 0.208904 | -3.410916 | 0.000647 | 0.001587 |
| 8888  | C2orf84   | 5.615393887 | -0.712947048 | 0.233234 | -3.056786 | 0.002237 | 0.004934 |
| 2955  | SNRPB     | 2073.19847  | -0.713231161 | 0.117545 | -6.067743 | 1.30E-09 | 8.60E-09 |
| 12445 | PRO0628   | 1.111492586 | -0.713750181 | 0.391743 | -1.821984 | 0.068457 | 0.107821 |
| 1989  | COPS6     | 2250.176519 | -0.713768344 | 0.10229  | -6.977922 | 3.00E-12 | 2.95E-11 |
| 11954 | SLC25A41  | 2.209069095 | -0.713954522 | 0.361856 | -1.973033 | 0.048492 | 0.079512 |
| 13746 | RHO       | 0.730114926 | -0.714637097 | 0.509267 | -1.403265 | 0.160538 | 0.228917 |
| 8810  | EBF4      | 245.8658869 | -0.714696005 | 0.23176  | -3.083775 | 0.002044 | 0.004547 |
| 11967 | C1orf182  | 1.366356665 | -0.71472636  | 0.362901 | -1.969481 | 0.048898 | 0.080091 |
| 6605  | KRT10     | 369.3211198 | -0.714853378 | 0.17955  | -3.981363 | 6.85E-05 | 0.000203 |

|       |           |             |              |          |           |          |          |
|-------|-----------|-------------|--------------|----------|-----------|----------|----------|
| 6129  | ZFAND2A   | 420.2549906 | -0.715233188 | 0.169972 | -4.207944 | 2.58E-05 | 8.24E-05 |
| 4766  | DONSON    | 183.9552593 | -0.715262425 | 0.145951 | -4.900693 | 9.55E-07 | 3.93E-06 |
| 4581  | PUS1      | 341.5188992 | -0.715338377 | 0.143183 | -4.995976 | 5.85E-07 | 2.50E-06 |
| 4289  | ADCY3     | 1047.610654 | -0.715664216 | 0.138675 | -5.16074  | 2.46E-07 | 1.12E-06 |
| 8697  | CLEC7A    | 285.8217729 | -0.715707015 | 0.228583 | -3.131062 | 0.001742 | 0.003925 |
| 9041  | IL32      | 9104.205866 | -0.715910013 | 0.238729 | -2.998844 | 0.00271  | 0.005876 |
| 11953 | DC1001290 | 2.927175463 | -0.716011537 | 0.362829 | -1.973415 | 0.048448 | 0.079447 |
| 3515  | ADCK4     | 750.6919566 | -0.71614483  | 0.126452 | -5.663359 | 1.48E-08 | 8.28E-08 |
| 4110  | CD81      | 14652.84018 | -0.716233637 | 0.135771 | -5.2753   | 1.33E-07 | 6.32E-07 |
| 10005 | PCDHB8    | 81.48329352 | -0.716333311 | 0.270228 | -2.650844 | 0.008029 | 0.01573  |
| 3279  | ITGAE     | 190.3885027 | -0.716448847 | 0.122876 | -5.830643 | 5.52E-09 | 3.30E-08 |
| 5720  | H1FX      | 1185.405542 | -0.716564205 | 0.162481 | -4.410138 | 1.03E-05 | 3.54E-05 |
| 13906 | TNNT2     | 2.607318367 | -0.716672675 | 0.53167  | -1.347966 | 0.177669 | 0.250433 |
| 4323  | ANKRD39   | 197.236032  | -0.716817537 | 0.139296 | -5.145999 | 2.66E-07 | 1.21E-06 |
| 6518  | DNAJC4    | 828.4007575 | -0.716970589 | 0.178344 | -4.020152 | 5.82E-05 | 0.000175 |
| 4709  | RPP21     | 227.5850854 | -0.717273285 | 0.145538 | -4.928425 | 8.29E-07 | 3.45E-06 |
| 9424  | HOTAIR    | 15.13833125 | -0.717360803 | 0.251726 | -2.849763 | 0.004375 | 0.0091   |
| 1780  | PSMD13    | 2152.220847 | -0.717397533 | 0.099549 | -7.20648  | 5.74E-13 | 6.32E-12 |
| 8653  | SLIT1     | 6.937983254 | -0.717613309 | 0.227844 | -3.149581 | 0.001635 | 0.003704 |
| 10971 | WIPF3     | 39.70520232 | -0.717781096 | 0.312597 | -2.296188 | 0.021665 | 0.038707 |
| 13340 | GAD1      | 124.0993769 | -0.718097029 | 0.468882 | -1.531509 | 0.125644 | 0.184606 |
| 5753  | C9orf167  | 540.0222513 | -0.71826314  | 0.163483 | -4.393516 | 1.12E-05 | 3.80E-05 |
| 10604 | LOC645431 | 16.99751285 | -0.718787307 | 0.295168 | -2.435179 | 0.014884 | 0.027513 |
| 3672  | CAD       | 798.8101017 | -0.718819101 | 0.129411 | -5.554565 | 2.78E-08 | 1.49E-07 |
| 2795  | SLC38A10  | 2939.224758 | -0.719128107 | 0.116043 | -6.197097 | 5.75E-10 | 4.03E-09 |
| 6931  | FKBP2     | 1460.824858 | -0.719138529 | 0.186732 | -3.851175 | 0.000118 | 0.000332 |
| 4777  | SMYD3     | 230.5509052 | -0.719150894 | 0.146885 | -4.896013 | 9.78E-07 | 4.01E-06 |
| 6560  | LOC441208 | 66.1538582  | -0.719570141 | 0.179821 | -4.00158  | 6.29E-05 | 0.000188 |
| 5092  | TRAF5     | 406.9575892 | -0.720656787 | 0.152368 | -4.729712 | 2.25E-06 | 8.65E-06 |
| 10654 | PLXNC1    | 300.1937202 | -0.720734153 | 0.298683 | -2.413041 | 0.01582  | 0.029105 |
| 15570 | GABRA2    | 1.452519317 | -0.720824091 | 0.855475 | -0.842601 | 0.399452 | 0.502868 |
| 9229  | GNLY      | 176.8330681 | -0.721012286 | 0.246231 | -2.928199 | 0.003409 | 0.007241 |
| 10717 | C4orf47   | 77.79603639 | -0.721197617 | 0.301714 | -2.390334 | 0.016833 | 0.030787 |
| 11747 | C8ORFK29  | 3.118631502 | -0.72177649  | 0.354187 | -2.037842 | 0.041566 | 0.069356 |
| 9142  | FBXO27    | 295.0685304 | -0.721838992 | 0.243783 | -2.960988 | 0.003067 | 0.006575 |
| 11877 | DTHD1     | 13.361292   | -0.721921725 | 0.361474 | -1.997162 | 0.045808 | 0.075598 |
| 9825  | MST1R     | 23.38200512 | -0.722370884 | 0.266548 | -2.710101 | 0.006726 | 0.013419 |
| 10630 | AHNAK2    | 3938.025859 | -0.722720235 | 0.298462 | -2.421478 | 0.015458 | 0.028494 |
| 5841  | COTL1     | 3378.076632 | -0.722861463 | 0.166169 | -4.350149 | 1.36E-05 | 4.57E-05 |
| 6400  | ATP8B2    | 638.6265088 | -0.722861572 | 0.177346 | -4.075985 | 4.58E-05 | 0.00014  |
| 1344  | FTSJ1     | 569.1861381 | -0.723022119 | 0.092635 | -7.805065 | 5.95E-15 | 8.67E-14 |
| 4552  | ZNF358    | 1308.61853  | -0.723406247 | 0.144446 | -5.00816  | 5.50E-07 | 2.37E-06 |
| 12682 | SOAT2     | 5.325879954 | -0.723538783 | 0.415027 | -1.743354 | 0.081272 | 0.125612 |
| 13042 | GNGT1     | 13.45355299 | -0.724099063 | 0.443643 | -1.632165 | 0.102645 | 0.154266 |
| 4140  | TBC1D7    | 300.7859828 | -0.724280309 | 0.137719 | -5.2591   | 1.45E-07 | 6.85E-07 |
| 4111  | RPL10     | 17490.2513  | -0.724346936 | 0.13731  | -5.275248 | 1.33E-07 | 6.32E-07 |
| 7953  | FAM182B   | 34.43034692 | -0.724804927 | 0.211571 | -3.425817 | 0.000613 | 0.001511 |



|       |           |             |              |          |           |          |          |
|-------|-----------|-------------|--------------|----------|-----------|----------|----------|
| 3511  | PXN       | 4837.14912  | -0.724886836 | 0.127973 | -5.664373 | 1.48E-08 | 8.24E-08 |
| 12959 | SLC18A1   | 0.900035016 | -0.724946354 | 0.438203 | -1.654361 | 0.098054 | 0.148311 |
| 3121  | GNB2      | 3962.338884 | -0.724971595 | 0.121877 | -5.948365 | 2.71E-09 | 1.70E-08 |
| 8589  | LIN7B     | 35.2682555  | -0.725410391 | 0.228297 | -3.177485 | 0.001486 | 0.00339  |
| 8715  | MNDA      | 361.2516072 | -0.725411743 | 0.232122 | -3.125135 | 0.001777 | 0.003998 |
| 6877  | ADCK5     | 122.7852167 | -0.725484113 | 0.187355 | -3.872253 | 0.000108 | 0.000307 |
| 12668 | LAD1      | 290.5270519 | -0.725798023 | 0.415206 | -1.748042 | 0.080457 | 0.124489 |
| 6689  | IFI27L2   | 465.5032885 | -0.725816389 | 0.183986 | -3.944965 | 7.98E-05 | 0.000234 |
| 3022  | RNF215    | 398.1581036 | -0.72599182  | 0.120645 | -6.017575 | 1.77E-09 | 1.15E-08 |
| 8240  | SLC22A18  | 1097.235037 | -0.726899328 | 0.219257 | -3.315278 | 0.000916 | 0.002178 |
| 12897 | PROM2     | 234.9061177 | -0.726950209 | 0.434368 | -1.67358  | 0.094213 | 0.143175 |
| 11766 | ADORA1    | 154.9563276 | -0.727113115 | 0.357909 | -2.031556 | 0.042199 | 0.070299 |
| 5578  | FAM129A   | 1169.030553 | -0.727291589 | 0.162196 | -4.484032 | 7.32E-06 | 2.57E-05 |
| 15975 | ISX       | 0.598935911 | -0.72748972  | 1.009169 | -0.72088  | 0.470983 | 0.577887 |
| 6283  | C11orf80  | 260.7510661 | -0.727693702 | 0.175826 | -4.138715 | 3.49E-05 | 0.000109 |
| 5882  | FASN      | 1254.403994 | -0.727833259 | 0.168014 | -4.331968 | 1.48E-05 | 4.92E-05 |
| 4590  | MAGED1    | 3461.644478 | -0.727918896 | 0.145816 | -4.992039 | 5.97E-07 | 2.55E-06 |
| 5869  | PPAN      | 412.1378962 | -0.728146938 | 0.167896 | -4.33689  | 1.45E-05 | 4.83E-05 |
| 13103 | FAM58B    | 0.625680514 | -0.728227419 | 0.452416 | -1.609643 | 0.107476 | 0.160775 |
| 2505  | PSMD4     | 2274.512857 | -0.728377195 | 0.11279  | -6.457797 | 1.06E-10 | 8.31E-10 |
| 10906 | PPFIA2    | 12.30413884 | -0.728575941 | 0.314144 | -2.31924  | 0.020382 | 0.036632 |
| 14646 | C1orf194  | 1.181256759 | -0.728805666 | 0.651613 | -1.118464 | 0.263369 | 0.352471 |
| 8512  | NDUFB7    | 1724.947207 | -0.728855987 | 0.227715 | -3.200745 | 0.001371 | 0.003156 |
| 3083  | FTH1      | 50910.95011 | -0.728870561 | 0.121983 | -5.975194 | 2.30E-09 | 1.46E-08 |
| 6695  | THAP7     | 348.1038477 | -0.728989689 | 0.184929 | -3.942007 | 8.08E-05 | 0.000237 |
| 3495  | METTL1    | 456.2062261 | -0.729590407 | 0.128486 | -5.67838  | 1.36E-08 | 7.63E-08 |
| 6396  | C1orf96   | 245.7581936 | -0.729730893 | 0.178979 | -4.077198 | 4.56E-05 | 0.00014  |
| 7260  | P704P     | 16.91982203 | -0.729770549 | 0.196052 | -3.722333 | 0.000197 | 0.000533 |
| 5475  | COL18A1   | 10572.30599 | -0.730159237 | 0.16109  | -4.532628 | 5.83E-06 | 2.09E-05 |
| 3063  | CD63      | 19807.61708 | -0.730222282 | 0.121892 | -5.990749 | 2.09E-09 | 1.34E-08 |
| 8375  | CHST2     | 859.6385571 | -0.730571543 | 0.224169 | -3.259019 | 0.001118 | 0.002616 |
| 4362  | TAZ       | 466.9772371 | -0.730624884 | 0.142562 | -5.124974 | 2.98E-07 | 1.34E-06 |
| 16046 | LOC285401 | 0.419170972 | -0.730676199 | 1.046668 | -0.698098 | 0.485116 | 0.592594 |
| 14298 | SOST      | 2.126691179 | -0.731030179 | 0.594301 | -1.230068 | 0.218672 | 0.299775 |
| 9063  | HLA-DRB5  | 3232.706799 | -0.731149442 | 0.244227 | -2.993728 | 0.002756 | 0.00596  |
| 6278  | LOC80154  | 322.3074314 | -0.731270228 | 0.176624 | -4.140258 | 3.47E-05 | 0.000108 |
| 3393  | IRAK1     | 2192.46949  | -0.73144588  | 0.127153 | -5.7525   | 8.79E-09 | 5.08E-08 |
| 7958  | MMP25     | 59.16961516 | -0.731473879 | 0.213643 | -3.423813 | 0.000617 | 0.001521 |
| 10166 | TRIM9     | 384.6443453 | -0.731567665 | 0.282007 | -2.594145 | 0.009483 | 0.018283 |
| 16655 | MAGEB18   | 0.320379667 | -0.731638119 | 1.372793 | -0.532956 | 0.594064 | 0.699145 |
| 7471  | AOC3      | 1005.350685 | -0.731719383 | 0.201706 | -3.627655 | 0.000286 | 0.00075  |
| 4522  | SOX12     | 749.1698024 | -0.731977863 | 0.145704 | -5.023743 | 5.07E-07 | 2.20E-06 |
| 7531  | HEXIM2    | 169.7316503 | -0.732034368 | 0.203129 | -3.603786 | 0.000314 | 0.000816 |
| 13501 | HILS1     | 1.032875394 | -0.73232858  | 0.491908 | -1.488751 | 0.136553 | 0.19825  |
| 4829  | RPUSD1    | 369.8952977 | -0.732545471 | 0.150218 | -4.876563 | 1.08E-06 | 4.38E-06 |
| 5028  | APRT      | 1882.953482 | -0.732948909 | 0.153961 | -4.760601 | 1.93E-06 | 7.52E-06 |
| 3906  | ETV5      | 546.6425133 | -0.733020426 | 0.135786 | -5.398356 | 6.73E-08 | 3.37E-07 |

|       |           |             |              |          |           |          |          |
|-------|-----------|-------------|--------------|----------|-----------|----------|----------|
| 3989  | LOC374443 | 134.8314195 | -0.733146039 | 0.137056 | -5.349234 | 8.83E-08 | 4.34E-07 |
| 5575  | CCND3     | 1500.770641 | -0.73317856  | 0.163436 | -4.486029 | 7.26E-06 | 2.55E-05 |
| 1591  | C12orf32  | 553.4135173 | -0.733227426 | 0.098652 | -7.432475 | 1.07E-13 | 1.31E-12 |
| 11428 | CECR7     | 13.39022959 | -0.73348835  | 0.342739 | -2.140076 | 0.032349 | 0.055483 |
| 4797  | DGKZ      | 1067.106948 | -0.73397699  | 0.15015  | -4.888298 | 1.02E-06 | 4.16E-06 |
| 12513 | SCARNA6   | 2.270487528 | -0.734135607 | 0.407885 | -1.799861 | 0.071883 | 0.1126   |
| 7284  | RAD51AP1  | 92.63969834 | -0.734221639 | 0.198103 | -3.706264 | 0.00021  | 0.000566 |
| 9002  | RDH13     | 497.4302492 | -0.734339663 | 0.243845 | -3.011503 | 0.0026   | 0.00566  |
| 9458  | ZGLP1     | 22.95157959 | -0.73448725  | 0.259099 | -2.834771 | 0.004586 | 0.009504 |
| 4710  | VPS28     | 2031.47578  | -0.734635344 | 0.149062 | -4.928378 | 8.29E-07 | 3.45E-06 |
| 6587  | LOC441204 | 120.1111343 | -0.734655394 | 0.184171 | -3.988977 | 6.64E-05 | 0.000197 |
| 11129 | NKD1      | 8.732691305 | -0.734690758 | 0.327558 | -2.242934 | 0.024901 | 0.043857 |
| 7273  | RHGAP11   | 185.9668112 | -0.734772481 | 0.197887 | -3.713091 | 0.000205 | 0.000552 |
| 1688  | CHFR      | 459.5858297 | -0.735128202 | 0.100527 | -7.312767 | 2.62E-13 | 3.04E-12 |
| 780   | YBX1      | 6666.586776 | -0.735182713 | 0.083475 | -8.807179 | 1.28E-18 | 3.22E-17 |
| 8211  | P2RX7     | 177.2148298 | -0.735462893 | 0.221057 | -3.327021 | 0.000878 | 0.002095 |
| 13157 | FST       | 52.63581165 | -0.73552716  | 0.461982 | -1.592111 | 0.11136  | 0.165901 |
| 7070  | LAMA4     | 3917.008164 | -0.735804828 | 0.193873 | -3.795287 | 0.000147 | 0.000409 |
| 8488  | SLC16A6   | 68.27093552 | -0.735828452 | 0.229094 | -3.211901 | 0.001319 | 0.003045 |
| 8083  | GCHFR     | 304.2734667 | -0.736009415 | 0.217898 | -3.377772 | 0.000731 | 0.001772 |
| 2952  | PABPC3    | 162.0638113 | -0.736100841 | 0.121275 | -6.069696 | 1.28E-09 | 8.51E-09 |
| 5388  | AGRN      | 9814.100579 | -0.736168596 | 0.160947 | -4.57399  | 4.79E-06 | 1.74E-05 |
| 3308  | PLSCR3    | 750.4105649 | -0.736564035 | 0.126755 | -5.810905 | 6.21E-09 | 3.68E-08 |
| 8471  | DIAPH3    | 88.5092136  | -0.737097034 | 0.228984 | -3.218986 | 0.001286 | 0.002977 |
| 5678  | CBX8      | 110.8029457 | -0.73714145  | 0.166301 | -4.432563 | 9.31E-06 | 3.21E-05 |
| 5823  | MEM229E   | 199.1340869 | -0.737523684 | 0.169095 | -4.361581 | 1.29E-05 | 4.35E-05 |
| 8483  | MYO15A    | 18.50507762 | -0.737540876 | 0.2295   | -3.213684 | 0.00131  | 0.003028 |
| 10513 | EPPK1     | 264.2087841 | -0.7376933   | 0.298937 | -2.467719 | 0.013598 | 0.025352 |
| 3238  | SNRPF     | 640.3262551 | -0.738113612 | 0.125923 | -5.86162  | 4.58E-09 | 2.77E-08 |
| 8154  | SIRPB1    | 338.5082593 | -0.738189606 | 0.220426 | -3.348929 | 0.000811 | 0.00195  |
| 16491 | GSX2      | 0.350750179 | -0.738366591 | 1.284349 | -0.574896 | 0.565362 | 0.671982 |
| 8875  | TNFRSF4   | 155.8512359 | -0.738874939 | 0.241275 | -3.062382 | 0.002196 | 0.00485  |
| 3178  | TRAF7     | 1502.43359  | -0.738878306 | 0.125309 | -5.896435 | 3.71E-09 | 2.29E-08 |
| 6907  | CNIH3     | 33.03576168 | -0.73915805  | 0.191471 | -3.860426 | 0.000113 | 0.000321 |
| 6267  | S100A13   | 1756.108965 | -0.739256645 | 0.178193 | -4.148638 | 3.34E-05 | 0.000105 |
| 12265 | DMKN      | 329.5019133 | -0.73971226  | 0.393788 | -1.878451 | 0.06032  | 0.096398 |
| 10482 | IL17D     | 7.675363347 | -0.739847495 | 0.298478 | -2.478735 | 0.013185 | 0.024655 |
| 11780 | HIST2H3C  | 1.090978475 | -0.739946783 | 0.364825 | -2.028224 | 0.042537 | 0.070779 |
| 11828 | KCNK3     | 2030.312272 | -0.740023875 | 0.367769 | -2.012195 | 0.044199 | 0.073246 |
| 4349  | EXOSC4    | 284.5810283 | -0.740332533 | 0.144257 | -5.132023 | 2.87E-07 | 1.29E-06 |
| 4155  | EEF1G     | 18339.58235 | -0.740382996 | 0.141065 | -5.248534 | 1.53E-07 | 7.23E-07 |
| 6351  | RPL19P12  | 69.48735236 | -0.740441947 | 0.180603 | -4.099838 | 4.13E-05 | 0.000128 |
| 12666 | RPS28     | 562.9111411 | -0.740517449 | 0.422879 | -1.751131 | 0.079923 | 0.123684 |
| 3955  | RPS15A    | 10381.31885 | -0.740598574 | 0.137833 | -5.373166 | 7.74E-08 | 3.83E-07 |
| 13054 | CRYBB3    | 9.345862472 | -0.740787073 | 0.454808 | -1.628789 | 0.103358 | 0.155195 |
| 4354  | IRF3      | 949.6639096 | -0.740874576 | 0.144449 | -5.128968 | 2.91E-07 | 1.31E-06 |
| 7895  | FDXR      | 547.9823322 | -0.740997396 | 0.214731 | -3.450824 | 0.000559 | 0.001388 |

|       |           |             |              |          |           |          |          |
|-------|-----------|-------------|--------------|----------|-----------|----------|----------|
| 6411  | NOMO2     | 1931.340535 | -0.741009267 | 0.181998 | -4.071529 | 4.67E-05 | 0.000143 |
| 1952  | RFC4      | 237.8515208 | -0.741255779 | 0.105377 | -7.034324 | 2.00E-12 | 2.01E-11 |
| 13030 | CALCR     | 213.8902399 | -0.742013341 | 0.4539   | -1.634751 | 0.102101 | 0.153591 |
| 9083  | NT5E      | 987.381351  | -0.742360296 | 0.248693 | -2.985042 | 0.002835 | 0.006119 |
| 9831  | CLEC5A    | 113.5077584 | -0.742871965 | 0.274199 | -2.709243 | 0.006744 | 0.013446 |
| 5452  | FAM195B   | 1038.156587 | -0.743142507 | 0.163641 | -4.5413   | 5.59E-06 | 2.01E-05 |
| 16712 | FAM48B1   | 0.254709611 | -0.743153356 | 1.439277 | -0.516338 | 0.605618 | 0.710311 |
| 16553 | FGF10     | 0.233166366 | -0.743153431 | 1.330121 | -0.558711 | 0.576359 | 0.682487 |
| 15464 | PGLYRP4   | 0.271573051 | -0.743153461 | 0.852776 | -0.871452 | 0.383507 | 0.486105 |
| 15138 | HIST1H2AI | 0.248929233 | -0.743153471 | 0.771408 | -0.963373 | 0.33536  | 0.434232 |
| 16559 | NHEG1     | 0.209441509 | -0.743153481 | 1.334886 | -0.556717 | 0.577721 | 0.683852 |
| 15922 | TMEM229A  | 0.215639432 | -0.743153497 | 1.010462 | -0.735459 | 0.46206  | 0.568825 |
| 15727 | HIST1H3F  | 0.197588653 | -0.743153525 | 0.933687 | -0.795934 | 0.42607  | 0.531008 |
| 16369 | PRDM9     | 0.195212887 | -0.74315353  | 1.222064 | -0.608113 | 0.543112 | 0.650348 |
| 16533 | RXFP3     | 0.196203219 | -0.743153533 | 1.318773 | -0.563519 | 0.573082 | 0.679427 |
| 16192 | CLCA3P    | 0.176660565 | -0.743153566 | 1.133437 | -0.655664 | 0.51204  | 0.619843 |
| 16208 | CA6       | 0.175309335 | -0.743153566 | 1.137899 | -0.653093 | 0.513696 | 0.621215 |
| 16688 | IGFL3     | 0.17417693  | -0.743153594 | 1.426794 | -0.520856 | 0.602467 | 0.70759  |
| 16693 | C1orf129  | 0.173505593 | -0.743153594 | 1.428606 | -0.520195 | 0.602928 | 0.707961 |
| 16697 | HMX2      | 0.172116996 | -0.743153594 | 1.429661 | -0.519811 | 0.603195 | 0.708105 |
| 16530 | C1orf158  | 0.153801779 | -0.743153632 | 1.316078 | -0.564673 | 0.572296 | 0.678619 |
| 17153 | FLJ46321  | 0.170522041 | -0.743153648 | 1.869901 | -0.397429 | 0.691051 | 0.789675 |
| 16703 | TSPAN16   | 0.150711685 | -0.743153654 | 1.435216 | -0.517799 | 0.604598 | 0.709497 |
| 16829 | TMEM190   | 0.182640433 | -0.743153674 | 1.53603  | -0.483815 | 0.628517 | 0.732044 |
| 17349 | GPR78     | 0.151287739 | -0.74315381  | 2.101589 | -0.353615 | 0.723627 | 0.817558 |
| 17647 | MYL10     | 0.163292803 | -0.743154185 | 2.650898 | -0.280341 | 0.779216 | 0.865497 |
| 17681 | PSG11     | 0.136096622 | -0.743154221 | 2.721189 | -0.273099 | 0.784777 | 0.869997 |
| 17758 | SPRYD5    | 0.134275147 | -0.743154325 | 2.91407  | -0.255023 | 0.798705 | 0.881599 |
| 16437 | CFHR4     | 0.294808615 | -0.743214826 | 1.254887 | -0.592257 | 0.553679 | 0.660258 |
| 11062 | ERAP2     | 2136.233724 | -0.743415254 | 0.327621 | -2.269131 | 0.02326  | 0.041216 |
| 14625 | LOC400891 | 0.750486496 | -0.743460001 | 0.66068  | -1.125294 | 0.260464 | 0.349085 |
| 9837  | SOCS1     | 221.9920221 | -0.743658156 | 0.274662 | -2.707541 | 0.006778 | 0.013506 |
| 7608  | C10orf10  | 8482.020914 | -0.743669114 | 0.207863 | -3.577687 | 0.000347 | 0.000893 |
| 12904 | CALN1     | 1.026915622 | -0.743870171 | 0.444838 | -1.672227 | 0.09448  | 0.143513 |
| 6742  | ASPSCR1   | 384.718886  | -0.743975687 | 0.189617 | -3.92356  | 8.72E-05 | 0.000254 |
| 8047  | PYGL      | 1740.467143 | -0.744160331 | 0.219278 | -3.393687 | 0.00069  | 0.00168  |
| 1142  | PDAP1     | 2102.956471 | -0.744236771 | 0.091855 | -8.102302 | 5.39E-16 | 9.26E-15 |
| 7009  | RNF39     | 7.400392888 | -0.744362965 | 0.194881 | -3.819585 | 0.000134 | 0.000374 |
| 13425 | ACCN1     | 20.85383632 | -0.744398072 | 0.493968 | -1.506976 | 0.131817 | 0.192458 |
| 12232 | CLEC17A   | 4.856932887 | -0.744621124 | 0.394526 | -1.88738  | 0.059109 | 0.094719 |
| 8447  | FLJ39739  | 3.676910353 | -0.744646145 | 0.230616 | -3.228949 | 0.001242 | 0.002883 |
| 4908  | RNF181    | 1693.955758 | -0.744864818 | 0.154445 | -4.82284  | 1.42E-06 | 5.65E-06 |
| 5540  | OAS3      | 1445.460973 | -0.744973698 | 0.165448 | -4.502756 | 6.71E-06 | 2.37E-05 |
| 1790  | VASP      | 1880.644886 | -0.74515066  | 0.10353  | -7.197416 | 6.14E-13 | 6.72E-12 |
| 1700  | CPNE1     | 1909.30155  | -0.745182729 | 0.102173 | -7.293379 | 3.02E-13 | 3.48E-12 |
| 6684  | GAS5      | 1994.590158 | -0.745428154 | 0.188859 | -3.947009 | 7.91E-05 | 0.000232 |
| 9147  | ITPR3     | 2067.450673 | -0.7460482   | 0.252104 | -2.959283 | 0.003084 | 0.006608 |

|       |           |             |              |          |           |          |          |
|-------|-----------|-------------|--------------|----------|-----------|----------|----------|
| 4036  | NR2C2AP   | 340.3529422 | -0.746245364 | 0.140427 | -5.314118 | 1.07E-07 | 5.21E-07 |
| 10559 | GPC2      | 10.16293294 | -0.74664176  | 0.304853 | -2.449188 | 0.014318 | 0.026579 |
| 9563  | PCDP1     | 142.8684704 | -0.746800272 | 0.267146 | -2.795473 | 0.005182 | 0.010622 |
| 3180  | MRPL36    | 368.8494151 | -0.746860749 | 0.126706 | -5.894442 | 3.76E-09 | 2.32E-08 |
| 3659  | MEX3D     | 282.3440304 | -0.746862171 | 0.134205 | -5.565073 | 2.62E-08 | 1.40E-07 |
| 9413  | EGFL7     | 1365.120862 | -0.747213345 | 0.26196  | -2.852397 | 0.004339 | 0.009035 |
| 11208 | PRSS30P   | 4.080471214 | -0.748216002 | 0.337219 | -2.218784 | 0.026501 | 0.046347 |
| 3966  | MRPS17    | 251.9760193 | -0.748282292 | 0.139494 | -5.364251 | 8.13E-08 | 4.02E-07 |
| 6577  | 43893     | 92.14638857 | -0.748852113 | 0.187605 | -3.991648 | 6.56E-05 | 0.000196 |
| 9040  | C8orf48   | 24.80014194 | -0.74906652  | 0.249789 | -2.998798 | 0.00271  | 0.005876 |
| 5142  | STRA13    | 370.4121485 | -0.749453191 | 0.159222 | -4.706979 | 2.51E-06 | 9.58E-06 |
| 6549  | ITPRIPL1  | 29.31558231 | -0.749585305 | 0.187114 | -4.006034 | 6.17E-05 | 0.000185 |
| 2209  | COX19     | 279.7590025 | -0.74959987  | 0.111103 | -6.746894 | 1.51E-11 | 1.34E-10 |
| 8827  | NCS1      | 582.6146014 | -0.749635372 | 0.243338 | -3.080637 | 0.002066 | 0.004587 |
| 7676  | OC1002872 | 10.84971023 | -0.750612131 | 0.211557 | -3.548039 | 0.000388 | 0.000991 |
| 14319 | DMRTA2    | 0.450703594 | -0.750865135 | 0.613183 | -1.224537 | 0.22075  | 0.30218  |
| 3831  | TFPT      | 218.1162268 | -0.750895182 | 0.137903 | -5.445114 | 5.18E-08 | 2.65E-07 |
| 2912  | TMEM79    | 118.1180296 | -0.750958718 | 0.12305  | -6.102858 | 1.04E-09 | 7.01E-09 |
| 3586  | STOML1    | 431.4974059 | -0.751035345 | 0.133802 | -5.613023 | 1.99E-08 | 1.09E-07 |
| 3567  | TALDO1    | 2635.528639 | -0.751434176 | 0.133567 | -5.625893 | 1.85E-08 | 1.01E-07 |
| 13031 | CYP7A1    | 0.746119629 | -0.751621613 | 0.459828 | -1.634571 | 0.102139 | 0.153636 |
| 11322 | ACTN3     | 1.127939203 | -0.751904085 | 0.34603  | -2.172945 | 0.029784 | 0.051564 |
| 8611  | ZFPM2     | 103.8000968 | -0.752252039 | 0.237291 | -3.170168 | 0.001524 | 0.003468 |
| 4583  | TMEM120A  | 1102.845015 | -0.752696211 | 0.150717 | -4.994109 | 5.91E-07 | 2.53E-06 |
| 12061 | SLFN14    | 1.4932407   | -0.752762458 | 0.387812 | -1.941049 | 0.052252 | 0.084918 |
| 5207  | RAB24     | 899.1566498 | -0.754023567 | 0.161305 | -4.67451  | 2.95E-06 | 1.11E-05 |
| 10803 | HSPB9     | 1.967345025 | -0.754029412 | 0.319437 | -2.360495 | 0.018251 | 0.033114 |
| 14264 | LOC340074 | 0.433059737 | -0.754185422 | 0.608452 | -1.239515 | 0.215155 | 0.295657 |
| 8911  | NINJ2     | 54.42320877 | -0.754885863 | 0.247694 | -3.047658 | 0.002306 | 0.005073 |
| 14885 | GOLGA6L6  | 0.397398355 | -0.754943687 | 0.725381 | -1.040755 | 0.297989 | 0.392401 |
| 4270  | RPS7      | 7173.660755 | -0.755416988 | 0.146071 | -5.17156  | 2.32E-07 | 1.07E-06 |
| 4753  | FAM50A    | 1419.758925 | -0.755554404 | 0.153964 | -4.907346 | 9.23E-07 | 3.81E-06 |
| 7699  | RHOD      | 235.3595373 | -0.755586733 | 0.213429 | -3.540225 | 0.0004   | 0.001018 |
| 8424  | EMB       | 608.3042841 | -0.75573047  | 0.233139 | -3.241545 | 0.001189 | 0.002766 |
| 5502  | UGDH      | 1342.684012 | -0.755844866 | 0.167178 | -4.521196 | 6.15E-06 | 2.19E-05 |
| 4697  | C10orf54  | 1606.499125 | -0.755878043 | 0.153273 | -4.93158  | 8.16E-07 | 3.40E-06 |
| 5427  | YPEL3     | 1035.02584  | -0.755912172 | 0.165979 | -4.554265 | 5.26E-06 | 1.90E-05 |
| 2901  | LIG1      | 505.2091868 | -0.755951115 | 0.123694 | -6.11147  | 9.87E-10 | 6.67E-09 |
| 6831  | ST20      | 80.55468532 | -0.756377517 | 0.194555 | -3.887725 | 0.000101 | 0.00029  |
| 3439  | TRAPPC1   | 1485.19601  | -0.75658158  | 0.132349 | -5.71656  | 1.09E-08 | 6.20E-08 |
| 5585  | IL16      | 550.5700202 | -0.756914916 | 0.168915 | -4.481048 | 7.43E-06 | 2.61E-05 |
| 4524  | NOC4L     | 317.2829173 | -0.756935722 | 0.150721 | -5.022113 | 5.11E-07 | 2.21E-06 |
| 7580  | C14orf139 | 78.09880795 | -0.757542148 | 0.211271 | -3.585645 | 0.000336 | 0.000869 |
| 8663  | NDN       | 533.4065339 | -0.757606924 | 0.240792 | -3.146315 | 0.001653 | 0.003741 |
| 2110  | MRPL17    | 1322.709849 | -0.757686444 | 0.110784 | -6.83932  | 7.96E-12 | 7.39E-11 |
| 4521  | ZMYND17   | 97.98396165 | -0.757708171 | 0.150823 | -5.023814 | 5.07E-07 | 2.20E-06 |
| 9159  | B3GALT2   | 12.50049309 | -0.757816418 | 0.256381 | -2.955816 | 0.003118 | 0.006674 |

|       |          |             |              |          |           |          |          |
|-------|----------|-------------|--------------|----------|-----------|----------|----------|
| 11304 | FAM7A2   | 2.794616441 | -0.757953469 | 0.348096 | -2.177424 | 0.029449 | 0.051064 |
| 3916  | B3GALT6  | 489.2934973 | -0.758013768 | 0.140553 | -5.393091 | 6.93E-08 | 3.47E-07 |
| 3773  | DUS1L    | 1175.901902 | -0.758154429 | 0.138088 | -5.490377 | 4.01E-08 | 2.08E-07 |
| 10261 | EEF1DP3  | 2.005097307 | -0.758507849 | 0.296054 | -2.56206  | 0.010405 | 0.019877 |
| 5879  | INO80B   | 365.7029158 | -0.759073407 | 0.175152 | -4.333808 | 1.47E-05 | 4.89E-05 |
| 7606  | CAV1     | 6592.48138  | -0.759532759 | 0.212274 | -3.57807  | 0.000346 | 0.000892 |
| 1858  | TMEM39B  | 262.5975833 | -0.759549855 | 0.106564 | -7.127668 | 1.02E-12 | 1.08E-11 |
| 8235  | HLA-DQB1 | 4683.778708 | -0.75955745  | 0.22896  | -3.317428 | 0.000909 | 0.002162 |
| 13844 | RIMS2    | 10.50798007 | -0.759615207 | 0.554321 | -1.370352 | 0.170577 | 0.241511 |
| 10412 | FAM167A  | 62.0401995  | -0.760000335 | 0.303244 | -2.506235 | 0.012202 | 0.02297  |
| 12048 | KIF25    | 3.539733568 | -0.760198584 | 0.390862 | -1.944929 | 0.051783 | 0.084247 |
| 4075  | TRIP6    | 1646.514509 | -0.760253545 | 0.14362  | -5.293496 | 1.20E-07 | 5.77E-07 |
| 8656  | CRISPLD2 | 1542.874055 | -0.76029625  | 0.241507 | -3.148131 | 0.001643 | 0.003721 |
| 11313 | GYS2     | 5.620691447 | -0.760337625 | 0.349591 | -2.174937 | 0.029635 | 0.051346 |
| 13865 | C8orf34  | 13.52381461 | -0.760339391 | 0.557961 | -1.362711 | 0.172974 | 0.244533 |
| 8703  | GPR114   | 38.61427889 | -0.760348906 | 0.243079 | -3.127989 | 0.00176  | 0.003964 |
| 7267  | ADAMTS7  | 244.3661308 | -0.760626037 | 0.204649 | -3.716736 | 0.000202 | 0.000544 |
| 3354  | ATP5G2   | 6434.964136 | -0.760804782 | 0.131695 | -5.777028 | 7.60E-09 | 4.44E-08 |
| 7680  | TMEM191A | 20.30532824 | -0.760879796 | 0.214493 | -3.547339 | 0.000389 | 0.000993 |
| 11547 | EMR3     | 6.166575217 | -0.761127469 | 0.362616 | -2.098989 | 0.035818 | 0.060801 |
| 8907  | OR51E2   | 59.56731135 | -0.761272552 | 0.249705 | -3.048691 | 0.002298 | 0.005058 |
| 2126  | CSRP1    | 3698.391892 | -0.761516111 | 0.111588 | -6.824377 | 8.83E-12 | 8.14E-11 |
| 657   | ACTB     | 94511.60027 | -0.761673172 | 0.083196 | -9.155213 | 5.43E-20 | 1.62E-18 |
| 6475  | ISYNA1   | 945.1153028 | -0.76221639  | 0.188768 | -4.037841 | 5.39E-05 | 0.000163 |
| 7808  | PLEKHF1  | 170.0288071 | -0.762237257 | 0.21787  | -3.498593 | 0.000468 | 0.001174 |
| 5343  | CHCHD6   | 126.5135016 | -0.762503899 | 0.165843 | -4.597745 | 4.27E-06 | 1.57E-05 |
| 1724  | MGAT1    | 4896.800572 | -0.762752817 | 0.10489  | -7.271923 | 3.54E-13 | 4.03E-12 |
| 9666  | IL1B     | 136.9282871 | -0.76275795  | 0.276461 | -2.759004 | 0.005798 | 0.011757 |
| 13390 | PCDH11X  | 4.411699176 | -0.763117221 | 0.504071 | -1.513909 | 0.130049 | 0.190373 |
| 4316  | RAB31    | 2081.931843 | -0.76334762  | 0.148301 | -5.147289 | 2.64E-07 | 1.20E-06 |
| 2372  | FAM189B  | 642.2405551 | -0.763428468 | 0.115907 | -6.586561 | 4.50E-11 | 3.72E-10 |
| 8384  | CHST15   | 2202.049721 | -0.763920673 | 0.234495 | -3.257723 | 0.001123 | 0.002626 |
| 6031  | GRIN3A   | 27.44066494 | -0.764443828 | 0.17979  | -4.251868 | 2.12E-05 | 6.89E-05 |
| 6263  | UBASH3B  | 226.510743  | -0.764940537 | 0.184316 | -4.150163 | 3.32E-05 | 0.000104 |
| 11680 | WDR38    | 1.259964201 | -0.765020588 | 0.372119 | -2.055852 | 0.039797 | 0.066786 |
| 10586 | SLC22A3  | 265.2277184 | -0.765371797 | 0.313668 | -2.440072 | 0.014684 | 0.027189 |
| 10895 | SYT1     | 18.80395604 | -0.765379728 | 0.329611 | -2.322069 | 0.020229 | 0.036394 |
| 11269 | AMAC1L2  | 1.361882501 | -0.765445894 | 0.349112 | -2.192553 | 0.02834  | 0.049293 |
| 3429  | BCL9L    | 1745.244772 | -0.765526607 | 0.133769 | -5.722766 | 1.05E-08 | 5.99E-08 |
| 5949  | CTSB     | 31266.87002 | -0.765571737 | 0.178413 | -4.291011 | 1.78E-05 | 5.86E-05 |
| 11043 | C6orf105 | 51.22447529 | -0.766381104 | 0.336789 | -2.275552 | 0.022873 | 0.040599 |
| 5075  | TANC2    | 1059.298408 | -0.766672784 | 0.161953 | -4.733916 | 2.20E-06 | 8.51E-06 |
| 6372  | TBC1D16  | 667.0176794 | -0.766826545 | 0.187381 | -4.092339 | 4.27E-05 | 0.000131 |
| 6021  | TSPAN4   | 1798.287027 | -0.766942108 | 0.18023  | -4.255343 | 2.09E-05 | 6.80E-05 |
| 8893  | HPSE     | 90.89832174 | -0.767013752 | 0.251077 | -3.054893 | 0.002251 | 0.004962 |
| 10300 | FOS      | 7945.04583  | -0.767067231 | 0.301335 | -2.545563 | 0.01091  | 0.020762 |
| 5346  | NT5C     | 546.7278186 | -0.767181022 | 0.166948 | -4.59533  | 4.32E-06 | 1.58E-05 |

|       |          |             |              |          |           |          |          |
|-------|----------|-------------|--------------|----------|-----------|----------|----------|
| 4309  | PNKD     | 1526.016835 | -0.767263527 | 0.148925 | -5.152011 | 2.58E-07 | 1.17E-06 |
| 2284  | CDCA4    | 162.3502239 | -0.767415426 | 0.115092 | -6.667854 | 2.60E-11 | 2.23E-10 |
| 8534  | COL15A1  | 2723.197789 | -0.767519254 | 0.240303 | -3.193959 | 0.001403 | 0.003223 |
| 6081  | RASSF2   | 990.0915585 | -0.767974496 | 0.181604 | -4.228849 | 2.35E-05 | 7.57E-05 |
| 5041  | KCNJ14   | 31.07322326 | -0.768281107 | 0.161647 | -4.752839 | 2.01E-06 | 7.80E-06 |
| 3992  | PCNXL2   | 297.1557235 | -0.768356527 | 0.143761 | -5.344675 | 9.06E-08 | 4.45E-07 |
| 4802  | TMEM134  | 607.8528951 | -0.768599047 | 0.157307 | -4.88599  | 1.03E-06 | 4.20E-06 |
| 1951  | FAM100B  | 519.8311779 | -0.768690842 | 0.109269 | -7.034823 | 2.00E-12 | 2.00E-11 |
| 9092  | GPR1     | 33.36535456 | -0.768755731 | 0.25787  | -2.981177 | 0.002871 | 0.00619  |
| 8028  | SLC45A1  | 77.1408588  | -0.769025205 | 0.226182 | -3.40003  | 0.000674 | 0.001645 |
| 4558  | LYN      | 989.7579791 | -0.76907796  | 0.153663 | -5.004957 | 5.59E-07 | 2.40E-06 |
| 5465  | PORCN    | 156.7734462 | -0.769213495 | 0.169592 | -4.535662 | 5.74E-06 | 2.06E-05 |
| 6217  | LAMP3    | 146.6170313 | -0.769306912 | 0.184478 | -4.170193 | 3.04E-05 | 9.60E-05 |
| 10107 | KLHDC7B  | 64.30813298 | -0.769316441 | 0.29423  | -2.61468  | 0.008931 | 0.017321 |
| 3384  | C8orf30A | 480.4215434 | -0.769375221 | 0.133627 | -5.757637 | 8.53E-09 | 4.94E-08 |
| 12263 | MPO      | 6.628731378 | -0.769410083 | 0.409575 | -1.878559 | 0.060305 | 0.096386 |
| 4608  | C7orf59  | 1312.925781 | -0.76981864  | 0.154416 | -4.985343 | 6.19E-07 | 2.63E-06 |
| 2927  | DDAH2    | 1105.685025 | -0.770074286 | 0.126395 | -6.092583 | 1.11E-09 | 7.44E-09 |
| 3235  | SYNGR2   | 3492.860602 | -0.770557588 | 0.131426 | -5.863039 | 4.54E-09 | 2.75E-08 |
| 14690 | MMP20    | 1.003821819 | -0.770665201 | 0.697895 | -1.10427  | 0.269476 | 0.359564 |
| 6763  | PLK3     | 326.9972889 | -0.770694963 | 0.196968 | -3.912792 | 9.12E-05 | 0.000264 |
| 2582  | ETHE1    | 391.9472773 | -0.771140126 | 0.12054  | -6.397396 | 1.58E-10 | 1.20E-09 |
| 6822  | CRNA0018 | 54.08188788 | -0.771738115 | 0.198377 | -3.890252 | 0.0001   | 0.000288 |
| 4049  | FHOD1    | 726.2452647 | -0.771839655 | 0.145433 | -5.307202 | 1.11E-07 | 5.39E-07 |
| 9751  | LOC84856 | 259.5701577 | -0.772108882 | 0.282579 | -2.732369 | 0.006288 | 0.01264  |
| 3689  | SAMD1    | 185.1741717 | -0.772118519 | 0.139378 | -5.539726 | 3.03E-08 | 1.61E-07 |
| 5018  | GLTSCR2  | 6504.309127 | -0.772121386 | 0.162103 | -4.763157 | 1.91E-06 | 7.44E-06 |
| 10407 | GPR174   | 22.66570629 | -0.772175287 | 0.308004 | -2.507026 | 0.012175 | 0.022929 |
| 7311  | PAPSS2   | 1159.709175 | -0.772257226 | 0.208932 | -3.696217 | 0.000219 | 0.000587 |
| 2541  | POLE     | 480.647575  | -0.772394924 | 0.120133 | -6.429511 | 1.28E-10 | 9.87E-10 |
| 8458  | ABCA7    | 289.1521102 | -0.773000385 | 0.239683 | -3.225091 | 0.001259 | 0.002918 |
| 6413  | HLA-DRB1 | 9477.090906 | -0.773384434 | 0.189974 | -4.070997 | 4.68E-05 | 0.000143 |
| 3550  | SIX5     | 340.4493718 | -0.773524538 | 0.137243 | -5.636172 | 1.74E-08 | 9.60E-08 |
| 4835  | RPS10    | 5634.591656 | -0.773665424 | 0.158766 | -4.872995 | 1.10E-06 | 4.46E-06 |
| 5995  | BIN2     | 371.2591255 | -0.773759533 | 0.181206 | -4.270059 | 1.95E-05 | 6.39E-05 |
| 3691  | SIRT7    | 266.7976169 | -0.773933648 | 0.139716 | -5.539315 | 3.04E-08 | 1.61E-07 |
| 8508  | CPNE5    | 178.058395  | -0.774062648 | 0.241711 | -3.202432 | 0.001363 | 0.003139 |
| 9181  | FOLH1    | 759.395987  | -0.774259482 | 0.262788 | -2.946327 | 0.003216 | 0.006865 |
| 3562  | RUVBL2   | 1573.332701 | -0.774319541 | 0.137598 | -5.627388 | 1.83E-08 | 1.01E-07 |
| 12791 | ZACN     | 0.601945992 | -0.77435597  | 0.453618 | -1.707065 | 0.08781  | 0.134561 |
| 3342  | RPL41    | 17157.66896 | -0.77476551  | 0.133775 | -5.791537 | 6.97E-09 | 4.09E-08 |
| 6240  | MARCKS   | 4517.034976 | -0.775151194 | 0.186387 | -4.158823 | 3.20E-05 | 0.0001   |
| 10248 | SLC5A9   | 456.7433275 | -0.775613155 | 0.302287 | -2.565817 | 0.010293 | 0.019688 |
| 4902  | GSDMD    | 1753.309461 | -0.776121696 | 0.160839 | -4.825449 | 1.40E-06 | 5.59E-06 |
| 2440  | CSK      | 1213.185002 | -0.77621118  | 0.11906  | -6.519481 | 7.06E-11 | 5.67E-10 |
| 4953  | RHBDD3   | 249.0136174 | -0.776564796 | 0.161959 | -4.79481  | 1.63E-06 | 6.44E-06 |
| 6691  | C16orf75 | 115.5563089 | -0.776798342 | 0.196956 | -3.944019 | 8.01E-05 | 0.000235 |

|       |          |             |              |          |           |          |          |
|-------|----------|-------------|--------------|----------|-----------|----------|----------|
| 3330  | NCKAP5L  | 559.5206995 | -0.777047293 | 0.134062 | -5.796173 | 6.78E-09 | 3.99E-08 |
| 1220  | CFL1     | 12620.2213  | -0.777112735 | 0.09719  | -7.995775 | 1.29E-15 | 2.07E-14 |
| 9885  | MGC16703 | 4.430868063 | -0.777136302 | 0.288667 | -2.692157 | 0.007099 | 0.014077 |
| 5977  | CASP1    | 565.231944  | -0.777376647 | 0.181672 | -4.279001 | 1.88E-05 | 6.16E-05 |
| 3587  | ZMYND8   | 1013.737582 | -0.777443218 | 0.138519 | -5.612558 | 1.99E-08 | 1.09E-07 |
| 6455  | TIMP2    | 6893.477401 | -0.777602683 | 0.192121 | -4.04747  | 5.18E-05 | 0.000157 |
| 7323  | SYTL4    | 257.5701562 | -0.77771084  | 0.210725 | -3.69064  | 0.000224 | 0.000599 |
| 7886  | PRKCQ    | 137.0328687 | -0.778905458 | 0.22545  | -3.454895 | 0.000551 | 0.001368 |
| 1329  | CARM1    | 901.4897847 | -0.778912405 | 0.099513 | -7.827227 | 4.99E-15 | 7.36E-14 |
| 4699  | PTPRF    | 5976.212724 | -0.779083843 | 0.157983 | -4.931431 | 8.16E-07 | 3.41E-06 |
| 1340  | GNA12    | 1483.336618 | -0.779342624 | 0.099799 | -7.809153 | 5.76E-15 | 8.42E-14 |
| 6529  | ASNS     | 649.4939577 | -0.779441953 | 0.19423  | -4.012987 | 6.00E-05 | 0.00018  |
| 13061 | CPB1     | 6.637418418 | -0.779521512 | 0.479581 | -1.625422 | 0.104073 | 0.156185 |
| 10590 | PCDHGA4  | 59.68000086 | -0.780230147 | 0.319853 | -2.439338 | 0.014714 | 0.027235 |
| 9387  | PCDHB2   | 132.2653962 | -0.780917351 | 0.272601 | -2.864686 | 0.004174 | 0.008716 |
| 10247 | SNORD17  | 8.280756304 | -0.781103979 | 0.304402 | -2.566028 | 0.010287 | 0.019678 |
| 8189  | C17orf82 | 16.84696325 | -0.781107121 | 0.233988 | -3.338233 | 0.000843 | 0.002018 |
| 6415  | NOTCH3   | 5745.105471 | -0.781226217 | 0.19194  | -4.070166 | 4.70E-05 | 0.000144 |
| 7617  | FBXO24   | 5.906678058 | -0.781311687 | 0.218571 | -3.574637 | 0.000351 | 0.000903 |
| 11246 | C14orf72 | 7.815769386 | -0.78150796  | 0.354964 | -2.201652 | 0.02769  | 0.048262 |
| 12423 | PRSS37   | 0.793260742 | -0.781547325 | 0.42722  | -1.829378 | 0.067343 | 0.106254 |
| 9830  | SGEF     | 59.65973035 | -0.781574866 | 0.288468 | -2.709401 | 0.00674  | 0.013441 |
| 1449  | RNF166   | 332.7362534 | -0.781736107 | 0.102384 | -7.635341 | 2.25E-14 | 3.05E-13 |
| 13987 | DCST1    | 0.417575995 | -0.781766447 | 0.590853 | -1.323115 | 0.185797 | 0.260371 |
| 6664  | ANTXR1   | 2332.342481 | -0.781775759 | 0.197593 | -3.956491 | 7.61E-05 | 0.000224 |
| 8686  | AGBL2    | 36.34074901 | -0.781866245 | 0.249301 | -3.136236 | 0.001711 | 0.003862 |
| 1341  | PML      | 2479.23084  | -0.782101962 | 0.100151 | -7.809193 | 5.76E-15 | 8.42E-14 |
| 10000 | CORT     | 8.451167221 | -0.78220553  | 0.294889 | -2.652539 | 0.007989 | 0.015659 |
| 6125  | SEMA4A   | 363.5857398 | -0.782750264 | 0.185934 | -4.209827 | 2.56E-05 | 8.18E-05 |
| 3185  | PANX1    | 547.5287909 | -0.782774494 | 0.13287  | -5.891302 | 3.83E-09 | 2.36E-08 |
| 3077  | ITGB5    | 3560.429701 | -0.782778436 | 0.13095  | -5.977686 | 2.26E-09 | 1.44E-08 |
| 6458  | IL3RA    | 359.2653403 | -0.782975645 | 0.19354  | -4.045546 | 5.22E-05 | 0.000158 |
| 5509  | TCEB2    | 2033.259207 | -0.782997524 | 0.173448 | -4.514301 | 6.35E-06 | 2.26E-05 |
| 3179  | PSME2    | 2262.105993 | -0.783008776 | 0.132833 | -5.894704 | 3.75E-09 | 2.31E-08 |
| 5828  | PMP22    | 1862.329046 | -0.783145092 | 0.179701 | -4.358036 | 1.31E-05 | 4.41E-05 |
| 10905 | GZMK     | 450.353741  | -0.783160505 | 0.33768  | -2.319238 | 0.020382 | 0.036632 |
| 13709 | CNTN5    | 0.762493411 | -0.783421865 | 0.553531 | -1.415318 | 0.156975 | 0.224442 |
| 4126  | CHEK1    | 162.4391801 | -0.783536208 | 0.148794 | -5.265919 | 1.39E-07 | 6.63E-07 |
| 1547  | PRDX1    | 6354.617238 | -0.783644357 | 0.104543 | -7.495922 | 6.58E-14 | 8.34E-13 |
| 9314  | HTR7     | 24.39908392 | -0.783729001 | 0.270729 | -2.894879 | 0.003793 | 0.007982 |
| 2622  | DTD1     | 845.6373132 | -0.783928909 | 0.123349 | -6.355356 | 2.08E-10 | 1.55E-09 |
| 8969  | CABP7    | 5.782840512 | -0.78398376  | 0.25927  | -3.023808 | 0.002496 | 0.005455 |
| 7404  | RPL13AP3 | 12.30663422 | -0.784148751 | 0.21449  | -3.655878 | 0.000256 | 0.000679 |
| 2447  | PLD3     | 4669.969637 | -0.784349636 | 0.120415 | -6.513712 | 7.33E-11 | 5.87E-10 |
| 6535  | PDGFRB   | 5109.251043 | -0.78449902  | 0.19562  | -4.010314 | 6.06E-05 | 0.000182 |
| 4844  | HLA-DMA  | 2561.025244 | -0.784577577 | 0.16113  | -4.869219 | 1.12E-06 | 4.53E-06 |
| 6469  | C16orf48 | 468.5955549 | -0.785071955 | 0.194244 | -4.041676 | 5.31E-05 | 0.000161 |

|       |           |             |              |          |           |          |          |
|-------|-----------|-------------|--------------|----------|-----------|----------|----------|
| 6014  | GIN51     | 136.1763056 | -0.785158174 | 0.184418 | -4.257488 | 2.07E-05 | 6.74E-05 |
| 10383 | TAS2R19   | 2.065522965 | -0.785514874 | 0.312692 | -2.5121   | 0.012002 | 0.022656 |
| 9617  | MANEAL    | 204.8346361 | -0.785591123 | 0.283339 | -2.772621 | 0.005561 | 0.011334 |
| 6666  | CIITA     | 451.4229035 | -0.785682099 | 0.198625 | -3.955601 | 7.63E-05 | 0.000224 |
| 2052  | ARHGAP1   | 3867.101954 | -0.785739478 | 0.113864 | -6.900692 | 5.17E-12 | 4.94E-11 |
| 1577  | DDOST     | 5960.061385 | -0.786196268 | 0.105445 | -7.455994 | 8.92E-14 | 1.11E-12 |
| 14108 | DUOXA2    | 0.637907471 | -0.78672934  | 0.612255 | -1.284971 | 0.198803 | 0.276207 |
| 4173  | MAP2K2    | 1927.311724 | -0.787125812 | 0.150363 | -5.234853 | 1.65E-07 | 7.76E-07 |
| 6992  | PIWIL4    | 62.63961642 | -0.787125848 | 0.205605 | -3.828339 | 0.000129 | 0.000362 |
| 8618  | ITK       | 174.7044939 | -0.787242605 | 0.248466 | -3.168415 | 0.001533 | 0.003486 |
| 8477  | RGS1      | 2802.037958 | -0.787365229 | 0.244763 | -3.216845 | 0.001296 | 0.002997 |
| 11646 | MSH4      | 4.63124322  | -0.787367713 | 0.381802 | -2.062243 | 0.039185 | 0.06595  |
| 5586  | PRR5L     | 302.4498348 | -0.787375987 | 0.175734 | -4.480498 | 7.45E-06 | 2.61E-05 |
| 5516  | C8orf51   | 24.4162566  | -0.787551174 | 0.174494 | -4.513337 | 6.38E-06 | 2.27E-05 |
| 1323  | SND1      | 4782.215983 | -0.787593281 | 0.10056  | -7.83209  | 4.80E-15 | 7.11E-14 |
| 14127 | OR1J2     | 1.013203026 | -0.787664547 | 0.615592 | -1.279524 | 0.200713 | 0.278472 |
| 4811  | RPS5      | 11463.60604 | -0.788865563 | 0.161541 | -4.883365 | 1.04E-06 | 4.25E-06 |
| 8651  | VENTX     | 35.2304549  | -0.788966353 | 0.250398 | -3.150852 | 0.001628 | 0.003689 |
| 4824  | C12orf57  | 1473.252502 | -0.789057769 | 0.16174  | -4.878557 | 1.07E-06 | 4.34E-06 |
| 11079 | ANGPTL4   | 19583.07356 | -0.789381337 | 0.348782 | -2.263254 | 0.02362  | 0.041789 |
| 6465  | RAB37     | 278.4729229 | -0.789610096 | 0.19527  | -4.043681 | 5.26E-05 | 0.00016  |
| 1444  | ERGIC3    | 4333.900023 | -0.789880562 | 0.103395 | -7.639455 | 2.18E-14 | 2.96E-13 |
| 7978  | DC1003026 | 7.530641602 | -0.790699362 | 0.231261 | -3.419081 | 0.000628 | 0.001544 |
| 4579  | ZNF524    | 262.8219686 | -0.790812729 | 0.158257 | -4.997004 | 5.82E-07 | 2.49E-06 |
| 14827 | STMN4     | 0.336343332 | -0.790828613 | 0.747809 | -1.057527 | 0.290271 | 0.383754 |
| 9065  | RTN4R     | 99.49206915 | -0.791136506 | 0.264362 | -2.992624 | 0.002766 | 0.005981 |
| 4242  | ABI3      | 476.0516698 | -0.791170318 | 0.152567 | -5.185717 | 2.15E-07 | 9.94E-07 |
| 13132 | KIRREL2   | 2.684748493 | -0.79125429  | 0.495077 | -1.598244 | 0.109989 | 0.164171 |
| 10501 | RASGEF1A  | 170.7983046 | -0.791690363 | 0.320362 | -2.471235 | 0.013465 | 0.025133 |
| 2281  | COMT      | 1696.92513  | -0.791805321 | 0.118709 | -6.670122 | 2.56E-11 | 2.20E-10 |
| 8654  | C9orf172  | 15.03958708 | -0.792789166 | 0.251732 | -3.149342 | 0.001636 | 0.003706 |
| 1454  | GNAI2     | 6815.525914 | -0.793281877 | 0.103941 | -7.63202  | 2.31E-14 | 3.12E-13 |
| 2424  | PMM2      | 1086.630675 | -0.793846793 | 0.121418 | -6.538131 | 6.23E-11 | 5.04E-10 |
| 7503  | NACA2     | 57.07857215 | -0.794659998 | 0.219736 | -3.616429 | 0.000299 | 0.00078  |
| 9086  | SLC17A7   | 7.53298448  | -0.79479272  | 0.266375 | -2.98374  | 0.002847 | 0.006143 |
| 9316  | CHADL     | 31.43892603 | -0.794892636 | 0.274626 | -2.89446  | 0.003798 | 0.007991 |
| 14355 | ITIH1     | 9.970444107 | -0.795032166 | 0.655722 | -1.212454 | 0.225339 | 0.307667 |
| 2040  | TRIM65    | 428.1967803 | -0.795042394 | 0.114884 | -6.920377 | 4.50E-12 | 4.33E-11 |
| 6291  | HOPX      | 220.1289007 | -0.795303303 | 0.192416 | -4.133253 | 3.58E-05 | 0.000111 |
| 11634 | EN1       | 9.971792158 | -0.795346937 | 0.384788 | -2.066972 | 0.038737 | 0.065264 |
| 6170  | MRPS12    | 667.0153678 | -0.795916698 | 0.189947 | -4.190212 | 2.79E-05 | 8.85E-05 |
| 2600  | PPP2R4    | 4372.612932 | -0.795925168 | 0.124739 | -6.38073  | 1.76E-10 | 1.33E-09 |
| 8638  | CACNA1A   | 22.02027498 | -0.796270376 | 0.252236 | -3.156849 | 0.001595 | 0.003619 |
| 3969  | PTMS      | 5144.847756 | -0.796341706 | 0.148554 | -5.360638 | 8.29E-08 | 4.10E-07 |
| 10039 | APOD      | 188.8792109 | -0.796418021 | 0.301888 | -2.638128 | 0.008337 | 0.016277 |
| 8200  | PROS1     | 4479.956942 | -0.796564586 | 0.239056 | -3.332124 | 0.000862 | 0.00206  |
| 10116 | CTSL2     | 29.16162536 | -0.796801157 | 0.305327 | -2.609661 | 0.009063 | 0.017559 |



|       |           |             |              |          |           |          |          |
|-------|-----------|-------------|--------------|----------|-----------|----------|----------|
| 14873 | AVP       | 0.516317313 | -0.79685527  | 0.762916 | -1.044487 | 0.29626  | 0.390439 |
| 5190  | TTYH2     | 224.9866405 | -0.797187523 | 0.170316 | -4.680633 | 2.86E-06 | 1.08E-05 |
| 5780  | TIAF1     | 402.0824593 | -0.797706317 | 0.18203  | -4.382272 | 1.17E-05 | 3.98E-05 |
| 15038 | SLC1A6    | 0.802718694 | -0.797873286 | 0.801675 | -0.995257 | 0.319611 | 0.416591 |
| 8720  | ROPN1L    | 18.70792086 | -0.797875656 | 0.255631 | -3.121202 | 0.001801 | 0.004049 |
| 9350  | MST1      | 568.5527806 | -0.797898163 | 0.27715  | -2.878943 | 0.00399  | 0.008365 |
| 3045  | UBA7      | 925.7442147 | -0.798151479 | 0.132934 | -6.004141 | 1.92E-09 | 1.24E-08 |
| 2632  | FAM129B   | 3715.520978 | -0.798278782 | 0.125842 | -6.343502 | 2.25E-10 | 1.67E-09 |
| 4892  | PLXND1    | 4965.656662 | -0.798503938 | 0.165281 | -4.831197 | 1.36E-06 | 5.44E-06 |
| 11990 | TPIIP3    | 0.744940793 | -0.798728451 | 0.406848 | -1.963211 | 0.049622 | 0.081121 |
| 3296  | NHP2      | 1348.187607 | -0.798768587 | 0.137273 | -5.818847 | 5.93E-09 | 3.52E-08 |
| 11745 | KLK14     | 1.263340938 | -0.799442163 | 0.392252 | -2.038081 | 0.041542 | 0.069328 |
| 2196  | POLR2H    | 906.8807183 | -0.799504878 | 0.118267 | -6.760149 | 1.38E-11 | 1.23E-10 |
| 2596  | BANF1     | 1916.431613 | -0.799883604 | 0.12528  | -6.384777 | 1.72E-10 | 1.30E-09 |
| 2959  | RP9       | 165.0901684 | -0.800123826 | 0.131954 | -6.063646 | 1.33E-09 | 8.82E-09 |
| 16685 | SNORA20   | 0.294060519 | -0.800861    | 1.532981 | -0.522421 | 0.601377 | 0.706479 |
| 17221 | CGB5      | 0.181358392 | -0.800861105 | 2.087602 | -0.383627 | 0.701255 | 0.79817  |
| 16393 | APOA5     | 0.226306597 | -0.80086113  | 1.329438 | -0.602406 | 0.546904 | 0.653906 |
| 16842 | FAM90A7   | 0.229312276 | -0.800861182 | 1.669379 | -0.479736 | 0.631415 | 0.734801 |
| 15408 | LGALS9B   | 0.26050821  | -0.800861185 | 0.902697 | -0.887187 | 0.374978 | 0.477022 |
| 15610 | COX8C     | 0.249278642 | -0.800861194 | 0.961896 | -0.832586 | 0.405078 | 0.508645 |
| 16209 | CALHM3    | 0.188752581 | -0.800861245 | 1.226305 | -0.653069 | 0.513712 | 0.621215 |
| 16882 | KRT33A    | 0.162972984 | -0.80086126  | 1.707204 | -0.469107 | 0.638993 | 0.741909 |
| 15859 | OC1001280 | 0.160775493 | -0.800861297 | 1.059489 | -0.755894 | 0.449713 | 0.555825 |
| 14776 | MUSK      | 0.28551802  | -0.800909171 | 0.744718 | -1.075453 | 0.282172 | 0.374313 |
| 3971  | NAA10     | 837.985083  | -0.801019058 | 0.149442 | -5.360078 | 8.32E-08 | 4.11E-07 |
| 4538  | DAPK3     | 816.4472003 | -0.801039066 | 0.15971  | -5.015593 | 5.29E-07 | 2.28E-06 |
| 13078 | TMEM105   | 2.663117933 | -0.801352057 | 0.494489 | -1.620568 | 0.10511  | 0.157537 |
| 15591 | ALPP      | 0.348046827 | -0.801418936 | 0.95729  | -0.837175 | 0.402494 | 0.506016 |
| 3715  | ZNF787    | 490.3995565 | -0.80152019  | 0.144979 | -5.528518 | 3.23E-08 | 1.70E-07 |
| 1779  | TNKS1BP1  | 2876.604234 | -0.801689136 | 0.111237 | -7.207052 | 5.72E-13 | 6.30E-12 |
| 8555  | PTPN22    | 119.3290595 | -0.801853272 | 0.251537 | -3.187817 | 0.001434 | 0.003284 |
| 10317 | SPON2     | 2946.47494  | -0.802052182 | 0.315636 | -2.541069 | 0.011051 | 0.020996 |
| 3199  | KPNA2     | 926.140599  | -0.802151698 | 0.136336 | -5.883634 | 4.01E-09 | 2.46E-08 |
| 12436 | SNORD10   | 1.575415139 | -0.802314377 | 0.439452 | -1.825716 | 0.067893 | 0.10701  |
| 12712 | XPNPEP2   | 107.6688023 | -0.802499276 | 0.464236 | -1.728643 | 0.083873 | 0.129334 |
| 7770  | JUNB      | 4338.284887 | -0.802776641 | 0.228745 | -3.50949  | 0.000449 | 0.001133 |
| 5183  | POLR2I    | 564.0788098 | -0.802939068 | 0.171411 | -4.684283 | 2.81E-06 | 1.06E-05 |
| 5165  | GUK1      | 3825.136736 | -0.802997619 | 0.17111  | -4.692884 | 2.69E-06 | 1.02E-05 |
| 15894 | GUCY2E    | 0.642656839 | -0.803076262 | 1.078262 | -0.744788 | 0.4564   | 0.562872 |
| 3119  | GM2A      | 2993.39425  | -0.803167047 | 0.134988 | -5.949922 | 2.68E-09 | 1.69E-08 |
| 10684 | PPIAL4D   | 1.2777606   | -0.803177119 | 0.334416 | -2.401728 | 0.016318 | 0.029937 |
| 9996  | PCDHGB8I  | 3.907468257 | -0.803212213 | 0.302656 | -2.653876 | 0.007957 | 0.015603 |
| 11908 | IL23R     | 1.434791477 | -0.803721474 | 0.40485  | -1.985232 | 0.047119 | 0.077556 |
| 7389  | EVI2B     | 717.2856654 | -0.803825081 | 0.219558 | -3.661111 | 0.000251 | 0.000666 |
| 1955  | ARRB2     | 1213.649593 | -0.803910621 | 0.114333 | -7.031337 | 2.05E-12 | 2.05E-11 |
| 6817  | SAMHD1    | 1128.188374 | -0.803942036 | 0.206537 | -3.892477 | 9.92E-05 | 0.000285 |

|       |          |             |              |          |           |          |          |
|-------|----------|-------------|--------------|----------|-----------|----------|----------|
| 6428  | PRRT1    | 35.00034313 | -0.804030161 | 0.197988 | -4.060999 | 4.89E-05 | 0.000149 |
| 3815  | CSDAP1   | 72.27842867 | -0.804111201 | 0.147171 | -5.463793 | 4.66E-08 | 2.39E-07 |
| 12155 | PP14571  | 1.632822618 | -0.804150776 | 0.421253 | -1.908948 | 0.056269 | 0.090738 |
| 8175  | FAM173A  | 172.1156886 | -0.804219139 | 0.240538 | -3.343424 | 0.000828 | 0.001984 |
| 4693  | MARCKSL  | 1603.124413 | -0.804323039 | 0.163089 | -4.931812 | 8.15E-07 | 3.40E-06 |
| 7455  | TNFAIP2  | 2122.182481 | -0.80440917  | 0.221315 | -3.634682 | 0.000278 | 0.000732 |
| 9618  | ISM1     | 54.6112505  | -0.804419623 | 0.29015  | -2.772427 | 0.005564 | 0.011338 |
| 5521  | CHCHD5   | 325.7544004 | -0.80463426  | 0.178355 | -4.511411 | 6.44E-06 | 2.29E-05 |
| 2866  | NXT1     | 305.2099189 | -0.804674165 | 0.131243 | -6.1312   | 8.72E-10 | 5.97E-09 |
| 1840  | CHST14   | 773.0635726 | -0.804729168 | 0.112571 | -7.148621 | 8.77E-13 | 9.34E-12 |
| 3809  | IFI35    | 812.9319159 | -0.805216671 | 0.147281 | -5.467201 | 4.57E-08 | 2.35E-07 |
| 4804  | AMIGO3   | 72.27774337 | -0.805275493 | 0.164844 | -4.885076 | 1.03E-06 | 4.22E-06 |
| 9922  | MGST1    | 3985.927213 | -0.805406468 | 0.300598 | -2.679343 | 0.007377 | 0.014573 |
| 4868  | GUSBP3   | 55.96117498 | -0.805508392 | 0.165975 | -4.853187 | 1.21E-06 | 4.89E-06 |
| 1914  | EIF5A    | 5672.103836 | -0.805956797 | 0.11394  | -7.073492 | 1.51E-12 | 1.55E-11 |
| 8244  | ABLIM3   | 2841.716846 | -0.805983638 | 0.243189 | -3.314229 | 0.000919 | 0.002185 |
| 8393  | C5orf49  | 104.0521554 | -0.806047338 | 0.24796  | -3.250715 | 0.001151 | 0.002688 |
| 3032  | RPL23    | 11632.33802 | -0.806216941 | 0.134148 | -6.009906 | 1.86E-09 | 1.20E-08 |
| 3043  | ZNF408   | 269.2245441 | -0.806381975 | 0.134296 | -6.004525 | 1.92E-09 | 1.24E-08 |
| 3666  | ANKRD19  | 50.81714638 | -0.806663238 | 0.145116 | -5.558734 | 2.72E-08 | 1.45E-07 |
| 13631 | HEPN1    | 1.020388849 | -0.80674971  | 0.558644 | -1.44412  | 0.148705 | 0.213834 |
| 3338  | RPL14    | 6841.228426 | -0.807381392 | 0.139361 | -5.793448 | 6.90E-09 | 4.05E-08 |
| 9862  | KIF19    | 14.08843079 | -0.807464203 | 0.299146 | -2.699234 | 0.00695  | 0.013813 |
| 11379 | CXCL2    | 259.8136706 | -0.808085885 | 0.374351 | -2.158632 | 0.030879 | 0.05319  |
| 13548 | MMEL1    | 3.492240003 | -0.808229162 | 0.549179 | -1.471705 | 0.141101 | 0.204142 |
| 7398  | ALDH3B1  | 1140.705219 | -0.808437716 | 0.221031 | -3.657572 | 0.000255 | 0.000675 |
| 12549 | PDC      | 0.613586624 | -0.808921712 | 0.451752 | -1.790633 | 0.073352 | 0.114564 |
| 5642  | MAP1A    | 437.3157231 | -0.80905279  | 0.181735 | -4.45182  | 8.51E-06 | 2.96E-05 |
| 2532  | BCKDK    | 2420.538333 | -0.809192594 | 0.125702 | -6.437373 | 1.22E-10 | 9.41E-10 |
| 4261  | HHLA3    | 148.1726206 | -0.809201839 | 0.156327 | -5.176344 | 2.26E-07 | 1.04E-06 |
| 11824 | MGC45800 | 41.50760243 | -0.809337    | 0.402092 | -2.012818 | 0.044134 | 0.073159 |
| 4440  | ZNF688   | 312.3383345 | -0.809396557 | 0.159361 | -5.078997 | 3.79E-07 | 1.68E-06 |
| 3203  | PFDN2    | 695.9842392 | -0.809530947 | 0.137626 | -5.882117 | 4.05E-09 | 2.48E-08 |
| 4192  | PDLIM1   | 4160.648743 | -0.809664848 | 0.155286 | -5.214015 | 1.85E-07 | 8.64E-07 |
| 9498  | ETV4     | 11.42094452 | -0.809850796 | 0.287136 | -2.820443 | 0.004796 | 0.009897 |
| 7088  | IMPG2    | 3.622593284 | -0.809986815 | 0.213756 | -3.78931  | 0.000151 | 0.000418 |
| 7268  | ZNF692   | 405.5329312 | -0.810111931 | 0.217975 | -3.716542 | 0.000202 | 0.000545 |
| 846   | SLC24A6  | 715.4674291 | -0.810219175 | 0.093745 | -8.642817 | 5.48E-18 | 1.27E-16 |
| 9049  | EPHA3    | 421.6576815 | -0.810239231 | 0.270403 | -2.996409 | 0.002732 | 0.005917 |
| 9176  | C7orf54  | 2.323114965 | -0.810331443 | 0.274969 | -2.946997 | 0.003209 | 0.006853 |
| 10439 | RPS26P11 | 1.150451271 | -0.810699783 | 0.324521 | -2.498139 | 0.012485 | 0.023444 |
| 7775  | NPDC1    | 1033.567739 | -0.811160985 | 0.231179 | -3.5088   | 0.00045  | 0.001135 |
| 2173  | NRSN2    | 1191.899113 | -0.811221814 | 0.119498 | -6.788562 | 1.13E-11 | 1.02E-10 |
| 10736 | CYP4F11  | 166.0365873 | -0.811920248 | 0.340397 | -2.385214 | 0.017069 | 0.031161 |
| 11988 | GRK7     | 0.689437478 | -0.811938936 | 0.413519 | -1.963485 | 0.04959  | 0.081082 |
| 12726 | SNORA67  | 0.712234965 | -0.812297904 | 0.471225 | -1.723799 | 0.084744 | 0.130526 |
| 1631  | MCM6     | 722.1532043 | -0.812537537 | 0.110028 | -7.384844 | 1.53E-13 | 1.83E-12 |

|       |          |             |              |          |           |          |          |
|-------|----------|-------------|--------------|----------|-----------|----------|----------|
| 5397  | ASL      | 1161.000769 | -0.812703983 | 0.177966 | -4.566627 | 4.96E-06 | 1.80E-05 |
| 8495  | GLI2     | 85.44362739 | -0.812888668 | 0.253386 | -3.208108 | 0.001336 | 0.003083 |
| 2467  | LSM2     | 510.8647769 | -0.813083826 | 0.125111 | -6.498901 | 8.09E-11 | 6.43E-10 |
| 11348 | C10orf62 | 4.093934498 | -0.813094627 | 0.375411 | -2.16588  | 0.03032  | 0.052363 |
| 9148  | HES4     | 126.5163849 | -0.81330158  | 0.274852 | -2.959051 | 0.003086 | 0.006612 |
| 1153  | SP110    | 547.7627554 | -0.813411225 | 0.100598 | -8.085748 | 6.18E-16 | 1.05E-14 |
| 2700  | RPS12    | 10089.7518  | -0.813876297 | 0.129538 | -6.282925 | 3.32E-10 | 2.41E-09 |
| 11530 | ARMS2    | 1.087518878 | -0.813920717 | 0.3862   | -2.107513 | 0.035073 | 0.059624 |
| 9939  | WNT3     | 22.34848676 | -0.81403966  | 0.304442 | -2.673871 | 0.007498 | 0.014787 |
| 8118  | PTPRO    | 192.7029943 | -0.814406972 | 0.242155 | -3.363167 | 0.000771 | 0.00186  |
| 3576  | TRANK1   | 623.4130939 | -0.814624729 | 0.144934 | -5.620677 | 1.90E-08 | 1.04E-07 |
| 3676  | ALKBH2   | 278.4426645 | -0.815231999 | 0.146798 | -5.553445 | 2.80E-08 | 1.49E-07 |
| 8645  | KIAA0748 | 53.67308488 | -0.815509125 | 0.258641 | -3.15305  | 0.001616 | 0.003663 |
| 5433  | FLNA     | 19509.68907 | -0.81569108  | 0.179209 | -4.551627 | 5.32E-06 | 1.92E-05 |
| 1291  | DBNL     | 2320.579613 | -0.815863899 | 0.103606 | -7.874673 | 3.42E-15 | 5.19E-14 |
| 7510  | MSL3L2   | 83.54836217 | -0.816197965 | 0.225917 | -3.612823 | 0.000303 | 0.000791 |
| 9715  | GBP6     | 5.232265437 | -0.816459325 | 0.297618 | -2.743314 | 0.006082 | 0.012272 |
| 15164 | HGC6.3   | 1.615536154 | -0.816499239 | 0.853014 | -0.957194 | 0.33847  | 0.437477 |
| 2222  | BAX      | 818.4241681 | -0.816806246 | 0.121351 | -6.730957 | 1.69E-11 | 1.49E-10 |
| 11518 | CAMK2A   | 4.749670072 | -0.817086638 | 0.387121 | -2.110673 | 0.0348   | 0.059222 |
| 10923 | RHOXF1   | 3.742718761 | -0.817088057 | 0.353532 | -2.311214 | 0.020821 | 0.037363 |
| 7823  | SYTL2    | 1890.638752 | -0.817147925 | 0.233949 | -3.492842 | 0.000478 | 0.001197 |
| 9156  | KCNB1    | 19.63358635 | -0.81729133  | 0.276458 | -2.956296 | 0.003114 | 0.006665 |
| 3789  | HTATIP2  | 1331.056361 | -0.817517506 | 0.149187 | -5.47981  | 4.26E-08 | 2.20E-07 |
| 1043  | DGUOK    | 736.0850696 | -0.817654059 | 0.099104 | -8.250505 | 1.58E-16 | 2.96E-15 |
| 8679  | HS3ST3B1 | 12.71522697 | -0.817760953 | 0.260454 | -3.139757 | 0.001691 | 0.003819 |
| 4046  | FADS1    | 912.3045799 | -0.817827865 | 0.15408  | -5.30781  | 1.11E-07 | 5.37E-07 |
| 7387  | DGCR6    | 600.5974139 | -0.818071509 | 0.223439 | -3.661277 | 0.000251 | 0.000666 |
| 8140  | KLRA1    | 40.99211051 | -0.818254696 | 0.243775 | -3.356604 | 0.000789 | 0.0019   |
| 6987  | CECR1    | 2107.008008 | -0.818679683 | 0.213707 | -3.830858 | 0.000128 | 0.000358 |
| 1845  | SFXN3    | 1706.734906 | -0.818827307 | 0.114595 | -7.145422 | 8.97E-13 | 9.53E-12 |
| 3091  | TOMM7    | 2524.060065 | -0.820300435 | 0.13742  | -5.969277 | 2.38E-09 | 1.51E-08 |
| 4512  | THAP3    | 308.6345367 | -0.820783421 | 0.163215 | -5.028835 | 4.93E-07 | 2.14E-06 |
| 3779  | CENPO    | 82.46823816 | -0.8211274   | 0.149677 | -5.485981 | 4.11E-08 | 2.13E-07 |
| 11198 | GFRA1    | 614.5297415 | -0.82118638  | 0.369623 | -2.221684 | 0.026305 | 0.046044 |
| 8268  | CCBP2    | 26.28097525 | -0.821245748 | 0.24849  | -3.304945 | 0.00095  | 0.002252 |
| 4171  | FAU      | 7822.154199 | -0.821359467 | 0.156878 | -5.235652 | 1.64E-07 | 7.73E-07 |
| 3293  | CNPY4    | 387.2918682 | -0.822668798 | 0.141355 | -5.81989  | 5.89E-09 | 3.51E-08 |
| 6779  | UBXN11   | 622.3858808 | -0.822764004 | 0.210551 | -3.907673 | 9.32E-05 | 0.000269 |
| 1704  | ALDH18A1 | 2172.982563 | -0.823032846 | 0.112856 | -7.292756 | 3.04E-13 | 3.49E-12 |
| 3163  | ORAI3    | 1272.241361 | -0.823597321 | 0.139372 | -5.909339 | 3.43E-09 | 2.13E-08 |
| 2070  | RPL23AP7 | 95.1363471  | -0.823623857 | 0.119713 | -6.879999 | 5.99E-12 | 5.67E-11 |
| 5380  | ZNF90    | 168.6017707 | -0.823663704 | 0.17995  | -4.577183 | 4.71E-06 | 1.72E-05 |
| 4453  | RCN1     | 4087.920418 | -0.823823599 | 0.162494 | -5.069876 | 3.98E-07 | 1.75E-06 |
| 7238  | RASSF7   | 918.309137  | -0.823835401 | 0.2209   | -3.729442 | 0.000192 | 0.00052  |
| 2211  | ITPA     | 743.238417  | -0.824035576 | 0.122166 | -6.745208 | 1.53E-11 | 1.35E-10 |
| 13335 | AQP10    | 0.48226933  | -0.824332695 | 0.537977 | -1.532282 | 0.125453 | 0.184402 |

|       |           |             |              |          |           |          |          |
|-------|-----------|-------------|--------------|----------|-----------|----------|----------|
| 1603  | 44083     | 6513.582395 | -0.824437748 | 0.111139 | -7.418058 | 1.19E-13 | 1.45E-12 |
| 9202  | RND2      | 59.03740101 | -0.824726111 | 0.280764 | -2.937432 | 0.003309 | 0.007049 |
| 12050 | MYO18B    | 1.939391341 | -0.824827025 | 0.424294 | -1.943998 | 0.051896 | 0.084416 |
| 8557  | KLRK1     | 146.1519709 | -0.825036337 | 0.258833 | -3.187522 | 0.001435 | 0.003287 |
| 15294 | KLK11     | 1.246149881 | -0.825154917 | 0.894497 | -0.922479 | 0.356279 | 0.456612 |
| 1689  | TNFRSF1A  | 3609.911982 | -0.825385487 | 0.11288  | -7.312057 | 2.63E-13 | 3.05E-12 |
| 4639  | MANF      | 1226.718782 | -0.825874441 | 0.166193 | -4.969355 | 6.72E-07 | 2.84E-06 |
| 9318  | TFPI      | 5543.285591 | -0.8262592   | 0.285574 | -2.893325 | 0.003812 | 0.008018 |
| 2946  | STAT5A    | 815.5113995 | -0.826776277 | 0.136136 | -6.073165 | 1.25E-09 | 8.34E-09 |
| 1125  | TUBB      | 12582.79663 | -0.826790253 | 0.101794 | -8.12217  | 4.58E-16 | 7.98E-15 |
| 8003  | REM1      | 41.77112155 | -0.827664138 | 0.242783 | -3.409073 | 0.000652 | 0.001596 |
| 1498  | SMARCD2   | 1059.461148 | -0.827747105 | 0.109325 | -7.571403 | 3.69E-14 | 4.83E-13 |
| 5857  | GPR161    | 83.85423802 | -0.827940042 | 0.190669 | -4.342298 | 1.41E-05 | 4.72E-05 |
| 8704  | DIRC3     | 31.75082641 | -0.82812414  | 0.26477  | -3.127711 | 0.001762 | 0.003967 |
| 3723  | GMPPA     | 881.4546113 | -0.828367546 | 0.149965 | -5.523725 | 3.32E-08 | 1.75E-07 |
| 6764  | LDLRAD2   | 302.1037839 | -0.828494718 | 0.211748 | -3.912636 | 9.13E-05 | 0.000265 |
| 2171  | MCM5      | 962.7967692 | -0.829117911 | 0.122059 | -6.792757 | 1.10E-11 | 9.93E-11 |
| 2125  | RPL23A    | 4487.169471 | -0.829621871 | 0.121559 | -6.824869 | 8.80E-12 | 8.12E-11 |
| 7762  | CLDN5     | 464.1854885 | -0.829905322 | 0.236194 | -3.513666 | 0.000442 | 0.001116 |
| 8950  | H2BFXP    | 5.078393076 | -0.829936477 | 0.27372  | -3.032062 | 0.002429 | 0.005319 |
| 7190  | RADIL     | 11.54703256 | -0.829975168 | 0.221396 | -3.748823 | 0.000178 | 0.000484 |
| 6084  | GUCY1A2   | 82.8992104  | -0.830013119 | 0.19635  | -4.22721  | 2.37E-05 | 7.62E-05 |
| 8997  | SCARNA12  | 4.916588675 | -0.830376967 | 0.275562 | -3.013396 | 0.002583 | 0.005628 |
| 11152 | SLC8A3    | 5.161274126 | -0.830758442 | 0.371374 | -2.236986 | 0.025287 | 0.044445 |
| 7231  | KCNMB4    | 124.597468  | -0.830793079 | 0.222535 | -3.733318 | 0.000189 | 0.000512 |
| 4921  | MRPS34    | 1222.160252 | -0.831039967 | 0.172551 | -4.816206 | 1.46E-06 | 5.83E-06 |
| 8867  | LBX2      | 17.51358972 | -0.831199881 | 0.27127  | -3.064106 | 0.002183 | 0.004826 |
| 9829  | EOMES     | 93.92298735 | -0.831339007 | 0.306829 | -2.709455 | 0.006739 | 0.01344  |
| 8914  | NTF3      | 29.87228147 | -0.831400693 | 0.272935 | -3.046148 | 0.002318 | 0.005097 |
| 8765  | TMEM156   | 42.17606766 | -0.831507591 | 0.268367 | -3.098396 | 0.001946 | 0.004351 |
| 4944  | AZI1      | 230.3565202 | -0.831681556 | 0.17317  | -4.802695 | 1.57E-06 | 6.21E-06 |
| 10307 | AK5       | 11.69919945 | -0.83214584  | 0.327285 | -2.542571 | 0.011004 | 0.020924 |
| 2047  | PLBD2     | 1014.738965 | -0.832150819 | 0.120401 | -6.911504 | 4.80E-12 | 4.59E-11 |
| 11885 | C2orf70   | 5.037863632 | -0.832170611 | 0.417443 | -1.993496 | 0.046207 | 0.076206 |
| 14205 | ART1      | 0.592642595 | -0.832288184 | 0.663218 | -1.254924 | 0.209506 | 0.289091 |
| 8735  | PARP15    | 25.32955113 | -0.832320085 | 0.267224 | -3.114688 | 0.001841 | 0.004132 |
| 8381  | PTCH2     | 21.38761522 | -0.832492208 | 0.255528 | -3.25793  | 0.001122 | 0.002624 |
| 10108 | RP1       | 8.510087434 | -0.832561718 | 0.318495 | -2.614052 | 0.008948 | 0.017351 |
| 9455  | XKR5      | 6.203184235 | -0.832803913 | 0.293635 | -2.836189 | 0.004566 | 0.009465 |
| 3875  | SERF2     | 8584.126555 | -0.8332567   | 0.153736 | -5.420056 | 5.96E-08 | 3.01E-07 |
| 6228  | GGTA1     | 487.3707441 | -0.833272881 | 0.200077 | -4.164763 | 3.12E-05 | 9.81E-05 |
| 13867 | DPPA4     | 0.653346296 | -0.834089229 | 0.61232  | -1.362179 | 0.173141 | 0.244735 |
| 1339  | MAP7D1    | 1622.891542 | -0.834589571 | 0.106861 | -7.81002  | 5.72E-15 | 8.38E-14 |
| 7091  | SLC19A1   | 217.4849144 | -0.834710195 | 0.220352 | -3.788083 | 0.000152 | 0.00042  |
| 5135  | TBC1D3    | 374.0842946 | -0.835031466 | 0.177256 | -4.71089  | 2.47E-06 | 9.41E-06 |
| 15054 | SNORA23   | 0.462215436 | -0.835032807 | 0.844486 | -0.988806 | 0.322758 | 0.420246 |
| 12650 | HIST1H2BI | 2.725011835 | -0.835103937 | 0.475276 | -1.757091 | 0.078902 | 0.122258 |

|       |           |             |              |          |           |          |          |
|-------|-----------|-------------|--------------|----------|-----------|----------|----------|
| 4039  | TUBA1A    | 4575.607167 | -0.835738726 | 0.157309 | -5.312708 | 1.08E-07 | 5.24E-07 |
| 12446 | KIAA1644  | 127.9270425 | -0.836101743 | 0.458991 | -1.821607 | 0.068515 | 0.107903 |
| 10114 | ANKRD22   | 180.2561851 | -0.836354779 | 0.320437 | -2.610044 | 0.009053 | 0.017545 |
| 12817 | ASIP      | 6.372810844 | -0.836399629 | 0.492045 | -1.699845 | 0.08916  | 0.136342 |
| 9734  | RAB39     | 21.56561298 | -0.836843625 | 0.305682 | -2.737624 | 0.006188 | 0.012462 |
| 7670  | MTCP1     | 139.2602652 | -0.836856415 | 0.235634 | -3.551511 | 0.000383 | 0.000979 |
| 9321  | SCARA3    | 342.7239716 | -0.83729215  | 0.289501 | -2.892189 | 0.003826 | 0.008045 |
| 7643  | ADAM28    | 268.9630758 | -0.837378178 | 0.234988 | -3.563493 | 0.000366 | 0.000939 |
| 5969  | KCNJ8     | 619.7992245 | -0.837494205 | 0.195571 | -4.282313 | 1.85E-05 | 6.07E-05 |
| 2220  | RPL11     | 14548.33211 | -0.837702854 | 0.124402 | -6.733829 | 1.65E-11 | 1.46E-10 |
| 1772  | C19orf66  | 756.1331969 | -0.837736743 | 0.116053 | -7.21856  | 5.25E-13 | 5.81E-12 |
| 6386  | RNASE1    | 3213.98541  | -0.837745683 | 0.205188 | -4.082819 | 4.45E-05 | 0.000137 |
| 9874  | HPCA      | 31.90078538 | -0.83777581  | 0.310754 | -2.695948 | 0.007019 | 0.013933 |
| 3613  | S100A10   | 9453.760999 | -0.837836137 | 0.149611 | -5.600093 | 2.14E-08 | 1.16E-07 |
| 13190 | FLJ43390  | 1.134320196 | -0.838180079 | 0.529507 | -1.582945 | 0.113434 | 0.168569 |
| 1551  | STX4      | 1140.531821 | -0.838323198 | 0.111899 | -7.491761 | 6.80E-14 | 8.59E-13 |
| 13051 | HIST1H3C  | 0.436681341 | -0.838337982 | 0.514448 | -1.629587 | 0.103189 | 0.154977 |
| 1521  | C12orf45  | 154.9407097 | -0.838390679 | 0.111314 | -7.531743 | 5.01E-14 | 6.45E-13 |
| 3248  | B4GALT1   | 5315.870381 | -0.838892044 | 0.143311 | -5.853657 | 4.81E-09 | 2.90E-08 |
| 4408  | LOC388692 | 305.2510087 | -0.839144646 | 0.164646 | -5.096653 | 3.46E-07 | 1.54E-06 |
| 2245  | C7orf27   | 934.5485144 | -0.839212055 | 0.12523  | -6.701348 | 2.07E-11 | 1.80E-10 |
| 9084  | P2RY10    | 49.46216404 | -0.839879086 | 0.281369 | -2.984976 | 0.002836 | 0.006119 |
| 13748 | BFSP2     | 4.164134148 | -0.839933318 | 0.59878  | -1.40274  | 0.160694 | 0.229107 |
| 10381 | DAND5     | 4.587179844 | -0.840024302 | 0.334372 | -2.512242 | 0.011997 | 0.022652 |
| 2106  | TBCB      | 1076.597924 | -0.840523141 | 0.122806 | -6.84432  | 7.68E-12 | 7.15E-11 |
| 14571 | FAM170A   | 0.36530941  | -0.841471798 | 0.734771 | -1.145216 | 0.25212  | 0.339153 |
| 11154 | DRD1      | 8.915955854 | -0.841806098 | 0.376438 | -2.236243 | 0.025336 | 0.044515 |
| 4852  | PPP2R3B   | 144.6625817 | -0.842569766 | 0.173266 | -4.862875 | 1.16E-06 | 4.67E-06 |
| 10395 | ANPEP     | 10424.86464 | -0.842595492 | 0.33596  | -2.50802  | 0.012141 | 0.022882 |
| 6392  | LRRK1     | 510.3080836 | -0.842604359 | 0.20661  | -4.078228 | 4.54E-05 | 0.000139 |
| 5364  | TLR5      | 155.0754034 | -0.842667162 | 0.183804 | -4.584588 | 4.55E-06 | 1.66E-05 |
| 4765  | GALE      | 947.1173251 | -0.84302637  | 0.172    | -4.901306 | 9.52E-07 | 3.92E-06 |
| 3980  | CKS1B     | 383.071691  | -0.843084955 | 0.157487 | -5.353376 | 8.63E-08 | 4.25E-07 |
| 6282  | EHD2      | 6747.241121 | -0.843246843 | 0.203719 | -4.139272 | 3.48E-05 | 0.000109 |
| 7652  | SLC9A5    | 23.73730858 | -0.84425438  | 0.237261 | -3.558337 | 0.000373 | 0.000956 |
| 6418  | BCL3      | 926.4738047 | -0.844294147 | 0.207551 | -4.067883 | 4.74E-05 | 0.000145 |
| 12707 | LOC340508 | 1.684170414 | -0.844512655 | 0.487764 | -1.731395 | 0.083381 | 0.128619 |
| 8353  | HK2       | 2586.502366 | -0.844639235 | 0.258103 | -3.272495 | 0.001066 | 0.002502 |
| 843   | PABPC1    | 17104.64922 | -0.844807821 | 0.097674 | -8.649294 | 5.18E-18 | 1.20E-16 |
| 11057 | DC1001290 | 1.637053951 | -0.845345444 | 0.372125 | -2.271674 | 0.023106 | 0.040961 |
| 1022  | C20orf20  | 409.3305242 | -0.845535187 | 0.101885 | -8.298896 | 1.05E-16 | 2.02E-15 |
| 15770 | LGALS14   | 0.349684219 | -0.845735497 | 1.07871  | -0.784025 | 0.433025 | 0.538203 |
| 4160  | CALHM2    | 379.4375018 | -0.845762463 | 0.16126  | -5.244715 | 1.57E-07 | 7.38E-07 |
| 5479  | HLA-DPA1  | 12807.81146 | -0.845776734 | 0.186658 | -4.531158 | 5.87E-06 | 2.10E-05 |
| 7427  | APOBEC3E  | 97.01517031 | -0.845824514 | 0.232009 | -3.645659 | 0.000267 | 0.000704 |
| 7571  | ACBD7     | 13.98036356 | -0.846211641 | 0.235754 | -3.589382 | 0.000331 | 0.000858 |
| 5390  | FGR       | 346.3943362 | -0.846541194 | 0.185159 | -4.571968 | 4.83E-06 | 1.76E-05 |

|       |           |             |              |          |           |          |          |
|-------|-----------|-------------|--------------|----------|-----------|----------|----------|
| 6574  | GPR65     | 171.5724671 | -0.846828844 | 0.212045 | -3.993623 | 6.51E-05 | 0.000194 |
| 8608  | PSORS1C1  | 34.49761144 | -0.847156531 | 0.266995 | -3.172933 | 0.001509 | 0.003436 |
| 3512  | EFNB1     | 1190.430667 | -0.847333057 | 0.149605 | -5.663808 | 1.48E-08 | 8.26E-08 |
| 2238  | ADRM1     | 1669.321962 | -0.847346795 | 0.126241 | -6.71213  | 1.92E-11 | 1.68E-10 |
| 8462  | LRRC56    | 35.91552047 | -0.847517078 | 0.263044 | -3.22196  | 0.001273 | 0.002949 |
| 16017 | GPR12     | 0.307258614 | -0.847634164 | 1.200177 | -0.706258 | 0.480028 | 0.587403 |
| 3645  | IKBIP     | 1474.643228 | -0.847673283 | 0.152029 | -5.575717 | 2.47E-08 | 1.33E-07 |
| 3426  | RPSAP58   | 5954.053768 | -0.848229428 | 0.148155 | -5.725283 | 1.03E-08 | 5.91E-08 |
| 11473 | S100A1    | 2032.290856 | -0.848439725 | 0.398621 | -2.128438 | 0.033301 | 0.056893 |
| 6661  | MFGE8     | 2194.082292 | -0.84876456  | 0.214486 | -3.957195 | 7.58E-05 | 0.000223 |
| 2909  | C1orf35   | 211.1380101 | -0.84894403  | 0.139082 | -6.103891 | 1.04E-09 | 6.98E-09 |
| 14876 | PTCHD3    | 0.327319542 | -0.849064632 | 0.813446 | -1.043788 | 0.296584 | 0.390786 |
| 11651 | YBX2      | 67.27982144 | -0.849277629 | 0.412105 | -2.06083  | 0.039319 | 0.066148 |
| 13315 | LCN2      | 42.24623592 | -0.849341739 | 0.552001 | -1.53866  | 0.123887 | 0.182374 |
| 8857  | CBS       | 209.5396066 | -0.849411007 | 0.276897 | -3.06761  | 0.002158 | 0.004775 |
| 2128  | THG1L     | 248.1076417 | -0.849512975 | 0.12449  | -6.823942 | 8.86E-12 | 8.16E-11 |
| 3639  | IFFO1     | 463.2430554 | -0.849514088 | 0.152296 | -5.578033 | 2.43E-08 | 1.31E-07 |
| 1216  | AP4M1     | 373.3967276 | -0.849715224 | 0.106247 | -7.997541 | 1.27E-15 | 2.04E-14 |
| 7975  | MGC12916  | 5.906689225 | -0.849742636 | 0.248457 | -3.420073 | 0.000626 | 0.001539 |
| 4098  | POR       | 2143.442664 | -0.849962644 | 0.16092  | -5.281909 | 1.28E-07 | 6.11E-07 |
| 9362  | CD3G      | 66.83798064 | -0.849974385 | 0.295562 | -2.87579  | 0.00403  | 0.008438 |
| 9667  | CFLP1     | 2.035993751 | -0.850328078 | 0.308247 | -2.758594 | 0.005805 | 0.01177  |
| 10034 | BEND4     | 4.585907685 | -0.85045212  | 0.322077 | -2.640525 | 0.008278 | 0.01617  |
| 7396  | GNG3      | 5.042067169 | -0.850528271 | 0.232475 | -3.658581 | 0.000254 | 0.000672 |
| 2546  | C2orf79   | 298.6058128 | -0.85052935  | 0.132315 | -6.428065 | 1.29E-10 | 9.95E-10 |
| 754   | EDEM2     | 1061.827619 | -0.850807472 | 0.095849 | -8.876529 | 6.90E-19 | 1.79E-17 |
| 5354  | ABCB9     | 115.1002538 | -0.850864597 | 0.185291 | -4.592056 | 4.39E-06 | 1.61E-05 |
| 15050 | A2BP1     | 1.632153979 | -0.850943519 | 0.859392 | -0.99017  | 0.322091 | 0.419461 |
| 7407  | DMC1      | 9.969370815 | -0.851702842 | 0.233131 | -3.653327 | 0.000259 | 0.000685 |
| 7041  | XAF1      | 1119.899857 | -0.851734267 | 0.223943 | -3.803357 | 0.000143 | 0.000397 |
| 2766  | EMG1      | 598.2313123 | -0.852009401 | 0.136905 | -6.223381 | 4.87E-10 | 3.45E-09 |
| 15219 | HIST1H2BM | 0.305456364 | -0.852274197 | 0.903935 | -0.942849 | 0.345758 | 0.445312 |
| 3878  | FAM109B   | 207.0702282 | -0.852474689 | 0.157409 | -5.415677 | 6.11E-08 | 3.09E-07 |
| 7354  | LAMA3     | 485.0339627 | -0.852629428 | 0.231924 | -3.67633  | 0.000237 | 0.000631 |
| 2500  | PLEKHO2   | 1599.936225 | -0.852631118 | 0.131942 | -6.46217  | 1.03E-10 | 8.09E-10 |
| 8773  | SOX30     | 3.111042201 | -0.852748935 | 0.275532 | -3.094915 | 0.001969 | 0.004399 |
| 6555  | LINGO1    | 364.786008  | -0.852896498 | 0.212976 | -4.00466  | 6.21E-05 | 0.000186 |
| 9608  | CSPG5     | 13.94850076 | -0.852917667 | 0.307156 | -2.776823 | 0.005489 | 0.011199 |
| 5407  | COL4A1    | 27940.26982 | -0.853055475 | 0.187051 | -4.560552 | 5.10E-06 | 1.85E-05 |
| 3364  | OCEL1     | 391.6094172 | -0.853481501 | 0.147931 | -5.769471 | 7.95E-09 | 4.63E-08 |
| 7911  | RHOF      | 321.6761959 | -0.853730346 | 0.247854 | -3.444485 | 0.000572 | 0.001418 |
| 4821  | GATSL3    | 233.1538952 | -0.853843357 | 0.174984 | -4.879539 | 1.06E-06 | 4.32E-06 |
| 8279  | BIRC3     | 3075.74006  | -0.853893486 | 0.25867  | -3.301093 | 0.000963 | 0.00228  |
| 11454 | CYP8B1    | 216.0424587 | -0.853944154 | 0.400272 | -2.133408 | 0.032891 | 0.056286 |
| 6740  | ACRC      | 22.00160277 | -0.853973661 | 0.217549 | -3.925426 | 8.66E-05 | 0.000252 |
| 4784  | NTHL1     | 172.0518611 | -0.854178713 | 0.174575 | -4.892904 | 9.94E-07 | 4.07E-06 |
| 11122 | GFI1B     | 1.180336539 | -0.854382965 | 0.38064  | -2.244594 | 0.024794 | 0.04369  |

|       |          |             |              |          |           |          |          |
|-------|----------|-------------|--------------|----------|-----------|----------|----------|
| 13032 | SULT4A1  | 19.96248863 | -0.854584885 | 0.522921 | -1.634251 | 0.102206 | 0.153725 |
| 3249  | ZDHC24   | 370.3592348 | -0.854711419 | 0.146023 | -5.853262 | 4.82E-09 | 2.91E-08 |
| 2418  | STX10    | 299.8391018 | -0.854742668 | 0.130678 | -6.540815 | 6.12E-11 | 4.96E-10 |
| 10540 | GRPR     | 9.88195009  | -0.855460031 | 0.348299 | -2.45611  | 0.014045 | 0.026119 |
| 7512  | GFI1     | 54.15959447 | -0.855679406 | 0.236881 | -3.612275 | 0.000304 | 0.000792 |
| 4909  | C17orf67 | 16.58587188 | -0.855770032 | 0.177469 | -4.822074 | 1.42E-06 | 5.67E-06 |
| 10890 | PLAC8L1  | 2.364098779 | -0.855822632 | 0.368349 | -2.3234   | 0.020158 | 0.036282 |
| 7988  | PLD4     | 183.6046561 | -0.856037882 | 0.25071  | -3.414461 | 0.000639 | 0.001568 |
| 1514  | HAUS8    | 80.16982251 | -0.856216797 | 0.113419 | -7.549149 | 4.38E-14 | 5.67E-13 |
| 9299  | EGR2     | 303.8540488 | -0.85625887  | 0.295172 | -2.900886 | 0.003721 | 0.007844 |
| 4490  | MICB     | 132.7227131 | -0.856517535 | 0.169738 | -5.046129 | 4.51E-07 | 1.97E-06 |
| 1513  | PIGT     | 3018.719783 | -0.857474191 | 0.11357  | -7.550149 | 4.35E-14 | 5.63E-13 |
| 5392  | ZNF608   | 633.4341353 | -0.857694468 | 0.187648 | -4.570764 | 4.86E-06 | 1.77E-05 |
| 12212 | NUP210L  | 0.759193136 | -0.858218572 | 0.453514 | -1.892377 | 0.058441 | 0.093797 |
| 11096 | CPS1     | 127.7963955 | -0.85827496  | 0.380346 | -2.256562 | 0.024035 | 0.042458 |
| 15627 | MPRSS11  | 0.273057922 | -0.858405881 | 1.037809 | -0.827133 | 0.408162 | 0.511959 |
| 1620  | C11orf10 | 1191.253974 | -0.858421542 | 0.115983 | -7.401251 | 1.35E-13 | 1.63E-12 |
| 16915 | TEX101   | 0.250654709 | -0.858568349 | 1.863819 | -0.46065  | 0.64505  | 0.74748  |
| 16743 | CLEC3A   | 0.219312936 | -0.85856865  | 1.69113  | -0.507689 | 0.611671 | 0.716082 |
| 17284 | HELT     | 0.182121252 | -0.858568704 | 2.309879 | -0.371694 | 0.710121 | 0.805291 |
| 16095 | KCNQ2    | 0.254743659 | -0.858568769 | 1.257666 | -0.682668 | 0.494816 | 0.602603 |
| 15891 | NPBWR1   | 0.252411889 | -0.858568826 | 1.151849 | -0.745383 | 0.45604  | 0.56251  |
| 15754 | CTRB2    | 0.248849176 | -0.858568857 | 1.088967 | -0.788425 | 0.430448 | 0.53556  |
| 15901 | PLA2G4E  | 0.235717566 | -0.858568862 | 1.157239 | -0.741911 | 0.458141 | 0.564719 |
| 16392 | TLX2     | 0.175246506 | -0.858568904 | 1.424768 | -0.602603 | 0.546773 | 0.653823 |
| 3621  | NENF     | 1301.295182 | -0.858721951 | 0.15357  | -5.591745 | 2.25E-08 | 1.22E-07 |
| 4293  | WDR13    | 2858.836246 | -0.859134636 | 0.166506 | -5.159797 | 2.47E-07 | 1.13E-06 |
| 12579 | SEZ6     | 0.817081684 | -0.859203122 | 0.482954 | -1.779059 | 0.07523  | 0.117226 |
| 2717  | GALNS    | 707.6108455 | -0.859213851 | 0.137125 | -6.265896 | 3.71E-10 | 2.67E-09 |
| 16738 | GH2      | 0.295132276 | -0.859741718 | 1.688003 | -0.509325 | 0.610525 | 0.714911 |
| 9799  | CYB5R2   | 73.23118755 | -0.859878724 | 0.31647  | -2.717092 | 0.006586 | 0.013174 |
| 10567 | WNK4     | 124.7837102 | -0.860671318 | 0.351639 | -2.447601 | 0.014381 | 0.026676 |
| 7356  | SDC1     | 4546.33895  | -0.861136668 | 0.234272 | -3.675801 | 0.000237 | 0.000632 |
| 13152 | GFRA3    | 1.821418726 | -0.861306517 | 0.540339 | -1.594012 | 0.110933 | 0.165329 |
| 1276  | SP140L   | 429.4048517 | -0.861804506 | 0.109167 | -7.894373 | 2.92E-15 | 4.48E-14 |
| 7300  | TRO      | 229.4946117 | -0.862012292 | 0.232985 | -3.69987  | 0.000216 | 0.000579 |
| 7830  | OR2A4    | 87.89560035 | -0.862507449 | 0.247414 | -3.486094 | 0.00049  | 0.001227 |
| 4469  | PLEKHG2  | 1041.435425 | -0.862609013 | 0.170583 | -5.05684  | 4.26E-07 | 1.87E-06 |
| 14596 | PSG1     | 0.929702836 | -0.862962661 | 0.759354 | -1.136443 | 0.255771 | 0.343476 |
| 2259  | LSM10    | 402.9781958 | -0.863161326 | 0.129039 | -6.689131 | 2.24E-11 | 1.95E-10 |
| 736   | CHST12   | 430.6764895 | -0.863201244 | 0.096711 | -8.925588 | 4.43E-19 | 1.18E-17 |
| 3460  | ARFGAP1  | 1552.099774 | -0.864121357 | 0.151614 | -5.6995   | 1.20E-08 | 6.81E-08 |
| 5597  | PVRIG    | 98.7600147  | -0.864610633 | 0.193285 | -4.47324  | 7.70E-06 | 2.70E-05 |
| 1575  | ETV6     | 959.9473551 | -0.864715596 | 0.115886 | -7.461752 | 8.54E-14 | 1.06E-12 |
| 6774  | HSP90B3P | 7.669205287 | -0.864760908 | 0.221205 | -3.909323 | 9.26E-05 | 0.000268 |
| 9797  | ZG16B    | 8.421500264 | -0.865036978 | 0.318339 | -2.717347 | 0.006581 | 0.013166 |
| 10730 | ADAM32   | 7.727896606 | -0.865839852 | 0.362705 | -2.387171 | 0.016979 | 0.031016 |

|       |           |             |              |          |           |          |          |
|-------|-----------|-------------|--------------|----------|-----------|----------|----------|
| 7351  | CTRL      | 14.15806564 | -0.866042475 | 0.235336 | -3.680027 | 0.000233 | 0.000622 |
| 12945 | SLC7A5P1  | 0.548397902 | -0.866248044 | 0.5216   | -1.66075  | 0.096764 | 0.146517 |
| 4021  | TP53I13   | 703.0158496 | -0.866480546 | 0.162629 | -5.327953 | 9.93E-08 | 4.84E-07 |
| 4197  | RPL24     | 11139.57062 | -0.866734502 | 0.166288 | -5.21225  | 1.87E-07 | 8.71E-07 |
| 9803  | IKZF3     | 39.52743521 | -0.867081403 | 0.319284 | -2.715709 | 0.006613 | 0.013223 |
| 1464  | DNASE2    | 1858.961954 | -0.867152039 | 0.11377  | -7.621978 | 2.50E-14 | 3.34E-13 |
| 3884  | LOC388955 | 631.7549086 | -0.867584269 | 0.160282 | -5.412853 | 6.20E-08 | 3.13E-07 |
| 7078  | C3orf54   | 90.42332273 | -0.867618024 | 0.228795 | -3.792123 | 0.000149 | 0.000414 |
| 1272  | EIF3B     | 4129.788172 | -0.868251578 | 0.109939 | -7.897603 | 2.84E-15 | 4.38E-14 |
| 1326  | NUTF2     | 1897.96841  | -0.868279787 | 0.110893 | -7.829882 | 4.88E-15 | 7.22E-14 |
| 10200 | C12orf63  | 2.360732053 | -0.868480304 | 0.336339 | -2.582156 | 0.009819 | 0.018868 |
| 7989  | PDE6G     | 24.53928427 | -0.868864159 | 0.25447  | -3.414413 | 0.000639 | 0.001568 |
| 4964  | NDUFS5    | 2859.679782 | -0.8688838   | 0.181375 | -4.790538 | 1.66E-06 | 6.57E-06 |
| 7629  | TMEM184A  | 297.9781711 | -0.868932662 | 0.243541 | -3.567913 | 0.00036  | 0.000925 |
| 6462  | RUNX3     | 455.8738121 | -0.868991142 | 0.214886 | -4.043961 | 5.26E-05 | 0.000159 |
| 1841  | RPL19     | 19985.36378 | -0.869217731 | 0.121621 | -7.14692  | 8.87E-13 | 9.44E-12 |
| 2248  | SCNM1     | 474.3285239 | -0.869523287 | 0.129787 | -6.699595 | 2.09E-11 | 1.82E-10 |
| 9790  | SPAG17    | 141.2655772 | -0.869525581 | 0.319764 | -2.719273 | 0.006543 | 0.013099 |
| 12869 | WNT2      | 15.66021237 | -0.869566594 | 0.515303 | -1.687487 | 0.09151  | 0.13938  |
| 9529  | VWA5B2    | 5.489793393 | -0.869669021 | 0.309809 | -2.807112 | 0.004999 | 0.010282 |
| 534   | SHISA5    | 3613.426898 | -0.869724076 | 0.091451 | -9.510246 | 1.90E-21 | 6.98E-20 |
| 6448  | MPEG1     | 1362.650106 | -0.869980136 | 0.21476  | -4.050947 | 5.10E-05 | 0.000155 |
| 6025  | FAM83H    | 878.8943598 | -0.870815653 | 0.204675 | -4.254624 | 2.09E-05 | 6.81E-05 |
| 4833  | ZNF593    | 258.213211  | -0.87099372  | 0.178728 | -4.873286 | 1.10E-06 | 4.45E-06 |
| 4393  | RIPK3     | 84.34293409 | -0.871008518 | 0.170527 | -5.107735 | 3.26E-07 | 1.45E-06 |
| 5876  | TMEM163   | 105.8688642 | -0.871040269 | 0.200955 | -4.334505 | 1.46E-05 | 4.87E-05 |
| 4386  | C17orf89  | 289.4866557 | -0.87122643  | 0.170428 | -5.112    | 3.19E-07 | 1.42E-06 |
| 1776  | GYS1      | 2295.482285 | -0.871594802 | 0.120902 | -7.20912  | 5.63E-13 | 6.22E-12 |
| 3064  | SHARPIN   | 1107.18561  | -0.871969513 | 0.145567 | -5.990174 | 2.10E-09 | 1.34E-08 |
| 6734  | MS4A7     | 1396.90097  | -0.87287553  | 0.222237 | -3.927686 | 8.58E-05 | 0.00025  |
| 12411 | PGLYRP1   | 0.986534157 | -0.872975565 | 0.476393 | -1.832468 | 0.066882 | 0.10562  |
| 10931 | MADCAM1   | 1.931216389 | -0.873087098 | 0.378073 | -2.309305 | 0.020927 | 0.037525 |
| 13861 | DAB1      | 1.540447495 | -0.873463207 | 0.639787 | -1.365241 | 0.172177 | 0.243478 |
| 2294  | SLC25A19  | 245.6125912 | -0.874173853 | 0.131265 | -6.659611 | 2.75E-11 | 2.35E-10 |
| 2237  | TCOF1     | 1069.487819 | -0.874802663 | 0.130278 | -6.714872 | 1.88E-11 | 1.65E-10 |
| 8403  | LYZ       | 4935.350581 | -0.874856852 | 0.269407 | -3.247343 | 0.001165 | 0.002717 |
| 5463  | GBAP1     | 788.752432  | -0.874891752 | 0.192858 | -4.536447 | 5.72E-06 | 2.05E-05 |
| 6314  | RPL36A    | 89.8615422  | -0.874938233 | 0.212438 | -4.118549 | 3.81E-05 | 0.000118 |
| 3115  | ZDHHC8    | 751.4882703 | -0.875168601 | 0.147051 | -5.951452 | 2.66E-09 | 1.67E-08 |
| 1522  | NCAPD2    | 992.9964874 | -0.875250085 | 0.116261 | -7.528313 | 5.14E-14 | 6.62E-13 |
| 12913 | RPE65     | 1.159513702 | -0.875337654 | 0.52444  | -1.669089 | 0.0951   | 0.144355 |
| 3128  | GNB2L1    | 33821.08257 | -0.875546663 | 0.147317 | -5.943284 | 2.79E-09 | 1.75E-08 |
| 4545  | FAIM3     | 194.9416039 | -0.876184642 | 0.174827 | -5.011714 | 5.39E-07 | 2.33E-06 |
| 10713 | MBL1P     | 7.228853822 | -0.876286655 | 0.366189 | -2.392991 | 0.016712 | 0.030576 |
| 4184  | TBX19     | 90.76924907 | -0.876877359 | 0.168062 | -5.217585 | 1.81E-07 | 8.49E-07 |
| 5594  | CSF2RB    | 353.1371812 | -0.876951522 | 0.195974 | -4.474842 | 7.65E-06 | 2.68E-05 |
| 8196  | HPDL      | 9.255297668 | -0.877452262 | 0.263209 | -3.333667 | 0.000857 | 0.00205  |



|       |           |             |              |          |           |          |          |
|-------|-----------|-------------|--------------|----------|-----------|----------|----------|
| 12414 | UGT1A8    | 63.03548394 | -0.877673347 | 0.47908  | -1.831998 | 0.066952 | 0.105713 |
| 8661  | TXNDC2    | 1.740922154 | -0.877808918 | 0.278951 | -3.146824 | 0.001651 | 0.003735 |
| 8475  | POTEE     | 3.506175078 | -0.87786006  | 0.272821 | -3.217716 | 0.001292 | 0.002989 |
| 6277  | NPAS2     | 598.6152577 | -0.877876786 | 0.211983 | -4.141267 | 3.45E-05 | 0.000108 |
| 13255 | SORCS3    | 436.9645116 | -0.877945229 | 0.561955 | -1.562304 | 0.118216 | 0.174814 |
| 4997  | EIF4EBP3  | 753.2789817 | -0.879194343 | 0.184093 | -4.775814 | 1.79E-06 | 7.02E-06 |
| 6377  | NRBP2     | 1390.542173 | -0.879208719 | 0.215033 | -4.088706 | 4.34E-05 | 0.000133 |
| 3171  | FAM109A   | 339.8738606 | -0.879556685 | 0.148971 | -5.904198 | 3.54E-09 | 2.19E-08 |
| 12766 | GYG2      | 72.44781322 | -0.879633021 | 0.51328  | -1.713748 | 0.086575 | 0.132925 |
| 13828 | OR2AE1    | 0.416656393 | -0.879681845 | 0.639466 | -1.375651 | 0.16893  | 0.239455 |
| 2809  | C2orf24   | 1489.188934 | -0.879872623 | 0.142341 | -6.181459 | 6.35E-10 | 4.43E-09 |
| 14259 | RPRM      | 3.341126817 | -0.880130968 | 0.709311 | -1.240825 | 0.21467  | 0.295113 |
| 9674  | C6orf208  | 7.866196558 | -0.880137306 | 0.319416 | -2.755456 | 0.005861 | 0.011875 |
| 6919  | CXCR7     | 2121.707758 | -0.880268723 | 0.228249 | -3.856608 | 0.000115 | 0.000326 |
| 6939  | CNRNA0020 | 5.316499539 | -0.880482808 | 0.228788 | -3.848462 | 0.000119 | 0.000336 |
| 8808  | BRSK1     | 42.69776987 | -0.880511198 | 0.28548  | -3.08432  | 0.00204  | 0.00454  |
| 14197 | KLK6      | 3.567897434 | -0.881166623 | 0.700126 | -1.258583 | 0.208181 | 0.287424 |
| 6280  | RIMBP3C   | 4.03728657  | -0.881218849 | 0.212854 | -4.140013 | 3.47E-05 | 0.000108 |
| 2325  | RPL13A    | 14740.47519 | -0.881276116 | 0.132858 | -6.633239 | 3.28E-11 | 2.77E-10 |
| 7365  | SARDH     | 196.0445468 | -0.88282177  | 0.240373 | -3.672717 | 0.00024  | 0.000639 |
| 8623  | COMTD1    | 267.7963373 | -0.883023792 | 0.278876 | -3.166363 | 0.001544 | 0.003509 |
| 5558  | AURKC     | 12.55934066 | -0.883135124 | 0.196565 | -4.492842 | 7.03E-06 | 2.48E-05 |
| 12882 | CLEC4C    | 0.485816454 | -0.883556147 | 0.526137 | -1.679326 | 0.093089 | 0.141642 |
| 3524  | TRABD     | 702.9199726 | -0.883565653 | 0.15621  | -5.656265 | 1.55E-08 | 8.60E-08 |
| 1295  | FKBP9     | 4328.746046 | -0.883864678 | 0.112289 | -7.871346 | 3.51E-15 | 5.31E-14 |
| 12546 | OR3A2     | 0.856956096 | -0.883879046 | 0.493228 | -1.792028 | 0.073128 | 0.114242 |
| 7964  | IL1RAP    | 514.2506284 | -0.884104131 | 0.258272 | -3.423154 | 0.000619 | 0.001523 |
| 10966 | PSPN      | 0.895203411 | -0.885184709 | 0.385169 | -2.298174 | 0.021552 | 0.038523 |
| 5375  | OAS2      | 1256.704609 | -0.885409026 | 0.193375 | -4.57871  | 4.68E-06 | 1.71E-05 |
| 3570  | SLC25A37  | 690.3893984 | -0.88606423  | 0.157554 | -5.623869 | 1.87E-08 | 1.03E-07 |
| 6374  | RPL31P11  | 3.596591538 | -0.886180845 | 0.216617 | -4.091009 | 4.30E-05 | 0.000132 |
| 3902  | C6orf1    | 326.181436  | -0.886402618 | 0.164036 | -5.403711 | 6.53E-08 | 3.28E-07 |
| 7261  | BCL11B    | 134.5845995 | -0.886483179 | 0.238176 | -3.721971 | 0.000198 | 0.000534 |
| 11638 | HOXA13    | 33.6534946  | -0.886489538 | 0.429306 | -2.064939 | 0.038929 | 0.065565 |
| 1003  | DYRK4     | 340.0191479 | -0.886808346 | 0.106326 | -8.34044  | 7.40E-17 | 1.45E-15 |
| 10105 | STRC      | 14.57353347 | -0.886840498 | 0.339166 | -2.614765 | 0.008929 | 0.01732  |
| 6112  | TTYH3     | 6737.265135 | -0.886988747 | 0.210443 | -4.214875 | 2.50E-05 | 8.01E-05 |
| 11515 | ATP10B    | 5.620148124 | -0.887074127 | 0.420105 | -2.111556 | 0.034725 | 0.059109 |
| 1785  | SMAP2     | 1357.234507 | -0.887242552 | 0.123177 | -7.202983 | 5.89E-13 | 6.47E-12 |
| 8086  | C3orf67   | 98.36843771 | -0.887317469 | 0.262823 | -3.376105 | 0.000735 | 0.001782 |
| 8921  | CAPN12    | 967.4515382 | -0.887354449 | 0.291553 | -3.043543 | 0.002338 | 0.005137 |
| 13342 | FLJ42393  | 2.039475074 | -0.887792411 | 0.579726 | -1.531401 | 0.12567  | 0.184625 |
| 8096  | ZNF831    | 56.00719774 | -0.887794421 | 0.263192 | -3.373187 | 0.000743 | 0.001799 |
| 3325  | ZWINT     | 234.3009152 | -0.887956639 | 0.153074 | -5.800846 | 6.60E-09 | 3.89E-08 |
| 8784  | LDHAL6B   | 2.560293894 | -0.888024276 | 0.287281 | -3.091135 | 0.001994 | 0.004449 |
| 3156  | RNPEPL1   | 2410.006597 | -0.888612096 | 0.150229 | -5.915058 | 3.32E-09 | 2.06E-08 |
| 3048  | EZH2      | 149.0086717 | -0.888750682 | 0.148052 | -6.002946 | 1.94E-09 | 1.25E-08 |

|       |           |             |              |          |           |          |          |
|-------|-----------|-------------|--------------|----------|-----------|----------|----------|
| 3247  | ERGIC1    | 9943.523125 | -0.889489995 | 0.151952 | -5.853765 | 4.81E-09 | 2.90E-08 |
| 9771  | DNAJC12   | 140.6579306 | -0.889580819 | 0.326519 | -2.724442 | 0.006441 | 0.012921 |
| 1550  | ARF5      | 2575.588005 | -0.889868878 | 0.118776 | -7.491995 | 6.78E-14 | 8.58E-13 |
| 6517  | CD244     | 52.02868014 | -0.890154815 | 0.221424 | -4.020133 | 5.82E-05 | 0.000175 |
| 4705  | GBP2      | 3282.80347  | -0.890182138 | 0.180603 | -4.928939 | 8.27E-07 | 3.44E-06 |
| 7418  | LRP3      | 660.4976997 | -0.890491647 | 0.244029 | -3.649127 | 0.000263 | 0.000695 |
| 12908 | OR7D2     | 4.642152699 | -0.891442385 | 0.533324 | -1.671484 | 0.094626 | 0.143691 |
| 11359 | SFTPA2    | 1.061245571 | -0.891460514 | 0.41198  | -2.163844 | 0.030476 | 0.05259  |
| 11047 | KCTD4     | 14.8576678  | -0.892167562 | 0.392285 | -2.274283 | 0.022949 | 0.040719 |
| 2824  | CCDC137   | 413.8158491 | -0.892236561 | 0.144674 | -6.167213 | 6.95E-10 | 4.82E-09 |
| 2512  | TFAP4     | 170.615848  | -0.892239837 | 0.138295 | -6.451705 | 1.11E-10 | 8.63E-10 |
| 3929  | YDJC      | 389.4466506 | -0.892277259 | 0.165711 | -5.384524 | 7.26E-08 | 3.62E-07 |
| 3481  | OSBPL5    | 551.2448018 | -0.892444584 | 0.15694  | -5.686526 | 1.30E-08 | 7.30E-08 |
| 7587  | NOV       | 553.0080526 | -0.892716517 | 0.24908  | -3.584049 | 0.000338 | 0.000874 |
| 13519 | PLA2G10   | 0.553186462 | -0.89299983  | 0.602717 | -1.481623 | 0.138441 | 0.200728 |
| 8421  | DBH       | 10.11859314 | -0.893271335 | 0.275463 | -3.242796 | 0.001184 | 0.002755 |
| 12071 | TBX10     | 0.80284089  | -0.89348042  | 0.461041 | -1.937963 | 0.052628 | 0.085457 |
| 9440  | OSR2      | 27.49626596 | -0.893577677 | 0.314464 | -2.841593 | 0.004489 | 0.009321 |
| 7274  | NRGN      | 204.3886694 | -0.893631279 | 0.240675 | -3.713025 | 0.000205 | 0.000552 |
| 2834  | ARHGDIB   | 5347.265554 | -0.893872237 | 0.145131 | -6.15907  | 7.32E-10 | 5.06E-09 |
| 5799  | HMGA1     | 550.2327009 | -0.894293961 | 0.204444 | -4.374265 | 1.22E-05 | 4.12E-05 |
| 6133  | HPGDS     | 35.35722248 | -0.894467541 | 0.212628 | -4.206734 | 2.59E-05 | 8.28E-05 |
| 2321  | SF3A2     | 968.2809139 | -0.894659485 | 0.134735 | -6.640149 | 3.13E-11 | 2.65E-10 |
| 6251  | DACT3     | 168.0636582 | -0.894709748 | 0.215367 | -4.154357 | 3.26E-05 | 0.000102 |
| 8044  | CCR1      | 489.649387  | -0.895029786 | 0.263659 | -3.394653 | 0.000687 | 0.001674 |
| 2556  | C19orf28  | 1489.95123  | -0.896233875 | 0.139599 | -6.420071 | 1.36E-10 | 1.04E-09 |
| 3532  | EHBP1L1   | 1123.529106 | -0.896308688 | 0.158782 | -5.644893 | 1.65E-08 | 9.17E-08 |
| 4199  | PYCRL     | 338.8395717 | -0.896523078 | 0.172031 | -5.211403 | 1.87E-07 | 8.75E-07 |
| 10340 | CDCP2     | 1.257574276 | -0.896752416 | 0.354029 | -2.532993 | 0.011309 | 0.021438 |
| 10263 | TP73      | 17.650414   | -0.897157792 | 0.350357 | -2.560698 | 0.010446 | 0.019951 |
| 3714  | PFDN5     | 7823.362585 | -0.897276173 | 0.162274 | -5.529384 | 3.21E-08 | 1.70E-07 |
| 8525  | POU5F1B   | 84.38240685 | -0.897471974 | 0.28083  | -3.195788 | 0.001394 | 0.003206 |
| 2339  | GRAMD1A   | 1435.668302 | -0.897769221 | 0.135668 | -6.617406 | 3.66E-11 | 3.06E-10 |
| 11077 | THPO      | 80.2487748  | -0.898161889 | 0.396704 | -2.264058 | 0.023571 | 0.041709 |
| 7800  | CEP170L   | 3.403712996 | -0.898190025 | 0.256491 | -3.501836 | 0.000462 | 0.001161 |
| 15321 | SBK2      | 0.554226416 | -0.898666883 | 0.982634 | -0.914549 | 0.360429 | 0.461116 |
| 2768  | DC1002867 | 170.546865  | -0.898681499 | 0.144428 | -6.222368 | 4.90E-10 | 3.47E-09 |
| 3416  | SUV420H2  | 101.8450228 | -0.898974786 | 0.156682 | -5.73756  | 9.61E-09 | 5.51E-08 |
| 2961  | MFS10     | 1291.19805  | -0.899345566 | 0.148347 | -6.062446 | 1.34E-09 | 8.87E-09 |
| 6965  | EVPL      | 334.6068432 | -0.899542643 | 0.234195 | -3.841006 | 0.000123 | 0.000345 |
| 8829  | CCDC153   | 13.8205142  | -0.899983253 | 0.292255 | -3.079449 | 0.002074 | 0.004604 |
| 3412  | MRPS24    | 1335.778871 | -0.900547935 | 0.156884 | -5.740229 | 9.45E-09 | 5.43E-08 |
| 11709 | EMID2     | 6.019520125 | -0.900567793 | 0.439252 | -2.050231 | 0.040342 | 0.067533 |
| 6733  | RRN3P2    | 21.2014366  | -0.900769008 | 0.229317 | -3.928045 | 8.56E-05 | 0.000249 |
| 4206  | VASN      | 1551.643217 | -0.900983938 | 0.173093 | -5.205188 | 1.94E-07 | 9.03E-07 |
| 7761  | CHRNA5    | 24.74607297 | -0.901059526 | 0.256439 | -3.513741 | 0.000442 | 0.001116 |
| 10316 | KIAA0319  | 43.6804727  | -0.901866825 | 0.3549   | -2.541189 | 0.011048 | 0.020991 |

|       |           |             |              |          |           |          |          |
|-------|-----------|-------------|--------------|----------|-----------|----------|----------|
| 5448  | CLEC4A    | 82.20957066 | -0.901900525 | 0.198552 | -4.542383 | 5.56E-06 | 2.00E-05 |
| 12663 | SH3GL3    | 1.088179652 | -0.902660989 | 0.515049 | -1.752573 | 0.079675 | 0.123329 |
| 3593  | MPG       | 891.1734181 | -0.902881975 | 0.160992 | -5.608244 | 2.04E-08 | 1.12E-07 |
| 2107  | C19orf22  | 1093.79498  | -0.903232091 | 0.131997 | -6.842801 | 7.77E-12 | 7.22E-11 |
| 7899  | KCNA5     | 50.79379498 | -0.903515541 | 0.261983 | -3.448751 | 0.000563 | 0.001398 |
| 2724  | PRELID1   | 2913.340342 | -0.904979911 | 0.14454  | -6.261109 | 3.82E-10 | 2.75E-09 |
| 8443  | F2RL2     | 37.83215705 | -0.905144812 | 0.28019  | -3.23047  | 0.001236 | 0.002869 |
| 5178  | SNAI3     | 33.15524449 | -0.905285236 | 0.193221 | -4.685224 | 2.80E-06 | 1.06E-05 |
| 4715  | ZCCHC24   | 621.9518013 | -0.905374609 | 0.18381  | -4.925595 | 8.41E-07 | 3.50E-06 |
| 4816  | LOC150776 | 352.9737177 | -0.905636398 | 0.185533 | -4.881269 | 1.05E-06 | 4.29E-06 |
| 7693  | C6orf97   | 64.72790544 | -0.906067363 | 0.255754 | -3.542734 | 0.000396 | 0.001009 |
| 6118  | LOC728392 | 112.8074144 | -0.906268941 | 0.215185 | -4.211575 | 2.54E-05 | 8.12E-05 |
| 6097  | NFATC4    | 437.7711531 | -0.90670747  | 0.214726 | -4.222618 | 2.41E-05 | 7.76E-05 |
| 8128  | C1orf228  | 9.347303031 | -0.906784067 | 0.269871 | -3.360062 | 0.000779 | 0.001879 |
| 7711  | NPIPL3    | 933.5055405 | -0.907322866 | 0.25666  | -3.535118 | 0.000408 | 0.001036 |
| 5784  | HEPH      | 460.9378055 | -0.907385867 | 0.207207 | -4.379119 | 1.19E-05 | 4.04E-05 |
| 7852  | KCNA3     | 33.84987558 | -0.907594686 | 0.261506 | -3.470652 | 0.000519 | 0.001296 |
| 2491  | DDX39     | 982.4217923 | -0.907964273 | 0.140222 | -6.475187 | 9.47E-11 | 7.45E-10 |
| 11757 | KRT5      | 15.32700436 | -0.908323171 | 0.446312 | -2.035177 | 0.041833 | 0.069743 |
| 10315 | TTLL6     | 156.5283741 | -0.908396394 | 0.35739  | -2.541749 | 0.01103  | 0.02096  |
| 3757  | MCM2      | 532.0627619 | -0.908466117 | 0.165099 | -5.502552 | 3.74E-08 | 1.95E-07 |
| 419   | DAGLB     | 526.1662105 | -0.908577602 | 0.091219 | -9.960407 | 2.27E-23 | 1.06E-21 |
| 6201  | LILRA2    | 79.00822295 | -0.908791526 | 0.217661 | -4.175252 | 2.98E-05 | 9.41E-05 |
| 11381 | C21orf15  | 5.120770168 | -0.908809486 | 0.421067 | -2.158346 | 0.030901 | 0.053219 |
| 5167  | UFSP1     | 25.69626443 | -0.909041366 | 0.193787 | -4.690928 | 2.72E-06 | 1.03E-05 |
| 3186  | FANCD2    | 107.6199784 | -0.909364817 | 0.154379 | -5.890476 | 3.85E-09 | 2.37E-08 |
| 13167 | HTR6      | 23.38546652 | -0.909738822 | 0.572109 | -1.59015  | 0.111801 | 0.166432 |
| 14469 | CELA1     | 0.318648764 | -0.90977012  | 0.772606 | -1.177534 | 0.238982 | 0.323747 |
| 4234  | ARID5A    | 654.8642938 | -0.909795158 | 0.175292 | -5.190174 | 2.10E-07 | 9.73E-07 |
| 11156 | TMPRSS3   | 171.4899118 | -0.909801589 | 0.406832 | -2.236307 | 0.025332 | 0.044515 |
| 10866 | ACCN4     | 2.466284518 | -0.909865156 | 0.38968  | -2.334904 | 0.019548 | 0.035263 |
| 5956  | RTN1      | 195.3014958 | -0.909891864 | 0.21224  | -4.287086 | 1.81E-05 | 5.96E-05 |
| 474   | ACP2      | 1184.256252 | -0.909992985 | 0.093601 | -9.722062 | 2.43E-22 | 1.00E-20 |
| 5034  | DC1002721 | 46.61601885 | -0.910902608 | 0.191512 | -4.75638  | 1.97E-06 | 7.67E-06 |
| 4389  | ATP6AP1L  | 50.80306269 | -0.911512882 | 0.178402 | -5.109306 | 3.23E-07 | 1.44E-06 |
| 9574  | G0S2      | 1092.391924 | -0.911681069 | 0.32673  | -2.790323 | 0.005266 | 0.01078  |
| 7511  | C3orf35   | 7.282573216 | -0.911714868 | 0.252385 | -3.612402 | 0.000303 | 0.000792 |
| 6558  | RPGRIP1   | 8.31452871  | -0.912221788 | 0.227934 | -4.002133 | 6.28E-05 | 0.000188 |
| 10380 | GP6       | 16.54046774 | -0.912251788 | 0.363087 | -2.512491 | 0.011988 | 0.022638 |
| 6681  | MEGF6     | 505.4445064 | -0.912559982 | 0.231104 | -3.948691 | 7.86E-05 | 0.000231 |
| 3533  | LOC388796 | 300.0019458 | -0.91310982  | 0.161769 | -5.644517 | 1.66E-08 | 9.19E-08 |
| 14014 | KLRG2     | 1.35845317  | -0.913169928 | 0.694605 | -1.31466  | 0.188624 | 0.263824 |
| 5148  | H2AFJ     | 1327.404884 | -0.913527699 | 0.194193 | -4.704227 | 2.55E-06 | 9.70E-06 |
| 272   | GUSB      | 2050.088985 | -0.913584806 | 0.085177 | -10.72567 | 7.71E-27 | 5.56E-25 |
| 9904  | SYCP2L    | 4.89275837  | -0.913633024 | 0.34008  | -2.686528 | 0.00722  | 0.014289 |
| 14203 | C12orf50  | 0.36205663  | -0.913801943 | 0.727791 | -1.255582 | 0.209267 | 0.288802 |
| 830   | EXOSC1    | 289.5752258 | -0.913867109 | 0.105323 | -8.676789 | 4.07E-18 | 9.61E-17 |

|       |           |             |              |          |           |          |          |
|-------|-----------|-------------|--------------|----------|-----------|----------|----------|
| 7066  | OR51E1    | 180.306548  | -0.913910562 | 0.240774 | -3.795716 | 0.000147 | 0.000408 |
| 7752  | NFE2      | 14.35687641 | -0.914163262 | 0.259831 | -3.518302 | 0.000434 | 0.001098 |
| 3914  | C6orf125  | 662.665493  | -0.91433285  | 0.169514 | -5.393833 | 6.90E-08 | 3.45E-07 |
| 2348  | FAM89B    | 837.9741537 | -0.914582983 | 0.138357 | -6.610292 | 3.84E-11 | 3.20E-10 |
| 5842  | C5orf39   | 93.9272785  | -0.914808027 | 0.210307 | -4.349879 | 1.36E-05 | 4.57E-05 |
| 8682  | MRC1      | 577.0257389 | -0.91520377  | 0.291641 | -3.13812  | 0.0017   | 0.003839 |
| 11962 | RBMXL2    | 1.344999357 | -0.915317435 | 0.464447 | -1.970769 | 0.04875  | 0.079882 |
| 6173  | HIST1H4J  | 16.19243863 | -0.915319763 | 0.218519 | -4.188736 | 2.81E-05 | 8.91E-05 |
| 697   | RCC2      | 2019.251052 | -0.915727449 | 0.101409 | -9.030018 | 1.72E-19 | 4.83E-18 |
| 11144 | FAM196A   | 10.60896337 | -0.915903593 | 0.408962 | -2.239578 | 0.025118 | 0.04418  |
| 17503 | SPANXA2   | 0.181664473 | -0.916275279 | 2.91407  | -0.314431 | 0.753193 | 0.843475 |
| 16972 | FAM181A   | 0.22978386  | -0.916275859 | 2.057995 | -0.445227 | 0.656155 | 0.757795 |
| 16997 | SLCO1B1   | 0.180106834 | -0.916276083 | 2.082531 | -0.439982 | 0.65995  | 0.761057 |
| 15911 | IL1F8     | 0.245871887 | -0.916276492 | 1.240662 | -0.738538 | 0.460187 | 0.566912 |
| 15560 | OSTN      | 0.216690573 | -0.916276627 | 1.08505  | -0.844456 | 0.398415 | 0.50187  |
| 5065  | TMEM154   | 65.44846247 | -0.916792166 | 0.193453 | -4.739106 | 2.15E-06 | 8.31E-06 |
| 3952  | FBXL6     | 288.79109   | -0.917367825 | 0.170697 | -5.374252 | 7.69E-08 | 3.81E-07 |
| 9528  | HAPLN1    | 384.2579462 | -0.917450535 | 0.326818 | -2.807225 | 0.004997 | 0.01028  |
| 6948  | NT5DC3    | 987.9824116 | -0.917813121 | 0.238676 | -3.845443 | 0.00012  | 0.000339 |
| 2667  | RPL35A    | 10028.9667  | -0.917828041 | 0.145337 | -6.315174 | 2.70E-10 | 1.98E-09 |
| 9048  | INHBC     | 6.641002666 | -0.918440844 | 0.30651  | -2.996448 | 0.002731 | 0.005917 |
| 335   | PABPC4    | 2671.668897 | -0.918748032 | 0.088511 | -10.38002 | 3.06E-25 | 1.79E-23 |
| 3433  | STYXL1    | 538.1743167 | -0.919403924 | 0.160689 | -5.721647 | 1.05E-08 | 6.02E-08 |
| 9174  | FAM177B   | 6.277276088 | -0.919685009 | 0.312024 | -2.94748  | 0.003204 | 0.006845 |
| 9005  | PSORS1C2  | 8.737642712 | -0.919867321 | 0.305631 | -3.009728 | 0.002615 | 0.005692 |
| 6732  | C2orf65   | 14.82705537 | -0.919873981 | 0.234171 | -3.928211 | 8.56E-05 | 0.000249 |
| 8319  | BREA2     | 3.07834636  | -0.920411382 | 0.280336 | -3.283246 | 0.001026 | 0.002417 |
| 4929  | CD320     | 890.5746542 | -0.920491349 | 0.19131  | -4.81151  | 1.50E-06 | 5.96E-06 |
| 2799  | TUBB6     | 1831.532034 | -0.92049547  | 0.148651 | -6.192342 | 5.93E-10 | 4.15E-09 |
| 6477  | GHRLOS    | 10.71726574 | -0.920536127 | 0.228003 | -4.037392 | 5.40E-05 | 0.000164 |
| 10987 | PMCH      | 15.04767624 | -0.920569905 | 0.401712 | -2.291614 | 0.021928 | 0.03912  |
| 8100  | LOC440461 | 3.288007801 | -0.920602943 | 0.273078 | -3.371208 | 0.000748 | 0.001811 |
| 9263  | RPS27     | 664.1335664 | -0.921577699 | 0.316491 | -2.91186  | 0.003593 | 0.007603 |
| 13705 | LOC646627 | 0.645085568 | -0.922374694 | 0.651075 | -1.416695 | 0.156572 | 0.223931 |
| 2428  | RPL12     | 10094.11473 | -0.922635326 | 0.141184 | -6.534965 | 6.36E-11 | 5.14E-10 |
| 4209  | FAM53A    | 18.10671834 | -0.922676004 | 0.177327 | -5.203258 | 1.96E-07 | 9.12E-07 |
| 3466  | KIAA1274  | 621.0749844 | -0.923001708 | 0.161996 | -5.69768  | 1.21E-08 | 6.87E-08 |
| 9388  | MIR155HG  | 82.0218407  | -0.923313599 | 0.322392 | -2.86395  | 0.004184 | 0.008736 |
| 1669  | MCM7      | 1463.362205 | -0.923704917 | 0.125892 | -7.337295 | 2.18E-13 | 2.56E-12 |
| 10140 | MYOZ2     | 1.401088444 | -0.923937266 | 0.355086 | -2.602011 | 0.009268 | 0.017915 |
| 4597  | FAM156A   | 819.6480923 | -0.924220152 | 0.185249 | -4.989082 | 6.07E-07 | 2.59E-06 |
| 7443  | WFDC1     | 118.8544775 | -0.924372679 | 0.254033 | -3.638793 | 0.000274 | 0.000721 |
| 3856  | CARHSP1   | 2888.796846 | -0.924377521 | 0.170287 | -5.428341 | 5.69E-08 | 2.89E-07 |
| 2389  | DBNDD2    | 704.1772702 | -0.924744139 | 0.140763 | -6.569521 | 5.05E-11 | 4.14E-10 |
| 13549 | VIT       | 0.859700528 | -0.924782516 | 0.628586 | -1.471212 | 0.141234 | 0.204319 |
| 9548  | HEPHL1    | 3.49607262  | -0.924883872 | 0.330086 | -2.801945 | 0.00508  | 0.010428 |
| 6164  | KHDC1     | 19.53418145 | -0.925101612 | 0.220539 | -4.194736 | 2.73E-05 | 8.69E-05 |

|       |           |             |              |          |           |          |          |
|-------|-----------|-------------|--------------|----------|-----------|----------|----------|
| 7858  | SGCG      | 2.360555547 | -0.925494329 | 0.266857 | -3.468133 | 0.000524 | 0.001307 |
| 7187  | C14orf176 | 21.04133381 | -0.925634261 | 0.246841 | -3.749916 | 0.000177 | 0.000482 |
| 1769  | ZNF668    | 211.9234359 | -0.92584486  | 0.128193 | -7.222274 | 5.11E-13 | 5.66E-12 |
| 7272  | DC1001336 | 12.23888037 | -0.925879276 | 0.249329 | -3.71348  | 0.000204 | 0.000551 |
| 9030  | C6orf147  | 6.980666982 | -0.926300318 | 0.308554 | -3.002072 | 0.002681 | 0.005821 |
| 7896  | GZMA      | 383.8743191 | -0.926451969 | 0.26848  | -3.450726 | 0.000559 | 0.001388 |
| 6515  | TCF19     | 712.1808701 | -0.926655702 | 0.230424 | -4.021521 | 5.78E-05 | 0.000174 |
| 3668  | AGTRAP    | 1065.929942 | -0.926755336 | 0.166817 | -5.555519 | 2.77E-08 | 1.48E-07 |
| 2678  | ARL6IP4   | 3101.494578 | -0.926797808 | 0.147131 | -6.299117 | 2.99E-10 | 2.19E-09 |
| 1152  | OST4      | 2462.334447 | -0.926836989 | 0.114627 | -8.085674 | 6.18E-16 | 1.05E-14 |
| 1086  | AP2S1     | 1266.587773 | -0.927974878 | 0.113434 | -8.180777 | 2.82E-16 | 5.09E-15 |
| 7588  | FKBP5     | 5049.710128 | -0.928573767 | 0.259134 | -3.583372 | 0.000339 | 0.000876 |
| 10453 | ITGAD     | 30.70652637 | -0.92864641  | 0.372764 | -2.491245 | 0.01273  | 0.02387  |
| 10031 | BHLHA15   | 11.722707   | -0.928659133 | 0.351595 | -2.641272 | 0.00826  | 0.016139 |
| 13875 | KDM5D     | 371.4623829 | -0.92868707  | 0.682928 | -1.35986  | 0.173874 | 0.245635 |
| 10687 | FER1L5    | 3.277764194 | -0.928707436 | 0.386787 | -2.40108  | 0.016347 | 0.029982 |
| 11918 | KRT1      | 2.82581138  | -0.929102217 | 0.468596 | -1.982735 | 0.047397 | 0.077952 |
| 10387 | FAM3D     | 5.242782743 | -0.92942658  | 0.370163 | -2.510856 | 0.012044 | 0.022728 |
| 1359  | OBFC2B    | 762.4244132 | -0.930181255 | 0.119548 | -7.78085  | 7.20E-15 | 1.04E-13 |
| 5744  | C16orf54  | 90.65000873 | -0.930346788 | 0.211423 | -4.400411 | 1.08E-05 | 3.69E-05 |
| 2796  | RPS17     | 11042.86749 | -0.930385423 | 0.150176 | -6.195301 | 5.82E-10 | 4.08E-09 |
| 2179  | UBA52     | 8699.533894 | -0.931183474 | 0.137364 | -6.778952 | 1.21E-11 | 1.09E-10 |
| 13808 | DNMT3L    | 0.972712253 | -0.931511558 | 0.672927 | -1.384269 | 0.166276 | 0.236036 |
| 9135  | PCSK6     | 4256.609255 | -0.931608929 | 0.314246 | -2.964588 | 0.003031 | 0.006503 |
| 12119 | WDR49     | 0.631409683 | -0.931848147 | 0.484627 | -1.922816 | 0.054503 | 0.088152 |
| 3381  | RPS14     | 18306.30813 | -0.931882956 | 0.161817 | -5.758861 | 8.47E-09 | 4.91E-08 |
| 11116 | ALOX12P2  | 15.26405693 | -0.932013953 | 0.414881 | -2.246458 | 0.024675 | 0.043509 |
| 2112  | QPCTL     | 246.3457103 | -0.932512975 | 0.136423 | -6.835472 | 8.17E-12 | 7.59E-11 |
| 6516  | ESPL1     | 140.1512432 | -0.932720491 | 0.231957 | -4.021085 | 5.79E-05 | 0.000174 |
| 6354  | SHC4      | 14.71592532 | -0.932976134 | 0.227597 | -4.099241 | 4.15E-05 | 0.000128 |
| 13720 | YSK4      | 0.40668604  | -0.933646701 | 0.661338 | -1.411755 | 0.158022 | 0.225757 |
| 13044 | AKNAD1    | 1.341839185 | -0.933727675 | 0.572208 | -1.631799 | 0.102722 | 0.154358 |
| 13075 | ASTL      | 0.427293584 | -0.934079245 | 0.576114 | -1.621345 | 0.104944 | 0.157323 |
| 2014  | CNPY3     | 1592.294801 | -0.93511762  | 0.134716 | -6.941404 | 3.88E-12 | 3.78E-11 |
| 10835 | SRD5A2    | 2.506387899 | -0.935146565 | 0.398304 | -2.34782  | 0.018884 | 0.034161 |
| 5864  | CACNA1H   | 545.8785376 | -0.935200522 | 0.215533 | -4.339011 | 1.43E-05 | 4.78E-05 |
| 9834  | IDO2      | 3.700158164 | -0.93533397  | 0.345372 | -2.708197 | 0.006765 | 0.013484 |
| 3438  | C11orf75  | 481.379366  | -0.93556996  | 0.163585 | -5.719153 | 1.07E-08 | 6.10E-08 |
| 496   | ARHGEF2   | 1494.636927 | -0.935606877 | 0.097102 | -9.635279 | 5.67E-22 | 2.24E-20 |
| 13163 | CYP26C1   | 2.411012413 | -0.935738547 | 0.588107 | -1.591101 | 0.111587 | 0.166164 |
| 5384  | MMP14     | 7115.873479 | -0.935908148 | 0.204505 | -4.576453 | 4.73E-06 | 1.72E-05 |
| 5134  | C1orf213  | 62.31080386 | -0.936094793 | 0.198666 | -4.71191  | 2.45E-06 | 9.37E-06 |
| 3038  | C19orf53  | 1675.353759 | -0.936852542 | 0.155994 | -6.005704 | 1.91E-09 | 1.23E-08 |
| 10062 | GJB2      | 1092.641835 | -0.936889415 | 0.355968 | -2.63195  | 0.00849  | 0.016538 |
| 10466 | BAI2      | 81.2524572  | -0.937350617 | 0.376893 | -2.487048 | 0.012881 | 0.024124 |
| 3771  | MRPL55    | 559.6327196 | -0.937381145 | 0.1706   | -5.494621 | 3.92E-08 | 2.04E-07 |
| 3087  | RASA3     | 846.5545827 | -0.937789789 | 0.157043 | -5.971542 | 2.35E-09 | 1.49E-08 |

|       |          |             |              |          |           |          |          |
|-------|----------|-------------|--------------|----------|-----------|----------|----------|
| 5405  | LTB4R    | 269.1175391 | -0.937846571 | 0.205581 | -4.561924 | 5.07E-06 | 1.84E-05 |
| 1165  | CALR     | 27937.14789 | -0.937850161 | 0.116242 | -8.068057 | 7.14E-16 | 1.20E-14 |
| 2293  | LPXN     | 502.702872  | -0.938043378 | 0.1408   | -6.662236 | 2.70E-11 | 2.31E-10 |
| 1202  | NAGPA    | 359.8179389 | -0.939225818 | 0.117234 | -8.011573 | 1.13E-15 | 1.85E-14 |
| 4006  | GYPC     | 1416.295871 | -0.939320002 | 0.175997 | -5.337147 | 9.44E-08 | 4.62E-07 |
| 2258  | RPS11    | 24445.31102 | -0.939360353 | 0.140416 | -6.689839 | 2.23E-11 | 1.94E-10 |
| 8404  | FHL1     | 6290.877586 | -0.939737247 | 0.289393 | -3.247273 | 0.001165 | 0.002718 |
| 8724  | KLRC3    | 6.556520332 | -0.940115838 | 0.301472 | -3.118417 | 0.001818 | 0.004085 |
| 5783  | CHRNE    | 40.50877146 | -0.940778033 | 0.214772 | -4.380359 | 1.18E-05 | 4.02E-05 |
| 11604 | SNX32    | 5.473458143 | -0.941085835 | 0.452531 | -2.079607 | 0.037562 | 0.063448 |
| 2380  | CSTB     | 3110.87886  | -0.941108524 | 0.143065 | -6.578208 | 4.76E-11 | 3.92E-10 |
| 7432  | CST7     | 288.1273952 | -0.94185807  | 0.258474 | -3.643919 | 0.000269 | 0.000708 |
| 9707  | FAM43B   | 28.90279931 | -0.942102632 | 0.343161 | -2.74537  | 0.006044 | 0.012204 |
| 4044  | RAB40C   | 914.2669914 | -0.942171857 | 0.177457 | -5.309309 | 1.10E-07 | 5.33E-07 |
| 6753  | OLR1     | 397.4777982 | -0.94242625  | 0.240541 | -3.917941 | 8.93E-05 | 0.000259 |
| 5289  | CTSS     | 3613.151246 | -0.942616874 | 0.203651 | -4.628599 | 3.68E-06 | 1.36E-05 |
| 9077  | ABCA9    | 36.76498202 | -0.942715465 | 0.315569 | -2.987355 | 0.002814 | 0.006077 |
| 10509 | ACCN2    | 54.94959479 | -0.943125601 | 0.382013 | -2.46883  | 0.013556 | 0.025283 |
| 3768  | DSE      | 859.3892439 | -0.943157926 | 0.171543 | -5.498081 | 3.84E-08 | 2.00E-07 |
| 7726  | RHPN1    | 346.3546757 | -0.943183315 | 0.267172 | -3.530246 | 0.000415 | 0.001053 |
| 7619  | TEKT3    | 4.065136275 | -0.943213812 | 0.264029 | -3.572383 | 0.000354 | 0.00091  |
| 8037  | PBK      | 82.36913121 | -0.943435073 | 0.277775 | -3.396397 | 0.000683 | 0.001665 |
| 15233 | NBLA0030 | 0.321381967 | -0.94346237  | 1.005676 | -0.938138 | 0.348174 | 0.448011 |
| 4265  | DLG5     | 1244.993571 | -0.944027    | 0.182449 | -5.174186 | 2.29E-07 | 1.05E-06 |
| 7236  | IFI27    | 2265.887021 | -0.944165037 | 0.253093 | -3.730513 | 0.000191 | 0.000518 |
| 9096  | BEGAIN   | 9.088482976 | -0.944609488 | 0.317184 | -2.978113 | 0.0029   | 0.00625  |
| 2144  | CSDA     | 5752.723365 | -0.944671297 | 0.138667 | -6.812527 | 9.59E-12 | 8.77E-11 |
| 3870  | PDLIM2   | 625.9086092 | -0.944941877 | 0.174298 | -5.421428 | 5.91E-08 | 2.99E-07 |
| 12023 | PLA2G12B | 116.728777  | -0.945961448 | 0.483859 | -1.955037 | 0.050579 | 0.082461 |
| 4585  | TNFSF4   | 107.334372  | -0.946045582 | 0.189477 | -4.992924 | 5.95E-07 | 2.54E-06 |
| 14424 | AIPL1    | 0.401554428 | -0.946447008 | 0.794676 | -1.190984 | 0.23366  | 0.317524 |
| 8497  | HLA-DOB  | 104.9045762 | -0.946508802 | 0.295099 | -3.207429 | 0.001339 | 0.003089 |
| 8214  | RPH3A    | 7.280771867 | -0.946908505 | 0.284704 | -3.325943 | 0.000881 | 0.002103 |
| 2615  | POLD2    | 2099.932792 | -0.947055514 | 0.148858 | -6.362157 | 1.99E-10 | 1.49E-09 |
| 5113  | MFRP     | 970.6195829 | -0.947204147 | 0.200605 | -4.721736 | 2.34E-06 | 8.96E-06 |
| 11972 | PRAP1    | 693.795784  | -0.947822028 | 0.481602 | -1.96806  | 0.049061 | 0.080325 |
| 14599 | ADAM18   | 14.75968511 | -0.948989979 | 0.835434 | -1.135924 | 0.255988 | 0.343697 |
| 6548  | GLIPR1   | 1136.396277 | -0.949383162 | 0.236979 | -4.006186 | 6.17E-05 | 0.000185 |
| 8699  | PLSCR2   | 2.190272785 | -0.949493326 | 0.303252 | -3.131032 | 0.001742 | 0.003925 |
| 8049  | IRS2     | 1422.511105 | -0.949537791 | 0.279869 | -3.392789 | 0.000692 | 0.001685 |
| 4663  | NCF2     | 407.5891451 | -0.949541269 | 0.191647 | -4.954624 | 7.25E-07 | 3.05E-06 |
| 9203  | ZNF80    | 7.690564087 | -0.949570467 | 0.323274 | -2.937359 | 0.00331  | 0.00705  |
| 2385  | RPL13AP2 | 25.96334179 | -0.949669693 | 0.14449  | -6.572558 | 4.95E-11 | 4.06E-10 |
| 4864  | MPST     | 1171.062635 | -0.949956839 | 0.195658 | -4.855184 | 1.20E-06 | 4.85E-06 |
| 5924  | GPR183   | 391.4924609 | -0.950152099 | 0.220389 | -4.311249 | 1.62E-05 | 5.37E-05 |
| 6687  | LMOD1    | 550.240201  | -0.950215672 | 0.24076  | -3.946735 | 7.92E-05 | 0.000232 |
| 1736  | CXCL16   | 1721.808966 | -0.950221293 | 0.130963 | -7.25564  | 4.00E-13 | 4.51E-12 |

|       |           |             |              |          |           |          |          |
|-------|-----------|-------------|--------------|----------|-----------|----------|----------|
| 8910  | RFPL2     | 3.231824325 | -0.95099942  | 0.312006 | -3.048016 | 0.002304 | 0.005068 |
| 9491  | DNAH2     | 6.078673071 | -0.9510275   | 0.337083 | -2.821346 | 0.004782 | 0.009875 |
| 4029  | RFXANK    | 990.7395812 | -0.951913405 | 0.178988 | -5.318306 | 1.05E-07 | 5.10E-07 |
| 3552  | FES       | 359.7316878 | -0.951930555 | 0.168977 | -5.633487 | 1.77E-08 | 9.75E-08 |
| 7253  | NPTXR     | 173.0388716 | -0.952357621 | 0.25577  | -3.723492 | 0.000196 | 0.000531 |
| 15636 | MRAP      | 0.579149664 | -0.953062099 | 1.154072 | -0.825825 | 0.408903 | 0.512594 |
| 7714  | TLR7      | 295.2644578 | -0.954228866 | 0.269994 | -3.534256 | 0.000409 | 0.001039 |
| 2822  | ZCWPW1    | 106.6812151 | -0.95425918  | 0.154678 | -6.169346 | 6.86E-10 | 4.76E-09 |
| 13660 | C3orf43   | 0.348447769 | -0.954321159 | 0.66478  | -1.435545 | 0.151132 | 0.216862 |
| 5892  | GEM       | 1058.598867 | -0.954368533 | 0.220663 | -4.325013 | 1.53E-05 | 5.07E-05 |
| 2477  | RPS16     | 13456.37297 | -0.954542337 | 0.147047 | -6.49142  | 8.50E-11 | 6.73E-10 |
| 4634  | TEX14     | 4.625414627 | -0.954637873 | 0.19201  | -4.971801 | 6.63E-07 | 2.81E-06 |
| 4138  | TSHZ3     | 225.8075056 | -0.95528972  | 0.181615 | -5.259975 | 1.44E-07 | 6.82E-07 |
| 8906  | SDK1      | 662.0581693 | -0.955531568 | 0.313305 | -3.049845 | 0.00229  | 0.005039 |
| 3053  | UBTD1     | 260.3256804 | -0.955628235 | 0.159338 | -5.997501 | 2.00E-09 | 1.29E-08 |
| 2869  | MTCP1NB   | 648.3409629 | -0.956292029 | 0.156007 | -6.129806 | 8.80E-10 | 6.01E-09 |
| 10658 | SUMO1P1   | 0.976494234 | -0.956327175 | 0.396849 | -2.409801 | 0.015961 | 0.029354 |
| 3619  | ANAPC11   | 954.4678946 | -0.956459997 | 0.171    | -5.593325 | 2.23E-08 | 1.21E-07 |
| 2310  | FANCI     | 340.0204399 | -0.956513088 | 0.143893 | -6.647385 | 2.98E-11 | 2.53E-10 |
| 10472 | BRSK2     | 10.49856615 | -0.95662795  | 0.385101 | -2.484097 | 0.012988 | 0.02431  |
| 10596 | CD300E    | 7.098241716 | -0.95679826  | 0.392632 | -2.436884 | 0.014814 | 0.027404 |
| 8064  | KRT86     | 18.17357489 | -0.956852885 | 0.282536 | -3.386654 | 0.000708 | 0.00172  |
| 2232  | GAA       | 3869.782024 | -0.957151101 | 0.142467 | -6.7184   | 1.84E-11 | 1.61E-10 |
| 7518  | CLEC12A   | 68.80181999 | -0.957185011 | 0.265268 | -3.608363 | 0.000308 | 0.000803 |
| 8192  | CLDN9     | 10.6396758  | -0.95748715  | 0.28701  | -3.33608  | 0.00085  | 0.002033 |
| 8271  | MYB       | 13.23701895 | -0.957491111 | 0.289789 | -3.304099 | 0.000953 | 0.002258 |
| 6976  | CABP4     | 7.34764881  | -0.958057188 | 0.249838 | -3.834716 | 0.000126 | 0.000353 |
| 12774 | C21orf90  | 1.976487971 | -0.958279436 | 0.559718 | -1.712077 | 0.086883 | 0.133316 |
| 7057  | GPR171    | 48.99494777 | -0.958472832 | 0.252355 | -3.798114 | 0.000146 | 0.000405 |
| 8935  | HIST1H3D  | 12.89834977 | -0.95854539  | 0.315356 | -3.039565 | 0.002369 | 0.005197 |
| 2015  | PSENN     | 1062.156597 | -0.959506898 | 0.138232 | -6.941304 | 3.88E-12 | 3.78E-11 |
| 13320 | KRT12     | 0.799450673 | -0.959882268 | 0.624412 | -1.537259 | 0.12423  | 0.18281  |
| 11311 | NEFL      | 1078.450067 | -0.959946029 | 0.441268 | -2.175425 | 0.029598 | 0.051291 |
| 13978 | LOC729668 | 0.305668157 | -0.960660194 | 0.725137 | -1.324798 | 0.185238 | 0.259755 |
| 3626  | SLC27A3   | 650.0275727 | -0.961014547 | 0.171916 | -5.590012 | 2.27E-08 | 1.23E-07 |
| 2394  | RNF24     | 286.1651765 | -0.961123717 | 0.146422 | -6.564067 | 5.24E-11 | 4.29E-10 |
| 14153 | LOC285548 | 0.612831174 | -0.961150605 | 0.756522 | -1.270487 | 0.203911 | 0.282404 |
| 6297  | FAM72A    | 8.268390709 | -0.962140295 | 0.233029 | -4.128841 | 3.65E-05 | 0.000113 |
| 4560  | IGFBP4    | 24091.5988  | -0.962665192 | 0.192386 | -5.00383  | 5.62E-07 | 2.42E-06 |
| 1532  | LTBR      | 2990.166242 | -0.962751522 | 0.128112 | -7.514899 | 5.70E-14 | 7.29E-13 |
| 4665  | STAT4     | 109.2154979 | -0.963109911 | 0.194402 | -4.954206 | 7.26E-07 | 3.05E-06 |
| 3612  | TSPAN15   | 745.1617807 | -0.963212964 | 0.171963 | -5.601274 | 2.13E-08 | 1.15E-07 |
| 13087 | CXorf1    | 2.715762941 | -0.964361371 | 0.596853 | -1.615744 | 0.10615  | 0.158985 |
| 2407  | C13orf29  | 111.2681411 | -0.96484048  | 0.147272 | -6.55142  | 5.70E-11 | 4.64E-10 |
| 583   | CHPF2     | 1459.259082 | -0.96524427  | 0.103007 | -9.37068  | 7.21E-21 | 2.42E-19 |
| 1842  | SLC35E4   | 100.7562259 | -0.965538204 | 0.135098 | -7.146943 | 8.87E-13 | 9.44E-12 |
| 3357  | C1orf122  | 454.2229825 | -0.965556617 | 0.167218 | -5.774228 | 7.73E-09 | 4.51E-08 |

|       |           |             |              |          |           |          |          |
|-------|-----------|-------------|--------------|----------|-----------|----------|----------|
| 5282  | IKZF1     | 525.9627187 | -0.965563939 | 0.208338 | -4.634614 | 3.58E-06 | 1.33E-05 |
| 6111  | MYBL1     | 210.701104  | -0.966588534 | 0.229306 | -4.215275 | 2.49E-05 | 8.00E-05 |
| 7605  | C6orf59   | 7.672987402 | -0.966974767 | 0.270237 | -3.578243 | 0.000346 | 0.000892 |
| 8866  | CXCL9     | 1543.540066 | -0.967296286 | 0.315687 | -3.064102 | 0.002183 | 0.004826 |
| 3767  | C17orf106 | 378.9210158 | -0.967325362 | 0.175924 | -5.498545 | 3.83E-08 | 1.99E-07 |
| 9300  | HSF4      | 1051.916409 | -0.967562186 | 0.333551 | -2.900793 | 0.003722 | 0.007845 |
| 11678 | KISS1R    | 172.643967  | -0.968002781 | 0.470682 | -2.056598 | 0.039725 | 0.066677 |
| 6562  | LOC647121 | 43.14014574 | -0.968003571 | 0.241934 | -4.001104 | 6.30E-05 | 0.000188 |
| 13953 | KLK5      | 0.598193218 | -0.96824076  | 0.726224 | -1.333254 | 0.182449 | 0.256283 |
| 5444  | PTK7      | 703.0208781 | -0.968417974 | 0.21309  | -4.544643 | 5.50E-06 | 1.98E-05 |
| 2845  | RIPK2     | 546.2810008 | -0.96856072  | 0.157531 | -6.148391 | 7.83E-10 | 5.39E-09 |
| 5752  | MIF       | 9648.914934 | -0.968691924 | 0.220347 | -4.396206 | 1.10E-05 | 3.75E-05 |
| 3772  | DPCD      | 558.1206574 | -0.968724864 | 0.176376 | -5.492394 | 3.97E-08 | 2.06E-07 |
| 3016  | VAMP5     | 1051.165004 | -0.969701558 | 0.16103  | -6.02186  | 1.72E-09 | 1.12E-08 |
| 1297  | RPS24     | 16620.60305 | -0.970822648 | 0.12336  | -7.869838 | 3.55E-15 | 5.37E-14 |
| 7725  | C4A       | 33941.89368 | -0.971092907 | 0.275029 | -3.530873 | 0.000414 | 0.001051 |
| 14313 | OBP2B     | 0.285405707 | -0.971392801 | 0.792069 | -1.226398 | 0.220049 | 0.301354 |
| 781   | TMED9     | 5265.567879 | -0.971663972 | 0.11034  | -8.806067 | 1.30E-18 | 3.25E-17 |
| 10622 | FAM66D    | 22.51559292 | -0.971840663 | 0.400561 | -2.426199 | 0.015258 | 0.028156 |
| 5133  | C19orf57  | 18.53295814 | -0.972018904 | 0.206259 | -4.712605 | 2.45E-06 | 9.34E-06 |
| 13896 | SPATA8    | 1.025429635 | -0.972093511 | 0.720275 | -1.349614 | 0.17714  | 0.249864 |
| 8070  | ICOS      | 31.02585958 | -0.972700844 | 0.287419 | -3.384265 | 0.000714 | 0.001733 |
| 1051  | RPL30     | 12644.80762 | -0.972741758 | 0.118047 | -8.240295 | 1.72E-16 | 3.20E-15 |
| 8110  | FBLN2     | 875.3832839 | -0.972832763 | 0.289078 | -3.365293 | 0.000765 | 0.001848 |
| 12646 | FOXG1     | 1.322048665 | -0.972835527 | 0.55324  | -1.758433 | 0.078674 | 0.121943 |
| 4324  | FADS3     | 669.8677793 | -0.973152498 | 0.189137 | -5.145216 | 2.67E-07 | 1.21E-06 |
| 8602  | CHST13    | 271.7266321 | -0.973159922 | 0.306541 | -3.174644 | 0.0015   | 0.003418 |
| 2184  | ANKRD13I  | 400.6449012 | -0.973448432 | 0.143702 | -6.774061 | 1.25E-11 | 1.12E-10 |
| 8587  | SHH       | 26.77051269 | -0.973451412 | 0.306299 | -3.178113 | 0.001482 | 0.003384 |
| 17233 | NKX2-4    | 0.254166591 | -0.973982513 | 2.558648 | -0.380663 | 0.703453 | 0.800115 |
| 17308 | CSAG2     | 0.171906959 | -0.973982939 | 2.66542  | -0.365414 | 0.714802 | 0.809501 |
| 16897 | DPPA2     | 0.184961623 | -0.9739835   | 2.090951 | -0.465809 | 0.641352 | 0.743943 |
| 16905 | S100A7A   | 0.170313924 | -0.973983617 | 2.099167 | -0.463986 | 0.642658 | 0.745149 |
| 16695 | PPY       | 0.193000706 | -0.973983742 | 1.873101 | -0.519985 | 0.603074 | 0.708048 |
| 15907 | SMYD1     | 0.174493121 | -0.97398429  | 1.314601 | -0.740897 | 0.458756 | 0.565309 |
| 7423  | TP63      | 16.37819289 | -0.974195865 | 0.267079 | -3.647595 | 0.000265 | 0.000699 |
| 4742  | RPL39     | 637.0572535 | -0.975097886 | 0.198476 | -4.912938 | 8.97E-07 | 3.71E-06 |
| 4410  | RBP1      | 239.943694  | -0.975581099 | 0.191493 | -5.094603 | 3.49E-07 | 1.55E-06 |
| 9262  | IL1A      | 2.703384095 | -0.976215512 | 0.335257 | -2.91184  | 0.003593 | 0.007603 |
| 10914 | OGN       | 50.31514857 | -0.977047766 | 0.422091 | -2.31478  | 0.020625 | 0.037041 |
| 7613  | ADAM11    | 17.61907777 | -0.977078418 | 0.273215 | -3.576231 | 0.000349 | 0.000897 |
| 4407  | LRRC45    | 307.0885081 | -0.97725502  | 0.191714 | -5.097453 | 3.44E-07 | 1.53E-06 |
| 10869 | TSPO2     | 1.948236288 | -0.977712844 | 0.419003 | -2.333429 | 0.019626 | 0.035393 |
| 2618  | NSUN5     | 463.6709085 | -0.978205731 | 0.153852 | -6.358094 | 2.04E-10 | 1.53E-09 |
| 5193  | GLI3      | 235.7535141 | -0.978599515 | 0.209123 | -4.679531 | 2.88E-06 | 1.09E-05 |
| 8533  | APOE      | 15668.56091 | -0.978623707 | 0.306389 | -3.194061 | 0.001403 | 0.003223 |
| 11625 | LRFN5     | 15.66237561 | -0.979113567 | 0.47299  | -2.070051 | 0.038448 | 0.064827 |



|       |           |             |              |          |           |          |          |
|-------|-----------|-------------|--------------|----------|-----------|----------|----------|
| 2336  | RPL27     | 8579.211696 | -0.979322812 | 0.147956 | -6.619032 | 3.62E-11 | 3.03E-10 |
| 8292  | KCNT2     | 79.02206221 | -0.979689168 | 0.297102 | -3.297488 | 0.000976 | 0.002306 |
| 1737  | AMPD2     | 1126.395986 | -0.979762825 | 0.135057 | -7.254426 | 4.03E-13 | 4.55E-12 |
| 9584  | CCL17     | 8.011329429 | -0.980052141 | 0.351713 | -2.786508 | 0.005328 | 0.010897 |
| 12647 | UPK1B     | 88.40984307 | -0.980145172 | 0.557432 | -1.758322 | 0.078693 | 0.121962 |
| 12741 | AFP       | 7.399822986 | -0.980417664 | 0.569935 | -1.720226 | 0.085391 | 0.131368 |
| 443   | STAT2     | 2268.374361 | -0.980805307 | 0.099694 | -9.838132 | 7.71E-23 | 3.42E-21 |
| 4947  | DNMT3B    | 90.41057728 | -0.98147467  | 0.20442  | -4.80127  | 1.58E-06 | 6.25E-06 |
| 6259  | HES6      | 62.12501007 | -0.981578399 | 0.236452 | -4.151273 | 3.31E-05 | 0.000104 |
| 7441  | MN1       | 222.6368473 | -0.981757878 | 0.269719 | -3.639933 | 0.000273 | 0.000718 |
| 7484  | IL34      | 212.34033   | -0.981802593 | 0.271113 | -3.621383 | 0.000293 | 0.000767 |
| 7821  | MDS2      | 2.205046434 | -0.981858586 | 0.281007 | -3.494072 | 0.000476 | 0.001192 |
| 2867  | TKT       | 3380.850164 | -0.981944372 | 0.160166 | -6.130806 | 8.74E-10 | 5.98E-09 |
| 14708 | MS4A3     | 0.586123824 | -0.982692472 | 0.896921 | -1.095629 | 0.273241 | 0.364142 |
| 8024  | GPAT2     | 54.37374037 | -0.982718881 | 0.288901 | -3.401578 | 0.00067  | 0.001637 |
| 4282  | MXRA7     | 6484.096036 | -0.983673018 | 0.190406 | -5.166194 | 2.39E-07 | 1.09E-06 |
| 1114  | SNRPA     | 967.502144  | -0.983706374 | 0.120859 | -8.139313 | 3.98E-16 | 6.99E-15 |
| 7419  | SPATC1    | 4.955302594 | -0.983744094 | 0.269599 | -3.64891  | 0.000263 | 0.000696 |
| 2271  | AKNA      | 894.5606551 | -0.983856253 | 0.14738  | -6.675649 | 2.46E-11 | 2.12E-10 |
| 2790  | CHEK2     | 145.3463307 | -0.983993456 | 0.158718 | -6.199627 | 5.66E-10 | 3.98E-09 |
| 12931 | SDR16C5   | 1.221417593 | -0.984644565 | 0.591506 | -1.664639 | 0.095985 | 0.145506 |
| 10215 | LOC284233 | 8.247348722 | -0.984916289 | 0.382222 | -2.576817 | 0.009971 | 0.019134 |
| 1355  | GTF3A     | 2525.573647 | -0.984919727 | 0.126487 | -7.786709 | 6.88E-15 | 9.95E-14 |
| 879   | C17orf62  | 1385.739743 | -0.985042926 | 0.11486  | -8.576053 | 9.82E-18 | 2.19E-16 |
| 6591  | SECTM1    | 484.2354854 | -0.985221051 | 0.247122 | -3.986782 | 6.70E-05 | 0.000199 |
| 10303 | CA9       | 5264.024522 | -0.986045218 | 0.387536 | -2.544398 | 0.010947 | 0.020825 |
| 9349  | HIF3A     | 150.0227757 | -0.98693854  | 0.342821 | -2.878874 | 0.003991 | 0.008365 |
| 9246  | MGC42105  | 42.38534526 | -0.987959562 | 0.338327 | -2.920132 | 0.003499 | 0.007417 |
| 2224  | LMCD1     | 571.4632075 | -0.988511127 | 0.146892 | -6.729496 | 1.70E-11 | 1.50E-10 |
| 7678  | PTPLA     | 38.14189363 | -0.988747631 | 0.278689 | -3.54785  | 0.000388 | 0.000992 |
| 9991  | TMEM100   | 226.4767182 | -0.989453597 | 0.37266  | -2.65511  | 0.007928 | 0.015555 |
| 8231  | NELL2     | 63.35447451 | -0.989509303 | 0.298065 | -3.319772 | 0.000901 | 0.002145 |
| 9944  | FAM182A   | 3.639542224 | -0.98995248  | 0.37038  | -2.672803 | 0.007522 | 0.014827 |
| 3059  | RPL8      | 30065.89167 | -0.989977635 | 0.165193 | -5.992846 | 2.06E-09 | 1.32E-08 |
| 7760  | BTLA      | 22.36967894 | -0.990070812 | 0.281708 | -3.514531 | 0.000441 | 0.001113 |
| 5546  | SMARCD3   | 371.7656552 | -0.990451836 | 0.220105 | -4.499907 | 6.80E-06 | 2.40E-05 |
| 9112  | MRS2P2    | 4.163254597 | -0.990635783 | 0.333079 | -2.974179 | 0.002938 | 0.006319 |
| 8823  | SYNPO2L   | 2.863245867 | -0.991021314 | 0.321597 | -3.081566 | 0.002059 | 0.004575 |
| 5210  | SCAND1    | 880.7332908 | -0.991817319 | 0.212213 | -4.67368  | 2.96E-06 | 1.11E-05 |
| 1468  | ZYX       | 3820.945542 | -0.992074022 | 0.130259 | -7.616187 | 2.61E-14 | 3.49E-13 |
| 4312  | TRAF3IP3  | 156.5179066 | -0.99311846  | 0.192831 | -5.150193 | 2.60E-07 | 1.18E-06 |
| 8444  | OR2W3     | 1.967127614 | -0.993514705 | 0.307585 | -3.230044 | 0.001238 | 0.002873 |
| 647   | PPM1M     | 504.5480016 | -0.993773155 | 0.108345 | -9.172323 | 4.63E-20 | 1.41E-18 |
| 3890  | HLA-DRA   | 28823.12947 | -0.994163329 | 0.183826 | -5.408183 | 6.37E-08 | 3.21E-07 |
| 3662  | TLR2      | 706.3423528 | -0.994671545 | 0.178863 | -5.561082 | 2.68E-08 | 1.44E-07 |
| 13017 | C11orf85  | 2.843721661 | -0.995111803 | 0.607305 | -1.63857  | 0.101303 | 0.152542 |
| 3569  | RND3      | 1079.332345 | -0.995726602 | 0.177045 | -5.624147 | 1.86E-08 | 1.02E-07 |

|       |           |             |              |          |           |          |          |
|-------|-----------|-------------|--------------|----------|-----------|----------|----------|
| 6653  | KIF2A     | 890.4988161 | -0.995820713 | 0.251408 | -3.960977 | 7.46E-05 | 0.00022  |
| 3262  | C9orf100  | 131.2329289 | -0.996214922 | 0.170575 | -5.840335 | 5.21E-09 | 3.13E-08 |
| 2736  | B3GAT3    | 843.033756  | -0.996380335 | 0.159413 | -6.250319 | 4.10E-10 | 2.93E-09 |
| 1414  | PLEKHA9   | 83.37009362 | -0.996382335 | 0.129681 | -7.683316 | 1.55E-14 | 2.15E-13 |
| 10704 | C10orf50  | 1.034165355 | -0.996413719 | 0.415871 | -2.395967 | 0.016577 | 0.030355 |
| 2972  | C7orf13   | 174.8171392 | -0.99655906  | 0.164568 | -6.05561  | 1.40E-09 | 9.23E-09 |
| 7424  | PDE11A    | 159.2895455 | -0.996793979 | 0.273326 | -3.646901 | 0.000265 | 0.000701 |
| 2919  | TP53TG1   | 421.2516347 | -0.996936192 | 0.163507 | -6.097213 | 1.08E-09 | 7.25E-09 |
| 5120  | OSMR      | 2880.914534 | -0.997226022 | 0.211385 | -4.717578 | 2.39E-06 | 9.14E-06 |
| 5321  | RPL13AP6  | 7.53217659  | -0.998296653 | 0.216455 | -4.612023 | 3.99E-06 | 1.47E-05 |
| 1602  | FAM110A   | 221.5001105 | -0.998491576 | 0.134597 | -7.418386 | 1.19E-13 | 1.45E-12 |
| 5951  | C1orf21   | 691.8248254 | -0.998656086 | 0.232787 | -4.289999 | 1.79E-05 | 5.89E-05 |
| 3700  | C11orf82  | 33.28489333 | -0.999145537 | 0.18049  | -5.535748 | 3.10E-08 | 1.64E-07 |
| 3951  | CBX2      | 57.84304634 | -0.999742938 | 0.18602  | -5.374384 | 7.68E-08 | 3.81E-07 |
| 953   | MBOAT7    | 1214.048533 | -0.999792423 | 0.118448 | -8.440768 | 3.15E-17 | 6.48E-16 |
| 9331  | RPPH1     | 69.51174344 | -1.000196973 | 0.34643  | -2.887154 | 0.003887 | 0.008166 |
| 2316  | RPS8      | 20963.87543 | -1.000253374 | 0.150614 | -6.641178 | 3.11E-11 | 2.63E-10 |
| 1607  | POLD1     | 341.9924334 | -1.000282364 | 0.134888 | -7.415651 | 1.21E-13 | 1.48E-12 |
| 7728  | E2F8      | 49.23118971 | -1.000529024 | 0.283492 | -3.529301 | 0.000417 | 0.001057 |
| 8193  | CXCR2     | 36.31929008 | -1.000596932 | 0.299932 | -3.336084 | 0.00085  | 0.002033 |
| 6089  | APOL4     | 190.2618182 | -1.000754048 | 0.236814 | -4.225915 | 2.38E-05 | 7.66E-05 |
| 13710 | CEACAM5   | 0.81871246  | -1.001386629 | 0.707762 | -1.414864 | 0.157108 | 0.224616 |
| 7742  | CTLA4     | 35.16009089 | -1.001458365 | 0.284321 | -3.522281 | 0.000428 | 0.001083 |
| 1844  | CD151     | 9534.726154 | -1.001515289 | 0.140157 | -7.145654 | 8.96E-13 | 9.52E-12 |
| 5950  | TLCD1     | 88.98254421 | -1.001582193 | 0.233443 | -4.290488 | 1.78E-05 | 5.87E-05 |
| 11810 | HES7      | 2.334822257 | -1.001739891 | 0.496433 | -2.017876 | 0.043604 | 0.07237  |
| 9452  | CCR9      | 2.972741843 | -1.001998964 | 0.353206 | -2.83687  | 0.004556 | 0.009448 |
| 6539  | P2RY2     | 31.00621104 | -1.002445867 | 0.250058 | -4.008851 | 6.10E-05 | 0.000183 |
| 12635 | VSTM1     | 1.466190748 | -1.002489571 | 0.568638 | -1.762965 | 0.077906 | 0.120858 |
| 7159  | LOC388588 | 54.21167696 | -1.002494415 | 0.266584 | -3.760519 | 0.00017  | 0.000464 |
| 3437  | LCP2      | 854.3610404 | -1.002794514 | 0.175338 | -5.719211 | 1.07E-08 | 6.10E-08 |
| 704   | CKLF      | 349.963948  | -1.003113776 | 0.111431 | -9.00211  | 2.21E-19 | 6.16E-18 |
| 2065  | NR1H3     | 838.1523847 | -1.003304382 | 0.145777 | -6.882446 | 5.88E-12 | 5.58E-11 |
| 1766  | BUD31     | 1457.454895 | -1.003440032 | 0.138867 | -7.225904 | 4.98E-13 | 5.52E-12 |
| 8835  | C8orf84   | 753.7854104 | -1.003862778 | 0.326364 | -3.075897 | 0.002099 | 0.004656 |
| 5208  | CHSY3     | 133.9958068 | -1.004045536 | 0.214803 | -4.674252 | 2.95E-06 | 1.11E-05 |
| 2816  | CDR2L     | 406.1909165 | -1.004107349 | 0.162624 | -6.174416 | 6.64E-10 | 4.62E-09 |
| 5631  | OAZ3      | 20.23159351 | -1.004350567 | 0.225417 | -4.455514 | 8.37E-06 | 2.91E-05 |
| 10452 | HSD17B3   | 17.44388191 | -1.004431544 | 0.403048 | -2.492087 | 0.0127   | 0.023816 |
| 6476  | MND1      | 20.97023894 | -1.004460119 | 0.248774 | -4.037646 | 5.40E-05 | 0.000163 |
| 1304  | LPPR2     | 517.5716674 | -1.004639602 | 0.127881 | -7.856037 | 3.96E-15 | 5.96E-14 |
| 8476  | RAB3C     | 6.084886023 | -1.004748252 | 0.312285 | -3.217408 | 0.001294 | 0.002991 |
| 4387  | AURKA     | 189.1303901 | -1.004816096 | 0.196568 | -5.111789 | 3.19E-07 | 1.43E-06 |
| 3112  | ZNF581    | 448.705829  | -1.005635821 | 0.168905 | -5.95384  | 2.62E-09 | 1.65E-08 |
| 1697  | RPL31     | 13720.40767 | -1.006124505 | 0.137912 | -7.295435 | 2.98E-13 | 3.44E-12 |
| 1816  | TSTA3     | 891.1381239 | -1.00767503  | 0.140482 | -7.172996 | 7.34E-13 | 7.92E-12 |
| 3379  | MAP3K8    | 205.794585  | -1.007729738 | 0.174967 | -5.759538 | 8.43E-09 | 4.89E-08 |

|       |           |             |              |          |           |          |          |
|-------|-----------|-------------|--------------|----------|-----------|----------|----------|
| 6602  | CLEC10A   | 89.82799402 | -1.007851199 | 0.253012 | -3.983411 | 6.79E-05 | 0.000202 |
| 10122 | LOC400804 | 1.303879752 | -1.007920448 | 0.386406 | -2.608448 | 0.009095 | 0.017613 |
| 7637  | TNFSF9    | 212.3885422 | -1.008052385 | 0.282684 | -3.566009 | 0.000362 | 0.00093  |
| 1477  | TARBP2    | 385.1367164 | -1.008795349 | 0.132728 | -7.600448 | 2.95E-14 | 3.92E-13 |
| 5675  | DPM3      | 340.4488935 | -1.008883065 | 0.227501 | -4.434622 | 9.22E-06 | 3.19E-05 |
| 10957 | KCNK4     | 2.196569011 | -1.008993134 | 0.438449 | -2.301276 | 0.021376 | 0.038242 |
| 3756  | C21orf58  | 39.48551206 | -1.009261244 | 0.183391 | -5.503336 | 3.73E-08 | 1.94E-07 |
| 13322 | GJD4      | 0.442083309 | -1.009338646 | 0.657238 | -1.535728 | 0.124605 | 0.183335 |
| 520   | MYO9B     | 1805.814604 | -1.009654435 | 0.105833 | -9.540103 | 1.43E-21 | 5.38E-20 |
| 9053  | SCTR      | 32.17378816 | -1.009921795 | 0.337139 | -2.995563 | 0.002739 | 0.005931 |
| 8547  | DDX11L2   | 16.96672013 | -1.010208555 | 0.316568 | -3.191122 | 0.001417 | 0.00325  |
| 1349  | RPL27A    | 13457.77257 | -1.010845013 | 0.129587 | -7.80052  | 6.17E-15 | 8.96E-14 |
| 212   | AVEN      | 181.5817564 | -1.011267935 | 0.091232 | -11.08461 | 1.49E-28 | 1.38E-26 |
| 14145 | C6orf218  | 0.302535605 | -1.011316834 | 0.794439 | -1.272994 | 0.20302  | 0.281329 |
| 4212  | KIF21B    | 161.4037145 | -1.011655822 | 0.194446 | -5.202757 | 1.96E-07 | 9.14E-07 |
| 3806  | CACNB3    | 320.6825263 | -1.011764341 | 0.184966 | -5.47001  | 4.50E-08 | 2.32E-07 |
| 9531  | HBB       | 2770.099066 | -1.012330484 | 0.360764 | -2.806075 | 0.005015 | 0.010313 |
| 7840  | LPHN3     | 97.32092888 | -1.01285416  | 0.291137 | -3.478964 | 0.000503 | 0.001258 |
| 2109  | RPL32     | 12429.4544  | -1.0129136   | 0.148091 | -6.839783 | 7.93E-12 | 7.37E-11 |
| 10617 | PRPH      | 23.76925154 | -1.01304828  | 0.416957 | -2.429626 | 0.015114 | 0.027904 |
| 4632  | LYPD5     | 40.30337215 | -1.013087307 | 0.203695 | -4.973553 | 6.57E-07 | 2.78E-06 |
| 5933  | PRR16     | 69.44621701 | -1.013914149 | 0.235677 | -4.302141 | 1.69E-05 | 5.59E-05 |
| 5773  | NXN       | 449.8751084 | -1.014036721 | 0.231308 | -4.383923 | 1.17E-05 | 3.96E-05 |
| 8597  | HTR1B     | 3.559415576 | -1.014327405 | 0.319394 | -3.175785 | 0.001494 | 0.003407 |
| 3537  | MGC12982  | 82.99398607 | -1.014357107 | 0.179747 | -5.643235 | 1.67E-08 | 9.25E-08 |
| 3811  | TMC6      | 513.5488331 | -1.014440545 | 0.185566 | -5.46675  | 4.58E-08 | 2.36E-07 |
| 5583  | KIRREL    | 524.5428055 | -1.014456113 | 0.226377 | -4.481266 | 7.42E-06 | 2.61E-05 |
| 7696  | FASLG     | 49.83735286 | -1.014820258 | 0.28654  | -3.541632 | 0.000398 | 0.001013 |
| 7835  | ODF3L2    | 4.221026854 | -1.01533965  | 0.291518 | -3.482938 | 0.000496 | 0.001241 |
| 2102  | RPL18A    | 1960.41427  | -1.01551033  | 0.148299 | -6.847732 | 7.50E-12 | 7.00E-11 |
| 8772  | ZMYND10   | 58.57074859 | -1.015550303 | 0.328105 | -3.095199 | 0.001967 | 0.004395 |
| 13686 | CDH10     | 0.865550593 | -1.015632733 | 0.713322 | -1.423807 | 0.154502 | 0.221277 |
| 6879  | OTOA      | 30.05961464 | -1.016196036 | 0.262468 | -3.871688 | 0.000108 | 0.000308 |
| 5607  | FBXL8     | 120.9371424 | -1.016696042 | 0.227563 | -4.467749 | 7.90E-06 | 2.76E-05 |
| 1616  | ORAI2     | 1158.671793 | -1.017423777 | 0.137371 | -7.406407 | 1.30E-13 | 1.57E-12 |
| 4810  | CPT1C     | 68.77412452 | -1.017724529 | 0.208388 | -4.883792 | 1.04E-06 | 4.24E-06 |
| 7658  | EFCAB4A   | 389.558099  | -1.017905103 | 0.286218 | -3.556402 | 0.000376 | 0.000962 |
| 3685  | LOC339524 | 43.6497953  | -1.017997373 | 0.183525 | -5.546911 | 2.91E-08 | 1.55E-07 |
| 4382  | RASGRP4   | 62.31543594 | -1.018269116 | 0.199123 | -5.113782 | 3.16E-07 | 1.41E-06 |
| 13838 | RFX4      | 0.344545153 | -1.018994311 | 0.742764 | -1.371894 | 0.170096 | 0.240935 |
| 2123  | SNHG6     | 1005.602326 | -1.019409443 | 0.149338 | -6.826208 | 8.72E-12 | 8.05E-11 |
| 3470  | OPN3      | 716.0729145 | -1.019708664 | 0.179056 | -5.694916 | 1.23E-08 | 6.97E-08 |
| 6442  | ZNF469    | 139.3159031 | -1.020006964 | 0.251633 | -4.053542 | 5.04E-05 | 0.000154 |
| 1570  | TUBA1C    | 4687.03873  | -1.020207333 | 0.1366   | -7.468563 | 8.11E-14 | 1.01E-12 |
| 6656  | IIST2H2AA | 503.3570149 | -1.020384446 | 0.257665 | -3.960117 | 7.49E-05 | 0.000221 |
| 7142  | PCDHGC4   | 9.97392677  | -1.020566213 | 0.270963 | -3.766436 | 0.000166 | 0.000454 |
| 10700 | CRNA0015  | 4.238551934 | -1.021352853 | 0.425989 | -2.397605 | 0.016503 | 0.030231 |

|       |           |             |              |          |           |          |          |
|-------|-----------|-------------|--------------|----------|-----------|----------|----------|
| 8041  | C9orf139  | 7.181283099 | -1.021438294 | 0.300787 | -3.395883 | 0.000684 | 0.001668 |
| 8509  | WNT2B     | 42.05893138 | -1.022388345 | 0.319303 | -3.201933 | 0.001365 | 0.003145 |
| 3060  | TGFB1I1   | 624.203315  | -1.022526057 | 0.170651 | -5.991901 | 2.07E-09 | 1.33E-08 |
| 2013  | C17orf49  | 861.9678501 | -1.022535011 | 0.147293 | -6.942168 | 3.86E-12 | 3.76E-11 |
| 10289 | SYNC      | 238.5793255 | -1.02309211  | 0.401209 | -2.550024 | 0.010772 | 0.020519 |
| 8882  | TNFRSF9   | 56.37152107 | -1.023389483 | 0.334567 | -3.058845 | 0.002222 | 0.004903 |
| 13902 | MORC1     | 0.36295556  | -1.023457064 | 0.759191 | -1.348089 | 0.17763  | 0.250429 |
| 5356  | GRAP2     | 45.50599417 | -1.023819007 | 0.223006 | -4.590994 | 4.41E-06 | 1.61E-05 |
| 3675  | TIMM16    | 179.2686728 | -1.024271435 | 0.184436 | -5.553523 | 2.80E-08 | 1.49E-07 |
| 2261  | CLTB      | 1262.168872 | -1.024517549 | 0.153197 | -6.687563 | 2.27E-11 | 1.97E-10 |
| 5917  | DAPP1     | 91.01185749 | -1.024561484 | 0.237518 | -4.313618 | 1.61E-05 | 5.32E-05 |
| 4691  | OC1001342 | 9.095909284 | -1.024678355 | 0.207704 | -4.933363 | 8.08E-07 | 3.38E-06 |
| 4971  | THBD      | 1212.68331  | -1.025046487 | 0.21405  | -4.788823 | 1.68E-06 | 6.62E-06 |
| 5196  | GDPD5     | 244.5177202 | -1.025490368 | 0.21917  | -4.678974 | 2.88E-06 | 1.09E-05 |
| 4337  | VSIG10L   | 71.02576687 | -1.025660249 | 0.19963  | -5.137813 | 2.78E-07 | 1.26E-06 |
| 4178  | MEX3A     | 115.5540094 | -1.025804085 | 0.196208 | -5.228153 | 1.71E-07 | 8.03E-07 |
| 3804  | IDUA      | 240.1298071 | -1.025936957 | 0.187538 | -5.470565 | 4.49E-08 | 2.31E-07 |
| 3944  | PTRF      | 9046.62919  | -1.02595803  | 0.190775 | -5.377834 | 7.54E-08 | 3.75E-07 |
| 9061  | C4orf6    | 40.07805424 | -1.025999245 | 0.342664 | -2.994183 | 0.002752 | 0.005953 |
| 5761  | CABYR     | 35.37873306 | -1.026247498 | 0.233683 | -4.391622 | 1.13E-05 | 3.83E-05 |
| 1285  | C20orf27  | 551.1586009 | -1.026467292 | 0.130263 | -7.879954 | 3.28E-15 | 5.00E-14 |
| 2815  | GBGT1     | 198.8926054 | -1.026794526 | 0.166294 | -6.17458  | 6.63E-10 | 4.62E-09 |
| 7240  | C9orf140  | 99.51117138 | -1.027715177 | 0.275612 | -3.728852 | 0.000192 | 0.000521 |
| 3350  | SLMO1     | 36.07539689 | -1.028118187 | 0.177853 | -5.780707 | 7.44E-09 | 4.35E-08 |
| 487   | PFN1      | 10879.4489  | -1.028643187 | 0.106385 | -9.669063 | 4.08E-22 | 1.64E-20 |
| 8684  | C2orf58   | 17.02961525 | -1.028648946 | 0.327863 | -3.137431 | 0.001704 | 0.003847 |
| 12735 | CRNA0018  | 10.05615866 | -1.028649574 | 0.597355 | -1.722007 | 0.085068 | 0.130932 |
| 8245  | OC1001308 | 114.1937194 | -1.028818309 | 0.310426 | -3.314219 | 0.000919 | 0.002185 |
| 4975  | GNAZ      | 150.8797282 | -1.028890444 | 0.214985 | -4.785871 | 1.70E-06 | 6.71E-06 |
| 2386  | RPL36     | 7647.58728  | -1.028981364 | 0.156586 | -6.571338 | 4.99E-11 | 4.10E-10 |
| 5461  | MGP       | 6068.796754 | -1.029039799 | 0.226791 | -4.537392 | 5.70E-06 | 2.04E-05 |
| 2835  | ARHGAP15  | 179.0305094 | -1.029329999 | 0.167168 | -6.157453 | 7.39E-10 | 5.11E-09 |
| 8109  | PNMA5     | 1.843980983 | -1.029486289 | 0.305705 | -3.367583 | 0.000758 | 0.001833 |
| 15256 | MYH16     | 0.279724193 | -1.029554057 | 1.105061 | -0.931672 | 0.351506 | 0.451617 |
| 5883  | ARHGAP11  | 11.05187336 | -1.029760392 | 0.23775  | -4.331267 | 1.48E-05 | 4.94E-05 |
| 2359  | STIL      | 102.6121532 | -1.030328408 | 0.156103 | -6.600321 | 4.10E-11 | 3.41E-10 |
| 11070 | C15orf53  | 0.821454134 | -1.030420927 | 0.454692 | -2.266194 | 0.023439 | 0.041503 |
| 10851 | BAI1      | 52.02107894 | -1.030693048 | 0.440669 | -2.338926 | 0.019339 | 0.034934 |
| 3173  | EFEMP2    | 2321.694755 | -1.030892124 | 0.174658 | -5.902354 | 3.58E-09 | 2.21E-08 |
| 15369 | FAM75A3   | 0.243759316 | -1.031420644 | 1.146746 | -0.899433 | 0.368422 | 0.469871 |
| 6397  | LILRA5    | 73.58198231 | -1.031682323 | 0.25307  | -4.076663 | 4.57E-05 | 0.00014  |
| 16764 | HCRT      | 0.198950828 | -1.031691086 | 2.064694 | -0.499682 | 0.617299 | 0.721765 |
| 16560 | KRT3      | 0.195785432 | -1.031691364 | 1.854341 | -0.556365 | 0.577961 | 0.684095 |
| 16384 | OR4N2     | 0.201761599 | -1.031691456 | 1.708111 | -0.603996 | 0.545847 | 0.653024 |
| 16389 | GGNBP1    | 0.238940418 | -1.031756224 | 1.710981 | -0.60302  | 0.546495 | 0.65356  |
| 2598  | RPSA      | 4741.595063 | -1.032054138 | 0.161708 | -6.382219 | 1.75E-10 | 1.32E-09 |
| 2814  | APOBEC3I  | 158.6370218 | -1.0322367   | 0.167175 | -6.174579 | 6.63E-10 | 4.62E-09 |

|       |           |             |              |          |           |          |          |
|-------|-----------|-------------|--------------|----------|-----------|----------|----------|
| 13845 | OR2H2     | 0.275036357 | -1.032503336 | 0.75404  | -1.369295 | 0.170907 | 0.241961 |
| 7436  | GJC2      | 59.55021747 | -1.032738256 | 0.283583 | -3.641745 | 0.000271 | 0.000714 |
| 5781  | TNFSF8    | 76.94810747 | -1.033452791 | 0.235858 | -4.381669 | 1.18E-05 | 3.99E-05 |
| 7555  | PDZD4     | 70.17913986 | -1.033601497 | 0.287656 | -3.593189 | 0.000327 | 0.000847 |
| 8051  | DOK5      | 104.3898766 | -1.033737784 | 0.304787 | -3.391678 | 0.000695 | 0.001691 |
| 11572 | TEKT5     | 0.750260254 | -1.034099982 | 0.494338 | -2.091889 | 0.036448 | 0.061737 |
| 7438  | CRTAM     | 57.31036    | -1.034127138 | 0.28401  | -3.641164 | 0.000271 | 0.000715 |
| 7928  | C7orf51   | 7.476398142 | -1.034226779 | 0.300841 | -3.437785 | 0.000586 | 0.00145  |
| 5168  | C16orf93  | 44.93642226 | -1.034750077 | 0.220599 | -4.690637 | 2.72E-06 | 1.03E-05 |
| 5982  | SLC39A4   | 312.3541518 | -1.034847569 | 0.241992 | -4.276367 | 1.90E-05 | 6.22E-05 |
| 5630  | CD40LG    | 34.76737944 | -1.034963461 | 0.232286 | -4.455555 | 8.37E-06 | 2.91E-05 |
| 1604  | DRAP1     | 1241.079997 | -1.035017712 | 0.139536 | -7.417561 | 1.19E-13 | 1.46E-12 |
| 7936  | IGF2      | 536.4011288 | -1.035875479 | 0.301728 | -3.433141 | 0.000597 | 0.001474 |
| 7221  | FBLN5     | 1129.319911 | -1.036850177 | 0.277439 | -3.737225 | 0.000186 | 0.000505 |
| 243   | RFC2      | 631.144692  | -1.037238926 | 0.094981 | -10.92053 | 9.20E-28 | 7.42E-26 |
| 2221  | C11orf48  | 550.2075823 | -1.037295683 | 0.154095 | -6.731534 | 1.68E-11 | 1.48E-10 |
| 3401  | LRRC41    | 3187.785222 | -1.037677554 | 0.180522 | -5.748216 | 9.02E-09 | 5.20E-08 |
| 1269  | CDK5      | 369.4904991 | -1.037824417 | 0.131337 | -7.901998 | 2.74E-15 | 4.24E-14 |
| 1195  | MOSPD3    | 358.4494952 | -1.038167512 | 0.12945  | -8.01981  | 1.06E-15 | 1.74E-14 |
| 12862 | UGT1A5    | 2.606429319 | -1.038492788 | 0.614745 | -1.689305 | 0.091161 | 0.138924 |
| 6497  | LRRC46    | 25.74356034 | -1.039600993 | 0.257967 | -4.029977 | 5.58E-05 | 0.000168 |
| 4773  | CHST3     | 1054.827613 | -1.041404844 | 0.212663 | -4.89698  | 9.73E-07 | 4.00E-06 |
| 5556  | IER5L     | 466.8365553 | -1.041672065 | 0.231745 | -4.49491  | 6.96E-06 | 2.46E-05 |
| 4849  | KIF11     | 231.932654  | -1.041849876 | 0.214076 | -4.866735 | 1.13E-06 | 4.59E-06 |
| 15868 | SLCO1B3   | 0.341768138 | -1.042087191 | 1.383001 | -0.753497 | 0.451151 | 0.557286 |
| 3004  | MAD2L2    | 418.6735029 | -1.042111742 | 0.172786 | -6.031224 | 1.63E-09 | 1.06E-08 |
| 991   | RHOC      | 6241.49476  | -1.042283596 | 0.124692 | -8.358853 | 6.33E-17 | 1.25E-15 |
| 11818 | FAM83C    | 1.122316876 | -1.042490762 | 0.517345 | -2.01508  | 0.043896 | 0.072801 |
| 3122  | ATF5      | 1286.26817  | -1.042499372 | 0.175298 | -5.947029 | 2.73E-09 | 1.71E-08 |
| 11882 | LOC145474 | 0.683510524 | -1.042667594 | 0.522717 | -1.994708 | 0.046075 | 0.076007 |
| 7660  | SH2D5     | 44.27292637 | -1.043508878 | 0.293595 | -3.554244 | 0.000379 | 0.00097  |
| 10442 | SLC5A5    | 1.736292607 | -1.043568803 | 0.417922 | -2.49704  | 0.012523 | 0.023508 |
| 3041  | EVL       | 1814.757468 | -1.043869148 | 0.173843 | -6.004661 | 1.92E-09 | 1.24E-08 |
| 3913  | TTC39C    | 214.6192792 | -1.044383573 | 0.193583 | -5.39501  | 6.85E-08 | 3.43E-07 |
| 1308  | SH3GL1    | 2077.154343 | -1.044431185 | 0.133037 | -7.850654 | 4.14E-15 | 6.20E-14 |
| 1229  | DDX41     | 2360.704314 | -1.04486336  | 0.13102  | -7.974834 | 1.53E-15 | 2.43E-14 |
| 4353  | ELL2      | 2202.893238 | -1.04526715  | 0.203782 | -5.12935  | 2.91E-07 | 1.31E-06 |
| 12027 | FABP5L3   | 0.472583226 | -1.045606484 | 0.535122 | -1.953959 | 0.050706 | 0.082638 |
| 3784  | THY1      | 6002.928111 | -1.045805605 | 0.190761 | -5.482282 | 4.20E-08 | 2.17E-07 |
| 9688  | TSGA10IP  | 1.091672193 | -1.046207687 | 0.380489 | -2.74964  | 0.005966 | 0.012071 |
| 6671  | KCNIP2    | 28.45822012 | -1.046463053 | 0.264655 | -3.954072 | 7.68E-05 | 0.000226 |
| 1900  | DTYMK     | 399.1863555 | -1.047006132 | 0.147733 | -7.087153 | 1.37E-12 | 1.41E-11 |
| 2537  | RAB34     | 1511.695208 | -1.047358091 | 0.162809 | -6.433067 | 1.25E-10 | 9.66E-10 |
| 8551  | OLAH      | 2.579699464 | -1.04749714  | 0.328478 | -3.18894  | 0.001428 | 0.003273 |
| 2436  | NRM       | 417.9119291 | -1.047760529 | 0.160583 | -6.524714 | 6.81E-11 | 5.48E-10 |
| 13923 | MAS1L     | 0.386520442 | -1.047844746 | 0.780432 | -1.342647 | 0.179386 | 0.252524 |
| 1077  | POP7      | 497.3849729 | -1.047865519 | 0.127859 | -8.195468 | 2.50E-16 | 4.54E-15 |

|       |          |             |              |          |           |          |          |
|-------|----------|-------------|--------------|----------|-----------|----------|----------|
| 2872  | RIMBP3   | 35.87826283 | -1.047884756 | 0.171005 | -6.127795 | 8.91E-10 | 6.08E-09 |
| 5550  | IGSF6    | 212.2923052 | -1.04841355  | 0.233029 | -4.499072 | 6.83E-06 | 2.41E-05 |
| 1942  | BLVRB    | 1391.76744  | -1.048443361 | 0.148899 | -7.041283 | 1.90E-12 | 1.92E-11 |
| 1977  | SHFM1    | 1833.602665 | -1.04921189  | 0.150036 | -6.99306  | 2.69E-12 | 2.67E-11 |
| 11086 | C17orf66 | 1.187148995 | -1.04960754  | 0.464294 | -2.260654 | 0.023781 | 0.042046 |
| 11135 | UPK1A    | 0.953092906 | -1.04997974  | 0.468425 | -2.241512 | 0.024993 | 0.044    |
| 5217  | PTPRU    | 784.688221  | -1.050584931 | 0.22487  | -4.671955 | 2.98E-06 | 1.12E-05 |
| 6416  | SLC13A4  | 4.578773959 | -1.051204822 | 0.258289 | -4.069876 | 4.70E-05 | 0.000144 |
| 4655  | CD48     | 465.322612  | -1.05137103  | 0.212011 | -4.959041 | 7.08E-07 | 2.98E-06 |
| 10820 | KCNH8    | 5.541888402 | -1.05157424  | 0.446621 | -2.354513 | 0.018547 | 0.033601 |
| 5026  | EVI2A    | 508.2322417 | -1.051742061 | 0.220902 | -4.761127 | 1.93E-06 | 7.51E-06 |
| 4432  | CD247    | 188.1778448 | -1.052057002 | 0.207003 | -5.082335 | 3.73E-07 | 1.65E-06 |
| 5358  | C1QTNF2  | 23.7269684  | -1.052113976 | 0.229352 | -4.587341 | 4.49E-06 | 1.64E-05 |
| 14632 | GP2      | 0.720116122 | -1.052405624 | 0.937712 | -1.122312 | 0.26173  | 0.350612 |
| 4689  | COLQ     | 57.05420464 | -1.05344792  | 0.213518 | -4.933767 | 8.07E-07 | 3.37E-06 |
| 15444 | BEST2    | 0.313007447 | -1.053705802 | 1.204191 | -0.875032 | 0.381556 | 0.484288 |
| 6302  | LOC80054 | 21.77205449 | -1.053928759 | 0.255447 | -4.125828 | 3.69E-05 | 0.000115 |
| 8156  | PFKFB1   | 1.544475492 | -1.053948254 | 0.314754 | -3.348483 | 0.000813 | 0.001953 |
| 11739 | C15orf2  | 1.39257099  | -1.053978596 | 0.516342 | -2.041241 | 0.041227 | 0.068838 |
| 1242  | FBL      | 2339.153224 | -1.053981257 | 0.132772 | -7.938293 | 2.05E-15 | 3.23E-14 |
| 6123  | S100Z    | 4.405902404 | -1.05427155  | 0.250382 | -4.210648 | 2.55E-05 | 8.15E-05 |
| 9729  | ALK      | 5.459820632 | -1.054810629 | 0.385181 | -2.738484 | 0.006172 | 0.012435 |
| 2096  | UCK2     | 213.7914526 | -1.054963455 | 0.15396  | -6.8522   | 7.27E-12 | 6.80E-11 |
| 1483  | PLXNA1   | 1306.957699 | -1.055010851 | 0.138899 | -7.595517 | 3.07E-14 | 4.05E-13 |
| 7241  | GAMT     | 1234.032552 | -1.055085512 | 0.282963 | -3.728711 | 0.000192 | 0.000521 |
| 4616  | C14orf80 | 98.43766968 | -1.055370899 | 0.211844 | -4.981837 | 6.30E-07 | 2.67E-06 |
| 4779  | FGD2     | 244.5926046 | -1.055822081 | 0.215667 | -4.895624 | 9.80E-07 | 4.02E-06 |
| 3409  | BTK      | 224.4335687 | -1.057063234 | 0.184124 | -5.741041 | 9.41E-09 | 5.41E-08 |
| 6870  | SH3D20   | 9.535683082 | -1.05713269  | 0.272751 | -3.875817 | 0.000106 | 0.000303 |
| 5856  | KIR2DL4  | 9.366518708 | -1.057141418 | 0.243449 | -4.34235  | 1.41E-05 | 4.72E-05 |
| 7913  | KLRC1    | 12.5912116  | -1.057195963 | 0.307004 | -3.443587 | 0.000574 | 0.001422 |
| 3845  | DPEP2    | 91.0717122  | -1.057870122 | 0.194621 | -5.435552 | 5.46E-08 | 2.78E-07 |
| 6585  | SRCIN1   | 54.95460152 | -1.058038035 | 0.265197 | -3.989635 | 6.62E-05 | 0.000197 |
| 2837  | RPS9     | 15007.98587 | -1.058143828 | 0.17194  | -6.154162 | 7.55E-10 | 5.21E-09 |
| 12622 | C18orf2  | 0.627412389 | -1.058151216 | 0.599364 | -1.765458 | 0.077487 | 0.120331 |
| 1903  | SNRPD2   | 2602.768516 | -1.058545984 | 0.149428 | -7.083968 | 1.40E-12 | 1.44E-11 |
| 5906  | HLA-DRB6 | 699.2485943 | -1.058582532 | 0.245102 | -4.318953 | 1.57E-05 | 5.20E-05 |
| 5702  | SOD3     | 673.9357835 | -1.058601926 | 0.23953  | -4.419498 | 9.89E-06 | 3.40E-05 |
| 2091  | SEC61G   | 1558.786246 | -1.058626529 | 0.154441 | -6.854562 | 7.15E-12 | 6.71E-11 |
| 8465  | MRGPRF   | 82.03937125 | -1.058870999 | 0.328793 | -3.22048  | 0.00128  | 0.002963 |
| 11632 | HPD      | 222.6843485 | -1.059313961 | 0.512241 | -2.068    | 0.03864  | 0.065112 |
| 7591  | SCARNA2  | 7.439254845 | -1.059360642 | 0.295692 | -3.582645 | 0.00034  | 0.000878 |
| 7918  | CD8A     | 726.624115  | -1.05947253  | 0.307875 | -3.44124  | 0.000579 | 0.001433 |
| 11786 | DNER     | 253.5250252 | -1.059591297 | 0.52277  | -2.026878 | 0.042675 | 0.070966 |
| 2669  | ZMYND15  | 100.8612646 | -1.059591975 | 0.167869 | -6.312012 | 2.75E-10 | 2.02E-09 |
| 2668  | MARVELD  | 720.3716522 | -1.059947898 | 0.167858 | -6.314569 | 2.71E-10 | 1.99E-09 |
| 9420  | MRAP2    | 9.695047202 | -1.060211312 | 0.371916 | -2.850672 | 0.004363 | 0.009078 |

|       |           |             |              |          |           |          |          |
|-------|-----------|-------------|--------------|----------|-----------|----------|----------|
| 2219  | SAC3D1    | 110.017215  | -1.06032137  | 0.157405 | -6.736277 | 1.62E-11 | 1.44E-10 |
| 13982 | SCGB2A2   | 0.991561847 | -1.061161644 | 0.801559 | -1.323873 | 0.185545 | 0.260111 |
| 2760  | PSMC3IP   | 72.1490957  | -1.061584143 | 0.170355 | -6.231604 | 4.62E-10 | 3.28E-09 |
| 11286 | CYP2C9    | 35.8679886  | -1.061638766 | 0.48629  | -2.183139 | 0.029026 | 0.05041  |
| 7202  | SCN8A     | 41.0300184  | -1.061670845 | 0.283475 | -3.7452   | 0.00018  | 0.000491 |
| 13929 | SLITRK3   | 0.531102808 | -1.062153384 | 0.791775 | -1.341484 | 0.179764 | 0.252965 |
| 8922  | RACGAP1H  | 1.229185765 | -1.062693435 | 0.349168 | -3.043504 | 0.002338 | 0.005137 |
| 4728  | KIAA0101  | 126.2761468 | -1.062968834 | 0.216102 | -4.918836 | 8.71E-07 | 3.61E-06 |
| 1853  | BCL7C     | 672.6733938 | -1.063670504 | 0.149109 | -7.133515 | 9.78E-13 | 1.03E-11 |
| 1966  | NLGN2     | 448.3682363 | -1.06371009  | 0.151682 | -7.012754 | 2.34E-12 | 2.33E-11 |
| 6349  | CLECL1    | 15.68319707 | -1.064302524 | 0.259311 | -4.104344 | 4.05E-05 | 0.000125 |
| 6926  | CCL4L2    | 173.8063822 | -1.064624577 | 0.276231 | -3.854105 | 0.000116 | 0.000329 |
| 1909  | KRTCAP2   | 1850.295326 | -1.064915369 | 0.150456 | -7.077897 | 1.46E-12 | 1.50E-11 |
| 5698  | OC1001348 | 5.381826797 | -1.065122302 | 0.240919 | -4.421085 | 9.82E-06 | 3.38E-05 |
| 6741  | TIPARP    | 2298.127127 | -1.065290543 | 0.271444 | -3.924527 | 8.69E-05 | 0.000253 |
| 7786  | RET       | 30.49978089 | -1.065462472 | 0.303962 | -3.505248 | 0.000456 | 0.001148 |
| 5119  | HSF2BP    | 12.61194894 | -1.065478212 | 0.225813 | -4.718408 | 2.38E-06 | 9.10E-06 |
| 12073 | GJB4      | 10.52634364 | -1.06555088  | 0.550237 | -1.936531 | 0.052803 | 0.085727 |
| 7411  | BNIPL     | 8.099227739 | -1.065631772 | 0.291879 | -3.650935 | 0.000261 | 0.000691 |
| 10578 | CCL20     | 673.6454674 | -1.065661243 | 0.436295 | -2.442526 | 0.014585 | 0.027026 |
| 10875 | NCAM1     | 800.2386859 | -1.065783868 | 0.457239 | -2.330913 | 0.019758 | 0.035612 |
| 2776  | IFI16     | 3090.880422 | -1.066080511 | 0.171524 | -6.215328 | 5.12E-10 | 3.62E-09 |
| 6645  | IGFBP3    | 58607.86505 | -1.066782899 | 0.269007 | -3.96564  | 7.32E-05 | 0.000216 |
| 4678  | MVK       | 797.9037865 | -1.067144636 | 0.215795 | -4.94517  | 7.61E-07 | 3.19E-06 |
| 1377  | TMED3     | 1701.910114 | -1.067381685 | 0.137597 | -7.757279 | 8.68E-15 | 1.24E-13 |
| 3829  | GPX8      | 1136.656016 | -1.067535145 | 0.195968 | -5.447484 | 5.11E-08 | 2.62E-07 |
| 3724  | APOBEC3C  | 673.745862  | -1.068514291 | 0.193447 | -5.523546 | 3.32E-08 | 1.75E-07 |
| 7329  | PABPC1L   | 371.3450354 | -1.068695796 | 0.2897   | -3.688972 | 0.000225 | 0.000602 |
| 2387  | NUDT17    | 47.15987317 | -1.068698181 | 0.162659 | -6.570186 | 5.03E-11 | 4.13E-10 |
| 8507  | SLC2A5    | 2218.319244 | -1.069115735 | 0.333828 | -3.202598 | 0.001362 | 0.003138 |
| 2572  | EXOSC5    | 421.8432857 | -1.069423963 | 0.166859 | -6.409154 | 1.46E-10 | 1.12E-09 |
| 2754  | COL4A2    | 23115.09356 | -1.069455918 | 0.171466 | -6.237138 | 4.46E-10 | 3.17E-09 |
| 7490  | GRID1     | 72.32379167 | -1.06982606  | 0.295522 | -3.620118 | 0.000294 | 0.000771 |
| 4346  | XRCC2     | 26.8731305  | -1.070332504 | 0.208492 | -5.133694 | 2.84E-07 | 1.28E-06 |
| 3634  | PIK3R5    | 361.5796499 | -1.070984891 | 0.191876 | -5.581639 | 2.38E-08 | 1.29E-07 |
| 5577  | C13orf33  | 204.4785795 | -1.071049085 | 0.238784 | -4.485433 | 7.28E-06 | 2.56E-05 |
| 6079  | CYTL1     | 37.97197866 | -1.071161931 | 0.253247 | -4.229708 | 2.34E-05 | 7.54E-05 |
| 10646 | CLCN1     | 1.443251612 | -1.071636388 | 0.443752 | -2.414946 | 0.015738 | 0.028973 |
| 1805  | CRELD2    | 637.8909892 | -1.072117999 | 0.14923  | -7.184342 | 6.75E-13 | 7.33E-12 |
| 14202 | ANKRD26P  | 0.346535667 | -1.072573907 | 0.854008 | -1.25593  | 0.209141 | 0.288648 |
| 9292  | INA       | 2.126019882 | -1.072915217 | 0.369666 | -2.902392 | 0.003703 | 0.007812 |
| 7600  | S100A2    | 98.71771987 | -1.073078778 | 0.299775 | -3.579608 | 0.000344 | 0.000887 |
| 2646  | MAP3K12   | 282.8036986 | -1.073120451 | 0.169608 | -6.327058 | 2.50E-10 | 1.85E-09 |
| 4584  | PTGIR     | 109.761145  | -1.073695455 | 0.215034 | -4.993147 | 5.94E-07 | 2.54E-06 |
| 5204  | SLC39A14  | 8361.966571 | -1.073708423 | 0.229618 | -4.676065 | 2.92E-06 | 1.10E-05 |
| 4032  | CDC6      | 123.4637232 | -1.074059348 | 0.202021 | -5.316585 | 1.06E-07 | 5.14E-07 |
| 6205  | NUDT8     | 187.1850516 | -1.074376689 | 0.257369 | -4.174466 | 2.99E-05 | 9.44E-05 |

|       |           |             |              |          |           |          |          |
|-------|-----------|-------------|--------------|----------|-----------|----------|----------|
| 540   | CASP4     | 1177.48602  | -1.074859832 | 0.113239 | -9.491967 | 2.27E-21 | 8.23E-20 |
| 8290  | LAMC2     | 329.7964321 | -1.07544197  | 0.32613  | -3.297582 | 0.000975 | 0.002306 |
| 5692  | WNT5A     | 196.8328187 | -1.075681546 | 0.243098 | -4.424895 | 9.65E-06 | 3.32E-05 |
| 5621  | MICALCL   | 7.754089468 | -1.076112431 | 0.241199 | -4.46152  | 8.14E-06 | 2.84E-05 |
| 2068  | PTP4A3    | 1077.149674 | -1.076425351 | 0.156416 | -6.881833 | 5.91E-12 | 5.60E-11 |
| 4941  | PMEPA1    | 3231.390802 | -1.076731403 | 0.22412  | -4.804262 | 1.55E-06 | 6.16E-06 |
| 5285  | SNAI2     | 342.9642066 | -1.076793478 | 0.232469 | -4.631992 | 3.62E-06 | 1.34E-05 |
| 6108  | IER3      | 1912.606442 | -1.076841684 | 0.255299 | -4.217962 | 2.47E-05 | 7.91E-05 |
| 4750  | GPBAR1    | 27.78820198 | -1.076910399 | 0.219385 | -4.908765 | 9.17E-07 | 3.78E-06 |
| 10403 | KCNG1     | 27.87105708 | -1.077096381 | 0.429493 | -2.507833 | 0.012147 | 0.022888 |
| 1459  | INPP5D    | 936.0754026 | -1.077581401 | 0.141301 | -7.626163 | 2.42E-14 | 3.25E-13 |
| 6404  | LOC388242 | 35.98472978 | -1.079217042 | 0.264821 | -4.075274 | 4.60E-05 | 0.000141 |
| 7322  | C1orf70   | 8.05005643  | -1.079861523 | 0.29257  | -3.690949 | 0.000223 | 0.000598 |
| 7223  | TXNDC3    | 7.500457723 | -1.080066763 | 0.289039 | -3.736757 | 0.000186 | 0.000506 |
| 1506  | GPR172A   | 834.1873224 | -1.080546609 | 0.142998 | -7.556378 | 4.14E-14 | 5.39E-13 |
| 8490  | CHST6     | 8.525186044 | -1.080688668 | 0.33649  | -3.21165  | 0.00132  | 0.003047 |
| 5024  | HLX       | 434.1086071 | -1.080703432 | 0.226976 | -4.761315 | 1.92E-06 | 7.50E-06 |
| 10244 | TBX1      | 5.512688163 | -1.081198413 | 0.421115 | -2.567464 | 0.010245 | 0.019602 |
| 3454  | DCBLD2    | 1620.931136 | -1.081680066 | 0.189588 | -5.705434 | 1.16E-08 | 6.59E-08 |
| 400   | PPIH      | 280.0668234 | -1.081799936 | 0.107952 | -10.02109 | 1.23E-23 | 6.03E-22 |
| 5462  | MYL4      | 10.90041414 | -1.081928569 | 0.238462 | -4.537106 | 5.70E-06 | 2.05E-05 |
| 4441  | ZNF703    | 70.98097012 | -1.081937004 | 0.213056 | -5.07819  | 3.81E-07 | 1.68E-06 |
| 1735  | ST3GAL3   | 356.5553317 | -1.082505682 | 0.149087 | -7.26091  | 3.84E-13 | 4.34E-12 |
| 2949  | ROMO1     | 874.0951678 | -1.082691233 | 0.178344 | -6.070791 | 1.27E-09 | 8.46E-09 |
| 2508  | ROBLD3    | 884.7652474 | -1.082833015 | 0.16772  | -6.456194 | 1.07E-10 | 8.39E-10 |
| 4372  | P2RY11    | 128.4804441 | -1.082977818 | 0.211581 | -5.118507 | 3.08E-07 | 1.38E-06 |
| 5573  | KIF18A    | 68.24394613 | -1.084209631 | 0.24161  | -4.487438 | 7.21E-06 | 2.54E-05 |
| 7546  | KLRC2     | 7.244547661 | -1.084836872 | 0.301603 | -3.5969   | 0.000322 | 0.000836 |
| 14610 | MTVR2     | 0.244830447 | -1.084840785 | 0.959742 | -1.130347 | 0.25833  | 0.34658  |
| 10647 | EIF3IP1   | 0.588057717 | -1.084880657 | 0.449235 | -2.41495  | 0.015737 | 0.028973 |
| 9342  | ANKRD1    | 27.8112005  | -1.085088955 | 0.376558 | -2.8816   | 0.003957 | 0.008302 |
| 2454  | OPRL1     | 60.45585862 | -1.086024836 | 0.166831 | -6.509748 | 7.53E-11 | 6.01E-10 |
| 1849  | PSMB3     | 1944.874364 | -1.086225325 | 0.152174 | -7.138053 | 9.47E-13 | 1.00E-11 |
| 1895  | CALU      | 5632.031287 | -1.086327382 | 0.153197 | -7.091054 | 1.33E-12 | 1.38E-11 |
| 8021  | GABRE     | 345.4191509 | -1.087180476 | 0.31938  | -3.404036 | 0.000664 | 0.001623 |
| 5614  | FLJ42289  | 7.982049939 | -1.087736771 | 0.243566 | -4.465886 | 7.97E-06 | 2.78E-05 |
| 2163  | RPL18     | 13478.23514 | -1.088054103 | 0.160048 | -6.798291 | 1.06E-11 | 9.59E-11 |
| 2213  | LMAN2     | 5635.952045 | -1.088271854 | 0.161413 | -6.742154 | 1.56E-11 | 1.38E-10 |
| 6757  | GPM6B     | 66.99027577 | -1.088433208 | 0.27791  | -3.916489 | 8.98E-05 | 0.000261 |
| 4377  | GPR18     | 18.89642611 | -1.08870653  | 0.212807 | -5.115941 | 3.12E-07 | 1.40E-06 |
| 17272 | GAGE2E    | 0.197226747 | -1.089396724 | 2.91407  | -0.37384  | 0.708523 | 0.804062 |
| 4363  | ORC6L     | 56.88546565 | -1.089451814 | 0.212612 | -5.124135 | 2.99E-07 | 1.34E-06 |
| 14755 | LRTM2     | 0.232314136 | -1.089457265 | 1.006765 | -1.082136 | 0.279192 | 0.370887 |
| 14662 | FGF8      | 0.300898863 | -1.089710336 | 0.979283 | -1.112763 | 0.26581  | 0.35535  |
| 2925  | CENPP     | 69.43741883 | -1.089882301 | 0.178873 | -6.093057 | 1.11E-09 | 7.42E-09 |
| 14171 | HULC      | 0.271289149 | -1.090167303 | 0.861752 | -1.26506  | 0.20585  | 0.284727 |
| 913   | MPZL1     | 3510.072054 | -1.090442434 | 0.128359 | -8.495285 | 1.97E-17 | 4.24E-16 |



|       |          |             |              |          |           |          |          |
|-------|----------|-------------|--------------|----------|-----------|----------|----------|
| 16051 | RLBP1    | 0.251260597 | -1.090560871 | 1.564186 | -0.697207 | 0.485673 | 0.59309  |
| 1412  | MAD1L1   | 428.1724448 | -1.09090115  | 0.141953 | -7.684958 | 1.53E-14 | 2.12E-13 |
| 3759  | PPL      | 776.2538847 | -1.091111869 | 0.198362 | -5.500611 | 3.78E-08 | 1.97E-07 |
| 5964  | ETV2     | 11.43170675 | -1.091434557 | 0.254706 | -4.285083 | 1.83E-05 | 6.00E-05 |
| 8739  | CLEC4D   | 6.984730209 | -1.092558844 | 0.351018 | -3.112541 | 0.001855 | 0.00416  |
| 3730  | CARD16   | 296.949907  | -1.092816669 | 0.198016 | -5.518823 | 3.41E-08 | 1.79E-07 |
| 8890  | FZD10    | 18.81840508 | -1.093121756 | 0.357673 | -3.056205 | 0.002242 | 0.004942 |
| 14565 | PDYN     | 0.312754467 | -1.093427722 | 0.953182 | -1.147134 | 0.251326 | 0.338225 |
| 6796  | CACNA2D  | 23.44109491 | -1.094024713 | 0.280457 | -3.900867 | 9.58E-05 | 0.000276 |
| 13021 | SIX3     | 1.162554605 | -1.094692143 | 0.66874  | -1.636947 | 0.101642 | 0.153005 |
| 5482  | C11orf45 | 69.40821088 | -1.094915457 | 0.24172  | -4.529685 | 5.91E-06 | 2.11E-05 |
| 7264  | IL7R     | 162.2216531 | -1.095309088 | 0.294529 | -3.718844 | 0.0002   | 0.00054  |
| 5545  | EMR2     | 395.9850408 | -1.095329931 | 0.243387 | -4.500367 | 6.78E-06 | 2.40E-05 |
| 8382  | SERPIND1 | 3.012775907 | -1.095378446 | 0.336216 | -3.257965 | 0.001122 | 0.002624 |
| 11234 | C12orf70 | 1.189107676 | -1.095626647 | 0.496582 | -2.206336 | 0.02736  | 0.047738 |
| 2063  | ANXA2P1  | 50.17989361 | -1.096657944 | 0.159282 | -6.88501  | 5.78E-12 | 5.49E-11 |
| 8188  | MEOX1    | 15.20097732 | -1.096743107 | 0.328487 | -3.338773 | 0.000841 | 0.002014 |
| 10008 | FBXW10   | 1.294127693 | -1.096793582 | 0.413823 | -2.650391 | 0.00804  | 0.015746 |
| 12729 | DRD5     | 0.418122423 | -1.097334502 | 0.636774 | -1.723273 | 0.084839 | 0.130631 |
| 985   | ALG3     | 823.8367239 | -1.097423122 | 0.131166 | -8.366691 | 5.93E-17 | 1.18E-15 |
| 6155  | DEPDC1B  | 55.32353156 | -1.097592407 | 0.26132  | -4.200182 | 2.67E-05 | 8.49E-05 |
| 9547  | CPNE9    | 3.159169341 | -1.097670276 | 0.39173  | -2.802109 | 0.005077 | 0.010424 |
| 9833  | LOC40146 | 1.666477402 | -1.098400182 | 0.405575 | -2.708252 | 0.006764 | 0.013483 |
| 9611  | CLEC6A   | 2.051447094 | -1.099371274 | 0.396121 | -2.775344 | 0.005514 | 0.011246 |
| 4885  | IFI30    | 5225.104996 | -1.099790359 | 0.227444 | -4.835436 | 1.33E-06 | 5.33E-06 |
| 6867  | AQPEP    | 4.438623407 | -1.099872328 | 0.283749 | -3.876209 | 0.000106 | 0.000303 |
| 450   | TMEM189  | 874.5490963 | -1.100204824 | 0.112228 | -9.803303 | 1.09E-22 | 4.75E-21 |
| 9889  | NLRP7    | 4.044309259 | -1.100741179 | 0.409038 | -2.691047 | 0.007123 | 0.014118 |
| 4436  | GAS7     | 403.8448539 | -1.100806841 | 0.216672 | -5.080519 | 3.76E-07 | 1.66E-06 |
| 8409  | ISP90AB4 | 2.099194493 | -1.101161512 | 0.339197 | -3.246381 | 0.001169 | 0.002724 |
| 9970  | FBLL1    | 4.997497788 | -1.101647224 | 0.41367  | -2.663103 | 0.007742 | 0.015221 |
| 7576  | REEP6    | 86.3336864  | -1.101797798 | 0.307135 | -3.58734  | 0.000334 | 0.000864 |
| 2791  | CSF1     | 921.4609606 | -1.102220824 | 0.177795 | -6.199385 | 5.67E-10 | 3.98E-09 |
| 3947  | HSPA6    | 252.529742  | -1.10260288  | 0.205056 | -5.377095 | 7.57E-08 | 3.76E-07 |
| 2531  | ADCY7    | 623.1839927 | -1.102772822 | 0.171282 | -6.438331 | 1.21E-10 | 9.35E-10 |
| 3812  | NAIP     | 97.74659697 | -1.102779208 | 0.201775 | -5.465378 | 4.62E-08 | 2.38E-07 |
| 5793  | DUSP2    | 180.9499159 | -1.102850566 | 0.251971 | -4.37689  | 1.20E-05 | 4.07E-05 |
| 255   | RHOG     | 1281.95603  | -1.102970687 | 0.102008 | -10.81261 | 3.00E-27 | 2.31E-25 |
| 8708  | VAX2     | 8.025583443 | -1.103230123 | 0.352797 | -3.127092 | 0.001765 | 0.003974 |
| 4748  | TLR6     | 41.347098   | -1.103626177 | 0.224797 | -4.909426 | 9.13E-07 | 3.77E-06 |
| 6153  | TCF15    | 18.72706119 | -1.104284484 | 0.262809 | -4.201845 | 2.65E-05 | 8.43E-05 |
| 11240 | WISP3    | 2.086396017 | -1.104470088 | 0.501182 | -2.203733 | 0.027543 | 0.048031 |
| 1777  | GIYD2    | 616.2439459 | -1.104565226 | 0.153237 | -7.208228 | 5.67E-13 | 6.25E-12 |
| 5280  | SIGLEC5  | 44.1751662  | -1.105274148 | 0.238432 | -4.635595 | 3.56E-06 | 1.32E-05 |
| 2307  | BFSP1    | 31.45786813 | -1.105288381 | 0.166251 | -6.648312 | 2.96E-11 | 2.52E-10 |
| 14683 | CST4     | 0.451954281 | -1.105368589 | 0.998081 | -1.107494 | 0.26808  | 0.357884 |
| 5914  | ADAMTS2  | 265.0801877 | -1.105712499 | 0.256191 | -4.315972 | 1.59E-05 | 5.27E-05 |

|       |           |             |              |          |           |          |          |
|-------|-----------|-------------|--------------|----------|-----------|----------|----------|
| 4105  | SPATA9    | 6.197589843 | -1.106123264 | 0.209533 | -5.278982 | 1.30E-07 | 6.20E-07 |
| 3557  | NLRP3     | 128.1228    | -1.106576572 | 0.196573 | -5.62933  | 1.81E-08 | 9.97E-08 |
| 8266  | PAK3      | 13.19256788 | -1.106762167 | 0.33482  | -3.305545 | 0.000948 | 0.002248 |
| 5032  | ENOX1     | 26.64540617 | -1.107225464 | 0.232663 | -4.758933 | 1.95E-06 | 7.58E-06 |
| 384   | HM13      | 3934.21161  | -1.107436061 | 0.109505 | -10.11311 | 4.83E-24 | 2.47E-22 |
| 11305 | GRIA1     | 14.69110624 | -1.108138907 | 0.508933 | -2.177378 | 0.029452 | 0.051066 |
| 1516  | LOC650368 | 35.43545095 | -1.108356689 | 0.146936 | -7.543151 | 4.59E-14 | 5.93E-13 |
| 13625 | GAL       | 1.003200688 | -1.108555515 | 0.765918 | -1.447356 | 0.147797 | 0.212622 |
| 7878  | DUSP27    | 3.974148145 | -1.109217654 | 0.320594 | -3.459883 | 0.00054  | 0.001345 |
| 9853  | UPK3A     | 2.569743511 | -1.10973129  | 0.41071  | -2.701984 | 0.006893 | 0.013712 |
| 439   | BID       | 495.9587057 | -1.109750274 | 0.112555 | -9.859612 | 6.23E-23 | 2.78E-21 |
| 6559  | TMEM52    | 10.56309299 | -1.11025495  | 0.277435 | -4.001863 | 6.28E-05 | 0.000188 |
| 1135  | ADAP2     | 527.4955579 | -1.110464751 | 0.13693  | -8.109702 | 5.07E-16 | 8.76E-15 |
| 5940  | ZAP70     | 152.0437817 | -1.110702941 | 0.258434 | -4.297812 | 1.72E-05 | 5.69E-05 |
| 14115 | SCN10A    | 0.357095514 | -1.111457671 | 0.866848 | -1.282183 | 0.199779 | 0.277425 |
| 727   | TAX1BP3   | 2150.775158 | -1.111937154 | 0.124277 | -8.947212 | 3.65E-19 | 9.83E-18 |
| 7877  | ABCA4     | 12.1678148  | -1.112022935 | 0.321268 | -3.461357 | 0.000537 | 0.001337 |
| 3915  | CCNA2     | 179.1295495 | -1.112118321 | 0.206193 | -5.393585 | 6.91E-08 | 3.46E-07 |
| 1712  | PGLS      | 1173.98815  | -1.112437352 | 0.152705 | -7.284889 | 3.22E-13 | 3.68E-12 |
| 3327  | FKBP1B    | 56.23148175 | -1.112860503 | 0.191938 | -5.798032 | 6.71E-09 | 3.95E-08 |
| 11373 | MYBPH     | 1.091873671 | -1.112880384 | 0.515198 | -2.160104 | 0.030765 | 0.053022 |
| 7102  | PHKG1     | 6.81935612  | -1.113534954 | 0.294396 | -3.782436 | 0.000155 | 0.000429 |
| 992   | REEP4     | 338.56349   | -1.113859214 | 0.133261 | -8.358458 | 6.35E-17 | 1.26E-15 |
| 9028  | COL6A4P2  | 4.453598861 | -1.113915034 | 0.370927 | -3.003056 | 0.002673 | 0.005803 |
| 8119  | ERC2      | 13.41296443 | -1.114203935 | 0.331317 | -3.362955 | 0.000771 | 0.001862 |
| 3540  | LSMD1     | 607.1018982 | -1.114269005 | 0.197513 | -5.641485 | 1.69E-08 | 9.33E-08 |
| 3624  | CECR6     | 26.42493196 | -1.114937695 | 0.199425 | -5.590749 | 2.26E-08 | 1.22E-07 |
| 13891 | CHRND     | 0.515845337 | -1.115152186 | 0.825178 | -1.351408 | 0.176565 | 0.249143 |
| 7361  | ERMN      | 16.27838085 | -1.115559522 | 0.303672 | -3.673569 | 0.000239 | 0.000637 |
| 458   | PTPN6     | 1004.73741  | -1.117240712 | 0.114397 | -9.766334 | 1.57E-22 | 6.72E-21 |
| 12614 | LPAR3     | 1.112098704 | -1.117666691 | 0.632373 | -1.767417 | 0.077158 | 0.1199   |
| 2373  | 44078     | 724.2594295 | -1.11775941  | 0.169721 | -6.585859 | 4.52E-11 | 3.74E-10 |
| 7456  | RANBP17   | 38.53854902 | -1.118240917 | 0.307682 | -3.634408 | 0.000279 | 0.000732 |
| 1956  | S100A16   | 2507.875292 | -1.118478245 | 0.1592   | -7.025637 | 2.13E-12 | 2.14E-11 |
| 10386 | CYP4F3    | 81.39129776 | -1.118875902 | 0.445591 | -2.510996 | 0.012039 | 0.022721 |
| 4745  | PDCD1LG2  | 113.5634472 | -1.118900861 | 0.227819 | -4.911349 | 9.05E-07 | 3.74E-06 |
| 12905 | CYP4F2    | 19.67214148 | -1.119361172 | 0.669429 | -1.672113 | 0.094502 | 0.143536 |
| 7015  | CNR1      | 63.70820033 | -1.120732916 | 0.293589 | -3.817347 | 0.000135 | 0.000377 |
| 1985  | FBXO6     | 348.0326282 | -1.121881691 | 0.160625 | -6.984469 | 2.86E-12 | 2.82E-11 |
| 5927  | CCR6      | 128.8858923 | -1.122222652 | 0.260545 | -4.307214 | 1.65E-05 | 5.47E-05 |
| 7609  | ISLR2     | 12.75659536 | -1.122239676 | 0.313756 | -3.576788 | 0.000348 | 0.000896 |
| 9692  | C3orf57   | 5.189996306 | -1.122651275 | 0.408462 | -2.748484 | 0.005987 | 0.012107 |
| 13065 | TTY10     | 0.471897385 | -1.12296436  | 0.691254 | -1.624533 | 0.104262 | 0.156421 |
| 4855  | CRNA0011  | 285.1028308 | -1.124354957 | 0.23127  | -4.861661 | 1.16E-06 | 4.70E-06 |
| 3400  | FAM176B   | 297.9319385 | -1.125189674 | 0.19574  | -5.748388 | 9.01E-09 | 5.19E-08 |
| 1350  | MTHFD1L   | 494.1962005 | -1.125737799 | 0.144334 | -7.799548 | 6.21E-15 | 9.02E-14 |
| 584   | TWF2      | 998.3819452 | -1.126111666 | 0.120185 | -9.369823 | 7.27E-21 | 2.44E-19 |

|       |           |             |              |          |           |          |          |
|-------|-----------|-------------|--------------|----------|-----------|----------|----------|
| 8097  | MATN3     | 73.22827552 | -1.126910168 | 0.33415  | -3.37247  | 0.000745 | 0.001803 |
| 3386  | CCDC109B  | 219.8266758 | -1.12793458  | 0.195958 | -5.756009 | 8.61E-09 | 4.99E-08 |
| 5988  | LOC400931 | 35.11793238 | -1.128021037 | 0.263886 | -4.274661 | 1.91E-05 | 6.27E-05 |
| 3244  | RASAL3    | 294.8089685 | -1.128160435 | 0.192646 | -5.85612  | 4.74E-09 | 2.86E-08 |
| 9093  | FLG2      | 2.232994295 | -1.128469028 | 0.378772 | -2.97928  | 0.002889 | 0.006228 |
| 8088  | LILRA4    | 24.81289965 | -1.128704629 | 0.334432 | -3.374992 | 0.000738 | 0.001789 |
| 4379  | ITGAX     | 735.1261701 | -1.128787761 | 0.220676 | -5.115126 | 3.14E-07 | 1.40E-06 |
| 1579  | POLR2J    | 1130.654567 | -1.128907072 | 0.151414 | -7.455758 | 8.94E-14 | 1.11E-12 |
| 5128  | NPR1      | 1223.680158 | -1.129624434 | 0.239597 | -4.714692 | 2.42E-06 | 9.25E-06 |
| 13540 | HIST1H3B  | 0.341409461 | -1.130182116 | 0.767013 | -1.473486 | 0.14062  | 0.203567 |
| 10908 | TCERG1L   | 1.864499417 | -1.130599057 | 0.487646 | -2.318484 | 0.020423 | 0.036699 |
| 739   | EFNA4     | 121.684751  | -1.1307129   | 0.126801 | -8.917239 | 4.78E-19 | 1.27E-17 |
| 5302  | BGN       | 20233.5436  | -1.130780235 | 0.24475  | -4.620141 | 3.83E-06 | 1.42E-05 |
| 1318  | RP9P      | 213.4831581 | -1.131236427 | 0.144308 | -7.83902  | 4.54E-15 | 6.76E-14 |
| 7056  | C12orf53  | 13.00589718 | -1.131487932 | 0.29787  | -3.7986   | 0.000146 | 0.000404 |
| 2656  | PLEKHA4   | 728.3241516 | -1.131893172 | 0.179057 | -6.321414 | 2.59E-10 | 1.91E-09 |
| 4610  | SLC9A9    | 557.1599188 | -1.132253605 | 0.227178 | -4.984003 | 6.23E-07 | 2.65E-06 |
| 8860  | CNTN2     | 4.959830589 | -1.132572394 | 0.369407 | -3.065922 | 0.00217  | 0.0048   |
| 2993  | PLCXD1    | 195.7411121 | -1.133361302 | 0.187571 | -6.042292 | 1.52E-09 | 9.95E-09 |
| 1235  | NME2      | 7203.087095 | -1.133622456 | 0.14253  | -7.953558 | 1.81E-15 | 2.88E-14 |
| 5234  | MCOLN2    | 45.02411088 | -1.133970477 | 0.243343 | -4.659977 | 3.16E-06 | 1.18E-05 |
| 839   | SLC12A9   | 928.0796518 | -1.134164683 | 0.131089 | -8.651854 | 5.07E-18 | 1.18E-16 |
| 2011  | RPL29     | 8345.527503 | -1.13416552  | 0.163285 | -6.945941 | 3.76E-12 | 3.66E-11 |
| 4291  | GPR55     | 16.65105564 | -1.134290914 | 0.219816 | -5.160182 | 2.47E-07 | 1.13E-06 |
| 1307  | RIN3      | 787.1436892 | -1.134316845 | 0.144428 | -7.853873 | 4.03E-15 | 6.05E-14 |
| 2202  | MEX3B     | 67.70984316 | -1.134353737 | 0.167985 | -6.752729 | 1.45E-11 | 1.29E-10 |
| 8101  | WNT5B     | 85.88005052 | -1.135696346 | 0.336918 | -3.370841 | 0.000749 | 0.001813 |
| 982   | ADAM15    | 1622.172533 | -1.135806821 | 0.135677 | -8.371416 | 5.69E-17 | 1.14E-15 |
| 7290  | DC1001282 | 4.610402539 | -1.135809482 | 0.306765 | -3.702536 | 0.000213 | 0.000574 |
| 5171  | FPR3      | 825.2939564 | -1.135812782 | 0.2422   | -4.689557 | 2.74E-06 | 1.04E-05 |
| 14064 | FAM75C1   | 0.535852951 | -1.135997718 | 0.875271 | -1.297882 | 0.194328 | 0.270835 |
| 2291  | VIM       | 83217.49551 | -1.136075635 | 0.17051  | -6.6628   | 2.69E-11 | 2.30E-10 |
| 12745 | LGI1      | 0.90928759  | -1.136241105 | 0.660929 | -1.719157 | 0.085586 | 0.131625 |
| 5507  | POMC      | 17.87234108 | -1.136668155 | 0.251718 | -4.515641 | 6.31E-06 | 2.25E-05 |
| 7939  | NDUFA4L2  | 30565.71053 | -1.136854279 | 0.331196 | -3.432571 | 0.000598 | 0.001476 |
| 7073  | EMILIN3   | 11.33735994 | -1.136963999 | 0.299658 | -3.794209 | 0.000148 | 0.00041  |
| 7691  | CEBPE     | 1.778787445 | -1.13699094  | 0.320888 | -3.543264 | 0.000395 | 0.001007 |
| 11462 | LOC26102  | 1.010408667 | -1.137469792 | 0.533681 | -2.131365 | 0.033059 | 0.056534 |
| 6985  | DHRS9     | 38.03039318 | -1.137628788 | 0.296893 | -3.831785 | 0.000127 | 0.000357 |
| 13864 | CHRNA9    | 0.303002292 | -1.137998776 | 0.834803 | -1.363195 | 0.172821 | 0.244335 |
| 4792  | PRAM1     | 68.65239113 | -1.138048959 | 0.23271  | -4.890415 | 1.01E-06 | 4.12E-06 |
| 429   | CD276     | 1927.001609 | -1.138073411 | 0.114845 | -9.909647 | 3.78E-23 | 1.72E-21 |
| 8869  | DC1001335 | 9.649951607 | -1.138077903 | 0.371524 | -3.063273 | 0.002189 | 0.004838 |
| 5931  | DC1001285 | 2.667491159 | -1.138216674 | 0.264465 | -4.303841 | 1.68E-05 | 5.55E-05 |
| 4886  | CD96      | 234.205473  | -1.138846734 | 0.235595 | -4.833917 | 1.34E-06 | 5.37E-06 |
| 6395  | CTSW      | 270.2698633 | -1.138926307 | 0.279326 | -4.077407 | 4.55E-05 | 0.00014  |
| 9465  | CXCL1     | 203.3095522 | -1.139378505 | 0.402368 | -2.831682 | 0.00463  | 0.009589 |

|       |           |             |              |          |           |          |          |
|-------|-----------|-------------|--------------|----------|-----------|----------|----------|
| 1517  | TMEM86B   | 75.70879217 | -1.139396649 | 0.151169 | -7.537232 | 4.80E-14 | 6.20E-13 |
| 5677  | TTK       | 64.21424969 | -1.139687928 | 0.257037 | -4.433942 | 9.25E-06 | 3.19E-05 |
| 3998  | C2orf81   | 107.1974694 | -1.139783953 | 0.213372 | -5.341779 | 9.20E-08 | 4.51E-07 |
| 9287  | IGF2BP1   | 140.7025938 | -1.140172861 | 0.39247  | -2.905118 | 0.003671 | 0.007748 |
| 9984  | CRLF1     | 35.12166689 | -1.140355646 | 0.429014 | -2.658088 | 0.007859 | 0.015428 |
| 776   | EFHD2     | 1658.831134 | -1.140377568 | 0.129239 | -8.823815 | 1.11E-18 | 2.79E-17 |
| 4073  | TPST2     | 878.4706639 | -1.140602131 | 0.215429 | -5.294563 | 1.19E-07 | 5.74E-07 |
| 7542  | JAKMIP1   | 32.25088667 | -1.14069318  | 0.31698  | -3.598625 | 0.00032  | 0.000831 |
| 6067  | A1BG      | 64.26450308 | -1.140807239 | 0.269256 | -4.236889 | 2.27E-05 | 7.32E-05 |
| 5714  | SCARB1    | 6835.38432  | -1.141264991 | 0.258559 | -4.413936 | 1.02E-05 | 3.48E-05 |
| 1117  | G6PD      | 900.6723201 | -1.142003968 | 0.140332 | -8.13785  | 4.02E-16 | 7.06E-15 |
| 6483  | ZNF804A   | 17.08149741 | -1.142042089 | 0.282998 | -4.03552  | 5.45E-05 | 0.000165 |
| 10669 | LOC647309 | 8.124372219 | -1.142238082 | 0.47499  | -2.40476  | 0.016183 | 0.029731 |
| 4351  | PID1      | 103.1833793 | -1.142443884 | 0.222686 | -5.130286 | 2.89E-07 | 1.30E-06 |
| 4801  | CCL4      | 279.2079199 | -1.142861965 | 0.233906 | -4.885994 | 1.03E-06 | 4.20E-06 |
| 3360  | C9orf142  | 327.4451334 | -1.143256653 | 0.198087 | -5.771477 | 7.86E-09 | 4.58E-08 |
| 2342  | LRRC61    | 500.0219299 | -1.144018798 | 0.172928 | -6.615585 | 3.70E-11 | 3.10E-10 |
| 3256  | C20orf118 | 51.73773928 | -1.144088676 | 0.195625 | -5.848371 | 4.96E-09 | 2.99E-08 |
| 1248  | B4GALT2   | 796.8652338 | -1.14422376  | 0.14424  | -7.932767 | 2.14E-15 | 3.37E-14 |
| 4462  | HMOX1     | 7000.787022 | -1.1443185   | 0.226064 | -5.061916 | 4.15E-07 | 1.82E-06 |
| 7692  | HRH4      | 2.145323468 | -1.144663157 | 0.323069 | -3.54309  | 0.000395 | 0.001008 |
| 5185  | LOC257358 | 5.286042751 | -1.145020081 | 0.244512 | -4.682873 | 2.83E-06 | 1.07E-05 |
| 2578  | SLC29A3   | 253.8092742 | -1.14518446  | 0.178829 | -6.403791 | 1.52E-10 | 1.15E-09 |
| 2579  | C7orf50   | 1416.27984  | -1.145442645 | 0.178883 | -6.403307 | 1.52E-10 | 1.16E-09 |
| 6250  | TNFRSF25  | 82.24006798 | -1.145925716 | 0.275814 | -4.154712 | 3.26E-05 | 0.000102 |
| 14618 | KRT82     | 0.245686851 | -1.146130101 | 1.016676 | -1.127331 | 0.259603 | 0.348096 |
| 5367  | CENPE     | 99.48261628 | -1.146550287 | 0.250116 | -4.584078 | 4.56E-06 | 1.67E-05 |
| 15383 | C14orf115 | 0.380340348 | -1.146774362 | 1.282602 | -0.8941   | 0.371268 | 0.47307  |
| 16100 | CSRP3     | 0.225350421 | -1.147171408 | 1.6843   | -0.681097 | 0.49581  | 0.603626 |
| 2045  | DGKA      | 303.4291555 | -1.147201377 | 0.165928 | -6.913847 | 4.72E-12 | 4.52E-11 |
| 3883  | LOC729234 | 34.43191548 | -1.147343044 | 0.211962 | -5.412972 | 6.20E-08 | 3.13E-07 |
| 5543  | ABLIM2    | 152.9490878 | -1.14735743  | 0.254902 | -4.501166 | 6.76E-06 | 2.39E-05 |
| 11653 | LCT       | 0.577155201 | -1.14751036  | 0.556836 | -2.060769 | 0.039325 | 0.066149 |
| 9976  | TUSC5     | 1.486528127 | -1.147564182 | 0.431205 | -2.661295 | 0.007784 | 0.015294 |
| 12926 | LHX1      | 11.1221726  | -1.147665962 | 0.689036 | -1.665611 | 0.095791 | 0.145257 |
| 5145  | CLDN14    | 20.42602608 | -1.148376629 | 0.244092 | -4.704696 | 2.54E-06 | 9.69E-06 |
| 10388 | C7orf69   | 0.747914052 | -1.148556429 | 0.457518 | -2.510409 | 0.012059 | 0.022754 |
| 4053  | LRRC25    | 367.8099643 | -1.149065383 | 0.21663  | -5.304276 | 1.13E-07 | 5.47E-07 |
| 2787  | CHAF1B    | 88.26150933 | -1.149181448 | 0.18522  | -6.204421 | 5.49E-10 | 3.86E-09 |
| 7945  | CXCR1     | 27.1679929  | -1.149732464 | 0.335216 | -3.429826 | 0.000604 | 0.00149  |
| 1804  | DUSP10    | 183.3176339 | -1.149770906 | 0.160035 | -7.184505 | 6.75E-13 | 7.33E-12 |
| 4707  | MCM10     | 41.01384507 | -1.149871641 | 0.233318 | -4.928345 | 8.29E-07 | 3.45E-06 |
| 12692 | CYorf15B  | 90.20554777 | -1.151211986 | 0.663013 | -1.736335 | 0.082505 | 0.127417 |
| 2168  | SHISA4    | 189.484804  | -1.1514491   | 0.169457 | -6.794922 | 1.08E-11 | 9.80E-11 |
| 11615 | PITX1     | 33.52915237 | -1.152771477 | 0.555113 | -2.076643 | 0.037834 | 0.063848 |
| 8312  | TMEM84    | 11.67051416 | -1.154539885 | 0.351172 | -3.287675 | 0.00101  | 0.002382 |
| 1558  | TAF10     | 953.745461  | -1.155110373 | 0.154356 | -7.483437 | 7.24E-14 | 9.11E-13 |

|       |           |             |              |          |           |          |          |
|-------|-----------|-------------|--------------|----------|-----------|----------|----------|
| 2198  | B4GALT7   | 918.4016397 | -1.155204821 | 0.170892 | -6.759836 | 1.38E-11 | 1.23E-10 |
| 6452  | CUX2      | 2.433251885 | -1.155478988 | 0.285465 | -4.04771  | 5.17E-05 | 0.000157 |
| 767   | YIF1B     | 469.9453278 | -1.155544195 | 0.130689 | -8.841961 | 9.41E-19 | 2.40E-17 |
| 1692  | NMRAL1    | 822.0606303 | -1.155932407 | 0.158256 | -7.304211 | 2.79E-13 | 3.23E-12 |
| 619   | TMSL3     | 32658.98984 | -1.156102949 | 0.124963 | -9.251549 | 2.21E-20 | 7.01E-19 |
| 1286  | C1RL      | 1328.409212 | -1.156506454 | 0.146774 | -7.879499 | 3.29E-15 | 5.01E-14 |
| 7454  | CHRN2     | 10.68814592 | -1.156795134 | 0.318265 | -3.634689 | 0.000278 | 0.000732 |
| 10527 | C7orf65   | 0.901969472 | -1.157830588 | 0.470543 | -2.460625 | 0.01387  | 0.025822 |
| 9261  | ODZ2      | 79.78532827 | -1.157990965 | 0.397633 | -2.912209 | 0.003589 | 0.007596 |
| 5890  | FCRL6     | 46.37324069 | -1.159602592 | 0.26808  | -4.325577 | 1.52E-05 | 5.06E-05 |
| 5990  | LRR3      | 39.77114033 | -1.159816786 | 0.271375 | -4.273853 | 1.92E-05 | 6.29E-05 |
| 12130 | KRT13     | 5.930490014 | -1.160176417 | 0.604946 | -1.917818 | 0.055134 | 0.089087 |
| 7457  | CD8B      | 172.1170477 | -1.160344412 | 0.319275 | -3.634315 | 0.000279 | 0.000733 |
| 13739 | MYF6      | 0.532815807 | -1.160402732 | 0.825973 | -1.404892 | 0.160053 | 0.228343 |
| 5738  | SLAMF6    | 213.4153762 | -1.160433945 | 0.263583 | -4.402538 | 1.07E-05 | 3.65E-05 |
| 6565  | ZNF695    | 6.771440025 | -1.161324989 | 0.29047  | -3.998085 | 6.39E-05 | 0.000191 |
| 1543  | TNFRSF1B  | 1661.741447 | -1.161559401 | 0.154856 | -7.500879 | 6.34E-14 | 8.05E-13 |
| 7529  | PIPOX     | 338.0087831 | -1.161584964 | 0.322247 | -3.604637 | 0.000313 | 0.000814 |
| 3355  | CHPF      | 3311.168098 | -1.162015467 | 0.201155 | -5.776707 | 7.62E-09 | 4.45E-08 |
| 6410  | PCDHB17   | 10.09710909 | -1.162572652 | 0.285533 | -4.071591 | 4.67E-05 | 0.000143 |
| 3888  | MGC87042  | 14.31846015 | -1.1627905   | 0.214968 | -5.409135 | 6.33E-08 | 3.19E-07 |
| 5918  | EFS       | 123.3624897 | -1.163008419 | 0.26962  | -4.313507 | 1.61E-05 | 5.32E-05 |
| 2285  | MYL9      | 5817.075534 | -1.163456657 | 0.174496 | -6.667538 | 2.60E-11 | 2.23E-10 |
| 1525  | CD97      | 1985.228092 | -1.163482729 | 0.15467  | -7.522361 | 5.38E-14 | 6.91E-13 |
| 4489  | IFI6      | 2065.886621 | -1.163828905 | 0.230636 | -5.04617  | 4.51E-07 | 1.97E-06 |
| 8415  | LOC644172 | 30.72581348 | -1.164978547 | 0.359161 | -3.24361  | 0.00118  | 0.002749 |
| 4183  | P2RX5     | 45.83168134 | -1.165223141 | 0.223195 | -5.220656 | 1.78E-07 | 8.35E-07 |
| 2687  | ARHGAP30  | 737.3191104 | -1.165315108 | 0.185196 | -6.292327 | 3.13E-10 | 2.28E-09 |
| 3960  | GRAMD4    | 2155.342865 | -1.165434389 | 0.217024 | -5.370062 | 7.87E-08 | 3.90E-07 |
| 2968  | ATXN7L2   | 96.28220551 | -1.165582423 | 0.192449 | -6.056592 | 1.39E-09 | 9.18E-09 |
| 330   | SHC1      | 4429.550288 | -1.165877902 | 0.112073 | -10.40283 | 2.41E-25 | 1.43E-23 |
| 2680  | GPC1      | 1455.614307 | -1.167210938 | 0.185296 | -6.299159 | 2.99E-10 | 2.19E-09 |
| 3049  | NLGN3     | 18.92269728 | -1.16739834  | 0.194505 | -6.0019   | 1.95E-09 | 1.25E-08 |
| 11985 | HIGD2B    | 0.489456744 | -1.168179939 | 0.594711 | -1.96428  | 0.049498 | 0.080951 |
| 6707  | SCUBE3    | 37.98072755 | -1.168474987 | 0.296646 | -3.938959 | 8.18E-05 | 0.000239 |
| 4011  | PDIA5     | 1749.882396 | -1.168581422 | 0.219065 | -5.334401 | 9.59E-08 | 4.68E-07 |
| 2434  | HLA-DPB1  | 7838.078625 | -1.169247448 | 0.179123 | -6.527625 | 6.68E-11 | 5.38E-10 |
| 13767 | NEUROG3   | 0.459421321 | -1.16933781  | 0.837327 | -1.396512 | 0.16256  | 0.231448 |
| 4330  | CD300A    | 440.6768745 | -1.169821685 | 0.227494 | -5.142211 | 2.72E-07 | 1.23E-06 |
| 2542  | E2F1      | 146.6400505 | -1.170042239 | 0.181987 | -6.429245 | 1.28E-10 | 9.88E-10 |
| 10423 | KCNK2     | 36.50999298 | -1.170123754 | 0.467602 | -2.50239  | 0.012336 | 0.023198 |
| 11574 | NPC1L1    | 98.28172467 | -1.171100713 | 0.559992 | -2.091282 | 0.036503 | 0.061819 |
| 6151  | ELOVL2    | 126.496311  | -1.171416189 | 0.278759 | -4.202248 | 2.64E-05 | 8.42E-05 |
| 7218  | GPR173    | 24.64981819 | -1.171601058 | 0.313405 | -3.738297 | 0.000185 | 0.000503 |
| 6406  | GLI1      | 52.90615399 | -1.171930755 | 0.287602 | -4.074836 | 4.60E-05 | 0.000141 |
| 4097  | KCNE2     | 10.61244066 | -1.172028164 | 0.22188  | -5.282265 | 1.28E-07 | 6.10E-07 |
| 7656  | C11orf70  | 42.94310878 | -1.17239585  | 0.329628 | -3.556729 | 0.000376 | 0.000961 |

|       |           |             |              |          |           |          |          |
|-------|-----------|-------------|--------------|----------|-----------|----------|----------|
| 4129  | C17orf87  | 42.14710522 | -1.172675752 | 0.222807 | -5.263186 | 1.42E-07 | 6.72E-07 |
| 3054  | LCPI      | 3362.772734 | -1.173025991 | 0.195608 | -5.996831 | 2.01E-09 | 1.29E-08 |
| 2821  | APOB48R   | 268.2897882 | -1.173046318 | 0.190116 | -6.170154 | 6.82E-10 | 4.74E-09 |
| 9930  | C9        | 28.69113954 | -1.174006196 | 0.438527 | -2.677161 | 0.007425 | 0.014656 |
| 9363  | VSX1      | 5.422528907 | -1.17446134  | 0.408408 | -2.875704 | 0.004031 | 0.008439 |
| 4227  | CD28      | 99.63717627 | -1.174586719 | 0.226098 | -5.19503  | 2.05E-07 | 9.49E-07 |
| 14703 | C10orf53  | 0.512164698 | -1.175222007 | 1.07112  | -1.09719  | 0.272558 | 0.363355 |
| 6075  | HRCT1     | 89.49368707 | -1.17527017  | 0.277738 | -4.231576 | 2.32E-05 | 7.49E-05 |
| 3280  | NHG3-RCC  | 188.8195112 | -1.175373708 | 0.201593 | -5.830443 | 5.53E-09 | 3.30E-08 |
| 4872  | SCML4     | 39.83723739 | -1.175406081 | 0.242376 | -4.84951  | 1.24E-06 | 4.98E-06 |
| 6564  | FPR2      | 32.04817628 | -1.175878956 | 0.293909 | -4.000822 | 6.31E-05 | 0.000188 |
| 5351  | CCR5      | 425.9021697 | -1.17592804  | 0.256033 | -4.592877 | 4.37E-06 | 1.60E-05 |
| 3304  | HIC1      | 201.4662162 | -1.17604389  | 0.202319 | -5.812828 | 6.14E-09 | 3.64E-08 |
| 1081  | TMEM173   | 990.0512571 | -1.176179423 | 0.143664 | -8.187008 | 2.68E-16 | 4.86E-15 |
| 3289  | KLHL6     | 299.4255023 | -1.17656891  | 0.202096 | -5.821842 | 5.82E-09 | 3.47E-08 |
| 13468 | C21orf99  | 0.486145475 | -1.176724409 | 0.786016 | -1.497074 | 0.134374 | 0.195565 |
| 6841  | HLA-DQA2  | 928.5602631 | -1.176867433 | 0.303026 | -3.883716 | 0.000103 | 0.000295 |
| 1469  | TICAM2    | 261.5833944 | -1.177013903 | 0.1546   | -7.613309 | 2.67E-14 | 3.56E-13 |
| 402   | VOPP1     | 1700.083374 | -1.177284275 | 0.117509 | -10.01865 | 1.26E-23 | 6.14E-22 |
| 3269  | SYNPO     | 9691.726336 | -1.177455619 | 0.201749 | -5.836237 | 5.34E-09 | 3.20E-08 |
| 4230  | NOL3      | 2190.377697 | -1.178026232 | 0.226829 | -5.193459 | 2.06E-07 | 9.57E-07 |
| 2264  | C6orf129  | 227.2415848 | -1.178784069 | 0.176289 | -6.686671 | 2.28E-11 | 1.98E-10 |
| 9781  | SLC4A3    | 135.7328978 | -1.178858637 | 0.433072 | -2.722083 | 0.006487 | 0.013    |
| 5238  | RFPL1S    | 8.984602871 | -1.178938395 | 0.253161 | -4.65688  | 3.21E-06 | 1.20E-05 |
| 3873  | HHIPL1    | 40.30918919 | -1.179066646 | 0.217503 | -5.420922 | 5.93E-08 | 3.00E-07 |
| 13427 | MS4A6E    | 0.345295458 | -1.179091169 | 0.782479 | -1.506867 | 0.131845 | 0.19247  |
| 448   | PHF19     | 355.5205669 | -1.179189773 | 0.120133 | -9.815731 | 9.63E-23 | 4.21E-21 |
| 11450 | FOXE3     | 0.481982154 | -1.179816116 | 0.552815 | -2.134197 | 0.032827 | 0.05619  |
| 733   | POLD4     | 1653.112698 | -1.18008549  | 0.132159 | -8.929262 | 4.29E-19 | 1.15E-17 |
| 1190  | RPL38     | 6853.476639 | -1.181323626 | 0.147152 | -8.027892 | 9.92E-16 | 1.63E-14 |
| 6752  | FAM155A   | 41.55112191 | -1.181703308 | 0.301571 | -3.918498 | 8.91E-05 | 0.000259 |
| 5528  | C6orf41   | 32.972776   | -1.181789023 | 0.262238 | -4.506546 | 6.59E-06 | 2.34E-05 |
| 6532  | EGFL8     | 104.5629906 | -1.182262123 | 0.294665 | -4.012222 | 6.01E-05 | 0.00018  |
| 5453  | ZBTB32    | 8.827712731 | -1.184247977 | 0.260784 | -4.541104 | 5.60E-06 | 2.01E-05 |
| 10023 | HIST1H3G  | 1.068842774 | -1.184413165 | 0.447883 | -2.644471 | 0.008182 | 0.016001 |
| 3390  | CCDC85B   | 369.6913072 | -1.184418925 | 0.205871 | -5.753195 | 8.76E-09 | 5.06E-08 |
| 2084  | C7orf47   | 237.6051845 | -1.185525062 | 0.172664 | -6.866072 | 6.60E-12 | 6.21E-11 |
| 9859  | LOC148824 | 1.891641245 | -1.185828404 | 0.439081 | -2.700706 | 0.006919 | 0.013756 |
| 2758  | GMFG      | 753.6262915 | -1.18597221  | 0.190256 | -6.233559 | 4.56E-10 | 3.24E-09 |
| 1035  | TRPV2     | 462.2480897 | -1.186305945 | 0.143306 | -8.278104 | 1.25E-16 | 2.37E-15 |
| 4613  | PIWIL2    | 5.849005594 | -1.186573076 | 0.238122 | -4.983046 | 6.26E-07 | 2.66E-06 |
| 12621 | UNC93A    | 31.51785596 | -1.186748706 | 0.671885 | -1.766297 | 0.077346 | 0.120129 |
| 6432  | ATAD3C    | 140.6672195 | -1.186832196 | 0.292506 | -4.05746  | 4.96E-05 | 0.000151 |
| 2858  | RNASE6    | 499.7514367 | -1.187588445 | 0.193503 | -6.137316 | 8.39E-10 | 5.76E-09 |
| 2628  | P4HA2     | 2829.48643  | -1.188057301 | 0.187018 | -6.352643 | 2.12E-10 | 1.58E-09 |
| 5716  | P2RX1     | 37.13883795 | -1.188829516 | 0.269455 | -4.411972 | 1.02E-05 | 3.51E-05 |
| 7741  | NCCRP1    | 9.352541138 | -1.188913368 | 0.337447 | -3.523261 | 0.000426 | 0.001079 |

|       |           |             |              |          |           |          |          |
|-------|-----------|-------------|--------------|----------|-----------|----------|----------|
| 1691  | SLC1A5    | 1893.802374 | -1.189684641 | 0.162866 | -7.304678 | 2.78E-13 | 3.22E-12 |
| 5729  | C5orf20   | 14.50858484 | -1.189849718 | 0.269937 | -4.407882 | 1.04E-05 | 3.57E-05 |
| 1663  | TEAD4     | 438.889226  | -1.190228638 | 0.162093 | -7.342862 | 2.09E-13 | 2.46E-12 |
| 679   | ANXA2P2   | 3434.233291 | -1.190467436 | 0.131307 | -9.066263 | 1.23E-19 | 3.56E-18 |
| 13703 | CEACAM2   | 0.285165369 | -1.190699931 | 0.84023  | -1.417112 | 0.15645  | 0.223789 |
| 586   | PPIB      | 10989.13691 | -1.190738802 | 0.127209 | -9.360512 | 7.94E-21 | 2.65E-19 |
| 14414 | MAGEA10   | 0.306863693 | -1.191208466 | 0.997629 | -1.194039 | 0.232463 | 0.316116 |
| 4838  | DAPK2     | 142.3312801 | -1.191224435 | 0.244595 | -4.870197 | 1.11E-06 | 4.52E-06 |
| 484   | C19orf10  | 2291.475274 | -1.191537088 | 0.123174 | -9.673636 | 3.90E-22 | 1.58E-20 |
| 10394 | HORMAD1   | 1.107056564 | -1.191592453 | 0.474841 | -2.509455 | 0.012092 | 0.022803 |
| 5336  | ODF3L1    | 11.60488565 | -1.192307231 | 0.258987 | -4.603735 | 4.15E-06 | 1.52E-05 |
| 4130  | SLC16A3   | 6333.518743 | -1.192587872 | 0.226611 | -5.262713 | 1.42E-07 | 6.74E-07 |
| 2896  | RPL22L1   | 638.1292329 | -1.193019715 | 0.195116 | -6.114405 | 9.69E-10 | 6.56E-09 |
| 11806 | IFNB1     | 0.311197071 | -1.193645781 | 0.591138 | -2.019234 | 0.043463 | 0.07216  |
| 4861  | SRPX      | 129.7111406 | -1.193714125 | 0.245818 | -4.85608  | 1.20E-06 | 4.83E-06 |
| 2526  | HRH1      | 385.1671185 | -1.193825275 | 0.185287 | -6.443104 | 1.17E-10 | 9.08E-10 |
| 11695 | ST8SIA2   | 6.349278366 | -1.194074364 | 0.581749 | -2.052561 | 0.040115 | 0.067234 |
| 8932  | KNDC1     | 190.8237277 | -1.194331061 | 0.392791 | -3.04063  | 0.002361 | 0.005181 |
| 14853 | CGB       | 0.329893583 | -1.194606983 | 1.136165 | -1.051438 | 0.293058 | 0.386738 |
| 4486  | SOCS3     | 3295.369212 | -1.194808855 | 0.236702 | -5.047733 | 4.47E-07 | 1.95E-06 |
| 1266  | RPLP2     | 11049.03837 | -1.194920002 | 0.151123 | -7.90694  | 2.64E-15 | 4.08E-14 |
| 5815  | AIFM3     | 22.48330515 | -1.195767168 | 0.27387  | -4.366189 | 1.26E-05 | 4.26E-05 |
| 2384  | NME2P1    | 88.4057308  | -1.196044959 | 0.181923 | -6.574456 | 4.88E-11 | 4.02E-10 |
| 3436  | ICAM1     | 4289.36361  | -1.196046027 | 0.209086 | -5.720363 | 1.06E-08 | 6.06E-08 |
| 1095  | TOP1MT    | 504.7717809 | -1.19672719  | 0.146525 | -8.167412 | 3.15E-16 | 5.64E-15 |
| 6382  | NRN1      | 508.6400934 | -1.197008291 | 0.292953 | -4.086005 | 4.39E-05 | 0.000135 |
| 4161  | ADRA1B    | 226.4921385 | -1.197539    | 0.228418 | -5.242759 | 1.58E-07 | 7.45E-07 |
| 7469  | PIP5KL1   | 6.151458135 | -1.197782363 | 0.330115 | -3.628381 | 0.000285 | 0.000748 |
| 5485  | MS4A14    | 99.09753397 | -1.197866045 | 0.264501 | -4.528782 | 5.93E-06 | 2.12E-05 |
| 939   | DOK1      | 340.0168545 | -1.199129986 | 0.141639 | -8.466079 | 2.54E-17 | 5.30E-16 |
| 14701 | DSPP      | 0.249036118 | -1.19917246  | 1.091769 | -1.098376 | 0.272041 | 0.362715 |
| 3633  | CCNE1     | 44.57558387 | -1.199429146 | 0.214876 | -5.581962 | 2.38E-08 | 1.28E-07 |
| 4143  | MAPK11    | 394.803147  | -1.199792125 | 0.228308 | -5.25515  | 1.48E-07 | 7.00E-07 |
| 5153  | ARNTL2    | 53.96565715 | -1.199836235 | 0.255224 | -4.701106 | 2.59E-06 | 9.84E-06 |
| 10917 | PAPL      | 0.702707145 | -1.200224741 | 0.518844 | -2.313267 | 0.020708 | 0.03718  |
| 7129  | PSD2      | 23.76847909 | -1.200232995 | 0.318028 | -3.773983 | 0.000161 | 0.000442 |
| 2006  | RPL37A    | 14990.07963 | -1.200795134 | 0.172755 | -6.950862 | 3.63E-12 | 3.55E-11 |
| 13874 | GAD2      | 0.542037472 | -1.200960508 | 0.883157 | -1.359849 | 0.173878 | 0.245635 |
| 8241  | TRNP1     | 150.749229  | -1.201081672 | 0.362311 | -3.315055 | 0.000916 | 0.002179 |
| 7297  | RMRP      | 38.90802044 | -1.202646647 | 0.324992 | -3.700547 | 0.000215 | 0.000578 |
| 5889  | PTGER2    | 167.9065223 | -1.202831488 | 0.278041 | -4.3261   | 1.52E-05 | 5.05E-05 |
| 3590  | ITGAL     | 786.9191709 | -1.203151872 | 0.214493 | -5.609279 | 2.03E-08 | 1.11E-07 |
| 16236 | DIRC1     | 0.228091211 | -1.203715243 | 1.866358 | -0.644954 | 0.518957 | 0.626514 |
| 3674  | LOC283663 | 35.08720506 | -1.204253579 | 0.216829 | -5.553923 | 2.79E-08 | 1.49E-07 |
| 2703  | STX1A     | 51.78248624 | -1.205818722 | 0.192052 | -6.278611 | 3.42E-10 | 2.48E-09 |
| 709   | RNASEH2A  | 315.4112735 | -1.207349284 | 0.13434  | -8.98729  | 2.53E-19 | 7.01E-18 |
| 2723  | PLXDC1    | 1052.826705 | -1.207545367 | 0.192846 | -6.261716 | 3.81E-10 | 2.74E-09 |

|       |           |             |              |          |           |          |          |
|-------|-----------|-------------|--------------|----------|-----------|----------|----------|
| 1426  | HIVEP3    | 183.1417729 | -1.208054309 | 0.157429 | -7.67365  | 1.67E-14 | 2.30E-13 |
| 12280 | KRT4      | 1.32912807  | -1.208212545 | 0.645324 | -1.872257 | 0.061171 | 0.09764  |
| 4982  | NCR3      | 14.33288641 | -1.208698065 | 0.252716 | -4.782824 | 1.73E-06 | 6.80E-06 |
| 1970  | HMHA1     | 887.7247126 | -1.209884389 | 0.172795 | -7.00183  | 2.53E-12 | 2.51E-11 |
| 1672  | FAM78A    | 290.3672001 | -1.21006325  | 0.165026 | -7.332556 | 2.26E-13 | 2.65E-12 |
| 14896 | SLC7A3    | 0.256101527 | -1.210224811 | 1.166567 | -1.037425 | 0.299538 | 0.394123 |
| 6055  | TNXB      | 489.165473  | -1.210313244 | 0.285334 | -4.241745 | 2.22E-05 | 7.18E-05 |
| 4696  | CDKN2BAS  | 8.717885809 | -1.211997252 | 0.245756 | -4.931711 | 8.15E-07 | 3.40E-06 |
| 12725 | HIST1H2AI | 0.314721016 | -1.212282714 | 0.702929 | -1.724617 | 0.084596 | 0.130308 |
| 8272  | DNASE2B   | 6.346684722 | -1.212927919 | 0.367115 | -3.303946 | 0.000953 | 0.002259 |
| 1494  | IFITM3    | 12538.78789 | -1.214540513 | 0.160308 | -7.576316 | 3.56E-14 | 4.66E-13 |
| 6829  | LTK       | 13.96298346 | -1.214562963 | 0.312343 | -3.888554 | 0.000101 | 0.000289 |
| 8941  | LCTL      | 1.414926928 | -1.215280204 | 0.40042  | -3.035012 | 0.002405 | 0.005273 |
| 6429  | JPH3      | 4.842743597 | -1.215409861 | 0.299305 | -4.060769 | 4.89E-05 | 0.000149 |
| 5173  | TSPAN2    | 228.363954  | -1.215648668 | 0.259275 | -4.68864  | 2.75E-06 | 1.04E-05 |
| 5323  | ABCC3     | 3721.648844 | -1.216150023 | 0.263762 | -4.610791 | 4.01E-06 | 1.48E-05 |
| 6043  | CHST5     | 8.014505316 | -1.216652698 | 0.286409 | -4.247954 | 2.16E-05 | 7.00E-05 |
| 1224  | TMUB1     | 719.3943105 | -1.216672269 | 0.152327 | -7.987243 | 1.38E-15 | 2.21E-14 |
| 9615  | DNAH3     | 5.648509941 | -1.217201252 | 0.438726 | -2.7744   | 0.00553  | 0.011274 |
| 2165  | MGC72080  | 109.8116593 | -1.217389337 | 0.179114 | -6.796711 | 1.07E-11 | 9.69E-11 |
| 5542  | SYCE2     | 9.429879861 | -1.217443369 | 0.270465 | -4.501301 | 6.75E-06 | 2.39E-05 |
| 2146  | ARL11     | 67.82192147 | -1.217885839 | 0.178811 | -6.811006 | 9.69E-12 | 8.85E-11 |
| 14479 | PLA2G2F   | 0.293144353 | -1.218108536 | 1.037066 | -1.174572 | 0.240166 | 0.325126 |
| 1390  | GLIPR2    | 519.3953255 | -1.21846138  | 0.157688 | -7.727062 | 1.10E-14 | 1.55E-13 |
| 5074  | CRYGS     | 25.19107121 | -1.218709307 | 0.257392 | -4.734831 | 2.19E-06 | 8.47E-06 |
| 7239  | ATOH7     | 6.686937011 | -1.218757534 | 0.326844 | -3.728866 | 0.000192 | 0.000521 |
| 2836  | MRPL23    | 1041.6479   | -1.219381531 | 0.198059 | -6.156664 | 7.43E-10 | 5.13E-09 |
| 3731  | LPCAT1    | 7221.50216  | -1.220170188 | 0.221112 | -5.518331 | 3.42E-08 | 1.80E-07 |
| 4210  | GPR39     | 192.0742274 | -1.220212072 | 0.234519 | -5.203052 | 1.96E-07 | 9.13E-07 |
| 10026 | PCSK1N    | 201.0747302 | -1.220829346 | 0.461919 | -2.642948 | 0.008219 | 0.016068 |
| 14678 | C9orf57   | 0.295209386 | -1.220915529 | 1.101242 | -1.108671 | 0.267572 | 0.357316 |
| 6026  | FBXO41    | 226.7246727 | -1.221269864 | 0.287081 | -4.254101 | 2.10E-05 | 6.83E-05 |
| 5338  | LOC349196 | 9.51664001  | -1.222585932 | 0.265637 | -4.602461 | 4.18E-06 | 1.53E-05 |
| 1673  | LSM7      | 431.2079388 | -1.222793836 | 0.166763 | -7.332507 | 2.26E-13 | 2.65E-12 |
| 5089  | C20orf46  | 134.1898265 | -1.222863195 | 0.258545 | -4.729793 | 2.25E-06 | 8.65E-06 |
| 3828  | PFKFB4    | 645.4146155 | -1.223511311 | 0.224525 | -5.44934  | 5.06E-08 | 2.59E-07 |
| 1180  | LOC728855 | 228.4618041 | -1.224407669 | 0.152082 | -8.050983 | 8.21E-16 | 1.36E-14 |
| 4977  | CD2       | 466.3156402 | -1.224473114 | 0.255906 | -4.784853 | 1.71E-06 | 6.74E-06 |
| 6197  | NUPR1     | 5157.550295 | -1.225247443 | 0.293348 | -4.176774 | 2.96E-05 | 9.35E-05 |
| 14539 | DYDC1     | 0.6295847   | -1.22551927  | 1.062323 | -1.153623 | 0.248655 | 0.335228 |
| 7044  | CA3       | 28.7352484  | -1.225541058 | 0.322248 | -3.803096 | 0.000143 | 0.000398 |
| 4680  | SLC1A3    | 505.71662   | -1.22564388  | 0.248072 | -4.940672 | 7.79E-07 | 3.26E-06 |
| 3419  | C1orf113  | 265.6125985 | -1.225646602 | 0.213851 | -5.73131  | 9.97E-09 | 5.71E-08 |
| 2719  | RPL35     | 8457.018914 | -1.22588892  | 0.195676 | -6.264877 | 3.73E-10 | 2.69E-09 |
| 2337  | C20orf199 | 2370.895093 | -1.226036608 | 0.185243 | -6.618522 | 3.63E-11 | 3.04E-10 |
| 2189  | LMNB1     | 431.9764375 | -1.226677555 | 0.181176 | -6.770648 | 1.28E-11 | 1.15E-10 |
| 2313  | GIN52     | 150.7290654 | -1.226723033 | 0.18466  | -6.643138 | 3.07E-11 | 2.60E-10 |



|       |           |             |              |          |           |          |          |
|-------|-----------|-------------|--------------|----------|-----------|----------|----------|
| 12425 | POPDC3    | 3.813434657 | -1.227502983 | 0.671061 | -1.829197 | 0.06737  | 0.10628  |
| 5438  | FAM179A   | 9.718476991 | -1.227617677 | 0.269886 | -4.548661 | 5.40E-06 | 1.95E-05 |
| 2969  | CHTF18    | 158.6326087 | -1.228252428 | 0.202804 | -6.05636  | 1.39E-09 | 9.19E-09 |
| 1119  | C21orf122 | 33.09076057 | -1.228431833 | 0.151076 | -8.131218 | 4.25E-16 | 7.44E-15 |
| 2356  | NLRC4     | 91.37902693 | -1.228802898 | 0.186143 | -6.601405 | 4.07E-11 | 3.39E-10 |
| 14080 | SLC27A6   | 0.480175514 | -1.229195538 | 0.950035 | -1.293842 | 0.19572  | 0.272465 |
| 7905  | RASL11B   | 34.18582434 | -1.231261377 | 0.357318 | -3.445838 | 0.000569 | 0.001412 |
| 1561  | SSR4      | 3409.19013  | -1.231582674 | 0.164707 | -7.477435 | 7.58E-14 | 9.52E-13 |
| 1859  | TSPO      | 1587.483651 | -1.231769454 | 0.172815 | -7.127686 | 1.02E-12 | 1.08E-11 |
| 6255  | SLC7A7    | 2455.107303 | -1.231878594 | 0.296655 | -4.152558 | 3.29E-05 | 0.000103 |
| 10925 | RGS22     | 7.75642944  | -1.232193831 | 0.533193 | -2.31097  | 0.020835 | 0.03738  |
| 1366  | PLEC      | 8066.210984 | -1.232590467 | 0.158638 | -7.76983  | 7.86E-15 | 1.13E-13 |
| 9237  | ABRA      | 2.416389764 | -1.232716902 | 0.4216   | -2.923898 | 0.003457 | 0.007335 |
| 13801 | OR1Q1     | 0.342113262 | -1.232825339 | 0.888948 | -1.386836 | 0.165492 | 0.235063 |
| 5014  | TREML2    | 6.653813252 | -1.233119644 | 0.25879  | -4.764936 | 1.89E-06 | 7.39E-06 |
| 1331  | THBS3     | 690.3616004 | -1.233162574 | 0.157627 | -7.823291 | 5.15E-15 | 7.58E-14 |
| 4553  | CCL3      | 171.6609578 | -1.233991203 | 0.246408 | -5.007912 | 5.50E-07 | 2.37E-06 |
| 1589  | FLT3LG    | 126.7693444 | -1.234731986 | 0.166001 | -7.438094 | 1.02E-13 | 1.26E-12 |
| 5813  | MGAT5B    | 14.05802243 | -1.234810833 | 0.282725 | -4.367539 | 1.26E-05 | 4.24E-05 |
| 3231  | KIF4B     | 4.650431414 | -1.234957133 | 0.210565 | -5.864981 | 4.49E-09 | 2.73E-08 |
| 7851  | SLC24A3   | 112.3353164 | -1.235193243 | 0.3558   | -3.471595 | 0.000517 | 0.001292 |
| 4264  | MSR1      | 1555.767165 | -1.235763658 | 0.238828 | -5.17429  | 2.29E-07 | 1.05E-06 |
| 14878 | C14orf48  | 0.3070873   | -1.235795524 | 1.184639 | -1.043183 | 0.296864 | 0.391073 |
| 2524  | CSF2RA    | 250.6334904 | -1.235797687 | 0.191774 | -6.444045 | 1.16E-10 | 9.03E-10 |
| 3520  | CDK1      | 254.1562649 | -1.235918698 | 0.218456 | -5.657527 | 1.54E-08 | 8.55E-08 |
| 2785  | C1orf86   | 467.8438674 | -1.236029102 | 0.199109 | -6.207795 | 5.37E-10 | 3.78E-09 |
| 1028  | RHBDF2    | 1204.93618  | -1.236360716 | 0.149142 | -8.289827 | 1.13E-16 | 2.16E-15 |
| 2105  | GNGT2     | 53.75395208 | -1.236457192 | 0.180653 | -6.844368 | 7.68E-12 | 7.15E-11 |
| 5322  | SERPINE2  | 4704.121953 | -1.236552295 | 0.268164 | -4.611175 | 4.00E-06 | 1.47E-05 |
| 1431  | RPLP1     | 22857.2444  | -1.236776924 | 0.161423 | -7.661711 | 1.83E-14 | 2.51E-13 |
| 14557 | DEFA4     | 0.660596238 | -1.236816971 | 1.076974 | -1.148419 | 0.250796 | 0.337696 |
| 12357 | CAPN9     | 1.195376335 | -1.236919639 | 0.66927  | -1.848163 | 0.064579 | 0.102437 |
| 8167  | CACNA1I   | 8.05707887  | -1.237190109 | 0.369711 | -3.346375 | 0.000819 | 0.001965 |
| 2561  | FAM128B   | 1578.376169 | -1.237618708 | 0.192912 | -6.415473 | 1.40E-10 | 1.07E-09 |
| 3993  | GPA33     | 4.550254138 | -1.237652339 | 0.23158  | -5.344388 | 9.07E-08 | 4.45E-07 |
| 3358  | FAM72D    | 24.551703   | -1.239123057 | 0.21463  | -5.773291 | 7.77E-09 | 4.54E-08 |
| 1765  | SIL1      | 1475.951419 | -1.239167668 | 0.171485 | -7.226115 | 4.97E-13 | 5.52E-12 |
| 6758  | 43894     | 30.07868363 | -1.239669211 | 0.316544 | -3.916263 | 8.99E-05 | 0.000261 |
| 4179  | HSPB2     | 446.6996038 | -1.239777296 | 0.237138 | -5.22808  | 1.71E-07 | 8.03E-07 |
| 13581 | FOXE1     | 5.272153181 | -1.240389198 | 0.849047 | -1.460919 | 0.144038 | 0.207885 |
| 3233  | BMP8A     | 184.3051184 | -1.240825202 | 0.211615 | -5.863605 | 4.53E-09 | 2.75E-08 |
| 11333 | ARID3C    | 0.924520615 | -1.241571991 | 0.572123 | -2.170113 | 0.029998 | 0.051884 |
| 2364  | PROCR     | 923.3551009 | -1.241649326 | 0.188295 | -6.594174 | 4.28E-11 | 3.55E-10 |
| 7014  | MPP2      | 43.96118301 | -1.241712905 | 0.325252 | -3.817689 | 0.000135 | 0.000376 |
| 1378  | NME1      | 1245.291235 | -1.243042064 | 0.160252 | -7.756815 | 8.71E-15 | 1.24E-13 |
| 6869  | LOC399815 | 3.80083563  | -1.243631367 | 0.320856 | -3.87598  | 0.000106 | 0.000303 |
| 3979  | LRRC8E    | 151.9285416 | -1.24370049  | 0.232296 | -5.353953 | 8.61E-08 | 4.24E-07 |

|       |           |             |              |          |           |          |          |
|-------|-----------|-------------|--------------|----------|-----------|----------|----------|
| 7200  | SLC26A8   | 1.594365343 | -1.243869387 | 0.332061 | -3.745908 | 0.00018  | 0.000489 |
| 6737  | KIAA0087  | 9.480697944 | -1.244917241 | 0.317099 | -3.925962 | 8.64E-05 | 0.000251 |
| 15730 | OR1E1     | 0.281302798 | -1.244977226 | 1.565758 | -0.795127 | 0.426539 | 0.531507 |
| 6685  | GPR120    | 10.75401732 | -1.24535027  | 0.315518 | -3.947006 | 7.91E-05 | 0.000232 |
| 13892 | C7orf33   | 0.281213972 | -1.245538637 | 0.921802 | -1.3512   | 0.176631 | 0.249219 |
| 7561  | AICDA     | 14.10851263 | -1.245773388 | 0.346816 | -3.592031 | 0.000328 | 0.000851 |
| 5596  | ODF3B     | 294.3502352 | -1.245853641 | 0.278488 | -4.473633 | 7.69E-06 | 2.69E-05 |
| 2344  | NPM3      | 228.2453807 | -1.246986791 | 0.18861  | -6.611459 | 3.81E-11 | 3.18E-10 |
| 5360  | DC1001889 | 13.09878173 | -1.247492301 | 0.271981 | -4.586694 | 4.50E-06 | 1.65E-05 |
| 1244  | GNB1L     | 79.47308198 | -1.247503165 | 0.157187 | -7.936425 | 2.08E-15 | 3.28E-14 |
| 5476  | SEZ6L2    | 1958.503389 | -1.248273677 | 0.275399 | -4.532595 | 5.83E-06 | 2.09E-05 |
| 10270 | WNK2      | 43.77425099 | -1.248652211 | 0.488259 | -2.557356 | 0.010547 | 0.02013  |
| 5824  | ICAM4     | 17.15010721 | -1.249242357 | 0.286437 | -4.361312 | 1.29E-05 | 4.35E-05 |
| 4455  | DC1002722 | 29.80366852 | -1.250403511 | 0.246644 | -5.069675 | 3.98E-07 | 1.75E-06 |
| 8416  | PTGES     | 330.5466691 | -1.250521309 | 0.38555  | -3.243474 | 0.001181 | 0.00275  |
| 8806  | SCN3A     | 26.99918975 | -1.250886017 | 0.405507 | -3.084743 | 0.002037 | 0.004535 |
| 2992  | C20orf134 | 27.37369132 | -1.25095189  | 0.207018 | -6.042728 | 1.52E-09 | 9.93E-09 |
| 3019  | CACNB1    | 89.17491027 | -1.251090444 | 0.207807 | -6.020447 | 1.74E-09 | 1.13E-08 |
| 6313  | KIF26B    | 94.03493593 | -1.251508313 | 0.303835 | -4.119037 | 3.80E-05 | 0.000118 |
| 1484  | C19orf40  | 30.65471107 | -1.253863587 | 0.165103 | -7.594427 | 3.09E-14 | 4.08E-13 |
| 13917 | LOC727677 | 0.301574172 | -1.255381243 | 0.933305 | -1.345093 | 0.178595 | 0.251537 |
| 3996  | SPC25     | 42.35337443 | -1.255609864 | 0.234983 | -5.343402 | 9.12E-08 | 4.47E-07 |
| 4381  | PFN4      | 7.654078671 | -1.255736307 | 0.245547 | -5.114046 | 3.15E-07 | 1.41E-06 |
| 10762 | C3orf65   | 0.505171712 | -1.256361949 | 0.528321 | -2.378026 | 0.017406 | 0.031701 |
| 4399  | TWIST1    | 23.20373171 | -1.256478559 | 0.246156 | -5.10441  | 3.32E-07 | 1.48E-06 |
| 6643  | RHD       | 5.866193044 | -1.256534895 | 0.316782 | -3.96656  | 7.29E-05 | 0.000215 |
| 3748  | DTX1      | 72.40789092 | -1.257144937 | 0.228284 | -5.506944 | 3.65E-08 | 1.91E-07 |
| 7554  | C20orf203 | 2.481047842 | -1.257710072 | 0.349952 | -3.593954 | 0.000326 | 0.000845 |
| 4995  | CYP4F22   | 3.60839391  | -1.258031679 | 0.263396 | -4.776207 | 1.79E-06 | 7.01E-06 |
| 8386  | PRSS50    | 13.77579335 | -1.258301166 | 0.386291 | -3.25739  | 0.001124 | 0.002628 |
| 2181  | CDK2AP2   | 2418.353466 | -1.258572964 | 0.185746 | -6.775759 | 1.24E-11 | 1.11E-10 |
| 16124 | MAGEA9B   | 0.217075871 | -1.25929565  | 1.867156 | -0.674446 | 0.500028 | 0.607817 |
| 13645 | ACTL8     | 1.357125251 | -1.259410794 | 0.874536 | -1.44009  | 0.149842 | 0.215248 |
| 4196  | IGSF21    | 65.9187422  | -1.260614012 | 0.241846 | -5.212471 | 1.86E-07 | 8.70E-07 |
| 3346  | SDF2L1    | 517.3247027 | -1.260766449 | 0.217918 | -5.785509 | 7.23E-09 | 4.23E-08 |
| 16130 | IL1F5     | 0.219930813 | -1.261422319 | 1.875656 | -0.672523 | 0.501251 | 0.609114 |
| 2230  | TFAP2E    | 9.204746635 | -1.261549267 | 0.187711 | -6.720688 | 1.81E-11 | 1.59E-10 |
| 1430  | G6GALNA6  | 395.5071975 | -1.262663105 | 0.164765 | -7.663425 | 1.81E-14 | 2.48E-13 |
| 2739  | UCP2      | 2124.18781  | -1.262683596 | 0.202118 | -6.247265 | 4.18E-10 | 2.99E-09 |
| 6335  | C19orf51  | 31.90596018 | -1.262718857 | 0.307195 | -4.110475 | 3.95E-05 | 0.000122 |
| 1382  | PRC1      | 336.3975347 | -1.26395753  | 0.163179 | -7.745828 | 9.50E-15 | 1.35E-13 |
| 3447  | RHOH      | 134.9010828 | -1.264460027 | 0.221473 | -5.709319 | 1.13E-08 | 6.45E-08 |
| 7286  | DUSP5P    | 33.26152538 | -1.264825798 | 0.341329 | -3.705595 | 0.000211 | 0.000567 |
| 4508  | GATA6     | 127.7253032 | -1.265201175 | 0.251539 | -5.029843 | 4.91E-07 | 2.13E-06 |
| 5177  | CHRD      | 344.0702881 | -1.266265141 | 0.27025  | -4.685533 | 2.79E-06 | 1.06E-05 |
| 7972  | SCG5      | 113.4371566 | -1.266814548 | 0.370323 | -3.420837 | 0.000624 | 0.001535 |
| 677   | IL18BP    | 746.9721928 | -1.267151867 | 0.139559 | -9.079714 | 1.09E-19 | 3.15E-18 |

|       |           |             |              |          |           |          |          |
|-------|-----------|-------------|--------------|----------|-----------|----------|----------|
| 5732  | PHYHIP    | 27.138907   | -1.267322401 | 0.287578 | -4.406882 | 1.05E-05 | 3.59E-05 |
| 2850  | CDCA7L    | 592.600687  | -1.267730948 | 0.206345 | -6.143731 | 8.06E-10 | 5.54E-09 |
| 7148  | CYP2B7P1  | 5.122536557 | -1.268411728 | 0.336887 | -3.765095 | 0.000166 | 0.000457 |
| 1871  | C17orf96  | 82.29561659 | -1.268778614 | 0.178218 | -7.119234 | 1.09E-12 | 1.14E-11 |
| 13761 | C19orf75  | 0.462750866 | -1.269157931 | 0.906832 | -1.399551 | 0.161648 | 0.230249 |
| 4911  | XKRX      | 4.388117102 | -1.269345765 | 0.26327  | -4.82146  | 1.43E-06 | 5.69E-06 |
| 9643  | TFR2      | 71.74276049 | -1.269561902 | 0.459066 | -2.765531 | 0.005683 | 0.011552 |
| 3344  | PRDM6     | 20.25144642 | -1.269801743 | 0.219321 | -5.7897   | 7.05E-09 | 4.13E-08 |
| 2324  | SELL      | 288.4935785 | -1.269971164 | 0.1914   | -6.635166 | 3.24E-11 | 2.73E-10 |
| 3322  | GPRIN1    | 161.1853176 | -1.270910218 | 0.219065 | -5.801521 | 6.57E-09 | 3.88E-08 |
| 83    | TUBA1B    | 17259.36167 | -1.271202462 | 0.101271 | -12.55251 | 3.85E-36 | 9.09E-34 |
| 2651  | C19orf38  | 46.20840436 | -1.271871044 | 0.201131 | -6.323593 | 2.56E-10 | 1.89E-09 |
| 2574  | BLM       | 53.4355315  | -1.271913303 | 0.198477 | -6.40838  | 1.47E-10 | 1.12E-09 |
| 4190  | SAMSN1    | 308.9031293 | -1.271915185 | 0.243882 | -5.215284 | 1.84E-07 | 8.59E-07 |
| 1092  | MIIIP     | 240.5345054 | -1.272737386 | 0.155747 | -8.171813 | 3.04E-16 | 5.45E-15 |
| 15170 | LOC284688 | 0.288354105 | -1.273201229 | 1.331067 | -0.956527 | 0.338806 | 0.437795 |
| 10514 | DUSP9     | 41.14530831 | -1.273382973 | 0.516237 | -2.466662 | 0.013638 | 0.025425 |
| 1336  | NAV1      | 1076.386542 | -1.273496748 | 0.163    | -7.812847 | 5.59E-15 | 8.20E-14 |
| 1252  | CIB1      | 3064.317251 | -1.273575028 | 0.160585 | -7.930842 | 2.18E-15 | 3.41E-14 |
| 5493  | SIT1      | 82.63229967 | -1.273938297 | 0.281559 | -4.524582 | 6.05E-06 | 2.16E-05 |
| 11366 | WBSCR28   | 1.152821556 | -1.274006082 | 0.589109 | -2.162598 | 0.030572 | 0.052725 |
| 5051  | CYBB      | 2127.367036 | -1.274189068 | 0.268495 | -4.745663 | 2.08E-06 | 8.06E-06 |
| 1463  | LAT2      | 311.5174561 | -1.274241847 | 0.167167 | -7.622551 | 2.49E-14 | 3.33E-13 |
| 1324  | CD74      | 87964.9048  | -1.274863986 | 0.162777 | -7.831969 | 4.80E-15 | 7.11E-14 |
| 13403 | FAM74A3   | 0.888586873 | -1.275582554 | 0.843882 | -1.511565 | 0.130645 | 0.191059 |
| 16090 | SPANXB2   | 0.282488288 | -1.275723449 | 1.863014 | -0.684763 | 0.493493 | 0.601179 |
| 2082  | UBE2T     | 79.37300871 | -1.275910744 | 0.18576  | -6.868612 | 6.48E-12 | 6.10E-11 |
| 9039  | MOBP      | 1.028109778 | -1.275963482 | 0.425446 | -2.999117 | 0.002708 | 0.005871 |
| 4235  | LGI2      | 89.84195458 | -1.276212201 | 0.245928 | -5.18937  | 2.11E-07 | 9.77E-07 |
| 6801  | FSD1      | 4.338328449 | -1.276385307 | 0.327277 | -3.90002  | 9.62E-05 | 0.000277 |
| 1493  | POC1A     | 60.08549063 | -1.276869659 | 0.168431 | -7.580964 | 3.43E-14 | 4.50E-13 |
| 3975  | LCK       | 283.8101964 | -1.27689792  | 0.238422 | -5.355613 | 8.53E-08 | 4.20E-07 |
| 2298  | AXL       | 2782.627805 | -1.276919486 | 0.191801 | -6.657518 | 2.78E-11 | 2.38E-10 |
| 10585 | RTP1      | 0.485942095 | -1.277020532 | 0.523311 | -2.440271 | 0.014676 | 0.027177 |
| 6601  | FAM131C   | 214.6922977 | -1.277618568 | 0.320715 | -3.983651 | 6.79E-05 | 0.000202 |
| 6047  | NXPH4     | 484.1335194 | -1.277632888 | 0.301067 | -4.24368  | 2.20E-05 | 7.13E-05 |
| 1155  | C1orf54   | 270.9772969 | -1.2782569   | 0.158178 | -8.081154 | 6.42E-16 | 1.09E-14 |
| 308   | CKAP4     | 2313.947345 | -1.278646898 | 0.121773 | -10.50027 | 8.61E-26 | 5.48E-24 |
| 1270  | PSMG3     | 582.6031172 | -1.278984162 | 0.161896 | -7.900017 | 2.79E-15 | 4.30E-14 |
| 8943  | VWCE      | 317.1387229 | -1.279054036 | 0.421448 | -3.034901 | 0.002406 | 0.005274 |
| 732   | ACTN1     | 4091.775979 | -1.279108114 | 0.143134 | -8.936452 | 4.02E-19 | 1.08E-17 |
| 6934  | ST6GAL2   | 55.56621507 | -1.279765455 | 0.332466 | -3.849313 | 0.000118 | 0.000335 |
| 2042  | RAPGEFL1  | 109.7358113 | -1.281538625 | 0.185195 | -6.919938 | 4.52E-12 | 4.34E-11 |
| 617   | RPLP0     | 27227.23621 | -1.281998079 | 0.138465 | -9.258669 | 2.07E-20 | 6.58E-19 |
| 5361  | RASL10A   | 11.70942602 | -1.283425638 | 0.279888 | -4.58549  | 4.53E-06 | 1.66E-05 |
| 2249  | ACRBP     | 67.54926346 | -1.283448736 | 0.191644 | -6.697062 | 2.13E-11 | 1.85E-10 |
| 7470  | LINGO3    | 3.211899578 | -1.283819585 | 0.353888 | -3.627759 | 0.000286 | 0.00075  |

|       |           |             |              |          |           |          |          |
|-------|-----------|-------------|--------------|----------|-----------|----------|----------|
| 14971 | PNLIPRP2  | 0.288216078 | -1.284110071 | 1.264448 | -1.01555  | 0.309844 | 0.405667 |
| 6994  | GPR37L1   | 5.33390341  | -1.284177713 | 0.335635 | -3.826119 | 0.00013  | 0.000365 |
| 1406  | GALNT6    | 130.6391417 | -1.285269358 | 0.167007 | -7.695908 | 1.40E-14 | 1.96E-13 |
| 11179 | C3orf72   | 0.620427629 | -1.285888635 | 0.576814 | -2.229296 | 0.025794 | 0.045223 |
| 7084  | TPSB2     | 350.3187953 | -1.285917411 | 0.339226 | -3.790742 | 0.00015  | 0.000416 |
| 6149  | MUSTN1    | 66.72278484 | -1.286891716 | 0.306177 | -4.203096 | 2.63E-05 | 8.39E-05 |
| 4957  | PLEKHN1   | 43.56891386 | -1.287253893 | 0.268567 | -4.793051 | 1.64E-06 | 6.49E-06 |
| 1980  | FAM83D    | 113.4823073 | -1.287789659 | 0.184228 | -6.990199 | 2.74E-12 | 2.72E-11 |
| 9677  | NPB       | 6.113669587 | -1.287864537 | 0.467534 | -2.754593 | 0.005877 | 0.011903 |
| 2878  | ADD45GIF  | 1209.934334 | -1.288417494 | 0.210366 | -6.12465  | 9.09E-10 | 6.19E-09 |
| 6042  | C15orf48  | 165.8796633 | -1.288698392 | 0.303369 | -4.247964 | 2.16E-05 | 7.00E-05 |
| 5130  | FOXL1     | 121.6025854 | -1.289107197 | 0.273471 | -4.713864 | 2.43E-06 | 9.29E-06 |
| 6003  | C6orf122  | 13.01204993 | -1.289737661 | 0.3024   | -4.265006 | 2.00E-05 | 6.53E-05 |
| 5066  | HOXC11    | 33.51538269 | -1.289914049 | 0.272198 | -4.738888 | 2.15E-06 | 8.31E-06 |
| 603   | RELT      | 213.0915282 | -1.289967853 | 0.138602 | -9.306996 | 1.31E-20 | 4.27E-19 |
| 866   | VKORC1    | 3384.374423 | -1.290649178 | 0.149903 | -8.609894 | 7.31E-18 | 1.66E-16 |
| 1726  | TRAIIP    | 38.79536627 | -1.291416808 | 0.177625 | -7.270488 | 3.58E-13 | 4.07E-12 |
| 719   | GAPDH     | 129486.2198 | -1.291509748 | 0.144001 | -8.968767 | 3.00E-19 | 8.17E-18 |
| 1435  | PSRC1     | 82.26731045 | -1.29176722  | 0.168842 | -7.650735 | 2.00E-14 | 2.73E-13 |
| 1701  | CXCR4     | 4867.800759 | -1.292161209 | 0.17717  | -7.293352 | 3.02E-13 | 3.48E-12 |
| 3840  | ENO2      | 4514.715771 | -1.292402516 | 0.23756  | -5.440328 | 5.32E-08 | 2.71E-07 |
| 3099  | FBF1      | 107.5859585 | -1.294034743 | 0.216955 | -5.964524 | 2.45E-09 | 1.55E-08 |
| 1625  | RPS15     | 5017.927321 | -1.29414106  | 0.175042 | -7.393336 | 1.43E-13 | 1.73E-12 |
| 6551  | ITGB6     | 464.2284704 | -1.294186873 | 0.32308  | -4.005775 | 6.18E-05 | 0.000185 |
| 2716  | FBN1      | 2483.378653 | -1.294730264 | 0.206632 | -6.265877 | 3.71E-10 | 2.67E-09 |
| 1217  | CST3      | 7343.195196 | -1.295203007 | 0.16195  | -7.997537 | 1.27E-15 | 2.04E-14 |
| 1948  | C8orf73   | 89.88889674 | -1.295804831 | 0.184139 | -7.037112 | 1.96E-12 | 1.97E-11 |
| 6379  | ODZ4      | 297.3069434 | -1.295845629 | 0.317095 | -4.086616 | 4.38E-05 | 0.000134 |
| 11996 | LCE5A     | 0.422474147 | -1.296464006 | 0.660743 | -1.962129 | 0.049747 | 0.081285 |
| 933   | TPM4      | 8323.725164 | -1.296642606 | 0.152994 | -8.475118 | 2.35E-17 | 4.93E-16 |
| 8370  | C2orf85   | 2.85791045  | -1.296772607 | 0.397438 | -3.262828 | 0.001103 | 0.002583 |
| 13462 | MRGPRE    | 1.634028374 | -1.297219693 | 0.865925 | -1.498075 | 0.134114 | 0.195273 |
| 4465  | GLT8D2    | 109.0751575 | -1.297260881 | 0.256367 | -5.06018  | 4.19E-07 | 1.84E-06 |
| 12907 | EVX1      | 0.813887027 | -1.297376061 | 0.776171 | -1.671507 | 0.094622 | 0.143691 |
| 12365 | DC1001895 | 0.557162111 | -1.297812724 | 0.702791 | -1.846655 | 0.064797 | 0.102716 |
| 6621  | AREG      | 103.9471431 | -1.29792019  | 0.326476 | -3.975551 | 7.02E-05 | 0.000208 |
| 2349  | FAM20C    | 2441.720361 | -1.29836675  | 0.196433 | -6.609723 | 3.85E-11 | 3.21E-10 |
| 2499  | ARHGAP9   | 253.5619039 | -1.298758929 | 0.200955 | -6.462949 | 1.03E-10 | 8.05E-10 |
| 924   | HCLS1     | 1494.232874 | -1.299223884 | 0.153129 | -8.484488 | 2.17E-17 | 4.60E-16 |
| 5576  | DSCR9     | 2.239168402 | -1.299893104 | 0.289767 | -4.485995 | 7.26E-06 | 2.55E-05 |
| 16500 | OR3A3     | 0.29362928  | -1.299959754 | 2.268911 | -0.572944 | 0.566682 | 0.673184 |
| 2135  | RPS21     | 6878.428037 | -1.300079182 | 0.190627 | -6.820033 | 9.10E-12 | 8.36E-11 |
| 6193  | C12orf69  | 23.90556398 | -1.301195458 | 0.311461 | -4.177717 | 2.94E-05 | 9.32E-05 |
| 14583 | SLC6A11   | 0.354520876 | -1.301371136 | 1.139808 | -1.141746 | 0.253559 | 0.340809 |
| 6159  | RAC3      | 62.26735182 | -1.301975307 | 0.310115 | -4.198366 | 2.69E-05 | 8.56E-05 |
| 175   | TAGLN2    | 11511.69587 | -1.303879751 | 0.113838 | -11.45386 | 2.25E-30 | 2.52E-28 |
| 1586  | NT5DC2    | 559.1457572 | -1.305179371 | 0.175431 | -7.439839 | 1.01E-13 | 1.25E-12 |

|       |          |             |              |          |           |          |          |
|-------|----------|-------------|--------------|----------|-----------|----------|----------|
| 1396  | DDX11    | 382.0075828 | -1.305239807 | 0.169025 | -7.722154 | 1.14E-14 | 1.61E-13 |
| 864   | H2AFX    | 451.3300265 | -1.305329144 | 0.151547 | -8.61337  | 7.09E-18 | 1.61E-16 |
| 10763 | KHDRBS2  | 0.779468613 | -1.305361829 | 0.548936 | -2.377985 | 0.017408 | 0.031702 |
| 4637  | LILRB5   | 117.7670431 | -1.306002122 | 0.262746 | -4.970587 | 6.68E-07 | 2.82E-06 |
| 4072  | MALL     | 1443.184249 | -1.306193894 | 0.246697 | -5.294733 | 1.19E-07 | 5.74E-07 |
| 8394  | EACAM22  | 1.757491011 | -1.307251667 | 0.402191 | -3.250323 | 0.001153 | 0.002692 |
| 273   | UNC93B1  | 708.7556605 | -1.308273544 | 0.122065 | -10.71784 | 8.39E-27 | 6.03E-25 |
| 8015  | F12      | 147.6947389 | -1.308553524 | 0.384252 | -3.40546  | 0.000661 | 0.001615 |
| 2308  | LPAR5    | 171.8012879 | -1.308801994 | 0.196865 | -6.648225 | 2.97E-11 | 2.52E-10 |
| 8426  | ACRV1    | 0.879683863 | -1.308898996 | 0.403876 | -3.240847 | 0.001192 | 0.002772 |
| 1294  | ICAM3    | 513.9078105 | -1.309357957 | 0.166328 | -7.872152 | 3.49E-15 | 5.28E-14 |
| 12670 | COL29A1  | 0.75416863  | -1.309467487 | 0.749284 | -1.747626 | 0.080529 | 0.124581 |
| 8627  | IFNG     | 17.50200457 | -1.309630841 | 0.414206 | -3.161785 | 0.001568 | 0.003563 |
| 4116  | KCNQ3    | 33.6346035  | -1.30966359  | 0.248419 | -5.271995 | 1.35E-07 | 6.43E-07 |
| 231   | DNTTIP1  | 603.4843623 | -1.310265663 | 0.119379 | -10.97571 | 5.00E-28 | 4.24E-26 |
| 9406  | CD177    | 26.09860949 | -1.31090499  | 0.459054 | -2.855667 | 0.004295 | 0.00895  |
| 4411  | ADAMTS4  | 1844.40914  | -1.311055231 | 0.25736  | -5.094252 | 3.50E-07 | 1.56E-06 |
| 2654  | PLCB2    | 464.5181387 | -1.31145539  | 0.207419 | -6.322727 | 2.57E-10 | 1.90E-09 |
| 15166 | SCGB1C1  | 0.37014225  | -1.311482891 | 1.370248 | -0.957113 | 0.33851  | 0.437501 |
| 2709  | UBQLNL   | 15.7249112  | -1.311715101 | 0.209137 | -6.272045 | 3.56E-10 | 2.58E-09 |
| 16016 | LCN15    | 0.251116269 | -1.313479969 | 1.857289 | -0.707203 | 0.47944  | 0.586758 |
| 3307  | WDFY4    | 286.1207627 | -1.314455228 | 0.226157 | -5.812126 | 6.17E-09 | 3.66E-08 |
| 1173  | CENPH    | 118.8608787 | -1.315228769 | 0.163192 | -8.059377 | 7.67E-16 | 1.28E-14 |
| 15376 | SSX2     | 0.356259949 | -1.315720539 | 1.46874  | -0.895816 | 0.370351 | 0.472116 |
| 267   | C22orf9  | 2201.263459 | -1.316617012 | 0.122567 | -10.742   | 6.46E-27 | 4.74E-25 |
| 4299  | ADAMTS6  | 24.13161174 | -1.317133925 | 0.255425 | -5.156637 | 2.51E-07 | 1.15E-06 |
| 3027  | SIRPB2   | 115.1476214 | -1.317895724 | 0.21916  | -6.013394 | 1.82E-09 | 1.18E-08 |
| 10135 | SYCE1    | 5.141143119 | -1.318065286 | 0.506342 | -2.603112 | 0.009238 | 0.017867 |
| 6053  | CDCP1    | 1431.631479 | -1.318410653 | 0.310806 | -4.241906 | 2.22E-05 | 7.18E-05 |
| 4587  | SELM     | 1382.442313 | -1.318450616 | 0.264095 | -4.99234  | 5.97E-07 | 2.55E-06 |
| 6768  | SSPO     | 26.36225551 | -1.319392298 | 0.337314 | -3.91147  | 9.17E-05 | 0.000266 |
| 1057  | CNN2     | 1821.056309 | -1.320503717 | 0.160368 | -8.234191 | 1.81E-16 | 3.35E-15 |
| 4064  | GLI4     | 173.9883582 | -1.32064343  | 0.249258 | -5.298291 | 1.17E-07 | 5.64E-07 |
| 3134  | BOP1     | 248.9203154 | -1.320903499 | 0.222508 | -5.936441 | 2.91E-09 | 1.82E-08 |
| 4164  | NFKBIZ   | 520.9715559 | -1.321079204 | 0.25205  | -5.241336 | 1.59E-07 | 7.50E-07 |
| 1580  | IL27RA   | 452.337463  | -1.321177382 | 0.177447 | -7.445478 | 9.66E-14 | 1.20E-12 |
| 8650  | GPR109A  | 79.25070854 | -1.321205161 | 0.419247 | -3.151377 | 0.001625 | 0.003682 |
| 13076 | GPHA2    | 0.519693137 | -1.32154551  | 0.815415 | -1.620704 | 0.105081 | 0.157505 |
| 7019  | TPSAB1   | 236.7461144 | -1.321706699 | 0.3464   | -3.81555  | 0.000136 | 0.000379 |
| 6253  | PTGS2    | 225.9235997 | -1.322650002 | 0.318471 | -4.15312  | 3.28E-05 | 0.000103 |
| 16935 | CT45A6   | 0.239269091 | -1.323453327 | 2.913995 | -0.454171 | 0.649705 | 0.751977 |
| 4479  | GZMB     | 144.0111172 | -1.324185172 | 0.262066 | -5.052876 | 4.35E-07 | 1.90E-06 |
| 2550  | TRIM36   | 57.06345382 | -1.324400019 | 0.206102 | -6.425951 | 1.31E-10 | 1.01E-09 |
| 14933 | PHGR1    | 0.35743836  | -1.324761354 | 1.292017 | -1.025343 | 0.305201 | 0.400606 |
| 9415  | C7orf4   | 0.660469338 | -1.324799139 | 0.464468 | -2.852296 | 0.00434  | 0.009036 |
| 6624  | ZCCHC12  | 5.059801759 | -1.324995868 | 0.333341 | -3.9749   | 7.04E-05 | 0.000208 |
| 4785  | HLA-DPB2 | 18.78320656 | -1.325025884 | 0.27081  | -4.892824 | 9.94E-07 | 4.07E-06 |

|       |           |             |              |          |           |          |          |
|-------|-----------|-------------|--------------|----------|-----------|----------|----------|
| 5712  | KAZALD1   | 42.01638135 | -1.325412653 | 0.300253 | -4.414319 | 1.01E-05 | 3.48E-05 |
| 13330 | IGFL1     | 0.804162969 | -1.326014704 | 0.864701 | -1.533495 | 0.125154 | 0.184032 |
| 6096  | KIAA1755  | 67.22067226 | -1.326129986 | 0.314045 | -4.222741 | 2.41E-05 | 7.76E-05 |
| 181   | DTX2      | 387.7363063 | -1.32617221  | 0.116254 | -11.40758 | 3.83E-30 | 4.15E-28 |
| 11385 | C17orf50  | 0.53198766  | -1.326217208 | 0.6148   | -2.157153 | 0.030994 | 0.05336  |
| 9043  | SCN1A     | 2.167370564 | -1.326251283 | 0.442314 | -2.998439 | 0.002714 | 0.005882 |
| 8660  | LOC121838 | 12.40049556 | -1.327585698 | 0.421874 | -3.146879 | 0.00165  | 0.003735 |
| 3061  | PVT1      | 178.5969073 | -1.32829225  | 0.221702 | -5.991334 | 2.08E-09 | 1.33E-08 |
| 529   | KIAA1949  | 1957.555039 | -1.328341916 | 0.13945  | -9.525565 | 1.64E-21 | 6.08E-20 |
| 13074 | KLK7      | 2.238579138 | -1.328639495 | 0.81928  | -1.621716 | 0.104864 | 0.157216 |
| 11587 | NBPF4     | 1.203741697 | -1.330209595 | 0.637873 | -2.085383 | 0.037035 | 0.062649 |
| 4841  | TBC1D3H   | 20.01504528 | -1.330304171 | 0.273173 | -4.869824 | 1.12E-06 | 4.52E-06 |
| 3065  | CCDC81    | 13.20949421 | -1.330906566 | 0.222228 | -5.988937 | 2.11E-09 | 1.35E-08 |
| 5646  | ACAN      | 887.4964875 | -1.331253193 | 0.299214 | -4.44916  | 8.62E-06 | 2.99E-05 |
| 2554  | COL5A3    | 842.1153489 | -1.331526234 | 0.2073   | -6.423186 | 1.33E-10 | 1.02E-09 |
| 9260  | DISC2     | 0.635476955 | -1.33153803  | 0.457211 | -2.912307 | 0.003588 | 0.007594 |
| 4774  | GPR141    | 14.3841948  | -1.331708926 | 0.271951 | -4.896876 | 9.74E-07 | 4.00E-06 |
| 427   | SIPA1     | 1063.312693 | -1.332557406 | 0.134211 | -9.9288   | 3.12E-23 | 1.43E-21 |
| 14823 | PTH       | 0.274335331 | -1.33267307  | 1.259563 | -1.058044 | 0.290035 | 0.38354  |
| 5685  | COL14A1   | 1203.07531  | -1.332693169 | 0.300976 | -4.427902 | 9.52E-06 | 3.28E-05 |
| 7986  | TTC24     | 3.843363744 | -1.332756355 | 0.390141 | -3.416087 | 0.000635 | 0.001559 |
| 10551 | LOC440356 | 1.24568308  | -1.332982126 | 0.543508 | -2.452554 | 0.014185 | 0.026351 |
| 4416  | LRFN4     | 184.7738143 | -1.33318241  | 0.261817 | -5.092048 | 3.54E-07 | 1.57E-06 |
| 7661  | ACOXL     | 3.493516825 | -1.333503606 | 0.375212 | -3.554005 | 0.000379 | 0.000971 |
| 2480  | KIAA1024  | 34.94351127 | -1.333768292 | 0.205559 | -6.488483 | 8.67E-11 | 6.85E-10 |
| 9190  | ALOX15    | 0.996159971 | -1.334351125 | 0.453491 | -2.942399 | 0.003257 | 0.006946 |
| 4658  | FAM171A2  | 31.12715097 | -1.334549883 | 0.269286 | -4.955884 | 7.20E-07 | 3.03E-06 |
| 3813  | BCAT1     | 769.6525471 | -1.334551593 | 0.244192 | -5.465162 | 4.62E-08 | 2.38E-07 |
| 3507  | CDH11     | 1267.231029 | -1.334820673 | 0.235539 | -5.667079 | 1.45E-08 | 8.12E-08 |
| 2414  | TMC8      | 374.6331445 | -1.336098938 | 0.20414  | -6.545025 | 5.95E-11 | 4.83E-10 |
| 2943  | AOAH      | 361.8945759 | -1.336705598 | 0.220063 | -6.074188 | 1.25E-09 | 8.30E-09 |
| 9787  | ITLN1     | 2.395082022 | -1.336927659 | 0.491437 | -2.720443 | 0.006519 | 0.013057 |
| 6761  | TAS1R3    | 8.319128057 | -1.337276644 | 0.341545 | -3.915379 | 9.03E-05 | 0.000262 |
| 9149  | ARSI      | 34.96123982 | -1.337352008 | 0.452041 | -2.958477 | 0.003092 | 0.006623 |
| 3525  | SLA2      | 105.2045862 | -1.337451752 | 0.236497 | -5.655249 | 1.56E-08 | 8.65E-08 |
| 2368  | FAM72B    | 49.06646264 | -1.337781326 | 0.203004 | -6.589917 | 4.40E-11 | 3.64E-10 |
| 627   | TBXAS1    | 562.692743  | -1.337841623 | 0.145061 | -9.222633 | 2.90E-20 | 9.06E-19 |
| 2576  | TMEM54    | 995.2342864 | -1.33822492  | 0.208966 | -6.404027 | 1.51E-10 | 1.15E-09 |
| 5310  | RIBC2     | 9.808188766 | -1.338393657 | 0.290022 | -4.6148   | 3.93E-06 | 1.45E-05 |
| 7695  | C1orf130  | 22.87271409 | -1.338577908 | 0.37795  | -3.541683 | 0.000398 | 0.001013 |
| 2120  | C3AR1     | 595.4428636 | -1.338657509 | 0.196007 | -6.829628 | 8.51E-12 | 7.87E-11 |
| 2503  | ERCC6L    | 27.38462115 | -1.339066223 | 0.207342 | -6.458249 | 1.06E-10 | 8.29E-10 |
| 11182 | AZU1      | 1.572763854 | -1.339203112 | 0.601112 | -2.227877 | 0.025889 | 0.04538  |
| 3523  | GGN       | 10.2562844  | -1.339340868 | 0.236748 | -5.657247 | 1.54E-08 | 8.56E-08 |
| 12462 | OR7A5     | 1.15920638  | -1.339707556 | 0.73819  | -1.814855 | 0.069546 | 0.109387 |
| 14199 | LCE1C     | 0.513718888 | -1.340958385 | 1.066147 | -1.257762 | 0.208478 | 0.287793 |
| 1497  | CHST11    | 336.5529815 | -1.341139322 | 0.177085 | -7.573415 | 3.64E-14 | 4.76E-13 |

|       |          |             |              |          |           |          |          |
|-------|----------|-------------|--------------|----------|-----------|----------|----------|
| 5023  | PKNOX2   | 32.46559027 | -1.341578714 | 0.28172  | -4.762093 | 1.92E-06 | 7.48E-06 |
| 580   | RPS20    | 19602.0467  | -1.342033825 | 0.143135 | -9.37601  | 6.85E-21 | 2.32E-19 |
| 1690  | SEC14L2  | 532.5216488 | -1.342245484 | 0.183677 | -7.307655 | 2.72E-13 | 3.15E-12 |
| 1311  | MTHFD2   | 769.5866627 | -1.342372549 | 0.171032 | -7.848654 | 4.21E-15 | 6.29E-14 |
| 2710  | C19orf35 | 19.78152931 | -1.343249162 | 0.214293 | -6.268293 | 3.65E-10 | 2.64E-09 |
| 2256  | SLA      | 887.072439  | -1.343425143 | 0.200726 | -6.692819 | 2.19E-11 | 1.90E-10 |
| 526   | RPL37    | 13851.15247 | -1.34377715  | 0.141028 | -9.52847  | 1.60E-21 | 5.95E-20 |
| 10783 | GPR150   | 1.645462976 | -1.344002834 | 0.567835 | -2.36689  | 0.017938 | 0.03261  |
| 8136  | AANAT    | 1.115011712 | -1.34416017  | 0.400294 | -3.357934 | 0.000785 | 0.001892 |
| 1923  | GALK1    | 554.1240078 | -1.34477943  | 0.190458 | -7.060771 | 1.66E-12 | 1.69E-11 |
| 2388  | CD86     | 407.4172526 | -1.344986544 | 0.204716 | -6.570026 | 5.03E-11 | 4.13E-10 |
| 2841  | TRAPPC5  | 753.5831845 | -1.345018225 | 0.218661 | -6.151156 | 7.69E-10 | 5.31E-09 |
| 1571  | PRAF2    | 605.8730942 | -1.345179746 | 0.180127 | -7.46796  | 8.14E-14 | 1.02E-12 |
| 1696  | APOBEC3C | 458.7005587 | -1.345903168 | 0.184481 | -7.29562  | 2.97E-13 | 3.44E-12 |
| 6292  | TRIM31   | 3.189915284 | -1.346246446 | 0.325803 | -4.132087 | 3.59E-05 | 0.000112 |
| 10207 | POU5F2   | 0.693433654 | -1.346254874 | 0.52188  | -2.579625 | 0.009891 | 0.018994 |
| 7946  | KCNJ4    | 14.1047407  | -1.346311224 | 0.392586 | -3.42934  | 0.000605 | 0.001493 |
| 4972  | ST8SIA1  | 50.42372501 | -1.346662732 | 0.28125  | -4.788136 | 1.68E-06 | 6.64E-06 |
| 2807  | CASS4    | 77.86014941 | -1.347084863 | 0.217891 | -6.182391 | 6.31E-10 | 4.41E-09 |
| 1404  | TCIRG1   | 1147.588597 | -1.347518971 | 0.174884 | -7.705206 | 1.31E-14 | 1.82E-13 |
| 1424  | IL23A    | 7.96895728  | -1.347841692 | 0.1756   | -7.67565  | 1.65E-14 | 2.27E-13 |
| 6434  | POU5F1   | 398.4636864 | -1.347928372 | 0.332346 | -4.055796 | 5.00E-05 | 0.000152 |
| 2879  | C19orf60 | 482.4665287 | -1.348049474 | 0.220111 | -6.124397 | 9.10E-10 | 6.20E-09 |
| 11913 | CLC      | 0.638656259 | -1.348124439 | 0.679351 | -1.98443  | 0.047208 | 0.077673 |
| 3489  | CMKLR1   | 590.2862767 | -1.348466432 | 0.237321 | -5.682045 | 1.33E-08 | 7.48E-08 |
| 12228 | GLP2R    | 2.025557867 | -1.348965179 | 0.714077 | -1.889102 | 0.058878 | 0.094379 |
| 9296  | ALAS2    | 24.35976254 | -1.349537817 | 0.465153 | -2.901276 | 0.003716 | 0.007836 |
| 3536  | RDH16    | 5.564515783 | -1.349920923 | 0.239181 | -5.643931 | 1.66E-08 | 9.21E-08 |
| 1619  | FCGR2A   | 1794.265728 | -1.350442446 | 0.182408 | -7.403431 | 1.33E-13 | 1.61E-12 |
| 5894  | STAR     | 5.603034297 | -1.350555672 | 0.312369 | -4.323584 | 1.54E-05 | 5.11E-05 |
| 1407  | GEFT     | 311.3400428 | -1.350743139 | 0.17555  | -7.694369 | 1.42E-14 | 1.98E-13 |
| 4315  | ANKLE1   | 11.31613021 | -1.351406014 | 0.262515 | -5.147928 | 2.63E-07 | 1.20E-06 |
| 6174  | CCR8     | 5.784237142 | -1.351746195 | 0.322731 | -4.188461 | 2.81E-05 | 8.92E-05 |
| 2323  | NFE2L3   | 1008.167916 | -1.351818835 | 0.203705 | -6.636175 | 3.22E-11 | 2.72E-10 |
| 4007  | GZMH     | 139.3293958 | -1.352386306 | 0.253407 | -5.336812 | 9.46E-08 | 4.63E-07 |
| 4734  | NKG7     | 543.4233741 | -1.353244051 | 0.275222 | -4.916916 | 8.79E-07 | 3.64E-06 |
| 8366  | CCDC135  | 13.32600703 | -1.354551501 | 0.414843 | -3.265216 | 0.001094 | 0.002563 |
| 689   | NME4     | 1862.881639 | -1.355563339 | 0.149907 | -9.042679 | 1.53E-19 | 4.35E-18 |
| 7013  | C1QTNF3  | 620.878426  | -1.356265565 | 0.355242 | -3.817864 | 0.000135 | 0.000376 |
| 7748  | ESPNL    | 26.36862702 | -1.356568891 | 0.385443 | -3.519508 | 0.000432 | 0.001094 |
| 3339  | OASL     | 244.9843941 | -1.356623184 | 0.234224 | -5.791995 | 6.96E-09 | 4.08E-08 |
| 11429 | C19orf45 | 0.606998693 | -1.357065664 | 0.634251 | -2.139636 | 0.032384 | 0.055536 |
| 8595  | C17orf64 | 0.993035323 | -1.357680456 | 0.427503 | -3.175839 | 0.001494 | 0.003407 |
| 8764  | MIA      | 2.214994906 | -1.358157043 | 0.438041 | -3.100526 | 0.001932 | 0.00432  |
| 6566  | ART4     | 28.03412341 | -1.358268041 | 0.33974  | -3.997969 | 6.39E-05 | 0.000191 |
| 898   | GPX1     | 5575.603257 | -1.360358095 | 0.159519 | -8.527856 | 1.49E-17 | 3.25E-16 |
| 4761  | TLR8     | 163.1227091 | -1.360473326 | 0.27742  | -4.904017 | 9.39E-07 | 3.87E-06 |

|       |           |             |              |          |           |          |          |
|-------|-----------|-------------|--------------|----------|-----------|----------|----------|
| 233   | CCM2      | 1281.864795 | -1.360535849 | 0.124012 | -10.97099 | 5.27E-28 | 4.43E-26 |
| 1978  | LHFPL2    | 1702.337381 | -1.360958332 | 0.194628 | -6.992616 | 2.70E-12 | 2.67E-11 |
| 5491  | FOXF2     | 19.39856745 | -1.36102045  | 0.300714 | -4.525966 | 6.01E-06 | 2.15E-05 |
| 12346 | TFF1      | 2.974628035 | -1.361070335 | 0.73573  | -1.84996  | 0.064319 | 0.102116 |
| 12800 | C9orf53   | 0.343872972 | -1.361784269 | 0.799463 | -1.703374 | 0.088498 | 0.135513 |
| 9686  | C2orf39   | 1.642661276 | -1.361906444 | 0.495009 | -2.751279 | 0.005936 | 0.012013 |
| 10536 | FLJ45079  | 0.697950891 | -1.362751134 | 0.554477 | -2.457722 | 0.013982 | 0.026012 |
| 4979  | AHRR      | 88.93535558 | -1.363036055 | 0.284921 | -4.783905 | 1.72E-06 | 6.77E-06 |
| 10272 | FAM83E    | 1.340591434 | -1.363130654 | 0.533313 | -2.555969 | 0.010589 | 0.020206 |
| 2933  | S1PR4     | 84.83519248 | -1.363691104 | 0.224236 | -6.081511 | 1.19E-09 | 7.96E-09 |
| 9511  | GTSF1L    | 1.502887315 | -1.363938065 | 0.484349 | -2.816024 | 0.004862 | 0.01002  |
| 2193  | ARHGAP4   | 961.0693474 | -1.36421609  | 0.201683 | -6.764166 | 1.34E-11 | 1.20E-10 |
| 4517  | KIAA1324  | 67.11712672 | -1.364614392 | 0.271532 | -5.025605 | 5.02E-07 | 2.18E-06 |
| 4458  | USH2A     | 15.18653311 | -1.364686902 | 0.269508 | -5.063629 | 4.11E-07 | 1.81E-06 |
| 6279  | VSIG1     | 90.59443016 | -1.364726087 | 0.329631 | -4.140163 | 3.47E-05 | 0.000108 |
| 2749  | PIK3R6    | 78.79075491 | -1.365903089 | 0.2189   | -6.239841 | 4.38E-10 | 3.12E-09 |
| 1747  | LILRB2    | 330.9696487 | -1.36688938  | 0.188612 | -7.247096 | 4.26E-13 | 4.78E-12 |
| 280   | BCL2L12   | 141.1716233 | -1.367199275 | 0.127928 | -10.68728 | 1.17E-26 | 8.17E-25 |
| 9685  | KRT32     | 1.243078267 | -1.367692912 | 0.497103 | -2.751329 | 0.005935 | 0.012012 |
| 11093 | FABP7     | 5441.474525 | -1.370137567 | 0.607041 | -2.257077 | 0.024003 | 0.042413 |
| 11358 | LOC645323 | 2.131513649 | -1.370704794 | 0.633359 | -2.164183 | 0.03045  | 0.052549 |
| 2351  | HCFC1R1   | 2635.17527  | -1.370965433 | 0.207491 | -6.607353 | 3.91E-11 | 3.26E-10 |
| 6947  | CRYBB2    | 5.138997981 | -1.3709786   | 0.356503 | -3.845632 | 0.00012  | 0.000339 |
| 4245  | CCDC91    | 1263.365555 | -1.371745994 | 0.264627 | -5.183693 | 2.18E-07 | 1.00E-06 |
| 7557  | SYT3      | 9.38150757  | -1.372126377 | 0.381892 | -3.592968 | 0.000327 | 0.000848 |
| 6608  | RNASE10   | 2.520842111 | -1.373077171 | 0.345011 | -3.979804 | 6.90E-05 | 0.000205 |
| 5127  | ASPHD1    | 250.6877549 | -1.373569417 | 0.291336 | -4.714731 | 2.42E-06 | 9.25E-06 |
| 6700  | CACNA1F   | 26.7992879  | -1.373871734 | 0.348591 | -3.941218 | 8.11E-05 | 0.000237 |
| 1480  | SASH3     | 526.4105126 | -1.373937893 | 0.180821 | -7.598311 | 3.00E-14 | 3.97E-13 |
| 927   | FCHSD1    | 318.7143514 | -1.374156201 | 0.162019 | -8.481436 | 2.22E-17 | 4.70E-16 |
| 12080 | SNORA74E  | 0.411189752 | -1.375034031 | 0.711118 | -1.933624 | 0.053159 | 0.086256 |
| 4000  | C6orf132  | 39.94323065 | -1.376189265 | 0.257712 | -5.340019 | 9.29E-08 | 4.55E-07 |
| 9524  | MYPN      | 1.074988734 | -1.376560337 | 0.490132 | -2.808552 | 0.004976 | 0.010242 |
| 5398  | FLRT2     | 133.1101577 | -1.37674354  | 0.301501 | -4.566291 | 4.96E-06 | 1.80E-05 |
| 2115  | CORO1A    | 1374.448503 | -1.376860878 | 0.201531 | -6.831995 | 8.37E-12 | 7.76E-11 |
| 574   | SDC3      | 2516.528399 | -1.377596444 | 0.146668 | -9.392598 | 5.85E-21 | 2.00E-19 |
| 1677  | IL2RB     | 527.1047679 | -1.377624744 | 0.188018 | -7.327105 | 2.35E-13 | 2.75E-12 |
| 2074  | PON2      | 2615.790764 | -1.377766596 | 0.200391 | -6.87538  | 6.18E-12 | 5.84E-11 |
| 5382  | BEND6     | 53.96528168 | -1.378859509 | 0.301281 | -4.576652 | 4.72E-06 | 1.72E-05 |
| 12363 | SNORA74A  | 0.519658194 | -1.37928526  | 0.746842 | -1.846824 | 0.064773 | 0.102694 |
| 8629  | SLITRK2   | 135.1383206 | -1.379455205 | 0.43632  | -3.161566 | 0.001569 | 0.003565 |
| 12804 | PAGE2B    | 0.325153559 | -1.379561756 | 0.810322 | -1.702486 | 0.088664 | 0.135732 |
| 3935  | LGR6      | 12.97312107 | -1.379983678 | 0.256435 | -5.381411 | 7.39E-08 | 3.68E-07 |
| 6213  | ZNF541    | 48.55202312 | -1.380423809 | 0.330911 | -4.171586 | 3.02E-05 | 9.54E-05 |
| 8884  | DUOXA1    | 1.660356155 | -1.380473509 | 0.451338 | -3.058625 | 0.002224 | 0.004906 |
| 4763  | CNGA4     | 5.190269859 | -1.380592238 | 0.281561 | -4.903356 | 9.42E-07 | 3.88E-06 |
| 3145  | ADORA2B   | 55.44230929 | -1.380815353 | 0.233036 | -5.925328 | 3.12E-09 | 1.94E-08 |



|       |           |             |              |          |           |          |          |
|-------|-----------|-------------|--------------|----------|-----------|----------|----------|
| 6285  | GFAP      | 55.41382548 | -1.381159932 | 0.333832 | -4.137296 | 3.51E-05 | 0.00011  |
| 3930  | KCNE1L    | 2.67251732  | -1.381173044 | 0.256539 | -5.383879 | 7.29E-08 | 3.64E-07 |
| 4523  | ARRDC5    | 6.042754897 | -1.381489743 | 0.275026 | -5.023121 | 5.08E-07 | 2.20E-06 |
| 257   | GMIP      | 416.0656154 | -1.381643234 | 0.128004 | -10.79378 | 3.68E-27 | 2.81E-25 |
| 137   | RGS19     | 316.7400119 | -1.381835511 | 0.117461 | -11.76418 | 5.97E-32 | 8.54E-30 |
| 14549 | PNPLA5    | 0.810481626 | -1.382502504 | 1.201167 | -1.150966 | 0.249746 | 0.336468 |
| 10786 | CSF3      | 2.131196767 | -1.382771012 | 0.584408 | -2.366107 | 0.017976 | 0.032666 |
| 696   | TRAM2     | 1166.064489 | -1.383789527 | 0.153211 | -9.031901 | 1.69E-19 | 4.75E-18 |
| 9683  | CRNA0011  | 0.807623284 | -1.38513656  | 0.5033   | -2.752108 | 0.005921 | 0.011986 |
| 9228  | LYG2      | 1.272243849 | -1.385704695 | 0.473207 | -2.928327 | 0.003408 | 0.007239 |
| 4449  | SIGLEC8   | 168.093459  | -1.386239618 | 0.273246 | -5.073233 | 3.91E-07 | 1.72E-06 |
| 3485  | GZMM      | 42.00723999 | -1.386877997 | 0.244012 | -5.683645 | 1.32E-08 | 7.42E-08 |
| 10711 | MS4A15    | 1.071476468 | -1.387019783 | 0.579442 | -2.393718 | 0.016679 | 0.030522 |
| 9439  | LOC285847 | 0.949258746 | -1.387369625 | 0.488151 | -2.842088 | 0.004482 | 0.009307 |
| 4912  | WFIKKN1   | 100.1791847 | -1.387810491 | 0.287852 | -4.821261 | 1.43E-06 | 5.69E-06 |
| 986   | CDC25B    | 1246.454586 | -1.387825094 | 0.165891 | -8.365878 | 5.97E-17 | 1.19E-15 |
| 7122  | COL28A1   | 12.18277298 | -1.388213116 | 0.367507 | -3.777375 | 0.000158 | 0.000436 |
| 3669  | OSR1      | 39.65023263 | -1.388370351 | 0.249923 | -5.555183 | 2.77E-08 | 1.48E-07 |
| 3780  | SLC2A3    | 3936.041536 | -1.388777656 | 0.253156 | -5.485851 | 4.11E-08 | 2.13E-07 |
| 10710 | SPIC      | 2.082785572 | -1.389139612 | 0.580315 | -2.393768 | 0.016676 | 0.03052  |
| 3148  | CD180     | 161.1483978 | -1.38937265  | 0.234515 | -5.924463 | 3.13E-09 | 1.95E-08 |
| 129   | MAN2B1    | 2817.204695 | -1.389918371 | 0.116658 | -11.91451 | 9.94E-33 | 1.51E-30 |
| 4341  | LRGUK     | 17.54017133 | -1.39117045  | 0.270803 | -5.137196 | 2.79E-07 | 1.26E-06 |
| 1172  | C7orf29   | 428.3787344 | -1.392059048 | 0.172715 | -8.059862 | 7.64E-16 | 1.28E-14 |
| 10702 | SOX2      | 2.054561886 | -1.392272517 | 0.580834 | -2.397025 | 0.016529 | 0.030273 |
| 1282  | PUSL1     | 136.960225  | -1.392344139 | 0.176548 | -7.886485 | 3.11E-15 | 4.75E-14 |
| 8456  | CXorf65   | 1.647166972 | -1.392526284 | 0.431564 | -3.2267   | 0.001252 | 0.002903 |
| 1346  | LILRB1    | 323.3486107 | -1.392856937 | 0.178492 | -7.80346  | 6.02E-15 | 8.77E-14 |
| 6635  | CDX1      | 2.927063355 | -1.393551295 | 0.351021 | -3.969996 | 7.19E-05 | 0.000212 |
| 4722  | XCL1      | 26.22113662 | -1.394144872 | 0.283306 | -4.920978 | 8.61E-07 | 3.57E-06 |
| 2588  | IL12RB1   | 105.9888766 | -1.39446723  | 0.218119 | -6.393138 | 1.63E-10 | 1.23E-09 |
| 7230  | FSCN2     | 10.18936661 | -1.394916957 | 0.373562 | -3.734096 | 0.000188 | 0.000511 |
| 4024  | PDZD7     | 18.68979731 | -1.395403904 | 0.261976 | -5.326456 | 1.00E-07 | 4.88E-07 |
| 256   | CMTM7     | 365.003514  | -1.395577934 | 0.129227 | -10.7994  | 3.46E-27 | 2.65E-25 |
| 2608  | FAM54A    | 26.77909153 | -1.395679278 | 0.219075 | -6.370786 | 1.88E-10 | 1.41E-09 |
| 4478  | COL8A1    | 1084.779472 | -1.395801534 | 0.27622  | -5.053221 | 4.34E-07 | 1.90E-06 |
| 1864  | JOSD2     | 352.4453093 | -1.395845448 | 0.195964 | -7.122953 | 1.06E-12 | 1.11E-11 |
| 1879  | CD300LB   | 41.62436525 | -1.397110851 | 0.196503 | -7.109874 | 1.16E-12 | 1.21E-11 |
| 8945  | ONECUT2   | 41.30107418 | -1.397846793 | 0.460728 | -3.033993 | 0.002413 | 0.005288 |
| 2295  | NME3      | 905.4331195 | -1.398214302 | 0.209959 | -6.659477 | 2.75E-11 | 2.35E-10 |
| 1796  | CAPG      | 3841.372915 | -1.399480793 | 0.19451  | -7.19489  | 6.25E-13 | 6.82E-12 |
| 2888  | SCARF2    | 218.9178395 | -1.399969026 | 0.228696 | -6.121519 | 9.27E-10 | 6.29E-09 |
| 1527  | CD53      | 1394.701045 | -1.40058478  | 0.186288 | -7.518385 | 5.55E-14 | 7.12E-13 |
| 2299  | SH2B2     | 67.40388356 | -1.400592218 | 0.210406 | -6.656605 | 2.80E-11 | 2.39E-10 |
| 2009  | MICALL2   | 463.4403867 | -1.400617469 | 0.201554 | -6.9491   | 3.68E-12 | 3.59E-11 |
| 1559  | IFITM2    | 4549.139071 | -1.400915524 | 0.187287 | -7.48003  | 7.43E-14 | 9.34E-13 |
| 7565  | MMP1      | 143.471116  | -1.400926133 | 0.390187 | -3.5904   | 0.00033  | 0.000855 |

|       |           |             |              |          |           |          |          |
|-------|-----------|-------------|--------------|----------|-----------|----------|----------|
| 2453  | KLRB1     | 123.665128  | -1.401055649 | 0.215202 | -6.510434 | 7.49E-11 | 5.99E-10 |
| 7083  | HS3ST2    | 131.1028562 | -1.401952754 | 0.369828 | -3.790825 | 0.00015  | 0.000416 |
| 2899  | FAM198A   | 20.40590959 | -1.402548028 | 0.229432 | -6.113128 | 9.77E-10 | 6.61E-09 |
| 1817  | MAFB      | 1326.769919 | -1.402669111 | 0.195558 | -7.172662 | 7.36E-13 | 7.93E-12 |
| 5579  | SPNS3     | 68.73905115 | -1.402715148 | 0.312858 | -4.483554 | 7.34E-06 | 2.58E-05 |
| 15121 | RBPJL     | 0.286605602 | -1.402769415 | 1.450355 | -0.96719  | 0.333449 | 0.43227  |
| 4641  | GSDMB     | 81.28804    | -1.403004214 | 0.282439 | -4.967458 | 6.78E-07 | 2.87E-06 |
| 11466 | ATP2B3    | 2.154852177 | -1.403646806 | 0.659067 | -2.129748 | 0.033192 | 0.056742 |
| 702   | GPSM3     | 671.6012329 | -1.40412316  | 0.155745 | -9.015537 | 1.96E-19 | 5.47E-18 |
| 12789 | OEOP      | 3.282157981 | -1.404288607 | 0.822354 | -1.707644 | 0.087702 | 0.134417 |
| 11340 | TTC29     | 0.522579749 | -1.40454939  | 0.647458 | -2.16933  | 0.030058 | 0.051954 |
| 4423  | UBASH3A   | 48.555984   | -1.404571652 | 0.276052 | -5.088076 | 3.62E-07 | 1.60E-06 |
| 922   | LENG9     | 110.2360488 | -1.405633223 | 0.165634 | -8.486375 | 2.13E-17 | 4.53E-16 |
| 6590  | CHST8     | 2.08180791  | -1.405837674 | 0.352566 | -3.98744  | 6.68E-05 | 0.000199 |
| 12587 | SNORA57   | 0.549809802 | -1.406250902 | 0.791276 | -1.777194 | 0.075536 | 0.117628 |
| 2167  | ADORA3    | 352.0834848 | -1.406488482 | 0.206958 | -6.796003 | 1.08E-11 | 9.73E-11 |
| 3243  | TOP2A     | 669.7949822 | -1.407282585 | 0.240244 | -5.857727 | 4.69E-09 | 2.84E-08 |
| 3549  | C10orf55  | 10.12910946 | -1.407398144 | 0.249685 | -5.636697 | 1.73E-08 | 9.57E-08 |
| 980   | FTL       | 79459.07808 | -1.407643691 | 0.16804  | -8.376845 | 5.44E-17 | 1.09E-15 |
| 3838  | LOC145820 | 104.5158474 | -1.408006868 | 0.258743 | -5.441722 | 5.28E-08 | 2.69E-07 |
| 8360  | C20orf106 | 1.055081181 | -1.408060281 | 0.430996 | -3.266995 | 0.001087 | 0.002548 |
| 9642  | IL2       | 0.625914656 | -1.409045672 | 0.509448 | -2.76583  | 0.005678 | 0.011542 |
| 3306  | ETV1      | 323.2733723 | -1.40915681  | 0.242438 | -5.812447 | 6.16E-09 | 3.65E-08 |
| 1074  | AGAP2     | 158.1965605 | -1.40919042  | 0.171832 | -8.200957 | 2.38E-16 | 4.35E-15 |
| 1084  | SC65      | 773.0248739 | -1.410598385 | 0.172362 | -8.183939 | 2.75E-16 | 4.97E-15 |
| 4510  | GHRL      | 5.536244868 | -1.411358591 | 0.280644 | -5.029004 | 4.93E-07 | 2.14E-06 |
| 8657  | MT1G      | 395.439588  | -1.412296335 | 0.44862  | -3.14809  | 0.001643 | 0.003721 |
| 7246  | MYBPC3    | 2.382503096 | -1.412379701 | 0.378889 | -3.727684 | 0.000193 | 0.000523 |
| 1647  | ARHGAP22  | 152.7189628 | -1.412904567 | 0.19184  | -7.365021 | 1.77E-13 | 2.11E-12 |
| 9305  | NOG       | 62.56482851 | -1.412954229 | 0.487337 | -2.899339 | 0.00374  | 0.007877 |
| 1474  | RTN2      | 165.4583662 | -1.413281124 | 0.185861 | -7.603977 | 2.87E-14 | 3.82E-13 |
| 479   | RPS2      | 13694.27712 | -1.413839875 | 0.145784 | -9.69819  | 3.07E-22 | 1.26E-20 |
| 1319  | NAT14     | 348.4608903 | -1.414291908 | 0.180472 | -7.836607 | 4.63E-15 | 6.88E-14 |
| 2625  | TMPRSS13  | 10.92219752 | -1.414852152 | 0.222695 | -6.353327 | 2.11E-10 | 1.57E-09 |
| 6519  | FER1L4    | 441.465926  | -1.415219349 | 0.352111 | -4.019247 | 5.84E-05 | 0.000176 |
| 1806  | IL10RA    | 1107.44834  | -1.415328231 | 0.197028 | -7.183399 | 6.80E-13 | 7.38E-12 |
| 13912 | OTOS      | 0.92907774  | -1.415649767 | 1.051063 | -1.346875 | 0.178021 | 0.250818 |
| 8946  | OR2L13    | 0.723586585 | -1.416076263 | 0.46675  | -3.03391  | 0.002414 | 0.005289 |
| 3264  | RAD54B    | 123.1200889 | -1.416565522 | 0.242575 | -5.83971  | 5.23E-09 | 3.14E-08 |
| 4842  | GBP5      | 713.1415731 | -1.416883287 | 0.290965 | -4.869597 | 1.12E-06 | 4.53E-06 |
| 11374 | C1QTNF8   | 0.724336823 | -1.417149719 | 0.65612  | -2.159894 | 0.030781 | 0.053041 |
| 4828  | GSC       | 5.608848583 | -1.419885018 | 0.291151 | -4.876795 | 1.08E-06 | 4.38E-06 |
| 44    | PLIN3     | 1576.577613 | -1.421070162 | 0.10691  | -13.29227 | 2.57E-40 | 1.14E-37 |
| 7684  | ROR2      | 263.1287461 | -1.421091015 | 0.400829 | -3.545383 | 0.000392 | 0.001    |
| 4283  | SCN3B     | 95.969344   | -1.421194336 | 0.275182 | -5.164562 | 2.41E-07 | 1.10E-06 |
| 2206  | NCAPG     | 152.1642526 | -1.421360465 | 0.210595 | -6.749269 | 1.49E-11 | 1.32E-10 |
| 3410  | CKAP2L    | 59.30882821 | -1.421426569 | 0.247595 | -5.740932 | 9.42E-09 | 5.41E-08 |

|       |           |             |              |          |           |          |          |
|-------|-----------|-------------|--------------|----------|-----------|----------|----------|
| 2079  | IFITM1    | 2912.42909  | -1.421549923 | 0.206842 | -6.872653 | 6.30E-12 | 5.94E-11 |
| 3002  | SHCBP1    | 125.4342596 | -1.422623112 | 0.235867 | -6.031459 | 1.62E-09 | 1.06E-08 |
| 964   | TGFB1     | 3201.417802 | -1.422733997 | 0.168943 | -8.421363 | 3.72E-17 | 7.57E-16 |
| 3001  | TYMP      | 2353.59845  | -1.422901346 | 0.235905 | -6.031683 | 1.62E-09 | 1.06E-08 |
| 2855  | SPAG4     | 826.2630262 | -1.423686728 | 0.231851 | -6.140534 | 8.22E-10 | 5.65E-09 |
| 6507  | PTCHD2    | 6.651483218 | -1.424009535 | 0.353853 | -4.024292 | 5.71E-05 | 0.000172 |
| 9654  | IFITM4P   | 0.662664473 | -1.424903091 | 0.515744 | -2.762811 | 0.005731 | 0.011635 |
| 1898  | AMICA1    | 354.3858317 | -1.425271469 | 0.201083 | -7.087992 | 1.36E-12 | 1.40E-11 |
| 2095  | 44075     | 200.9406267 | -1.425807572 | 0.208071 | -6.852511 | 7.26E-12 | 6.79E-11 |
| 7672  | C1orf173  | 11.69101446 | -1.426228049 | 0.401711 | -3.550385 | 0.000385 | 0.000983 |
| 3079  | NCF1B     | 42.42429369 | -1.426259716 | 0.238621 | -5.977084 | 2.27E-09 | 1.45E-08 |
| 3654  | ADAMTS10  | 279.9564299 | -1.428891413 | 0.25666  | -5.567249 | 2.59E-08 | 1.39E-07 |
| 1567  | S100A6    | 9901.62634  | -1.430955782 | 0.191533 | -7.47105  | 7.96E-14 | 9.95E-13 |
| 8778  | DCC       | 2.742877442 | -1.431069104 | 0.462689 | -3.092943 | 0.001982 | 0.004425 |
| 5775  | FAM129C   | 4.54478343  | -1.431989514 | 0.326717 | -4.382968 | 1.17E-05 | 3.97E-05 |
| 1685  | ALOX5AP   | 360.8120375 | -1.432155292 | 0.195817 | -7.313752 | 2.60E-13 | 3.02E-12 |
| 1215  | C7orf40   | 507.8104311 | -1.432249159 | 0.179078 | -7.997897 | 1.27E-15 | 2.04E-14 |
| 2806  | PDLIM3    | 615.2692751 | -1.432579297 | 0.231708 | -6.182688 | 6.30E-10 | 4.40E-09 |
| 2329  | IKBKE     | 235.5655892 | -1.432946959 | 0.216216 | -6.627383 | 3.42E-11 | 2.88E-10 |
| 4427  | LTC4S     | 65.43559382 | -1.432954878 | 0.281713 | -5.086571 | 3.65E-07 | 1.61E-06 |
| 2861  | POLQ      | 43.19351055 | -1.434035628 | 0.233757 | -6.134739 | 8.53E-10 | 5.84E-09 |
| 1738  | RHBDL2    | 43.26475846 | -1.434288699 | 0.197712 | -7.254436 | 4.03E-13 | 4.55E-12 |
| 2548  | C19orf24  | 804.534282  | -1.434424931 | 0.223193 | -6.426846 | 1.30E-10 | 1.00E-09 |
| 1872  | NDC80     | 101.3037229 | -1.434482876 | 0.201523 | -7.118209 | 1.09E-12 | 1.14E-11 |
| 1093  | C1orf59   | 98.40220627 | -1.434602428 | 0.175569 | -8.171142 | 3.05E-16 | 5.48E-15 |
| 819   | MXD3      | 204.8861781 | -1.434875981 | 0.16466  | -8.714159 | 2.93E-18 | 7.01E-17 |
| 9925  | MEP1A     | 1.626459747 | -1.43601046  | 0.536023 | -2.67901  | 0.007384 | 0.014583 |
| 2090  | PRR19     | 13.62903985 | -1.436665249 | 0.209568 | -6.855365 | 7.11E-12 | 6.67E-11 |
| 13493 | KCNK16    | 0.252363766 | -1.436747414 | 0.96411  | -1.490232 | 0.136163 | 0.197801 |
| 854   | C1orf38   | 782.9725664 | -1.437005422 | 0.166454 | -8.633052 | 5.97E-18 | 1.37E-16 |
| 1436  | OIP5      | 27.42574071 | -1.437114065 | 0.187855 | -7.650136 | 2.01E-14 | 2.74E-13 |
| 6184  | PLXNA4    | 61.08601534 | -1.437613557 | 0.343667 | -4.183162 | 2.87E-05 | 9.11E-05 |
| 3034  | TMEM160   | 102.5614192 | -1.438696526 | 0.23944  | -6.0086   | 1.87E-09 | 1.21E-08 |
| 3817  | ASPM      | 185.6116289 | -1.439422437 | 0.263484 | -5.46304  | 4.68E-08 | 2.40E-07 |
| 2885  | FABP5     | 117.1993657 | -1.439635374 | 0.235129 | -6.122739 | 9.20E-10 | 6.25E-09 |
| 1979  | DDIT4     | 11726.66586 | -1.439657054 | 0.205949 | -6.99035  | 2.74E-12 | 2.72E-11 |
| 6192  | LOC730668 | 3.260549258 | -1.440164274 | 0.344669 | -4.178399 | 2.94E-05 | 9.29E-05 |
| 777   | RRAS      | 1357.5362   | -1.44036808  | 0.163291 | -8.820884 | 1.14E-18 | 2.86E-17 |
| 5231  | TSLP      | 11.81686354 | -1.440485389 | 0.3089   | -4.663279 | 3.11E-06 | 1.17E-05 |
| 4071  | FRRS1     | 146.0111651 | -1.440936804 | 0.272127 | -5.295082 | 1.19E-07 | 5.73E-07 |
| 2405  | CORO2A    | 174.3363913 | -1.441280221 | 0.219975 | -6.552019 | 5.68E-11 | 4.63E-10 |
| 8288  | IGJ       | 4002.932146 | -1.442163919 | 0.4373   | -3.297882 | 0.000974 | 0.002304 |
| 5972  | GJA3      | 8.416840377 | -1.442821015 | 0.337035 | -4.280924 | 1.86E-05 | 6.11E-05 |
| 7446  | SMC1B     | 3.865229894 | -1.443257007 | 0.396648 | -3.638631 | 0.000274 | 0.000722 |
| 10534 | LOC283404 | 0.531622395 | -1.443986938 | 0.587177 | -2.459204 | 0.013925 | 0.02591  |
| 7275  | TFF3      | 105.5260495 | -1.444147197 | 0.389009 | -3.71237  | 0.000205 | 0.000553 |
| 628   | APOL2     | 2455.404236 | -1.444822565 | 0.156721 | -9.219087 | 3.00E-20 | 9.35E-19 |

|       |           |             |              |          |           |          |          |
|-------|-----------|-------------|--------------|----------|-----------|----------|----------|
| 907   | FSCN1     | 2215.95183  | -1.445940962 | 0.169925 | -8.509307 | 1.75E-17 | 3.78E-16 |
| 1615  | PXDN      | 3262.278764 | -1.446792624 | 0.19529  | -7.408436 | 1.28E-13 | 1.55E-12 |
| 3221  | SGOL1     | 18.00705903 | -1.448334107 | 0.246608 | -5.873025 | 4.28E-09 | 2.60E-08 |
| 2738  | CD5       | 158.4306461 | -1.448602809 | 0.231836 | -6.248392 | 4.15E-10 | 2.97E-09 |
| 1554  | MICAL2    | 1223.032633 | -1.448940228 | 0.193491 | -7.488397 | 6.97E-14 | 8.79E-13 |
| 2504  | CCDC3     | 551.6515193 | -1.449062709 | 0.224382 | -6.458009 | 1.06E-10 | 8.30E-10 |
| 1752  | MAP6D1    | 56.12917313 | -1.449517347 | 0.200164 | -7.241664 | 4.43E-13 | 4.96E-12 |
| 3158  | TBC1D10C  | 174.473949  | -1.449558009 | 0.245164 | -5.912604 | 3.37E-09 | 2.09E-08 |
| 6626  | CYP21A2   | 148.5046679 | -1.44966979  | 0.364776 | -3.974134 | 7.06E-05 | 0.000209 |
| 11807 | INS-IGF2  | 1.545948407 | -1.450628554 | 0.718431 | -2.019163 | 0.04347  | 0.072166 |
| 3844  | TIGIT     | 96.9643058  | -1.451410417 | 0.266956 | -5.436899 | 5.42E-08 | 2.76E-07 |
| 2053  | RECQL4    | 111.0421972 | -1.452092673 | 0.21048  | -6.898956 | 5.24E-12 | 5.00E-11 |
| 6580  | AMZ1      | 48.76735287 | -1.453077856 | 0.364087 | -3.991015 | 6.58E-05 | 0.000196 |
| 5253  | LANCL3    | 4.421542596 | -1.453138475 | 0.312505 | -4.649974 | 3.32E-06 | 1.24E-05 |
| 3459  | C14orf182 | 6.02646677  | -1.45399752  | 0.255104 | -5.699623 | 1.20E-08 | 6.80E-08 |
| 847   | ZNHIT1    | 1736.403268 | -1.454180571 | 0.168318 | -8.639504 | 5.65E-18 | 1.31E-16 |
| 8149  | TNFSF11   | 12.24375211 | -1.454848721 | 0.43398  | -3.352342 | 0.000801 | 0.001927 |
| 12576 | INSL5     | 0.454545017 | -1.455787016 | 0.818061 | -1.779558 | 0.075148 | 0.117126 |
| 3954  | CCDC74B   | 144.8041754 | -1.455893063 | 0.270916 | -5.373969 | 7.70E-08 | 3.82E-07 |
| 5625  | NNMT      | 21229.27609 | -1.456263404 | 0.326597 | -4.458896 | 8.24E-06 | 2.87E-05 |
| 1784  | C21orf56  | 119.194262  | -1.457266525 | 0.202298 | -7.203555 | 5.87E-13 | 6.45E-12 |
| 3559  | ASGR1     | 25.60467065 | -1.457320378 | 0.258921 | -5.628446 | 1.82E-08 | 1.00E-07 |
| 1375  | LOC654342 | 795.5479614 | -1.45774883  | 0.187837 | -7.760701 | 8.45E-15 | 1.20E-13 |
| 1415  | PARVG     | 441.1951208 | -1.457750045 | 0.189745 | -7.682672 | 1.56E-14 | 2.16E-13 |
| 3375  | FHAD1     | 18.99285128 | -1.458635811 | 0.253119 | -5.762652 | 8.28E-09 | 4.81E-08 |
| 4598  | FMO3      | 341.0617835 | -1.458817472 | 0.292441 | -4.988416 | 6.09E-07 | 2.59E-06 |
| 4225  | RPLP0P2   | 17.20169843 | -1.459614219 | 0.280924 | -5.19576  | 2.04E-07 | 9.46E-07 |
| 4002  | LY6E      | 6674.059442 | -1.460021073 | 0.273435 | -5.339556 | 9.32E-08 | 4.56E-07 |
| 615   | LAGE3     | 258.8359972 | -1.460493387 | 0.157506 | -9.272606 | 1.82E-20 | 5.79E-19 |
| 5161  | EFEMP1    | 3118.835453 | -1.461201728 | 0.311295 | -4.693942 | 2.68E-06 | 1.02E-05 |
| 11622 | ARL5C     | 0.475938363 | -1.461373573 | 0.705482 | -2.071455 | 0.038316 | 0.064622 |
| 12643 | LRRC18    | 0.483934184 | -1.461435225 | 0.830778 | -1.759117 | 0.078558 | 0.121791 |
| 1130  | IL15RA    | 403.0788686 | -1.461503838 | 0.180072 | -8.116232 | 4.81E-16 | 8.34E-15 |
| 1505  | ITGAM     | 508.450719  | -1.461709088 | 0.193398 | -7.558019 | 4.09E-14 | 5.33E-13 |
| 1913  | GPR19     | 12.13331049 | -1.463129339 | 0.206806 | -7.074885 | 1.50E-12 | 1.53E-11 |
| 2871  | C19orf76  | 21.57890418 | -1.463249974 | 0.238731 | -6.129282 | 8.83E-10 | 6.03E-09 |
| 15991 | FAM25A    | 0.27670052  | -1.463864557 | 2.047877 | -0.71482  | 0.47472  | 0.581889 |
| 1080  | NFAM1     | 351.835445  | -1.46518214  | 0.178896 | -8.190149 | 2.61E-16 | 4.74E-15 |
| 2236  | DOCK2     | 718.3224003 | -1.465363871 | 0.21821  | -6.715382 | 1.88E-11 | 1.64E-10 |
| 8436  | GPR15     | 4.451177253 | -1.465410606 | 0.45317  | -3.233685 | 0.001222 | 0.002839 |
| 12765 | CCL24     | 0.651470458 | -1.465946856 | 0.854959 | -1.714641 | 0.086411 | 0.132687 |
| 8069  | LOC400696 | 17.33347076 | -1.466192983 | 0.433221 | -3.384402 | 0.000713 | 0.001733 |
| 2605  | SNX20     | 71.06185307 | -1.466227557 | 0.230063 | -6.373154 | 1.85E-10 | 1.39E-09 |
| 3830  | CD3D      | 199.57228   | -1.466352262 | 0.269218 | -5.446703 | 5.13E-08 | 2.63E-07 |
| 7999  | CFHR3     | 6.671510808 | -1.466580404 | 0.430058 | -3.410195 | 0.000649 | 0.001591 |
| 10025 | FIBCD1    | 116.4418543 | -1.467192249 | 0.554948 | -2.643836 | 0.008197 | 0.016027 |
| 9182  | CBLC      | 39.99727503 | -1.467846083 | 0.498272 | -2.945873 | 0.00322  | 0.006875 |

|       |          |             |              |          |           |          |          |
|-------|----------|-------------|--------------|----------|-----------|----------|----------|
| 1442  | CD33     | 134.7696861 | -1.467890286 | 0.192083 | -7.641943 | 2.14E-14 | 2.91E-13 |
| 3595  | LOC91450 | 5.518827751 | -1.467905737 | 0.261788 | -5.607223 | 2.06E-08 | 1.12E-07 |
| 2589  | KIF7     | 106.4806473 | -1.46831232  | 0.229672 | -6.393083 | 1.63E-10 | 1.23E-09 |
| 1732  | C16orf13 | 1347.252539 | -1.46927218  | 0.20221  | -7.266088 | 3.70E-13 | 4.19E-12 |
| 3055  | CD80     | 28.68381783 | -1.469389827 | 0.245158 | -5.993654 | 2.05E-09 | 1.32E-08 |
| 2988  | FBXO43   | 12.26409926 | -1.469718093 | 0.243142 | -6.044696 | 1.50E-09 | 9.82E-09 |
| 3216  | CD3E     | 561.0521725 | -1.469734686 | 0.250089 | -5.876844 | 4.18E-09 | 2.55E-08 |
| 2383  | IRF7     | 597.4411814 | -1.469792697 | 0.223561 | -6.574446 | 4.88E-11 | 4.02E-10 |
| 1238  | MYO1F    | 719.1311597 | -1.469867045 | 0.18507  | -7.942239 | 1.99E-15 | 3.14E-14 |
| 6208  | GRIK2    | 5.226369281 | -1.470426145 | 0.352325 | -4.173491 | 3.00E-05 | 9.47E-05 |
| 12148 | AWAT2    | 0.390048917 | -1.470978569 | 0.769147 | -1.91248  | 0.055815 | 0.090058 |
| 1458  | BEST1    | 129.2232415 | -1.471180891 | 0.192904 | -7.626473 | 2.41E-14 | 3.24E-13 |
| 772   | CD99     | 3026.070383 | -1.471431343 | 0.166671 | -8.828336 | 1.06E-18 | 2.70E-17 |
| 12465 | SLC39A12 | 0.348491677 | -1.471581279 | 0.811561 | -1.813271 | 0.06979  | 0.109744 |
| 4150  | S100A8   | 250.7351322 | -1.47202092  | 0.280295 | -5.251687 | 1.51E-07 | 7.12E-07 |
| 5935  | SPTA1    | 4.502233967 | -1.472069702 | 0.342284 | -4.300729 | 1.70E-05 | 5.62E-05 |
| 2671  | PRKCDBP  | 1075.964909 | -1.472285419 | 0.233292 | -6.310902 | 2.77E-10 | 2.04E-09 |
| 6070  | SEMA3A   | 73.2945761  | -1.472289229 | 0.347528 | -4.23646  | 2.27E-05 | 7.33E-05 |
| 5202  | NRN1L    | 5.051510412 | -1.472416915 | 0.314813 | -4.677115 | 2.91E-06 | 1.10E-05 |
| 2560  | NOD2     | 98.02102694 | -1.472891585 | 0.229549 | -6.416452 | 1.39E-10 | 1.07E-09 |
| 45    | ANXA2    | 11411.2323  | -1.473144233 | 0.110957 | -13.2767  | 3.16E-40 | 1.38E-37 |
| 1070  | GSG2     | 18.69018017 | -1.473630238 | 0.179577 | -8.206138 | 2.28E-16 | 4.18E-15 |
| 4106  | RAB40AL  | 6.847416715 | -1.473744704 | 0.279177 | -5.278895 | 1.30E-07 | 6.20E-07 |
| 5200  | GJB5     | 5.494994863 | -1.473791927 | 0.315094 | -4.677308 | 2.91E-06 | 1.10E-05 |
| 2252  | MC1R     | 152.6452633 | -1.474064781 | 0.220204 | -6.694077 | 2.17E-11 | 1.89E-10 |
| 5911  | B3GNT4   | 181.333     | -1.474182544 | 0.341507 | -4.316692 | 1.58E-05 | 5.25E-05 |
| 2496  | SPSB1    | 1278.660579 | -1.474719382 | 0.228028 | -6.467262 | 9.98E-11 | 7.84E-10 |
| 8178  | MEIG1    | 0.815881251 | -1.474934732 | 0.441172 | -3.343219 | 0.000828 | 0.001985 |
| 934   | FMNL1    | 692.78783   | -1.47526861  | 0.174087 | -8.474336 | 2.36E-17 | 4.96E-16 |
| 312   | PLOD3    | 3029.478411 | -1.475301027 | 0.140891 | -10.47123 | 1.17E-25 | 7.36E-24 |
| 13813 | VAX1     | 0.343662369 | -1.475769841 | 1.067453 | -1.382515 | 0.166814 | 0.236713 |
| 6198  | SLC4A10  | 7.069487185 | -1.476132751 | 0.353415 | -4.17677  | 2.96E-05 | 9.35E-05 |
| 7925  | PF4V1    | 37.25904273 | -1.476822424 | 0.429534 | -3.438194 | 0.000586 | 0.001448 |
| 7940  | SCARNA5  | 4.382079075 | -1.477109099 | 0.430336 | -3.432454 | 0.000598 | 0.001477 |
| 4644  | RNF112   | 20.21327346 | -1.477229289 | 0.297549 | -4.964654 | 6.88E-07 | 2.90E-06 |
| 1788  | FBLIM1   | 1069.223716 | -1.477532408 | 0.205226 | -7.199534 | 6.04E-13 | 6.62E-12 |
| 687   | CD37     | 575.7902678 | -1.47760264  | 0.163376 | -9.04417  | 1.51E-19 | 4.30E-18 |
| 4796  | TIFAB    | 7.771428905 | -1.478514479 | 0.302417 | -4.888997 | 1.01E-06 | 4.14E-06 |
| 943   | SSBP4    | 676.8111078 | -1.478885373 | 0.174855 | -8.45778  | 2.73E-17 | 5.66E-16 |
| 1416  | MS4A6A   | 1664.769822 | -1.479752564 | 0.192669 | -7.680282 | 1.59E-14 | 2.20E-13 |
| 5154  | CDA      | 377.5577668 | -1.479998199 | 0.314951 | -4.699137 | 2.61E-06 | 9.94E-06 |
| 9822  | CCL25    | 1.177549144 | -1.480469546 | 0.546169 | -2.710643 | 0.006715 | 0.013401 |
| 7362  | IGF2BP2  | 239.3132632 | -1.480651913 | 0.403111 | -3.673066 | 0.00024  | 0.000638 |
| 5537  | C1orf186 | 426.3734306 | -1.481985088 | 0.329084 | -4.503365 | 6.69E-06 | 2.37E-05 |
| 8612  | NDST3    | 5.080568458 | -1.482107542 | 0.467586 | -3.169697 | 0.001526 | 0.003473 |
| 10299 | MAT1A    | 130.5551129 | -1.482509675 | 0.582167 | -2.546539 | 0.01088  | 0.020706 |
| 5800  | CCL23    | 4.251619554 | -1.482965107 | 0.339025 | -4.374204 | 1.22E-05 | 4.12E-05 |

|       |           |             |              |          |           |          |          |
|-------|-----------|-------------|--------------|----------|-----------|----------|----------|
| 7421  | TAT       | 2.285891695 | -1.485246804 | 0.407047 | -3.648832 | 0.000263 | 0.000696 |
| 10913 | TFAMP1    | 0.575799131 | -1.485334268 | 0.641267 | -2.316249 | 0.020545 | 0.036901 |
| 4700  | ASPN      | 435.3850332 | -1.485979664 | 0.301436 | -4.929661 | 8.24E-07 | 3.44E-06 |
| 1876  | PLEK      | 829.8583315 | -1.486166148 | 0.208994 | -7.11104  | 1.15E-12 | 1.20E-11 |
| 4686  | TTYH1     | 11.79880546 | -1.487806204 | 0.301402 | -4.936288 | 7.96E-07 | 3.33E-06 |
| 14260 | OR12D2    | 0.367536983 | -1.488170731 | 1.199441 | -1.24072  | 0.214709 | 0.295127 |
| 5942  | FRZB      | 2773.976984 | -1.488503645 | 0.346443 | -4.296532 | 1.73E-05 | 5.72E-05 |
| 5103  | TMEM90B   | 183.5332747 | -1.489688452 | 0.315169 | -4.726629 | 2.28E-06 | 8.77E-06 |
| 844   | TMEM180   | 99.94807076 | -1.490097487 | 0.172319 | -8.647326 | 5.27E-18 | 1.22E-16 |
| 4668  | ELN       | 768.2090961 | -1.490344416 | 0.300982 | -4.951606 | 7.36E-07 | 3.09E-06 |
| 7053  | S100P     | 8.938071018 | -1.490456263 | 0.392248 | -3.799784 | 0.000145 | 0.000402 |
| 7747  | SLC25A2   | 1.384975045 | -1.490554542 | 0.423466 | -3.519888 | 0.000432 | 0.001092 |
| 12569 | ARHGAP36  | 0.893217297 | -1.491255739 | 0.837034 | -1.781594 | 0.074815 | 0.116673 |
| 2311  | HSPB1     | 14784.15635 | -1.491527626 | 0.224437 | -6.645646 | 3.02E-11 | 2.56E-10 |
| 5682  | SFTA1P    | 22.45378993 | -1.491943689 | 0.336795 | -4.429831 | 9.43E-06 | 3.25E-05 |
| 10784 | MYL2      | 0.346133772 | -1.493388158 | 0.631034 | -2.366575 | 0.017954 | 0.032632 |
| 1015  | FLJ36031  | 423.4772199 | -1.493399817 | 0.179617 | -8.314366 | 9.22E-17 | 1.78E-15 |
| 1599  | DOK2      | 218.6296656 | -1.493990196 | 0.201283 | -7.42232  | 1.15E-13 | 1.41E-12 |
| 8740  | PTHLH     | 1698.678543 | -1.494209359 | 0.480101 | -3.112282 | 0.001856 | 0.004163 |
| 1529  | KIF23     | 128.1549368 | -1.494329867 | 0.198773 | -7.517759 | 5.57E-14 | 7.14E-13 |
| 3108  | FOXS1     | 151.5800994 | -1.495558967 | 0.251053 | -5.957136 | 2.57E-09 | 1.62E-08 |
| 9990  | FAM163B   | 0.823364014 | -1.495647143 | 0.563313 | -2.65509  | 0.007929 | 0.015555 |
| 4463  | SH2D4B    | 4.294077047 | -1.496210521 | 0.295651 | -5.060731 | 4.18E-07 | 1.83E-06 |
| 710   | ZNF385A   | 673.3498581 | -1.496497178 | 0.166531 | -8.986292 | 2.56E-19 | 7.06E-18 |
| 8760  | GDF5      | 13.62476381 | -1.498113627 | 0.482967 | -3.101896 | 0.001923 | 0.004303 |
| 2304  | LILRA6    | 112.4421758 | -1.498801481 | 0.225396 | -6.649651 | 2.94E-11 | 2.50E-10 |
| 4008  | MFSD2B    | 7.237000153 | -1.499213139 | 0.280929 | -5.336624 | 9.47E-08 | 4.63E-07 |
| 903   | LOC541471 | 509.5474433 | -1.499665679 | 0.176133 | -8.514404 | 1.67E-17 | 3.63E-16 |
| 7007  | MACROD2   | 378.4182642 | -1.50027357  | 0.39273  | -3.820117 | 0.000133 | 0.000373 |
| 16160 | DSCR4     | 0.401722884 | -1.500814913 | 2.260324 | -0.663982 | 0.506702 | 0.614595 |
| 6175  | CEACAM3   | 3.579083771 | -1.501978063 | 0.358664 | -4.187698 | 2.82E-05 | 8.94E-05 |
| 1203  | PTGFRN    | 1811.286841 | -1.502148241 | 0.187508 | -8.011102 | 1.14E-15 | 1.85E-14 |
| 6289  | WNT3A     | 2.695839476 | -1.503594189 | 0.363648 | -4.134746 | 3.55E-05 | 0.000111 |
| 9744  | ANKRD34C  | 1.085011441 | -1.503680972 | 0.550009 | -2.733921 | 0.006259 | 0.01259  |
| 2757  | TMEM150E  | 25.9137326  | -1.506056184 | 0.241555 | -6.234833 | 4.52E-10 | 3.22E-09 |
| 3544  | DLGAP3    | 11.81805963 | -1.506609044 | 0.267134 | -5.639908 | 1.70E-08 | 9.41E-08 |
| 1278  | UBE2S     | 211.4813969 | -1.506741957 | 0.190877 | -7.893792 | 2.93E-15 | 4.50E-14 |
| 5686  | PDPN      | 89.64161674 | -1.507448051 | 0.340464 | -4.427631 | 9.53E-06 | 3.28E-05 |
| 2601  | RASL10B   | 81.20613668 | -1.507680811 | 0.236293 | -6.380553 | 1.76E-10 | 1.33E-09 |
| 2183  | CTGF      | 4230.755238 | -1.509026138 | 0.222761 | -6.774208 | 1.25E-11 | 1.12E-10 |
| 11764 | MUC2      | 0.603198926 | -1.509361893 | 0.742868 | -2.031805 | 0.042173 | 0.070269 |
| 15680 | KCNA10    | 0.264905283 | -1.510729457 | 1.858785 | -0.812751 | 0.416361 | 0.520477 |
| 972   | ASF1B     | 170.9107684 | -1.510866506 | 0.180036 | -8.392024 | 4.78E-17 | 9.64E-16 |
| 1163  | PAFAH1B3  | 311.9460045 | -1.511297192 | 0.187249 | -8.071045 | 6.97E-16 | 1.17E-14 |
| 6913  | PRND      | 122.79737   | -1.512340727 | 0.391952 | -3.858483 | 0.000114 | 0.000323 |
| 4589  | RRAD      | 1922.811283 | -1.513498575 | 0.303175 | -4.992154 | 5.97E-07 | 2.55E-06 |
| 4991  | EYA2      | 110.0201237 | -1.514032353 | 0.316858 | -4.778266 | 1.77E-06 | 6.94E-06 |

|       |           |             |              |          |           |          |          |
|-------|-----------|-------------|--------------|----------|-----------|----------|----------|
| 1652  | ECE2      | 129.849819  | -1.514710376 | 0.205921 | -7.355778 | 1.90E-13 | 2.25E-12 |
| 3798  | ASGR2     | 30.62382078 | -1.51531897  | 0.276778 | -5.474859 | 4.38E-08 | 2.26E-07 |
| 6915  | AMH       | 9.763911905 | -1.515350031 | 0.392862 | -3.857204 | 0.000115 | 0.000325 |
| 544   | SRM       | 1013.003296 | -1.515619176 | 0.159922 | -9.477253 | 2.61E-21 | 9.41E-20 |
| 11363 | CARD17    | 0.329516103 | -1.515759967 | 0.700821 | -2.162836 | 0.030554 | 0.052705 |
| 1205  | PSMB10    | 1671.56965  | -1.51596361  | 0.18928  | -8.009095 | 1.16E-15 | 1.88E-14 |
| 4930  | CORO2B    | 134.4684383 | -1.516482715 | 0.3152   | -4.811172 | 1.50E-06 | 5.97E-06 |
| 663   | HCK       | 562.8685496 | -1.516989146 | 0.166196 | -9.127722 | 7.00E-20 | 2.07E-18 |
| 1209  | LY86      | 279.946511  | -1.517061151 | 0.189561 | -8.003021 | 1.21E-15 | 1.97E-14 |
| 12690 | KLF14     | 0.308074224 | -1.517284576 | 0.872756 | -1.738499 | 0.082123 | 0.126847 |
| 1133  | TGFB3     | 503.5488026 | -1.518100135 | 0.187134 | -8.112354 | 4.96E-16 | 8.60E-15 |
| 2514  | COL12A1   | 1917.814768 | -1.518118096 | 0.235365 | -6.450071 | 1.12E-10 | 8.72E-10 |
| 8987  | FOLH1B    | 11.86620126 | -1.518763732 | 0.503052 | -3.019097 | 0.002535 | 0.00553  |
| 1756  | CD300LF   | 109.8017153 | -1.519478214 | 0.209924 | -7.238218 | 4.55E-13 | 5.07E-12 |
| 10371 | FADS6     | 1.908252784 | -1.519548952 | 0.603963 | -2.515962 | 0.011871 | 0.022436 |
| 7034  | RELN      | 74.57941861 | -1.519975274 | 0.399359 | -3.80604  | 0.000141 | 0.000393 |
| 4278  | METRN     | 297.8663168 | -1.520125291 | 0.294161 | -5.167658 | 2.37E-07 | 1.09E-06 |
| 778   | FAM113B   | 216.3948524 | -1.520331945 | 0.172401 | -8.818599 | 1.16E-18 | 2.92E-17 |
| 4045  | CLEC4E    | 133.246476  | -1.520781104 | 0.286482 | -5.308469 | 1.11E-07 | 5.36E-07 |
| 7021  | HIST1H1D  | 1.935349612 | -1.521211711 | 0.398766 | -3.814798 | 0.000136 | 0.000381 |
| 1803  | SKA3      | 57.66613656 | -1.521831062 | 0.211737 | -7.187371 | 6.61E-13 | 7.18E-12 |
| 2023  | LYL1      | 142.2703743 | -1.522113153 | 0.219467 | -6.935514 | 4.05E-12 | 3.92E-11 |
| 2472  | CXCR6     | 154.8919766 | -1.523294662 | 0.234458 | -6.497088 | 8.19E-11 | 6.49E-10 |
| 9772  | SLC28A3   | 1.060742258 | -1.524087611 | 0.559438 | -2.72432  | 0.006443 | 0.012923 |
| 3274  | BUB1      | 176.2232146 | -1.524554622 | 0.261389 | -5.832516 | 5.46E-09 | 3.27E-08 |
| 6315  | HBA2      | 2710.407024 | -1.524747047 | 0.370241 | -4.118257 | 3.82E-05 | 0.000118 |
| 1055  | C21orf7   | 593.6332612 | -1.524793899 | 0.185143 | -8.235761 | 1.78E-16 | 3.31E-15 |
| 7677  | C21orf96  | 0.931571262 | -1.525133018 | 0.429865 | -3.547935 | 0.000388 | 0.000991 |
| 2530  | SLAMF1    | 39.7635956  | -1.525722285 | 0.236957 | -6.43881  | 1.20E-10 | 9.33E-10 |
| 700   | PPP1R14B  | 1252.521958 | -1.526842883 | 0.169216 | -9.023066 | 1.83E-19 | 5.12E-18 |
| 2156  | MS4A4A    | 575.4522605 | -1.527770173 | 0.224498 | -6.805287 | 1.01E-11 | 9.17E-11 |
| 3352  | LC22A18A  | 73.63278139 | -1.528072422 | 0.264422 | -5.778909 | 7.52E-09 | 4.40E-08 |
| 1241  | KCNS3     | 469.8881472 | -1.528520512 | 0.19253  | -7.939136 | 2.04E-15 | 3.22E-14 |
| 2210  | FLJ23867  | 604.4807767 | -1.528843923 | 0.226645 | -6.745549 | 1.52E-11 | 1.35E-10 |
| 4294  | PADI2     | 382.623394  | -1.529649399 | 0.296461 | -5.159692 | 2.47E-07 | 1.13E-06 |
| 1274  | ACTA2     | 10200.99702 | -1.530365773 | 0.193829 | -7.895429 | 2.89E-15 | 4.45E-14 |
| 2876  | HMMR      | 120.8330365 | -1.53087542  | 0.249926 | -6.125307 | 9.05E-10 | 6.17E-09 |
| 2926  | DLX5      | 50.36339103 | -1.530887409 | 0.251252 | -6.093036 | 1.11E-09 | 7.42E-09 |
| 1191  | ITGB2     | 3201.188403 | -1.530935437 | 0.190733 | -8.026601 | 1.00E-15 | 1.65E-14 |
| 10777 | HCN1      | 1.507552368 | -1.530943717 | 0.645368 | -2.372202 | 0.017682 | 0.03216  |
| 6571  | SPIN2A    | 2.117233468 | -1.531313363 | 0.383409 | -3.993944 | 6.50E-05 | 0.000194 |
| 4404  | KCNJ5     | 135.3046199 | -1.53171591  | 0.300251 | -5.101448 | 3.37E-07 | 1.50E-06 |
| 2681  | CENPM     | 80.8900949  | -1.532125756 | 0.243333 | -6.296407 | 3.05E-10 | 2.23E-09 |
| 3003  | EPHX3     | 43.51621151 | -1.533395245 | 0.254245 | -6.031182 | 1.63E-09 | 1.06E-08 |
| 656   | PILRA     | 263.9669991 | -1.53343798  | 0.167465 | -9.156761 | 5.35E-20 | 1.60E-18 |
| 7318  | C20orf103 | 48.07267081 | -1.533497459 | 0.415281 | -3.692678 | 0.000222 | 0.000594 |
| 4344  | C2orf48   | 3.913921028 | -1.534136698 | 0.298747 | -5.135243 | 2.82E-07 | 1.27E-06 |

|       |           |             |              |          |           |          |          |
|-------|-----------|-------------|--------------|----------|-----------|----------|----------|
| 1120  | E2F2      | 44.46836456 | -1.534693682 | 0.188813 | -8.128101 | 4.36E-16 | 7.63E-15 |
| 3490  | AG2       | 1019.552012 | -1.535140076 | 0.270177 | -5.68197  | 1.33E-08 | 7.48E-08 |
| 6116  | H2AFB1    | 1.907914264 | -1.535870428 | 0.364575 | -4.212765 | 2.52E-05 | 8.08E-05 |
| 11184 | LHX8      | 5.939497232 | -1.536344592 | 0.68995  | -2.226747 | 0.025964 | 0.045505 |
| 2520  | SULF1     | 2774.346191 | -1.536479975 | 0.238356 | -6.446162 | 1.15E-10 | 8.92E-10 |
| 10438 | NMUR2     | 0.964135067 | -1.536583761 | 0.615098 | -2.498114 | 0.012486 | 0.023444 |
| 1725  | UNC13D    | 269.7848688 | -1.537953694 | 0.211526 | -7.270746 | 3.58E-13 | 4.06E-12 |
| 1545  | CDC42EP5  | 112.591006  | -1.538838142 | 0.205182 | -7.499881 | 6.39E-14 | 8.10E-13 |
| 12448 | NPFFR1    | 0.45142773  | -1.539015043 | 0.845236 | -1.820812 | 0.068635 | 0.108075 |
| 3925  | OPN1SW    | 1.939257688 | -1.539134954 | 0.28573  | -5.386684 | 7.18E-08 | 3.58E-07 |
| 8807  | LOC283731 | 1.461722571 | -1.539354555 | 0.499073 | -3.084428 | 0.002039 | 0.004539 |
| 7915  | PNCK      | 2734.265116 | -1.539828449 | 0.447198 | -3.443284 | 0.000575 | 0.001423 |
| 7250  | HRNBP3    | 2.451523645 | -1.540041335 | 0.413418 | -3.725143 | 0.000195 | 0.000528 |
| 632   | CD4       | 2182.274737 | -1.540267907 | 0.167345 | -9.204159 | 3.44E-20 | 1.07E-18 |
| 4919  | IL22RA1   | 174.5805164 | -1.540384695 | 0.319713 | -4.818018 | 1.45E-06 | 5.78E-06 |
| 10694 | ARL14     | 7.698231208 | -1.542184069 | 0.642771 | -2.399273 | 0.016428 | 0.030107 |
| 2421  | SNHG3     | 54.16057972 | -1.542207956 | 0.235803 | -6.540228 | 6.14E-11 | 4.97E-10 |
| 14858 | SPRR2E    | 0.359260343 | -1.54311898  | 1.469098 | -1.050385 | 0.293541 | 0.387262 |
| 1925  | ORC1L     | 44.55522961 | -1.54413584  | 0.218709 | -7.060239 | 1.66E-12 | 1.69E-11 |
| 36    | GLT25D1   | 3439.995179 | -1.544257073 | 0.114611 | -13.47388 | 2.23E-41 | 1.21E-38 |
| 1941  | STK32C    | 130.1466124 | -1.545280936 | 0.219441 | -7.041885 | 1.90E-12 | 1.92E-11 |
| 3710  | MLLT11    | 205.1673166 | -1.545528812 | 0.279396 | -5.531686 | 3.17E-08 | 1.68E-07 |
| 8333  | SPINK1    | 48.35490833 | -1.546327455 | 0.471561 | -3.27917  | 0.001041 | 0.002449 |
| 4659  | POM121L91 | 11.9370973  | -1.547633232 | 0.312285 | -4.955841 | 7.20E-07 | 3.03E-06 |
| 1419  | C13orf18  | 89.09206855 | -1.54811199  | 0.201612 | -7.67867  | 1.61E-14 | 2.22E-13 |
| 3717  | VPREB3    | 10.21599952 | -1.548664171 | 0.280179 | -5.527409 | 3.25E-08 | 1.71E-07 |
| 2544  | SNAI1     | 218.0979403 | -1.54924006  | 0.240997 | -6.428469 | 1.29E-10 | 9.93E-10 |
| 928   | C5AR1     | 600.5426385 | -1.54948585  | 0.182716 | -8.48028  | 2.25E-17 | 4.75E-16 |
| 11471 | TBC1D3G   | 26.62858456 | -1.550784534 | 0.728555 | -2.128576 | 0.033289 | 0.056883 |
| 8578  | FAM180B   | 0.872770656 | -1.553031321 | 0.48831  | -3.180418 | 0.001471 | 0.00336  |
| 4850  | SLC7A5    | 2497.294875 | -1.553229765 | 0.31923  | -4.865553 | 1.14E-06 | 4.61E-06 |
| 1612  | IME1-NME  | 80.07705378 | -1.553388316 | 0.209617 | -7.410601 | 1.26E-13 | 1.53E-12 |
| 5455  | CCDC64B   | 159.357968  | -1.553611682 | 0.342186 | -4.540249 | 5.62E-06 | 2.02E-05 |
| 7158  | STK31     | 2.334638866 | -1.554427718 | 0.41333  | -3.760742 | 0.000169 | 0.000464 |
| 6920  | GOLGA9P   | 12.99545824 | -1.554593779 | 0.403097 | -3.856627 | 0.000115 | 0.000326 |
| 11919 | GRIN1     | 1.555587809 | -1.554720902 | 0.784305 | -1.982292 | 0.047447 | 0.07802  |
| 1006  | RPL13     | 25706.3349  | -1.554829671 | 0.186475 | -8.338016 | 7.55E-17 | 1.47E-15 |
| 13422 | SSX6      | 0.383581316 | -1.555589893 | 1.031889 | -1.507516 | 0.131678 | 0.192298 |
| 1271  | STAB1     | 3222.527863 | -1.555714684 | 0.196938 | -7.899497 | 2.80E-15 | 4.32E-14 |
| 186   | TACC3     | 392.642642  | -1.555872412 | 0.137135 | -11.34553 | 7.81E-30 | 8.23E-28 |
| 9973  | OC1001280 | 3.986274401 | -1.556175584 | 0.584471 | -2.662539 | 0.007755 | 0.015242 |
| 2029  | BST2      | 3397.316715 | -1.556642512 | 0.224639 | -6.929532 | 4.22E-12 | 4.08E-11 |
| 8251  | DIO3      | 11.7545859  | -1.556711994 | 0.469871 | -3.313063 | 0.000923 | 0.002192 |
| 75    | CTSZ      | 8068.996228 | -1.556871457 | 0.123791 | -12.57657 | 2.84E-36 | 7.42E-34 |
| 422   | GPR132    | 132.245351  | -1.556909936 | 0.156365 | -9.956894 | 2.35E-23 | 1.09E-21 |
| 4139  | PREX2     | 508.216289  | -1.556926993 | 0.296002 | -5.259848 | 1.44E-07 | 6.83E-07 |
| 8600  | TM4SF4    | 29.74880703 | -1.558805957 | 0.490981 | -3.174881 | 0.001499 | 0.003416 |



|       |           |             |              |          |           |          |          |
|-------|-----------|-------------|--------------|----------|-----------|----------|----------|
| 12290 | MGAT4C    | 0.712984709 | -1.559624979 | 0.834617 | -1.868672 | 0.061669 | 0.098356 |
| 3288  | ANXA2P3   | 4.752696421 | -1.5601386   | 0.267934 | -5.822853 | 5.79E-09 | 3.45E-08 |
| 969   | TRIP13    | 153.0492189 | -1.56016573  | 0.18569  | -8.401973 | 4.39E-17 | 8.88E-16 |
| 1963  | MELK      | 97.89274    | -1.560612811 | 0.222445 | -7.015731 | 2.29E-12 | 2.28E-11 |
| 1839  | SLC2A1    | 7902.225142 | -1.561573724 | 0.21844  | -7.148753 | 8.76E-13 | 9.33E-12 |
| 4491  | C1QTNF4   | 4.887519027 | -1.562368879 | 0.309646 | -5.045669 | 4.52E-07 | 1.97E-06 |
| 3501  | MMP28     | 105.2448499 | -1.562761635 | 0.275464 | -5.673197 | 1.40E-08 | 7.85E-08 |
| 14273 | SPACA3    | 0.295758254 | -1.563928779 | 1.265273 | -1.23604  | 0.216444 | 0.29724  |
| 734   | CYTH4     | 527.7757053 | -1.565368247 | 0.175316 | -8.92882  | 4.31E-19 | 1.15E-17 |
| 9875  | FOXA2     | 30.58427276 | -1.565462581 | 0.58071  | -2.695772 | 0.007023 | 0.013939 |
| 4923  | CTXN1     | 71.72965023 | -1.565479071 | 0.325056 | -4.81603  | 1.46E-06 | 5.83E-06 |
| 1342  | RHEBL1    | 17.1089736  | -1.566697451 | 0.200677 | -7.80707  | 5.85E-15 | 8.55E-14 |
| 10916 | SERPINB5  | 1.280415763 | -1.567710732 | 0.677482 | -2.314025 | 0.020666 | 0.037109 |
| 2408  | MYOZ3     | 22.92248836 | -1.567721412 | 0.239304 | -6.551172 | 5.71E-11 | 4.65E-10 |
| 2921  | DC1001446 | 9.745873506 | -1.568479013 | 0.257302 | -6.095871 | 1.09E-09 | 7.30E-09 |
| 2741  | CENPI     | 17.61097681 | -1.569260961 | 0.251345 | -6.24345  | 4.28E-10 | 3.06E-09 |
| 3210  | RAET1K    | 3.722968799 | -1.569813338 | 0.267002 | -5.879406 | 4.12E-09 | 2.51E-08 |
| 216   | P4HB      | 32952.80672 | -1.570811028 | 0.142093 | -11.05478 | 2.08E-28 | 1.89E-26 |
| 472   | C17orf53  | 44.27878115 | -1.571442267 | 0.161432 | -9.73439  | 2.15E-22 | 8.93E-21 |
| 566   | SELPLG    | 724.0874559 | -1.571917893 | 0.16699  | -9.413243 | 4.81E-21 | 1.67E-19 |
| 2443  | TBC1D3B   | 190.4550332 | -1.571988937 | 0.241263 | -6.515662 | 7.24E-11 | 5.81E-10 |
| 9456  | CES4      | 3.038545229 | -1.57268323  | 0.55454  | -2.836013 | 0.004568 | 0.009469 |
| 2140  | LOC92659  | 45.37476297 | -1.572905285 | 0.230837 | -6.813931 | 9.50E-12 | 8.70E-11 |
| 4898  | WNT10A    | 30.36227481 | -1.573505557 | 0.325919 | -4.827904 | 1.38E-06 | 5.52E-06 |
| 3157  | LTBP2     | 1787.59335  | -1.573594544 | 0.266134 | -5.912798 | 3.36E-09 | 2.09E-08 |
| 8063  | CASKIN1   | 3.437720989 | -1.573751404 | 0.464586 | -3.387425 | 0.000706 | 0.001715 |
| 7553  | MAP7D2    | 1117.114323 | -1.573902389 | 0.437879 | -3.594379 | 0.000325 | 0.000844 |
| 13400 | C1orf94   | 0.298698481 | -1.574181154 | 1.041192 | -1.511903 | 0.130559 | 0.190971 |
| 4505  | ENKUR     | 39.7220688  | -1.574988974 | 0.312883 | -5.033796 | 4.81E-07 | 2.09E-06 |
| 1489  | C1orf162  | 543.9168134 | -1.575699151 | 0.207702 | -7.586357 | 3.29E-14 | 4.33E-13 |
| 3337  | CD84      | 240.8072868 | -1.576471144 | 0.272112 | -5.793462 | 6.90E-09 | 4.05E-08 |
| 2534  | NEIL3     | 23.22522583 | -1.576689997 | 0.245036 | -6.434512 | 1.24E-10 | 9.58E-10 |
| 3701  | DEPDC1    | 86.80860773 | -1.577318774 | 0.284951 | -5.53541  | 3.11E-08 | 1.64E-07 |
| 3946  | BCL2L14   | 3.315829028 | -1.577387833 | 0.293347 | -5.377211 | 7.56E-08 | 3.76E-07 |
| 235   | PDIA4     | 6851.119109 | -1.577673746 | 0.144068 | -10.95086 | 6.58E-28 | 5.49E-26 |
| 1437  | SIGLEC9   | 104.3851913 | -1.579770116 | 0.206523 | -7.64936  | 2.02E-14 | 2.76E-13 |
| 4037  | CMTM2     | 6.987919903 | -1.581229855 | 0.297599 | -5.313288 | 1.08E-07 | 5.23E-07 |
| 4013  | CLDN11    | 62.49011304 | -1.58133817  | 0.296631 | -5.330998 | 9.77E-08 | 4.77E-07 |
| 3311  | BHLHE22   | 19.88305495 | -1.58163926  | 0.27225  | -5.809501 | 6.27E-09 | 3.71E-08 |
| 4646  | ZDHHC8P1  | 25.03825729 | -1.58211423  | 0.318716 | -4.964021 | 6.90E-07 | 2.91E-06 |
| 411   | SH3BP1    | 245.7053947 | -1.582143115 | 0.158133 | -10.00516 | 1.45E-23 | 6.90E-22 |
| 996   | ITGA3     | 7461.624433 | -1.583129179 | 0.189478 | -8.355201 | 6.53E-17 | 1.29E-15 |
| 5818  | FCRL1     | 4.349866367 | -1.584736611 | 0.363127 | -4.364142 | 1.28E-05 | 4.30E-05 |
| 13247 | FAM75A2   | 0.393100652 | -1.585094149 | 1.013744 | -1.563604 | 0.117911 | 0.174467 |
| 13313 | NPPB      | 0.577533032 | -1.585374563 | 1.03016  | -1.53896  | 0.123814 | 0.182294 |
| 1247  | DFNA5     | 750.572253  | -1.585396943 | 0.199837 | -7.933432 | 2.13E-15 | 3.35E-14 |
| 3332  | SLC7A2    | 2283.323477 | -1.585419404 | 0.273573 | -5.79523  | 6.82E-09 | 4.01E-08 |

|       |           |             |              |          |           |          |          |
|-------|-----------|-------------|--------------|----------|-----------|----------|----------|
| 1716  | ZNF579    | 251.6977455 | -1.585637203 | 0.217731 | -7.282542 | 3.28E-13 | 3.74E-12 |
| 13481 | ABCB11    | 0.347909723 | -1.585798614 | 1.06119  | -1.494359 | 0.135082 | 0.196405 |
| 1275  | VAV1      | 271.4050473 | -1.585952627 | 0.200884 | -7.894885 | 2.91E-15 | 4.47E-14 |
| 708   | NPEPL1    | 1659.522842 | -1.587176817 | 0.176578 | -8.988542 | 2.51E-19 | 6.94E-18 |
| 5268  | IGSF10    | 16.3722129  | -1.588697277 | 0.342155 | -4.643204 | 3.43E-06 | 1.28E-05 |
| 9236  | TREML4    | 1.52655266  | -1.588743266 | 0.543067 | -2.925501 | 0.003439 | 0.007298 |
| 13743 | SFTPA1    | 0.325204926 | -1.58906692  | 1.131786 | -1.404035 | 0.160308 | 0.22864  |
| 13903 | SERPINA1  | 0.324825031 | -1.589436094 | 1.179015 | -1.348106 | 0.177624 | 0.250429 |
| 14295 | HAND1     | 0.418756246 | -1.590130029 | 1.292256 | -1.230507 | 0.218507 | 0.299612 |
| 1592  | EFNA3     | 147.8450429 | -1.591266589 | 0.214101 | -7.432317 | 1.07E-13 | 1.31E-12 |
| 4618  | MUC1      | 2354.420557 | -1.592088208 | 0.319605 | -4.981431 | 6.31E-07 | 2.68E-06 |
| 7754  | AQP8      | 0.823044594 | -1.592478502 | 0.452695 | -3.517777 | 0.000435 | 0.0011   |
| 973   | MX2       | 363.925428  | -1.592942051 | 0.189871 | -8.389591 | 4.88E-17 | 9.83E-16 |
| 4154  | WNT1      | 2.607000063 | -1.593682333 | 0.303572 | -5.249768 | 1.52E-07 | 7.19E-07 |
| 2439  | MAP4K1    | 169.9210789 | -1.594572689 | 0.244533 | -6.520899 | 6.99E-11 | 5.62E-10 |
| 7974  | HBE1      | 1.233592706 | -1.595263231 | 0.466442 | -3.420069 | 0.000626 | 0.001539 |
| 5008  | TLE6      | 25.66314276 | -1.595295072 | 0.334514 | -4.768992 | 1.85E-06 | 7.25E-06 |
| 11044 | WIF1      | 1.16513136  | -1.595646734 | 0.701423 | -2.27487  | 0.022914 | 0.040668 |
| 8373  | CALHM1    | 0.658023728 | -1.595977569 | 0.489446 | -3.260782 | 0.001111 | 0.002601 |
| 376   | SLC15A3   | 876.0495661 | -1.596867504 | 0.157548 | -10.13574 | 3.83E-24 | 2.00E-22 |
| 7068  | MMP17     | 44.54732842 | -1.596880583 | 0.42075  | -3.795323 | 0.000147 | 0.000409 |
| 6993  | MEOX2     | 83.30987053 | -1.597453327 | 0.417408 | -3.827076 | 0.00013  | 0.000363 |
| 4776  | PTGS1     | 1849.71468  | -1.599128547 | 0.3266   | -4.896284 | 9.77E-07 | 4.01E-06 |
| 4287  | OLFM2     | 139.8709443 | -1.599875941 | 0.309878 | -5.16292  | 2.43E-07 | 1.11E-06 |
| 2124  | BUB1B     | 104.3010718 | -1.600106544 | 0.234418 | -6.825872 | 8.74E-12 | 8.06E-11 |
| 1611  | CENPF     | 401.67354   | -1.60087324  | 0.216022 | -7.410706 | 1.26E-13 | 1.53E-12 |
| 3183  | SIGLEC14  | 83.40339984 | -1.601698055 | 0.271804 | -5.892847 | 3.80E-09 | 2.34E-08 |
| 209   | S100A11   | 7874.232928 | -1.602659224 | 0.143854 | -11.14085 | 7.94E-29 | 7.44E-27 |
| 7325  | HBA1      | 735.0302524 | -1.602831188 | 0.434333 | -3.690325 | 0.000224 | 0.000599 |
| 1634  | CSF3R     | 349.9839772 | -1.603362322 | 0.217185 | -7.382467 | 1.55E-13 | 1.86E-12 |
| 4431  | SULT1A2   | 35.48305046 | -1.60356915  | 0.315471 | -5.083096 | 3.71E-07 | 1.64E-06 |
| 1792  | DC1002332 | 39.55222132 | -1.604356649 | 0.222921 | -7.19698  | 6.16E-13 | 6.73E-12 |
| 731   | RPS19     | 16846.77585 | -1.604688581 | 0.179469 | -8.941327 | 3.85E-19 | 1.03E-17 |
| 7916  | DSC3      | 4.608998411 | -1.604794709 | 0.466274 | -3.441741 | 0.000578 | 0.001431 |
| 2257  | ANKRD13F  | 116.5946334 | -1.604908522 | 0.239904 | -6.689787 | 2.23E-11 | 1.94E-10 |
| 8702  | SPINK2    | 2.618276168 | -1.604943837 | 0.512987 | -3.128622 | 0.001756 | 0.003956 |
| 7124  | MUC13     | 92.3749073  | -1.605240996 | 0.424993 | -3.777098 | 0.000159 | 0.000437 |
| 818   | CCNB1     | 361.4942225 | -1.605897669 | 0.184285 | -8.714184 | 2.93E-18 | 7.01E-17 |
| 355   | RBCK1     | 3614.67831  | -1.606324292 | 0.156689 | -10.2517  | 1.16E-24 | 6.42E-23 |
| 8089  | POM121L8I | 1.097550221 | -1.606506228 | 0.476069 | -3.374522 | 0.000739 | 0.001792 |
| 1063  | WDR62     | 50.74153247 | -1.606565976 | 0.195439 | -8.220274 | 2.03E-16 | 3.74E-15 |
| 8377  | PRKY      | 109.8985662 | -1.607667693 | 0.493306 | -3.258968 | 0.001118 | 0.002616 |
| 14975 | SP9       | 0.399574448 | -1.607916988 | 1.584315 | -1.014897 | 0.310155 | 0.405966 |
| 1938  | LFNG      | 400.8222021 | -1.607994551 | 0.228248 | -7.044937 | 1.86E-12 | 1.88E-11 |
| 8453  | ABCA13    | 5.512611294 | -1.608305241 | 0.498368 | -3.227143 | 0.00125  | 0.002899 |
| 9810  | MPPED1    | 0.738509974 | -1.608433276 | 0.592685 | -2.713807 | 0.006651 | 0.01329  |
| 4978  | KRTCAP3   | 150.7134019 | -1.609672882 | 0.336468 | -4.78403  | 1.72E-06 | 6.77E-06 |

|       |          |             |              |          |           |          |          |
|-------|----------|-------------|--------------|----------|-----------|----------|----------|
| 3652  | TBX15    | 216.4614022 | -1.609784208 | 0.288987 | -5.57044  | 2.54E-08 | 1.36E-07 |
| 5618  | GSTM5    | 52.96674853 | -1.610023184 | 0.360692 | -4.46371  | 8.06E-06 | 2.81E-05 |
| 417   | LGALS3BF | 13647.66796 | -1.610264956 | 0.161472 | -9.972405 | 2.01E-23 | 9.46E-22 |
| 1371  | POU2F2   | 147.1365632 | -1.611344379 | 0.207544 | -7.763851 | 8.24E-15 | 1.18E-13 |
| 1753  | LY96     | 232.953417  | -1.611816119 | 0.222588 | -7.241251 | 4.45E-13 | 4.97E-12 |
| 10305 | INSM2    | 0.421570088 | -1.612061274 | 0.633777 | -2.543579 | 0.010972 | 0.02087  |
| 1149  | SLC37A2  | 375.0978567 | -1.612617881 | 0.199371 | -8.088517 | 6.04E-16 | 1.03E-14 |
| 2761  | PRDM8    | 46.65665216 | -1.612716162 | 0.258892 | -6.229307 | 4.69E-10 | 3.33E-09 |
| 5861  | CXCL3    | 19.28171068 | -1.613229574 | 0.371631 | -4.340939 | 1.42E-05 | 4.74E-05 |
| 2020  | ISG15    | 898.6272136 | -1.615796178 | 0.232889 | -6.938044 | 3.98E-12 | 3.86E-11 |
| 1333  | CD248    | 1633.140841 | -1.61599736  | 0.206696 | -7.818248 | 5.36E-15 | 7.88E-14 |
| 1211  | LYPD3    | 19.71046914 | -1.616196673 | 0.201991 | -8.001335 | 1.23E-15 | 1.99E-14 |
| 113   | LEPRE1   | 1097.471427 | -1.617999115 | 0.132968 | -12.16837 | 4.58E-34 | 7.95E-32 |
| 426   | NFKBIL2  | 123.392728  | -1.618645863 | 0.162939 | -9.934044 | 2.96E-23 | 1.36E-21 |
| 1723  | PTPN7    | 247.4864321 | -1.61899691  | 0.222633 | -7.272041 | 3.54E-13 | 4.03E-12 |
| 5984  | C1orf61  | 2.48752778  | -1.620166933 | 0.378899 | -4.275985 | 1.90E-05 | 6.23E-05 |
| 3606  | PLAC2    | 9.575499886 | -1.62138876  | 0.289337 | -5.603806 | 2.10E-08 | 1.14E-07 |
| 1967  | C9orf16  | 696.7838455 | -1.621932328 | 0.231326 | -7.011462 | 2.36E-12 | 2.35E-11 |
| 2456  | C16orf59 | 27.94426445 | -1.621982711 | 0.249198 | -6.508807 | 7.57E-11 | 6.05E-10 |
| 8535  | NEFM     | 60.41713769 | -1.622046978 | 0.507897 | -3.193654 | 0.001405 | 0.003226 |
| 2631  | ACAP1    | 206.0089976 | -1.623329395 | 0.255893 | -6.343786 | 2.24E-10 | 1.67E-09 |
| 1183  | CYP2S1   | 61.22622069 | -1.623932756 | 0.201845 | -8.045456 | 8.59E-16 | 1.42E-14 |
| 1261  | 44079    | 528.1706419 | -1.624100815 | 0.205238 | -7.913271 | 2.51E-15 | 3.90E-14 |
| 6331  | WNT16    | 2.845439157 | -1.625008474 | 0.395117 | -4.112724 | 3.91E-05 | 0.000121 |
| 1137  | SLCO2B1  | 2537.218923 | -1.62542446  | 0.200472 | -8.107994 | 5.15E-16 | 8.87E-15 |
| 5547  | C22orf41 | 6.668148415 | -1.62577738  | 0.361318 | -4.499576 | 6.81E-06 | 2.41E-05 |
| 283   | FHL3     | 406.4100896 | -1.626653473 | 0.152686 | -10.65359 | 1.68E-26 | 1.16E-24 |
| 6699  | UCHL1    | 764.7858863 | -1.626869262 | 0.412759 | -3.941453 | 8.10E-05 | 0.000237 |
| 10854 | C16orf73 | 4.153737078 | -1.627339288 | 0.695896 | -2.338479 | 0.019362 | 0.034966 |
| 2444  | KIF15    | 40.6757851  | -1.627815544 | 0.249849 | -6.515185 | 7.26E-11 | 5.82E-10 |
| 3961  | LAX1     | 60.83717802 | -1.628154746 | 0.303209 | -5.369749 | 7.88E-08 | 3.90E-07 |
| 360   | EMP3     | 1435.782769 | -1.628220395 | 0.159125 | -10.23233 | 1.42E-24 | 7.74E-23 |
| 6199  | PTGDS    | 387.3393702 | -1.628443781 | 0.389905 | -4.176516 | 2.96E-05 | 9.36E-05 |
| 10618 | KIAA1486 | 0.663523055 | -1.632053836 | 0.672211 | -2.427891 | 0.015187 | 0.028035 |
| 3660  | HAR1A    | 11.50432236 | -1.6322052   | 0.293383 | -5.563393 | 2.65E-08 | 1.42E-07 |
| 8582  | RCVRN    | 0.52628516  | -1.632929341 | 0.513549 | -3.179697 | 0.001474 | 0.003367 |
| 295   | RGS10    | 514.1634064 | -1.634469626 | 0.154428 | -10.58401 | 3.53E-26 | 2.35E-24 |
| 1118  | PAQR4    | 390.3454602 | -1.634499361 | 0.200881 | -8.136651 | 4.06E-16 | 7.12E-15 |
| 1552  | HSD3B7   | 3296.314271 | -1.635953011 | 0.218457 | -7.48868  | 6.96E-14 | 8.79E-13 |
| 6361  | ADAM33   | 13.87896381 | -1.638857911 | 0.400089 | -4.096238 | 4.20E-05 | 0.000129 |
| 291   | SERPINH1 | 6865.11464  | -1.639538434 | 0.154458 | -10.61476 | 2.54E-26 | 1.71E-24 |
| 2075  | S100A3   | 50.27516272 | -1.639594638 | 0.238486 | -6.87502  | 6.20E-12 | 5.85E-11 |
| 3129  | TREML1   | 4.779513575 | -1.642511146 | 0.276415 | -5.9422   | 2.81E-09 | 1.76E-08 |
| 2093  | CCDC74A  | 280.4267247 | -1.642963186 | 0.239744 | -6.852997 | 7.23E-12 | 6.77E-11 |
| 670   | RPL28    | 12953.55849 | -1.643963963 | 0.18066  | -9.09978  | 9.05E-20 | 2.65E-18 |
| 14616 | KRT77    | 0.313399143 | -1.644114423 | 1.458265 | -1.127445 | 0.259554 | 0.348055 |
| 5615  | SLC22A1  | 9.578183978 | -1.644232307 | 0.368214 | -4.465426 | 7.99E-06 | 2.79E-05 |

|       |           |             |              |          |           |          |          |
|-------|-----------|-------------|--------------|----------|-----------|----------|----------|
| 3483  | KRT80     | 348.6585479 | -1.645450732 | 0.289388 | -5.68597  | 1.30E-08 | 7.32E-08 |
| 6294  | TGM3      | 3.697167457 | -1.646721332 | 0.398779 | -4.129406 | 3.64E-05 | 0.000113 |
| 1091  | NCKAP1L   | 825.7244237 | -1.646931387 | 0.201507 | -8.173083 | 3.01E-16 | 5.40E-15 |
| 6433  | KCND3     | 13.5460236  | -1.64763402  | 0.406221 | -4.056005 | 4.99E-05 | 0.000152 |
| 9788  | C3orf66   | 12.41497263 | -1.647932467 | 0.605854 | -2.720016 | 0.006528 | 0.013072 |
| 2301  | GGT5      | 912.9598342 | -1.648130355 | 0.247643 | -6.655277 | 2.83E-11 | 2.41E-10 |
| 2846  | SLC2A14   | 83.12582656 | -1.648791937 | 0.268216 | -6.147248 | 7.88E-10 | 5.43E-09 |
| 10621 | NTF4      | 0.464984056 | -1.649399065 | 0.679755 | -2.426461 | 0.015247 | 0.028138 |
| 12522 | MAGEA6    | 0.568056476 | -1.649531609 | 0.917662 | -1.797538 | 0.07225  | 0.113095 |
| 5874  | PPBP      | 8.442661716 | -1.650408601 | 0.380721 | -4.334961 | 1.46E-05 | 4.86E-05 |
| 1032  | CD101     | 47.78997213 | -1.650488938 | 0.199337 | -8.279906 | 1.23E-16 | 2.34E-15 |
| 730   | CYBA      | 3126.61243  | -1.651611589 | 0.184716 | -8.941345 | 3.84E-19 | 1.03E-17 |
| 3720  | VGLL3     | 160.0024974 | -1.651987281 | 0.299013 | -5.524806 | 3.30E-08 | 1.74E-07 |
| 6815  | CCNO      | 24.45992471 | -1.652039561 | 0.42433  | -3.893294 | 9.89E-05 | 0.000284 |
| 244   | LIMK1     | 1044.86292  | -1.652170495 | 0.151364 | -10.91522 | 9.75E-28 | 7.83E-26 |
| 1223  | CDKN3     | 65.49841763 | -1.652276635 | 0.206797 | -7.989837 | 1.35E-15 | 2.17E-14 |
| 9333  | APOH      | 45.35036327 | -1.652989946 | 0.572995 | -2.884824 | 0.003916 | 0.008225 |
| 11268 | OBP2A     | 0.382174862 | -1.653622714 | 0.754166 | -2.192651 | 0.028333 | 0.049285 |
| 2273  | CNIH2     | 8.456122483 | -1.655232903 | 0.247989 | -6.674628 | 2.48E-11 | 2.14E-10 |
| 2842  | HIST2H2AC | 5.058705986 | -1.655843192 | 0.269197 | -6.151056 | 7.70E-10 | 5.31E-09 |
| 11201 | TAC3      | 0.38388212  | -1.656546645 | 0.745824 | -2.221095 | 0.026344 | 0.046101 |
| 4355  | C2orf89   | 67.90419225 | -1.65779311  | 0.323229 | -5.128854 | 2.92E-07 | 1.31E-06 |
| 5279  | C20orf195 | 2.940790146 | -1.657807115 | 0.357584 | -4.636137 | 3.55E-06 | 1.32E-05 |
| 1708  | IL2RG     | 783.3549923 | -1.658393273 | 0.22753  | -7.288674 | 3.13E-13 | 3.59E-12 |
| 12495 | BTG4      | 0.361808895 | -1.65856548  | 0.918539 | -1.805656 | 0.070972 | 0.111326 |
| 7718  | MGC2889   | 1.517900429 | -1.660416081 | 0.469905 | -3.533518 | 0.00041  | 0.001041 |
| 643   | RAD51     | 52.7436721  | -1.660426989 | 0.180768 | -9.185424 | 4.10E-20 | 1.25E-18 |
| 1237  | ULBP2     | 44.33311715 | -1.66065434  | 0.208951 | -7.947589 | 1.90E-15 | 3.01E-14 |
| 6090  | RUNDC3A   | 70.87770803 | -1.660996496 | 0.393122 | -4.225143 | 2.39E-05 | 7.69E-05 |
| 5006  | TREX2     | 19.60892519 | -1.661371913 | 0.34833  | -4.769536 | 1.85E-06 | 7.23E-06 |
| 2763  | C1orf127  | 7.713132119 | -1.66213342  | 0.266983 | -6.225605 | 4.80E-10 | 3.40E-09 |
| 5700  | KCND2     | 11.9921035  | -1.662206411 | 0.376007 | -4.420683 | 9.84E-06 | 3.38E-05 |
| 3356  | CCL8      | 74.90014528 | -1.6626203   | 0.28793  | -5.774381 | 7.72E-09 | 4.51E-08 |
| 3204  | SDS       | 335.9624007 | -1.662774079 | 0.282695 | -5.88187  | 4.06E-09 | 2.48E-08 |
| 6196  | XCR1      | 7.023941513 | -1.663477629 | 0.398245 | -4.17702  | 2.95E-05 | 9.34E-05 |
| 2246  | PTAFR     | 148.6068438 | -1.663579183 | 0.248275 | -6.700537 | 2.08E-11 | 1.81E-10 |
| 2580  | HSH2D     | 75.62443182 | -1.663591995 | 0.259848 | -6.402171 | 1.53E-10 | 1.16E-09 |
| 3450  | C19orf36  | 31.4268156  | -1.663805445 | 0.291565 | -5.70647  | 1.15E-08 | 6.55E-08 |
| 2312  | STMN3     | 1893.825754 | -1.664488158 | 0.250503 | -6.644594 | 3.04E-11 | 2.58E-10 |
| 2573  | MATN1     | 5.062120033 | -1.664668282 | 0.259741 | -6.408952 | 1.47E-10 | 1.12E-09 |
| 299   | LRFN1     | 46.76977963 | -1.66676926  | 0.158033 | -10.54697 | 5.25E-26 | 3.44E-24 |
| 2998  | LOC653786 | 13.88115697 | -1.667141922 | 0.276335 | -6.033053 | 1.61E-09 | 1.05E-08 |
| 585   | AIF1      | 886.0540505 | -1.667151984 | 0.178058 | -9.362959 | 7.75E-21 | 2.60E-19 |
| 3545  | SIRPG     | 81.25658681 | -1.667332239 | 0.295634 | -5.639855 | 1.70E-08 | 9.41E-08 |
| 1789  | EXO1      | 48.84704544 | -1.668183803 | 0.231729 | -7.198858 | 6.07E-13 | 6.65E-12 |
| 2149  | CHST1     | 265.603355  | -1.668353784 | 0.245015 | -6.809196 | 9.81E-12 | 8.95E-11 |
| 668   | ARHGEF19  | 140.156634  | -1.668995903 | 0.183105 | -9.11497  | 7.87E-20 | 2.31E-18 |

|       |           |             |              |          |           |          |          |
|-------|-----------|-------------|--------------|----------|-----------|----------|----------|
| 4454  | FCGR3B    | 97.13912104 | -1.669827181 | 0.329368 | -5.069791 | 3.98E-07 | 1.75E-06 |
| 2466  | OXCT2     | 8.117033067 | -1.671248824 | 0.257018 | -6.502449 | 7.90E-11 | 6.28E-10 |
| 1188  | OC1002707 | 210.8771201 | -1.671329611 | 0.208181 | -8.028271 | 9.89E-16 | 1.63E-14 |
| 10639 | ADCY8     | 83.55354    | -1.671336933 | 0.690957 | -2.418871 | 0.015569 | 0.028683 |
| 3324  | SNHG9     | 31.38260578 | -1.671437398 | 0.288133 | -5.800918 | 6.60E-09 | 3.89E-08 |
| 5965  | CYP4F12   | 32.00642567 | -1.671560285 | 0.390144 | -4.284471 | 1.83E-05 | 6.02E-05 |
| 5500  | MSX2      | 30.32617581 | -1.671975574 | 0.369762 | -4.521757 | 6.13E-06 | 2.19E-05 |
| 1392  | FCGR3A    | 4314.826847 | -1.673280367 | 0.216574 | -7.726144 | 1.11E-14 | 1.56E-13 |
| 2416  | KIF14     | 56.35145366 | -1.673943189 | 0.255895 | -6.54153  | 6.09E-11 | 4.94E-10 |
| 5319  | DIO2      | 143.9925594 | -1.674115285 | 0.362946 | -4.612571 | 3.98E-06 | 1.47E-05 |
| 6063  | LRRN4     | 128.0165604 | -1.676094512 | 0.395414 | -4.238829 | 2.25E-05 | 7.26E-05 |
| 1103  | SERPING1  | 15179.4307  | -1.676274297 | 0.205526 | -8.156039 | 3.46E-16 | 6.15E-15 |
| 1720  | CCR10     | 29.23425549 | -1.677205374 | 0.230531 | -7.275409 | 3.45E-13 | 3.94E-12 |
| 1164  | LIMD2     | 521.196962  | -1.677209771 | 0.207874 | -8.068392 | 7.12E-16 | 1.20E-14 |
| 3973  | DNAJC5B   | 25.92319112 | -1.677421275 | 0.313086 | -5.35771  | 8.43E-08 | 4.16E-07 |
| 763   | CSF1R     | 2474.38009  | -1.678410414 | 0.189653 | -8.849914 | 8.76E-19 | 2.25E-17 |
| 11889 | KRT33B    | 0.605722696 | -1.680567611 | 0.843774 | -1.991728 | 0.046401 | 0.0765   |
| 8018  | MEM151A   | 9.42331153  | -1.681760754 | 0.493914 | -3.404964 | 0.000662 | 0.001617 |
| 4321  | TRIM17    | 10.41945379 | -1.682003078 | 0.326829 | -5.146437 | 2.65E-07 | 1.20E-06 |
| 8324  | GPR31     | 0.792113259 | -1.682814717 | 0.51269  | -3.282322 | 0.00103  | 0.002424 |
| 6554  | C1orf177  | 2.625042845 | -1.683220705 | 0.420262 | -4.00517  | 6.20E-05 | 0.000185 |
| 1249  | CD52      | 476.885928  | -1.684258956 | 0.212344 | -7.931751 | 2.16E-15 | 3.39E-14 |
| 1748  | CCDC88B   | 386.1669424 | -1.685302312 | 0.232557 | -7.246839 | 4.27E-13 | 4.78E-12 |
| 2333  | DLGAP5    | 85.46540246 | -1.686140894 | 0.254653 | -6.621327 | 3.56E-11 | 2.99E-10 |
| 11791 | GUCA1C    | 0.500165062 | -1.686214123 | 0.832803 | -2.024746 | 0.042893 | 0.071305 |
| 5203  | BTN1A1    | 1.752541886 | -1.688288804 | 0.361028 | -4.676341 | 2.92E-06 | 1.10E-05 |
| 3907  | NPFF      | 14.53325175 | -1.688349012 | 0.312755 | -5.39832  | 6.73E-08 | 3.37E-07 |
| 8747  | UGT1A7    | 12.52300795 | -1.689263493 | 0.543214 | -3.109759 | 0.001872 | 0.004196 |
| 8552  | BCORL2    | 3.027278081 | -1.689382776 | 0.529795 | -3.188748 | 0.001429 | 0.003275 |
| 3931  | LEF1      | 564.6924056 | -1.692209952 | 0.31434  | -5.383377 | 7.31E-08 | 3.65E-07 |
| 1678  | CD6       | 218.1349448 | -1.692796301 | 0.231102 | -7.324883 | 2.39E-13 | 2.79E-12 |
| 589   | COPZ2     | 347.0391071 | -1.693363035 | 0.180956 | -9.357872 | 8.14E-21 | 2.71E-19 |
| 10273 | C3orf20   | 1.686447434 | -1.693795088 | 0.662775 | -2.555613 | 0.0106   | 0.020225 |
| 3349  | MMP16     | 71.38513827 | -1.693882592 | 0.293016 | -5.780856 | 7.43E-09 | 4.35E-08 |
| 8951  | CYP2C18   | 6.735850237 | -1.694480279 | 0.558968 | -3.031444 | 0.002434 | 0.00533  |
| 4806  | RHCE      | 9.061292502 | -1.695109853 | 0.347045 | -4.884408 | 1.04E-06 | 4.23E-06 |
| 12264 | MSMB      | 0.555699497 | -1.695758913 | 0.9027   | -1.87854  | 0.060307 | 0.096386 |
| 2254  | KLHDC8A   | 48.39026374 | -1.695827614 | 0.253364 | -6.693252 | 2.18E-11 | 1.90E-10 |
| 3782  | MSC       | 1276.409678 | -1.697073352 | 0.309441 | -5.484322 | 4.15E-08 | 2.15E-07 |
| 3114  | PBX4      | 30.53927666 | -1.697303685 | 0.285181 | -5.951678 | 2.65E-09 | 1.67E-08 |
| 4065  | SERPINF2  | 4672.201144 | -1.697670357 | 0.320444 | -5.297862 | 1.17E-07 | 5.65E-07 |
| 10864 | AKR1B15   | 1.536345091 | -1.698725756 | 0.727431 | -2.33524  | 0.019531 | 0.035238 |
| 1947  | PLEKHG4   | 331.1436517 | -1.699435466 | 0.241479 | -7.037601 | 1.96E-12 | 1.97E-11 |
| 5248  | NANOS3    | 2.120151707 | -1.699524192 | 0.3653   | -4.652413 | 3.28E-06 | 1.23E-05 |
| 205   | PDLIM7    | 898.6318073 | -1.701153003 | 0.152008 | -11.19123 | 4.50E-29 | 4.30E-27 |
| 3359  | DCST2     | 6.822548528 | -1.70149529  | 0.294797 | -5.771749 | 7.85E-09 | 4.58E-08 |
| 749   | KCNMB1    | 172.5481506 | -1.702139851 | 0.191527 | -8.88722  | 6.27E-19 | 1.64E-17 |

|       |           |             |              |          |           |          |          |
|-------|-----------|-------------|--------------|----------|-----------|----------|----------|
| 2022  | LY9       | 58.55191048 | -1.702283115 | 0.245443 | -6.935556 | 4.05E-12 | 3.92E-11 |
| 1502  | PHLDA2    | 92.80641278 | -1.703009537 | 0.225201 | -7.562184 | 3.96E-14 | 5.17E-13 |
| 8252  | DC1001338 | 1.080742085 | -1.703433897 | 0.514182 | -3.312902 | 0.000923 | 0.002193 |
| 9097  | CLCA2     | 1.816069552 | -1.703938511 | 0.572266 | -2.977531 | 0.002906 | 0.006261 |
| 3893  | CYP1B1    | 2066.692683 | -1.705182565 | 0.315343 | -5.407392 | 6.39E-08 | 3.22E-07 |
| 413   | WAS       | 345.2984306 | -1.70524153  | 0.170734 | -9.987693 | 1.73E-23 | 8.19E-22 |
| 2235  | DC1001267 | 126.3015307 | -1.705264009 | 0.253918 | -6.715806 | 1.87E-11 | 1.64E-10 |
| 2708  | CXCR3     | 108.6719429 | -1.705538358 | 0.271875 | -6.273238 | 3.54E-10 | 2.56E-09 |
| 4675  | DPY19L2P  | 25.45090754 | -1.70622201  | 0.344863 | -4.947533 | 7.52E-07 | 3.15E-06 |
| 5084  | MAPK8IP2  | 54.233478   | -1.706715901 | 0.360772 | -4.730737 | 2.24E-06 | 8.62E-06 |
| 8219  | APOC1P1   | 2.137863059 | -1.710195811 | 0.514374 | -3.324807 | 0.000885 | 0.00211  |
| 4925  | PYY2      | 3.991249864 | -1.7106023   | 0.35523  | -4.815472 | 1.47E-06 | 5.84E-06 |
| 3380  | KRT81     | 10.19343308 | -1.711040041 | 0.297111 | -5.758934 | 8.46E-09 | 4.91E-08 |
| 415   | LAPTM5    | 7801.615691 | -1.712652027 | 0.171575 | -9.981934 | 1.83E-23 | 8.64E-22 |
| 1847  | ASB2      | 64.81163982 | -1.71269873  | 0.239895 | -7.139368 | 9.38E-13 | 9.95E-12 |
| 3225  | FAM46B    | 59.62996953 | -1.712867855 | 0.291854 | -5.868913 | 4.39E-09 | 2.67E-08 |
| 4262  | SLC26A10  | 32.27210771 | -1.713068516 | 0.331009 | -5.175287 | 2.28E-07 | 1.05E-06 |
| 4074  | FFAR3     | 6.978518707 | -1.713072182 | 0.323578 | -5.294152 | 1.20E-07 | 5.75E-07 |
| 4961  | SRPK3     | 9.401397512 | -1.713625132 | 0.357618 | -4.79177  | 1.65E-06 | 6.53E-06 |
| 622   | DEF6      | 275.3498154 | -1.71409544  | 0.18544  | -9.243389 | 2.39E-20 | 7.53E-19 |
| 344   | SLC43A3   | 1459.779509 | -1.715144865 | 0.16619  | -10.32036 | 5.70E-25 | 3.25E-23 |
| 1945  | EIF4EBP1  | 1219.960171 | -1.716646083 | 0.243859 | -7.039499 | 1.93E-12 | 1.94E-11 |
| 7256  | ECEL1     | 10.5343677  | -1.717105704 | 0.461268 | -3.722578 | 0.000197 | 0.000533 |
| 3348  | CILP      | 28.19693041 | -1.717735493 | 0.297044 | -5.782773 | 7.35E-09 | 4.30E-08 |
| 994   | NCAPH     | 77.2385955  | -1.718082584 | 0.205618 | -8.355692 | 6.51E-17 | 1.28E-15 |
| 5903  | GPR109B   | 35.54677009 | -1.718384996 | 0.39775  | -4.320268 | 1.56E-05 | 5.17E-05 |
| 6271  | NKAIN2    | 2.509690502 | -1.719257404 | 0.414624 | -4.146543 | 3.38E-05 | 0.000106 |
| 936   | LOC645166 | 265.5654776 | -1.720077399 | 0.203115 | -8.46848  | 2.49E-17 | 5.21E-16 |
| 4042  | LOC389458 | 4.057514509 | -1.720521359 | 0.323915 | -5.311637 | 1.09E-07 | 5.27E-07 |
| 2639  | PCDHGA12  | 68.81365195 | -1.721135063 | 0.271626 | -6.336407 | 2.35E-10 | 1.75E-09 |
| 6722  | STRA8     | 2.157704517 | -1.721603556 | 0.437825 | -3.932177 | 8.42E-05 | 0.000245 |
| 4874  | EXTL1     | 4.292087751 | -1.722250262 | 0.355422 | -4.845654 | 1.26E-06 | 5.08E-06 |
| 15275 | KRTAP2-1  | 0.307408267 | -1.722362526 | 1.858929 | -0.926535 | 0.354168 | 0.454471 |
| 3036  | VCAN      | 7846.291607 | -1.722987518 | 0.286796 | -6.007712 | 1.88E-09 | 1.21E-08 |
| 2217  | CCL5      | 1719.056507 | -1.723388972 | 0.255734 | -6.738985 | 1.59E-11 | 1.41E-10 |
| 3923  | MS4A1     | 40.95844105 | -1.723859338 | 0.319815 | -5.390182 | 7.04E-08 | 3.52E-07 |
| 2750  | FAM20A    | 559.4329345 | -1.724797054 | 0.276436 | -6.239419 | 4.39E-10 | 3.13E-09 |
| 10149 | HBG2      | 9.403011952 | -1.725002117 | 0.663779 | -2.598762 | 0.009356 | 0.018068 |
| 1932  | APOBEC3F  | 26.75464252 | -1.725900694 | 0.244648 | -7.054633 | 1.73E-12 | 1.76E-11 |
| 2270  | OXTR      | 68.74096242 | -1.726165158 | 0.258504 | -6.677511 | 2.43E-11 | 2.10E-10 |
| 2464  | PTCRA     | 4.804366271 | -1.727177703 | 0.265535 | -6.504518 | 7.79E-11 | 6.20E-10 |
| 10308 | RPS4Y1    | 2672.770312 | -1.727740882 | 0.679517 | -2.5426   | 0.011003 | 0.020924 |
| 2051  | FAM26F    | 307.4719394 | -1.72787493  | 0.250372 | -6.901225 | 5.16E-12 | 4.93E-11 |
| 5005  | LOC389634 | 8.491841335 | -1.729805858 | 0.362558 | -4.771109 | 1.83E-06 | 7.18E-06 |
| 616   | CNTNAP1   | 359.5421118 | -1.730567797 | 0.186759 | -9.266313 | 1.93E-20 | 6.13E-19 |
| 2853  | STYK1     | 9.220704428 | -1.731382243 | 0.281943 | -6.140897 | 8.21E-10 | 5.64E-09 |
| 12850 | RPRML     | 0.404963981 | -1.731568352 | 1.024087 | -1.690842 | 0.090867 | 0.138606 |

|       |           |             |              |          |           |          |          |
|-------|-----------|-------------|--------------|----------|-----------|----------|----------|
| 958   | ISG20     | 340.1473216 | -1.731932888 | 0.205378 | -8.432887 | 3.37E-17 | 6.90E-16 |
| 2423  | CNN1      | 497.3741278 | -1.7319558   | 0.264901 | -6.538118 | 6.23E-11 | 5.04E-10 |
| 265   | EMILIN2   | 530.3656124 | -1.73416111  | 0.161223 | -10.75627 | 5.54E-27 | 4.10E-25 |
| 8790  | PITX2     | 52.5843099  | -1.73627471  | 0.562182 | -3.088458 | 0.002012 | 0.004487 |
| 5244  | LOC150197 | 4.219017452 | -1.736381276 | 0.373129 | -4.653569 | 3.26E-06 | 1.22E-05 |
| 6523  | SIGLEC12  | 22.08292248 | -1.737331901 | 0.432502 | -4.016936 | 5.90E-05 | 0.000177 |
| 11504 | TDRG1     | 0.569805389 | -1.73747692  | 0.821206 | -2.115762 | 0.034365 | 0.058553 |
| 6794  | LTF       | 518.4623777 | -1.738006855 | 0.445415 | -3.901992 | 9.54E-05 | 0.000275 |
| 3167  | HTR2B     | 70.1243154  | -1.738251561 | 0.294262 | -5.907161 | 3.48E-09 | 2.15E-08 |
| 751   | LSP1      | 1095.293158 | -1.740954973 | 0.195941 | -8.885093 | 6.39E-19 | 1.67E-17 |
| 327   | FANCA     | 163.9912048 | -1.742107839 | 0.167078 | -10.42691 | 1.87E-25 | 1.12E-23 |
| 3609  | CD27      | 314.2433843 | -1.742826391 | 0.311118 | -5.601818 | 2.12E-08 | 1.15E-07 |
| 8207  | KRTAP1-5  | 0.541363422 | -1.742984417 | 0.523553 | -3.329149 | 0.000871 | 0.002081 |
| 1021  | SIGLEC10  | 395.2536509 | -1.743660091 | 0.21009  | -8.299571 | 1.04E-16 | 2.01E-15 |
| 784   | PHLDA3    | 1231.932356 | -1.743937382 | 0.19822  | -8.797968 | 1.39E-18 | 3.48E-17 |
| 234   | S1PR2     | 147.796171  | -1.74397308  | 0.159139 | -10.95879 | 6.03E-28 | 5.05E-26 |
| 14226 | SSX1      | 0.408039913 | -1.743984051 | 1.394306 | -1.25079  | 0.211011 | 0.290737 |
| 2187  | ITGB1BP2  | 6.150763311 | -1.744866717 | 0.25762  | -6.773023 | 1.26E-11 | 1.13E-10 |
| 8142  | SLC13A3   | 617.1718504 | -1.744925767 | 0.519928 | -3.356089 | 0.000791 | 0.001903 |
| 7804  | LOC554202 | 24.35818954 | -1.745551766 | 0.49871  | -3.500136 | 0.000465 | 0.001168 |
| 5473  | FLJ40330  | 60.45443043 | -1.746995863 | 0.385367 | -4.533328 | 5.81E-06 | 2.08E-05 |
| 5271  | FCAR      | 9.558974658 | -1.74776432  | 0.376561 | -4.64138  | 3.46E-06 | 1.29E-05 |
| 1082  | CEBPA     | 446.1045159 | -1.748162779 | 0.21357  | -8.185416 | 2.71E-16 | 4.92E-15 |
| 500   | CD68      | 7811.840182 | -1.748193502 | 0.181859 | -9.612909 | 7.05E-22 | 2.76E-20 |
| 5643  | CD70      | 1263.329094 | -1.748570751 | 0.392792 | -4.451643 | 8.52E-06 | 2.96E-05 |
| 5915  | TTC36     | 4.6700227   | -1.748682446 | 0.405189 | -4.315715 | 1.59E-05 | 5.27E-05 |
| 10435 | HBD       | 9.682573947 | -1.74897411  | 0.699781 | -2.499315 | 0.012443 | 0.023375 |
| 480   | LPAR2     | 232.1246087 | -1.749418959 | 0.180471 | -9.693615 | 3.21E-22 | 1.31E-20 |
| 7292  | UGT1A3    | 52.91800144 | -1.749452298 | 0.472618 | -3.701619 | 0.000214 | 0.000576 |
| 2169  | NEK2      | 70.57885335 | -1.75033054  | 0.257611 | -6.794466 | 1.09E-11 | 9.82E-11 |
| 5211  | FCER2     | 3.921177219 | -1.750395489 | 0.374528 | -4.673601 | 2.96E-06 | 1.11E-05 |
| 269   | DOK3      | 296.6654147 | -1.750428233 | 0.162983 | -10.73993 | 6.61E-27 | 4.80E-25 |
| 8198  | SLC7A10   | 2.103435069 | -1.751357986 | 0.525387 | -3.333464 | 0.000858 | 0.002051 |
| 1940  | RGS2      | 1017.194446 | -1.751766029 | 0.248753 | -7.042202 | 1.89E-12 | 1.91E-11 |
| 9143  | DSG3      | 1.31164691  | -1.752648119 | 0.591932 | -2.960895 | 0.003067 | 0.006576 |
| 6838  | ALOXE3    | 2.025199199 | -1.75321742  | 0.451335 | -3.884517 | 0.000103 | 0.000294 |
| 5064  | CNR2      | 2.130323185 | -1.753653774 | 0.370031 | -4.739213 | 2.15E-06 | 8.30E-06 |
| 3735  | NTM       | 285.324574  | -1.754781896 | 0.318189 | -5.51491  | 3.49E-08 | 1.83E-07 |
| 1598  | SNHG12    | 389.5365791 | -1.755303235 | 0.23641  | -7.424836 | 1.13E-13 | 1.39E-12 |
| 12483 | PAX7      | 0.413141258 | -1.75592194  | 0.971172 | -1.808044 | 0.0706   | 0.110857 |
| 11781 | OR1J4     | 0.389020641 | -1.756174913 | 0.865925 | -2.028091 | 0.042551 | 0.070796 |
| 804   | LST1      | 304.3759987 | -1.756341443 | 0.20075  | -8.748909 | 2.15E-18 | 5.25E-17 |
| 404   | ADAM19    | 365.9630285 | -1.756540538 | 0.175369 | -10.01628 | 1.29E-23 | 6.24E-22 |
| 2971  | PRR7      | 69.69163572 | -1.757950814 | 0.290292 | -6.055803 | 1.40E-09 | 9.22E-09 |
| 6575  | RGS20     | 23.45584096 | -1.759571976 | 0.440672 | -3.992928 | 6.53E-05 | 0.000195 |
| 3598  | DKK2      | 21.69375585 | -1.760375774 | 0.314033 | -5.605707 | 2.07E-08 | 1.13E-07 |
| 8944  | TTY14     | 2.246431849 | -1.760618362 | 0.580259 | -3.034193 | 0.002412 | 0.005286 |

|       |           |             |              |          |           |          |          |
|-------|-----------|-------------|--------------|----------|-----------|----------|----------|
| 7409  | MOGAT3    | 64.66821631 | -1.761117895 | 0.482093 | -3.653066 | 0.000259 | 0.000686 |
| 12009 | SPINLW1   | 0.491677445 | -1.761522876 | 0.899303 | -1.958764 | 0.05014  | 0.081839 |
| 9345  | AHSG      | 1.037573866 | -1.762857353 | 0.612176 | -2.879656 | 0.003981 | 0.00835  |
| 7683  | MYEOV     | 487.3322414 | -1.764353167 | 0.497547 | -3.546101 | 0.000391 | 0.000997 |
| 9723  | GABRA3    | 0.734434499 | -1.767672823 | 0.645029 | -2.740455 | 0.006135 | 0.012369 |
| 1629  | LTA       | 17.94050462 | -1.768694465 | 0.239323 | -7.390396 | 1.46E-13 | 1.76E-12 |
| 51    | HN1       | 1106.752706 | -1.769566824 | 0.135567 | -13.05307 | 6.10E-39 | 2.30E-36 |
| 6847  | GPR25     | 0.82886174  | -1.769587506 | 0.456084 | -3.879959 | 0.000104 | 0.000299 |
| 2403  | SEMA3B    | 750.6897217 | -1.76981214  | 0.270021 | -6.55436  | 5.59E-11 | 4.56E-10 |
| 545   | RAC2      | 907.5542034 | -1.77050449  | 0.186883 | -9.473862 | 2.70E-21 | 9.70E-20 |
| 3154  | TMEM91    | 1355.219759 | -1.771564513 | 0.29943  | -5.91646  | 3.29E-09 | 2.04E-08 |
| 1058  | B3GNT7    | 97.7112505  | -1.772176105 | 0.215301 | -8.231155 | 1.85E-16 | 3.44E-15 |
| 4819  | FXD7      | 3.206723908 | -1.772274783 | 0.363176 | -4.87993  | 1.06E-06 | 4.32E-06 |
| 15189 | MMP27     | 0.342270791 | -1.772296869 | 1.863316 | -0.951152 | 0.341527 | 0.440732 |
| 806   | TLR9      | 26.40098654 | -1.773073615 | 0.202823 | -8.741978 | 2.29E-18 | 5.57E-17 |
| 9691  | IL17C     | 0.666634102 | -1.77407093  | 0.645433 | -2.748651 | 0.005984 | 0.012103 |
| 2905  | IL10      | 21.86384119 | -1.774183193 | 0.290444 | -6.108527 | 1.01E-09 | 6.78E-09 |
| 1621  | LTBP4     | 1151.247381 | -1.774666094 | 0.239785 | -7.401066 | 1.35E-13 | 1.63E-12 |
| 718   | SLC2A6    | 147.3214293 | -1.775129718 | 0.197888 | -8.970395 | 2.95E-19 | 8.07E-18 |
| 673   | KIFC1     | 126.2206637 | -1.775725992 | 0.195315 | -9.091614 | 9.76E-20 | 2.84E-18 |
| 926   | SIGLEC7   | 98.89272077 | -1.775973545 | 0.209365 | -8.482662 | 2.20E-17 | 4.66E-16 |
| 2406  | PSTPIP1   | 134.4950295 | -1.776095067 | 0.271082 | -6.551885 | 5.68E-11 | 4.63E-10 |
| 6005  | CDRT1     | 1.850541912 | -1.776151694 | 0.416492 | -4.264556 | 2.00E-05 | 6.54E-05 |
| 1279  | PIM2      | 794.1885053 | -1.776358664 | 0.225057 | -7.892923 | 2.95E-15 | 4.52E-14 |
| 2638  | CD209     | 195.8275436 | -1.776884249 | 0.280403 | -6.336886 | 2.34E-10 | 1.74E-09 |
| 831   | EBI3      | 125.0262478 | -1.777125929 | 0.204844 | -8.675523 | 4.12E-18 | 9.70E-17 |
| 2012  | FUT7      | 12.55861367 | -1.777370709 | 0.255924 | -6.944912 | 3.79E-12 | 3.69E-11 |
| 2634  | NAPSB     | 371.2179657 | -1.778097849 | 0.280394 | -6.341422 | 2.28E-10 | 1.69E-09 |
| 325   | FXD5      | 1929.021235 | -1.778415759 | 0.170443 | -10.43408 | 1.73E-25 | 1.05E-23 |
| 8877  | CALML6    | 1.164624057 | -1.778869533 | 0.581027 | -3.061593 | 0.002202 | 0.004861 |
| 1630  | ATP10A    | 200.9728817 | -1.778884745 | 0.240845 | -7.38601  | 1.51E-13 | 1.82E-12 |
| 1518  | FCGR2C    | 143.022179  | -1.780344353 | 0.23626  | -7.535528 | 4.86E-14 | 6.28E-13 |
| 925   | CD44      | 5125.096267 | -1.780919697 | 0.209931 | -8.483352 | 2.19E-17 | 4.64E-16 |
| 425   | TNFAIP8L2 | 157.2781046 | -1.782012488 | 0.179189 | -9.944891 | 2.65E-23 | 1.22E-21 |
| 2973  | C6orf81   | 9.739744995 | -1.782093381 | 0.294341 | -6.054512 | 1.41E-09 | 9.29E-09 |
| 5747  | HTR2A     | 4.086554096 | -1.782695241 | 0.405229 | -4.39923  | 1.09E-05 | 3.71E-05 |
| 9966  | KRT6B     | 1.793711648 | -1.782763178 | 0.669054 | -2.664603 | 0.007708 | 0.01516  |
| 7281  | FOXL2     | 1.121085044 | -1.782880299 | 0.48088  | -3.707541 | 0.000209 | 0.000563 |
| 1897  | PIF1      | 26.04749329 | -1.783606336 | 0.251619 | -7.088522 | 1.36E-12 | 1.40E-11 |
| 1968  | MESP1     | 42.31719516 | -1.785809501 | 0.254909 | -7.005684 | 2.46E-12 | 2.45E-11 |
| 2296  | PRR11     | 38.69889869 | -1.786670254 | 0.268303 | -6.659153 | 2.75E-11 | 2.35E-10 |
| 259   | QSOX1     | 5616.539716 | -1.786743359 | 0.165607 | -10.78903 | 3.88E-27 | 2.94E-25 |
| 775   | LOXL3     | 150.3590647 | -1.787175995 | 0.202519 | -8.82473  | 1.10E-18 | 2.78E-17 |
| 6973  | GATA1     | 1.742206961 | -1.787492453 | 0.465884 | -3.836779 | 0.000125 | 0.00035  |
| 4482  | C9orf170  | 2.577283003 | -1.78870577  | 0.354261 | -5.049116 | 4.44E-07 | 1.94E-06 |
| 948   | RUNX2     | 263.8038138 | -1.788706401 | 0.211709 | -8.448899 | 2.94E-17 | 6.08E-16 |
| 1253  | ROBO3     | 116.0157563 | -1.789397077 | 0.225651 | -7.929937 | 2.19E-15 | 3.43E-14 |



|       |           |             |              |          |           |          |          |
|-------|-----------|-------------|--------------|----------|-----------|----------|----------|
| 7036  | C21orf121 | 1.481217867 | -1.789583892 | 0.470237 | -3.805704 | 0.000141 | 0.000394 |
| 726   | SULF2     | 4805.609598 | -1.791393668 | 0.200187 | -8.948589 | 3.60E-19 | 9.72E-18 |
| 2848  | PPEF1     | 18.80329796 | -1.793006143 | 0.291822 | -6.144167 | 8.04E-10 | 5.53E-09 |
| 8529  | TPTE2     | 1.125236812 | -1.793493721 | 0.561287 | -3.195327 | 0.001397 | 0.00321  |
| 872   | NCF1      | 170.9934655 | -1.793892235 | 0.208693 | -8.59586  | 8.26E-18 | 1.86E-16 |
| 3594  | MEST      | 509.1361368 | -1.79445848  | 0.320013 | -5.607448 | 2.05E-08 | 1.12E-07 |
| 301   | ITGA5     | 5755.25714  | -1.796549854 | 0.170481 | -10.53813 | 5.76E-26 | 3.75E-24 |
| 970   | CEACAM2   | 34.32753779 | -1.797250041 | 0.21408  | -8.39524  | 4.65E-17 | 9.40E-16 |
| 2089  | MEF2B     | 37.20606703 | -1.7973332   | 0.262166 | -6.855701 | 7.10E-12 | 6.66E-11 |
| 1327  | TNFRSF8   | 25.539326   | -1.797764407 | 0.229627 | -7.829071 | 4.91E-15 | 7.26E-14 |
| 771   | CLEC2B    | 550.9245034 | -1.798147376 | 0.203665 | -8.828932 | 1.06E-18 | 2.69E-17 |
| 10831 | EPB42     | 1.958167209 | -1.798939614 | 0.765404 | -2.350315 | 0.018758 | 0.033946 |
| 6999  | CCKBR     | 1.376132347 | -1.800712009 | 0.470857 | -3.82433  | 0.000131 | 0.000367 |
| 7685  | HBG1      | 12.95787242 | -1.801744469 | 0.508238 | -3.54508  | 0.000392 | 0.001001 |
| 176   | BMP1      | 1291.62018  | -1.802587039 | 0.157398 | -11.45239 | 2.29E-30 | 2.55E-28 |
| 309   | LRP1      | 8952.001554 | -1.804087929 | 0.171962 | -10.4912  | 9.48E-26 | 6.01E-24 |
| 1740  | MEFV      | 43.3901506  | -1.804539332 | 0.248826 | -7.252208 | 4.10E-13 | 4.62E-12 |
| 1428  | PPFIA3    | 170.0081942 | -1.805183913 | 0.235414 | -7.668129 | 1.75E-14 | 2.40E-13 |
| 241   | PLEKHO1   | 1132.894798 | -1.805787331 | 0.165315 | -10.92332 | 8.92E-28 | 7.26E-26 |
| 743   | PRR24     | 235.1335622 | -1.807086416 | 0.20288  | -8.907149 | 5.24E-19 | 1.38E-17 |
| 591   | KCNK6     | 127.5620314 | -1.807309785 | 0.193309 | -9.349341 | 8.82E-21 | 2.93E-19 |
| 1722  | TK1       | 641.7554393 | -1.807424254 | 0.248527 | -7.272551 | 3.53E-13 | 4.02E-12 |
| 516   | HTRA1     | 7260.983756 | -1.807732383 | 0.189416 | -9.543711 | 1.38E-21 | 5.24E-20 |
| 6918  | CAMP      | 2.097271607 | -1.807842454 | 0.468757 | -3.856672 | 0.000115 | 0.000326 |
| 4815  | MEG3      | 43.36818385 | -1.808209255 | 0.370412 | -4.881614 | 1.05E-06 | 4.28E-06 |
| 5347  | KCNG2     | 1.269958381 | -1.808281572 | 0.393545 | -4.594851 | 4.33E-06 | 1.59E-05 |
| 97    | CCNF      | 122.3801927 | -1.808848396 | 0.146044 | -12.38564 | 3.13E-35 | 6.32E-33 |
| 1760  | HAUS7     | 674.2579794 | -1.810012053 | 0.250312 | -7.231024 | 4.79E-13 | 5.34E-12 |
| 7342  | CYP26A1   | 7.963163585 | -1.810515528 | 0.491469 | -3.683888 | 0.00023  | 0.000613 |
| 6892  | EPHA8     | 0.715013657 | -1.810611606 | 0.468145 | -3.867629 | 0.00011  | 0.000313 |
| 4817  | CORO6     | 37.79918625 | -1.810705235 | 0.371016 | -4.880399 | 1.06E-06 | 4.31E-06 |
| 650   | PLOD2     | 10904.6675  | -1.811875056 | 0.19758  | -9.170321 | 4.72E-20 | 1.42E-18 |
| 8280  | MMP8      | 1.721144722 | -1.812503574 | 0.549079 | -3.30099  | 0.000963 | 0.002281 |
| 5304  | CHI3L1    | 632.8031732 | -1.812521674 | 0.392427 | -4.618747 | 3.86E-06 | 1.43E-05 |
| 3260  | UPK3B     | 9.983088568 | -1.81375384  | 0.310302 | -5.845132 | 5.06E-09 | 3.04E-08 |
| 8751  | CEACAM6   | 1.468149456 | -1.814181835 | 0.584039 | -3.106269 | 0.001895 | 0.004244 |
| 12065 | ZSCAN10   | 0.39959218  | -1.814336466 | 0.935268 | -1.93991  | 0.052391 | 0.085115 |
| 748   | MKI67     | 611.6789269 | -1.815700426 | 0.204055 | -8.89809  | 5.68E-19 | 1.49E-17 |
| 399   | PLOD1     | 7878.628834 | -1.817085495 | 0.181115 | -10.03278 | 1.09E-23 | 5.37E-22 |
| 11754 | OLIG3     | 0.486717552 | -1.817382954 | 0.892467 | -2.036359 | 0.041714 | 0.069557 |
| 1808  | MMP2      | 2396.380021 | -1.819253313 | 0.253347 | -7.180863 | 6.93E-13 | 7.51E-12 |
| 2931  | KCNH4     | 5.182838243 | -1.820569519 | 0.299088 | -6.087077 | 1.15E-09 | 7.69E-09 |
| 12293 | MAGEA3    | 0.82266637  | -1.820853185 | 0.974607 | -1.868294 | 0.061721 | 0.098413 |
| 769   | RCN3      | 484.3815626 | -1.820883701 | 0.206002 | -8.839162 | 9.64E-19 | 2.46E-17 |
| 1802  | XCL2      | 26.07130693 | -1.822065936 | 0.253374 | -7.191201 | 6.42E-13 | 6.99E-12 |
| 1064  | COL5A2    | 2967.423798 | -1.823182903 | 0.221814 | -8.219413 | 2.05E-16 | 3.77E-15 |
| 2880  | C1orf200  | 2.171764081 | -1.82356714  | 0.297772 | -6.124034 | 9.12E-10 | 6.21E-09 |

|       |           |             |              |          |           |          |          |
|-------|-----------|-------------|--------------|----------|-----------|----------|----------|
| 8122  | C7orf52   | 4.988069025 | -1.823861183 | 0.542688 | -3.360794 | 0.000777 | 0.001876 |
| 1289  | CBR3      | 129.4946232 | -1.824721918 | 0.231664 | -7.876592 | 3.36E-15 | 5.12E-14 |
| 1750  | NUF2      | 65.45354383 | -1.824808836 | 0.251968 | -7.242235 | 4.41E-13 | 4.94E-12 |
| 3519  | LPPR4     | 64.52432001 | -1.825082247 | 0.322566 | -5.658013 | 1.53E-08 | 8.53E-08 |
| 3932  | RTN4RL1   | 168.5127101 | -1.825504244 | 0.339143 | -5.382693 | 7.34E-08 | 3.66E-07 |
| 2233  | SLAMF7    | 491.8925525 | -1.826422585 | 0.271875 | -6.717885 | 1.84E-11 | 1.62E-10 |
| 250   | B3GNTL1   | 90.04909498 | -1.826550932 | 0.168375 | -10.84808 | 2.04E-27 | 1.60E-25 |
| 4879  | CCDC42B   | 5.792321039 | -1.828363069 | 0.377554 | -4.842655 | 1.28E-06 | 5.15E-06 |
| 701   | CSTA      | 92.06090411 | -1.829465482 | 0.202801 | -9.021004 | 1.86E-19 | 5.21E-18 |
| 5743  | ICAM5     | 8.703447363 | -1.829731046 | 0.415773 | -4.400791 | 1.08E-05 | 3.68E-05 |
| 4134  | CNFN      | 27.74283722 | -1.829957749 | 0.347864 | -5.260552 | 1.44E-07 | 6.81E-07 |
| 1969  | MATK      | 130.4166032 | -1.830684728 | 0.261436 | -7.002433 | 2.52E-12 | 2.50E-11 |
| 12628 | LOC285501 | 0.35503479  | -1.830884903 | 1.037484 | -1.764736 | 0.077608 | 0.120462 |
| 3070  | DARC      | 412.6839135 | -1.831414517 | 0.306155 | -5.981983 | 2.20E-09 | 1.41E-08 |
| 7105  | NCAN      | 1.244497592 | -1.834391586 | 0.485059 | -3.781787 | 0.000156 | 0.000429 |
| 3012  | TSHZ2     | 88.82369164 | -1.83499824  | 0.304594 | -6.024398 | 1.70E-09 | 1.10E-08 |
| 2431  | SIGLEC11  | 19.85971795 | -1.836056252 | 0.281171 | -6.530023 | 6.58E-11 | 5.30E-10 |
| 1179  | TAGLN     | 6701.294121 | -1.836095067 | 0.22802  | -8.052357 | 8.12E-16 | 1.35E-14 |
| 1540  | JPH2      | 362.6394658 | -1.836288907 | 0.24463  | -7.506395 | 6.08E-14 | 7.74E-13 |
| 1991  | S100A9    | 481.154111  | -1.836651326 | 0.26336  | -6.973932 | 3.08E-12 | 3.03E-11 |
| 501   | KCND1     | 79.1642775  | -1.838305702 | 0.191262 | -9.611433 | 7.15E-22 | 2.80E-20 |
| 6826  | JSRP1     | 27.18301786 | -1.838371547 | 0.472661 | -3.889406 | 0.0001   | 0.000289 |
| 1801  | PTPRCAP   | 338.6336361 | -1.838535038 | 0.255666 | -7.19115  | 6.42E-13 | 6.99E-12 |
| 2679  | GFRA2     | 80.77912616 | -1.840228966 | 0.29214  | -6.299124 | 2.99E-10 | 2.19E-09 |
| 8837  | C14orf184 | 1.364396293 | -1.840563927 | 0.59847  | -3.075447 | 0.002102 | 0.004662 |
| 7500  | UBL4B     | 1.354026988 | -1.840720052 | 0.508806 | -3.617723 | 0.000297 | 0.000777 |
| 729   | RPL39L    | 111.1578406 | -1.843377821 | 0.206114 | -8.943501 | 3.77E-19 | 1.01E-17 |
| 289   | FCER1G    | 1041.347156 | -1.843391777 | 0.173364 | -10.63307 | 2.09E-26 | 1.42E-24 |
| 1670  | ZNF296    | 35.95880439 | -1.846020739 | 0.251726 | -7.333455 | 2.24E-13 | 2.63E-12 |
| 352   | PLP2      | 2117.16099  | -1.846428967 | 0.179731 | -10.27331 | 9.30E-25 | 5.18E-23 |
| 9339  | CRYBA4    | 0.575863642 | -1.847984843 | 0.640897 | -2.883433 | 0.003934 | 0.008256 |
| 4048  | PLEKHG4F  | 50.33425653 | -1.848830775 | 0.348322 | -5.307826 | 1.11E-07 | 5.37E-07 |
| 2080  | IL9R      | 5.640138337 | -1.850467602 | 0.269358 | -6.869911 | 6.42E-12 | 6.05E-11 |
| 2178  | CH25H     | 49.27580991 | -1.850496282 | 0.272946 | -6.779714 | 1.20E-11 | 1.08E-10 |
| 610   | DUSP23    | 1469.30325  | -1.85070553  | 0.199156 | -9.292747 | 1.50E-20 | 4.83E-19 |
| 5711  | CNTN6     | 6.186907875 | -1.850940261 | 0.419261 | -4.414769 | 1.01E-05 | 3.47E-05 |
| 258   | C1QTNF6   | 593.6287545 | -1.85428062  | 0.171863 | -10.78929 | 3.87E-27 | 2.94E-25 |
| 3271  | PVRL4     | 23.45813287 | -1.856228838 | 0.318171 | -5.834062 | 5.41E-09 | 3.24E-08 |
| 3014  | OC1002160 | 7.226186784 | -1.857117939 | 0.308324 | -6.023263 | 1.71E-09 | 1.11E-08 |
| 3541  | CKM       | 1.874176784 | -1.858961486 | 0.32956  | -5.640744 | 1.69E-08 | 9.37E-08 |
| 56    | STAC3     | 86.73718971 | -1.859076453 | 0.143084 | -12.99288 | 1.34E-38 | 4.70E-36 |
| 5080  | GTSF1     | 7.07452862  | -1.861384614 | 0.39334  | -4.732254 | 2.22E-06 | 8.57E-06 |
| 342   | FERMT3    | 652.5637665 | -1.862907057 | 0.180361 | -10.32877 | 5.22E-25 | 2.99E-23 |
| 3616  | ADRA2A    | 112.8437375 | -1.863133449 | 0.332931 | -5.596163 | 2.19E-08 | 1.19E-07 |
| 3542  | ANGPTL6   | 6.845527448 | -1.863154036 | 0.330312 | -5.640593 | 1.69E-08 | 9.38E-08 |
| 122   | RUNX1     | 1630.082779 | -1.863232768 | 0.154903 | -12.02842 | 2.52E-33 | 4.05E-31 |
| 8396  | C6orf118  | 0.575287469 | -1.863758887 | 0.57354  | -3.249571 | 0.001156 | 0.002698 |

|       |          |             |              |          |           |          |          |
|-------|----------|-------------|--------------|----------|-----------|----------|----------|
| 508   | CD300C   | 66.24644164 | -1.864504151 | 0.194671 | -9.577699 | 9.92E-22 | 3.83E-20 |
| 423   | OSCAR    | 116.9703196 | -1.865180099 | 0.187397 | -9.953105 | 2.44E-23 | 1.13E-21 |
| 179   | FKBP11   | 726.7645883 | -1.865263932 | 0.163463 | -11.41094 | 3.69E-30 | 4.03E-28 |
| 372   | ANKRD58  | 32.6001992  | -1.865867615 | 0.183471 | -10.16984 | 2.70E-24 | 1.42E-22 |
| 199   | CMTM3    | 1223.094981 | -1.865883856 | 0.165904 | -11.24675 | 2.40E-29 | 2.37E-27 |
| 7222  | HIST1H1B | 0.490238856 | -1.866088611 | 0.499325 | -3.737222 | 0.000186 | 0.000505 |
| 2370  | SYTL1    | 94.88339215 | -1.866355881 | 0.283255 | -6.58895  | 4.43E-11 | 3.66E-10 |
| 4876  | IRGM     | 1.347582994 | -1.866708458 | 0.385386 | -4.843737 | 1.27E-06 | 5.12E-06 |
| 8273  | SCGB3A2  | 0.572227216 | -1.868582305 | 0.565612 | -3.303646 | 0.000954 | 0.002261 |
| 9552  | UTF1     | 0.657821809 | -1.86997748  | 0.667597 | -2.801058 | 0.005094 | 0.010452 |
| 1682  | FPR1     | 340.0579895 | -1.870760131 | 0.255632 | -7.318178 | 2.51E-13 | 2.93E-12 |
| 10205 | XKR7     | 0.439216535 | -1.871824839 | 0.72558  | -2.579764 | 0.009887 | 0.01899  |
| 3369  | UCN      | 8.841781462 | -1.872042238 | 0.324617 | -5.766927 | 8.07E-09 | 4.70E-08 |
| 7853  | IL5RA    | 2.943418759 | -1.872700852 | 0.539683 | -3.47     | 0.00052  | 0.001299 |
| 5164  | C8G      | 19.39034669 | -1.873067756 | 0.399131 | -4.692865 | 2.69E-06 | 1.02E-05 |
| 2493  | C2       | 2526.536513 | -1.874273149 | 0.289632 | -6.471226 | 9.72E-11 | 7.64E-10 |
| 1937  | TNC      | 2700.531267 | -1.874759748 | 0.2661   | -7.045313 | 1.85E-12 | 1.87E-11 |
| 380   | PLB1     | 93.4525357  | -1.876027439 | 0.185325 | -10.12292 | 4.37E-24 | 2.26E-22 |
| 3397  | FGF18    | 7.382541272 | -1.877769522 | 0.326613 | -5.749224 | 8.97E-09 | 5.17E-08 |
| 13158 | MRGPRX3  | 0.342889938 | -1.878852623 | 1.180199 | -1.59198  | 0.111389 | 0.16592  |
| 4361  | CST6     | 5.087950658 | -1.879269251 | 0.366583 | -5.126456 | 2.95E-07 | 1.33E-06 |
| 1182  | CCR7     | 80.0138869  | -1.879282851 | 0.233471 | -8.049306 | 8.33E-16 | 1.38E-14 |
| 5230  | NKD2     | 182.6067552 | -1.879513285 | 0.403015 | -4.663637 | 3.11E-06 | 1.16E-05 |
| 2340  | CCDC80   | 1676.175084 | -1.880083491 | 0.284123 | -6.617136 | 3.66E-11 | 3.07E-10 |
| 5372  | APOC4    | 1.524606838 | -1.881285161 | 0.410543 | -4.582431 | 4.60E-06 | 1.68E-05 |
| 1904  | ITGA11   | 387.3551271 | -1.881873831 | 0.265668 | -7.083562 | 1.40E-12 | 1.45E-11 |
| 15285 | RAX      | 0.394441398 | -1.881895677 | 2.034988 | -0.92477  | 0.355086 | 0.455351 |
| 3795  | PHEX     | 12.96488525 | -1.88211037  | 0.343706 | -5.475924 | 4.35E-08 | 2.25E-07 |
| 1843  | CDCA7    | 111.5269823 | -1.88211117  | 0.263352 | -7.146737 | 8.89E-13 | 9.45E-12 |
| 716   | LILRB3   | 152.221851  | -1.883044183 | 0.20985  | -8.97328  | 2.88E-19 | 7.88E-18 |
| 192   | SPI1     | 723.9862878 | -1.884403632 | 0.166685 | -11.3052  | 1.24E-29 | 1.26E-27 |
| 135   | TMEM149  | 239.0724294 | -1.884899496 | 0.159832 | -11.79299 | 4.24E-32 | 6.16E-30 |
| 2410  | IRF4     | 92.71683946 | -1.885018303 | 0.287761 | -6.550638 | 5.73E-11 | 4.66E-10 |
| 3704  | PODXL2   | 235.3932064 | -1.887227562 | 0.341028 | -5.533932 | 3.13E-08 | 1.66E-07 |
| 13447 | LGALS7B  | 0.50925928  | -1.889658375 | 1.257887 | -1.502249 | 0.133033 | 0.193937 |
| 6320  | KCNS2    | 2.459710909 | -1.88998161  | 0.459072 | -4.116965 | 3.84E-05 | 0.000119 |
| 5068  | ODZ3     | 257.7192339 | -1.891023195 | 0.399073 | -4.738544 | 2.15E-06 | 8.33E-06 |
| 8917  | OR7C1    | 0.785547877 | -1.891077771 | 0.621101 | -3.04472  | 0.002329 | 0.005119 |
| 5921  | LILRP2   | 1.609869214 | -1.892089062 | 0.438795 | -4.31201  | 1.62E-05 | 5.36E-05 |
| 3333  | SRRM3    | 76.99618448 | -1.892587014 | 0.326599 | -5.794838 | 6.84E-09 | 4.02E-08 |
| 564   | ROM1     | 117.3667488 | -1.894473222 | 0.201028 | -9.423936 | 4.34E-21 | 1.51E-19 |
| 8637  | TRIML2   | 0.596835601 | -1.896187897 | 0.600423 | -3.158085 | 0.001588 | 0.003604 |
| 1479  | NCF1C    | 59.35571308 | -1.897052802 | 0.249646 | -7.598986 | 2.98E-14 | 3.96E-13 |
| 8111  | PON1     | 1.311995796 | -1.897384553 | 0.56385  | -3.365053 | 0.000765 | 0.001849 |
| 3442  | ITGA2B   | 18.3195167  | -1.89771084  | 0.332202 | -5.712515 | 1.11E-08 | 6.34E-08 |
| 4118  | CXCR2P1  | 76.86448596 | -1.897791601 | 0.360007 | -5.271545 | 1.35E-07 | 6.44E-07 |
| 1794  | HTRA3    | 287.8184033 | -1.898475351 | 0.263801 | -7.196625 | 6.17E-13 | 6.74E-12 |

|       |           |             |              |          |           |          |          |
|-------|-----------|-------------|--------------|----------|-----------|----------|----------|
| 10553 | C10orf91  | 0.420530302 | -1.898723333 | 0.774246 | -2.452351 | 0.014193 | 0.026361 |
| 593   | HCST      | 264.424095  | -1.898855569 | 0.203258 | -9.342095 | 9.44E-21 | 3.12E-19 |
| 3284  | CES8      | 838.3411402 | -1.901189491 | 0.326382 | -5.825044 | 5.71E-09 | 3.41E-08 |
| 5436  | L1CAM     | 190.5447842 | -1.901500869 | 0.417953 | -4.549561 | 5.38E-06 | 1.94E-05 |
| 196   | NCF4      | 251.1150164 | -1.902556754 | 0.168781 | -11.27234 | 1.80E-29 | 1.80E-27 |
| 9522  | POU3F2    | 0.98445278  | -1.902741449 | 0.677335 | -2.809157 | 0.004967 | 0.010225 |
| 22    | IMPDH1    | 710.2966822 | -1.902816342 | 0.135422 | -14.051   | 7.60E-45 | 6.77E-42 |
| 11068 | TRY6      | 0.557815767 | -1.905690367 | 0.840429 | -2.267522 | 0.023358 | 0.041367 |
| 16142 | FAM197Y2  | 0.374288082 | -1.906548639 | 2.852712 | -0.668329 | 0.503924 | 0.611908 |
| 2354  | FBLN7     | 203.352206  | -1.909607517 | 0.289188 | -6.603333 | 4.02E-11 | 3.35E-10 |
| 4461  | DC1001323 | 6.298723256 | -1.909917368 | 0.377304 | -5.062014 | 4.15E-07 | 1.82E-06 |
| 13295 | C8A       | 0.455894788 | -1.911179075 | 1.236701 | -1.545385 | 0.122253 | 0.180239 |
| 6899  | CACNG4    | 12.45455294 | -1.911760844 | 0.494591 | -3.865338 | 0.000111 | 0.000315 |
| 133   | GALNT2    | 3817.23231  | -1.913268871 | 0.161864 | -11.82023 | 3.07E-32 | 4.52E-30 |
| 4     | ARPC1B    | 3643.968242 | -1.91518261  | 0.120445 | -15.90093 | 6.24E-57 | 2.45E-53 |
| 7539  | KPNA7     | 1.31252143  | -1.916956356 | 0.53259  | -3.599306 | 0.000319 | 0.000829 |
| 3521  | TLL2      | 16.88339343 | -1.917235959 | 0.338885 | -5.657491 | 1.54E-08 | 8.55E-08 |
| 3859  | MT1L      | 199.8053291 | -1.917701743 | 0.353358 | -5.427072 | 5.73E-08 | 2.91E-07 |
| 8145  | DYDC2     | 4.187467043 | -1.918295259 | 0.571738 | -3.3552   | 0.000793 | 0.001909 |
| 997   | RRM2      | 431.9142912 | -1.920717503 | 0.229925 | -8.353672 | 6.62E-17 | 1.30E-15 |
| 13176 | LOC389033 | 0.538164317 | -1.920863537 | 1.210471 | -1.586872 | 0.112542 | 0.16742  |
| 1000  | CARD9     | 78.90881577 | -1.922157257 | 0.230262 | -8.347686 | 6.96E-17 | 1.36E-15 |
| 1263  | FN1       | 51328.97885 | -1.924131919 | 0.243247 | -7.910211 | 2.57E-15 | 3.99E-14 |
| 1466  | CCDC19    | 10.8779074  | -1.925312842 | 0.252744 | -7.617635 | 2.58E-14 | 3.45E-13 |
| 572   | CDT1      | 139.1789728 | -1.925572153 | 0.204764 | -9.403843 | 5.26E-21 | 1.80E-19 |
| 542   | TRPM2     | 343.7965708 | -1.926680276 | 0.203104 | -9.486191 | 2.40E-21 | 8.67E-20 |
| 4220  | IL11      | 3.459288046 | -1.928059385 | 0.370893 | -5.19843  | 2.01E-07 | 9.34E-07 |
| 1641  | PRRX1     | 299.665106  | -1.928501536 | 0.261592 | -7.372181 | 1.68E-13 | 2.00E-12 |
| 596   | ALOX5     | 810.0223572 | -1.931482275 | 0.207048 | -9.328678 | 1.07E-20 | 3.52E-19 |
| 10771 | FAM9A     | 0.405885688 | -1.931636879 | 0.813333 | -2.374963 | 0.017551 | 0.031939 |
| 1302  | LOC283050 | 32.85082578 | -1.932237594 | 0.245755 | -7.862463 | 3.77E-15 | 5.67E-14 |
| 5307  | SYNGR4    | 2.497540669 | -1.933373255 | 0.418893 | -4.615432 | 3.92E-06 | 1.45E-05 |
| 157   | GNA15     | 168.0121695 | -1.935497165 | 0.166808 | -11.60316 | 3.97E-31 | 4.96E-29 |
| 1160  | FZD2      | 100.9610509 | -1.936172496 | 0.23971  | -8.077162 | 6.63E-16 | 1.12E-14 |
| 381   | GPR68     | 78.64562943 | -1.939927762 | 0.191687 | -10.12031 | 4.49E-24 | 2.31E-22 |
| 10848 | SERPINA9  | 1.73862518  | -1.940192272 | 0.829109 | -2.340092 | 0.019279 | 0.034836 |
| 797   | TPM2      | 3075.726889 | -1.941301637 | 0.22166  | -8.758006 | 1.99E-18 | 4.89E-17 |
| 1181  | SKA1      | 48.5060845  | -1.941443278 | 0.241153 | -8.050682 | 8.23E-16 | 1.37E-14 |
| 1957  | ACTG2     | 600.1289801 | -1.943260611 | 0.276607 | -7.025336 | 2.14E-12 | 2.14E-11 |
| 9130  | FGFBP1    | 1.150157511 | -1.943683972 | 0.655364 | -2.965808 | 0.003019 | 0.006481 |
| 13930 | TCHHL1    | 0.383655073 | -1.943758076 | 1.449175 | -1.341286 | 0.179828 | 0.253037 |
| 12197 | SPANXN3   | 0.441533081 | -1.944275858 | 1.024877 | -1.897081 | 0.057817 | 0.092914 |
| 2856  | COL13A1   | 42.55900499 | -1.945204421 | 0.316821 | -6.139751 | 8.27E-10 | 5.67E-09 |
| 2244  | RAB40A    | 13.61277226 | -1.946074824 | 0.290388 | -6.701643 | 2.06E-11 | 1.80E-10 |
| 3705  | BTBD11    | 222.0539942 | -1.947128567 | 0.351864 | -5.533755 | 3.13E-08 | 1.66E-07 |
| 9399  | DBX2      | 0.408733308 | -1.947440635 | 0.681084 | -2.859327 | 0.004245 | 0.008854 |
| 9516  | TP53TG3B  | 1.306372193 | -1.950910892 | 0.693355 | -2.813727 | 0.004897 | 0.010087 |

|       |           |             |              |          |           |          |          |
|-------|-----------|-------------|--------------|----------|-----------|----------|----------|
| 2459  | ITGBL1    | 273.0323488 | -1.951502849 | 0.299899 | -6.507197 | 7.66E-11 | 6.10E-10 |
| 11309 | PITX3     | 0.467981223 | -1.953887144 | 0.897899 | -2.176065 | 0.02955  | 0.051217 |
| 6140  | HEMGN     | 3.597943121 | -1.954226753 | 0.464724 | -4.205135 | 2.61E-05 | 8.33E-05 |
| 11477 | MC4R      | 0.550210032 | -1.954351791 | 0.918551 | -2.127646 | 0.033366 | 0.056985 |
| 253   | PRSS36    | 38.85414188 | -1.954746767 | 0.180638 | -10.82134 | 2.73E-27 | 2.11E-25 |
| 5308  | FNFRSF13I | 5.916083445 | -1.956131415 | 0.423822 | -4.61546  | 3.92E-06 | 1.45E-05 |
| 4103  | RAB42     | 346.3265808 | -1.957357737 | 0.37073  | -5.279745 | 1.29E-07 | 6.18E-07 |
| 8521  | GUCA1A    | 0.776265664 | -1.957428705 | 0.612307 | -3.196811 | 0.00139  | 0.003196 |
| 1102  | CDC45     | 55.06889575 | -1.958942114 | 0.240176 | -8.156288 | 3.45E-16 | 6.14E-15 |
| 3299  | MESP2     | 6.777007203 | -1.960214363 | 0.337011 | -5.816474 | 6.01E-09 | 3.57E-08 |
| 462   | UHRF1     | 116.1826723 | -1.96063719  | 0.200905 | -9.759025 | 1.69E-22 | 7.16E-21 |
| 229   | CDCA5     | 144.993772  | -1.96112391  | 0.178544 | -10.984   | 4.56E-28 | 3.91E-26 |
| 3291  | SPATA12   | 3.952618796 | -1.961978547 | 0.337009 | -5.821748 | 5.82E-09 | 3.47E-08 |
| 9912  | SFRP5     | 1.251626812 | -1.962259119 | 0.730963 | -2.684484 | 0.007264 | 0.014365 |
| 519   | RAD54L    | 48.00125818 | -1.962840016 | 0.205728 | -9.540963 | 1.42E-21 | 5.34E-20 |
| 9858  | KRT39     | 0.61392611  | -1.964565345 | 0.727354 | -2.700976 | 0.006914 | 0.013747 |
| 6238  | NXF3      | 1.639267353 | -1.964741877 | 0.472358 | -4.159437 | 3.19E-05 | 0.0001   |
| 983   | TGM2      | 13778.76233 | -1.965842731 | 0.234828 | -8.37141  | 5.69E-17 | 1.14E-15 |
| 658   | SERINC2   | 4902.823204 | -1.965903091 | 0.214787 | -9.15282  | 5.55E-20 | 1.65E-18 |
| 1393  | CFB       | 4757.241038 | -1.966340268 | 0.254575 | -7.724021 | 1.13E-14 | 1.59E-13 |
| 303   | KCTD17    | 256.1178927 | -1.967455402 | 0.186843 | -10.52997 | 6.29E-26 | 4.07E-24 |
| 528   | COL6A1    | 8315.547951 | -1.968901861 | 0.206693 | -9.525753 | 1.64E-21 | 6.08E-20 |
| 857   | ADAMTSL   | 559.9426934 | -1.969099205 | 0.228282 | -8.62572  | 6.37E-18 | 1.46E-16 |
| 12637 | MAGEC1    | 0.467702125 | -1.969448118 | 1.117264 | -1.762742 | 0.077944 | 0.120897 |
| 3135  | BEAN      | 18.94237708 | -1.969737488 | 0.331831 | -5.935964 | 2.92E-09 | 1.83E-08 |
| 1364  | LTBP1     | 1997.829585 | -1.970918259 | 0.253576 | -7.772481 | 7.70E-15 | 1.11E-13 |
| 845   | TMEM158   | 47.25441944 | -1.971249372 | 0.228073 | -8.643076 | 5.47E-18 | 1.27E-16 |
| 7624  | CHGA      | 2.184740885 | -1.973497692 | 0.55291  | -3.569296 | 0.000358 | 0.00092  |
| 53    | CENPW     | 59.09872579 | -1.976454888 | 0.151434 | -13.05156 | 6.23E-39 | 2.30E-36 |
| 13873 | MAGEB10   | 0.367204242 | -1.976541823 | 1.452296 | -1.360978 | 0.173521 | 0.245165 |
| 2965  | GPR97     | 33.28470616 | -1.976865268 | 0.326334 | -6.057794 | 1.38E-09 | 9.12E-09 |
| 5930  | SLC7A4    | 2.953742432 | -1.977039152 | 0.45909  | -4.306429 | 1.66E-05 | 5.48E-05 |
| 2616  | DRP2      | 3.807059945 | -1.977282939 | 0.310811 | -6.361679 | 2.00E-10 | 1.50E-09 |
| 4661  | ADAMDEC   | 164.1046634 | -1.980193265 | 0.399651 | -4.954803 | 7.24E-07 | 3.04E-06 |
| 8162  | GPR128    | 1.32492526  | -1.981294291 | 0.591877 | -3.347478 | 0.000816 | 0.001958 |
| 1376  | PCDHGC5   | 18.69739982 | -1.981852324 | 0.255427 | -7.758964 | 8.56E-15 | 1.22E-13 |
| 9663  | C20orf201 | 0.914911491 | -1.982029906 | 0.718119 | -2.76003  | 0.00578  | 0.011724 |
| 5010  | LGI4      | 2223.950329 | -1.982345561 | 0.415693 | -4.768777 | 1.85E-06 | 7.25E-06 |
| 1129  | FHL2      | 1404.472529 | -1.982700072 | 0.244287 | -8.116275 | 4.81E-16 | 8.34E-15 |
| 1113  | GPR133    | 40.69131458 | -1.983671621 | 0.243669 | -8.140834 | 3.93E-16 | 6.91E-15 |
| 3871  | FNFRSF13C | 3.682892339 | -1.983738342 | 0.365908 | -5.421414 | 5.91E-08 | 2.99E-07 |
| 3404  | HTR1D     | 6.581074902 | -1.984227059 | 0.345481 | -5.743372 | 9.28E-09 | 5.34E-08 |
| 8936  | KRT6A     | 6.362308909 | -1.98453843  | 0.652953 | -3.039328 | 0.002371 | 0.005201 |
| 11052 | IL22RA2   | 0.502694234 | -1.985165411 | 0.873225 | -2.273372 | 0.023004 | 0.040803 |
| 9720  | LOC731789 | 0.72073468  | -1.98720948  | 0.724716 | -2.742053 | 0.006106 | 0.012312 |
| 3583  | WNT10B    | 9.936398386 | -1.987917059 | 0.353966 | -5.616124 | 1.95E-08 | 1.07E-07 |
| 5381  | ADRB3     | 0.974212549 | -1.988154755 | 0.434407 | -4.576714 | 4.72E-06 | 1.72E-05 |

|       |           |             |              |          |           |          |          |
|-------|-----------|-------------|--------------|----------|-----------|----------|----------|
| 1374  | SRCRB4D   | 57.93172539 | -1.989249631 | 0.256276 | -7.762137 | 8.35E-15 | 1.19E-13 |
| 9900  | DLL3      | 1.753445233 | -1.990611912 | 0.740618 | -2.687772 | 0.007193 | 0.014241 |
| 6506  | TDRD5     | 3.836163728 | -1.99142826  | 0.494793 | -4.02477  | 5.70E-05 | 0.000172 |
| 15112 | MMP23A    | 0.653720511 | -1.99176468  | 2.04809  | -0.972499 | 0.330803 | 0.429067 |
| 3398  | FAM132A   | 38.79706191 | -1.993060167 | 0.346683 | -5.748934 | 8.98E-09 | 5.18E-08 |
| 3962  | FAM69C    | 3.98968744  | -1.993111919 | 0.371196 | -5.369431 | 7.90E-08 | 3.91E-07 |
| 3820  | HOXD13    | 15.92572833 | -1.997677209 | 0.366015 | -5.457914 | 4.82E-08 | 2.47E-07 |
| 7809  | MAGEA5    | 0.904520746 | -1.998195906 | 0.57126  | -3.497874 | 0.000469 | 0.001177 |
| 3224  | SYBU      | 872.3185211 | -1.999457223 | 0.340599 | -5.870422 | 4.35E-09 | 2.64E-08 |
| 12917 | FRG2B     | 0.565018622 | -1.999488058 | 1.198515 | -1.668305 | 0.095255 | 0.144546 |
| 10828 | SERPINA1  | 1.072633902 | -1.999684756 | 0.850202 | -2.352012 | 0.018672 | 0.033801 |
| 1761  | ZNF474    | 8.162932528 | -2.000814362 | 0.276701 | -7.230954 | 4.80E-13 | 5.34E-12 |
| 10110 | CES7      | 2.233115027 | -2.001158326 | 0.765679 | -2.613575 | 0.00896  | 0.017371 |
| 1710  | DLX4      | 23.64495443 | -2.001647926 | 0.274728 | -7.285924 | 3.19E-13 | 3.66E-12 |
| 1711  | E2F7      | 57.56910415 | -2.002198653 | 0.274811 | -7.285723 | 3.20E-13 | 3.67E-12 |
| 2609  | SNCG      | 535.0641895 | -2.004706875 | 0.314719 | -6.369838 | 1.89E-10 | 1.42E-09 |
| 1246  | SH2D2A    | 128.8017942 | -2.005017448 | 0.252688 | -7.934767 | 2.11E-15 | 3.32E-14 |
| 607   | SEMA4B    | 3753.637181 | -2.00748791  | 0.215926 | -9.297116 | 1.44E-20 | 4.66E-19 |
| 7017  | APOB      | 1066.513303 | -2.007873489 | 0.526158 | -3.816106 | 0.000136 | 0.000379 |
| 2769  | PCDH7     | 117.2624439 | -2.010038955 | 0.323143 | -6.220286 | 4.96E-10 | 3.51E-09 |
| 2228  | ZNF385D   | 33.19388368 | -2.011464013 | 0.299255 | -6.721568 | 1.80E-11 | 1.58E-10 |
| 4365  | CD1A      | 4.513443288 | -2.013952718 | 0.393098 | -5.123288 | 3.00E-07 | 1.35E-06 |
| 1892  | F13A1     | 1961.035321 | -2.015592253 | 0.284214 | -7.091815 | 1.32E-12 | 1.37E-11 |
| 5602  | TAS1R1    | 2.712495462 | -2.01600217  | 0.450975 | -4.470316 | 7.81E-06 | 2.73E-05 |
| 1834  | TSKU      | 1755.431325 | -2.016186819 | 0.281391 | -7.165071 | 7.77E-13 | 8.32E-12 |
| 8539  | FRMD5     | 7.64575769  | -2.017532558 | 0.631858 | -3.193014 | 0.001408 | 0.003232 |
| 655   | SP140     | 105.8103046 | -2.018798998 | 0.220459 | -9.157234 | 5.32E-20 | 1.59E-18 |
| 1046  | TMIGD2    | 9.296651566 | -2.021231707 | 0.245191 | -8.243489 | 1.67E-16 | 3.13E-15 |
| 3561  | VWA3B     | 1.830950601 | -2.021455016 | 0.359199 | -5.62767  | 1.83E-08 | 1.01E-07 |
| 1557  | ZNF683    | 46.19618081 | -2.023624476 | 0.270363 | -7.48483  | 7.16E-14 | 9.02E-13 |
| 7834  | SLC9A11   | 2.783752224 | -2.024098466 | 0.580935 | -3.484209 | 0.000494 | 0.001235 |
| 5647  | CLEC4G    | 2.242699226 | -2.025222009 | 0.455206 | -4.449025 | 8.63E-06 | 2.99E-05 |
| 6513  | MCHR1     | 396.3447361 | -2.02616003  | 0.503729 | -4.022319 | 5.76E-05 | 0.000173 |
| 590   | LRP8      | 72.14000889 | -2.026781693 | 0.216624 | -9.356238 | 8.26E-21 | 2.75E-19 |
| 20    | LGALS9    | 1311.559419 | -2.029052331 | 0.143577 | -14.13212 | 2.41E-45 | 2.36E-42 |
| 6187  | PRIMA1    | 1200.295075 | -2.030178809 | 0.485532 | -4.181351 | 2.90E-05 | 9.18E-05 |
| 1824  | CDKN2A    | 165.9589835 | -2.030200102 | 0.283235 | -7.167901 | 7.62E-13 | 8.18E-12 |
| 4980  | C20orf200 | 1.365351859 | -2.030270934 | 0.424441 | -4.783403 | 1.72E-06 | 6.78E-06 |
| 114   | TYROBP    | 1784.296246 | -2.031996895 | 0.167465 | -12.13389 | 6.98E-34 | 1.20E-31 |
| 4503  | AP3B2     | 43.77933891 | -2.032223592 | 0.403457 | -5.037033 | 4.73E-07 | 2.06E-06 |
| 2460  | SLC12A8   | 256.009844  | -2.032934773 | 0.312438 | -6.506685 | 7.68E-11 | 6.12E-10 |
| 2594  | IGFBP6    | 741.4560748 | -2.032995232 | 0.318224 | -6.388562 | 1.67E-10 | 1.27E-09 |
| 2527  | FOSL1     | 240.1830318 | -2.033323664 | 0.315677 | -6.441145 | 1.19E-10 | 9.20E-10 |
| 5759  | LEFTY2    | 6.622318914 | -2.038981249 | 0.464173 | -4.392717 | 1.12E-05 | 3.81E-05 |
| 11858 | SPRR2A    | 0.612652783 | -2.038985454 | 1.017935 | -2.003061 | 0.045171 | 0.074666 |
| 968   | DGKG      | 122.9430531 | -2.039445397 | 0.242729 | -8.402167 | 4.38E-17 | 8.88E-16 |
| 1004  | SLC11A1   | 325.1450257 | -2.039527508 | 0.244562 | -8.339521 | 7.46E-17 | 1.46E-15 |

|       |           |             |              |          |           |          |          |
|-------|-----------|-------------|--------------|----------|-----------|----------|----------|
| 10952 | RHAG      | 1.102156667 | -2.04022192  | 0.885694 | -2.30353  | 0.021249 | 0.03803  |
| 6929  | SSTR3     | 0.773331566 | -2.040715902 | 0.529831 | -3.851638 | 0.000117 | 0.000332 |
| 12399 | HAND2     | 0.703459624 | -2.041834618 | 1.11177  | -1.836561 | 0.066275 | 0.104771 |
| 3323  | IL27      | 2.456574472 | -2.041849128 | 0.351976 | -5.80111  | 6.59E-09 | 3.89E-08 |
| 10368 | PYDC1     | 1.57120065  | -2.042188198 | 0.810661 | -2.519163 | 0.011763 | 0.022239 |
| 3499  | PGF       | 4273.689417 | -2.042343568 | 0.359799 | -5.676342 | 1.38E-08 | 7.71E-08 |
| 144   | LAIR1     | 926.3263229 | -2.042614706 | 0.17512  | -11.66406 | 1.95E-31 | 2.65E-29 |
| 867   | IL21R     | 125.0348343 | -2.042701766 | 0.237341 | -8.606595 | 7.53E-18 | 1.70E-16 |
| 319   | CDCA8     | 121.3620546 | -2.044697247 | 0.195762 | -10.4448  | 1.55E-25 | 9.51E-24 |
| 1799  | HPX       | 10.39544449 | -2.050985136 | 0.285157 | -7.192479 | 6.36E-13 | 6.93E-12 |
| 1926  | MGAT3     | 654.7843926 | -2.05197842  | 0.290678 | -7.05929  | 1.67E-12 | 1.70E-11 |
| 856   | DPYSL3    | 2780.242094 | -2.052108386 | 0.23785  | -8.627759 | 6.26E-18 | 1.43E-16 |
| 8566  | SNORD15E  | 1.03636637  | -2.053120394 | 0.644635 | -3.184935 | 0.001448 | 0.003313 |
| 3376  | PTK6      | 63.66955668 | -2.053338547 | 0.35632  | -5.762618 | 8.28E-09 | 4.81E-08 |
| 14039 | CT45A2    | 0.440686433 | -2.054062469 | 1.571619 | -1.306972 | 0.191222 | 0.266981 |
| 6874  | TSPAN8    | 78.73277237 | -2.054706747 | 0.5304   | -3.87388  | 0.000107 | 0.000305 |
| 3667  | NKX3-2    | 2.054985343 | -2.055951294 | 0.369895 | -5.558206 | 2.73E-08 | 1.46E-07 |
| 31    | SH3BGRL2  | 4753.511924 | -2.056712932 | 0.150784 | -13.64017 | 2.31E-42 | 1.46E-39 |
| 173   | OLFML2B   | 1674.922561 | -2.056836514 | 0.179302 | -11.47136 | 1.84E-30 | 2.08E-28 |
| 2765  | PNPLA1    | 23.30893479 | -2.057009484 | 0.330483 | -6.224253 | 4.84E-10 | 3.43E-09 |
| 201   | GAL3ST4   | 430.4144154 | -2.057288159 | 0.183464 | -11.21359 | 3.50E-29 | 3.41E-27 |
| 1108  | TNFSF13B  | 156.7320064 | -2.057713974 | 0.252416 | -8.152071 | 3.58E-16 | 6.33E-15 |
| 1666  | VNN2      | 236.5537617 | -2.059054804 | 0.280524 | -7.340021 | 2.14E-13 | 2.51E-12 |
| 81    | TMSB10    | 29126.75151 | -2.05972749  | 0.163888 | -12.56788 | 3.17E-36 | 7.67E-34 |
| 103   | TMEM44    | 503.6637714 | -2.061422258 | 0.168533 | -12.23157 | 2.11E-34 | 4.01E-32 |
| 1446  | NUDT11    | 14.0061834  | -2.063753889 | 0.270168 | -7.638766 | 2.19E-14 | 2.97E-13 |
| 3653  | TCL1A     | 6.566343268 | -2.064010809 | 0.37067  | -5.568327 | 2.57E-08 | 1.38E-07 |
| 28    | NUDT1     | 220.5542171 | -2.064881989 | 0.149005 | -13.85784 | 1.14E-43 | 7.98E-41 |
| 2121  | PSD       | 32.37756356 | -2.06511898  | 0.302401 | -6.829068 | 8.55E-12 | 7.90E-11 |
| 3430  | PGAM2     | 114.6406229 | -2.065363348 | 0.360908 | -5.72269  | 1.05E-08 | 5.99E-08 |
| 3039  | PCSK1     | 30.61183527 | -2.066828089 | 0.344165 | -6.005339 | 1.91E-09 | 1.23E-08 |
| 3124  | ATG9B     | 58.86254674 | -2.068088224 | 0.347808 | -5.946059 | 2.75E-09 | 1.72E-08 |
| 2239  | NMB       | 843.0128294 | -2.071638698 | 0.308823 | -6.70817  | 1.97E-11 | 1.73E-10 |
| 13475 | REXO1L1   | 0.447570487 | -2.071962496 | 1.385323 | -1.495653 | 0.134744 | 0.196001 |
| 1530  | CELSR3    | 68.36980464 | -2.074919606 | 0.276077 | -7.515717 | 5.66E-14 | 7.25E-13 |
| 557   | LILRB4    | 492.683216  | -2.076076261 | 0.219852 | -9.443046 | 3.62E-21 | 1.27E-19 |
| 8502  | SHD       | 0.688377417 | -2.076824302 | 0.647816 | -3.205884 | 0.001346 | 0.003104 |
| 2994  | PDCD1     | 112.5298961 | -2.076949169 | 0.343751 | -6.042023 | 1.52E-09 | 9.96E-09 |
| 3546  | FAM178B   | 2.091889685 | -2.077795838 | 0.368432 | -5.63956  | 1.70E-08 | 9.42E-08 |
| 416   | CCNB2     | 123.0354925 | -2.07804129  | 0.208265 | -9.977854 | 1.91E-23 | 8.98E-22 |
| 2036  | PRG4      | 11.23449616 | -2.079472098 | 0.300394 | -6.922476 | 4.44E-12 | 4.27E-11 |
| 8908  | LY6D      | 0.998067188 | -2.085130304 | 0.683959 | -3.048621 | 0.002299 | 0.005059 |
| 12703 | C20orf123 | 0.422241442 | -2.085194715 | 1.203104 | -1.733179 | 0.083064 | 0.128169 |
| 2078  | PPAP2C    | 175.5998119 | -2.086090805 | 0.3035   | -6.873445 | 6.27E-12 | 5.91E-11 |
| 10505 | CRNA00230 | 5.849485989 | -2.086193124 | 0.844577 | -2.470105 | 0.013507 | 0.025203 |
| 6647  | SLC34A2   | 1416.536327 | -2.086551716 | 0.52645  | -3.963439 | 7.39E-05 | 0.000218 |
| 2613  | SPIB      | 16.47056406 | -2.087084154 | 0.327959 | -6.363863 | 1.97E-10 | 1.48E-09 |

|       |           |             |              |          |           |          |          |
|-------|-----------|-------------|--------------|----------|-----------|----------|----------|
| 14647 | MAGEA1    | 0.454859047 | -2.087959756 | 1.867665 | -1.117952 | 0.263588 | 0.352716 |
| 1829  | ZBP1      | 45.95151049 | -2.088740215 | 0.291503 | -7.165418 | 7.75E-13 | 8.31E-12 |
| 1492  | SPC24     | 10.32175607 | -2.09349778  | 0.276033 | -7.584219 | 3.34E-14 | 4.39E-13 |
| 307   | TPX2      | 451.4910376 | -2.093926565 | 0.199307 | -10.50605 | 8.10E-26 | 5.17E-24 |
| 10155 | SYT4      | 0.881302556 | -2.094669642 | 0.806459 | -2.597368 | 0.009394 | 0.018132 |
| 2641  | BMPER     | 29.60051961 | -2.095182109 | 0.330826 | -6.333193 | 2.40E-10 | 1.78E-09 |
| 498   | HAPLN3    | 249.7675729 | -2.098293809 | 0.217866 | -9.631117 | 5.91E-22 | 2.33E-20 |
| 2004  | SMOC2     | 1057.634886 | -2.099717891 | 0.301987 | -6.952998 | 3.58E-12 | 3.50E-11 |
| 2752  | MOXD1     | 447.5012035 | -2.099928612 | 0.336631 | -6.23808  | 4.43E-10 | 3.16E-09 |
| 4286  | PDGFRA    | 574.3970563 | -2.101900198 | 0.407086 | -5.163287 | 2.43E-07 | 1.11E-06 |
| 4631  | CACNA1G   | 2.466696531 | -2.103515953 | 0.422943 | -4.973524 | 6.57E-07 | 2.78E-06 |
| 396   | C9orf110  | 78.9210367  | -2.103548674 | 0.209261 | -10.05226 | 8.98E-24 | 4.44E-22 |
| 1353  | MDFI      | 79.62348673 | -2.10372972  | 0.269891 | -7.794749 | 6.45E-15 | 9.35E-14 |
| 437   | GTSE1     | 97.203229   | -2.104363247 | 0.213209 | -9.869974 | 5.62E-23 | 2.52E-21 |
| 825   | FCGR2B    | 351.451872  | -2.105109832 | 0.241959 | -8.700274 | 3.31E-18 | 7.87E-17 |
| 916   | HK3       | 140.7664186 | -2.105963467 | 0.247929 | -8.494221 | 1.99E-17 | 4.26E-16 |
| 652   | CEP55     | 164.7507012 | -2.106097205 | 0.229759 | -9.166552 | 4.88E-20 | 1.47E-18 |
| 598   | GPR153    | 205.1198845 | -2.106596472 | 0.225869 | -9.326634 | 1.09E-20 | 3.58E-19 |
| 3123  | DLK2      | 35.36865996 | -2.107794865 | 0.354429 | -5.947023 | 2.73E-09 | 1.71E-08 |
| 887   | LOC606724 | 49.18504268 | -2.107935779 | 0.246442 | -8.553492 | 1.19E-17 | 2.64E-16 |
| 7151  | FAM83A    | 1.144183997 | -2.109964109 | 0.560522 | -3.764287 | 0.000167 | 0.000458 |
| 2341  | CR1       | 154.7842315 | -2.110098764 | 0.318954 | -6.615678 | 3.70E-11 | 3.10E-10 |
| 2427  | SIX2      | 15.43821065 | -2.110667169 | 0.32296  | -6.53539  | 6.34E-11 | 5.12E-10 |
| 706   | MYO1G     | 424.7884442 | -2.110940862 | 0.234582 | -8.998752 | 2.28E-19 | 6.34E-18 |
| 10557 | THEG      | 0.543563393 | -2.112009752 | 0.862106 | -2.449825 | 0.014293 | 0.026537 |
| 145   | CD14      | 2879.298571 | -2.112101641 | 0.181106 | -11.66223 | 1.99E-31 | 2.69E-29 |
| 3918  | SIRPD     | 2.389995505 | -2.112282829 | 0.391793 | -5.391321 | 6.99E-08 | 3.50E-07 |
| 1927  | LIF       | 1119.587697 | -2.112509501 | 0.299289 | -7.058425 | 1.68E-12 | 1.71E-11 |
| 86    | NUMBL     | 287.523387  | -2.115645168 | 0.169142 | -12.50809 | 6.74E-36 | 1.54E-33 |
| 9120  | ZIC5      | 8.800717552 | -2.116520708 | 0.71278  | -2.96939  | 0.002984 | 0.006413 |
| 11568 | PDCL2     | 0.433967844 | -2.11796118  | 1.011994 | -2.09286  | 0.036362 | 0.061612 |
| 8939  | GPR112    | 1.815702752 | -2.119199216 | 0.697671 | -3.037532 | 0.002385 | 0.00523  |
| 2484  | OTOF      | 6.949189558 | -2.119548346 | 0.326837 | -6.485037 | 8.87E-11 | 7.00E-10 |
| 4169  | GRIN2A    | 328.7224979 | -2.119848348 | 0.404827 | -5.236433 | 1.64E-07 | 7.70E-07 |
| 569   | PRSS53    | 89.65392966 | -2.120159951 | 0.225396 | -9.406376 | 5.14E-21 | 1.77E-19 |
| 770   | ARL4C     | 2938.579274 | -2.121145569 | 0.240147 | -8.832689 | 1.02E-18 | 2.60E-17 |
| 3192  | GPRC5A    | 264.6653582 | -2.123260921 | 0.360608 | -5.88801  | 3.91E-09 | 2.40E-08 |
| 2172  | TBC1D3C   | 45.23044679 | -2.123691801 | 0.312798 | -6.789329 | 1.13E-11 | 1.02E-10 |
| 225   | OLFML3    | 1012.925911 | -2.124294952 | 0.193173 | -10.99683 | 3.96E-28 | 3.45E-26 |
| 2282  | C4orf48   | 22.84680344 | -2.124652249 | 0.318558 | -6.669591 | 2.57E-11 | 2.20E-10 |
| 6923  | NPW       | 1.060687005 | -2.125882313 | 0.551455 | -3.85504  | 0.000116 | 0.000328 |
| 5750  | PTPRZ1    | 4.472073434 | -2.126956468 | 0.483709 | -4.397185 | 1.10E-05 | 3.74E-05 |
| 6827  | LEP       | 5.991517086 | -2.130192191 | 0.547793 | -3.888684 | 0.000101 | 0.000289 |
| 395   | FOLR2     | 586.1328465 | -2.132285409 | 0.211953 | -10.0602  | 8.28E-24 | 4.11E-22 |
| 3374  | C19orf59  | 14.59481359 | -2.133503217 | 0.370139 | -5.764052 | 8.21E-09 | 4.77E-08 |
| 4762  | GBX2      | 1.840672013 | -2.137219955 | 0.435844 | -4.903636 | 9.41E-07 | 3.87E-06 |
| 759   | CLEC11A   | 297.6626505 | -2.137579964 | 0.241157 | -8.863857 | 7.73E-19 | 2.00E-17 |



|       |           |             |              |          |           |          |          |
|-------|-----------|-------------|--------------|----------|-----------|----------|----------|
| 1798  | MYLK2     | 5.617662114 | -2.137789377 | 0.297164 | -7.193972 | 6.29E-13 | 6.86E-12 |
| 8626  | AADAC     | 0.712780558 | -2.139774053 | 0.676505 | -3.162983 | 0.001562 | 0.003548 |
| 4260  | TSKS      | 2.454970217 | -2.141398198 | 0.413595 | -5.177525 | 2.25E-07 | 1.03E-06 |
| 4962  | TPRXL     | 1.369049571 | -2.143310768 | 0.447289 | -4.79178  | 1.65E-06 | 6.53E-06 |
| 6207  | GPR115    | 25.4998657  | -2.144116559 | 0.513735 | -4.173588 | 3.00E-05 | 9.47E-05 |
| 932   | ASCL2     | 23.43711667 | -2.146971181 | 0.253254 | -8.477537 | 2.30E-17 | 4.84E-16 |
| 223   | RCC1      | 452.9939328 | -2.150139025 | 0.195259 | -11.01175 | 3.35E-28 | 2.95E-26 |
| 1982  | TBX18     | 37.78652439 | -2.150698168 | 0.307811 | -6.987067 | 2.81E-12 | 2.78E-11 |
| 896   | C5orf62   | 2150.007216 | -2.150869296 | 0.252076 | -8.532631 | 1.43E-17 | 3.13E-16 |
| 6218  | IFNE      | 4.855231264 | -2.152698886 | 0.516266 | -4.169748 | 3.05E-05 | 9.61E-05 |
| 3372  | BPI       | 5.065411338 | -2.154951444 | 0.373712 | -5.766347 | 8.10E-09 | 4.71E-08 |
| 3943  | OMD       | 40.02824424 | -2.155302845 | 0.400765 | -5.377978 | 7.53E-08 | 3.74E-07 |
| 782   | LAT       | 314.5611051 | -2.156357773 | 0.244884 | -8.805637 | 1.30E-18 | 3.26E-17 |
| 5871  | VWA3A     | 5.147555838 | -2.157355892 | 0.497481 | -4.336557 | 1.45E-05 | 4.83E-05 |
| 4435  | LOC729467 | 1.867862501 | -2.158043531 | 0.424679 | -5.081593 | 3.74E-07 | 1.65E-06 |
| 3126  | ALOX15B   | 102.2517502 | -2.158697193 | 0.363077 | -5.945561 | 2.76E-09 | 1.73E-08 |
| 4822  | SLC8A2    | 4.322255262 | -2.16118472  | 0.442939 | -4.879196 | 1.07E-06 | 4.33E-06 |
| 33    | MMP19     | 450.9055907 | -2.161481204 | 0.160092 | -13.50146 | 1.53E-41 | 9.11E-39 |
| 3746  | KCNH3     | 16.3142777  | -2.162857297 | 0.392592 | -5.509177 | 3.61E-08 | 1.89E-07 |
| 275   | TREM2     | 606.165395  | -2.163624486 | 0.202025 | -10.70968 | 9.17E-27 | 6.53E-25 |
| 1008  | SPHK1     | 189.9149317 | -2.164639778 | 0.259808 | -8.331679 | 7.97E-17 | 1.55E-15 |
| 3456  | GPR158    | 8.616085136 | -2.169380534 | 0.380356 | -5.70355  | 1.17E-08 | 6.65E-08 |
| 8418  | C4BPA     | 15.81386415 | -2.169763661 | 0.66899  | -3.243345 | 0.001181 | 0.002751 |
| 2486  | WBSCR26   | 26.42847509 | -2.170425869 | 0.334702 | -6.48466  | 8.89E-11 | 7.01E-10 |
| 1040  | SFRP4     | 394.2287859 | -2.17066894  | 0.262901 | -8.256604 | 1.50E-16 | 2.82E-15 |
| 2148  | FAIM2     | 22.85138004 | -2.171193098 | 0.318816 | -6.810172 | 9.75E-12 | 8.90E-11 |
| 9835  | SPRR3     | 1.048267793 | -2.171551266 | 0.801979 | -2.707742 | 0.006774 | 0.013501 |
| 9322  | CYP2C19   | 0.763076738 | -2.174157473 | 0.75176  | -2.892088 | 0.003827 | 0.008047 |
| 10231 | FCRL4     | 0.596864138 | -2.174178499 | 0.845536 | -2.571361 | 0.01013  | 0.019407 |
| 1473  | FAM90A1   | 24.32992179 | -2.174262906 | 0.285871 | -7.605746 | 2.83E-14 | 3.77E-13 |
| 1674  | TM7SF4    | 11.15137282 | -2.178822224 | 0.297158 | -7.332196 | 2.26E-13 | 2.65E-12 |
| 2060  | LAG3      | 221.3914447 | -2.179575521 | 0.316421 | -6.888204 | 5.65E-12 | 5.38E-11 |
| 101   | JAK3      | 728.2834473 | -2.180073768 | 0.177219 | -12.30161 | 8.88E-35 | 1.72E-32 |
| 95    | CEBPB     | 1447.897386 | -2.180589894 | 0.175881 | -12.39811 | 2.68E-35 | 5.52E-33 |
| 5077  | EPHA10    | 32.62843822 | -2.184868773 | 0.461577 | -4.733483 | 2.21E-06 | 8.52E-06 |
| 4890  | GDF10     | 8.560487414 | -2.188437554 | 0.452793 | -4.833196 | 1.34E-06 | 5.39E-06 |
| 300   | MMP11     | 672.2418718 | -2.193607149 | 0.208112 | -10.5405  | 5.62E-26 | 3.67E-24 |
| 459   | LOC728875 | 65.83858415 | -2.194794506 | 0.224785 | -9.763973 | 1.61E-22 | 6.86E-21 |
| 4422  | MYBPC2    | 10.77687582 | -2.196220206 | 0.431553 | -5.089113 | 3.60E-07 | 1.59E-06 |
| 13522 | MAGEA4    | 0.485149478 | -2.198599859 | 1.484349 | -1.481188 | 0.138556 | 0.200854 |
| 2691  | CARD14    | 113.1607804 | -2.199982801 | 0.349776 | -6.289693 | 3.18E-10 | 2.32E-09 |
| 110   | C17orf60  | 32.14873243 | -2.200906748 | 0.180445 | -12.1971  | 3.22E-34 | 5.74E-32 |
| 1939  | CD38      | 95.767914   | -2.201729616 | 0.312602 | -7.043225 | 1.88E-12 | 1.90E-11 |
| 762   | CENPA     | 39.84851206 | -2.201792815 | 0.248615 | -8.856244 | 8.28E-19 | 2.13E-17 |
| 219   | KIF4A     | 141.8643316 | -2.202388272 | 0.199796 | -11.02321 | 2.95E-28 | 2.64E-26 |
| 7942  | CYP2W1    | 2.181693979 | -2.202652641 | 0.641794 | -3.432024 | 0.000599 | 0.001479 |
| 3295  | C6orf141  | 19.962014   | -2.205850287 | 0.379053 | -5.819368 | 5.91E-09 | 3.51E-08 |

|      |           |             |              |          |           |          |          |
|------|-----------|-------------|--------------|----------|-----------|----------|----------|
| 1486 | RGS4      | 182.7120414 | -2.207091108 | 0.29068  | -7.592856 | 3.13E-14 | 4.13E-13 |
| 4958 | WDR69     | 4.06692248  | -2.207614886 | 0.460587 | -4.793048 | 1.64E-06 | 6.49E-06 |
| 2331 | C8orf31   | 23.90616283 | -2.20969118  | 0.333571 | -6.624349 | 3.49E-11 | 2.93E-10 |
| 7172 | LHB       | 1.020047628 | -2.211085824 | 0.588766 | -3.755461 | 0.000173 | 0.000473 |
| 252  | P2RY6     | 143.7657034 | -2.211584418 | 0.204282 | -10.82612 | 2.59E-27 | 2.01E-25 |
| 2369 | RLTPR     | 65.88560873 | -2.211969189 | 0.335705 | -6.58903  | 4.43E-11 | 3.66E-10 |
| 4447 | SULT2B1   | 22.70922273 | -2.214075197 | 0.436335 | -5.074259 | 3.89E-07 | 1.71E-06 |
| 1636 | ADAMTS1   | 82.77159902 | -2.214455669 | 0.300002 | -7.381464 | 1.57E-13 | 1.88E-12 |
| 340  | CRNA0015  | 421.2934132 | -2.214609652 | 0.213944 | -10.35134 | 4.13E-25 | 2.38E-23 |
| 2692 | MEGF10    | 6.327211116 | -2.216942449 | 0.352574 | -6.287881 | 3.22E-10 | 2.34E-09 |
| 9964 | GOLGA8E   | 0.648254584 | -2.220370641 | 0.833143 | -2.665054 | 0.007698 | 0.015143 |
| 1360 | COL8A2    | 242.7813253 | -2.225138397 | 0.286061 | -7.778557 | 7.34E-15 | 1.06E-13 |
| 9477 | DMBX1     | 3.003317978 | -2.225673519 | 0.787391 | -2.826645 | 0.004704 | 0.009729 |
| 7572 | WFDC13    | 0.552853294 | -2.227112299 | 0.620494 | -3.589254 | 0.000332 | 0.000858 |
| 2081 | PLA2G5    | 15.41051572 | -2.227584347 | 0.324313 | -6.868631 | 6.48E-12 | 6.10E-11 |
| 1391 | SPEG      | 69.59290202 | -2.228328484 | 0.288406 | -7.726368 | 1.11E-14 | 1.56E-13 |
| 262  | PLAU      | 1339.115223 | -2.228490775 | 0.206793 | -10.77641 | 4.45E-27 | 3.33E-25 |
| 766  | HOXD11    | 85.33781489 | -2.228770095 | 0.252016 | -8.843748 | 9.26E-19 | 2.37E-17 |
| 5616 | CHRD1     | 142.3616743 | -2.228817679 | 0.499179 | -4.46497  | 8.01E-06 | 2.79E-05 |
| 1928 | H19       | 3814.403797 | -2.229643837 | 0.315909 | -7.057864 | 1.69E-12 | 1.72E-11 |
| 2770 | BTBD16    | 56.84481953 | -2.230088896 | 0.358523 | -6.220208 | 4.96E-10 | 3.51E-09 |
| 2131 | ZBED2     | 28.29665457 | -2.233817428 | 0.327381 | -6.823296 | 8.90E-12 | 8.18E-11 |
| 1054 | C3        | 42520.39258 | -2.233827863 | 0.271175 | -8.23758  | 1.76E-16 | 3.27E-15 |
| 3500 | REEP2     | 49.29715723 | -2.237088288 | 0.394147 | -5.675776 | 1.38E-08 | 7.73E-08 |
| 4595 | DPEP3     | 2.208275788 | -2.241607864 | 0.44919  | -4.990336 | 6.03E-07 | 2.57E-06 |
| 2062 | TMEM45A   | 1437.695059 | -2.246274697 | 0.326173 | -6.88675  | 5.71E-12 | 5.43E-11 |
| 3938 | IL13RA2   | 76.28917216 | -2.246281498 | 0.417516 | -5.380104 | 7.44E-08 | 3.71E-07 |
| 3277 | ZDHHC19   | 2.373904248 | -2.247427785 | 0.385405 | -5.831337 | 5.50E-09 | 3.29E-08 |
| 6117 | MMP10     | 5.403472776 | -2.247556796 | 0.533521 | -4.212684 | 2.52E-05 | 8.09E-05 |
| 1533 | ANKRD35   | 20.41697602 | -2.248602842 | 0.299223 | -7.514808 | 5.70E-14 | 7.29E-13 |
| 9811 | CACNG6    | 0.702987343 | -2.249271009 | 0.828865 | -2.713674 | 0.006654 | 0.013294 |
| 523  | ITGB4     | 1479.892788 | -2.253913403 | 0.236383 | -9.534999 | 1.50E-21 | 5.62E-20 |
| 2185 | MT1M      | 57.10993524 | -2.256008613 | 0.333063 | -6.773523 | 1.26E-11 | 1.13E-10 |
| 5030 | ZNF114    | 109.645402  | -2.25662623  | 0.474069 | -4.760119 | 1.93E-06 | 7.54E-06 |
| 6191 | LOC729156 | 10.6523382  | -2.256644412 | 0.539915 | -4.179629 | 2.92E-05 | 9.24E-05 |
| 152  | FOXM1     | 371.3879447 | -2.258573014 | 0.194426 | -11.61664 | 3.39E-31 | 4.37E-29 |
| 4955 | CLIC6     | 517.7949627 | -2.259107444 | 0.471253 | -4.793836 | 1.64E-06 | 6.47E-06 |
| 960  | BASP1     | 653.1093704 | -2.260742641 | 0.268272 | -8.427065 | 3.54E-17 | 7.24E-16 |
| 5831 | NPAS4     | 1.695869903 | -2.261852665 | 0.519269 | -4.355844 | 1.33E-05 | 4.46E-05 |
| 4250 | CXCL13    | 215.929984  | -2.261945151 | 0.436502 | -5.181976 | 2.20E-07 | 1.01E-06 |
| 837  | IL1RN     | 93.64417407 | -2.262435174 | 0.261323 | -8.657623 | 4.82E-18 | 1.13E-16 |
| 1757 | BCL2L15   | 31.05690731 | -2.262790255 | 0.312713 | -7.235986 | 4.62E-13 | 5.16E-12 |
| 3217 | LY6H      | 65.78343973 | -2.265188218 | 0.385476 | -5.876344 | 4.19E-09 | 2.56E-08 |
| 217  | C15orf42  | 48.43358427 | -2.266716337 | 0.205301 | -11.04096 | 2.42E-28 | 2.19E-26 |
| 3103 | LRRC4C    | 35.22180022 | -2.267956798 | 0.380375 | -5.962426 | 2.49E-09 | 1.57E-08 |
| 9338 | TAC1      | 1.326651232 | -2.268871616 | 0.786839 | -2.883526 | 0.003933 | 0.008255 |
| 737  | TRIB3     | 2105.02475  | -2.268930323 | 0.254331 | -8.921187 | 4.61E-19 | 1.23E-17 |

|       |           |             |              |          |           |          |          |
|-------|-----------|-------------|--------------|----------|-----------|----------|----------|
| 563   | S100A4    | 1874.690226 | -2.269094452 | 0.240596 | -9.431137 | 4.06E-21 | 1.41E-19 |
| 3608  | CRABP2    | 111.85482   | -2.272497695 | 0.405551 | -5.603486 | 2.10E-08 | 1.14E-07 |
| 8636  | LOC642587 | 1.259374701 | -2.273920866 | 0.720036 | -3.158066 | 0.001588 | 0.003604 |
| 835   | LTB       | 203.9538344 | -2.275346739 | 0.262521 | -8.667308 | 4.42E-18 | 1.04E-16 |
| 345   | C2orf27A  | 40.97589701 | -2.275387844 | 0.220613 | -10.31394 | 6.10E-25 | 3.46E-23 |
| 213   | FCGR1C    | 98.06797796 | -2.275478736 | 0.205436 | -11.07634 | 1.63E-28 | 1.50E-26 |
| 5926  | GOLGA8D1  | 0.933018683 | -2.27562691  | 0.528198 | -4.308285 | 1.65E-05 | 5.44E-05 |
| 238   | LGALS9C   | 19.92211594 | -2.276492585 | 0.208164 | -10.93606 | 7.75E-28 | 6.38E-26 |
| 5301  | ACTBL2    | 4.470984518 | -2.277905389 | 0.492926 | -4.621191 | 3.82E-06 | 1.41E-05 |
| 139   | FCGR1B    | 265.6535998 | -2.278027851 | 0.193998 | -11.74256 | 7.71E-32 | 1.09E-29 |
| 4683  | LGALS12   | 146.8020528 | -2.278586373 | 0.461307 | -4.939416 | 7.84E-07 | 3.28E-06 |
| 803   | SYN1      | 62.85176511 | -2.281702428 | 0.260784 | -8.7494   | 2.14E-18 | 5.24E-17 |
| 515   | BATF      | 82.79148033 | -2.282001981 | 0.239113 | -9.543611 | 1.38E-21 | 5.24E-20 |
| 10324 | SERPINB3  | 0.742078172 | -2.282126096 | 0.898825 | -2.53901  | 0.011117 | 0.021106 |
| 954   | PPP1R14A  | 144.6895208 | -2.283290848 | 0.270518 | -8.440452 | 3.16E-17 | 6.49E-16 |
| 167   | CD72      | 170.5449922 | -2.284605613 | 0.197772 | -11.55171 | 7.24E-31 | 8.49E-29 |
| 2350  | KRT17     | 49.9839047  | -2.286147701 | 0.345917 | -6.608942 | 3.87E-11 | 3.23E-10 |
| 346   | VMO1      | 76.51624453 | -2.287157818 | 0.221884 | -10.30792 | 6.49E-25 | 3.68E-23 |
| 2111  | ABCA17P   | 51.86287405 | -2.289022604 | 0.33486  | -6.835761 | 8.16E-12 | 7.57E-11 |
| 4149  | SP5       | 37.02736806 | -2.28915814  | 0.435852 | -5.252149 | 1.50E-07 | 7.10E-07 |
| 5163  | LOC339674 | 1.437001511 | -2.28951669  | 0.487856 | -4.693014 | 2.69E-06 | 1.02E-05 |
| 5067  | SLC6A7    | 1.156992761 | -2.290982847 | 0.483466 | -4.738665 | 2.15E-06 | 8.32E-06 |
| 15279 | TGM7      | 0.457536956 | -2.291418732 | 2.474214 | -0.92612  | 0.354384 | 0.454629 |
| 3722  | SHC3      | 5.236940868 | -2.294692444 | 0.415392 | -5.524159 | 3.31E-08 | 1.74E-07 |
| 140   | C1QC      | 5012.356969 | -2.29478333  | 0.195859 | -11.71649 | 1.05E-31 | 1.47E-29 |
| 646   | INHBA     | 153.5768266 | -2.295598456 | 0.250281 | -9.17209  | 4.64E-20 | 1.41E-18 |
| 254   | CERCAM    | 1446.496571 | -2.297249702 | 0.21233  | -10.81925 | 2.79E-27 | 2.15E-25 |
| 2113  | SERPINA1  | 51702.96246 | -2.297999573 | 0.336275 | -6.833697 | 8.28E-12 | 7.68E-11 |
| 2714  | TWIST2    | 5.132212694 | -2.298286068 | 0.366744 | -6.266731 | 3.69E-10 | 2.66E-09 |
| 1189  | SLCO5A1   | 6.774153855 | -2.299065467 | 0.286378 | -8.028083 | 9.90E-16 | 1.63E-14 |
| 4859  | ALX1      | 5.370762184 | -2.301385484 | 0.473663 | -4.858697 | 1.18E-06 | 4.77E-06 |
| 4156  | CP        | 16700.28664 | -2.302765249 | 0.43886  | -5.247148 | 1.54E-07 | 7.29E-07 |
| 4307  | C13orf16  | 3.367032573 | -2.303865405 | 0.446991 | -5.154167 | 2.55E-07 | 1.16E-06 |
| 3755  | HFE2      | 3.657990127 | -2.30395737  | 0.418633 | -5.503528 | 3.72E-08 | 1.94E-07 |
| 2726  | ADRA1D    | 5.46654097  | -2.304988116 | 0.368278 | -6.258823 | 3.88E-10 | 2.79E-09 |
| 503   | CACNA2D4  | 164.5878623 | -2.305672493 | 0.240192 | -9.599307 | 8.05E-22 | 3.14E-20 |
| 4043  | CDHR1     | 575.3721958 | -2.306286954 | 0.434272 | -5.310695 | 1.09E-07 | 5.29E-07 |
| 1880  | ZNF365    | 72.49226911 | -2.309896657 | 0.324961 | -7.108232 | 1.18E-12 | 1.23E-11 |
| 6121  | LRIT2     | 2.589984019 | -2.31324299  | 0.549311 | -4.211172 | 2.54E-05 | 8.14E-05 |
| 334   | FKBP10    | 5697.926873 | -2.313246318 | 0.222734 | -10.38571 | 2.88E-25 | 1.69E-23 |
| 512   | FAM128A   | 1012.005667 | -2.315718046 | 0.242248 | -9.559287 | 1.19E-21 | 4.54E-20 |
| 406   | MEIS3     | 145.3288872 | -2.317206296 | 0.231339 | -10.01651 | 1.29E-23 | 6.24E-22 |
| 876   | FOXP3     | 47.24368085 | -2.317393696 | 0.270131 | -8.578769 | 9.59E-18 | 2.15E-16 |
| 461   | NBL1      | 3070.120923 | -2.317482921 | 0.237375 | -9.762962 | 1.62E-22 | 6.90E-21 |
| 14240 | VSTM2A    | 0.465898416 | -2.317643678 | 1.862642 | -1.244278 | 0.213397 | 0.293736 |
| 4319  | DKKL1     | 1.465844498 | -2.318588801 | 0.450514 | -5.146535 | 2.65E-07 | 1.20E-06 |
| 3518  | TMEM92    | 234.1863018 | -2.319601999 | 0.409941 | -5.658378 | 1.53E-08 | 8.51E-08 |

|       |           |             |              |          |           |          |          |
|-------|-----------|-------------|--------------|----------|-----------|----------|----------|
| 685   | CD163L1   | 164.382037  | -2.320836812 | 0.256527 | -9.04713  | 1.47E-19 | 4.20E-18 |
| 633   | EPR1      | 107.7321964 | -2.32172356  | 0.252277 | -9.203063 | 3.48E-20 | 1.08E-18 |
| 1048  | GSDMA     | 21.0939734  | -2.326013731 | 0.282217 | -8.241929 | 1.69E-16 | 3.17E-15 |
| 351   | IQGAP3    | 240.6571788 | -2.327526301 | 0.226528 | -10.27478 | 9.16E-25 | 5.11E-23 |
| 6924  | SPATA22   | 4.849166609 | -2.32839036  | 0.604009 | -3.854896 | 0.000116 | 0.000328 |
| 558   | EMR1      | 92.44068716 | -2.332111555 | 0.246984 | -9.442376 | 3.64E-21 | 1.28E-19 |
| 6747  | C20orf56  | 1.103167234 | -2.335148827 | 0.595587 | -3.920751 | 8.83E-05 | 0.000256 |
| 1762  | P4HA3     | 353.2556531 | -2.336229786 | 0.323119 | -7.230241 | 4.82E-13 | 5.36E-12 |
| 449   | C7orf61   | 6.709175771 | -2.336438796 | 0.238147 | -9.810908 | 1.01E-22 | 4.41E-21 |
| 2564  | GNASAS    | 3.260372301 | -2.336778396 | 0.364352 | -6.413527 | 1.42E-10 | 1.09E-09 |
| 1775  | UPK2      | 2.997957641 | -2.337089509 | 0.324045 | -7.212244 | 5.50E-13 | 6.08E-12 |
| 717   | CD7       | 200.7931824 | -2.337134915 | 0.26052  | -8.971054 | 2.94E-19 | 8.03E-18 |
| 1637  | APOC2     | 336.7766976 | -2.339118577 | 0.316946 | -7.380191 | 1.58E-13 | 1.89E-12 |
| 499   | EPHB2     | 182.3320365 | -2.339192558 | 0.2431   | -9.622364 | 6.43E-22 | 2.53E-20 |
| 1917  | GNB3      | 15.75949825 | -2.339740902 | 0.330832 | -7.072302 | 1.52E-12 | 1.56E-11 |
| 4360  | PRSS21    | 2.976087977 | -2.340462419 | 0.456542 | -5.126499 | 2.95E-07 | 1.33E-06 |
| 1881  | GPR45     | 2.771536901 | -2.344985283 | 0.329981 | -7.106422 | 1.19E-12 | 1.24E-11 |
| 11018 | FOXB1     | 0.504220659 | -2.346280165 | 1.027028 | -2.284533 | 0.02234  | 0.039743 |
| 7326  | LOC283761 | 1.691180291 | -2.346692063 | 0.636084 | -3.689278 | 0.000225 | 0.000602 |
| 6326  | PPP1R1A   | 1416.709223 | -2.348143999 | 0.570627 | -4.115024 | 3.87E-05 | 0.00012  |
| 2670  | GCK       | 7.286789779 | -2.348555959 | 0.372095 | -6.311716 | 2.76E-10 | 2.03E-09 |
| 653   | ANLN      | 396.9373167 | -2.348907235 | 0.256283 | -9.165298 | 4.94E-20 | 1.48E-18 |
| 1328  | TRPM8     | 9.886980049 | -2.351385804 | 0.300383 | -7.827966 | 4.96E-15 | 7.32E-14 |
| 2157  | DMP1      | 3.383554341 | -2.352293323 | 0.34567  | -6.80502  | 1.01E-11 | 9.18E-11 |
| 5262  | CDK5R2    | 7.030487889 | -2.352362069 | 0.506416 | -4.645115 | 3.40E-06 | 1.27E-05 |
| 4840  | TNFRSF17  | 24.5150112  | -2.352586645 | 0.483068 | -4.870089 | 1.12E-06 | 4.52E-06 |
| 94    | ADA       | 348.7396412 | -2.353152384 | 0.189649 | -12.40793 | 2.37E-35 | 4.94E-33 |
| 3328  | PANX2     | 57.71397634 | -2.355039686 | 0.406251 | -5.797007 | 6.75E-09 | 3.98E-08 |
| 2118  | KLHL35    | 8.344926423 | -2.357243214 | 0.34509  | -6.830816 | 8.44E-12 | 7.81E-11 |
| 10121 | HS3ST4    | 0.670436206 | -2.357497162 | 0.903752 | -2.608566 | 0.009092 | 0.017609 |
| 4800  | FAM19A3   | 3.203902854 | -2.358130477 | 0.482517 | -4.88715  | 1.02E-06 | 4.18E-06 |
| 2260  | RUFY4     | 18.12172626 | -2.358765162 | 0.352648 | -6.688724 | 2.25E-11 | 1.95E-10 |
| 2465  | FOXH1     | 6.90780787  | -2.360569021 | 0.362925 | -6.504294 | 7.81E-11 | 6.21E-10 |
| 26    | LGALS1    | 7099.418345 | -2.360988163 | 0.1693   | -13.94558 | 3.35E-44 | 2.52E-41 |
| 661   | RNASET2   | 6512.788707 | -2.362308243 | 0.258489 | -9.138928 | 6.31E-20 | 1.87E-18 |
| 1386  | LOC654433 | 128.9252983 | -2.365239453 | 0.305869 | -7.732857 | 1.05E-14 | 1.49E-13 |
| 4135  | CATSPERE  | 6.363025727 | -2.365431119 | 0.449669 | -5.260385 | 1.44E-07 | 6.81E-07 |
| 4624  | MUC16     | 9.72191211  | -2.365651667 | 0.475184 | -4.97839  | 6.41E-07 | 2.72E-06 |
| 228   | SIGLEC1   | 599.5638928 | -2.365927226 | 0.21535  | -10.98641 | 4.44E-28 | 3.82E-26 |
| 4396  | PEX5L     | 12.5351086  | -2.367224071 | 0.463539 | -5.106854 | 3.28E-07 | 1.46E-06 |
| 8414  | FAM5C     | 1.03062646  | -2.369860578 | 0.73044  | -3.244428 | 0.001177 | 0.002742 |
| 3424  | SCARA5    | 10.67339359 | -2.369997295 | 0.413925 | -5.72567  | 1.03E-08 | 5.90E-08 |
| 1128  | APBA2     | 95.20055679 | -2.371904531 | 0.292242 | -8.116224 | 4.81E-16 | 8.34E-15 |
| 3737  | CCL18     | 271.6045134 | -2.372358056 | 0.430235 | -5.514099 | 3.51E-08 | 1.84E-07 |
| 5835  | SERPINA4  | 21.83513599 | -2.376092345 | 0.545661 | -4.354518 | 1.33E-05 | 4.48E-05 |
| 107   | C1QB      | 6377.491931 | -2.378248786 | 0.194714 | -12.21409 | 2.61E-34 | 4.70E-32 |
| 3031  | ADAM23    | 30.92479912 | -2.380540406 | 0.396084 | -6.010196 | 1.85E-09 | 1.20E-08 |

|       |           |             |              |          |           |          |          |
|-------|-----------|-------------|--------------|----------|-----------|----------|----------|
| 10431 | OR2AT4    | 0.611201819 | -2.380542726 | 0.952298 | -2.499786 | 0.012427 | 0.023351 |
| 2585  | VNN3      | 7.988155062 | -2.381858723 | 0.372377 | -6.396362 | 1.59E-10 | 1.21E-09 |
| 3775  | ARL9      | 3.842398777 | -2.384778417 | 0.434468 | -5.488963 | 4.04E-08 | 2.10E-07 |
| 1002  | DISP2     | 40.01331467 | -2.389082932 | 0.286391 | -8.342033 | 7.30E-17 | 1.43E-15 |
| 940   | FBN2      | 47.21653697 | -2.392720308 | 0.282771 | -8.461678 | 2.64E-17 | 5.50E-16 |
| 279   | PKMYT1    | 67.54491243 | -2.394383642 | 0.223877 | -10.69508 | 1.07E-26 | 7.54E-25 |
| 447   | BCL2A1    | 146.9234882 | -2.396661596 | 0.24403  | -9.821157 | 9.13E-23 | 4.00E-21 |
| 1090  | HSPB6     | 406.4919711 | -2.397036916 | 0.293277 | -8.173291 | 3.00E-16 | 5.40E-15 |
| 2506  | FCGBP     | 1440.962981 | -2.39802466  | 0.371362 | -6.457375 | 1.07E-10 | 8.33E-10 |
| 1398  | TNFRSF6B  | 463.4311548 | -2.398675208 | 0.31076  | -7.718735 | 1.17E-14 | 1.65E-13 |
| 5626  | CPA2      | 1.264321402 | -2.401330987 | 0.538692 | -4.457704 | 8.28E-06 | 2.89E-05 |
| 8225  | MIXL1     | 0.795366929 | -2.401338073 | 0.722799 | -3.322275 | 0.000893 | 0.002128 |
| 5566  | GOLGA8G   | 1.366119127 | -2.401806123 | 0.534901 | -4.490188 | 7.12E-06 | 2.51E-05 |
| 7532  | FAM133A   | 2.97463939  | -2.402948378 | 0.666939 | -3.602948 | 0.000315 | 0.000819 |
| 5515  | C14orf34  | 1.200417595 | -2.40327563  | 0.532466 | -4.513485 | 6.38E-06 | 2.27E-05 |
| 50    | ECM1      | 683.8592357 | -2.407070824 | 0.183359 | -13.12761 | 2.29E-39 | 8.97E-37 |
| 1138  | MT1F      | 510.8217288 | -2.411171318 | 0.297394 | -8.107678 | 5.16E-16 | 8.89E-15 |
| 1888  | SPOCK1    | 2101.334197 | -2.413052364 | 0.339993 | -7.097355 | 1.27E-12 | 1.32E-11 |
| 84    | FAM78B    | 60.76018528 | -2.413401047 | 0.192527 | -12.53536 | 4.78E-36 | 1.12E-33 |
| 886   | APOC1     | 3190.606328 | -2.418075106 | 0.282681 | -8.55408  | 1.19E-17 | 2.63E-16 |
| 141   | PYCARD    | 504.7872692 | -2.418261083 | 0.206574 | -11.70652 | 1.18E-31 | 1.64E-29 |
| 389   | COL3A1    | 19731.8278  | -2.419558831 | 0.239613 | -10.09778 | 5.65E-24 | 2.84E-22 |
| 3514  | C21orf125 | 3.971133912 | -2.419678308 | 0.427223 | -5.663741 | 1.48E-08 | 8.26E-08 |
| 7444  | CHP2      | 1.319187025 | -2.421438246 | 0.665468 | -3.638701 | 0.000274 | 0.000721 |
| 2379  | TFPI2     | 1596.198041 | -2.421535157 | 0.368094 | -6.578572 | 4.75E-11 | 3.91E-10 |
| 2207  | SCG2      | 218.8476474 | -2.421664221 | 0.358839 | -6.748617 | 1.49E-11 | 1.33E-10 |
| 3977  | DPYSL4    | 62.37976633 | -2.422101441 | 0.452298 | -5.355097 | 8.55E-08 | 4.21E-07 |
| 1448  | PLAC8     | 109.4901602 | -2.42233549  | 0.317181 | -7.637085 | 2.22E-14 | 3.01E-13 |
| 6214  | ELANE     | 3.807151708 | -2.423737856 | 0.581056 | -4.171265 | 3.03E-05 | 9.55E-05 |
| 1403  | HIST1H2BI | 3.011574824 | -2.426692025 | 0.314665 | -7.711985 | 1.24E-14 | 1.73E-13 |
| 629   | CPE       | 10424.55255 | -2.426725741 | 0.263381 | -9.213743 | 3.15E-20 | 9.81E-19 |
| 149   | KIF2C     | 138.0584068 | -2.427989912 | 0.208396 | -11.65084 | 2.27E-31 | 2.99E-29 |
| 10142 | PWRN1     | 1.431075703 | -2.428420954 | 0.93356  | -2.601248 | 0.009289 | 0.017952 |
| 1176  | POSTN     | 3584.050609 | -2.428767224 | 0.301548 | -8.054333 | 7.99E-16 | 1.33E-14 |
| 2690  | NCAM2     | 6.937268909 | -2.429462453 | 0.386159 | -6.291356 | 3.15E-10 | 2.29E-09 |
| 8558  | OXT       | 3.634500219 | -2.431602216 | 0.763058 | -3.186656 | 0.001439 | 0.003296 |
| 829   | FMOD      | 849.8216133 | -2.432549155 | 0.280279 | -8.679028 | 3.99E-18 | 9.44E-17 |
| 116   | OC1001307 | 267.1998609 | -2.432706267 | 0.200821 | -12.11383 | 8.92E-34 | 1.51E-31 |
| 3009  | C2orf82   | 4.496172601 | -2.435815212 | 0.404055 | -6.028419 | 1.66E-09 | 1.08E-08 |
| 14707 | DSCR8     | 0.567853178 | -2.436869831 | 2.222083 | -1.09666  | 0.27279  | 0.363565 |
| 1746  | EFNA5     | 1020.600597 | -2.437175275 | 0.336287 | -7.247303 | 4.25E-13 | 4.77E-12 |
| 1417  | GOLGA7B   | 151.7988973 | -2.437598458 | 0.31741  | -7.679647 | 1.60E-14 | 2.21E-13 |
| 208   | KDEL3     | 665.6004885 | -2.438188039 | 0.218373 | -11.16524 | 6.03E-29 | 5.69E-27 |
| 1833  | TNFSF14   | 32.48946976 | -2.441607133 | 0.340764 | -7.165103 | 7.77E-13 | 8.32E-12 |
| 950   | MEI1      | 73.66383082 | -2.44229367  | 0.289177 | -8.445672 | 3.02E-17 | 6.24E-16 |
| 3023  | PTTG3P    | 1.278387554 | -2.443006422 | 0.405983 | -6.017514 | 1.77E-09 | 1.15E-08 |
| 573   | CXCR5     | 13.18456024 | -2.444382102 | 0.260242 | -9.392713 | 5.85E-21 | 2.00E-19 |

|      |           |             |              |          |           |          |          |
|------|-----------|-------------|--------------|----------|-----------|----------|----------|
| 288  | SLAMF8    | 761.2219608 | -2.444456304 | 0.229833 | -10.63579 | 2.03E-26 | 1.38E-24 |
| 740  | PRG2      | 20.6783878  | -2.445146663 | 0.274307 | -8.913902 | 4.93E-19 | 1.30E-17 |
| 3617 | EREG      | 17.40818104 | -2.44535424  | 0.436974 | -5.596114 | 2.19E-08 | 1.19E-07 |
| 2630 | ACTN2     | 48.06693541 | -2.446492721 | 0.385138 | -6.352253 | 2.12E-10 | 1.58E-09 |
| 2041 | XIRP1     | 13.4639891  | -2.447173362 | 0.353628 | -6.920199 | 4.51E-12 | 4.33E-11 |
| 2893 | HPCAL4    | 16.83302293 | -2.450627222 | 0.400727 | -6.115459 | 9.63E-10 | 6.52E-09 |
| 203  | CRYBB1    | 12.17892173 | -2.450684645 | 0.218812 | -11.19998 | 4.08E-29 | 3.94E-27 |
| 493  | FNFRSF11A | 58.14583756 | -2.453322597 | 0.254217 | -9.650489 | 4.89E-22 | 1.95E-20 |
| 1348 | PRELP     | 1068.621332 | -2.453390726 | 0.314497 | -7.801007 | 6.14E-15 | 8.93E-14 |
| 3510 | CPZ       | 104.6029567 | -2.454056445 | 0.433195 | -5.665013 | 1.47E-08 | 8.21E-08 |
| 1212 | FNDC4     | 177.7504635 | -2.454398541 | 0.306779 | -8.000538 | 1.24E-15 | 2.00E-14 |
| 5387 | MT3       | 475.0607646 | -2.459691668 | 0.537655 | -4.574849 | 4.77E-06 | 1.73E-05 |
| 6431 | TGM5      | 2.862942845 | -2.462724137 | 0.606861 | -4.058134 | 4.95E-05 | 0.000151 |
| 4586 | ASAM      | 111.271437  | -2.463953965 | 0.493533 | -4.992477 | 5.96E-07 | 2.55E-06 |
| 2649 | CHI3L2    | 228.6296204 | -2.466726717 | 0.390021 | -6.324598 | 2.54E-10 | 1.88E-09 |
| 105  | RIN1      | 240.9750782 | -2.467833957 | 0.201837 | -12.22689 | 2.23E-34 | 4.17E-32 |
| 9763 | CNGA3     | 0.579967341 | -2.469394896 | 0.905669 | -2.726599 | 0.006399 | 0.012847 |
| 1770 | NALCN     | 43.4091076  | -2.469589357 | 0.342074 | -7.219457 | 5.22E-13 | 5.78E-12 |
| 3417 | INHBE     | 187.5734422 | -2.474467009 | 0.431326 | -5.736883 | 9.64E-09 | 5.53E-08 |
| 8440 | ANKFN1    | 0.880722991 | -2.474744436 | 0.765943 | -3.230976 | 0.001234 | 0.002865 |
| 2132 | SPRED3    | 2.639541116 | -2.47535123  | 0.362784 | -6.82321  | 8.90E-12 | 8.19E-11 |
| 65   | MEM132A   | 962.0634573 | -2.476180383 | 0.19292  | -12.83527 | 1.04E-37 | 3.14E-35 |
| 1614 | IL17B     | 6.215748881 | -2.47727729  | 0.33434  | -7.409448 | 1.27E-13 | 1.54E-12 |
| 1255 | TDO2      | 73.31933351 | -2.477800551 | 0.312786 | -7.921708 | 2.34E-15 | 3.66E-14 |
| 4931 | MYLPF     | 1.574569638 | -2.477934532 | 0.515101 | -4.810582 | 1.50E-06 | 5.98E-06 |
| 912  | CDH3      | 54.51873396 | -2.478928587 | 0.291719 | -8.497654 | 1.93E-17 | 4.16E-16 |
| 6156 | HMSD      | 1.100838708 | -2.479557897 | 0.59039  | -4.199867 | 2.67E-05 | 8.50E-05 |
| 5598 | CCL21     | 326.2049091 | -2.481068648 | 0.554703 | -4.47279  | 7.72E-06 | 2.70E-05 |
| 3050 | GOLGA8C   | 6.006049119 | -2.482015226 | 0.413714 | -5.999354 | 1.98E-09 | 1.27E-08 |
| 2923 | IGSF5     | 2.679172266 | -2.486752617 | 0.408056 | -6.094153 | 1.10E-09 | 7.38E-09 |
| 3431 | ANKRD33   | 4.631801916 | -2.486754854 | 0.434574 | -5.722276 | 1.05E-08 | 6.00E-08 |
| 7430 | RSPO1     | 1.113578333 | -2.488807669 | 0.682853 | -3.64472  | 0.000268 | 0.000706 |
| 4582 | CLEC4GP1  | 2.455019282 | -2.489036209 | 0.498213 | -4.99593  | 5.86E-07 | 2.50E-06 |
| 112  | C1QTNF1   | 1641.742297 | -2.489081803 | 0.204454 | -12.17432 | 4.26E-34 | 7.45E-32 |
| 3825 | WT1       | 138.4983519 | -2.489815493 | 0.456726 | -5.451439 | 5.00E-08 | 2.56E-07 |
| 5645 | LOC285696 | 0.762283673 | -2.492148342 | 0.559893 | -4.451113 | 8.54E-06 | 2.97E-05 |
| 3127 | C19orf21  | 147.2120989 | -2.494892626 | 0.419649 | -5.945189 | 2.76E-09 | 1.73E-08 |
| 1455 | CEACAM4   | 16.9656138  | -2.496303076 | 0.327186 | -7.629618 | 2.35E-14 | 3.17E-13 |
| 80   | SEMA7A    | 192.7175591 | -2.496819232 | 0.198622 | -12.57073 | 3.06E-36 | 7.49E-34 |
| 1890 | RNASE3    | 3.042986535 | -2.49869487  | 0.352239 | -7.09375  | 1.31E-12 | 1.35E-11 |
| 666  | OSM       | 108.4118166 | -2.499328212 | 0.274099 | -9.118349 | 7.63E-20 | 2.24E-18 |
| 2756 | FXYP1     | 268.7128187 | -2.502260707 | 0.401279 | -6.235719 | 4.50E-10 | 3.20E-09 |
| 200  | VSIG4     | 1037.808997 | -2.502401039 | 0.222729 | -11.23519 | 2.74E-29 | 2.68E-27 |
| 2819 | PI15      | 53.13228449 | -2.509750265 | 0.406664 | -6.171564 | 6.76E-10 | 4.70E-09 |
| 108  | COL6A2    | 12281.54848 | -2.510800432 | 0.205553 | -12.21485 | 2.59E-34 | 4.70E-32 |
| 100  | CDCA3     | 90.97769897 | -2.512574544 | 0.203874 | -12.32415 | 6.71E-35 | 1.32E-32 |
| 218  | FAM64A    | 51.94214517 | -2.515478578 | 0.22789  | -11.03814 | 2.50E-28 | 2.25E-26 |

|       |          |             |              |          |           |          |          |
|-------|----------|-------------|--------------|----------|-----------|----------|----------|
| 578   | PDE10A   | 654.8161452 | -2.516061968 | 0.268215 | -9.380751 | 6.55E-21 | 2.22E-19 |
| 1085  | PTX3     | 61.3866892  | -2.519186377 | 0.307862 | -8.182849 | 2.77E-16 | 5.01E-15 |
| 91    | FCGR1A   | 304.1417452 | -2.519697913 | 0.202867 | -12.42046 | 2.02E-35 | 4.36E-33 |
| 1273  | HTRA4    | 28.24512874 | -2.522135051 | 0.319371 | -7.897189 | 2.85E-15 | 4.39E-14 |
| 5425  | POM121L2 | 1.131884029 | -2.527845874 | 0.554962 | -4.554987 | 5.24E-06 | 1.89E-05 |
| 7847  | CRLF2    | 0.743582945 | -2.528867619 | 0.728203 | -3.472751 | 0.000515 | 0.001287 |
| 3010  | FAM57B   | 5.505370399 | -2.529637833 | 0.41965  | -6.027976 | 1.66E-09 | 1.08E-08 |
| 7183  | C1QL2    | 0.754807667 | -2.52989042  | 0.674478 | -3.750884 | 0.000176 | 0.000481 |
| 1581  | GLT25D2  | 76.24904246 | -2.532646544 | 0.34022  | -7.444144 | 9.76E-14 | 1.21E-12 |
| 6033  | DYSFIP1  | 1.038731711 | -2.534693127 | 0.596185 | -4.25152  | 2.12E-05 | 6.90E-05 |
| 1317  | RDM1     | 7.192274115 | -2.534754208 | 0.323354 | -7.83894  | 4.54E-15 | 6.76E-14 |
| 74    | C1QA     | 6201.014057 | -2.536992277 | 0.201095 | -12.61588 | 1.73E-36 | 4.57E-34 |
| 11768 | SPRR1B   | 0.64621662  | -2.537980492 | 1.250218 | -2.03003  | 0.042354 | 0.070545 |
| 379   | CFH      | 2999.11845  | -2.538574198 | 0.250617 | -10.12931 | 4.10E-24 | 2.12E-22 |
| 4572  | CHST4    | 4.226672464 | -2.539479895 | 0.50806  | -4.998388 | 5.78E-07 | 2.48E-06 |
| 667   | LOXL1    | 405.2162873 | -2.542211765 | 0.278808 | -9.118136 | 7.64E-20 | 2.25E-18 |
| 576   | MMP23B   | 36.62133416 | -2.543565229 | 0.270944 | -9.387781 | 6.13E-21 | 2.09E-19 |
| 298   | KCNN4    | 60.84073561 | -2.545103018 | 0.241257 | -10.54935 | 5.12E-26 | 3.36E-24 |
| 1315  | LRG1     | 349.6196641 | -2.54900291  | 0.325133 | -7.839881 | 4.51E-15 | 6.72E-14 |
| 4158  | EN2      | 16.73618225 | -2.549929833 | 0.486094 | -5.245758 | 1.56E-07 | 7.34E-07 |
| 9472  | HBQ1     | 0.799304093 | -2.550629403 | 0.901101 | -2.83057  | 0.004647 | 0.009615 |
| 7903  | KERA     | 1.805663461 | -2.552185774 | 0.740335 | -3.447338 | 0.000566 | 0.001404 |
| 2083  | HRASLS   | 21.95319047 | -2.55355847  | 0.371845 | -6.867268 | 6.54E-12 | 6.16E-11 |
| 473   | CD163    | 2729.64578  | -2.554818498 | 0.262751 | -9.72333  | 2.40E-22 | 9.94E-21 |
| 6891  | CACNA1B  | 3.310766415 | -2.556422198 | 0.660977 | -3.86764  | 0.00011  | 0.000313 |
| 2176  | IL8      | 413.995204  | -2.560350413 | 0.37743  | -6.783652 | 1.17E-11 | 1.06E-10 |
| 10953 | S100A7   | 0.584554873 | -2.56328453  | 1.113277 | -2.302468 | 0.021309 | 0.038133 |
| 6673  | HMHB1    | 1.392305291 | -2.564541199 | 0.648812 | -3.952672 | 7.73E-05 | 0.000227 |
| 834   | PRRX2    | 29.87578297 | -2.566012518 | 0.296038 | -8.667836 | 4.40E-18 | 1.04E-16 |
| 1427  | HAS2     | 32.2912655  | -2.566484463 | 0.3346   | -7.670315 | 1.72E-14 | 2.36E-13 |
| 5957  | LPO      | 1.842684027 | -2.568274276 | 0.599087 | -4.286982 | 1.81E-05 | 5.96E-05 |
| 6765  | HOXB13   | 31.08475502 | -2.570173368 | 0.656967 | -3.912178 | 9.15E-05 | 0.000265 |
| 7153  | AKR1D1   | 2.808572398 | -2.571380759 | 0.683355 | -3.762876 | 0.000168 | 0.00046  |
| 8236  | LCN1     | 0.773301804 | -2.573696314 | 0.775847 | -3.317273 | 0.000909 | 0.002163 |
| 8579  | AHSP     | 3.266405597 | -2.573712215 | 0.809313 | -3.180121 | 0.001472 | 0.003363 |
| 6889  | CSF2     | 0.887988854 | -2.575449986 | 0.66581  | -3.868144 | 0.00011  | 0.000312 |
| 848   | NAV3     | 67.17974873 | -2.576637247 | 0.29825  | -8.639196 | 5.66E-18 | 1.31E-16 |
| 164   | KIF18B   | 77.34471592 | -2.5781843   | 0.222681 | -11.57791 | 5.33E-31 | 6.37E-29 |
| 789   | AEBP1    | 13063.32381 | -2.581255945 | 0.294147 | -8.775396 | 1.70E-18 | 4.23E-17 |
| 146   | HJURP    | 112.1266108 | -2.581652156 | 0.221526 | -11.65393 | 2.19E-31 | 2.92E-29 |
| 151   | EME1     | 45.53243166 | -2.582804118 | 0.222303 | -11.61839 | 3.32E-31 | 4.31E-29 |
| 59    | PTTG1    | 218.4473227 | -2.583077526 | 0.199791 | -12.9289  | 3.09E-38 | 1.03E-35 |
| 902   | COL16A1  | 469.2393115 | -2.583517669 | 0.303424 | -8.514537 | 1.67E-17 | 3.63E-16 |
| 2547  | IGDCC4   | 244.4379049 | -2.585857298 | 0.402307 | -6.427578 | 1.30E-10 | 9.98E-10 |
| 2186  | GPR172B  | 20.0203276  | -2.587288785 | 0.381987 | -6.773234 | 1.26E-11 | 1.13E-10 |
| 10922 | HTR2C    | 0.815318719 | -2.58754487  | 1.119412 | -2.311522 | 0.020804 | 0.037336 |
| 518   | MDK      | 1578.301954 | -2.589131023 | 0.271349 | -9.541704 | 1.41E-21 | 5.32E-20 |

|       |                   |             |              |          |           |          |          |
|-------|-------------------|-------------|--------------|----------|-----------|----------|----------|
| 5572  | AGRP              | 1.199677084 | -2.589566678 | 0.57702  | -4.487827 | 7.20E-06 | 2.53E-05 |
| 3252  | DPF1              | 1.994900725 | -2.590667618 | 0.442715 | -5.851769 | 4.86E-09 | 2.93E-08 |
| 966   | SF12-TNF $\alpha$ | 331.0820687 | -2.592054371 | 0.308061 | -8.41409  | 3.96E-17 | 8.03E-16 |
| 609   | S100B             | 39.37429758 | -2.595080297 | 0.279212 | -9.294291 | 1.48E-20 | 4.78E-19 |
| 11185 | CIDEA             | 1.084401888 | -2.596066749 | 1.166379 | -2.225749 | 0.026031 | 0.045616 |
| 799   | TNNI2             | 11.18797511 | -2.596374694 | 0.296489 | -8.757068 | 2.00E-18 | 4.92E-17 |
| 10264 | OR4C6             | 0.67003985  | -2.597892939 | 1.014656 | -2.560369 | 0.010456 | 0.019968 |
| 1930  | IGF2BP3           | 253.7015111 | -2.598578519 | 0.368289 | -7.055805 | 1.72E-12 | 1.74E-11 |
| 8605  | SERPINB4          | 0.988824155 | -2.600147437 | 0.819279 | -3.173704 | 0.001505 | 0.003428 |
| 7249  | ZIC1              | 2.08167368  | -2.600848823 | 0.69812  | -3.725506 | 0.000195 | 0.000527 |
| 648   | PPM1N             | 20.66182129 | -2.60202619  | 0.283702 | -9.171698 | 4.66E-20 | 1.41E-18 |
| 247   | MRC2              | 1738.552552 | -2.60411674  | 0.23965  | -10.86634 | 1.67E-27 | 1.32E-25 |
| 1867  | CLVS1             | 18.43554896 | -2.608627259 | 0.366314 | -7.121281 | 1.07E-12 | 1.12E-11 |
| 1394  | TRPV3             | 4.763610501 | -2.610160909 | 0.337946 | -7.723601 | 1.13E-14 | 1.59E-13 |
| 378   | ADAM8             | 336.4151387 | -2.610524332 | 0.25766  | -10.13165 | 4.00E-24 | 2.07E-22 |
| 5072  | CCNA1             | 20.27152962 | -2.610898805 | 0.551286 | -4.736013 | 2.18E-06 | 8.42E-06 |
| 237   | GPR84             | 35.08603079 | -2.612619394 | 0.238898 | -10.93613 | 7.74E-28 | 6.38E-26 |
| 7841  | CACNG5            | 1.480680506 | -2.61465113  | 0.751715 | -3.478249 | 0.000505 | 0.001262 |
| 120   | CDC20             | 190.1853484 | -2.615218844 | 0.216903 | -12.0571  | 1.78E-33 | 2.91E-31 |
| 971   | PLTP              | 5355.234872 | -2.616712569 | 0.311706 | -8.394799 | 4.67E-17 | 9.42E-16 |
| 2854  | KLF1              | 1.937523818 | -2.620957342 | 0.426815 | -6.140732 | 8.21E-10 | 5.64E-09 |
| 4965  | SLC13A5           | 1.297165958 | -2.621935982 | 0.547362 | -4.79013  | 1.67E-06 | 6.58E-06 |
| 1572  | ARTN              | 32.27502009 | -2.623294524 | 0.351387 | -7.465534 | 8.30E-14 | 1.03E-12 |
| 1198  | ELOVL3            | 5.897658792 | -2.626776171 | 0.32771  | -8.01555  | 1.10E-15 | 1.79E-14 |
| 974   | CAPN11            | 38.61783008 | -2.631401287 | 0.313756 | -8.386777 | 5.00E-17 | 1.01E-15 |
| 859   | UNC13A            | 29.51983221 | -2.631573427 | 0.30522  | -8.621895 | 6.59E-18 | 1.50E-16 |
| 11772 | SPRR1A            | 0.583914364 | -2.633182012 | 1.297476 | -2.029465 | 0.042411 | 0.07061  |
| 688   | HSD11B1           | 48.836246   | -2.635037765 | 0.291365 | -9.043759 | 1.51E-19 | 4.31E-18 |
| 17    | PLAUR             | 668.9492725 | -2.639261441 | 0.183237 | -14.40357 | 4.91E-47 | 5.67E-44 |
| 7721  | CA1               | 13.07383167 | -2.641144705 | 0.747804 | -3.531866 | 0.000413 | 0.001047 |
| 4485  | MKRN3             | 3.813990682 | -2.641371123 | 0.523245 | -5.048056 | 4.46E-07 | 1.95E-06 |
| 5052  | VGF               | 12.58520722 | -2.64575356  | 0.557523 | -4.745548 | 2.08E-06 | 8.07E-06 |
| 128   | CFD               | 321.4431732 | -2.64597357  | 0.221962 | -11.92084 | 9.22E-33 | 1.41E-30 |
| 525   | TNFRSF18          | 33.81095557 | -2.648575549 | 0.277905 | -9.530501 | 1.57E-21 | 5.84E-20 |
| 3997  | PI16              | 21.02412615 | -2.650284792 | 0.496126 | -5.341958 | 9.19E-08 | 4.51E-07 |
| 3313  | HAR1B             | 3.088398921 | -2.652136637 | 0.456587 | -5.808615 | 6.30E-09 | 3.73E-08 |
| 1460  | GPR64             | 130.6476457 | -2.657465837 | 0.348519 | -7.625022 | 2.44E-14 | 3.28E-13 |
| 3462  | PF4               | 3.389297643 | -2.658499319 | 0.466474 | -5.699138 | 1.20E-08 | 6.82E-08 |
| 4487  | C21orf88          | 1.796332107 | -2.659399214 | 0.526907 | -5.047185 | 4.48E-07 | 1.96E-06 |
| 353   | C9orf109          | 14.54447787 | -2.660458491 | 0.259313 | -10.25966 | 1.07E-24 | 5.95E-23 |
| 183   | TROAP             | 80.95761687 | -2.666587513 | 0.234342 | -11.37902 | 5.32E-30 | 5.70E-28 |
| 2100  | CCDC42            | 1.284545807 | -2.669284877 | 0.389728 | -6.849104 | 7.43E-12 | 6.94E-11 |
| 134   | PLK1              | 163.5850071 | -2.671374337 | 0.226174 | -11.81117 | 3.42E-32 | 5.00E-30 |
| 4986  | OTP               | 1.058549321 | -2.674915522 | 0.559531 | -4.780641 | 1.75E-06 | 6.87E-06 |
| 2886  | PLAC1             | 1.474020445 | -2.678015095 | 0.437403 | -6.12253  | 9.21E-10 | 6.26E-09 |
| 3413  | PRAME             | 436.7464505 | -2.678053003 | 0.466668 | -5.738669 | 9.54E-09 | 5.48E-08 |
| 9196  | EFNA2             | 1.089933468 | -2.678365535 | 0.910496 | -2.941655 | 0.003265 | 0.006958 |



|       |           |             |              |          |           |          |          |
|-------|-----------|-------------|--------------|----------|-----------|----------|----------|
| 12274 | PAX3      | 0.705471742 | -2.678832974 | 1.429527 | -1.873929 | 0.06094  | 0.097319 |
| 2043  | KRT36     | 1.946440654 | -2.680846465 | 0.387464 | -6.918948 | 4.55E-12 | 4.37E-11 |
| 369   | INSL3     | 7.86686688  | -2.682159388 | 0.2634   | -10.18285 | 2.37E-24 | 1.26E-22 |
| 383   | NTNG2     | 54.61405098 | -2.682466994 | 0.265223 | -10.11401 | 4.79E-24 | 2.45E-22 |
| 4703  | TF        | 367.6775606 | -2.684674917 | 0.544657 | -4.929109 | 8.26E-07 | 3.44E-06 |
| 6040  | CRNN      | 0.783762069 | -2.685058453 | 0.631981 | -4.248638 | 2.15E-05 | 6.98E-05 |
| 4712  | MTTP      | 155.7566429 | -2.686323264 | 0.545208 | -4.927154 | 8.34E-07 | 3.47E-06 |
| 671   | AIM2      | 56.13388406 | -2.691232564 | 0.295826 | -9.097338 | 9.26E-20 | 2.70E-18 |
| 513   | TUBB3     | 613.7186466 | -2.691743759 | 0.2819   | -9.548592 | 1.31E-21 | 5.02E-20 |
| 5530  | REG1A     | 1503.918909 | -2.693297383 | 0.597781 | -4.505493 | 6.62E-06 | 2.35E-05 |
| 220   | KIF20A    | 226.9741305 | -2.695226406 | 0.244599 | -11.01896 | 3.10E-28 | 2.75E-26 |
| 863   | ULBP1     | 23.26247178 | -2.698118359 | 0.313232 | -8.613815 | 7.07E-18 | 1.61E-16 |
| 1471  | FNDC1     | 271.7320563 | -2.698421951 | 0.354742 | -7.606706 | 2.81E-14 | 3.75E-13 |
| 5512  | LOC648691 | 1.384863078 | -2.703089281 | 0.598811 | -4.514097 | 6.36E-06 | 2.26E-05 |
| 2674  | XKR3      | 1.685705343 | -2.703220975 | 0.428794 | -6.304234 | 2.90E-10 | 2.12E-09 |
| 634   | FBLN1     | 1357.782386 | -2.703343463 | 0.293754 | -9.202757 | 3.49E-20 | 1.08E-18 |
| 4089  | PRKCG     | 1.152597473 | -2.704643485 | 0.511601 | -5.286623 | 1.25E-07 | 5.97E-07 |
| 332   | FAP       | 240.8051286 | -2.704933675 | 0.260332 | -10.39032 | 2.74E-25 | 1.62E-23 |
| 553   | MXRA8     | 2135.139034 | -2.710714093 | 0.286741 | -9.453514 | 3.28E-21 | 1.16E-19 |
| 1541  | WNT4      | 29.74519894 | -2.711731901 | 0.361289 | -7.50572  | 6.11E-14 | 7.77E-13 |
| 38    | ZP3       | 237.4612736 | -2.714900244 | 0.202152 | -13.42997 | 4.04E-41 | 2.08E-38 |
| 1162  | MT1X      | 2282.038221 | -2.715514911 | 0.336435 | -8.071437 | 6.95E-16 | 1.17E-14 |
| 5002  | KCNJ6     | 1.274042152 | -2.716077792 | 0.569045 | -4.773043 | 1.81E-06 | 7.11E-06 |
| 1299  | GXYLT2    | 126.9934851 | -2.716974253 | 0.34534  | -7.867534 | 3.62E-15 | 5.46E-14 |
| 490   | MXRA5     | 1921.735815 | -2.718702825 | 0.281553 | -9.656113 | 4.63E-22 | 1.85E-20 |
| 1227  | EPS8L1    | 165.2192414 | -2.721573029 | 0.340983 | -7.98154  | 1.45E-15 | 2.31E-14 |
| 3120  | MAGEL2    | 6.424930742 | -2.726587406 | 0.458366 | -5.94849  | 2.71E-09 | 1.70E-08 |
| 3816  | ANKRD2    | 16.42624723 | -2.728660059 | 0.499427 | -5.463576 | 4.67E-08 | 2.40E-07 |
| 9735  | KIAA0408  | 5.233676092 | -2.731290251 | 0.997742 | -2.737471 | 0.006191 | 0.012465 |
| 8763  | KLK8      | 0.810070625 | -2.734243662 | 0.881767 | -3.100868 | 0.00193  | 0.004316 |
| 2303  | G6GALNAC  | 8.76729901  | -2.736330154 | 0.411423 | -6.650893 | 2.91E-11 | 2.48E-10 |
| 147   | RARRES2   | 6980.354584 | -2.73763833  | 0.234908 | -11.65407 | 2.19E-31 | 2.92E-29 |
| 6703  | ZIC4      | 1.526468633 | -2.738890784 | 0.695125 | -3.940139 | 8.14E-05 | 0.000238 |
| 786   | MIAT      | 360.9092655 | -2.739288427 | 0.31167  | -8.789059 | 1.51E-18 | 3.76E-17 |
| 2840  | DPT       | 66.687987   | -2.740019944 | 0.445419 | -6.151555 | 7.67E-10 | 5.30E-09 |
| 12773 | LHX3      | 0.662953148 | -2.741719804 | 1.600954 | -1.712554 | 0.086795 | 0.133192 |
| 390   | SLC17A9   | 256.1132332 | -2.74329802  | 0.271676 | -10.09769 | 5.66E-24 | 2.84E-22 |
| 5195  | CPA5      | 1.595751195 | -2.747223702 | 0.587117 | -4.679178 | 2.88E-06 | 1.09E-05 |
| 3504  | ISL2      | 2.2379686   | -2.747716341 | 0.484488 | -5.671377 | 1.42E-08 | 7.92E-08 |
| 440   | CATSPER1  | 6.665287465 | -2.749025088 | 0.279035 | -9.851886 | 6.73E-23 | 3.00E-21 |
| 271   | APOL1     | 10804.6783  | -2.750260083 | 0.25631  | -10.73023 | 7.34E-27 | 5.31E-25 |
| 11249 | IRX4      | 0.664082857 | -2.750679374 | 1.25008  | -2.200403 | 0.027778 | 0.048403 |
| 5887  | EPYC      | 2.268540517 | -2.753323814 | 0.63589  | -4.329873 | 1.49E-05 | 4.97E-05 |
| 2205  | INHA      | 38.6678621  | -2.755524315 | 0.408201 | -6.750403 | 1.47E-11 | 1.31E-10 |
| 350   | PYCR1     | 401.6881015 | -2.756441895 | 0.268224 | -10.27663 | 8.98E-25 | 5.03E-23 |
| 1265  | PKD2L1    | 12.00412815 | -2.756765995 | 0.348621 | -7.907634 | 2.62E-15 | 4.06E-14 |
| 2319  | RYR2      | 108.3383181 | -2.759774815 | 0.4156   | -6.640451 | 3.13E-11 | 2.64E-10 |

|       |            |             |              |          |           |          |          |
|-------|------------|-------------|--------------|----------|-----------|----------|----------|
| 5284  | HTR3A      | 13.04466196 | -2.761366103 | 0.596123 | -4.632208 | 3.62E-06 | 1.34E-05 |
| 2801  | PAX5       | 4.020018445 | -2.764331341 | 0.446484 | -6.191339 | 5.97E-10 | 4.17E-09 |
| 1717  | CYP19A1    | 10.48793516 | -2.766587234 | 0.379977 | -7.280942 | 3.31E-13 | 3.78E-12 |
| 5717  | PRTN3      | 5.289301982 | -2.76805035  | 0.627534 | -4.411    | 1.03E-05 | 3.53E-05 |
| 1869  | SHOX2      | 20.1886562  | -2.771709039 | 0.389211 | -7.121351 | 1.07E-12 | 1.12E-11 |
| 1088  | C2CD4B     | 35.41895837 | -2.772015148 | 0.338988 | -8.177331 | 2.90E-16 | 5.23E-15 |
| 1020  | GPR35      | 263.8712333 | -2.773050503 | 0.334046 | -8.301413 | 1.03E-16 | 1.98E-15 |
| 9992  | CPLX2      | 2.109391103 | -2.77448759  | 1.045227 | -2.654435 | 0.007944 | 0.015584 |
| 746   | NKAIN1     | 63.98895297 | -2.778080953 | 0.312092 | -8.901475 | 5.51E-19 | 1.45E-17 |
| 1883  | DCN        | 2463.641949 | -2.78160354  | 0.391559 | -7.103928 | 1.21E-12 | 1.26E-11 |
| 1639  | BLK        | 11.90047498 | -2.785908507 | 0.377771 | -7.374603 | 1.65E-13 | 1.97E-12 |
| 171   | RNASE2     | 44.68307488 | -2.790676976 | 0.242401 | -11.51264 | 1.14E-30 | 1.31E-28 |
| 962   | JAKMIP2    | 22.54111555 | -2.791268421 | 0.331254 | -8.426362 | 3.57E-17 | 7.27E-16 |
| 1935  | TMEM130    | 583.1675131 | -2.792654749 | 0.396129 | -7.049868 | 1.79E-12 | 1.81E-11 |
| 1730  | C19orf33   | 1174.686808 | -2.796128227 | 0.384738 | -7.267619 | 3.66E-13 | 4.14E-12 |
| 274   | EMILIN1    | 1032.432653 | -2.797083711 | 0.26109  | -10.71309 | 8.84E-27 | 6.32E-25 |
| 12416 | CDH18      | 0.804594798 | -2.801705015 | 1.530296 | -1.830825 | 0.067127 | 0.105972 |
| 12361 | LOC116437  | 0.725489363 | -2.802153498 | 1.516813 | -1.847396 | 0.06469  | 0.102579 |
| 3897  | SP7        | 1.02243475  | -2.803715952 | 0.51868  | -5.405485 | 6.46E-08 | 3.25E-07 |
| 2411  | PRSSL1     | 2.398365927 | -2.804214468 | 0.428123 | -6.550026 | 5.75E-11 | 4.68E-10 |
| 6962  | TLX1       | 1.583137311 | -2.804498415 | 0.730019 | -3.841676 | 0.000122 | 0.000344 |
| 5680  | GRP        | 2.236093961 | -2.805373922 | 0.632991 | -4.431934 | 9.34E-06 | 3.22E-05 |
| 4010  | TPSG1      | 67.77374271 | -2.809539699 | 0.526659 | -5.33465  | 9.57E-08 | 4.68E-07 |
| 2479  | GNG4       | 67.01072157 | -2.811788478 | 0.433282 | -6.489517 | 8.61E-11 | 6.81E-10 |
| 8803  | KRT75      | 1.249625317 | -2.814035318 | 0.912064 | -3.08535  | 0.002033 | 0.004527 |
| 2162  | MMP7       | 3650.828501 | -2.814379982 | 0.413976 | -6.79841  | 1.06E-11 | 9.59E-11 |
| 2490  | TMEM59L    | 18.18184688 | -2.815232636 | 0.434627 | -6.47736  | 9.33E-11 | 7.35E-10 |
| 892   | CCIN       | 4.65267158  | -2.821212927 | 0.3303   | -8.541355 | 1.33E-17 | 2.92E-16 |
| 9697  | ADIPOQ     | 3.399150331 | -2.821874977 | 1.027309 | -2.74686  | 0.006017 | 0.01216  |
| 2929  | ZCCHC5     | 1.40863083  | -2.822453041 | 0.46347  | -6.089832 | 1.13E-09 | 7.56E-09 |
| 177   | LOXL2      | 4294.125815 | -2.82330016  | 0.247242 | -11.41917 | 3.35E-30 | 3.71E-28 |
| 623   | CAMK2N2    | 36.28352735 | -2.828848215 | 0.3062   | -9.238577 | 2.50E-20 | 7.86E-19 |
| 2448  | LOC1001889 | 11.68573612 | -2.829724747 | 0.434471 | -6.513027 | 7.37E-11 | 5.89E-10 |
| 6360  | CST1       | 4.28841587  | -2.829897919 | 0.690826 | -4.096396 | 4.20E-05 | 0.000129 |
| 810   | CASP5      | 9.01988946  | -2.836747817 | 0.324752 | -8.735111 | 2.43E-18 | 5.89E-17 |
| 1741  | NPTX2      | 4943.689805 | -2.839453758 | 0.391529 | -7.252213 | 4.10E-13 | 4.62E-12 |
| 322   | SSC5D      | 482.5550434 | -2.842219791 | 0.272224 | -10.44072 | 1.62E-25 | 9.84E-24 |
| 1234  | HGF        | 451.3493114 | -2.842859823 | 0.357121 | -7.960501 | 1.71E-15 | 2.72E-14 |
| 2326  | LAIR2      | 8.845752209 | -2.844160855 | 0.428824 | -6.632464 | 3.30E-11 | 2.78E-10 |
| 1820  | GUCY2D     | 3.65257112  | -2.844321973 | 0.396574 | -7.172244 | 7.38E-13 | 7.95E-12 |
| 1245  | MT1DP      | 10.61440187 | -2.846191941 | 0.358679 | -7.935204 | 2.10E-15 | 3.31E-14 |
| 7074  | KRT79      | 0.671444649 | -2.847125967 | 0.750493 | -3.793673 | 0.000148 | 0.000411 |
| 18    | TIMP1      | 13339.05319 | -2.848905947 | 0.200239 | -14.22751 | 6.18E-46 | 6.73E-43 |
| 606   | LYPD1      | 152.2601442 | -2.849104581 | 0.306395 | -9.298799 | 1.42E-20 | 4.59E-19 |
| 1657  | FABP6      | 556.4725694 | -2.84921091  | 0.387757 | -7.347921 | 2.01E-13 | 2.38E-12 |
| 8843  | LOC150622  | 0.874740361 | -2.855972127 | 0.929058 | -3.074053 | 0.002112 | 0.004681 |
| 4311  | CXorf59    | 3.573926595 | -2.858769838 | 0.555054 | -5.150436 | 2.60E-07 | 1.18E-06 |

|       |           |             |              |          |           |          |          |
|-------|-----------|-------------|--------------|----------|-----------|----------|----------|
| 7790  | RSPO2     | 1.449969828 | -2.86294469  | 0.816868 | -3.504782 | 0.000457 | 0.00115  |
| 6107  | SLC30A10  | 2.00760627  | -2.863948708 | 0.678806 | -4.219099 | 2.45E-05 | 7.87E-05 |
| 2826  | SYT5      | 4.390609144 | -2.865140468 | 0.464685 | -6.165775 | 7.01E-10 | 4.86E-09 |
| 4549  | TCAM1P    | 3.713716175 | -2.865487661 | 0.571946 | -5.010071 | 5.44E-07 | 2.34E-06 |
| 5385  | C13orf36  | 3.242149889 | -2.865997063 | 0.6263   | -4.57608  | 4.74E-06 | 1.72E-05 |
| 5222  | TNR       | 2.172304265 | -2.868295112 | 0.614328 | -4.668993 | 3.03E-06 | 1.14E-05 |
| 935   | GAP43     | 7.904884891 | -2.871145347 | 0.338965 | -8.470324 | 2.45E-17 | 5.13E-16 |
| 1531  | CES1      | 162.7951017 | -2.874951534 | 0.382536 | -7.515512 | 5.67E-14 | 7.26E-13 |
| 791   | C16orf74  | 279.513276  | -2.876278648 | 0.327942 | -8.770703 | 1.78E-18 | 4.40E-17 |
| 1633  | LEFTY1    | 37.4012344  | -2.878841776 | 0.389915 | -7.38325  | 1.54E-13 | 1.85E-12 |
| 3858  | TGM4      | 1.738384532 | -2.881807283 | 0.530985 | -5.427282 | 5.72E-08 | 2.91E-07 |
| 761   | BEST4     | 40.55747806 | -2.882710289 | 0.325368 | -8.859858 | 8.01E-19 | 2.06E-17 |
| 811   | LOC286467 | 10.91385827 | -2.885389991 | 0.330391 | -8.733246 | 2.47E-18 | 5.98E-17 |
| 4302  | CFHR1     | 8.797593966 | -2.886434164 | 0.559825 | -5.155954 | 2.52E-07 | 1.15E-06 |
| 7437  | CRABP1    | 6.274899723 | -2.889327842 | 0.793486 | -3.641308 | 0.000271 | 0.000715 |
| 2003  | MAGED4B   | 192.1016267 | -2.890134227 | 0.415533 | -6.955241 | 3.52E-12 | 3.44E-11 |
| 1523  | PLA2G1B   | 6.014667599 | -2.896913859 | 0.384809 | -7.528177 | 5.15E-14 | 6.62E-13 |
| 3479  | WIT1      | 10.63048688 | -2.901222007 | 0.510105 | -5.687502 | 1.29E-08 | 7.26E-08 |
| 5316  | EPS8L3    | 156.263552  | -2.902810147 | 0.629235 | -4.613235 | 3.96E-06 | 1.46E-05 |
| 3677  | MXN1      | 14.28637237 | -2.909631703 | 0.523989 | -5.552845 | 2.81E-08 | 1.50E-07 |
| 215   | CDC25C    | 36.92180433 | -2.912045145 | 0.263324 | -11.05879 | 1.99E-28 | 1.81E-26 |
| 2731  | NDP       | 4.834969514 | -2.912466411 | 0.465618 | -6.255059 | 3.97E-10 | 2.85E-09 |
| 744   | ZFHX4     | 153.7735925 | -2.918735795 | 0.327726 | -8.906037 | 5.29E-19 | 1.39E-17 |
| 136   | CARD11    | 489.0553722 | -2.920761885 | 0.247827 | -11.78548 | 4.64E-32 | 6.68E-30 |
| 897   | KIAA1199  | 83.23117797 | -2.923754282 | 0.342811 | -8.528752 | 1.48E-17 | 3.23E-16 |
| 713   | UNC5A     | 75.66982533 | -2.925124052 | 0.325787 | -8.978642 | 2.74E-19 | 7.54E-18 |
| 764   | MT1E      | 1732.966172 | -2.928393689 | 0.330921 | -8.849219 | 8.81E-19 | 2.26E-17 |
| 96    | PCOLCE    | 1140.982648 | -2.934707243 | 0.236868 | -12.38964 | 2.97E-35 | 6.07E-33 |
| 115   | BIRC5     | 140.3926484 | -2.938579879 | 0.242309 | -12.1274  | 7.56E-34 | 1.29E-31 |
| 89    | COL1A2    | 25117.00828 | -2.939277564 | 0.236055 | -12.45167 | 1.37E-35 | 3.02E-33 |
| 1512  | AQP9      | 631.1722858 | -2.940259981 | 0.389356 | -7.551595 | 4.30E-14 | 5.57E-13 |
| 444   | PODN      | 325.7147936 | -2.943948006 | 0.299335 | -9.834969 | 7.96E-23 | 3.51E-21 |
| 221   | MT2A      | 7170.572267 | -2.947235106 | 0.267468 | -11.01903 | 3.09E-28 | 2.75E-26 |
| 14976 | CLDN22    | 0.721470183 | -2.947429454 | 2.904596 | -1.014747 | 0.310227 | 0.406033 |
| 170   | TMEM119   | 351.3456789 | -2.949861526 | 0.256096 | -11.51857 | 1.06E-30 | 1.23E-28 |
| 9167  | REG3G     | 24.37418477 | -2.958617645 | 1.002367 | -2.95163  | 0.003161 | 0.006759 |
| 1488  | SLC30A3   | 6.372880768 | -2.961163245 | 0.390019 | -7.592348 | 3.14E-14 | 4.14E-13 |
| 2595  | DES       | 292.4988656 | -2.961961998 | 0.463698 | -6.387697 | 1.68E-10 | 1.27E-09 |
| 77    | AURKB     | 74.97271666 | -2.962716546 | 0.235676 | -12.57112 | 3.04E-36 | 7.49E-34 |
| 317   | STEAP3    | 1942.216949 | -2.967902601 | 0.284017 | -10.44975 | 1.47E-25 | 9.08E-24 |
| 757   | DMBT1     | 13.78958081 | -2.973589532 | 0.335292 | -8.868655 | 7.40E-19 | 1.92E-17 |
| 142   | C1S       | 11496.20469 | -2.97421488  | 0.254442 | -11.68915 | 1.45E-31 | 2.00E-29 |
| 7000  | HSPB3     | 2.075962703 | -2.974470406 | 0.777862 | -3.823905 | 0.000131 | 0.000368 |
| 614   | ACHE      | 199.077218  | -2.976389009 | 0.320861 | -9.276256 | 1.76E-20 | 5.60E-19 |
| 595   | FCRLA     | 18.16280669 | -2.98203162  | 0.319559 | -9.331713 | 1.04E-20 | 3.43E-19 |
| 7235  | KRT6C     | 1.211194568 | -2.984191012 | 0.79978  | -3.731266 | 0.000191 | 0.000516 |
| 431   | DERL3     | 338.852194  | -2.991206163 | 0.302143 | -9.899962 | 4.16E-23 | 1.89E-21 |

|       |          |             |              |          |           |          |          |
|-------|----------|-------------|--------------|----------|-----------|----------|----------|
| 2289  | FCRL2    | 6.380164672 | -2.992183027 | 0.449001 | -6.664094 | 2.66E-11 | 2.28E-10 |
| 570   | THBS2    | 4621.936099 | -2.99468245  | 0.318391 | -9.405674 | 5.17E-21 | 1.78E-19 |
| 8625  | HBM      | 1.864089752 | -2.997728229 | 0.947589 | -3.163531 | 0.001559 | 0.003542 |
| 2847  | HAS1     | 3.863387287 | -2.998896036 | 0.487911 | -6.146397 | 7.93E-10 | 5.46E-09 |
| 1831  | OR13A1   | 2.988360885 | -3.002941862 | 0.419114 | -7.16497  | 7.78E-13 | 8.32E-12 |
| 3362  | HHIPL2   | 2.785805455 | -3.003183879 | 0.52039  | -5.771022 | 7.88E-09 | 4.59E-08 |
| 2536  | TRIM29   | 97.2241812  | -3.003622295 | 0.466862 | -6.433636 | 1.25E-10 | 9.63E-10 |
| 5916  | DPYSL5   | 5.107421593 | -3.009976757 | 0.697509 | -4.315322 | 1.59E-05 | 5.28E-05 |
| 6466  | MAGEC3   | 3.17770532  | -3.021443458 | 0.747323 | -4.043023 | 5.28E-05 | 0.00016  |
| 4546  | RETN     | 4.532957183 | -3.024432882 | 0.603491 | -5.01156  | 5.40E-07 | 2.33E-06 |
| 6166  | GCKR     | 9.740669152 | -3.02697445  | 0.722028 | -4.192325 | 2.76E-05 | 8.78E-05 |
| 481   | MFAP2    | 89.25282572 | -3.029724459 | 0.312617 | -9.691504 | 3.28E-22 | 1.34E-20 |
| 4535  | CPN2     | 116.0571602 | -3.035669736 | 0.605115 | -5.01668  | 5.26E-07 | 2.27E-06 |
| 4743  | ERN2     | 2.539351951 | -3.035789106 | 0.617932 | -4.912818 | 8.98E-07 | 3.71E-06 |
| 4737  | GRIN2B   | 2.782147491 | -3.037867844 | 0.61794  | -4.916119 | 8.83E-07 | 3.65E-06 |
| 979   | ITIH3    | 118.480884  | -3.040080066 | 0.362854 | -8.378247 | 5.37E-17 | 1.08E-15 |
| 4165  | KLK13    | 3.056916303 | -3.042694394 | 0.580576 | -5.240821 | 1.60E-07 | 7.52E-07 |
| 2571  | CALB2    | 21.53944088 | -3.044141703 | 0.474883 | -6.410295 | 1.45E-10 | 1.11E-09 |
| 127   | UBE2C    | 256.2786836 | -3.044381052 | 0.255272 | -11.92601 | 8.66E-33 | 1.34E-30 |
| 1372  | COX6B2   | 2.709328151 | -3.045191672 | 0.392235 | -7.763692 | 8.25E-15 | 1.18E-13 |
| 824   | WDR86    | 24.67594665 | -3.054262767 | 0.351047 | -8.700429 | 3.31E-18 | 7.86E-17 |
| 3493  | LHFPL5   | 1.210469773 | -3.057365162 | 0.538387 | -5.678755 | 1.36E-08 | 7.61E-08 |
| 2772  | CD19     | 15.92207284 | -3.059281721 | 0.492006 | -6.21798  | 5.04E-10 | 3.56E-09 |
| 483   | MOCOS    | 192.4036892 | -3.061470626 | 0.31601  | -9.687895 | 3.39E-22 | 1.38E-20 |
| 197   | TRIM46   | 44.81454562 | -3.063385966 | 0.272106 | -11.25806 | 2.11E-29 | 2.10E-27 |
| 612   | LOX      | 10798.48518 | -3.065291781 | 0.330401 | -9.277494 | 1.74E-20 | 5.56E-19 |
| 3628  | XDH      | 13.13650614 | -3.066508843 | 0.548972 | -5.585913 | 2.32E-08 | 1.26E-07 |
| 1007  | PLA2G2D  | 54.34920262 | -3.066986637 | 0.367939 | -8.335581 | 7.71E-17 | 1.50E-15 |
| 13    | GRIN2D   | 50.92910648 | -3.074317548 | 0.208144 | -14.77015 | 2.28E-49 | 3.44E-46 |
| 7112  | CSAG3    | 1.021249007 | -3.083777514 | 0.815827 | -3.779939 | 0.000157 | 0.000432 |
| 7330  | CSMD3    | 1.066549201 | -3.087946911 | 0.837215 | -3.688355 | 0.000226 | 0.000603 |
| 9355  | SPRR2D   | 0.888119313 | -3.093287679 | 1.074649 | -2.878416 | 0.003997 | 0.008374 |
| 852   | ZBTB7C   | 258.7198207 | -3.100237072 | 0.359015 | -8.63539  | 5.85E-18 | 1.35E-16 |
| 2088  | SERPINA3 | 1519.259042 | -3.10034284  | 0.452164 | -6.856682 | 7.05E-12 | 6.62E-11 |
| 7127  | FLJ25758 | 0.98533338  | -3.104887184 | 0.82258  | -3.774572 | 0.00016  | 0.000441 |
| 2778  | MATN4    | 1.91444741  | -3.108597159 | 0.500212 | -6.214564 | 5.15E-10 | 3.63E-09 |
| 1478  | GRIK4    | 26.71791042 | -3.110401623 | 0.409302 | -7.599282 | 2.98E-14 | 3.95E-13 |
| 816   | FAM180A  | 16.93652089 | -3.116742991 | 0.35753  | -8.71744  | 2.85E-18 | 6.84E-17 |
| 2610  | OPN4     | 9.209396022 | -3.117705582 | 0.489466 | -6.369608 | 1.90E-10 | 1.42E-09 |
| 888   | APLP1    | 158.6586669 | -3.123062906 | 0.365268 | -8.55005  | 1.23E-17 | 2.72E-16 |
| 9266  | BRS3     | 3.687328042 | -3.123647875 | 1.073013 | -2.911099 | 0.003602 | 0.007619 |
| 324   | IGFBP2   | 1283.221862 | -3.125071844 | 0.299422 | -10.43703 | 1.68E-25 | 1.02E-23 |
| 1122  | LUM      | 2931.405863 | -3.132088756 | 0.385403 | -8.126792 | 4.41E-16 | 7.70E-15 |
| 21    | FCHO1    | 131.3380216 | -3.133057985 | 0.221833 | -14.12348 | 2.72E-45 | 2.54E-42 |
| 14764 | GAGE2D   | 0.82198859  | -3.136687605 | 2.904001 | -1.080126 | 0.280086 | 0.371848 |
| 7263  | XAGE1D   | 1.796656886 | -3.140454896 | 0.844384 | -3.719226 | 0.0002   | 0.000539 |
| 12863 | MAGEB2   | 0.873558376 | -3.148061718 | 1.864145 | -1.688743 | 0.091269 | 0.139078 |

|       |           |             |              |          |           |          |          |
|-------|-----------|-------------|--------------|----------|-----------|----------|----------|
| 2300  | ENTHD1    | 2.227750281 | -3.151552637 | 0.473473 | -6.656252 | 2.81E-11 | 2.39E-10 |
| 1943  | LOC152225 | 3.459590144 | -3.153778049 | 0.447919 | -7.040962 | 1.91E-12 | 1.93E-11 |
| 4060  | FAM92B    | 2.580349913 | -3.155985297 | 0.59529  | -5.301594 | 1.15E-07 | 5.54E-07 |
| 1411  | STRA6     | 33.20916492 | -3.161156217 | 0.411221 | -7.687239 | 1.50E-14 | 2.09E-13 |
| 988   | MFAP4     | 1122.088222 | -3.165666414 | 0.378552 | -8.362562 | 6.14E-17 | 1.22E-15 |
| 358   | FKBP9L    | 295.736287  | -3.166490027 | 0.309382 | -10.23488 | 1.38E-24 | 7.58E-23 |
| 11883 | CT45A5    | 0.841093776 | -3.169633186 | 1.589287 | -1.994374 | 0.046111 | 0.07606  |
| 297   | LEPREL2   | 519.2482738 | -3.172775237 | 0.300266 | -10.56654 | 4.26E-26 | 2.81E-24 |
| 1823  | MGC4473   | 16.23827525 | -3.175542323 | 0.442983 | -7.168543 | 7.58E-13 | 8.15E-12 |
| 2451  | PKP3      | 170.3565053 | -3.177786896 | 0.487986 | -6.512049 | 7.41E-11 | 5.93E-10 |
| 2302  | CHRNA1    | 25.56883588 | -3.180314842 | 0.478068 | -6.652426 | 2.88E-11 | 2.45E-10 |
| 2916  | PDIA2     | 4.035770682 | -3.188186305 | 0.522699 | -6.099475 | 1.06E-09 | 7.15E-09 |
| 3843  | KLK10     | 13.16983809 | -3.189097676 | 0.586484 | -5.437652 | 5.40E-08 | 2.75E-07 |
| 1475  | SFN       | 256.2105848 | -3.190310967 | 0.419642 | -7.602456 | 2.91E-14 | 3.86E-13 |
| 180   | SERPINF1  | 1925.399823 | -3.196002279 | 0.280092 | -11.41056 | 3.70E-30 | 4.03E-28 |
| 5417  | RTP3      | 3.372157575 | -3.197234272 | 0.701585 | -4.55716  | 5.19E-06 | 1.88E-05 |
| 7773  | IGF2AS    | 1.262001609 | -3.197431244 | 0.911211 | -3.50899  | 0.00045  | 0.001134 |
| 6692  | CAMKV     | 1.865913193 | -3.202135258 | 0.812084 | -3.943106 | 8.04E-05 | 0.000236 |
| 2365  | GRIN3B    | 7.926522003 | -3.211380689 | 0.48705  | -6.593536 | 4.29E-11 | 3.56E-10 |
| 1443  | PNOC      | 24.74276553 | -3.217854968 | 0.421168 | -7.640308 | 2.17E-14 | 2.94E-13 |
| 1332  | POU2AF1   | 184.2430697 | -3.218198535 | 0.411547 | -7.819769 | 5.29E-15 | 7.79E-14 |
| 1036  | SLC1A7    | 33.31525381 | -3.218460385 | 0.389216 | -8.269089 | 1.35E-16 | 2.55E-15 |
| 1745  | MAST1     | 12.00876128 | -3.219330556 | 0.44407  | -7.249608 | 4.18E-13 | 4.70E-12 |
| 3488  | CRYGN     | 1.297183041 | -3.226925114 | 0.567823 | -5.682982 | 1.32E-08 | 7.44E-08 |
| 70    | COL5A1    | 4139.64062  | -3.228227362 | 0.25414  | -12.70253 | 5.72E-37 | 1.60E-34 |
| 424   | RARRES1   | 634.0639216 | -3.229318821 | 0.324463 | -9.952818 | 2.45E-23 | 1.13E-21 |
| 1037  | C9orf44   | 23.68679792 | -3.234117651 | 0.391355 | -8.263908 | 1.41E-16 | 2.66E-15 |
| 1280  | C1QL1     | 1110.343535 | -3.261366568 | 0.413398 | -7.889168 | 3.04E-15 | 4.66E-14 |
| 2330  | TREML3    | 2.688062007 | -3.262190035 | 0.492382 | -6.625328 | 3.46E-11 | 2.91E-10 |
| 895   | GJB3      | 14.44753196 | -3.270069335 | 0.383003 | -8.537971 | 1.37E-17 | 2.99E-16 |
| 391   | MFSD2A    | 187.1148143 | -3.274598597 | 0.324552 | -10.0896  | 6.14E-24 | 3.08E-22 |
| 3387  | FGF5      | 16.78841878 | -3.277766449 | 0.569458 | -5.755938 | 8.62E-09 | 4.99E-08 |
| 3558  | SNTG2     | 2.613250598 | -3.281444708 | 0.58297  | -5.62884  | 1.81E-08 | 9.99E-08 |
| 111   | COL6A3    | 8185.683341 | -3.282158208 | 0.269509 | -12.17829 | 4.06E-34 | 7.16E-32 |
| 1667  | KIAA0125  | 40.22370053 | -3.283773204 | 0.447402 | -7.339641 | 2.14E-13 | 2.52E-12 |
| 3057  | CXorf22   | 6.908038162 | -3.289358624 | 0.548889 | -5.992758 | 2.06E-09 | 1.32E-08 |
| 1445  | TMPRSS6   | 30.13247963 | -3.293589463 | 0.431131 | -7.639414 | 2.18E-14 | 2.96E-13 |
| 393   | TM4SF19   | 25.38520761 | -3.298999964 | 0.327171 | -10.08341 | 6.54E-24 | 3.26E-22 |
| 3801  | TUBA3C    | 11.4827268  | -3.300625855 | 0.603016 | -5.473531 | 4.41E-08 | 2.27E-07 |
| 4999  | SERPINB2  | 4.09630827  | -3.307729688 | 0.692787 | -4.774523 | 1.80E-06 | 7.06E-06 |
| 6074  | KRT78     | 0.979428282 | -3.311290244 | 0.782447 | -4.231965 | 2.32E-05 | 7.48E-05 |
| 1218  | KREMEN2   | 17.14214882 | -3.312214663 | 0.414212 | -7.996417 | 1.28E-15 | 2.06E-14 |
| 27    | MYBL2     | 227.1746833 | -3.318923314 | 0.23883  | -13.89658 | 6.64E-44 | 4.82E-41 |
| 363   | F3        | 481.4647238 | -3.321941867 | 0.32479  | -10.22796 | 1.49E-24 | 8.02E-23 |
| 10256 | DEFB103B  | 1.033348653 | -3.323835873 | 1.296788 | -2.56313  | 0.010373 | 0.019825 |
| 5101  | RPSAP52   | 1.194663742 | -3.324140248 | 0.70322  | -4.727027 | 2.28E-06 | 8.75E-06 |
| 1362  | LOC84740  | 57.45993004 | -3.325141574 | 0.427726 | -7.774005 | 7.60E-15 | 1.09E-13 |

|      |            |             |              |          |           |          |          |
|------|------------|-------------|--------------|----------|-----------|----------|----------|
| 917  | MT1A       | 65.30830261 | -3.330877272 | 0.392131 | -8.494301 | 1.99E-17 | 4.26E-16 |
| 428  | ADD2       | 62.58684025 | -3.337021897 | 0.336153 | -9.927102 | 3.17E-23 | 1.45E-21 |
| 1099 | ITIH4      | 401.8088423 | -3.339485154 | 0.409169 | -8.161633 | 3.31E-16 | 5.89E-15 |
| 741  | P2RX6      | 13.0200662  | -3.346347309 | 0.375458 | -8.912696 | 4.98E-19 | 1.32E-17 |
| 3680 | AMPD1      | 11.12565603 | -3.353908245 | 0.604144 | -5.551509 | 2.83E-08 | 1.51E-07 |
| 270  | ISLR       | 665.0850878 | -3.355673246 | 0.312446 | -10.74    | 6.60E-27 | 4.80E-25 |
| 1797 | PPP1R14D   | 188.7242082 | -3.36333827  | 0.467516 | -7.194067 | 6.29E-13 | 6.86E-12 |
| 302  | RGS17      | 11.01138621 | -3.365416742 | 0.319588 | -10.53048 | 6.25E-26 | 4.06E-24 |
| 2831 | KRT16      | 4.351951416 | -3.371534693 | 0.547068 | -6.162918 | 7.14E-10 | 4.94E-09 |
| 4114 | MMP12      | 40.13113328 | -3.37222766  | 0.639572 | -5.272629 | 1.34E-07 | 6.41E-07 |
| 1187 | SCRG1      | 11.15701094 | -3.375105884 | 0.42037  | -8.028884 | 9.84E-16 | 1.62E-14 |
| 5872 | NKX2-5     | 2.099454363 | -3.382852093 | 0.78018  | -4.335987 | 1.45E-05 | 4.84E-05 |
| 1519 | FCRL5      | 101.6989716 | -3.38889563  | 0.44984  | -7.533564 | 4.94E-14 | 6.37E-13 |
| 354  | PLXNB3     | 159.3389873 | -3.389221078 | 0.330578 | -10.25242 | 1.15E-24 | 6.39E-23 |
| 4856 | NKX2-8     | 1.501533985 | -3.393998626 | 0.698161 | -4.861338 | 1.17E-06 | 4.71E-06 |
| 2306 | IFZp434J02 | 6.996729887 | -3.403723266 | 0.511915 | -6.649004 | 2.95E-11 | 2.51E-10 |
| 798  | CD79A      | 193.7437345 | -3.404647495 | 0.388781 | -8.757229 | 2.00E-18 | 4.92E-17 |
| 1100 | NTRK1      | 8.65012324  | -3.407038922 | 0.417504 | -8.160492 | 3.34E-16 | 5.95E-15 |
| 5022 | CNPY1      | 1.970105644 | -3.413368707 | 0.71671  | -4.762553 | 1.91E-06 | 7.46E-06 |
| 5980 | TUBAL3     | 10.58381353 | -3.414882847 | 0.798265 | -4.277879 | 1.89E-05 | 6.18E-05 |
| 1578 | PPYR1      | 15.67000903 | -3.425849152 | 0.459475 | -7.456009 | 8.92E-14 | 1.11E-12 |
| 3029 | PRSS3      | 6.364374777 | -3.428312184 | 0.570345 | -6.010945 | 1.84E-09 | 1.19E-08 |
| 1440 | APOA1      | 5.681034569 | -3.428750508 | 0.44862  | -7.642889 | 2.12E-14 | 2.89E-13 |
| 1758 | CCL11      | 13.53947457 | -3.428949796 | 0.474186 | -7.231237 | 4.79E-13 | 5.34E-12 |
| 1357 | EGFL6      | 19.87816747 | -3.430609351 | 0.440624 | -7.785804 | 6.93E-15 | 1.00E-13 |
| 138  | LAMB3      | 1002.394394 | -3.434351676 | 0.292047 | -11.75957 | 6.31E-32 | 8.96E-30 |
| 42   | SPOCD1     | 36.5041716  | -3.438663275 | 0.258441 | -13.30539 | 2.15E-40 | 1.01E-37 |
| 8025 | KRT27      | 1.300332314 | -3.451844143 | 1.014884 | -3.401222 | 0.000671 | 0.001639 |
| 456  | COL22A1    | 169.7279602 | -3.466736666 | 0.3547   | -9.773716 | 1.46E-22 | 6.28E-21 |
| 6464 | FETUB      | 1.374190891 | -3.469415531 | 0.857946 | -4.043862 | 5.26E-05 | 0.000159 |
| 1686 | IBSP       | 31.44174488 | -3.479573936 | 0.475783 | -7.313362 | 2.61E-13 | 3.03E-12 |
| 1087 | B3GALT5    | 31.46049635 | -3.486637352 | 0.426216 | -8.180442 | 2.83E-16 | 5.10E-15 |
| 7507 | DUSP13     | 1.619637076 | -3.506559744 | 0.970143 | -3.614479 | 0.000301 | 0.000786 |
| 530  | SYCE1L     | 34.3231721  | -3.511971906 | 0.368794 | -9.522857 | 1.68E-21 | 6.23E-20 |
| 5027 | LOC283867  | 1.301306912 | -3.520529665 | 0.739476 | -4.760845 | 1.93E-06 | 7.52E-06 |
| 6194 | FAM9B      | 1.36353698  | -3.522965699 | 0.843344 | -4.177376 | 2.95E-05 | 9.33E-05 |
| 1079 | ADAM6      | 37835.56508 | -3.52368937  | 0.430226 | -8.19032  | 2.61E-16 | 4.73E-15 |
| 6911 | APCS       | 14.43777991 | -3.523945666 | 0.913125 | -3.859213 | 0.000114 | 0.000323 |
| 1388 | CHIT1      | 281.0071633 | -3.527489491 | 0.456392 | -7.729071 | 1.08E-14 | 1.53E-13 |
| 2688 | DQX1       | 2.929496221 | -3.527801682 | 0.560704 | -6.291737 | 3.14E-10 | 2.29E-09 |
| 1322 | LMO1       | 14.19550304 | -3.534509587 | 0.451278 | -7.832215 | 4.79E-15 | 7.11E-14 |
| 967  | MFAP5      | 79.42434284 | -3.541361519 | 0.421377 | -8.404269 | 4.31E-17 | 8.73E-16 |
| 47   | CTHRC1     | 858.5130515 | -3.550461908 | 0.268172 | -13.2395  | 5.19E-40 | 2.16E-37 |
| 421  | TGM1       | 64.30746039 | -3.554010976 | 0.3569   | -9.957997 | 2.33E-23 | 1.08E-21 |
| 2057 | HAS2AS     | 1.755933386 | -3.561222694 | 0.51665  | -6.892911 | 5.47E-12 | 5.21E-11 |
| 952  | FXYD3      | 55.71335799 | -3.561693864 | 0.421836 | -8.44332  | 3.08E-17 | 6.35E-16 |
| 78   | IL2RA      | 112.9036247 | -3.562209982 | 0.283343 | -12.57206 | 3.01E-36 | 7.49E-34 |

|       |           |             |              |          |           |          |          |
|-------|-----------|-------------|--------------|----------|-----------|----------|----------|
| 620   | BCAS1     | 19.31996747 | -3.565077418 | 0.385425 | -9.249741 | 2.25E-20 | 7.11E-19 |
| 987   | KRT15     | 16.58070271 | -3.582377931 | 0.428321 | -8.363778 | 6.07E-17 | 1.21E-15 |
| 10486 | LIPI      | 1.251032247 | -3.600137646 | 1.453652 | -2.476616 | 0.013263 | 0.024793 |
| 281   | B4GALNT1  | 229.516752  | -3.601512555 | 0.337329 | -10.67656 | 1.31E-26 | 9.14E-25 |
| 6272  | SOX1      | 7.09697428  | -3.603844255 | 0.86923  | -4.146019 | 3.38E-05 | 0.000106 |
| 3     | C1R       | 9903.624723 | -3.623095412 | 0.221996 | -16.32054 | 7.05E-60 | 4.61E-56 |
| 32    | CLIC3     | 46.32045867 | -3.624658896 | 0.267185 | -13.56609 | 6.36E-42 | 3.90E-39 |
| 5854  | RTBDN     | 1.748751848 | -3.628195725 | 0.835243 | -4.343881 | 1.40E-05 | 4.69E-05 |
| 5241  | KRT34     | 1.91248431  | -3.63427278  | 0.780615 | -4.655655 | 3.23E-06 | 1.21E-05 |
| 850   | MAGED4    | 96.82405615 | -3.634316194 | 0.420842 | -8.635824 | 5.83E-18 | 1.34E-16 |
| 72    | ATP8B3    | 287.2075602 | -3.641321972 | 0.287563 | -12.66268 | 9.52E-37 | 2.59E-34 |
| 204   | PTGIS     | 769.0778674 | -3.646962537 | 0.325667 | -11.19844 | 4.15E-29 | 3.99E-27 |
| 19    | COL1A1    | 30108.95519 | -3.660865625 | 0.258232 | -14.17664 | 1.28E-45 | 1.32E-42 |
| 1857  | KCNK12    | 2.727484603 | -3.667927147 | 0.514533 | -7.128659 | 1.01E-12 | 1.07E-11 |
| 3078  | OTX1      | 4.053721046 | -3.670071024 | 0.613982 | -5.977489 | 2.27E-09 | 1.44E-08 |
| 2509  | CRYAA     | 51.14089849 | -3.682205794 | 0.570507 | -6.454266 | 1.09E-10 | 8.50E-10 |
| 1683  | SLPI      | 651.6444134 | -3.683980055 | 0.503437 | -7.317661 | 2.52E-13 | 2.94E-12 |
| 408   | FLNC      | 1068.787767 | -3.702839706 | 0.369797 | -10.01318 | 1.33E-23 | 6.40E-22 |
| 3215  | CRHR1     | 2.375279082 | -3.708451926 | 0.631016 | -5.876952 | 4.18E-09 | 2.55E-08 |
| 477   | CCL13     | 20.65452404 | -3.71060034  | 0.382339 | -9.704993 | 2.87E-22 | 1.18E-20 |
| 923   | DNAJB13   | 103.2559714 | -3.720614834 | 0.438519 | -8.484496 | 2.17E-17 | 4.60E-16 |
| 5394  | ZNF280A   | 1.485550226 | -3.720815209 | 0.814534 | -4.568029 | 4.92E-06 | 1.79E-05 |
| 1010  | GREM2     | 9.089382844 | -3.721585097 | 0.446975 | -8.326156 | 8.35E-17 | 1.62E-15 |
| 2494  | C5orf38   | 26.46103166 | -3.722302118 | 0.575244 | -6.470824 | 9.75E-11 | 7.66E-10 |
| 543   | RSPO4     | 32.61796825 | -3.723112978 | 0.392673 | -9.481459 | 2.51E-21 | 9.05E-20 |
| 4950  | ZAN       | 3.0885827   | -3.734248627 | 0.778512 | -4.796647 | 1.61E-06 | 6.39E-06 |
| 119   | SYT12     | 154.0070105 | -3.736007826 | 0.309733 | -12.06202 | 1.68E-33 | 2.76E-31 |
| 4095  | DC1002718 | 30.83755227 | -3.755681301 | 0.710832 | -5.283498 | 1.27E-07 | 6.07E-07 |
| 2056  | TUBA3D    | 268.0755836 | -3.756384888 | 0.544763 | -6.895446 | 5.37E-12 | 5.12E-11 |
| 1193  | LEMD1     | 4.252529273 | -3.759439941 | 0.468463 | -8.025049 | 1.01E-15 | 1.67E-14 |
| 2786  | DIO3OS    | 3.578380621 | -3.768127351 | 0.607236 | -6.205375 | 5.46E-10 | 3.84E-09 |
| 6446  | ADAM7     | 1.466767561 | -3.768577797 | 0.930222 | -4.051267 | 5.09E-05 | 0.000155 |
| 1405  | RASGEF1C  | 25.58944761 | -3.781312225 | 0.491043 | -7.700575 | 1.35E-14 | 1.89E-13 |
| 3187  | F2        | 245.7412091 | -3.786520587 | 0.64285  | -5.890211 | 3.86E-09 | 2.37E-08 |
| 1256  | LHX2      | 4.660495287 | -3.78925285  | 0.478355 | -7.921429 | 2.35E-15 | 3.66E-14 |
| 756   | SFRP2     | 1314.478809 | -3.790869569 | 0.427409 | -8.869417 | 7.35E-19 | 1.91E-17 |
| 2820  | C21orf84  | 2.954827322 | -3.792015069 | 0.614441 | -6.171486 | 6.77E-10 | 4.70E-09 |
| 1060  | WNT7B     | 27.32133885 | -3.793746309 | 0.461095 | -8.227696 | 1.91E-16 | 3.53E-15 |
| 8275  | CT45A1    | 1.566272629 | -3.799688348 | 1.150441 | -3.302812 | 0.000957 | 0.002267 |
| 505   | C10orf81  | 17.78242181 | -3.805958276 | 0.396829 | -9.590939 | 8.73E-22 | 3.39E-20 |
| 2445  | TNNT3     | 10.38910858 | -3.820407717 | 0.586443 | -6.514548 | 7.29E-11 | 5.84E-10 |
| 1901  | CCL7      | 3.712615303 | -3.825168438 | 0.539836 | -7.085799 | 1.38E-12 | 1.43E-11 |
| 4839  | REG3A     | 1.602848771 | -3.834706336 | 0.787399 | -4.87009  | 1.12E-06 | 4.52E-06 |
| 841   | PADII     | 240.4263251 | -3.838628593 | 0.443756 | -8.650317 | 5.14E-18 | 1.20E-16 |
| 7836  | ZFP42     | 1.693052578 | -3.845936279 | 1.104455 | -3.482203 | 0.000497 | 0.001244 |
| 890   | SPINK13   | 119.7934523 | -3.848736267 | 0.450453 | -8.544155 | 1.29E-17 | 2.85E-16 |
| 46    | SERPINE1  | 19219.96684 | -3.869531224 | 0.291984 | -13.25255 | 4.36E-40 | 1.86E-37 |

|       |          |             |              |          |           |          |          |
|-------|----------|-------------|--------------|----------|-----------|----------|----------|
| 4676  | WFDC12   | 1.975798936 | -3.8763555   | 0.783651 | -4.946533 | 7.55E-07 | 3.17E-06 |
| 1298  | CDHR4    | 2.763501037 | -3.878785455 | 0.493006 | -7.867619 | 3.61E-15 | 5.46E-14 |
| 1423  | SCNN1B   | 248.5573791 | -3.882318893 | 0.505773 | -7.676018 | 1.64E-14 | 2.26E-13 |
| 3758  | AGR2     | 17.89763688 | -3.885388618 | 0.706177 | -5.502003 | 3.75E-08 | 1.96E-07 |
| 104   | TREM1    | 126.7210999 | -3.886009237 | 0.317753 | -12.22964 | 2.16E-34 | 4.07E-32 |
| 131   | MFI2     | 169.4745265 | -3.898194514 | 0.329584 | -11.82764 | 2.81E-32 | 4.20E-30 |
| 11    | ADAMTS14 | 121.3054014 | -3.899525106 | 0.259437 | -15.03069 | 4.62E-51 | 8.24E-48 |
| 11153 | ST8SIA3  | 1.693173811 | -3.914125007 | 1.75005  | -2.23658  | 0.025314 | 0.044488 |
| 2159  | KLF17    | 2.528702714 | -3.921366395 | 0.576697 | -6.799698 | 1.05E-11 | 9.52E-11 |
| 3568  | REG1B    | 22.48248116 | -3.924800776 | 0.697829 | -5.624301 | 1.86E-08 | 1.02E-07 |
| 294   | COL10A1  | 65.46914471 | -3.93524311  | 0.371315 | -10.59812 | 3.04E-26 | 2.03E-24 |
| 1310  | C10orf90 | 3.009132478 | -3.940299722 | 0.502015 | -7.848964 | 4.19E-15 | 6.28E-14 |
| 249   | TCHH     | 94.71515842 | -3.958745181 | 0.364876 | -10.84956 | 2.00E-27 | 1.58E-25 |
| 121   | CILP2    | 23.12524859 | -3.959329099 | 0.328498 | -12.05281 | 1.87E-33 | 3.04E-31 |
| 61    | AIM1L    | 15.06807595 | -3.966329555 | 0.307585 | -12.89509 | 4.80E-38 | 1.54E-35 |
| 978   | TRPC2    | 47.99359665 | -3.968225621 | 0.473526 | -8.380169 | 5.29E-17 | 1.06E-15 |
| 1254  | VSTM2L   | 102.3507282 | -3.977991788 | 0.502045 | -7.923583 | 2.31E-15 | 3.61E-14 |
| 90    | HAMP     | 35.66505995 | -3.999745958 | 0.321368 | -12.44601 | 1.47E-35 | 3.20E-33 |
| 6178  | TNNI3    | 5.589066275 | -4.0285316   | 0.962178 | -4.186888 | 2.83E-05 | 8.97E-05 |
| 698   | CCL19    | 104.6061992 | -4.036989422 | 0.44719  | -9.027463 | 1.76E-19 | 4.93E-18 |
| 1104  | PTGER1   | 7.681849298 | -4.058942522 | 0.497668 | -8.155917 | 3.47E-16 | 6.15E-15 |
| 5114  | GATA4    | 2.327734839 | -4.061350908 | 0.860172 | -4.721556 | 2.34E-06 | 8.97E-06 |
| 16    | ADAM12   | 594.5671151 | -4.066844275 | 0.279251 | -14.56341 | 4.80E-48 | 5.88E-45 |
| 662   | PKP1     | 426.3622951 | -4.077218196 | 0.446303 | -9.135534 | 6.51E-20 | 1.93E-18 |
| 29    | GFPT2    | 598.4004892 | -4.079223847 | 0.296207 | -13.77151 | 3.78E-43 | 2.56E-40 |
| 1013  | C4orf26  | 3.081471893 | -4.108523711 | 0.493956 | -8.317585 | 8.98E-17 | 1.74E-15 |
| 143   | WFDC3    | 23.56516951 | -4.110608208 | 0.352093 | -11.67477 | 1.72E-31 | 2.35E-29 |
| 48    | PDGFRL   | 191.1753376 | -4.111842973 | 0.310854 | -13.22759 | 6.08E-40 | 2.48E-37 |
| 1771  | NMU      | 23.37499993 | -4.116272632 | 0.570226 | -7.218669 | 5.25E-13 | 5.81E-12 |
| 365   | COL17A1  | 37.80089064 | -4.11677049  | 0.40275  | -10.22164 | 1.59E-24 | 8.52E-23 |
| 1456  | ZPLD1    | 18.41600249 | -4.118119172 | 0.539756 | -7.629601 | 2.35E-14 | 3.17E-13 |
| 2076  | CXorf30  | 17.81897789 | -4.11948514  | 0.59923  | -6.874634 | 6.21E-12 | 5.87E-11 |
| 874   | EYA1     | 55.42917967 | -4.123234733 | 0.479981 | -8.590411 | 8.67E-18 | 1.94E-16 |
| 2658  | C12orf36 | 140.93455   | -4.130018544 | 0.653502 | -6.319828 | 2.62E-10 | 1.93E-09 |
| 1066  | KIRREL3  | 12.73162431 | -4.133421247 | 0.503076 | -8.216295 | 2.10E-16 | 3.86E-15 |
| 264   | NIPAL4   | 21.99891162 | -4.135239    | 0.384269 | -10.76132 | 5.24E-27 | 3.89E-25 |
| 246   | COL7A1   | 194.0523049 | -4.138808402 | 0.380658 | -10.87279 | 1.55E-27 | 1.24E-25 |
| 341   | CPNE7    | 122.958388  | -4.17310292  | 0.403301 | -10.34737 | 4.30E-25 | 2.47E-23 |
| 174   | HS3ST3A1 | 68.72163622 | -4.176523849 | 0.364482 | -11.4588  | 2.12E-30 | 2.39E-28 |
| 5816  | C17orf93 | 2.439561215 | -4.195236591 | 0.960898 | -4.365954 | 1.27E-05 | 4.27E-05 |
| 5568  | CALY     | 2.372642892 | -4.219233698 | 0.93986  | -4.489214 | 7.15E-06 | 2.52E-05 |
| 869   | PLA2G4D  | 9.644115441 | -4.224551211 | 0.491131 | -8.601675 | 7.86E-18 | 1.77E-16 |
| 4050  | MS4A8B   | 2.295219916 | -4.23117183  | 0.797369 | -5.306418 | 1.12E-07 | 5.41E-07 |
| 1714  | KRT14    | 10.34437205 | -4.233390827 | 0.581182 | -7.284104 | 3.24E-13 | 3.70E-12 |
| 7621  | NEUROD4  | 2.208282865 | -4.239426507 | 1.187282 | -3.5707   | 0.000356 | 0.000916 |
| 248   | MARCO    | 151.4774629 | -4.240969815 | 0.390732 | -10.85392 | 1.91E-27 | 1.51E-25 |
| 362   | GREM1    | 166.5109665 | -4.249833409 | 0.415402 | -10.23064 | 1.45E-24 | 7.83E-23 |



|      |           |             |              |          |           |          |          |
|------|-----------|-------------|--------------|----------|-----------|----------|----------|
| 1301 | TUBA3E    | 57.20718486 | -4.259292759 | 0.541534 | -7.865237 | 3.68E-15 | 5.55E-14 |
| 2188 | ZIC2      | 15.22406809 | -4.263032779 | 0.62947  | -6.772413 | 1.27E-11 | 1.13E-10 |
| 752  | B4GALNT4  | 58.72475345 | -4.297133579 | 0.483654 | -8.884735 | 6.41E-19 | 1.67E-17 |
| 884  | CDH15     | 17.63149014 | -4.299962338 | 0.502349 | -8.55972  | 1.13E-17 | 2.51E-16 |
| 240  | CCL26     | 10.84532106 | -4.301079504 | 0.393755 | -10.92324 | 8.93E-28 | 7.26E-26 |
| 1709 | CRNA001c  | 2.116703724 | -4.30553912  | 0.590868 | -7.286799 | 3.17E-13 | 3.64E-12 |
| 2515 | TCN1      | 16.66553758 | -4.306966849 | 0.667757 | -6.449903 | 1.12E-10 | 8.72E-10 |
| 118  | CPXM1     | 309.5813209 | -4.329879185 | 0.358285 | -12.08501 | 1.27E-33 | 2.11E-31 |
| 6181 | CHAT      | 7.043462034 | -4.340232251 | 1.037223 | -4.184474 | 2.86E-05 | 9.06E-05 |
| 676  | UCN2      | 4.432871209 | -4.345668969 | 0.478478 | -9.082276 | 1.06E-19 | 3.08E-18 |
| 2895 | FGB       | 6994.175212 | -4.351883677 | 0.711735 | -6.11447  | 9.69E-10 | 6.56E-09 |
| 189  | LRRC15    | 81.00174194 | -4.353475931 | 0.384774 | -11.31438 | 1.11E-29 | 1.16E-27 |
| 442  | MGC29506  | 435.2585413 | -4.357003358 | 0.442877 | -9.837946 | 7.73E-23 | 3.42E-21 |
| 35   | SRPX2     | 339.5623014 | -4.366844835 | 0.324003 | -13.47777 | 2.11E-41 | 1.18E-38 |
| 266  | PCBP3     | 110.1375045 | -4.370409448 | 0.406749 | -10.74473 | 6.27E-27 | 4.62E-25 |
| 57   | MUC12     | 68.25812062 | -4.38920126  | 0.338785 | -12.95572 | 2.18E-38 | 7.50E-36 |
| 468  | TMEM145   | 49.78045127 | -4.392225681 | 0.450794 | -9.743309 | 1.97E-22 | 8.25E-21 |
| 1174 | WFDC10B   | 2.754738589 | -4.441344327 | 0.55136  | -8.055251 | 7.93E-16 | 1.32E-14 |
| 150  | ITPKA     | 161.8034711 | -4.480254267 | 0.384899 | -11.64008 | 2.58E-31 | 3.37E-29 |
| 187  | KRT19     | 5889.731722 | -4.484275856 | 0.395293 | -11.34418 | 7.93E-30 | 8.31E-28 |
| 214  | PPP2R2C   | 96.94831468 | -4.504625868 | 0.406824 | -11.07265 | 1.70E-28 | 1.56E-26 |
| 1807 | LOC15391C | 4.263865158 | -4.529436487 | 0.630709 | -7.181503 | 6.89E-13 | 7.48E-12 |
| 2483 | OC1001923 | 3.331046101 | -4.530043728 | 0.698433 | -6.486008 | 8.81E-11 | 6.96E-10 |
| 5694 | NR0B1     | 3.478056356 | -4.534665782 | 1.02521  | -4.423157 | 9.73E-06 | 3.35E-05 |
| 1429 | GSG1      | 14.57657475 | -4.535412035 | 0.591715 | -7.664862 | 1.79E-14 | 2.46E-13 |
| 2468 | UCA1      | 3.335949974 | -4.536184822 | 0.698009 | -6.498746 | 8.10E-11 | 6.43E-10 |
| 1565 | IGFL2     | 5.920994396 | -4.53760483  | 0.607094 | -7.474302 | 7.76E-14 | 9.72E-13 |
| 1889 | C20orf141 | 2.623563206 | -4.557157532 | 0.642237 | -7.095755 | 1.29E-12 | 1.33E-11 |
| 3415 | RPTN      | 2.88858545  | -4.571982747 | 0.796845 | -5.737605 | 9.60E-09 | 5.51E-08 |
| 533  | C5orf46   | 412.4407849 | -4.612931071 | 0.484917 | -9.512825 | 1.86E-21 | 6.82E-20 |
| 1606 | TEX19     | 4.726435047 | -4.624410753 | 0.623551 | -7.416246 | 1.20E-13 | 1.47E-12 |
| 1509 | SCNN1G    | 217.4515473 | -4.631510449 | 0.61304  | -7.554987 | 4.19E-14 | 5.44E-13 |
| 162  | NEB       | 538.4447327 | -4.638307265 | 0.400484 | -11.58174 | 5.10E-31 | 6.14E-29 |
| 159  | LOC96610  | 31921.69925 | -4.665869346 | 0.402383 | -11.59559 | 4.34E-31 | 5.35E-29 |
| 2859 | PADI3     | 178.9104322 | -4.675302163 | 0.761863 | -6.13667  | 8.43E-10 | 5.78E-09 |
| 774  | ANXA8     | 34.07457804 | -4.67924834  | 0.530251 | -8.824595 | 1.10E-18 | 2.78E-17 |
| 6    | PODNL1    | 89.16416399 | -4.688374156 | 0.29508  | -15.88849 | 7.61E-57 | 2.49E-53 |
| 1905 | ORM1      | 9.217636032 | -4.693877026 | 0.662677 | -7.083208 | 1.41E-12 | 1.45E-11 |
| 276  | MYO1A     | 17.40108236 | -4.698474241 | 0.438875 | -10.70572 | 9.57E-27 | 6.80E-25 |
| 5    | TGFBI     | 54976.30749 | -4.713795184 | 0.296329 | -15.90731 | 5.64E-57 | 2.45E-53 |
| 1660 | EPO       | 460.7134212 | -4.731506015 | 0.644286 | -7.3438   | 2.08E-13 | 2.45E-12 |
| 58   | IL6       | 275.661551  | -4.747108594 | 0.366832 | -12.94081 | 2.65E-38 | 8.95E-36 |
| 23   | MMP9      | 1470.67855  | -4.747954968 | 0.338872 | -14.01104 | 1.33E-44 | 1.14E-41 |
| 1832 | TMEM196   | 4.050984931 | -4.761928264 | 0.664588 | -7.16523  | 7.77E-13 | 8.32E-12 |
| 2278 | APOC3     | 5.887331454 | -4.772122517 | 0.71526  | -6.671868 | 2.53E-11 | 2.17E-10 |
| 374  | CST2      | 6.583379433 | -4.817696072 | 0.474853 | -10.14567 | 3.46E-24 | 1.81E-22 |
| 172  | CHRD2     | 72.05467005 | -4.819274007 | 0.418839 | -11.50627 | 1.23E-30 | 1.40E-28 |

|      |           |             |              |          |           |          |          |
|------|-----------|-------------|--------------|----------|-----------|----------|----------|
| 1264 | SLAMF9    | 6.119658661 | -4.829482635 | 0.610585 | -7.909604 | 2.58E-15 | 4.00E-14 |
| 6665 | ORM2      | 2.903256753 | -4.832057796 | 1.221426 | -3.956078 | 7.62E-05 | 0.000224 |
| 155  | IL20RB    | 1174.226487 | -4.857221177 | 0.418395 | -11.60918 | 3.70E-31 | 4.68E-29 |
| 1194 | GJB6      | 9.338147802 | -4.878752412 | 0.60823  | -8.021223 | 1.05E-15 | 1.72E-14 |
| 2343 | FGG       | 5033.429729 | -4.879737428 | 0.737837 | -6.613575 | 3.75E-11 | 3.14E-10 |
| 453  | C5orf27   | 470.8978544 | -4.880175298 | 0.498358 | -9.792515 | 1.21E-22 | 5.25E-21 |
| 2545 | KRT25     | 7.48264301  | -4.886773175 | 0.760208 | -6.428207 | 1.29E-10 | 9.94E-10 |
| 4577 | ROS1      | 6.626206679 | -4.88868144  | 0.978222 | -4.997519 | 5.81E-07 | 2.49E-06 |
| 1921 | SAA4      | 52.23792175 | -4.927847513 | 0.697716 | -7.062827 | 1.63E-12 | 1.66E-11 |
| 1156 | PLA2G2A   | 29.01248503 | -4.954673933 | 0.613171 | -8.080417 | 6.45E-16 | 1.09E-14 |
| 1481 | BARX1     | 6.169843852 | -4.96243419  | 0.653244 | -7.596597 | 3.04E-14 | 4.02E-13 |
| 1997 | C8orf22   | 208.694212  | -4.977511301 | 0.714675 | -6.964724 | 3.29E-12 | 3.23E-11 |
| 1439 | LOC442308 | 6.030585335 | -4.98887137  | 0.652413 | -7.646803 | 2.06E-14 | 2.81E-13 |
| 1361 | IVL       | 4.381996421 | -5.002661414 | 0.643501 | -7.774132 | 7.60E-15 | 1.09E-13 |
| 1734 | UGT1A10   | 151.8632599 | -5.012493332 | 0.690287 | -7.26146  | 3.83E-13 | 4.33E-12 |
| 1306 | C10orf99  | 936.654206  | -5.013175031 | 0.638226 | -7.854858 | 4.00E-15 | 6.01E-14 |
| 385  | C11orf86  | 146.0070484 | -5.12899227  | 0.50752  | -10.106   | 5.20E-24 | 2.65E-22 |
| 2061 | TBX5      | 27.43821979 | -5.135182459 | 0.745658 | -6.886782 | 5.71E-12 | 5.43E-11 |
| 88   | SLC38A5   | 848.1739267 | -5.139112924 | 0.412589 | -12.45576 | 1.30E-35 | 2.90E-33 |
| 1433 | MMP3      | 7.963782393 | -5.161199744 | 0.673748 | -7.660432 | 1.85E-14 | 2.53E-13 |
| 405  | COMP      | 258.8131634 | -5.168951743 | 0.51605  | -10.01637 | 1.29E-23 | 6.24E-22 |
| 60   | IL1R2     | 1077.100167 | -5.186235971 | 0.401662 | -12.91194 | 3.85E-38 | 1.26E-35 |
| 842  | ANXA8L2   | 21.80479808 | -5.188827989 | 0.599895 | -8.649558 | 5.17E-18 | 1.20E-16 |
| 290  | IGFBP1    | 1568.022742 | -5.234519664 | 0.492418 | -10.63023 | 2.16E-26 | 1.46E-24 |
| 1781 | SP8       | 4.53032703  | -5.295079966 | 0.734765 | -7.20649  | 5.74E-13 | 6.32E-12 |
| 2597 | UMOD      | 157.7338612 | -5.299245574 | 0.830301 | -6.38232  | 1.74E-10 | 1.32E-09 |
| 801  | GAS2L2    | 8.845580445 | -5.316912672 | 0.607506 | -8.752033 | 2.10E-18 | 5.13E-17 |
| 882  | HPR       | 17.89028041 | -5.335584224 | 0.623067 | -8.563415 | 1.10E-17 | 2.44E-16 |
| 919  | EDN3      | 8.361573072 | -5.351099386 | 0.630108 | -8.492356 | 2.02E-17 | 4.32E-16 |
| 43   | CADM3     | 964.6506064 | -5.385110733 | 0.404795 | -13.30329 | 2.22E-40 | 1.01E-37 |
| 92   | TRIM54    | 221.5710216 | -5.393107972 | 0.434475 | -12.41292 | 2.22E-35 | 4.74E-33 |
| 260  | STMN2     | 22.27191206 | -5.4153612   | 0.502073 | -10.786   | 4.01E-27 | 3.02E-25 |
| 66   | APCDD1L   | 171.3027669 | -5.440783944 | 0.424815 | -12.80741 | 1.49E-37 | 4.43E-35 |
| 190  | CXCL5     | 325.1004735 | -5.462220885 | 0.482885 | -11.31163 | 1.15E-29 | 1.19E-27 |
| 1257 | TFF2      | 8.309304719 | -5.462420825 | 0.689619 | -7.920922 | 2.36E-15 | 3.68E-14 |
| 4642 | RTL1      | 5.262749584 | -5.513472456 | 1.110044 | -4.966896 | 6.80E-07 | 2.87E-06 |
| 339  | SYT8      | 10.69459309 | -5.537971275 | 0.534448 | -10.36205 | 3.69E-25 | 2.13E-23 |
| 41   | WISP2     | 319.6295661 | -5.581829523 | 0.419298 | -13.31232 | 1.96E-40 | 9.38E-38 |
| 54   | KCNK17    | 38.62632639 | -5.601393703 | 0.429838 | -13.03142 | 8.11E-39 | 2.94E-36 |
| 239  | HMGA2     | 35.07081449 | -5.671112906 | 0.518935 | -10.92836 | 8.44E-28 | 6.92E-26 |
| 649  | CRP       | 55.0150962  | -5.771972754 | 0.629364 | -9.171116 | 4.68E-20 | 1.41E-18 |
| 5657 | S100G     | 5.861718122 | -5.850293554 | 1.316331 | -4.444395 | 8.81E-06 | 3.05E-05 |
| 357  | DMRT3     | 10.40219493 | -5.908495448 | 0.576928 | -10.2413  | 1.29E-24 | 7.11E-23 |
| 198  | ZP1       | 23.70564793 | -5.912525919 | 0.525331 | -11.25485 | 2.19E-29 | 2.17E-27 |
| 82   | COL11A1   | 301.1608749 | -5.942181432 | 0.473146 | -12.55888 | 3.55E-36 | 8.49E-34 |
| 660  | FGA       | 5327.516734 | -5.966342314 | 0.652285 | -9.146827 | 5.86E-20 | 1.74E-18 |
| 226  | SLN       | 60.09492008 | -6.062858554 | 0.551374 | -10.99591 | 4.00E-28 | 3.47E-26 |

|      |          |             |              |          |           |          |          |
|------|----------|-------------|--------------|----------|-----------|----------|----------|
| 9    | CPA4     | 120.6453979 | -6.063593211 | 0.400187 | -15.15192 | 7.36E-52 | 1.60E-48 |
| 268  | CIDEC    | 116.5420446 | -6.14671231  | 0.572246 | -10.74139 | 6.51E-27 | 4.76E-25 |
| 7    | FAM101A  | 216.0635704 | -6.216751695 | 0.398475 | -15.60134 | 7.13E-55 | 2.00E-51 |
| 2374 | C4orf7   | 11.5473766  | -6.416514104 | 0.974356 | -6.585388 | 4.54E-11 | 3.75E-10 |
| 2    | PTPRH    | 141.639771  | -6.49595744  | 0.387452 | -16.76585 | 4.34E-63 | 4.25E-59 |
| 956  | WFDC5    | 21.32369033 | -6.663110099 | 0.790083 | -8.433426 | 3.36E-17 | 6.88E-16 |
| 153  | LOC55908 | 115.6207058 | -6.671782876 | 0.574381 | -11.61561 | 3.43E-31 | 4.40E-29 |
| 24   | PI3      | 72.25546181 | -6.692262098 | 0.478101 | -13.99758 | 1.61E-44 | 1.32E-41 |
| 371  | SBSN     | 12.86503031 | -6.869624727 | 0.674952 | -10.17795 | 2.49E-24 | 1.31E-22 |
| 67   | KCNS1    | 148.5805055 | -6.873958763 | 0.538478 | -12.76553 | 2.55E-37 | 7.47E-35 |
| 236  | PAEP     | 83.01309762 | -7.106995337 | 0.649326 | -10.94519 | 7.01E-28 | 5.82E-26 |
| 292  | MMP13    | 24.72373128 | -7.113674876 | 0.670387 | -10.61129 | 2.64E-26 | 1.77E-24 |
| 169  | SAA2     | 1929.471898 | -7.166806912 | 0.622144 | -11.51954 | 1.05E-30 | 1.22E-28 |
| 1136 | SLC18A3  | 247.2307102 | -7.258705208 | 0.895072 | -8.109632 | 5.08E-16 | 8.76E-15 |
| 961  | MUC17    | 62.4056893  | -7.364171065 | 0.873923 | -8.426566 | 3.56E-17 | 7.26E-16 |
| 10   | PTPRN    | 524.7743098 | -7.746379139 | 0.513351 | -15.08983 | 1.89E-51 | 3.70E-48 |
| 69   | SAA1     | 4546.029676 | -7.808028156 | 0.613616 | -12.72461 | 4.32E-37 | 1.23E-34 |
| 15   | TNNT1    | 139.4531062 | -7.874964738 | 0.539106 | -14.60744 | 2.52E-48 | 3.51E-45 |
| 14   | LBP      | 3344.393946 | -8.543478614 | 0.58505  | -14.60299 | 2.69E-48 | 3.51E-45 |
| 1    | HP       | 2198.908358 | -8.712206253 | 0.499128 | -17.45484 | 3.16E-68 | 6.20E-64 |
| 1096 | APOA4    | 10.97467917 | -10.09141712 | 1.235622 | -8.167077 | 3.16E-16 | 5.65E-15 |
