# Supplementary material for: Prognostic and therapeutic implications of extracellular matrix associated gene signature in renal clear cell carcinoma
Source: PubMed Central journal article supplement (PMC8026590; doi:10.1038/s41598-021-86888-7), 2021-04-07
Supplement: 41598_2021_86888_MOESM7_ESM.pdf [file 41598_2021_86888_MOESM7_ESM.pdf]

## **Prognostic and therapeutic implications of extracellular matrix associated gene signature in renal clear cell carcinoma**

Pankaj Ahluwalia<sup>1</sup>, Meenakshi Ahluwalia<sup>1</sup>, Ashis K. Mondal<sup>1</sup>, Nikhil Sahajpal<sup>1</sup>, Vamsi Kota<sup>2</sup>, Mumtaz V. Rojiani<sup>1</sup>, Aryn M. Rojiani<sup>1</sup>, and Ravindra Kolhe<sup>1\*</sup>

<sup>1</sup> Department of Pathology, Medical College of Georgia, Augusta University, GA, U.S.A.

<sup>2</sup> Department of Medicine, Medical College of Georgia, Augusta University, GA, U.S.A.

\* Correspondence: rkolhe@augusta.edu; Tel.: (706)-721-2771; Fax : (706)-434-6053

**Supplementary table 5:** GSEA analysis of Low-risk patients.

|   | GS                                                                           | SIZE | ES    | NES  | NOM p-val | FD R q-val | FWE R p-val | RANK AT MAX | LEADING EDGE                   |
|---|------------------------------------------------------------------------------|------|-------|------|-----------|------------|-------------|-------------|--------------------------------|
|   | follow link to MSigDB                                                        |      |       |      |           |            |             |             |                                |
| 1 | GO_ACTIVE_ION_TRANSMEMBRANE_TRANSPORTER_ACTIVITY                             | 221  | -0.56 | -2.4 | 0         | 0          | 0           | 2162        | tags=36%, list=11%, signal=40% |
| 2 | GO_ACTIVE_TRANSMEMBRANE_TRANSPORTER_ACTIVITY                                 | 326  | -0.54 | 2.38 | 0         | 0          | 0           | 2162        | tags=31%, list=11%, signal=34% |
| 3 | GO_SECONDARY_ACTIVE_TRANSMEMBRANE_TRANSPORTER_ACTIVITY                       | 222  | -0.53 | 2.27 | 0         | 0          | 0.001       | 2162        | tags=33%, list=11%, signal=36% |
| 4 | GO_PYROPHOSPHATE_HYDROLYSIS_DRIVEN_PROTON_TRANSMEMBRANE_TRANSPORTER_ACTIVITY | 30   | -0.73 | 2.25 | 0         | 0          | 0.001       | 2224        | tags=40%, list=11%, signal=45% |
| 5 | GO_ANION_TRANSMEMBRANE_TRANSPORTER_ACTIVITY                                  | 339  | -0.5  | 2.25 | 0         | 0          | 0.001       | 1691        | tags=27%, list=8%, signal=29%  |
| 6 | GO_ORGANIC_ANION_TRANSMEMBRANE_TRANSPORTER_ACTIVITY                          | 219  | -0.52 | 2.21 | 0         | 0          | 0.001       | 1691        | tags=30%, list=8%, signal=32%  |
| 7 | GO_PROTON_TRANSMEMBRANE_TRANSPORTER_ACTIVITY                                 | 96   | -0.58 | 2.21 | 0         | 0          | 0.002       | 2224        | tags=27%, list=11%, signal=30% |
| 8 | GO_INORGANIC_ANION_TRANSMEMBRANE_TRANSPORTER_ACTIVITY                        | 143  | -0.54 | 2.18 | 0         | 0.001      | 0.003       | 2047        | tags=32%, list=10%, signal=36% |

|    |                                                               |     |       |               |   |           |           |      |                                      |
|----|---------------------------------------------------------------|-----|-------|---------------|---|-----------|-----------|------|--------------------------------------|
| 9  | GO_ORGANIC_ACID_TRANSMEMBRANE_TRANSPORTER_ACTIVITY            | 155 | -0.52 | -<br>2.1<br>5 | 0 | 0         | 0.00<br>3 | 1604 | tags=31%,<br>list=8%,<br>signal=33%  |
| 10 | GO_ANTIPORTER_ACTIVITY                                        | 74  | -0.59 | -<br>2.1<br>3 | 0 | 0.00<br>1 | 0.00<br>5 | 2012 | tags=31%,<br>list=10%,<br>signal=34% |
| 11 | GO_SYMPORTER_ACTIVITY                                         | 140 | -0.52 | -<br>2.1<br>2 | 0 | 0.00<br>1 | 0.00<br>6 | 2162 | tags=34%,<br>list=11%,<br>signal=38% |
| 12 | GO_BICARBONATE_TRANSMEMBRANE_TRANSPORTER_ACTIVITY             | 21  | -0.75 | -<br>2.0<br>9 | 0 | 0.00<br>1 | 0.00<br>8 | 1956 | tags=62%,<br>list=10%,<br>signal=69% |
| 13 | GO_SOLUTE_SODIUM_SYMPORTER_ACTIVITY                           | 72  | -0.56 | -<br>2.0<br>7 | 0 | 0.00<br>1 | 0.01<br>2 | 2313 | tags=43%,<br>list=12%,<br>signal=49% |
| 14 | GO_PROTON_EXPORTING_ATPASE_ACTIVITY_PHOSPHORYLATIVE_MECHANISM | 17  | -0.77 | -<br>2.0<br>6 | 0 | 0.00<br>2 | 0.01<br>6 | 2224 | tags=47%,<br>list=11%,<br>signal=53% |
| 15 | GO_PRIMARY_ACTIVE_TRANSMEMBRANE_TRANSPORTER_ACTIVITY          | 103 | -0.53 | -<br>2.0<br>5 | 0 | 0.00<br>2 | 0.01<br>8 | 2224 | tags=27%,<br>list=11%,<br>signal=30% |
| 16 | GO_ATPASE_COUPLED_ION_TRANSMEMBRANE_TRANSPORTER_ACTIVITY      | 57  | -0.59 | -<br>2.0<br>4 | 0 | 0.00<br>2 | 0.02<br>4 | 2224 | tags=33%,<br>list=11%,<br>signal=37% |
| 17 | GO_COA_HYDROLASE_ACTIVITY                                     | 21  | -0.72 | -<br>2.0<br>1 | 0 | 0.00<br>5 | 0.05<br>2 | 1969 | tags=43%,<br>list=10%,<br>signal=47% |
| 18 | GO_SOLUTE_CATION_SYMPORTER_ACTIVITY                           | 98  | -0.53 | -2            | 0 | 0.00<br>5 | 0.05<br>6 | 2162 | tags=37%,<br>list=11%,<br>signal=41% |
| 19 | GO_SOLUTE_ANION_ANTIPORTER_ACTIVITY                           | 28  | -0.67 | -2            | 0 | 0.00<br>5 | 0.06      | 1470 | tags=39%,<br>list=7%,<br>signal=42%  |

|                                 |                                                |     |       |                      |                      |                       |                           |                     |                                      |
|---------------------------------|------------------------------------------------|-----|-------|----------------------|----------------------|-----------------------|---------------------------|---------------------|--------------------------------------|
| 20                              | GO_CHLORIDE_TRANSMEMBRANE_TRANSPORTER_ACTIVITY | 101 | -0.51 | -1.99                | 0                    | 0.005                 | 0.069                     | 2158                | tags=33%,<br>list=11%,<br>signal=36% |
| GS                              | GS DETAILS                                     | ES  | NES   | NO<br>M<br>p-<br>val | FD<br>R<br>q-<br>val | FW<br>ER<br>p-<br>val | RAN<br>K<br>AT<br>MA<br>X | LEAD<br>ING<br>EDGE |                                      |
| follow<br>link to<br>MSigD<br>B |                                                |     |       |                      |                      |                       |                           |                     |                                      |
| 1                               | HALLMARK_FATTY_ACID_METABOLISM                 | 154 | -0.51 | -2.1                 | 0                    | 0                     | 0                         | 3898                | tags=47%,<br>list=19%,<br>signal=58% |
| 2                               | HALLMARK_OXIDATIVE_PHOSPHORYLATION             | 182 | -0.5  | -2.07                | 0                    | 0                     | 0.001                     | 5345                | tags=51%,<br>list=27%,<br>signal=69% |
| 3                               | HALLMARK_BILE_ACID_METABOLISM                  | 112 | -0.42 | -1.67                | 0                    | 0.004                 | 0.013                     | 3145                | tags=36%,<br>list=16%,<br>signal=42% |
| 4                               | HALLMARK_PROTEIN_SECRETION                     | 95  | -0.42 | -1.63                | 0                    | 0.004                 | 0.019                     | 5636                | tags=47%,<br>list=28%,<br>signal=66% |
| 5                               | HALLMARK_ANDROGEN_RESPONSE                     | 96  | -0.4  | -1.52                | 0.014                | 0.012                 | 0.066                     | 3703                | tags=28%,<br>list=19%,<br>signal=34% |
| 6                               | HALLMARK_PEROXISOME                            | 101 | -0.37 | -1.41                | 0.016                | 0.035                 | 0.218                     | 3755                | tags=31%,<br>list=19%,<br>signal=38% |

|    |                              |     |       |               |           |           |           |      |                                      |
|----|------------------------------|-----|-------|---------------|-----------|-----------|-----------|------|--------------------------------------|
| 7  | HALLMARK_APICAL_SURFACE      | 43  | -0.42 | -1.4          | 0.0<br>62 | 0.03<br>3 | 0.23<br>5 | 660  | tags=14%,<br>list=3%,<br>signal=14%  |
| 8  | HALLMARK_PANCREAS_BETA_CELLS | 39  | -0.42 | -<br>1.3<br>4 | 0.1<br>24 | 0.04<br>8 | 0.36      | 2894 | tags=36%,<br>list=14%,<br>signal=42% |
| 9  | HALLMARK_ADIPOGENESIS        | 189 | -0.3  | -<br>1.2<br>6 | 0.0<br>54 | 0.08<br>3 | 0.59<br>5 | 3145 | tags=28%,<br>list=16%,<br>signal=33% |
| 10 | HALLMARK_HEME_METABOLISM     | 190 | -0.21 | -<br>0.8<br>8 | 0.8<br>34 | 0.76<br>4 | 1         | 4723 | tags=32%,<br>list=24%,<br>signal=42% |
