# Supplementary material for: Prognostic and therapeutic implications of extracellular matrix associated gene signature in renal clear cell carcinoma
Source: PubMed Central journal article supplement (PMC8026590; doi:10.1038/s41598-021-86888-7), 2021-04-07
Supplement: 41598_2021_86888_MOESM8_ESM.pdf [file 41598_2021_86888_MOESM8_ESM.pdf]

## **Prognostic and therapeutic implications of extracellular matrix associated gene signature in renal clear cell carcinoma**

Pankaj Ahluwalia<sup>1</sup>, Meenakshi Ahluwalia<sup>1</sup>, Ashis K. Mondal<sup>1</sup>, Nikhil Sahajpal<sup>1</sup>, Vamsi Kota<sup>2</sup>, Mumtaz V. Rojiani<sup>1</sup>, Aryn M. Rojiani<sup>1</sup>, and Ravindra Kolhe<sup>1\*</sup>

<sup>1</sup> Department of Pathology, Medical College of Georgia, Augusta University, GA, U.S.A.

<sup>2</sup> Department of Medicine, Medical College of Georgia, Augusta University, GA, U.S.A.

\* Correspondence: rkolhe@augusta.edu; Tel.: (706)-721-2771; Fax :(706)-434-6053

**Supplementary table 6:** GSEA analysis of High-risk patients.

| GS                    | GS DETAILS                                      | ES  | NES  | NOM p-val | FD R q-val | FW ER p-val | RANK AT MAX | LEADING EDGE |                                |
|-----------------------|-------------------------------------------------|-----|------|-----------|------------|-------------|-------------|--------------|--------------------------------|
| follow link to MSigDB |                                                 |     |      |           |            |             |             |              |                                |
| 1                     | GO_EXTRACELLULAR_MATRIX_STRUCTURAL_CONSTITUENT  | 160 | 0.64 | 2.29      | 0          | 0           | 0           | 2951         | tags=54%, list=15%, signal=63% |
| 2                     | GO_CYTOKINE_ACTIVITY                            | 221 | 0.62 | 2.28      | 0          | 0           | 0           | 3337         | tags=46%, list=17%, signal=54% |
| 3                     | GO_CHEMOKINE_ACTIVITY                           | 47  | 0.71 | 2.13      | 0          | 0           | 0           | 3217         | tags=62%, list=16%, signal=73% |
| 4                     | GO_COLLAGEN_BINDING                             | 64  | 0.66 | 2.11      | 0          | 0           | 0           | 2459         | tags=44%, list=12%, signal=50% |
| 5                     | GO_SERINE_TYPE_ENDOPEPTIDASE_INHIBITOR_ACTIVITY | 88  | 0.62 | 2.08      | 0          | 0           | 0.001       | 1980         | tags=40%, list=10%, signal=44% |
| 6                     | GO_CHEMOKINE_RECEPTOR_BINDING                   | 60  | 0.67 | 2.07      | 0          | 0           | 0.001       | 3217         | tags=52%, list=16%, signal=61% |
| 7                     | GO_ENDOPEPTIDASE_REGULATOR_ACTIVITY             | 176 | 0.56 | 2.05      | 0          | 0           | 0.002       | 2741         | tags=38%, list=14%, signal=43% |

|    |                                                                                    |     |      |      |           |           |           |      |                                      |
|----|------------------------------------------------------------------------------------|-----|------|------|-----------|-----------|-----------|------|--------------------------------------|
| 8  | GO_CYTOKINE_RECEPTOR_BINDING                                                       | 248 | 0.54 | 2.04 | 0         | 0         | 0.00<br>2 | 3234 | tags=35%,<br>list=16%,<br>signal=42% |
| 9  | GO_PEPTIDASE_REGULATOR_ACTIVIT<br>Y                                                | 210 | 0.54 | 2    | 0         | 0.0<br>01 | 0.00<br>7 | 2741 | tags=34%,<br>list=14%,<br>signal=39% |
| 10 | GO_METALLOENDOPEPTIDASE_ACTIVI<br>TY                                               | 101 | 0.58 | 1.98 | 0         | 0.0<br>01 | 0.00<br>9 | 2166 | tags=35%,<br>list=11%,<br>signal=39% |
| 11 | GO_COMPLEMENT_BINDING                                                              | 20  | 0.77 | 1.96 | 0         | 0.0<br>01 | 0.01<br>6 | 1820 | tags=60%,<br>list=9%,<br>signal=66%  |
| 12 | GO_RECEPTOR_REGULATOR_ACTIVITY                                                     | 477 | 0.49 | 1.95 | 0         | 0.0<br>01 | 0.02      | 3343 | tags=37%,<br>list=17%,<br>signal=43% |
| 13 | GO_IMMUNE_RECEPTOR_ACTIVITY                                                        | 124 | 0.55 | 1.94 | 0         | 0.0<br>01 | 0.02<br>4 | 4055 | tags=55%,<br>list=20%,<br>signal=68% |
| 14 | GO_EXTRACELLULAR_MATRIX_STRUC<br>TURAL_CONSTITUENT_CONFERRING_T<br>ENSILE_STRENGTH | 40  | 0.66 | 1.93 | 0         | 0.0<br>02 | 0.03<br>3 | 2121 | tags=50%,<br>list=11%,<br>signal=56% |
| 15 | GO_CYTOKINE_BINDING                                                                | 127 | 0.55 | 1.93 | 0         | 0.0<br>02 | 0.03<br>4 | 3067 | tags=44%,<br>list=15%,<br>signal=52% |
| 16 | GO_CCR_CHEMOKINE_RECEPTOR_BIN<br>DING                                              | 39  | 0.66 | 1.9  | 0         | 0.0<br>02 | 0.04<br>5 | 3119 | tags=51%,<br>list=16%,<br>signal=61% |
| 17 | GO_CHEMOKINE_BINDING                                                               | 29  | 0.68 | 1.88 | 0.00<br>2 | 0.0<br>04 | 0.07<br>5 | 3427 | tags=55%,<br>list=17%,<br>signal=66% |
| 18 | GO_GLYCOSAMINOGLYCAN_BINDING                                                       | 208 | 0.51 | 1.88 | 0         | 0.0<br>04 | 0.07<br>6 | 3340 | tags=40%,<br>list=17%,<br>signal=48% |

|                       |                                            |     |      |           |            |             |             |              |                                      |
|-----------------------|--------------------------------------------|-----|------|-----------|------------|-------------|-------------|--------------|--------------------------------------|
| 19                    | GO_LIPOPOLYSACCHARIDE_BINDING              | 25  | 0.7  | 1.88      | 0          | 0.003       | 0.077       | 1520         | tags=44%,<br>list=8%,<br>signal=48%  |
| 20                    | GO_C_C_CHEMOKINE_BINDING                   | 20  | 0.74 | 1.87      | 0          | 0.004       | 0.092       | 3427         | tags=70%,<br>list=17%,<br>signal=84% |
|                       |                                            |     |      |           |            |             |             |              |                                      |
| GS                    | GS DETAILS                                 | ES  | NES  | NOM p-val | FD R q-val | FW ER p-val | RANK AT MAX | LEADING EDGE |                                      |
| follow link to MSigDB |                                            |     |      |           |            |             |             |              |                                      |
| 1                     | HALLMARK_EPITHELIAL_MESENCHYMAL_TRANSITION | 194 | 0.69 | 2.55      | 0          | 0           | 0           | 3319         | tags=58%,<br>list=17%,<br>signal=69% |
| 2                     | HALLMARK_ALLOGRAFT_REJECTION               | 195 | 0.63 | 2.35      | 0          | 0           | 0           | 4998         | tags=62%,<br>list=25%,<br>signal=81% |
| 3                     | HALLMARK_INFLAMMATORY_RESPONSE             | 197 | 0.56 | 2.07      | 0          | 0           | 0           | 3270         | tags=43%,<br>list=16%,<br>signal=51% |
| 4                     | HALLMARK_COAGULATION                       | 136 | 0.58 | 2.05      | 0          | 0           | 0           | 2205         | tags=35%,<br>list=11%,<br>signal=39% |
| 5                     | HALLMARK_E2F_TARGETS                       | 187 | 0.52 | 1.92      | 0          | 0           | 0.001       | 4619         | tags=42%,<br>list=23%,<br>signal=54% |
| 6                     | HALLMARK_IL6_JAK_STAT3_SIGNALING           | 87  | 0.56 | 1.88      | 0          | 0           | 0.001       | 3500         | tags=44%,<br>list=18%,<br>signal=53% |

|    |                                    |     |      |      |           |           |           |      |                                      |
|----|------------------------------------|-----|------|------|-----------|-----------|-----------|------|--------------------------------------|
| 7  | HALLMARK_G2M_CHECKPOINT            | 184 | 0.5  | 1.83 | 0         | 0         | 0.00<br>2 | 4421 | tags=39%,<br>list=22%,<br>signal=50% |
| 8  | HALLMARK_INTERFERON_GAMMA_RESPONSE | 196 | 0.48 | 1.8  | 0         | 0.0<br>01 | 0.00<br>5 | 5114 | tags=43%,<br>list=26%,<br>signal=57% |
| 9  | HALLMARK_COMPLEMENT                | 195 | 0.48 | 1.78 | 0         | 0.0<br>01 | 0.00<br>5 | 3305 | tags=33%,<br>list=17%,<br>signal=40% |
| 10 | HALLMARK_TNFA_SIGNALING_VIA_NFKB   | 197 | 0.47 | 1.72 | 0         | 0.0<br>01 | 0.01<br>1 | 5692 | tags=45%,<br>list=28%,<br>signal=63% |
| 11 | HALLMARK_APICAL_JUNCTION           | 194 | 0.47 | 1.71 | 0         | 0.0<br>01 | 0.01<br>1 | 4113 | tags=38%,<br>list=21%,<br>signal=47% |
| 12 | HALLMARK_HYPOXIA                   | 190 | 0.46 | 1.7  | 0         | 0.0<br>01 | 0.01<br>5 | 2913 | tags=28%,<br>list=15%,<br>signal=32% |
| 13 | HALLMARK_APOPTOSIS                 | 158 | 0.43 | 1.58 | 0         | 0.0<br>1  | 0.11<br>1 | 6215 | tags=45%,<br>list=31%,<br>signal=65% |
| 14 | HALLMARK_ANGIOGENESIS              | 36  | 0.54 | 1.54 | 0.01<br>5 | 0.0<br>14 | 0.17<br>5 | 1461 | tags=28%,<br>list=7%,<br>signal=30%  |
| 15 | HALLMARK_INTERFERON_ALPHA_RESPONSE | 92  | 0.45 | 1.52 | 0.00<br>8 | 0.0<br>18 | 0.22<br>6 | 6562 | tags=49%,<br>list=33%,<br>signal=72% |
| 16 | HALLMARK_GLYCOLYSIS                | 196 | 0.41 | 1.5  | 0.00<br>3 | 0.0<br>2  | 0.26<br>7 | 4402 | tags=39%,<br>list=22%,<br>signal=49% |
| 17 | HALLMARK_MYOGENESIS                | 197 | 0.4  | 1.49 | 0.00<br>4 | 0.0<br>23 | 0.31<br>5 | 2850 | tags=23%,<br>list=14%,<br>signal=26% |

|    |                                 |     |      |      |       |       |       |      |                                      |
|----|---------------------------------|-----|------|------|-------|-------|-------|------|--------------------------------------|
| 18 | HALLMARK_KRAS_SIGNALING_UP      | 193 | 0.39 | 1.43 | 0.006 | 0.036 | 0.459 | 3404 | tags=34%,<br>list=17%,<br>signal=41% |
| 19 | HALLMARK_KRAS_SIGNALING_DN      | 188 | 0.39 | 1.43 | 0.006 | 0.037 | 0.485 | 3005 | tags=31%,<br>list=15%,<br>signal=36% |
| 20 | HALLMARK_ESTROGEN_RESPONSE_LATE | 196 | 0.35 | 1.3  | 0.035 | 0.116 | 0.906 | 4075 | tags=36%,<br>list=20%,<br>signal=44% |
